# Supplementary material for: PoreMeth2 for decoding the evolution of methylome alterations with nanopore sequencing
Source: HighWire-hosted journal article supplement (doi:10.1101/gr.280259.124), 2025-10-20
Supplement: Supplemental_Table_1.xlsx [file Supplemental_Table_1.xlsx]

## Sheet: DMRs_UD5_Rel_vs_UD5_Tum
chr	start	end	DeltaBeta	DeltaEntropy	BetaRel	BetaTum	EntropyRel	EntropyTum	NumCpG	PValue	Class	chr.GenCode	start.GenCode	end.GenCode	feature.GenCode	strand.GenCode	symbol.GenCode	type.GenCode	chr.GenCode.overlap	start.GenCode.overlap	end.GenCode.overlap	ratio1.GenCode.overlap	ratio2.GenCode.overlap	name.CGI	chr.CGI	start.CGI	end.CGI	chr.CGI.overlap	start.CGI.overlap	end.CGI.overlap	name.Enhancer	chr.Enhancer	start.Enhancer	end.Enhancer	chr.Enhancer.overlap	start.Enhancer.overlap	end.Enhancer.overlap	name.DNASE	chr.DNASE	start.DNASE	end.DNASE	chr.DNASE.overlap	start.DNASE.overlap	end.DNASE.overlap	name.TFBS	chr.TFBS	start.TFBS	end.TFBS	chr.TFBS.overlap
chr1	864070	864818	0.136363636363637	-0.235629883071973	0.88562091503268	0.759615384615385	0.310778128339989	0.531356694507897	21	0.0142268098043949	HypoLow	chr1	861394	865534	Intron2	+	SAMD11	protein_coding	chr1	864070	864818	1	0.180676328502415	*	*	*	*	*	0	0	*	*	*	*	*	0	0	chr1-864745:864895	chr1	864745	864895	chr1	864745	864818	chr1-864812:865408	chr1	864812	865408	chr1
chr1	869332	870458	0.251748251748251	0.056098611351497	0.571428571428571	0.272727272727273	0.635213020743189	0.603759374819711	42	1.43809645036111e-05	HyperHigh	chr1	866470	871151	Intron4	+	SAMD11	protein_coding	chr1	869332	870458	1	0.24054689168981	CpG: 178	chr1	869332	871872	chr1	869332	870458	*	*	*	*	*	0	0	chr1-870305:870590	chr1	870305	870590	chr1	870305	870458	chr1-870432:870828	chr1	870432	870828	chr1
chr1	933222	933794	0.303167420814479	-0.040892394997682	0.578947368421053	0.1875	0.459594497828725	0.507309364962454	16	0.0326308757270341	HyperHigh	chr1	931346	933431	FirstExon	-	RP11-54O7.17	lincRNA	chr1	933222	933431	0.365384615384615	0.100239808153477	CpG: 413	chr1	933387	937410	chr1	933387	933431	*	*	*	*	*	0	0	chr1-933080:933810	chr1	933080	933810	chr1	933222	933431	chr1-933316:933840	chr1	933316	933840	chr1
chr1	933222	933794	0.303167420814479	-0.040892394997682	0.578947368421053	0.1875	0.459594497828725	0.507309364962454	16	0.0326308757270341	HyperHigh	chr1	933432	934432	Promoter	-	RP11-54O7.17	lincRNA	chr1	933432	933794	0.632867132867133	0.362	CpG: 413	chr1	933387	937410	chr1	933432	933794	*	*	*	*	*	0	0	chr1-933080:933810	chr1	933080	933810	chr1	933432	933794	chr1-933749:935050	chr1	933749	935050	chr1
chr1	1016102	1016326	0.199300699300699	0.237989020989926	0.48	0.333333333333333	0.723650198151556	0.554832593066821	16	0.0017221498874686	HypoHigh	*	*	*	InterGenic	*	*	*	*	*	*	*	*	*	*	*	*	*	0	0	*	*	*	*	*	0	0	*	*	*	*	*	0	0	chr1-1016294:1017693	chr1	1016294	1017693	chr1
chr1	1050550	1050968	0.158333333333333	0.222205642738547	0.2	0.0714285714285714	0.478457130258178	0.257742782841639	16	0.0141584982420002	HypoHigh	chr1	1027484	1051439	Intron1	-	C1orf159	protein_coding	chr1	1050550	1050968	1	0.0174493842621582	CpG: 31	chr1	1050515	1050830	chr1	1050550	1050830	*	*	*	*	*	0	0	chr1-1050605:1051035	chr1	1050605	1051035	chr1	1050605	1050968	chr1-1050641:1050777	chr1	1050641	1050777	chr1
chr1	1106944	1107750	-0.440340909090909	0.162591123829328	0.227272727272727	0.75	0.458426455179793	0.5	18	8.52058526909714e-05	HypoHigh	*	*	*	InterGenic	*	*	*	*	*	*	*	*	*	*	*	*	*	0	0	chr1:1107193-1107436	chr1	1107193	1107436	chr1	1107193	1107436	chr1-1107560:1107755	chr1	1107560	1107755	chr1	1107560	1107750	chr1-1107696:1108092	chr1	1107696	1108092	chr1
chr1	1108771	1109756	0.26094346829641	0.174793043583418	0.667410714285715	0.292857142857143	0.468037740839333	0.288262326418938	27	0.00104566632042139	HyperHigh	chr1	1108436	1111776	LastExon	-	TTLL10-AS1	antisense	chr1	1108771	1109756	1	0.294910179640719	CpG: 59	chr1	1109314	1110145	chr1	1109314	1109756	*	*	*	*	*	0	0	chr1-1109645:1109795	chr1	1109645	1109795	chr1	1109645	1109756	chr1-1109723:1110133	chr1	1109723	1110133	chr1
chr1	1108771	1109756	0.26094346829641	0.174793043583418	0.667410714285715	0.292857142857143	0.468037740839333	0.288262326418938	27	0.00104566632042139	HyperHigh	chr1	1108282	1109282	Promoter	+	TTLL10	protein_coding	chr1	1108771	1109282	0.518781725888325	0.511	*	*	*	*	*	0	0	*	*	*	*	*	0	0	chr1-1109025:1109535	chr1	1109025	1109535	chr1	1109025	1109282	chr1-1109163:1109319	chr1	1109163	1109319	chr1
chr1	1108771	1109756	0.26094346829641	0.174793043583418	0.667410714285715	0.292857142857143	0.468037740839333	0.288262326418938	27	0.00104566632042139	HyperHigh	chr1	1109283	1109306	FirstExon	+	TTLL10	protein_coding	chr1	1109283	1109306	0.0233502538071066	1	*	*	*	*	*	0	0	*	*	*	*	*	0	0	chr1-1109025:1109535	chr1	1109025	1109535	chr1	1109283	1109306	chr1-1109163:1109319	chr1	1109163	1109319	chr1
chr1	1108771	1109756	0.26094346829641	0.174793043583418	0.667410714285715	0.292857142857143	0.468037740839333	0.288262326418938	27	0.00104566632042139	HyperHigh	chr1	1109307	1109645	Intron1	+	TTLL10	protein_coding	chr1	1109307	1109645	0.343147208121827	1	CpG: 59	chr1	1109314	1110145	chr1	1109314	1109645	*	*	*	*	*	0	0	chr1-1109025:1109535	chr1	1109025	1109535	chr1	1109307	1109535	chr1-1109610:1109850	chr1	1109610	1109850	chr1
chr1	1108771	1109756	0.26094346829641	0.174793043583418	0.667410714285715	0.292857142857143	0.468037740839333	0.288262326418938	27	0.00104566632042139	HyperHigh	chr1	1109646	1109701	Exon2	+	TTLL10	protein_coding	chr1	1109646	1109701	0.0558375634517767	1	CpG: 59	chr1	1109314	1110145	chr1	1109646	1109701	*	*	*	*	*	0	0	chr1-1109645:1109795	chr1	1109645	1109795	chr1	1109646	1109701	chr1-1109610:1109850	chr1	1109610	1109850	chr1
chr1	1108771	1109756	0.26094346829641	0.174793043583418	0.667410714285715	0.292857142857143	0.468037740839333	0.288262326418938	27	0.00104566632042139	HyperHigh	chr1	1109702	1109803	Intron2	+	TTLL10	protein_coding	chr1	1109702	1109756	0.0548223350253807	0.534653465346535	CpG: 59	chr1	1109314	1110145	chr1	1109702	1109756	*	*	*	*	*	0	0	chr1-1109645:1109795	chr1	1109645	1109795	chr1	1109702	1109756	chr1-1109723:1110133	chr1	1109723	1110133	chr1
chr1	1226061	1226814	-0.28021978021978	0.146120383662764	0.555555555555556	0.833333333333333	0.528320833573719	0.450676700585984	20	0.00400147472001135	HypoHigh	chr1	1226017	1226074	Exon15	+	SCNN1D	protein_coding	chr1	1226061	1226074	0.0172642762284197	0.228070175438596	*	*	*	*	*	0	0	*	*	*	*	*	0	0	chr1-1225600:1226135	chr1	1225600	1226135	chr1	1226061	1226074	chr1-1225940:1226470	chr1	1225940	1226470	chr1
chr1	1226061	1226814	-0.28021978021978	0.146120383662764	0.555555555555556	0.833333333333333	0.528320833573719	0.450676700585984	20	0.00400147472001135	HypoHigh	chr1	1226075	1226274	Intron15	+	SCNN1D	protein_coding	chr1	1226075	1226274	0.264276228419655	1	*	*	*	*	*	0	0	*	*	*	*	*	0	0	chr1-1226165:1226355	chr1	1226165	1226355	chr1	1226165	1226274	chr1-1225940:1226470	chr1	1225940	1226470	chr1
chr1	1226061	1226814	-0.28021978021978	0.146120383662764	0.555555555555556	0.833333333333333	0.528320833573719	0.450676700585984	20	0.00400147472001135	HypoHigh	chr1	1226275	1226333	Exon16	+	SCNN1D	protein_coding	chr1	1226275	1226333	0.0770252324037185	1	*	*	*	*	*	0	0	*	*	*	*	*	0	0	chr1-1226165:1226355	chr1	1226165	1226355	chr1	1226275	1226333	chr1-1226324:1227662	chr1	1226324	1227662	chr1
chr1	1226061	1226814	-0.28021978021978	0.146120383662764	0.555555555555556	0.833333333333333	0.528320833573719	0.450676700585984	20	0.00400147472001135	HypoHigh	chr1	1226334	1226444	Intron16	+	SCNN1D	protein_coding	chr1	1226334	1226444	0.146082337317397	1	*	*	*	*	*	0	0	*	*	*	*	*	0	0	chr1-1226385:1226575	chr1	1226385	1226575	chr1	1226385	1226444	chr1-1226344:1229405	chr1	1226344	1229405	chr1
chr1	1226061	1226814	-0.28021978021978	0.146120383662764	0.555555555555556	0.833333333333333	0.528320833573719	0.450676700585984	20	0.00400147472001135	HypoHigh	chr1	1226445	1226520	Exon17	+	SCNN1D	protein_coding	chr1	1226445	1226520	0.099601593625498	1	*	*	*	*	*	0	0	*	*	*	*	*	0	0	chr1-1226385:1226575	chr1	1226385	1226575	chr1	1226445	1226520	chr1-1226344:1229405	chr1	1226344	1229405	chr1
chr1	1226061	1226814	-0.28021978021978	0.146120383662764	0.555555555555556	0.833333333333333	0.528320833573719	0.450676700585984	20	0.00400147472001135	HypoHigh	chr1	1226521	1226633	Intron17	+	SCNN1D	protein_coding	chr1	1226521	1226633	0.148738379814077	1	*	*	*	*	*	0	0	*	*	*	*	*	0	0	chr1-1226605:1227510	chr1	1226605	1227510	chr1	1226605	1226633	chr1-1226576:1228166	chr1	1226576	1228166	chr1
chr1	1226061	1226814	-0.28021978021978	0.146120383662764	0.555555555555556	0.833333333333333	0.528320833573719	0.450676700585984	20	0.00400147472001135	HypoHigh	chr1	1226634	1227399	LastExon	+	SCNN1D	protein_coding	chr1	1226634	1226814	0.239043824701195	0.235294117647059	*	*	*	*	*	0	0	*	*	*	*	*	0	0	chr1-1226605:1227510	chr1	1226605	1227510	chr1	1226634	1226814	chr1-1226688:1227531	chr1	1226688	1227531	chr1
chr1	1240257	1240685	0.310110967463909	-0.043514254036167	0.785714285714285	0.431372549019608	0.437096626973749	0.528320833573719	11	0.00719692102632241	HyperHigh	chr1	1239524	1243148	Intron1	-	ACAP3	protein_coding	chr1	1240257	1240685	1	0.118101545253863	*	*	*	*	*	0	0	*	*	*	*	*	0	0	chr1-1240365:1241255	chr1	1240365	1241255	chr1	1240365	1240685	chr1-1240682:1241443	chr1	1240682	1241443	chr1
chr1	1382048	1382717	-0.0888888888888889	0.231025432913857	0.833333333333333	0.933333333333333	0.437092708153044	0.222854814399865	22	0.00299655842155046	HypoHigh	*	*	*	InterGenic	*	*	*	*	*	*	*	*	*	*	*	*	*	0	0	*	*	*	*	*	0	0	*	*	*	*	*	0	0	*	*	*	*	*
chr1	1446148	1446839	0.239371980676329	-0.0193623917200705	0.614832535885167	0.35625	0.361654166907053	0.363819814440998	15	0.0431217968606162	HyperHigh	chr1	1446530	1447530	Promoter	+	ATAD3A	protein_coding	chr1	1446530	1446839	0.447178002894356	0.309	*	*	*	*	*	0	0	*	*	*	*	*	0	0	chr1-1446365:1446995	chr1	1446365	1446995	chr1	1446530	1446839	chr1-1446833:1447437	chr1	1446833	1447437	chr1
chr1	1474869	1475356	0.255244755244755	-0.086700634845237	0.727272727272727	0.391304347826087	0.63208020839343	0.716465823449233	20	0.00402351636064012	HyperHigh	chr1	1471178	1475063	Intron2	-	TMEM240	protein_coding	chr1	1474869	1475063	0.398357289527721	0.0499356499356499	CpG: 32	chr1	1474962	1475220	chr1	1474962	1475063	*	*	*	*	*	0	0	chr1-1474560:1476135	chr1	1474560	1476135	chr1	1474869	1475063	chr1-1474999:1475283	chr1	1474999	1475283	chr1
chr1	1474869	1475356	0.255244755244755	-0.086700634845237	0.727272727272727	0.391304347826087	0.63208020839343	0.716465823449233	20	0.00402351636064012	HyperHigh	chr1	1475064	1475170	Exon2	-	TMEM240	protein_coding	chr1	1475064	1475170	0.217659137577002	1	CpG: 32	chr1	1474962	1475220	chr1	1475064	1475170	*	*	*	*	*	0	0	chr1-1474560:1476135	chr1	1474560	1476135	chr1	1475064	1475170	chr1-1474999:1475283	chr1	1474999	1475283	chr1
chr1	1474869	1475356	0.255244755244755	-0.086700634845237	0.727272727272727	0.391304347826087	0.63208020839343	0.716465823449233	20	0.00402351636064012	HyperHigh	chr1	1475171	1475669	Intron1	-	TMEM240	protein_coding	chr1	1475171	1475356	0.379876796714579	0.3714859437751	CpG: 32	chr1	1474962	1475220	chr1	1475171	1475220	*	*	*	*	*	0	0	chr1-1474560:1476135	chr1	1474560	1476135	chr1	1475171	1475356	chr1-1475308:1476149	chr1	1475308	1476149	chr1
chr1	1476218	1476426	0.19514652014652	-0.237128260703737	0.917016806722689	0.657142857142857	0.289714436180788	0.646543313583029	13	0.0120939768267807	HypoLow	chr1	1475738	1476738	Promoter	-	TMEM240	protein_coding	chr1	1476218	1476426	1	0.208	CpG: 55	chr1	1476093	1476669	chr1	1476218	1476426	*	*	*	*	*	0	0	chr1-1476205:1476935	chr1	1476205	1476935	chr1	1476218	1476426	chr1-1476308:1476984	chr1	1476308	1476984	chr1
chr1	1549538	1550150	0.253333333333333	0.18173628963518	0.416666666666667	0.181818181818182	0.61412366439237	0.478506834760889	16	0.00842025785553819	HyperHigh	chr1	1549138	1551175	FirstExon	-	RP11-345P4.9	antisense	chr1	1549538	1550150	1	0.300441826215022	*	*	*	*	*	0	0	*	*	*	*	*	0	0	chr1-1549565:1550250	chr1	1549565	1550250	chr1	1549565	1550150	chr1-1550099:1550495	chr1	1550099	1550495	chr1
chr1	1549538	1550150	0.253333333333333	0.18173628963518	0.416666666666667	0.181818181818182	0.61412366439237	0.478506834760889	16	0.00842025785553819	HyperHigh	chr1	1549794	1550794	Promoter	+	MIB2	protein_coding	chr1	1549794	1550150	0.581699346405229	0.356	*	*	*	*	*	0	0	*	*	*	*	*	0	0	chr1-1549565:1550250	chr1	1549565	1550250	chr1	1549794	1550150	chr1-1550099:1550495	chr1	1550099	1550495	chr1
chr1	1568924	1569644	0.114478114478114	-0.278565256017738	0.928571428571429	0.777777777777778	0.259783279097362	0.598245572601161	30	0.00032328318943205	HypoLow	chr1	1568735	1569126	Intron4	+	MMP23B	protein_coding	chr1	1568924	1569126	0.280555555555556	0.516624040920716	CpG: 470	chr1	1564421	1570006	chr1	1568924	1569126	*	*	*	*	*	0	0	*	*	*	*	*	0	0	*	*	*	*	*
chr1	1568924	1569644	0.114478114478114	-0.278565256017738	0.928571428571429	0.777777777777778	0.259783279097362	0.598245572601161	30	0.00032328318943205	HypoLow	chr1	1569127	1569291	Exon5	+	MMP23B	protein_coding	chr1	1569127	1569291	0.227777777777778	1	CpG: 470	chr1	1564421	1570006	chr1	1569127	1569291	*	*	*	*	*	0	0	*	*	*	*	*	0	0	*	*	*	*	*
chr1	1568924	1569644	0.114478114478114	-0.278565256017738	0.928571428571429	0.777777777777778	0.259783279097362	0.598245572601161	30	0.00032328318943205	HypoLow	chr1	1569292	1569367	Intron5	+	MMP23B	protein_coding	chr1	1569292	1569367	0.104166666666667	1	CpG: 470	chr1	1564421	1570006	chr1	1569292	1569367	*	*	*	*	*	0	0	*	*	*	*	*	0	0	*	*	*	*	*
chr1	1568924	1569644	0.114478114478114	-0.278565256017738	0.928571428571429	0.777777777777778	0.259783279097362	0.598245572601161	30	0.00032328318943205	HypoLow	chr1	1569368	1569478	Exon6	+	MMP23B	protein_coding	chr1	1569368	1569478	0.152777777777778	1	CpG: 470	chr1	1564421	1570006	chr1	1569368	1569478	*	*	*	*	*	0	0	*	*	*	*	*	0	0	*	*	*	*	*
chr1	1568924	1569644	0.114478114478114	-0.278565256017738	0.928571428571429	0.777777777777778	0.259783279097362	0.598245572601161	30	0.00032328318943205	HypoLow	chr1	1569479	1569580	Intron6	+	MMP23B	protein_coding	chr1	1569479	1569580	0.140277777777778	1	CpG: 470	chr1	1564421	1570006	chr1	1569479	1569580	*	*	*	*	*	0	0	*	*	*	*	*	0	0	*	*	*	*	*
chr1	1568924	1569644	0.114478114478114	-0.278565256017738	0.928571428571429	0.777777777777778	0.259783279097362	0.598245572601161	30	0.00032328318943205	HypoLow	chr1	1569581	1569707	Exon7	+	MMP23B	protein_coding	chr1	1569581	1569644	0.0875	0.5	CpG: 470	chr1	1564421	1570006	chr1	1569581	1569644	*	*	*	*	*	0	0	*	*	*	*	*	0	0	*	*	*	*	*
chr1	1617528	1618222	0.278399403239557	-0.0698994724694045	0.857142857142857	0.404705882352941	0.341284142198329	0.466179887923444	19	0.00714947877132798	HyperHigh	chr1	1608286	1623887	Intron1	-	SLC35E2B	protein_coding	chr1	1617528	1618222	1	0.0444843279276969	*	*	*	*	*	0	0	*	*	*	*	*	0	0	chr1-1618000:1618150	chr1	1618000	1618150	chr1	1618000	1618150	chr1-1618023:1618279	chr1	1618023	1618279	chr1
chr1	1690259	1690810	0.142127799736495	-0.264047706973043	0.908902691511387	0.78416149068323	0.279968276146942	0.517955578840946	21	7.74100293666781e-05	HypoLow	chr1	1688750	1690539	Intron5	-	NADK	protein_coding	chr1	1690259	1690539	0.508166969147005	0.156512017887088	*	*	*	*	*	0	0	*	*	*	*	*	0	0	chr1-1690225:1690595	chr1	1690225	1690595	chr1	1690259	1690539	chr1-1690509:1690813	chr1	1690509	1690813	chr1
chr1	1690259	1690810	0.142127799736495	-0.264047706973043	0.908902691511387	0.78416149068323	0.279968276146942	0.517955578840946	21	7.74100293666781e-05	HypoLow	chr1	1690540	1690682	Exon5	-	NADK	protein_coding	chr1	1690540	1690682	0.257713248638838	1	*	*	*	*	*	0	0	*	*	*	*	*	0	0	chr1-1690600:1690655	chr1	1690600	1690655	chr1	1690600	1690655	chr1-1690562:1691205	chr1	1690562	1691205	chr1
chr1	1690259	1690810	0.142127799736495	-0.264047706973043	0.908902691511387	0.78416149068323	0.279968276146942	0.517955578840946	21	7.74100293666781e-05	HypoLow	chr1	1690683	1691172	Intron4	-	NADK	protein_coding	chr1	1690683	1690810	0.23049001814882	0.259713701431493	*	*	*	*	*	0	0	*	*	*	*	*	0	0	chr1-1690725:1690890	chr1	1690725	1690890	chr1	1690725	1690810	chr1-1690749:1691159	chr1	1690749	1691159	chr1
chr1	1713522	1714270	0.290441176470588	-0.306098611351497	0.888888888888889	0.538461538461538	0.318144667641655	0.515531188098313	20	0.00566647515399266	HyperLow	*	*	*	InterGenic	*	*	*	*	*	*	*	*	CpG: 45	chr1	1713639	1714141	chr1	1713639	1714141	chr1:1714020-1714715	chr1	1714020	1714715	chr1	1714020	1714270	chr1-1713785:1715135	chr1	1713785	1715135	chr1	1713785	1714270	chr1-1714261:1714631	chr1	1714261	1714631	chr1
chr1	1858019	1858948	-0.095238095238095	0.281232870730736	0.785714285714286	0.916666666666667	0.478457130258178	0.216674140549451	20	0.0221092020372451	HypoHigh	*	*	*	InterGenic	*	*	*	*	*	*	*	*	*	*	*	*	*	0	0	*	*	*	*	*	0	0	chr1-1858825:1859175	chr1	1858825	1859175	chr1	1858825	1858948	chr1-1858157:1858587	chr1	1858157	1858587	chr1
chr1	1861059	1861754	-0.0588235294117651	0.216674140549451	0.869565217391304	0.956521739130435	0.38003855950487	0.130414521209752	22	0.00626621568811565	HypoHigh	*	*	*	InterGenic	*	*	*	*	*	*	*	*	*	*	*	*	*	0	0	*	*	*	*	*	0	0	chr1-1861445:1861595	chr1	1861445	1861595	chr1	1861445	1861595	chr1-1861261:1861925	chr1	1861261	1861925	chr1
chr1	1897476	1898081	-0.254464285714286	-0.129022205451877	0.235384615384615	0.485294117647059	0.560822916223592	0.712927859519488	23	8.82710206433604e-05	HypoLow	*	*	*	InterGenic	*	*	*	*	*	*	*	*	CpG: 17	chr1	1897581	1897786	chr1	1897581	1897786	*	*	*	*	*	0	0	chr1-1897885:1898110	chr1	1897885	1898110	chr1	1897885	1898081	chr1-1897720:1898144	chr1	1897720	1898144	chr1
chr1	1957111	1957710	-0.256629855007137	0.19632131889002	0.548094373865699	0.869747899159664	0.584614887908556	0.412670602132302	19	5.46115502313892e-05	HypoHigh	chr1	1956957	1957177	Exon4	+	GABRD	protein_coding	chr1	1957111	1957177	0.110183639398998	0.3	CpG: 35	chr1	1957046	1957386	chr1	1957111	1957177	*	*	*	*	*	0	0	chr1-1956885:1957755	chr1	1956885	1957755	chr1	1957111	1957177	chr1-1957105:1957595	chr1	1957105	1957595	chr1
chr1	1957111	1957710	-0.256629855007137	0.19632131889002	0.548094373865699	0.869747899159664	0.584614887908556	0.412670602132302	19	5.46115502313892e-05	HypoHigh	chr1	1957178	1959015	Intron4	+	GABRD	protein_coding	chr1	1957178	1957710	0.888146911519199	0.289602612955906	CpG: 35	chr1	1957046	1957386	chr1	1957178	1957386	*	*	*	*	*	0	0	chr1-1956885:1957755	chr1	1956885	1957755	chr1	1957178	1957710	chr1-1957105:1957595	chr1	1957105	1957595	chr1
chr1	2130634	2131169	0.251086956521739	0.0950712078942725	0.5	0.240384615384616	0.481499136201876	0.415383283177419	15	0.000616976843877531	HyperHigh	chr1	2130193	2132664	Exon4	-	C1orf86	protein_coding	chr1	2130634	2131169	1	0.216511533791987	*	*	*	*	*	0	0	*	*	*	*	*	0	0	chr1-2130565:2131250	chr1	2130565	2131250	chr1	2130634	2131169	chr1-2131162:2131602	chr1	2131162	2131602	chr1
chr1	2161048	2164637	0.229885057471264	0.140154907173564	0.5	0.181818181818182	0.566813239380364	0.417209722462608	92	2.67542279122164e-07	HyperHigh	chr1	2160134	2161174	FirstExon	+	SKI	protein_coding	chr1	2161048	2161174	0.0351072722206743	0.121153846153846	CpG: 238	chr1	2158212	2161173	chr1	2161048	2161173	*	*	*	*	*	0	0	chr1-2159625:2162395	chr1	2159625	2162395	chr1	2161048	2161174	chr1-2160966:2161262	chr1	2160966	2161262	chr1
chr1	2161048	2164637	0.229885057471264	0.140154907173564	0.5	0.181818181818182	0.566813239380364	0.417209722462608	92	2.67542279122164e-07	HyperHigh	chr1	2161175	2234416	Intron1	+	SKI	protein_coding	chr1	2161175	2164637	0.964614098634717	0.0472686063816715	*	*	*	*	*	0	0	chr1:2162325-2162996	chr1	2162325	2162996	chr1	2162325	2162996	chr1-2163960:2164670	chr1	2163960	2164670	chr1	2163960	2164637	chr1-2164536:2164940	chr1	2164536	2164940	chr1
chr1	2188408	2191724	0.0740740740740741	-0.207453977882591	0.964285714285714	0.891812865497076	0.188836502184302	0.417209722462608	63	3.73585872247934e-06	HypoLow	chr1	2161175	2234416	Intron1	+	SKI	protein_coding	chr1	2188408	2191724	1	0.0452751873950383	*	*	*	*	*	0	0	chr1:2190530-2190674	chr1	2190530	2190674	chr1	2190530	2190674	chr1-2191005:2191155	chr1	2191005	2191155	chr1	2191005	2191155	chr1-2191568:2191796	chr1	2191568	2191796	chr1
chr1	2414393	2415849	-0.083577712609971	0.244035284126792	0.833333333333333	0.923076923076923	0.408131481801995	0.197224259527442	36	0.00250800478961695	HypoHigh	chr1	2411752	2415886	Intron4	+	PLCH2	protein_coding	chr1	2414393	2415849	1	0.352201257861635	CpG: 29	chr1	2415198	2415506	chr1	2415198	2415506	*	*	*	*	*	0	0	chr1-2415065:2415215	chr1	2415065	2415215	chr1	2415065	2415215	chr1-2415396:2415720	chr1	2415396	2415720	chr1
chr1	2475911	2476748	0.156220419202163	-0.245317903718822	0.925824175824176	0.73494983277592	0.240642698295787	0.510704445235875	19	0.00121529115759532	HypoLow	*	*	*	InterGenic	*	*	*	*	*	*	*	*	*	*	*	*	*	0	0	chr1:2476299-2476723	chr1	2476299	2476723	chr1	2476299	2476723	chr1-2476340:2476715	chr1	2476340	2476715	chr1	2476340	2476715	chr1-2476658:2476978	chr1	2476658	2476978	chr1
chr1	2523884	2524558	-0.136302541544477	-0.21432658667161	0.120192307692308	0.254032258064516	0.318921902788771	0.536504578856869	21	0.0325362801321566	HypoLow	chr1	2523467	2524093	Intron21	-	MMEL1	protein_coding	chr1	2523884	2524093	0.310089020771513	0.333865814696486	*	*	*	*	*	0	0	*	*	*	*	*	0	0	*	*	*	*	*	0	0	chr1-2523984:2524753	chr1	2523984	2524753	chr1
chr1	2523884	2524558	-0.136302541544477	-0.21432658667161	0.120192307692308	0.254032258064516	0.318921902788771	0.536504578856869	21	0.0325362801321566	HypoLow	chr1	2524094	2524159	Exon21	-	MMEL1	protein_coding	chr1	2524094	2524159	0.0964391691394659	1	*	*	*	*	*	0	0	*	*	*	*	*	0	0	*	*	*	*	*	0	0	chr1-2524151:2524587	chr1	2524151	2524587	chr1
chr1	2523884	2524558	-0.136302541544477	-0.21432658667161	0.120192307692308	0.254032258064516	0.318921902788771	0.536504578856869	21	0.0325362801321566	HypoLow	chr1	2524160	2524271	Intron20	-	MMEL1	protein_coding	chr1	2524160	2524271	0.164688427299703	1	*	*	*	*	*	0	0	*	*	*	*	*	0	0	chr1-2524180:2524535	chr1	2524180	2524535	chr1	2524180	2524271	chr1-2524193:2524478	chr1	2524193	2524478	chr1
chr1	2523884	2524558	-0.136302541544477	-0.21432658667161	0.120192307692308	0.254032258064516	0.318921902788771	0.536504578856869	21	0.0325362801321566	HypoLow	chr1	2524272	2524405	Exon20	-	MMEL1	protein_coding	chr1	2524272	2524405	0.197329376854599	1	*	*	*	*	*	0	0	*	*	*	*	*	0	0	chr1-2524180:2524535	chr1	2524180	2524535	chr1	2524272	2524405	chr1-2524289:2524545	chr1	2524289	2524545	chr1
chr1	2523884	2524558	-0.136302541544477	-0.21432658667161	0.120192307692308	0.254032258064516	0.318921902788771	0.536504578856869	21	0.0325362801321566	HypoLow	chr1	2524406	2525252	Intron19	-	MMEL1	protein_coding	chr1	2524406	2524558	0.225519287833828	0.179669030732861	*	*	*	*	*	0	0	*	*	*	*	*	0	0	chr1-2524180:2524535	chr1	2524180	2524535	chr1	2524406	2524535	chr1-2524463:2525099	chr1	2524463	2525099	chr1
chr1	2528493	2529516	-0.434782608695653	0.190881467991872	0.380952380952381	0.862068965517241	0.538110278386422	0.331130909670121	26	2.28524016572296e-06	HypoHigh	chr1	2528129	2529645	Intron13	-	MMEL1	protein_coding	chr1	2528493	2529516	1	0.674802110817942	*	*	*	*	*	0	0	*	*	*	*	*	0	0	chr1-2529040:2529210	chr1	2529040	2529210	chr1	2529040	2529210	chr1-2529088:2529258	chr1	2529088	2529258	chr1
chr1	2706086	2707132	0.307104454685101	-0.070982872985943	0.613095238095238	0.338541666666667	0.470830397875938	0.488298927150861	37	7.01018436238366e-05	HyperHigh	chr1	2702498	2717335	Intron2	-	TTC34	protein_coding	chr1	2706086	2707132	1	0.0704994271079059	CpG: 111	chr1	2706025	2706961	chr1	2706086	2706961	*	*	*	*	*	0	0	chr1-2706905:2707055	chr1	2706905	2707055	chr1	2706905	2707055	chr1-2706110:2706343	chr1	2706110	2706343	chr1
chr1	2947312	2948503	-0.0753968253968255	0.206423424856105	0.835561497326203	0.942810457516339	0.4985524428394	0.269058308630539	29	0.0069222840542633	HypoHigh	*	*	*	InterGenic	*	*	*	*	*	*	*	*	*	*	*	*	*	0	0	*	*	*	*	*	0	0	chr1-2948205:2948355	chr1	2948205	2948355	chr1	2948205	2948355	*	*	*	*	*
chr1	3328200	3328358	-0.453225806451613	0.0702193125153189	0.32	0.8	0.607605200117505	0.528320833573719	8	0.0262237762237762	HypoHigh	chr1	3327948	3329364	Exon9	+	PRDM16	protein_coding	chr1	3328200	3328358	1	0.111581920903955	CpG: 107	chr1	3327991	3329424	chr1	3328200	3328358	*	*	*	*	*	0	0	chr1-3327940:3328495	chr1	3327940	3328495	chr1	3328200	3328358	*	*	*	*	*
chr1	3382433	3382854	-0.3963133640553	-0.075943851843006	0.111111111111111	0.5	0.240642698295787	0.459594497828725	16	4.42226229972055e-06	HypoMid	chr1	3380237	3382711	Intron2	+	ARHGEF16	protein_coding	chr1	3382433	3382711	0.660332541567696	0.112368633791431	*	*	*	*	*	0	0	*	*	*	*	*	0	0	chr1-3382305:3382815	chr1	3382305	3382815	chr1	3382433	3382711	chr1-3382405:3382645	chr1	3382405	3382645	chr1
chr1	3382433	3382854	-0.3963133640553	-0.075943851843006	0.111111111111111	0.5	0.240642698295787	0.459594497828725	16	4.42226229972055e-06	HypoMid	chr1	3382712	3382757	Exon3	+	ARHGEF16	protein_coding	chr1	3382712	3382757	0.106888361045131	1	*	*	*	*	*	0	0	*	*	*	*	*	0	0	chr1-3382305:3382815	chr1	3382305	3382815	chr1	3382712	3382757	chr1-3382388:3382718	chr1	3382388	3382718	chr1
chr1	3382433	3382854	-0.3963133640553	-0.075943851843006	0.111111111111111	0.5	0.240642698295787	0.459594497828725	16	4.42226229972055e-06	HypoMid	chr1	3382758	3383731	Intron3	+	ARHGEF16	protein_coding	chr1	3382758	3382854	0.228028503562945	0.0986639260020555	*	*	*	*	*	0	0	*	*	*	*	*	0	0	chr1-3382305:3382815	chr1	3382305	3382815	chr1	3382758	3382815	chr1-3382300:3382984	chr1	3382300	3382984	chr1
chr1	3436950	3437798	-0.153846153846154	0.287130662935566	0.8	0.944444444444444	0.431820614746107	0.197224259527442	22	0.000599051862770251	HypoHigh	chr1	3432092	3440687	Intron5	-	MEGF6	protein_coding	chr1	3436950	3437798	1	0.0986620127981385	*	*	*	*	*	0	0	*	*	*	*	*	0	0	chr1-3437065:3437630	chr1	3437065	3437630	chr1	3437065	3437630	chr1-3437780:3438316	chr1	3437780	3438316	chr1
chr1	3446510	3447077	0.287938596491228	-0.00370366219830548	0.705741626794258	0.270833333333333	0.411152864448116	0.528320833573719	13	0.0425815384730595	HyperHigh	chr1	3440811	3496388	Intron4	-	MEGF6	protein_coding	chr1	3446510	3447077	1	0.0102020620040664	*	*	*	*	*	0	0	*	*	*	*	*	0	0	chr1-3446685:3448635	chr1	3446685	3448635	chr1	3446685	3447077	chr1-3446917:3447572	chr1	3446917	3447572	chr1
chr1	3456257	3457615	0.0954545454545455	-0.263718949774322	1	0.888888888888889	0	0.306703988156976	27	7.11053450698925e-06	HypoLow	chr1	3440811	3496388	Intron4	-	MEGF6	protein_coding	chr1	3456257	3457615	1	0.0244345682566529	*	*	*	*	*	0	0	*	*	*	*	*	0	0	chr1-3457505:3457655	chr1	3457505	3457655	chr1	3457505	3457615	chr1-3457601:3457920	chr1	3457601	3457920	chr1
chr1	3567134	3568049	0.208133971291866	0.179566484630838	0.375	0.137931034482759	0.631820614746107	0.459594497828725	34	0.000278658107599134	HyperHigh	chr1	3566638	3567638	Promoter	-	WRAP73	protein_coding	chr1	3567134	3567638	0.550819672131148	0.504	CpG: 284	chr1	3566445	3569636	chr1	3567134	3567638	*	*	*	*	*	0	0	chr1-3567225:3570175	chr1	3567225	3570175	chr1	3567225	3567638	chr1-3567570:3568274	chr1	3567570	3568274	chr1
chr1	3590423	3591180	-0.206359649122807	0.166383502138741	0.554179566563467	0.842105263157895	0.43386298981536	0.365657579728377	21	0.0230353891025522	HypoHigh	chr1	3569206	3598896	Intron1	+	TP73	protein_coding	chr1	3590423	3591180	1	0.025496800269451	*	*	*	*	*	0	0	chr1:3590266-3590494	chr1	3590266	3590494	chr1	3590423	3590494	chr1-3590700:3590970	chr1	3590700	3590970	chr1	3590700	3590970	chr1-3591045:3591461	chr1	3591045	3591461	chr1
chr1	3604792	3605254	0.159020673486787	-0.274078345916401	0.916666666666667	0.629464285714285	0.279522456986059	0.619448860183773	13	0.00788472326971028	HypoLow	chr1	3599745	3624112	Intron3	+	TP73	protein_coding	chr1	3604792	3605254	1	0.0189600689457053	*	*	*	*	*	0	0	*	*	*	*	*	0	0	chr1-3604925:3605275	chr1	3604925	3605275	chr1	3604925	3605254	chr1-3605074:3605190	chr1	3605074	3605190	chr1
chr1	3620497	3621014	0.437229437229437	0.039818789089434	0.62962962962963	0.151515151515152	0.417209722462608	0.382944951426972	22	3.10546691241322e-08	HyperHigh	chr1	3599745	3624112	Intron3	+	TP73	protein_coding	chr1	3620497	3621014	1	0.0212172200106702	*	*	*	*	*	0	0	*	*	*	*	*	0	0	chr1-3620345:3620850	chr1	3620345	3620850	chr1	3620497	3620850	chr1-3620309:3620633	chr1	3620309	3620633	chr1
chr1	3835507	3837010	0.166666666666667	-0.212324816228957	0.964285714285714	0.80952380952381	0.240952632577656	0.45698353148489	22	0.000354061491401394	HypoLow	*	*	*	InterGenic	*	*	*	*	*	*	*	*	*	*	*	*	*	0	0	*	*	*	*	*	0	0	chr1-3836445:3836595	chr1	3836445	3836595	chr1	3836445	3836595	chr1-3836661:3837157	chr1	3836661	3837157	chr1
chr1	4046042	4048197	0.104859335038363	-0.295048017339074	0.952380952380952	0.833333333333333	0.270426041486378	0.546252893638336	34	3.61790366076624e-05	HypoLow	*	*	*	InterGenic	*	*	*	*	*	*	*	*	*	*	*	*	*	0	0	*	*	*	*	*	0	0	chr1-4047880:4048030	chr1	4047880	4048030	chr1	4047880	4048030	chr1-4047800:4047935	chr1	4047800	4047935	chr1
chr1	4398360	4401465	-0.138888888888889	0.291172213739339	0.777777777777778	0.923076923076923	0.615479781557005	0.328808909576947	24	0.002682632215862	HypoHigh	*	*	*	InterGenic	*	*	*	*	*	*	*	*	*	*	*	*	*	0	0	*	*	*	*	*	0	0	chr1-4400565:4400855	chr1	4400565	4400855	chr1	4400565	4400855	chr1-4400624:4400847	chr1	4400624	4400847	chr1
chr1	4995867	4997569	-0.11	0.270859138382303	0.795150501672241	0.958333333333333	0.436335955801305	0.257859834034279	21	0.0101416782743675	HypoHigh	*	*	*	InterGenic	*	*	*	*	*	*	*	*	*	*	*	*	*	0	0	*	*	*	*	*	0	0	chr1-4996825:4996975	chr1	4996825	4996975	chr1	4996825	4996975	chr1-4995969:4996226	chr1	4995969	4996226	chr1
chr1	5400835	5401567	0.026515151515151	0.228930710683407	0.888888888888889	0.909090909090909	0.306098611351497	0.287706856188877	12	0.554082551866989	HypoHigh	*	*	*	InterGenic	*	*	*	*	*	*	*	*	*	*	*	*	*	0	0	*	*	*	*	*	0	0	chr1-5401485:5401735	chr1	5401485	5401735	chr1	5401485	5401567	chr1-5400901:5401147	chr1	5400901	5401147	chr1
chr1	5663660	5665958	-0.125217391304348	0.340047793350456	0.857859531772575	1	0.472765278018163	0.138456758425128	17	0.000806159985206421	HypoHigh	chr1	5647636	5728200	Intron1	-	RP11-154H17.1	lincRNA	chr1	5663660	5665958	1	0.0285239064594608	*	*	*	*	*	0	0	*	*	*	*	*	0	0	*	*	*	*	*	0	0	chr1-5665048:5665424	chr1	5665048	5665424	chr1
chr1	5824200	5825215	0.233716475095786	-0.122581780863901	0.833333333333333	0.529411764705882	0.45698353148489	0.494553054799321	18	0.025044650525286	HyperLow	*	*	*	InterGenic	*	*	*	*	*	*	*	*	*	*	*	*	*	0	0	*	*	*	*	*	0	0	chr1-5824925:5825215	chr1	5824925	5825215	chr1	5824925	5825215	chr1-5825008:5825726	chr1	5825008	5825726	chr1
chr1	5868278	5870754	0.052631578947368	-0.217840438223797	0.964285714285714	0.888888888888889	0.196542060395771	0.43056399904602	36	0.000303082797004571	HypoLow	*	*	*	InterGenic	*	*	*	*	*	*	*	*	*	*	*	*	*	0	0	*	*	*	*	*	0	0	chr1-5870745:5870955	chr1	5870745	5870955	chr1	5870745	5870754	chr1-5869546:5870024	chr1	5869546	5870024	chr1
chr1	6029732	6036399	0.066666666666667	-0.204789815295586	0.964285714285714	0.9	0.181188147733199	0.385593216482346	110	1.50793139770353e-10	HypoLow	chr1	6029320	6038329	Intron3	-	NPHP4	protein_coding	chr1	6029732	6036399	1	0.74003774003774	*	*	*	*	*	0	0	chr1:6034742-6034859	chr1	6034742	6034859	chr1	6034742	6034859	chr1-6035605:6036335	chr1	6035605	6036335	chr1	6035605	6036335	chr1-6036137:6036517	chr1	6036137	6036517	chr1
chr1	6187670	6188263	0.240384615384615	-0.448003680548648	1	0.75	0.108471930656785	0.518784755653703	23	1.93504402762045e-08	HyperLow	chr1	6186807	6188105	Intron25	-	CHD5	protein_coding	chr1	6187670	6188105	0.733558178752108	0.335130970724191	CpG: 41	chr1	6187743	6188235	chr1	6187743	6188105	*	*	*	*	*	0	0	chr1-6187805:6188415	chr1	6187805	6188415	chr1	6187805	6188105	chr1-6187932:6188519	chr1	6187932	6188519	chr1
chr1	6187670	6188263	0.240384615384615	-0.448003680548648	1	0.75	0.108471930656785	0.518784755653703	23	1.93504402762045e-08	HyperLow	chr1	6188106	6188278	Exon25	-	CHD5	protein_coding	chr1	6188106	6188263	0.264755480607083	0.912790697674419	CpG: 41	chr1	6187743	6188235	chr1	6188106	6188235	*	*	*	*	*	0	0	chr1-6187805:6188415	chr1	6187805	6188415	chr1	6188106	6188263	chr1-6188224:6188568	chr1	6188224	6188568	chr1
chr1	6321552	6322045	0.234615384615385	0.222533680544345	0.384615384615385	0.15	0.689010498385861	0.5	16	0.0180153486344094	HyperHigh	chr1	6321036	6322036	Promoter	-	GPR153	protein_coding	chr1	6321552	6322036	0.981744421906694	0.484	*	*	*	*	*	0	0	chr1:6321567-6321961	chr1	6321567	6321961	chr1	6321567	6321961	chr1-6321725:6322655	chr1	6321725	6322655	chr1	6321725	6322036	chr1-6321843:6322086	chr1	6321843	6322086	chr1
chr1	6415946	6416506	0	0.285714285714286	0.888888888888889	0.928571428571429	0.381703471460528	0	14	0.233431501758065	HypoHigh	chr1	6409927	6453316	Intron1	-	ACOT7	protein_coding	chr1	6415946	6416506	1	0.0129064970384199	*	*	*	*	*	0	0	*	*	*	*	*	0	0	chr1-6416445:6416675	chr1	6416445	6416675	chr1	6416445	6416506	chr1-6416480:6416753	chr1	6416480	6416753	chr1
chr1	6430143	6430843	0.242424242424242	-0.355912610164326	0.923076923076923	0.733333333333333	0.188836502184302	0.583333333333333	10	0.0128025770921109	HyperLow	chr1	6409927	6453316	Intron1	-	ACOT7	protein_coding	chr1	6430143	6430843	1	0.0161331212980248	*	*	*	*	*	0	0	*	*	*	*	*	0	0	*	*	*	*	*	0	0	chr1-6430627:6431047	chr1	6430627	6431047	chr1
chr1	6766647	6767433	0.223039215686274	-0.248282831471937	0.933333333333333	0.714285714285714	0.328808909576947	0.579422976025488	10	0.0932285905027735	HyperLow	*	*	*	InterGenic	*	*	*	*	*	*	*	*	*	*	*	*	*	0	0	*	*	*	*	*	0	0	chr1-6767385:6767535	chr1	6767385	6767535	chr1	6767385	6767433	chr1-6767060:6767280	chr1	6767060	6767280	chr1
chr1	6795422	6795811	0.274527629233511	0.165341408175459	0.313846153846154	0.0571895424836601	0.473929903561307	0.333220965268028	13	0.000469580661115245	HyperHigh	*	*	*	InterGenic	*	*	*	*	*	*	*	*	*	*	*	*	*	0	0	*	*	*	*	*	0	0	chr1-6795525:6796155	chr1	6795525	6796155	chr1	6795525	6795811	chr1-6795630:6795914	chr1	6795630	6795914	chr1
chr1	6972562	6973019	0.504166666666667	-0.273877142214761	0.935222672064777	0.44375	0.242743002721138	0.524373437530048	11	0.000173637033920152	HyperLow	chr1	6885271	7151363	Intron3	+	CAMTA1	protein_coding	chr1	6972562	6973019	1	0.00171745110713588	*	*	*	*	*	0	0	*	*	*	*	*	0	0	chr1-6972980:6973235	chr1	6972980	6973235	chr1	6972980	6973019	chr1-6972799:6973179	chr1	6972799	6973179	chr1
chr1	7104138	7105205	-0.107868937048503	0.278577409389077	0.824074074074074	0.92875	0.472148460254029	0.301879687409855	25	0.0241204325031492	HypoHigh	chr1	6885271	7151363	Intron3	+	CAMTA1	protein_coding	chr1	7104138	7105205	1	0.00400989131578552	*	*	*	*	*	0	0	*	*	*	*	*	0	0	chr1-7105105:7105455	chr1	7105105	7105455	chr1	7105105	7105205	*	*	*	*	*
chr1	7209433	7210082	0.146428571428572	-0.257742782841639	1	0.837719298245614	0.288262326418938	0.475742449659125	17	0.00218614307997691	HypoLow	chr1	7151432	7309550	Intron4	+	CAMTA1	protein_coding	chr1	7209433	7210082	1	0.00410452952857992	*	*	*	*	*	0	0	*	*	*	*	*	0	0	chr1-7209505:7210075	chr1	7209505	7210075	chr1	7209505	7210075	chr1-7209610:7210106	chr1	7209610	7210106	chr1
chr1	7630421	7632688	0.114285714285714	-0.270426041486378	0.9375	0.823529411764706	0.167752778258549	0.453654682481227	18	0.0386529707241143	HypoLow	chr1	7527962	7700459	Intron6	+	CAMTA1	protein_coding	chr1	7630421	7632688	1	0.0131422575465081	*	*	*	*	*	0	0	*	*	*	*	*	0	0	chr1-7632660:7633255	chr1	7632660	7633255	chr1	7632660	7632688	chr1-7632685:7633129	chr1	7632685	7633129	chr1
chr1	7692156	7692736	0.4	0.28862109793231	0.434782608695652	0.0526315789473684	0.550007473882785	0.181188147733199	16	0.000259635412580655	HyperHigh	chr1	7527962	7700459	Intron6	+	CAMTA1	protein_coding	chr1	7692156	7692736	1	0.00336237731670696	*	*	*	*	*	0	0	*	*	*	*	*	0	0	chr1-7692685:7693130	chr1	7692685	7693130	chr1	7692685	7692736	chr1-7692609:7693169	chr1	7692609	7693169	chr1
chr1	8935255	8937133	-0.176269841269841	-0.22119975099478	0.108187134502924	0.4	0.294313418979844	0.493786185244164	27	0.0231971804801349	HypoLow	chr1	8934977	8938638	Intron1	-	ENO1	protein_coding	chr1	8935255	8937133	1	0.512974597104616	*	*	*	*	*	0	0	*	*	*	*	*	0	0	chr1-8936840:8937150	chr1	8936840	8937150	chr1	8936840	8937133	chr1-8936933:8937513	chr1	8936933	8937513	chr1
chr1	8935255	8937133	-0.176269841269841	-0.22119975099478	0.108187134502924	0.4	0.294313418979844	0.493786185244164	27	0.0231971804801349	HypoLow	chr1	8935847	8936090	LastExon	-	ENO1-IT1	sense_intronic	chr1	8935847	8936090	0.129392971246006	1	*	*	*	*	*	0	0	*	*	*	*	*	0	0	chr1-8935340:8935990	chr1	8935340	8935990	chr1	8935847	8935990	chr1-8935994:8938463	chr1	8935994	8938463	chr1
chr1	8935255	8937133	-0.176269841269841	-0.22119975099478	0.108187134502924	0.4	0.294313418979844	0.493786185244164	27	0.0231971804801349	HypoLow	chr1	8936091	8937566	Intron1	-	ENO1-IT1	sense_intronic	chr1	8936091	8937133	0.554845580404686	0.706440677966102	*	*	*	*	*	0	0	*	*	*	*	*	0	0	chr1-8936840:8937150	chr1	8936840	8937150	chr1	8936840	8937133	chr1-8936933:8937513	chr1	8936933	8937513	chr1
chr1	9139305	9142368	0.190340909090909	-0.200894247956498	0.914855072463769	0.707142857142857	0.26147949075412	0.534422944533381	39	8.89780891949649e-09	HypoLow	*	*	*	InterGenic	*	*	*	*	*	*	*	*	*	*	*	*	*	0	0	*	*	*	*	*	0	0	chr1-9140480:9141375	chr1	9140480	9141375	chr1	9140480	9141375	chr1-9142203:9142723	chr1	9142203	9142723	chr1
chr1	9386167	9387824	-0.068306288032454	0.225850296798693	0.891812865497076	0.953463203463204	0.455209717470113	0.178995086838367	29	0.00145612443454917	HypoHigh	chr1	9353131	9415801	Intron1	+	SPSB1	protein_coding	chr1	9386167	9387824	1	0.0264400829743099	*	*	*	*	*	0	0	*	*	*	*	*	0	0	chr1-9387620:9387970	chr1	9387620	9387970	chr1	9387620	9387824	chr1-9387693:9388137	chr1	9387693	9388137	chr1
chr1	9714984	9715777	0.312865497076023	0.217551586800059	0.5	0.166666666666667	0.554832593066821	0.307309364962454	14	0.00290690900430359	HyperHigh	chr1	9711861	9751524	Intron1	+	PIK3CD	protein_coding	chr1	9714984	9715777	1	0.0199934447722058	*	*	*	*	*	0	0	*	*	*	*	*	0	0	chr1-9715140:9715735	chr1	9715140	9715735	chr1	9715140	9715735	chr1-9715736:9716136	chr1	9715736	9716136	chr1
chr1	9714984	9715777	0.312865497076023	0.217551586800059	0.5	0.166666666666667	0.554832593066821	0.307309364962454	14	0.00290690900430359	HyperHigh	chr1	9714645	9715645	Promoter	-	C1orf200	protein_coding	chr1	9714984	9715645	0.833543505674653	0.661	*	*	*	*	*	0	0	*	*	*	*	*	0	0	chr1-9715140:9715735	chr1	9715140	9715735	chr1	9715140	9715645	chr1-9715551:9715835	chr1	9715551	9715835	chr1
chr1	9760423	9762208	0.0903820816864295	-0.253569677771221	0.954451345755694	0.878676470588236	0.134176735655481	0.372651822252591	35	6.2159312971226e-05	HypoLow	chr1	9751630	9770481	Intron2	+	PIK3CD	protein_coding	chr1	9760423	9762208	1	0.0946899368733754	*	*	*	*	*	0	0	chr1:9760502-9760837	chr1	9760502	9760837	chr1	9760502	9760837	chr1-9761805:9762030	chr1	9761805	9762030	chr1	9761805	9762030	chr1-9762203:9762803	chr1	9762203	9762803	chr1
chr1	9788623	9789069	0.512280701754386	-0.280982089891815	0.90625	0.32	0.281702138375826	0.539063190864238	12	0.000303147208133998	HyperLow	chr1	9786967	9788977	LastExon	+	PIK3CD	protein_coding	chr1	9788623	9788977	0.79372197309417	0.176119402985075	*	*	*	*	*	0	0	*	*	*	*	*	0	0	chr1-9788545:9789030	chr1	9788545	9789030	chr1	9788623	9788977	chr1-9788594:9788862	chr1	9788594	9788862	chr1
chr1	10124913	10126700	0.214285714285714	-0.110588305486364	0.888888888888889	0.583333333333333	0.444957589191678	0.60894151960604	21	0.00827882517258832	HyperLow	chr1	10093753	10132085	Intron1	+	UBE4B	protein_coding	chr1	10124913	10126700	1	0.0466190128352291	*	*	*	*	*	0	0	*	*	*	*	*	0	0	chr1-10126545:10126695	chr1	10126545	10126695	chr1	10126545	10126695	chr1-10126551:10126947	chr1	10126551	10126947	chr1
chr1	10698607	10699022	0.423076923076923	-0.229549716148093	0.92	0.434782608695652	0.307309364962454	0.523650198151556	12	0.00143979191734019	HyperLow	chr1	10696661	10700116	LastExon	-	CASZ1	protein_coding	chr1	10698607	10699022	1	0.120115774240232	CpG: 48	chr1	10698299	10698910	chr1	10698607	10698910	*	*	*	*	*	0	0	chr1-10698260:10701995	chr1	10698260	10701995	chr1	10698607	10699022	chr1-10698907:10699867	chr1	10698907	10699867	chr1
chr1	10698607	10699022	0.423076923076923	-0.229549716148093	0.92	0.434782608695652	0.307309364962454	0.523650198151556	12	0.00143979191734019	HyperLow	chr1	10698297	10699297	Promoter	+	RP4-734G22.3	antisense	chr1	10698607	10699022	1	0.415	CpG: 48	chr1	10698299	10698910	chr1	10698607	10698910	*	*	*	*	*	0	0	chr1-10698260:10701995	chr1	10698260	10701995	chr1	10698607	10699022	chr1-10698907:10699867	chr1	10698907	10699867	chr1
chr1	10776193	10776636	0.222222222222222	0.274888489802526	0.384615384615385	0	0.486382639009082	0.240642698295787	10	0.0401464433341954	HyperHigh	chr1	10765602	10820757	Intron2	-	CASZ1	protein_coding	chr1	10776193	10776636	1	0.00803191007161635	*	*	*	*	*	0	0	*	*	*	*	*	0	0	chr1-10776185:10777175	chr1	10776185	10777175	chr1	10776193	10776636	*	*	*	*	*
chr1	10796743	10797104	-0.252100840336135	0.250905092993235	0.473684210526316	0.666666666666667	0.723650198151556	0.486382639009082	12	0.0354603195964706	HypoHigh	chr1	10765602	10820757	Intron2	-	CASZ1	protein_coding	chr1	10796743	10797104	1	0.00654519082585441	*	*	*	*	*	0	0	*	*	*	*	*	0	0	chr1-10796705:10797275	chr1	10796705	10797275	chr1	10796743	10797104	chr1-10796838:10797094	chr1	10796838	10797094	chr1
chr1	10864381	10864694	-0.41106719367589	-0.339556586703905	0.0434782608695652	0.478260869565217	0.181188147733199	0.589617945872	10	0.000657601895614934	HypoLow	*	*	*	InterGenic	*	*	*	*	*	*	*	*	*	*	*	*	*	0	0	chr1:10864514-10864918	chr1	10864514	10864918	chr1	10864514	10864694	chr1-10864385:10864715	chr1	10864385	10864715	chr1	10864385	10864694	chr1-10864650:10864933	chr1	10864650	10864933	chr1
chr1	10888185	10888466	0.229166666666667	-0.164743350847141	0.894736842105263	0.666666666666667	0.270426041486378	0.507309364962454	10	0.0372843466460964	HyperLow	*	*	*	InterGenic	*	*	*	*	*	*	*	*	*	*	*	*	*	0	0	*	*	*	*	*	0	0	chr1-10888405:10888695	chr1	10888405	10888695	chr1	10888405	10888466	chr1-10888380:10888836	chr1	10888380	10888836	chr1
chr1	10977092	10977552	-0.37012987012987	-0.010893888792735	0.28	0.692307692307692	0.408131481801995	0.365265085000311	12	0.000394084759409837	HypoHigh	*	*	*	InterGenic	*	*	*	*	*	*	*	*	*	*	*	*	*	0	0	*	*	*	*	*	0	0	chr1-10977540:10977690	chr1	10977540	10977690	chr1	10977540	10977552	chr1-10977501:10977951	chr1	10977501	10977951	chr1
chr1	11789380	11790285	0.272727272727273	0.12959604627702	0.526315789473684	0.2	0.557635198440019	0.45698353148489	20	0.0124873293101699	HyperHigh	*	*	*	InterGenic	*	*	*	*	*	*	*	*	*	*	*	*	*	0	0	*	*	*	*	*	0	0	chr1-11789720:11790435	chr1	11789720	11790435	chr1	11789720	11790285	chr1-11790215:11790611	chr1	11790215	11790611	chr1
chr1	11862386	11865351	0.241071428571429	-0.306098611351497	0.956521739130435	0.666666666666667	0.254734835502873	0.563130582247696	48	3.9071788986642e-10	HyperLow	chr1	11861457	11862937	Intron2	-	MTHFR	protein_coding	chr1	11862386	11862937	0.185834738617201	0.372297297297297	*	*	*	*	*	0	0	*	*	*	*	*	0	0	chr1-11862565:11863075	chr1	11862565	11863075	chr1	11862565	11862937	chr1-11862915:11863311	chr1	11862915	11863311	chr1
chr1	11862386	11865351	0.241071428571429	-0.306098611351497	0.956521739130435	0.666666666666667	0.254734835502873	0.563130582247696	48	3.9071788986642e-10	HyperLow	chr1	11862938	11863186	Exon2	-	MTHFR	protein_coding	chr1	11862938	11863186	0.0836424957841484	1	*	*	*	*	*	0	0	*	*	*	*	*	0	0	chr1-11863105:11863495	chr1	11863105	11863495	chr1	11863105	11863186	chr1-11863183:11863779	chr1	11863183	11863779	chr1
chr1	11862386	11865351	0.241071428571429	-0.306098611351497	0.956521739130435	0.666666666666667	0.254734835502873	0.563130582247696	48	3.9071788986642e-10	HyperLow	chr1	11863187	11865944	Intron1	-	MTHFR	protein_coding	chr1	11863187	11865351	0.729848229342327	0.784911135291984	*	*	*	*	*	0	0	*	*	*	*	*	0	0	chr1-11864865:11865315	chr1	11864865	11865315	chr1	11864865	11865315	chr1-11865341:11865701	chr1	11865341	11865701	chr1
chr1	11862386	11865351	0.241071428571429	-0.306098611351497	0.956521739130435	0.666666666666667	0.254734835502873	0.563130582247696	48	3.9071788986642e-10	HyperLow	chr1	11865267	11866267	Promoter	+	CLCN6	protein_coding	chr1	11865267	11865351	0.0283305227655987	0.084	*	*	*	*	*	0	0	*	*	*	*	*	0	0	chr1-11864865:11865315	chr1	11864865	11865315	chr1	11865267	11865315	chr1-11865341:11865701	chr1	11865341	11865701	chr1
chr1	12107322	12108003	-0.15047619047619	-0.274117818494729	0.0869565217391304	0.222222222222222	0.287706856188877	0.583333333333333	16	0.0325341392156427	HypoLow	*	*	*	InterGenic	*	*	*	*	*	*	*	*	*	*	*	*	*	0	0	*	*	*	*	*	0	0	chr1-12107960:12108115	chr1	12107960	12108115	chr1	12107960	12108003	chr1-12107794:12108114	chr1	12107794	12108114	chr1
chr1	12123723	12124423	0.142857142857143	0.359453746190592	0.214285714285714	0.0625	0.586591865651796	0.293763633076898	20	0.00329104613688987	HypoHigh	chr1	12123719	12144520	Intron1	+	TNFRSF8	protein_coding	chr1	12123723	12124423	1	0.0336522282582568	CpG: 63	chr1	12123488	12124148	chr1	12123723	12124148	*	*	*	*	*	0	0	chr1-12124385:12124535	chr1	12124385	12124535	chr1	12124385	12124423	chr1-12124215:12124949	chr1	12124215	12124949	chr1
chr1	12142743	12146110	0.066666666666667	-0.23593663320997	1	0.894736842105263	0.11778644500714	0.402506249879807	46	1.60914302041507e-07	HypoLow	chr1	12123719	12144520	Intron1	+	TNFRSF8	protein_coding	chr1	12142743	12144520	0.527769527769528	0.0854285851641748	*	*	*	*	*	0	0	*	*	*	*	*	0	0	chr1-12144305:12144535	chr1	12144305	12144535	chr1	12144305	12144520	chr1-12144283:12145047	chr1	12144283	12145047	chr1
chr1	12142743	12146110	0.066666666666667	-0.23593663320997	1	0.894736842105263	0.11778644500714	0.402506249879807	46	1.60914302041507e-07	HypoLow	chr1	12144521	12144608	Exon2	+	TNFRSF8	protein_coding	chr1	12144521	12144608	0.0258390258390258	1	*	*	*	*	*	0	0	*	*	*	*	*	0	0	chr1-12144305:12144535	chr1	12144305	12144535	chr1	12144521	12144535	chr1-12144283:12145047	chr1	12144283	12145047	chr1
chr1	12142743	12146110	0.066666666666667	-0.23593663320997	1	0.894736842105263	0.11778644500714	0.402506249879807	46	1.60914302041507e-07	HypoLow	chr1	12144609	12157157	Intron2	+	TNFRSF8	protein_coding	chr1	12144609	12146110	0.445797445797446	0.119620656678355	*	*	*	*	*	0	0	*	*	*	*	*	0	0	chr1-12145585:12146215	chr1	12145585	12146215	chr1	12145585	12146110	chr1-12146035:12146239	chr1	12146035	12146239	chr1
chr1	12240265	12247058	0.071428571428571	-0.201556460429204	0.948684210526316	0.811011904761905	0.211567436054519	0.459594497828725	91	5.23413784588171e-05	HypoLow	chr1	12227227	12248852	Intron1	+	TNFRSF1B	protein_coding	chr1	12240265	12247058	1	0.314127167630058	*	*	*	*	*	0	0	chr1:12245348-12245387	chr1	12245348	12245387	chr1	12245348	12245387	chr1-12246625:12246935	chr1	12246625	12246935	chr1	12246625	12246935	chr1-12246814:12247070	chr1	12246814	12247070	chr1
chr1	12465664	12468118	0.214285714285714	-0.292185943710996	0.956521739130435	0.785714285714286	0.216674140549451	0.507309364962454	24	0.00191708631184868	HyperLow	chr1	12464027	12475139	Intron63	+	VPS13D	protein_coding	chr1	12465664	12468118	1	0.220842332613391	*	*	*	*	*	0	0	*	*	*	*	*	0	0	chr1-12468000:12468270	chr1	12468000	12468270	chr1	12468000	12468118	chr1-12468101:12468445	chr1	12468101	12468445	chr1
chr1	12595083	12601293	0.149560117302053	-0.266093758684913	0.967741935483871	0.818181818181818	0.197224259527442	0.5	70	7.03018287976085e-14	HypoLow	*	*	*	InterGenic	*	*	*	*	*	*	*	*	CpG: 18	chr1	12600347	12600556	chr1	12600347	12600556	chr1:12600525-12600853	chr1	12600525	12600853	chr1	12600525	12600853	chr1-12601205:12602015	chr1	12601205	12602015	chr1	12601205	12601293	chr1-12601287:12602523	chr1	12601287	12602523	chr1
chr1	12694286	12694544	-0.430942316860003	-0.142359920145348	0.111724137931035	0.553605313092979	0.282996664590953	0.378095642263573	9	0.000155400155400155	HypoLow	*	*	*	InterGenic	*	*	*	*	*	*	*	*	*	*	*	*	*	0	0	*	*	*	*	*	0	0	chr1-12694180:12694490	chr1	12694180	12694490	chr1	12694286	12694490	chr1-12694131:12694601	chr1	12694131	12694601	chr1
chr1	12798829	12805061	0.061781609195402	-0.218368872787759	0.958333333333333	0.88	0.240642698295787	0.474598313565133	74	1.75455299600031e-05	HypoLow	*	*	*	InterGenic	*	*	*	*	*	*	*	*	*	*	*	*	*	0	0	*	*	*	*	*	0	0	chr1-12803165:12803315	chr1	12803165	12803315	chr1	12803165	12803315	chr1-12805057:12805660	chr1	12805057	12805660	chr1
chr1	13783452	13785624	-0.107142857142857	0.259783279097362	0.862068965517241	1	0.45698353148489	0.240642698295787	32	0.0124616268340824	HypoHigh	*	*	*	InterGenic	*	*	*	*	*	*	*	*	*	*	*	*	*	0	0	*	*	*	*	*	0	0	chr1-13785460:13785610	chr1	13785460	13785610	chr1	13785460	13785610	chr1-13785580:13785956	chr1	13785580	13785956	chr1
chr1	13988042	13990152	0.065972222222222	-0.212204915240942	0.933684210526316	0.852870813397129	0.292724709612786	0.453830116035437	23	0.0659369789160551	HypoLow	*	*	*	InterGenic	*	*	*	*	*	*	*	*	*	*	*	*	*	0	0	*	*	*	*	*	0	0	chr1-13988925:13989290	chr1	13988925	13989290	chr1	13988925	13989290	chr1-13989286:13989666	chr1	13989286	13989666	chr1
chr1	14027369	14027847	-0.214015151515151	-0.0216353455246345	0.310096153846154	0.571070234113712	0.505106510371594	0.507289323477627	13	0.00451305324101124	HypoHigh	chr1	14026796	14042035	Intron1	+	PRDM2	protein_coding	chr1	14027369	14027847	1	0.0313668875910493	*	*	*	*	*	0	0	*	*	*	*	*	0	0	chr1-14027820:14028270	chr1	14027820	14028270	chr1	14027820	14027847	chr1-14027822:14028212	chr1	14027822	14028212	chr1
chr1	14027906	14032033	0.0773631402922025	-0.2243126455106	0.951190476190476	0.872282608695652	0.142218972870857	0.397579266037014	41	0.000435902974231959	HypoLow	chr1	14026796	14042035	Intron1	+	PRDM2	protein_coding	chr1	14027906	14032033	1	0.270818295163725	*	*	*	*	*	0	0	chr1:14029077-14029879	chr1	14029077	14029879	chr1	14029077	14029879	chr1-14031000:14031210	chr1	14031000	14031210	chr1	14031000	14031210	chr1-14031847:14032667	chr1	14031847	14032667	chr1
chr1	14226200	14227637	-0.130952380952381	0.270426041486378	0.764705882352941	0.928571428571429	0.5	0.181188147733199	16	0.0207730110581686	HypoHigh	*	*	*	InterGenic	*	*	*	*	*	*	*	*	*	*	*	*	*	0	0	*	*	*	*	*	0	0	chr1-14227620:14227910	chr1	14227620	14227910	chr1	14227620	14227637	chr1-14227441:14227811	chr1	14227441	14227811	chr1
chr1	14646727	14647860	-0.33625	-0.154352703893188	0.0819397993311037	0.535714285714285	0.398419052582124	0.537588661791255	9	0.0135184698402608	HypoLow	*	*	*	InterGenic	*	*	*	*	*	*	*	*	*	*	*	*	*	0	0	*	*	*	*	*	0	0	chr1-14647580:14647830	chr1	14647580	14647830	chr1	14647580	14647830	chr1-14647654:14647954	chr1	14647654	14647954	chr1
chr1	14768369	14774196	0.0734326625386996	-0.270426041486378	1	0.866666666666667	0.174470462995874	0.451536587088523	63	8.61647147850272e-05	HypoLow	*	*	*	InterGenic	*	*	*	*	*	*	*	*	*	*	*	*	*	0	0	*	*	*	*	*	0	0	chr1-14774065:14774215	chr1	14774065	14774215	chr1	14774065	14774196	chr1-14770131:14770733	chr1	14770131	14770733	chr1
chr1	14936282	14939773	0.129166666666666	-0.253696015772765	0.949874686716792	0.8	0.270426041486378	0.552580908834963	31	4.58334246834944e-05	HypoLow	chr1	14925720	15287179	Intron1	+	KAZN	protein_coding	chr1	14936282	14939773	1	0.00965808016953513	*	*	*	*	*	0	0	*	*	*	*	*	0	0	chr1-14938905:14939055	chr1	14938905	14939055	chr1	14938905	14939055	chr1-14938682:14939138	chr1	14938682	14939138	chr1
chr1	15103355	15104164	-0.464102564102564	0.240711547088208	0.380952380952381	0.842105263157895	0.674193253947497	0.450676700585984	20	3.66737245986565e-06	HypoHigh	chr1	14925720	15287179	Intron1	+	KAZN	protein_coding	chr1	15103355	15104164	1	0.00223815149159379	*	*	*	*	*	0	0	*	*	*	*	*	0	0	chr1-15103785:15104655	chr1	15103785	15104655	chr1	15103785	15104164	chr1-15104123:15104473	chr1	15104123	15104473	chr1
chr1	15196085	15199541	0.0908119658119655	-0.223519785942386	0.935416666666667	0.811011904761905	0.306703988156976	0.553707028650468	31	0.00190318663808339	HypoLow	chr1	14925720	15287179	Intron1	+	KAZN	protein_coding	chr1	15196085	15199541	1	0.00956125037694455	*	*	*	*	*	0	0	*	*	*	*	*	0	0	chr1-15197665:15197970	chr1	15197665	15197970	chr1	15197665	15197970	chr1-15199329:15199705	chr1	15199329	15199705	chr1
chr1	15402722	15404792	0.0909090909090911	-0.299590839682348	0.96551724137931	0.875	0.15633186452976	0.417209722462608	36	0.000541263348361776	HypoLow	chr1	15392250	15420675	Intron8	+	KAZN	protein_coding	chr1	15402722	15404792	1	0.0728232189973615	*	*	*	*	*	0	0	*	*	*	*	*	0	0	chr1-15404405:15404555	chr1	15404405	15404555	chr1	15404405	15404555	chr1-15403976:15404216	chr1	15403976	15404216	chr1
chr1	15481047	15481465	0.262210338680927	-0.0268287459742275	0.799329501915709	0.279166666666667	0.572305728896233	0.571900307565362	15	0.00416176844498287	HyperHigh	chr1	15479281	15541390	Intron1	+	TMEM51	protein_coding	chr1	15481047	15481465	1	0.0067301035276691	CpG: 197	chr1	15479219	15481471	chr1	15481047	15481465	*	*	*	*	*	0	0	chr1-15480405:15481495	chr1	15480405	15481495	chr1	15481047	15481465	chr1-15481213:15481429	chr1	15481213	15481429	chr1
chr1	15770030	15770992	-0.126925770308123	0.263653950209738	0.815610859728507	0.936538461538462	0.591803449268262	0.371557626226199	11	0.15061967156063	HypoHigh	chr1	15769914	15770050	Exon5	+	CTRC	protein_coding	chr1	15770030	15770050	0.0207900207900208	0.147058823529412	*	*	*	*	*	0	0	*	*	*	*	*	0	0	*	*	*	*	*	0	0	chr1-15769858:15770142	chr1	15769858	15770142	chr1
chr1	15770030	15770992	-0.126925770308123	0.263653950209738	0.815610859728507	0.936538461538462	0.591803449268262	0.371557626226199	11	0.15061967156063	HypoHigh	chr1	15770051	15771100	Intron5	+	CTRC	protein_coding	chr1	15770051	15770992	0.978170478170478	0.897044804575787	*	*	*	*	*	0	0	*	*	*	*	*	0	0	chr1-15770960:15771375	chr1	15770960	15771375	chr1	15770960	15770992	chr1-15770986:15771286	chr1	15770986	15771286	chr1
chr1	16275992	16276671	0.226708074534161	0.28709574976532	0.478260869565217	0.142857142857143	0.597493750120193	0.353759374819711	24	0.00467225055430505	HyperHigh	chr1	16274993	16299533	Intron2	-	ZBTB17	protein_coding	chr1	16275992	16276671	1	0.0276691116544417	*	*	*	*	*	0	0	chr1:16276028-16276482	chr1	16276028	16276482	chr1	16276028	16276482	chr1-16276105:16276735	chr1	16276105	16276735	chr1	16276105	16276671	chr1-16276612:16276962	chr1	16276612	16276962	chr1
chr1	16284284	16284967	0.517391304347827	-0.0957872508376041	0.674242424242425	0.369444444444444	0.526761456149471	0.567891692094285	9	0.000898912788114092	HyperHigh	chr1	16274993	16299533	Intron2	-	ZBTB17	protein_coding	chr1	16284284	16284967	1	0.0278321108394458	*	*	*	*	*	0	0	*	*	*	*	*	0	0	chr1-16284685:16284910	chr1	16284685	16284910	chr1	16284685	16284910	chr1-16284566:16284966	chr1	16284566	16284966	chr1
chr1	16553326	16554090	0.136443932411674	-0.21575422532492	0.927083333333333	0.745989304812834	0.354833364346816	0.581756334326217	23	0.0136227150138889	HypoLow	*	*	*	InterGenic	*	*	*	*	*	*	*	*	CpG: 37	chr1	16553326	16553660	chr1	16553326	16553660	chr1:16553276-16553594	chr1	16553276	16553594	chr1	16553326	16553594	chr1-16553345:16553675	chr1	16553345	16553675	chr1	16553345	16553675	chr1-16553908:16554612	chr1	16553908	16554612	chr1
chr1	16554110	16554891	0.308029556650247	0.426365806666476	0.434057971014493	0	0.578936782305895	0.15633186452976	21	2.38560309870982e-05	HyperHigh	*	*	*	InterGenic	*	*	*	*	*	*	*	*	*	*	*	*	*	0	0	*	*	*	*	*	0	0	chr1-16554205:16555155	chr1	16554205	16555155	chr1	16554205	16554891	chr1-16554852:16555328	chr1	16554852	16555328	chr1
chr1	16604764	16605785	0.306451612903226	-0.157996019280707	0.85	0.578947368421053	0.424018402958067	0.630353704024218	20	0.00145795839075869	HyperLow	chr1	16583255	16621277	Intron4	-	FBXO42	protein_coding	chr1	16604764	16605785	1	0.0268528746515175	*	*	*	*	*	0	0	*	*	*	*	*	0	0	chr1-16605780:16606150	chr1	16605780	16606150	chr1	16605780	16605785	chr1-16605726:16606106	chr1	16605726	16606106	chr1
chr1	16847280	16847862	0.247160682454801	-0.147384780893377	0.78235294117647	0.5	0.467605816829431	0.491710461180406	21	0.00681461262576101	HyperLow	chr1	16847189	16847282	FirstExon	+	RP4-798A10.4	lincRNA	chr1	16847280	16847282	0.00343642611683849	0.021505376344086	CpG: 42	chr1	16847280	16847892	chr1	16847280	16847282	*	*	*	*	*	0	0	chr1-16846900:16847555	chr1	16846900	16847555	chr1	16847280	16847282	chr1-16847134:16847914	chr1	16847134	16847914	chr1
chr1	16847280	16847862	0.247160682454801	-0.147384780893377	0.78235294117647	0.5	0.467605816829431	0.491710461180406	21	0.00681461262576101	HyperLow	chr1	16847283	16848058	Intron1	+	RP4-798A10.4	lincRNA	chr1	16847283	16847862	0.994845360824742	0.747096774193548	CpG: 42	chr1	16847280	16847892	chr1	16847283	16847862	*	*	*	*	*	0	0	chr1-16847765:16847935	chr1	16847765	16847935	chr1	16847765	16847862	chr1-16847383:16847793	chr1	16847383	16847793	chr1
chr1	17305202	17305703	0.231313131313131	0.219632424905053	0.525	0.226923076923077	0.721098276114039	0.297038119818967	9	0.082983682983683	HyperHigh	chr1	17304810	17307081	Intron1	-	MFAP2	protein_coding	chr1	17305202	17305703	1	0.220607661822985	*	*	*	*	*	0	0	*	*	*	*	*	0	0	chr1-17305200:17306975	chr1	17305200	17306975	chr1	17305202	17305703	chr1-17305392:17305550	chr1	17305392	17305550	chr1
chr1	17305202	17305703	0.231313131313131	0.219632424905053	0.525	0.226923076923077	0.721098276114039	0.297038119818967	9	0.082983682983683	HyperHigh	chr1	17304420	17305420	Promoter	+	RP1-37C10.3	antisense	chr1	17305202	17305420	0.435129740518962	0.218	*	*	*	*	*	0	0	*	*	*	*	*	0	0	chr1-17305200:17306975	chr1	17305200	17306975	chr1	17305202	17305420	chr1-17305392:17305550	chr1	17305392	17305550	chr1
chr1	17305202	17305703	0.231313131313131	0.219632424905053	0.525	0.226923076923077	0.721098276114039	0.297038119818967	9	0.082983682983683	HyperHigh	chr1	17305421	17305607	FirstExon	+	RP1-37C10.3	antisense	chr1	17305421	17305607	0.37125748502994	1	*	*	*	*	*	0	0	*	*	*	*	*	0	0	chr1-17305200:17306975	chr1	17305200	17306975	chr1	17305421	17305607	chr1-17305392:17305550	chr1	17305392	17305550	chr1
chr1	17305202	17305703	0.231313131313131	0.219632424905053	0.525	0.226923076923077	0.721098276114039	0.297038119818967	9	0.082983682983683	HyperHigh	chr1	17305608	17331137	Intron1	+	RP1-37C10.3	antisense	chr1	17305608	17305703	0.189620758483034	0.0037212581769752	*	*	*	*	*	0	0	*	*	*	*	*	0	0	chr1-17305200:17306975	chr1	17305200	17306975	chr1	17305608	17305703	chr1-17305130:17305732	chr1	17305130	17305732	chr1
chr1	17591716	17595365	0.08695652173913	-0.230981230314084	0.962962962962963	0.9	0.189665197863094	0.450548038384464	38	6.71355908269277e-05	HypoLow	chr1	17588701	17592153	Intron3	+	PADI3	protein_coding	chr1	17591716	17592153	0.119758838037819	0.126593279258401	*	*	*	*	*	0	0	*	*	*	*	*	0	0	chr1-17591740:17592155	chr1	17591740	17592155	chr1	17591740	17592153	chr1-17592092:17592772	chr1	17592092	17592772	chr1
chr1	17591716	17595365	0.08695652173913	-0.230981230314084	0.962962962962963	0.9	0.189665197863094	0.450548038384464	38	6.71355908269277e-05	HypoLow	chr1	17592154	17592215	Exon4	+	PADI3	protein_coding	chr1	17592154	17592215	0.0167169087421211	1	*	*	*	*	*	0	0	*	*	*	*	*	0	0	chr1-17591740:17592155	chr1	17591740	17592155	chr1	17592154	17592155	chr1-17592092:17592772	chr1	17592092	17592772	chr1
chr1	17591716	17595365	0.08695652173913	-0.230981230314084	0.962962962962963	0.9	0.189665197863094	0.450548038384464	38	6.71355908269277e-05	HypoLow	chr1	17592216	17593213	Intron4	+	PADI3	protein_coding	chr1	17592216	17593213	0.273225541244176	1	*	*	*	*	*	0	0	*	*	*	*	*	0	0	chr1-17592925:17593075	chr1	17592925	17593075	chr1	17592925	17593075	chr1-17592306:17592999	chr1	17592306	17592999	chr1
chr1	17591716	17595365	0.08695652173913	-0.230981230314084	0.962962962962963	0.9	0.189665197863094	0.450548038384464	38	6.71355908269277e-05	HypoLow	chr1	17593214	17593331	Exon5	+	PADI3	protein_coding	chr1	17593214	17593331	0.0320635790627569	1	*	*	*	*	*	0	0	*	*	*	*	*	0	0	chr1-17593225:17593515	chr1	17593225	17593515	chr1	17593225	17593331	*	*	*	*	*
chr1	17591716	17595365	0.08695652173913	-0.230981230314084	0.962962962962963	0.9	0.189665197863094	0.450548038384464	38	6.71355908269277e-05	HypoLow	chr1	17593332	17594331	Intron5	+	PADI3	protein_coding	chr1	17593332	17594331	0.273773636612771	1	*	*	*	*	*	0	0	*	*	*	*	*	0	0	chr1-17594305:17594635	chr1	17594305	17594635	chr1	17594305	17594331	*	*	*	*	*
chr1	17591716	17595365	0.08695652173913	-0.230981230314084	0.962962962962963	0.9	0.189665197863094	0.450548038384464	38	6.71355908269277e-05	HypoLow	chr1	17594332	17594457	Exon6	+	PADI3	protein_coding	chr1	17594332	17594457	0.0342559605371335	1	*	*	*	*	*	0	0	*	*	*	*	*	0	0	chr1-17594305:17594635	chr1	17594305	17594635	chr1	17594332	17594457	*	*	*	*	*
chr1	17591716	17595365	0.08695652173913	-0.230981230314084	0.962962962962963	0.9	0.189665197863094	0.450548038384464	38	6.71355908269277e-05	HypoLow	chr1	17594458	17596727	Intron6	+	PADI3	protein_coding	chr1	17594458	17595365	0.24856124965744	0.399735566328779	*	*	*	*	*	0	0	*	*	*	*	*	0	0	chr1-17594305:17594635	chr1	17594305	17594635	chr1	17594458	17594635	*	*	*	*	*
chr1	17674792	17681553	0.06875	-0.240642698295787	1	0.894444444444444	0	0.315479781557005	73	8.86228748313873e-06	HypoLow	chr1	17674544	17681027	Intron10	+	PADI4	protein_coding	chr1	17674792	17681027	0.922200857861263	0.961746105198211	*	*	*	*	*	0	0	*	*	*	*	*	0	0	chr1-17680765:17681295	chr1	17680765	17681295	chr1	17680765	17681027	chr1-17680020:17680250	chr1	17680020	17680250	chr1
chr1	17674792	17681553	0.06875	-0.240642698295787	1	0.894444444444444	0	0.315479781557005	73	8.86228748313873e-06	HypoLow	chr1	17681028	17681182	Exon11	+	PADI4	protein_coding	chr1	17681028	17681182	0.0227776956071587	1	*	*	*	*	*	0	0	*	*	*	*	*	0	0	chr1-17680765:17681295	chr1	17680765	17681295	chr1	17681028	17681182	*	*	*	*	*
chr1	17674792	17681553	0.06875	-0.240642698295787	1	0.894444444444444	0	0.315479781557005	73	8.86228748313873e-06	HypoLow	chr1	17681183	17682477	Intron11	+	PADI4	protein_coding	chr1	17681183	17681553	0.0547256323029138	0.285935085007728	*	*	*	*	*	0	0	*	*	*	*	*	0	0	chr1-17681385:17681535	chr1	17681385	17681535	chr1	17681385	17681535	chr1-17681543:17681777	chr1	17681543	17681777	chr1
chr1	17746367	17746654	0.289560439560439	0.482711832136097	0.49074074074074	0.121153846153846	0.727474885748447	0.309939524505497	9	0.0154851548988765	HyperHigh	chr1	17743143	17747209	Intron7	-	RCC2	protein_coding	chr1	17746367	17746654	1	0.0705853418593212	CpG: 30	chr1	17746200	17746547	chr1	17746367	17746547	chr1:17746173-17746585	chr1	17746173	17746585	chr1	17746367	17746585	chr1-17746380:17746835	chr1	17746380	17746835	chr1	17746380	17746654	chr1-17746496:17747184	chr1	17746496	17747184	chr1
chr1	17766768	17767677	0.349206349206349	-0.249999999999999	0.933333333333333	0.5	0.307309364962454	0.520426041486377	18	0.000243503913789752	HyperLow	chr1	17766221	17767221	Promoter	-	RCC2	protein_coding	chr1	17766768	17767221	0.498349834983498	0.453	*	*	*	*	*	0	0	*	*	*	*	*	0	0	chr1-17766900:17767655	chr1	17766900	17767655	chr1	17766900	17767221	chr1-17767210:17767690	chr1	17767210	17767690	chr1
chr1	17769817	17770370	-0.47635265700483	0.0433828081073185	0.435869565217392	0.912222222222222	0.447208749841447	0.348972276350505	9	0.00525002907542027	HypoHigh	*	*	*	InterGenic	*	*	*	*	*	*	*	*	*	*	*	*	*	0	0	*	*	*	*	*	0	0	chr1-17769960:17770375	chr1	17769960	17770375	chr1	17769960	17770370	chr1-17769983:17770287	chr1	17769983	17770287	chr1
chr1	18005975	18007207	-0.0892037786774629	0.200647251910363	0.84412955465587	0.923076923076923	0.424515168604358	0.271327868795692	25	0.13025595330966	HypoHigh	chr1	17991091	18014067	Intron26	+	ARHGEF10L	protein_coding	chr1	18005975	18007207	1	0.0536211699164345	*	*	*	*	*	0	0	*	*	*	*	*	0	0	chr1-18006585:18007255	chr1	18006585	18007255	chr1	18006585	18007207	chr1-18006910:18007330	chr1	18006910	18007330	chr1
chr1	18116677	18117784	0.080305010893246	0.257924743854002	0.836666666666666	0.811764705882353	0.454561898249766	0.329928993085604	13	0.72897788501216	HypoHigh	chr1	18082000	18149479	Intron1	+	ACTL8	protein_coding	chr1	18116677	18117784	1	0.0164051038100742	*	*	*	*	*	0	0	*	*	*	*	*	0	0	chr1-18117600:18117855	chr1	18117600	18117855	chr1	18117600	18117784	chr1-18116859:18117239	chr1	18116859	18117239	chr1
chr1	18239560	18240594	-0.307692307692307	-0.118185894845156	0.32	0.705882352941177	0.608337070274726	0.709361759630465	10	0.0242674870961071	HypoLow	*	*	*	InterGenic	*	*	*	*	*	*	*	*	*	*	*	*	*	0	0	*	*	*	*	*	0	0	chr1-18239860:18240070	chr1	18239860	18240070	chr1	18239860	18240070	chr1-18240548:18240986	chr1	18240548	18240986	chr1
chr1	18470817	18471559	0.111111111111111	-0.30354111469005	0.841666666666667	0.55	0.301879687409855	0.583333333333333	11	0.11214040300651	HypoLow	chr1	18434693	18554391	Intron1	+	IGSF21	protein_coding	chr1	18470817	18471559	1	0.00619893398385938	*	*	*	*	*	0	0	*	*	*	*	*	0	0	chr1-18471520:18471735	chr1	18471520	18471735	chr1	18471520	18471559	*	*	*	*	*
chr1	18615877	18621985	0.1	-0.262370238301283	0.944444444444444	0.842105263157895	0.270426041486378	0.516264980231799	94	5.02605553228817e-09	HypoLow	chr1	18554505	18618359	Intron2	+	IGSF21	protein_coding	chr1	18615877	18618359	0.406352324819908	0.0388699220095844	*	*	*	*	*	0	0	*	*	*	*	*	0	0	chr1-18618165:18618615	chr1	18618165	18618615	chr1	18618165	18618359	chr1-18617357:18618239	chr1	18617357	18618239	chr1
chr1	18615877	18621985	0.1	-0.262370238301283	0.944444444444444	0.842105263157895	0.270426041486378	0.516264980231799	94	5.02605553228817e-09	HypoLow	chr1	18618360	18618481	Exon3	+	IGSF21	protein_coding	chr1	18618360	18618481	0.0198100851342502	1	*	*	*	*	*	0	0	*	*	*	*	*	0	0	chr1-18618165:18618615	chr1	18618165	18618615	chr1	18618360	18618481	*	*	*	*	*
chr1	18615877	18621985	0.1	-0.262370238301283	0.944444444444444	0.842105263157895	0.270426041486378	0.516264980231799	94	5.02605553228817e-09	HypoLow	chr1	18618482	18661385	Intron3	+	IGSF21	protein_coding	chr1	18618482	18621985	0.573510150622135	0.0816493019136191	*	*	*	*	*	0	0	*	*	*	*	*	0	0	chr1-18621805:18621815	chr1	18621805	18621815	chr1	18621805	18621815	chr1-18621562:18621846	chr1	18621562	18621846	chr1
chr1	18982474	18984044	0.095238095238095	-0.26475679409318	1	0.863636363636364	0	0.450548038384464	26	7.49821050375147e-05	HypoLow	chr1	18962866	19018247	Intron4	+	PAX7	protein_coding	chr1	18982474	18984044	1	0.0283490727866958	*	*	*	*	*	0	0	*	*	*	*	*	0	0	chr1-18983980:18984190	chr1	18983980	18984190	chr1	18983980	18984044	chr1-18983994:18984898	chr1	18983994	18984898	chr1
chr1	19383953	19384537	-0.341269841269841	0.363831852236468	0.398692810457516	0.904166666666667	0.649051522873187	0.153049305675749	7	0.0303479417395604	HypoHigh	*	*	*	InterGenic	*	*	*	*	*	*	*	*	*	*	*	*	*	0	0	*	*	*	*	*	0	0	chr1-19383765:19384915	chr1	19383765	19384915	chr1	19383953	19384537	chr1-19384326:19385057	chr1	19384326	19385057	chr1
chr1	19407869	19408269	0.294736842105263	0.023650198151556	0.764705882352941	0.363636363636364	0.593557376506962	0.5	14	0.0148378007930981	HyperHigh	chr1	19407843	19408067	Exon103	-	UBR4	protein_coding	chr1	19407869	19408067	0.495	0.883928571428571	*	*	*	*	*	0	0	*	*	*	*	*	0	0	*	*	*	*	*	0	0	chr1-19408064:19408504	chr1	19408064	19408504	chr1
chr1	19407869	19408269	0.294736842105263	0.023650198151556	0.764705882352941	0.363636363636364	0.593557376506962	0.5	14	0.0148378007930981	HyperHigh	chr1	19408068	19410997	Intron102	-	UBR4	protein_coding	chr1	19408068	19408269	0.5025	0.0686241037896893	*	*	*	*	*	0	0	*	*	*	*	*	0	0	chr1-19408080:19408315	chr1	19408080	19408315	chr1	19408080	19408269	chr1-19408254:19409219	chr1	19408254	19409219	chr1
chr1	19600405	19600751	0.25	0.323193092392291	0.294117647058824	0	0.49461056894823	0.0807640630274716	12	0.000334958428043442	HyperHigh	chr1	19600355	19600688	FirstExon	-	AKR7L	polymorphic_pseudogene	chr1	19600405	19600688	0.817919075144509	0.84984984984985	CpG: 72	chr1	19600249	19600942	chr1	19600405	19600688	*	*	*	*	*	0	0	chr1-19600445:19601095	chr1	19600445	19601095	chr1	19600445	19600688	chr1-19600614:19601150	chr1	19600614	19601150	chr1
chr1	19600405	19600751	0.25	0.323193092392291	0.294117647058824	0	0.49461056894823	0.0807640630274716	12	0.000334958428043442	HyperHigh	chr1	19600689	19601689	Promoter	-	AKR7L	polymorphic_pseudogene	chr1	19600689	19600751	0.179190751445087	0.062	CpG: 72	chr1	19600249	19600942	chr1	19600689	19600751	*	*	*	*	*	0	0	chr1-19600445:19601095	chr1	19600445	19601095	chr1	19600689	19600751	chr1-19600614:19601150	chr1	19600614	19601150	chr1
chr1	19614850	19615103	0.125	-0.319040720704357	0.967741935483871	0.833333333333333	0.123744108880292	0.516264980231799	12	0.0154561382022665	HypoLow	chr1	19612867	19614989	Intron1	-	AKR7A3	protein_coding	chr1	19614850	19614989	0.549407114624506	0.0655042412818096	*	*	*	*	*	0	0	*	*	*	*	*	0	0	chr1-19614205:19615035	chr1	19614205	19615035	chr1	19614850	19614989	chr1-19614936:19615883	chr1	19614936	19615883	chr1
chr1	19614850	19615103	0.125	-0.319040720704357	0.967741935483871	0.833333333333333	0.123744108880292	0.516264980231799	12	0.0154561382022665	HypoLow	chr1	19614990	19615744	FirstExon	-	AKR7A3	protein_coding	chr1	19614990	19615103	0.446640316205534	0.149867374005305	CpG: 73	chr1	19614998	19615660	chr1	19614998	19615103	*	*	*	*	*	0	0	chr1-19614205:19615035	chr1	19614205	19615035	chr1	19614990	19615035	chr1-19615039:19615979	chr1	19615039	19615979	chr1
chr1	19696836	19697516	0.333333333333333	-0.554832593066821	1	0.65	0	0.554832593066821	12	5.41857035352249e-05	HyperLow	chr1	19684058	19705033	Intron5	-	CAPZB	protein_coding	chr1	19696836	19697516	1	0.032419547079857	*	*	*	*	*	0	0	*	*	*	*	*	0	0	chr1-19697400:19697530	chr1	19697400	19697530	chr1	19697400	19697516	chr1-19696881:19697425	chr1	19696881	19697425	chr1
chr1	20512265	20513401	0.118055555555555	0.244343440107843	0.1425	0.0571895424836601	0.516650882500767	0.288162864337309	31	0.00186935129677493	HypoHigh	chr1	20511118	20512852	Intron1	-	RP3-340N1.5	antisense	chr1	20512265	20512852	0.516725352112676	0.338523644752018	CpG: 36	chr1	20512360	20512797	chr1	20512360	20512797	*	*	*	*	*	0	0	chr1-20512765:20513230	chr1	20512765	20513230	chr1	20512765	20512852	chr1-20512846:20513322	chr1	20512846	20513322	chr1
chr1	20512265	20513401	0.118055555555555	0.244343440107843	0.1425	0.0571895424836601	0.516650882500767	0.288162864337309	31	0.00186935129677493	HypoHigh	chr1	20512853	20512979	FirstExon	-	RP3-340N1.5	antisense	chr1	20512853	20512979	0.110915492957746	1	*	*	*	*	*	0	0	*	*	*	*	*	0	0	chr1-20512765:20513230	chr1	20512765	20513230	chr1	20512853	20512979	chr1-20512961:20513241	chr1	20512961	20513241	chr1
chr1	20512265	20513401	0.118055555555555	0.244343440107843	0.1425	0.0571895424836601	0.516650882500767	0.288162864337309	31	0.00186935129677493	HypoHigh	chr1	20512980	20513980	Promoter	-	RP3-340N1.5	antisense	chr1	20512980	20513401	0.370598591549296	0.421	*	*	*	*	*	0	0	*	*	*	*	*	0	0	chr1-20512765:20513230	chr1	20512765	20513230	chr1	20512980	20513230	chr1-20513072:20513468	chr1	20513072	20513468	chr1
chr1	20512265	20513401	0.118055555555555	0.244343440107843	0.1425	0.0571895424836601	0.516650882500767	0.288162864337309	31	0.00186935129677493	HypoHigh	chr1	20511577	20512577	Promoter	+	UBXN10	protein_coding	chr1	20512265	20512577	0.274647887323944	0.312	CpG: 36	chr1	20512360	20512797	chr1	20512360	20512577	*	*	*	*	*	0	0	chr1-20512225:20512730	chr1	20512225	20512730	chr1	20512265	20512577	chr1-20512551:20513255	chr1	20512551	20513255	chr1
chr1	20512265	20513401	0.118055555555555	0.244343440107843	0.1425	0.0571895424836601	0.516650882500767	0.288162864337309	31	0.00186935129677493	HypoHigh	chr1	20512578	20512646	FirstExon	+	UBXN10	protein_coding	chr1	20512578	20512646	0.0598591549295775	1	CpG: 36	chr1	20512360	20512797	chr1	20512578	20512646	*	*	*	*	*	0	0	chr1-20512225:20512730	chr1	20512225	20512730	chr1	20512578	20512646	chr1-20512610:20513368	chr1	20512610	20513368	chr1
chr1	20512265	20513401	0.118055555555555	0.244343440107843	0.1425	0.0571895424836601	0.516650882500767	0.288162864337309	31	0.00186935129677493	HypoHigh	chr1	20512647	20517039	Intron1	+	UBXN10	protein_coding	chr1	20512647	20513401	0.663732394366197	0.171675774134791	CpG: 36	chr1	20512360	20512797	chr1	20512647	20512797	*	*	*	*	*	0	0	chr1-20512765:20513230	chr1	20512765	20513230	chr1	20512765	20513230	chr1-20513072:20513468	chr1	20513072	20513468	chr1
chr1	20810336	20811757	0.102631578947369	0.219089996780158	0.176923076923077	0.0488095238095238	0.527797894998831	0.274270857924064	51	0.000102639758392734	HypoHigh	chr1	20810213	20811706	Intron1	-	CAMK2N1	protein_coding	chr1	20810336	20811706	0.964109781843772	0.917615539182853	CpG: 245	chr1	20810462	20813511	chr1	20810462	20811706	*	*	*	*	*	0	0	chr1-20810020:20811875	chr1	20810020	20811875	chr1	20810336	20811706	chr1-20811689:20812413	chr1	20811689	20812413	chr1
chr1	20810336	20811757	0.102631578947369	0.219089996780158	0.176923076923077	0.0488095238095238	0.527797894998831	0.274270857924064	51	0.000102639758392734	HypoHigh	chr1	20811707	20812713	FirstExon	-	CAMK2N1	protein_coding	chr1	20811707	20811757	0.0351864883884588	0.0497017892644135	CpG: 245	chr1	20810462	20813511	chr1	20811707	20811757	*	*	*	*	*	0	0	chr1-20810020:20811875	chr1	20810020	20811875	chr1	20811707	20811757	chr1-20811689:20812413	chr1	20811689	20812413	chr1
chr1	21795154	21795711	0.394335511982571	-0.138261451832061	0.892857142857143	0.45	0.363076692947528	0.583333333333333	14	0.000589315160128352	HyperLow	chr1	21795079	21795180	Intron5	+	NBPF3	protein_coding	chr1	21795154	21795180	0.0466786355475763	0.257425742574257	*	*	*	*	*	0	0	*	*	*	*	*	0	0	chr1-21795160:21795415	chr1	21795160	21795415	chr1	21795160	21795180	chr1-21795176:21795466	chr1	21795176	21795466	chr1
chr1	21795154	21795711	0.394335511982571	-0.138261451832061	0.892857142857143	0.45	0.363076692947528	0.583333333333333	14	0.000589315160128352	HyperLow	chr1	21795181	21795390	Exon6	+	NBPF3	protein_coding	chr1	21795181	21795390	0.375224416517056	1	*	*	*	*	*	0	0	*	*	*	*	*	0	0	chr1-21795160:21795415	chr1	21795160	21795415	chr1	21795181	21795390	chr1-21795222:21795598	chr1	21795222	21795598	chr1
chr1	21795154	21795711	0.394335511982571	-0.138261451832061	0.892857142857143	0.45	0.363076692947528	0.583333333333333	14	0.000589315160128352	HyperLow	chr1	21795391	21797124	Intron6	+	NBPF3	protein_coding	chr1	21795391	21795711	0.574506283662478	0.18465089440277	*	*	*	*	*	0	0	*	*	*	*	*	0	0	chr1-21795160:21795415	chr1	21795160	21795415	chr1	21795391	21795415	chr1-21795222:21795598	chr1	21795222	21795598	chr1
chr1	21885262	21885830	-0.34375	-0.416066297549008	0.0487661574618097	0.40625	0.178294640221425	0.593998900573139	15	7.23493366153023e-06	HypoLow	chr1	21880636	21887118	Intron2	+	ALPL	protein_coding	chr1	21885262	21885830	1	0.0876272755322431	*	*	*	*	*	0	0	*	*	*	*	*	0	0	chr1-21885600:21885895	chr1	21885600	21885895	chr1	21885600	21885830	chr1-21885790:21886190	chr1	21885790	21886190	chr1
chr1	21934311	21934566	0.336363636363636	-0.39678368097623	0.866666666666667	0.470588235294118	0.353759374819711	0.750543055795941	10	0.0010797905502021	HyperLow	chr1	21932691	21934705	Intron17	-	RAP1GAP	protein_coding	chr1	21934311	21934566	1	0.126613704071499	*	*	*	*	*	0	0	*	*	*	*	*	0	0	chr1-21934245:21934655	chr1	21934245	21934655	chr1	21934311	21934566	chr1-21934547:21934963	chr1	21934547	21934963	chr1
chr1	21957454	21958835	-0.196491228070175	0.212150932553343	0.590909090909091	0.888888888888889	0.464049074554845	0.307309364962454	30	0.026528853148602	HypoHigh	chr1	21952891	21976253	Intron2	-	RAP1GAP	protein_coding	chr1	21957454	21958835	1	0.0591130896327369	*	*	*	*	*	0	0	*	*	*	*	*	0	0	chr1-21958365:21959050	chr1	21958365	21959050	chr1	21958365	21958835	chr1-21958832:21959091	chr1	21958832	21959091	chr1
chr1	22198728	22200079	0.0909090909090911	-0.338826567879351	1	0.882352941176471	0	0.45698353148489	28	0.000996027902998575	HypoLow	chr1	22198679	22198870	Exon33	-	HSPG2	protein_coding	chr1	22198728	22198870	0.105107327905255	0.743455497382199	*	*	*	*	*	0	0	*	*	*	*	*	0	0	chr1-22198765:22198915	chr1	22198765	22198915	chr1	22198765	22198870	chr1-22198564:22198808	chr1	22198564	22198808	chr1
chr1	22198728	22200079	0.0909090909090911	-0.338826567879351	1	0.882352941176471	0	0.45698353148489	28	0.000996027902998575	HypoLow	chr1	22198871	22199112	Intron32	-	HSPG2	protein_coding	chr1	22198871	22199112	0.178386380458919	1	*	*	*	*	*	0	0	*	*	*	*	*	0	0	chr1-22199085:22199235	chr1	22199085	22199235	chr1	22199085	22199112	chr1-22199003:22199269	chr1	22199003	22199269	chr1
chr1	22198728	22200079	0.0909090909090911	-0.338826567879351	1	0.882352941176471	0	0.45698353148489	28	0.000996027902998575	HypoLow	chr1	22199113	22199253	Exon32	-	HSPG2	protein_coding	chr1	22199113	22199253	0.103626943005181	1	*	*	*	*	*	0	0	*	*	*	*	*	0	0	chr1-22199085:22199235	chr1	22199085	22199235	chr1	22199113	22199235	chr1-22199003:22199269	chr1	22199003	22199269	chr1
chr1	22198728	22200079	0.0909090909090911	-0.338826567879351	1	0.882352941176471	0	0.45698353148489	28	0.000996027902998575	HypoLow	chr1	22199254	22199489	Intron31	-	HSPG2	protein_coding	chr1	22199254	22199489	0.173945225758697	1	*	*	*	*	*	0	0	*	*	*	*	*	0	0	*	*	*	*	*	0	0	chr1-22199003:22199269	chr1	22199003	22199269	chr1
chr1	22198728	22200079	0.0909090909090911	-0.338826567879351	1	0.882352941176471	0	0.45698353148489	28	0.000996027902998575	HypoLow	chr1	22199490	22199584	Exon31	-	HSPG2	protein_coding	chr1	22199490	22199584	0.0695780903034789	1	*	*	*	*	*	0	0	*	*	*	*	*	0	0	*	*	*	*	*	0	0	*	*	*	*	*
chr1	22198728	22200079	0.0909090909090911	-0.338826567879351	1	0.882352941176471	0	0.45698353148489	28	0.000996027902998575	HypoLow	chr1	22199585	22199867	Intron30	-	HSPG2	protein_coding	chr1	22199585	22199867	0.208734270910437	1	*	*	*	*	*	0	0	*	*	*	*	*	0	0	chr1-22199765:22199915	chr1	22199765	22199915	chr1	22199765	22199867	*	*	*	*	*
chr1	22198728	22200079	0.0909090909090911	-0.338826567879351	1	0.882352941176471	0	0.45698353148489	28	0.000996027902998575	HypoLow	chr1	22199868	22199917	Exon30	-	HSPG2	protein_coding	chr1	22199868	22199917	0.0362694300518135	1	*	*	*	*	*	0	0	*	*	*	*	*	0	0	chr1-22199765:22199915	chr1	22199765	22199915	chr1	22199868	22199915	*	*	*	*	*
chr1	22198728	22200079	0.0909090909090911	-0.338826567879351	1	0.882352941176471	0	0.45698353148489	28	0.000996027902998575	HypoLow	chr1	22199918	22200417	Intron29	-	HSPG2	protein_coding	chr1	22199918	22200079	0.119170984455959	0.322645290581162	*	*	*	*	*	0	0	*	*	*	*	*	0	0	*	*	*	*	*	0	0	*	*	*	*	*
chr1	23548642	23555257	0.089285714285714	-0.204637375466724	0.9375	0.84412955465587	0.249192740568713	0.45698353148489	61	2.87275508789492e-06	HypoLow	*	*	*	InterGenic	*	*	*	*	*	*	*	*	*	*	*	*	*	0	0	*	*	*	*	*	0	0	chr1-23554265:23554535	chr1	23554265	23554535	chr1	23554265	23554535	chr1-23553326:23553842	chr1	23553326	23553842	chr1
chr1	23722055	23728273	0.0954545454545455	-0.217812970041195	0.962912087912088	0.833333333333333	0.240642698295787	0.5	59	3.0020112591175e-07	HypoLow	chr1	23720527	23724037	Intron7	-	TCEA3	protein_coding	chr1	23722055	23724037	0.318752010292699	0.564672364672365	*	*	*	*	*	0	0	*	*	*	*	*	0	0	chr1-23723985:23724135	chr1	23723985	23724135	chr1	23723985	23724037	chr1-23722937:23723151	chr1	23722937	23723151	chr1
chr1	23722055	23728273	0.0954545454545455	-0.217812970041195	0.962912087912088	0.833333333333333	0.240642698295787	0.5	59	3.0020112591175e-07	HypoLow	chr1	23724038	23724094	Exon7	-	TCEA3	protein_coding	chr1	23724038	23724094	0.0090061112898038	1	*	*	*	*	*	0	0	*	*	*	*	*	0	0	chr1-23723985:23724135	chr1	23723985	23724135	chr1	23724038	23724094	*	*	*	*	*
chr1	23722055	23728273	0.0954545454545455	-0.217812970041195	0.962912087912088	0.833333333333333	0.240642698295787	0.5	59	3.0020112591175e-07	HypoLow	chr1	23724095	23724284	Intron6	-	TCEA3	protein_coding	chr1	23724095	23724284	0.0303956256030878	1	*	*	*	*	*	0	0	*	*	*	*	*	0	0	chr1-23723985:23724135	chr1	23723985	23724135	chr1	23724095	23724135	*	*	*	*	*
chr1	23722055	23728273	0.0954545454545455	-0.217812970041195	0.962912087912088	0.833333333333333	0.240642698295787	0.5	59	3.0020112591175e-07	HypoLow	chr1	23724285	23724448	Exon6	-	TCEA3	protein_coding	chr1	23724285	23724448	0.0262142167899646	1	*	*	*	*	*	0	0	*	*	*	*	*	0	0	*	*	*	*	*	0	0	*	*	*	*	*
chr1	23722055	23728273	0.0954545454545455	-0.217812970041195	0.962912087912088	0.833333333333333	0.240642698295787	0.5	59	3.0020112591175e-07	HypoLow	chr1	23724449	23735156	Intron5	-	TCEA3	protein_coding	chr1	23724449	23728273	0.614988742360888	0.357149528345942	*	*	*	*	*	0	0	*	*	*	*	*	0	0	chr1-23727880:23728095	chr1	23727880	23728095	chr1	23727880	23728095	chr1-23727707:23728137	chr1	23727707	23728137	chr1
chr1	23773407	23775884	0.145962732919255	-0.291413720653616	0.928571428571429	0.823529411764706	0.181188147733199	0.468546354076522	16	0.00117293318949206	HypoLow	chr1	23769106	23777971	Intron5	-	ASAP3	protein_coding	chr1	23773407	23775884	1	0.27941342357586	*	*	*	*	*	0	0	*	*	*	*	*	0	0	chr1-23775845:23776110	chr1	23775845	23776110	chr1	23775845	23775884	chr1-23775832:23776072	chr1	23775832	23776072	chr1
chr1	23911672	23912403	-0.05	0.277936428398779	0.291666666666667	0.764705882352941	0.537399074234331	0.382944951426972	12	0.47785470463489	HypoHigh	chr1	23908169	23918971	Intron1	+	MDS2	protein_coding	chr1	23911672	23912403	1	0.0676726532123681	*	*	*	*	*	0	0	chr1:23912037-23912393	chr1	23912037	23912393	chr1	23912037	23912393	chr1-23912125:23912495	chr1	23912125	23912495	chr1	23912125	23912403	chr1-23912296:23912632	chr1	23912296	23912632	chr1
chr1	23912420	23914760	0.10975135975136	-0.237778961080935	0.970142602495544	0.870833333333334	0.15284586417988	0.413539990458113	25	1.91641965712306e-05	HypoLow	chr1	23908169	23918971	Intron1	+	MDS2	protein_coding	chr1	23912420	23914760	1	0.216626550638771	*	*	*	*	*	0	0	*	*	*	*	*	0	0	chr1-23914000:23914155	chr1	23914000	23914155	chr1	23914000	23914155	chr1-23914734:23915174	chr1	23914734	23915174	chr1
chr1	24381237	24385494	0.1	-0.20555432640544	0.962250712250712	0.857142857142857	0.146498995640504	0.423886860754314	55	2.03979215714527e-07	HypoLow	chr1	24368836	24390536	Intron2	+	RP11-293P20.2	antisense	chr1	24381237	24385494	1	0.196175115207373	*	*	*	*	*	0	0	*	*	*	*	*	0	0	chr1-24385145:24385390	chr1	24385145	24385390	chr1	24385145	24385390	chr1-24382091:24382367	chr1	24382091	24382367	chr1
chr1	24381237	24385494	0.1	-0.20555432640544	0.962250712250712	0.857142857142857	0.146498995640504	0.423886860754314	55	2.03979215714527e-07	HypoLow	chr1	24382527	24384117	LastExon	-	MYOM3	protein_coding	chr1	24382527	24384117	0.373502466525722	1	*	*	*	*	*	0	0	*	*	*	*	*	0	0	chr1-24383105:24383315	chr1	24383105	24383315	chr1	24383105	24383315	*	*	*	*	*
chr1	24381237	24385494	0.1	-0.20555432640544	0.962250712250712	0.857142857142857	0.146498995640504	0.423886860754314	55	2.03979215714527e-07	HypoLow	chr1	24384118	24385413	Intron36	-	MYOM3	protein_coding	chr1	24384118	24385413	0.30420483908856	1	*	*	*	*	*	0	0	*	*	*	*	*	0	0	chr1-24385145:24385390	chr1	24385145	24385390	chr1	24385145	24385390	*	*	*	*	*
chr1	24381237	24385494	0.1	-0.20555432640544	0.962250712250712	0.857142857142857	0.146498995640504	0.423886860754314	55	2.03979215714527e-07	HypoLow	chr1	24385414	24385469	Exon36	-	MYOM3	protein_coding	chr1	24385414	24385469	0.0129198966408269	1	*	*	*	*	*	0	0	*	*	*	*	*	0	0	*	*	*	*	*	0	0	*	*	*	*	*
chr1	24381237	24385494	0.1	-0.20555432640544	0.962250712250712	0.857142857142857	0.146498995640504	0.423886860754314	55	2.03979215714527e-07	HypoLow	chr1	24385470	24387549	Intron35	-	MYOM3	protein_coding	chr1	24385470	24385494	0.00563777307963354	0.0115440115440115	*	*	*	*	*	0	0	*	*	*	*	*	0	0	*	*	*	*	*	0	0	*	*	*	*	*
chr1	24517182	24518821	0.105263157894737	-0.261714256909832	0.91304347826087	0.791666666666667	0.233280946628746	0.483886921452589	20	0.0206960460392308	HypoLow	*	*	*	InterGenic	*	*	*	*	*	*	*	*	*	*	*	*	*	0	0	chr1:24518503-24518681	chr1	24518503	24518681	chr1	24518503	24518681	chr1-24518460:24518730	chr1	24518460	24518730	chr1	24518460	24518730	chr1-24518521:24518710	chr1	24518521	24518710	chr1
chr1	24645993	24646290	0.283088235294118	-0.0019267605532175	0.40625	0.152573529411764	0.583333333333333	0.594719709283807	11	0.025581296157479	HyperHigh	chr1	24638483	24648155	Intron1	-	RP11-10N16.3	antisense	chr1	24645993	24646290	1	0.0307071960297767	*	*	*	*	*	0	0	*	*	*	*	*	0	0	chr1-24645685:24646315	chr1	24645685	24646315	chr1	24645993	24646290	chr1-24646267:24646937	chr1	24646267	24646937	chr1
chr1	24645993	24646290	0.283088235294118	-0.0019267605532175	0.40625	0.152573529411764	0.583333333333333	0.594719709283807	11	0.025581296157479	HyperHigh	chr1	24645915	24646058	FirstExon	+	GRHL3	protein_coding	chr1	24645993	24646058	0.218855218855219	0.454545454545455	*	*	*	*	*	0	0	*	*	*	*	*	0	0	chr1-24645685:24646315	chr1	24645685	24646315	chr1	24645993	24646058	chr1-24645920:24647034	chr1	24645920	24647034	chr1
chr1	24645993	24646290	0.283088235294118	-0.0019267605532175	0.40625	0.152573529411764	0.583333333333333	0.594719709283807	11	0.025581296157479	HyperHigh	chr1	24646059	24657915	Intron1	+	GRHL3	protein_coding	chr1	24646059	24646290	0.777777777777778	0.0194838056680162	*	*	*	*	*	0	0	*	*	*	*	*	0	0	chr1-24645685:24646315	chr1	24645685	24646315	chr1	24646059	24646290	chr1-24646267:24646937	chr1	24646267	24646937	chr1
chr1	24709661	24712289	0.105263157894737	-0.207260379179207	0.958333333333333	0.863636363636364	0.167752778258549	0.452259883149013	30	0.000183070464900427	HypoLow	chr1	24706314	24710391	Intron5	-	STPG1	protein_coding	chr1	24709661	24710391	0.277777777777778	0.179053225410841	*	*	*	*	*	0	0	*	*	*	*	*	0	0	chr1-24709980:24710335	chr1	24709980	24710335	chr1	24709980	24710335	*	*	*	*	*
chr1	24709661	24712289	0.105263157894737	-0.207260379179207	0.958333333333333	0.863636363636364	0.167752778258549	0.452259883149013	30	0.000183070464900427	HypoLow	chr1	24710392	24710493	Exon5	-	STPG1	protein_coding	chr1	24710392	24710493	0.0384322678843227	1	*	*	*	*	*	0	0	*	*	*	*	*	0	0	chr1-24710440:24710590	chr1	24710440	24710590	chr1	24710440	24710493	*	*	*	*	*
chr1	24709661	24712289	0.105263157894737	-0.207260379179207	0.958333333333333	0.863636363636364	0.167752778258549	0.452259883149013	30	0.000183070464900427	HypoLow	chr1	24710494	24718050	Intron4	-	STPG1	protein_coding	chr1	24710494	24712289	0.683028919330289	0.237559555320275	*	*	*	*	*	0	0	chr1:24712127-24712358	chr1	24712127	24712358	chr1	24712127	24712289	chr1-24712060:24712410	chr1	24712060	24712410	chr1	24712060	24712289	chr1-24712138:24712382	chr1	24712138	24712382	chr1
chr1	25190039	25191211	0.0752976190476192	0.302844725516923	0.194570135746606	0	0.454621707316952	0.197224259527442	23	0.0058489858353433	HypoHigh	*	*	*	InterGenic	*	*	*	*	*	*	*	*	*	*	*	*	*	0	0	*	*	*	*	*	0	0	chr1-25190720:25191415	chr1	25190720	25191415	chr1	25190720	25191211	chr1-25191058:25191179	chr1	25191058	25191179	chr1
chr1	25333342	25333783	0.233211545487761	0.265568835134339	0.730952380952381	0.448484848484848	0.613838502129999	0.314874404751527	11	0.0691177480937299	HyperHigh	*	*	*	InterGenic	*	*	*	*	*	*	*	*	*	*	*	*	*	0	0	*	*	*	*	*	0	0	chr1-25333380:25333590	chr1	25333380	25333590	chr1	25333380	25333590	chr1-25333318:25333668	chr1	25333318	25333668	chr1
chr1	25468008	25470602	0.125	-0.307309364962454	0.956521739130435	0.8	0.167752778258549	0.482938545241728	34	5.61780909257943e-06	HypoLow	*	*	*	InterGenic	*	*	*	*	*	*	*	*	*	*	*	*	*	0	0	*	*	*	*	*	0	0	chr1-25469825:25470035	chr1	25469825	25470035	chr1	25469825	25470035	chr1-25469874:25470324	chr1	25469874	25470324	chr1
chr1	25646449	25656204	0.0755012531328325	-0.206301432265389	0.961538461538462	0.857142857142857	0.193286585371655	0.431192306896063	123	1.40933951169587e-12	HypoLow	chr1	25643571	25648379	Intron8	+	RHD	protein_coding	chr1	25646449	25648379	0.197847257816504	0.401414309484193	*	*	*	*	*	0	0	*	*	*	*	*	0	0	chr1-25647125:25647275	chr1	25647125	25647275	chr1	25647125	25647275	chr1-25646772:25647272	chr1	25646772	25647272	chr1
chr1	25646449	25656204	0.0755012531328325	-0.206301432265389	0.961538461538462	0.857142857142857	0.193286585371655	0.431192306896063	123	1.40933951169587e-12	HypoLow	chr1	25648380	25648453	Exon9	+	RHD	protein_coding	chr1	25648380	25648453	0.00748334187596105	1	*	*	*	*	*	0	0	*	*	*	*	*	0	0	*	*	*	*	*	0	0	chr1-25648451:25649051	chr1	25648451	25649051	chr1
chr1	25646449	25656204	0.0755012531328325	-0.206301432265389	0.961538461538462	0.857142857142857	0.193286585371655	0.431192306896063	123	1.40933951169587e-12	HypoLow	chr1	25648454	25655388	Intron9	+	RHD	protein_coding	chr1	25648454	25655388	0.710814966683752	1	*	*	*	*	*	0	0	*	*	*	*	*	0	0	chr1-25655345:25655590	chr1	25655345	25655590	chr1	25655345	25655388	chr1-25649718:25650122	chr1	25649718	25650122	chr1
chr1	25646449	25656204	0.0755012531328325	-0.206301432265389	0.961538461538462	0.857142857142857	0.193286585371655	0.431192306896063	123	1.40933951169587e-12	HypoLow	chr1	25655389	25656936	LastExon	+	RHD	protein_coding	chr1	25655389	25656204	0.0835468990261404	0.526826115061409	*	*	*	*	*	0	0	*	*	*	*	*	0	0	chr1-25655860:25656155	chr1	25655860	25656155	chr1	25655860	25656155	*	*	*	*	*
chr1	25658746	25662409	0.0795927601809955	-0.227390237636287	0.956959706959707	0.912878787878788	0.218750208406018	0.380030573531078	33	0.00900055582606858	HypoLow	*	*	*	InterGenic	*	*	*	*	*	*	*	*	*	*	*	*	*	0	0	*	*	*	*	*	0	0	*	*	*	*	*	0	0	chr1-25660745:25661445	chr1	25660745	25661445	chr1
chr1	25687811	25690001	0.220907928388747	-0.137666541939321	0.809090909090909	0.4375	0.38003855950487	0.470655816047343	23	0.0044917418694196	HyperLow	chr1	25687151	25688852	LastExon	+	TMEM50A	protein_coding	chr1	25687811	25688852	0.475342465753425	0.611992945326279	*	*	*	*	*	0	0	*	*	*	*	*	0	0	chr1-25688460:25688995	chr1	25688460	25688995	chr1	25688460	25688852	chr1-25687929:25688632	chr1	25687929	25688632	chr1
chr1	25687811	25690001	0.220907928388747	-0.137666541939321	0.809090909090909	0.4375	0.38003855950487	0.470655816047343	23	0.0044917418694196	HyperLow	chr1	25688803	25689044	LastExon	-	RHCE	protein_coding	chr1	25688803	25689044	0.110045662100457	1	*	*	*	*	*	0	0	*	*	*	*	*	0	0	chr1-25688460:25688995	chr1	25688460	25688995	chr1	25688803	25688995	*	*	*	*	*
chr1	25687811	25690001	0.220907928388747	-0.137666541939321	0.809090909090909	0.4375	0.38003855950487	0.470655816047343	23	0.0044917418694196	HyperLow	chr1	25689045	25696957	Intron11	-	RHCE	protein_coding	chr1	25689045	25690001	0.436529680365297	0.120829120323559	*	*	*	*	*	0	0	*	*	*	*	*	0	0	*	*	*	*	*	0	0	*	*	*	*	*
chr1	26096953	26098072	-0.0997076023391815	-0.243463445364742	0.0488095238095238	0.192219679633867	0	0.438959493589774	23	0.00143614462465157	HypoLow	chr1	26090459	26098147	Intron7	+	MAN1C1	protein_coding	chr1	26096953	26098072	1	0.145551508844953	CpG: 16	chr1	26097904	26098107	chr1	26097904	26098072	*	*	*	*	*	0	0	chr1-26097725:26098175	chr1	26097725	26098175	chr1	26097725	26098072	chr1-26098026:26098702	chr1	26098026	26098702	chr1
chr1	26365359	26367237	-0.0781297134238315	0.231860099625353	0.884868421052632	0.937254901960784	0.365890839976776	0.162042321394155	27	0.058125220981867	HypoHigh	chr1	26363743	26365796	LastExon	-	SLC30A2	protein_coding	chr1	26365359	26365796	0.232694355697551	0.212859230394545	*	*	*	*	*	0	0	*	*	*	*	*	0	0	chr1-26365445:26365655	chr1	26365445	26365655	chr1	26365445	26365655	*	*	*	*	*
chr1	26365359	26367237	-0.0781297134238315	0.231860099625353	0.884868421052632	0.937254901960784	0.365890839976776	0.162042321394155	27	0.058125220981867	HypoHigh	chr1	26365797	26366267	Intron6	-	SLC30A2	protein_coding	chr1	26365797	26366267	0.250266240681576	1	*	*	*	*	*	0	0	*	*	*	*	*	0	0	chr1-26366125:26366430	chr1	26366125	26366430	chr1	26366125	26366267	*	*	*	*	*
chr1	26365359	26367237	-0.0781297134238315	0.231860099625353	0.884868421052632	0.937254901960784	0.365890839976776	0.162042321394155	27	0.058125220981867	HypoHigh	chr1	26366268	26366402	Exon6	-	SLC30A2	protein_coding	chr1	26366268	26366402	0.0713525026624068	1	*	*	*	*	*	0	0	*	*	*	*	*	0	0	chr1-26366125:26366430	chr1	26366125	26366430	chr1	26366268	26366402	*	*	*	*	*
chr1	26365359	26367237	-0.0781297134238315	0.231860099625353	0.884868421052632	0.937254901960784	0.365890839976776	0.162042321394155	27	0.058125220981867	HypoHigh	chr1	26366403	26368190	Intron5	-	SLC30A2	protein_coding	chr1	26366403	26367237	0.44408945686901	0.46670397313934	*	*	*	*	*	0	0	*	*	*	*	*	0	0	chr1-26366565:26366715	chr1	26366565	26366715	chr1	26366565	26366715	chr1-26366539:26366995	chr1	26366539	26366995	chr1
chr1	26686278	26687471	0.205263157894737	0.15598309276144	0.506015037593985	0.232051282051282	0.573318622580361	0.442961202127026	37	0.00176648139542138	HyperHigh	*	*	*	InterGenic	*	*	*	*	*	*	*	*	CpG: 66	chr1	26686516	26687281	chr1	26686516	26687281	*	*	*	*	*	0	0	chr1-26687305:26687795	chr1	26687305	26687795	chr1	26687305	26687471	chr1-26687081:26687330	chr1	26687081	26687330	chr1
chr1	27178620	27182926	0.077380952380952	-0.213848302559629	1	0.909090909090909	0	0.328808909576947	45	3.8067019084515e-06	HypoLow	chr1	27177723	27179243	Intron6	+	ZDHHC18	protein_coding	chr1	27178620	27179243	0.144681839294008	0.409868421052632	*	*	*	*	*	0	0	*	*	*	*	*	0	0	chr1-27179145:27179295	chr1	27179145	27179295	chr1	27179145	27179243	*	*	*	*	*
chr1	27178620	27182926	0.077380952380952	-0.213848302559629	1	0.909090909090909	0	0.328808909576947	45	3.8067019084515e-06	HypoLow	chr1	27179244	27179356	Exon7	+	ZDHHC18	protein_coding	chr1	27179244	27179356	0.0260102183000464	1	*	*	*	*	*	0	0	*	*	*	*	*	0	0	chr1-27179145:27179295	chr1	27179145	27179295	chr1	27179244	27179295	chr1-27179332:27179684	chr1	27179332	27179684	chr1
chr1	27178620	27182926	0.077380952380952	-0.213848302559629	1	0.909090909090909	0	0.328808909576947	45	3.8067019084515e-06	HypoLow	chr1	27179357	27180216	Intron7	+	ZDHHC18	protein_coding	chr1	27179357	27180216	0.199489084997678	1	*	*	*	*	*	0	0	*	*	*	*	*	0	0	chr1-27180025:27180175	chr1	27180025	27180175	chr1	27180025	27180175	chr1-27179890:27180666	chr1	27179890	27180666	chr1
chr1	27178620	27182926	0.077380952380952	-0.213848302559629	1	0.909090909090909	0	0.328808909576947	45	3.8067019084515e-06	HypoLow	chr1	27180217	27184092	LastExon	+	ZDHHC18	protein_coding	chr1	27180217	27182926	0.629122155132373	0.699096774193548	*	*	*	*	*	0	0	*	*	*	*	*	0	0	chr1-27182865:27183135	chr1	27182865	27183135	chr1	27182865	27182926	chr1-27182905:27183569	chr1	27182905	27183569	chr1
chr1	27399600	27403724	0.111111111111111	-0.291395138768696	1	0.866666666666667	0.181188147733199	0.412213580647056	46	2.00615988939861e-06	HypoLow	*	*	*	InterGenic	*	*	*	*	*	*	*	*	*	*	*	*	*	0	0	chr1:27400779-27401092	chr1	27400779	27401092	chr1	27400779	27401092	chr1-27403705:27403855	chr1	27403705	27403855	chr1	27403705	27403724	chr1-27403418:27403728	chr1	27403418	27403728	chr1
chr1	27793813	27794876	0.107142857142857	-0.242846456173729	0.9375	0.884615384615385	0.216674140549451	0.483489154469516	20	0.00394720985782084	HypoLow	chr1	27755444	27816496	Intron1	-	WASF2	protein_coding	chr1	27793813	27794876	1	0.0174113870143484	*	*	*	*	*	0	0	*	*	*	*	*	0	0	*	*	*	*	*	0	0	chr1-27794795:27795275	chr1	27794795	27795275	chr1
chr1	29212868	29213249	0.167174896714539	-0.379596459928212	0.968052738336714	0.766968325791855	0.187046797064424	0.536859081110547	11	0.0133067648140918	HypoLow	chr1	29212602	29213602	Promoter	+	EPB41	protein_coding	chr1	29212868	29213249	1	0.381	*	*	*	*	*	0	0	*	*	*	*	*	0	0	chr1-29213220:29213675	chr1	29213220	29213675	chr1	29213220	29213249	chr1-29213248:29213652	chr1	29213248	29213652	chr1
chr1	29506498	29507013	-0.231829573934837	-0.359273055270382	0.0557275541795665	0.360681114551083	0.256340952427962	0.686405366781162	9	0.051684522115132	HypoLow	chr1	29487030	29508157	Intron1	-	SRSF4	protein_coding	chr1	29506498	29507013	1	0.0243763904009088	*	*	*	*	*	0	0	*	*	*	*	*	0	0	chr1-29506985:29507235	chr1	29506985	29507235	chr1	29506985	29507013	chr1-29506879:29507279	chr1	29506879	29507279	chr1
chr1	29559146	29561186	-0.100961538461538	0.255594321812047	0.816666666666667	0.933333333333333	0.514183803003841	0.197224259527442	19	0.0909748185008293	HypoHigh	*	*	*	InterGenic	*	*	*	*	*	*	*	*	*	*	*	*	*	0	0	*	*	*	*	*	0	0	chr1-29561100:29561475	chr1	29561100	29561475	chr1	29561100	29561186	chr1-29561042:29561326	chr1	29561042	29561326	chr1
chr1	29566898	29567396	-0.280232353458898	0.4210090625803	0.525	0.887719298245614	0.630988287504283	0.218933478911614	7	0.0650809586577916	HypoHigh	chr1	29563230	29581786	Intron1	+	PTPRU	protein_coding	chr1	29566898	29567396	1	0.026837680534598	*	*	*	*	*	0	0	*	*	*	*	*	0	0	chr1-29566860:29567335	chr1	29566860	29567335	chr1	29566898	29567335	chr1-29566991:29567251	chr1	29566991	29567251	chr1
chr1	30148419	30149911	0.126984126984127	-0.239473463480292	0.944444444444444	0.733333333333333	0.288618872485741	0.597494028096655	19	0.0106447577065301	HypoLow	*	*	*	InterGenic	*	*	*	*	*	*	*	*	*	*	*	*	*	0	0	*	*	*	*	*	0	0	chr1-30149345:30149630	chr1	30149345	30149630	chr1	30149345	30149630	chr1-30148467:30148887	chr1	30148467	30148887	chr1
chr1	30507473	30507928	0.203703703703703	0.090099642499846	0.692307692307692	0.277777777777778	0.556393445622244	0.459594497828725	16	0.03804543237689	HyperHigh	chr1	30502338	30509618	Intron2	-	RP11-111I12.1	lincRNA	chr1	30507473	30507928	1	0.0625	*	*	*	*	*	0	0	*	*	*	*	*	0	0	chr1-30507360:30508175	chr1	30507360	30508175	chr1	30507473	30507928	chr1-30507927:30508287	chr1	30507927	30508287	chr1
chr1	30787785	30788236	-0.306262626262627	-0.0227800594219895	0.218840579710145	0.737556561085973	0.508132490115899	0.514160416786859	9	0.0498834498834499	HypoHigh	*	*	*	InterGenic	*	*	*	*	*	*	*	*	*	*	*	*	*	0	0	*	*	*	*	*	0	0	chr1-30787725:30787975	chr1	30787725	30787975	chr1	30787785	30787975	chr1-30788162:30788542	chr1	30788162	30788542	chr1
chr1	31047839	31049517	0.209150326797385	-0.085514833462103	0.87962962962963	0.714285714285714	0.466947674635156	0.527664085548019	17	0.0345923508048282	HyperHigh	*	*	*	InterGenic	*	*	*	*	*	*	*	*	*	*	*	*	*	0	0	*	*	*	*	*	0	0	chr1-31048225:31048375	chr1	31048225	31048375	chr1	31048225	31048375	*	*	*	*	*
chr1	31190645	31190818	0.37	0.241767488533436	0.575	0.138888888888889	0.698966457312586	0.434898335137694	7	0.00865800865800866	HyperHigh	chr1	31189763	31191581	Intron3	-	MATN1	protein_coding	chr1	31190645	31190818	1	0.0951595159515952	*	*	*	*	*	0	0	*	*	*	*	*	0	0	chr1-31190805:31192750	chr1	31190805	31192750	chr1	31190805	31190818	chr1-31190812:31191236	chr1	31190812	31191236	chr1
chr1	31190645	31190818	0.37	0.241767488533436	0.575	0.138888888888889	0.698966457312586	0.434898335137694	7	0.00865800865800866	HyperHigh	chr1	31190350	31191350	Promoter	+	MATN1-AS1	antisense	chr1	31190645	31190818	1	0.173	*	*	*	*	*	0	0	*	*	*	*	*	0	0	chr1-31190805:31192750	chr1	31190805	31192750	chr1	31190805	31190818	chr1-31190812:31191236	chr1	31190812	31191236	chr1
chr1	31226444	31227105	0.500816058688922	-0.2579147101557	0.784090909090909	0.184659090909091	0.394049733181077	0.628878825533463	15	0.000135771812301054	HyperLow	chr1	31215397	31230505	Intron1	-	LAPTM5	protein_coding	chr1	31226444	31227105	1	0.043751654752449	*	*	*	*	*	0	0	*	*	*	*	*	0	0	chr1-31226540:31226950	chr1	31226540	31226950	chr1	31226540	31226950	chr1-31227093:31228054	chr1	31227093	31228054	chr1
chr1	31384761	31386997	0.098729227761486	-0.312782612446473	0.939393939393939	0.777777777777778	0.21340214445349	0.562647698199633	28	0.000738741754166611	HypoLow	*	*	*	InterGenic	*	*	*	*	*	*	*	*	*	*	*	*	*	0	0	*	*	*	*	*	0	0	chr1-31386900:31387055	chr1	31386900	31387055	chr1	31386900	31386997	chr1-31386856:31387120	chr1	31386856	31387120	chr1
chr1	31510873	31513099	0.119617224880383	-0.237267559142474	0.961538461538462	0.846153846153846	0.240642698295787	0.516264980231799	24	0.00077078092883964	HypoLow	chr1	31501712	31532050	Intron2	-	PUM1	protein_coding	chr1	31510873	31513099	1	0.0733733271804338	*	*	*	*	*	0	0	*	*	*	*	*	0	0	chr1-31512960:31513235	chr1	31512960	31513235	chr1	31512960	31513099	chr1-31513010:31513192	chr1	31513010	31513192	chr1
chr1	31844374	31845709	0.142857142857143	-0.22326909059219	0.958333333333333	0.733333333333333	0.293763633076898	0.518885569154274	14	0.0237800041834051	HypoLow	chr1	31842405	31845788	Intron1	-	FABP3	protein_coding	chr1	31844374	31845709	1	0.394620159621638	*	*	*	*	*	0	0	*	*	*	*	*	0	0	chr1-31845240:31845455	chr1	31845240	31845455	chr1	31845240	31845455	chr1-31845699:31846383	chr1	31845699	31846383	chr1
chr1	32001252	32001596	-0.387254901960785	-0.229508463420229	0.0833333333333333	0.470588235294118	0.42573393706742	0.706026069783237	8	0.00326029360191014	HypoLow	*	*	*	InterGenic	*	*	*	*	*	*	*	*	*	*	*	*	*	0	0	chr1:32001284-32001534	chr1	32001284	32001534	chr1	32001284	32001534	chr1-32001240:32001495	chr1	32001240	32001495	chr1	32001252	32001495	chr1-32001578:32002014	chr1	32001578	32002014	chr1
chr1	32002286	32009518	0.0797619047619045	-0.23000243903918	0.945112781954887	0.866666666666667	0.237119292459983	0.432931646898466	69	7.18568844735627e-07	HypoLow	*	*	*	InterGenic	*	*	*	*	*	*	*	*	*	*	*	*	*	0	0	chr1:32002783-32002833	chr1	32002783	32002833	chr1	32002783	32002833	chr1-32007605:32007755	chr1	32007605	32007755	chr1	32007605	32007755	chr1-32004999:32005275	chr1	32004999	32005275	chr1
chr1	32126187	32128865	0.100469399881164	-0.314624156677755	0.961481481481481	0.807987711213518	0.270426041486378	0.556957414195081	31	0.00384215867017401	HypoLow	chr1	32126186	32126239	Exon62	-	COL16A1	protein_coding	chr1	32126187	32126239	0.0194174757281553	0.981132075471698	*	*	*	*	*	0	0	*	*	*	*	*	0	0	chr1-32126105:32126335	chr1	32126105	32126335	chr1	32126187	32126239	chr1-32126037:32126357	chr1	32126037	32126357	chr1
chr1	32126187	32128865	0.100469399881164	-0.314624156677755	0.961481481481481	0.807987711213518	0.270426041486378	0.556957414195081	31	0.00384215867017401	HypoLow	chr1	32126240	32126666	Intron61	-	COL16A1	protein_coding	chr1	32126240	32126666	0.159073935772965	1	*	*	*	*	*	0	0	*	*	*	*	*	0	0	chr1-32126365:32127115	chr1	32126365	32127115	chr1	32126365	32126666	chr1-32126037:32126357	chr1	32126037	32126357	chr1
chr1	32126187	32128865	0.100469399881164	-0.314624156677755	0.961481481481481	0.807987711213518	0.270426041486378	0.556957414195081	31	0.00384215867017401	HypoLow	chr1	32126667	32126720	Exon61	-	COL16A1	protein_coding	chr1	32126667	32126720	0.0197908887229276	1	*	*	*	*	*	0	0	*	*	*	*	*	0	0	chr1-32126365:32127115	chr1	32126365	32127115	chr1	32126667	32126720	*	*	*	*	*
chr1	32126187	32128865	0.100469399881164	-0.314624156677755	0.961481481481481	0.807987711213518	0.270426041486378	0.556957414195081	31	0.00384215867017401	HypoLow	chr1	32126721	32127014	Intron60	-	COL16A1	protein_coding	chr1	32126721	32127014	0.10941000746826	1	*	*	*	*	*	0	0	*	*	*	*	*	0	0	chr1-32126365:32127115	chr1	32126365	32127115	chr1	32126721	32127014	*	*	*	*	*
chr1	32126187	32128865	0.100469399881164	-0.314624156677755	0.961481481481481	0.807987711213518	0.270426041486378	0.556957414195081	31	0.00384215867017401	HypoLow	chr1	32127015	32127059	Exon60	-	COL16A1	protein_coding	chr1	32127015	32127059	0.0164301717699776	1	*	*	*	*	*	0	0	*	*	*	*	*	0	0	chr1-32126365:32127115	chr1	32126365	32127115	chr1	32127015	32127059	*	*	*	*	*
chr1	32126187	32128865	0.100469399881164	-0.314624156677755	0.961481481481481	0.807987711213518	0.270426041486378	0.556957414195081	31	0.00384215867017401	HypoLow	chr1	32127060	32127260	Intron59	-	COL16A1	protein_coding	chr1	32127060	32127260	0.0746825989544436	1	*	*	*	*	*	0	0	*	*	*	*	*	0	0	chr1-32126365:32127115	chr1	32126365	32127115	chr1	32127060	32127115	*	*	*	*	*
chr1	32126187	32128865	0.100469399881164	-0.314624156677755	0.961481481481481	0.807987711213518	0.270426041486378	0.556957414195081	31	0.00384215867017401	HypoLow	chr1	32127261	32127305	Exon59	-	COL16A1	protein_coding	chr1	32127261	32127305	0.0164301717699776	1	*	*	*	*	*	0	0	*	*	*	*	*	0	0	chr1-32127265:32127515	chr1	32127265	32127515	chr1	32127265	32127305	*	*	*	*	*
chr1	32126187	32128865	0.100469399881164	-0.314624156677755	0.961481481481481	0.807987711213518	0.270426041486378	0.556957414195081	31	0.00384215867017401	HypoLow	chr1	32127306	32127934	Intron58	-	COL16A1	protein_coding	chr1	32127306	32127934	0.234503360716953	1	*	*	*	*	*	0	0	*	*	*	*	*	0	0	chr1-32127560:32127835	chr1	32127560	32127835	chr1	32127560	32127835	*	*	*	*	*
chr1	32126187	32128865	0.100469399881164	-0.314624156677755	0.961481481481481	0.807987711213518	0.270426041486378	0.556957414195081	31	0.00384215867017401	HypoLow	chr1	32127935	32127988	Exon58	-	COL16A1	protein_coding	chr1	32127935	32127988	0.0197908887229276	1	*	*	*	*	*	0	0	*	*	*	*	*	0	0	*	*	*	*	*	0	0	*	*	*	*	*
chr1	32126187	32128865	0.100469399881164	-0.314624156677755	0.961481481481481	0.807987711213518	0.270426041486378	0.556957414195081	31	0.00384215867017401	HypoLow	chr1	32127989	32128187	Intron57	-	COL16A1	protein_coding	chr1	32127989	32128187	0.0739357729648992	1	*	*	*	*	*	0	0	*	*	*	*	*	0	0	*	*	*	*	*	0	0	*	*	*	*	*
chr1	32126187	32128865	0.100469399881164	-0.314624156677755	0.961481481481481	0.807987711213518	0.270426041486378	0.556957414195081	31	0.00384215867017401	HypoLow	chr1	32128188	32128259	Exon57	-	COL16A1	protein_coding	chr1	32128188	32128259	0.0265123226288275	1	*	*	*	*	*	0	0	*	*	*	*	*	0	0	chr1-32128200:32128570	chr1	32128200	32128570	chr1	32128200	32128259	chr1-32128221:32128505	chr1	32128221	32128505	chr1
chr1	32126187	32128865	0.100469399881164	-0.314624156677755	0.961481481481481	0.807987711213518	0.270426041486378	0.556957414195081	31	0.00384215867017401	HypoLow	chr1	32128260	32130772	Intron56	-	COL16A1	protein_coding	chr1	32128260	32128865	0.225914861837192	0.240843949044586	*	*	*	*	*	0	0	*	*	*	*	*	0	0	chr1-32128585:32128995	chr1	32128585	32128995	chr1	32128585	32128865	chr1-32128221:32128505	chr1	32128221	32128505	chr1
chr1	32135178	32135609	0.248677248677249	0.12077606315482	0.857142857142857	0.5625	0.453654682481227	0.350980253520878	14	0.0312233599737458	HyperHigh	chr1	32134457	32136202	Intron49	-	COL16A1	protein_coding	chr1	32135178	32135609	1	0.246991404011461	*	*	*	*	*	0	0	*	*	*	*	*	0	0	chr1-32135160:32136195	chr1	32135160	32136195	chr1	32135178	32135609	chr1-32135577:32136073	chr1	32135577	32136073	chr1
chr1	32169415	32170506	0.380797101449275	0.288013799029269	0.49	0.0645833333333334	0.585734890874657	0.323650198151556	31	2.02618100178257e-09	HyperHigh	chr1	32167829	32169437	Intron1	-	COL16A1	protein_coding	chr1	32169415	32169437	0.0201649862511457	0.013681592039801	*	*	*	*	*	0	0	*	*	*	*	*	0	0	chr1-32169340:32169915	chr1	32169340	32169915	chr1	32169415	32169437	chr1-32169369:32169769	chr1	32169369	32169769	chr1
chr1	32169415	32170506	0.380797101449275	0.288013799029269	0.49	0.0645833333333334	0.585734890874657	0.323650198151556	31	2.02618100178257e-09	HyperHigh	chr1	32169438	32169920	FirstExon	-	COL16A1	protein_coding	chr1	32169438	32169920	0.44179651695692	1	CpG: 27	chr1	32169537	32169869	chr1	32169537	32169869	*	*	*	*	*	0	0	chr1-32169340:32169915	chr1	32169340	32169915	chr1	32169438	32169915	chr1-32169589:32170039	chr1	32169589	32170039	chr1
chr1	32169415	32170506	0.380797101449275	0.288013799029269	0.49	0.0645833333333334	0.585734890874657	0.323650198151556	31	2.02618100178257e-09	HyperHigh	chr1	32169921	32170921	Promoter	-	COL16A1	protein_coding	chr1	32169921	32170506	0.536205316223648	0.585	*	*	*	*	*	0	0	*	*	*	*	*	0	0	chr1-32170005:32170775	chr1	32170005	32170775	chr1	32170005	32170506	chr1-32170500:32171056	chr1	32170500	32171056	chr1
chr1	32237536	32239295	0.201298701298701	0.12314455609107	0.374125874125875	0.122377622377622	0.526110023898328	0.329151611669605	43	0.00114434833120441	HyperHigh	*	*	*	InterGenic	*	*	*	*	*	*	*	*	CpG: 75	chr1	32237827	32238661	chr1	32237827	32238661	chr1:32237691-32238692	chr1	32237691	32238692	chr1	32237691	32238692	chr1-32238985:32239135	chr1	32238985	32239135	chr1	32238985	32239135	chr1-32237986:32238197	chr1	32237986	32238197	chr1
chr1	32391023	32393045	0.1699604743083	-0.231019563491947	0.894736842105263	0.652173913043478	0.408131481801995	0.61412366439237	28	4.95922121073798e-05	HypoLow	chr1	32385260	32410193	Intron1	-	PTP4A2	protein_coding	chr1	32391023	32393045	1	0.0810973408735411	*	*	*	*	*	0	0	*	*	*	*	*	0	0	chr1-32392900:32393350	chr1	32392900	32393350	chr1	32392900	32393045	chr1-32393033:32393489	chr1	32393033	32393489	chr1
chr1	32740879	32741451	0.218614718614719	0.041589457154405	0.470588235294118	0.25	0.520935543897725	0.450676700585984	22	0.022053182302718	HyperHigh	chr1	32740685	32740921	Intron4	+	LCK	protein_coding	chr1	32740879	32740921	0.0734265734265734	0.177966101694915	CpG: 74	chr1	32740710	32741544	chr1	32740879	32740921	*	*	*	*	*	0	0	chr1-32740905:32741335	chr1	32740905	32741335	chr1	32740905	32740921	chr1-32740586:32741317	chr1	32740586	32741317	chr1
chr1	32740879	32741451	0.218614718614719	0.041589457154405	0.470588235294118	0.25	0.520935543897725	0.450676700585984	22	0.022053182302718	HyperHigh	chr1	32740922	32741020	Exon5	+	LCK	protein_coding	chr1	32740922	32741020	0.171328671328671	1	CpG: 74	chr1	32740710	32741544	chr1	32740922	32741020	*	*	*	*	*	0	0	chr1-32740905:32741335	chr1	32740905	32741335	chr1	32740922	32741020	chr1-32740979:32741281	chr1	32740979	32741281	chr1
chr1	32740879	32741451	0.218614718614719	0.041589457154405	0.470588235294118	0.25	0.520935543897725	0.450676700585984	22	0.022053182302718	HyperHigh	chr1	32741021	32741169	Intron5	+	LCK	protein_coding	chr1	32741021	32741169	0.258741258741259	1	CpG: 74	chr1	32740710	32741544	chr1	32741021	32741169	*	*	*	*	*	0	0	chr1-32740905:32741335	chr1	32740905	32741335	chr1	32741021	32741169	chr1-32740979:32741281	chr1	32740979	32741281	chr1
chr1	32740879	32741451	0.218614718614719	0.041589457154405	0.470588235294118	0.25	0.520935543897725	0.450676700585984	22	0.022053182302718	HyperHigh	chr1	32741170	32741273	Exon6	+	LCK	protein_coding	chr1	32741170	32741273	0.18006993006993	1	CpG: 74	chr1	32740710	32741544	chr1	32741170	32741273	*	*	*	*	*	0	0	chr1-32740905:32741335	chr1	32740905	32741335	chr1	32741170	32741273	chr1-32740979:32741281	chr1	32740979	32741281	chr1
chr1	32740879	32741451	0.218614718614719	0.041589457154405	0.470588235294118	0.25	0.520935543897725	0.450676700585984	22	0.022053182302718	HyperHigh	chr1	32741274	32741514	Intron6	+	LCK	protein_coding	chr1	32741274	32741451	0.309440559440559	0.7375	CpG: 74	chr1	32740710	32741544	chr1	32741274	32741451	*	*	*	*	*	0	0	chr1-32740905:32741335	chr1	32740905	32741335	chr1	32741274	32741335	chr1-32740979:32741281	chr1	32740979	32741281	chr1
chr1	32827224	32827548	0.345588235294118	-0.06529610296118	0.681818181818182	0.166666666666667	0.461477168113533	0.472765278018163	14	0.0020804399291179	HyperHigh	chr1	32826797	32827797	Promoter	+	TSSK3	protein_coding	chr1	32827224	32827548	1	0.324	CpG: 109	chr1	32826944	32828017	chr1	32827224	32827548	*	*	*	*	*	0	0	chr1-32826525:32828615	chr1	32826525	32828615	chr1	32827224	32827548	chr1-32827525:32828045	chr1	32827525	32828045	chr1
chr1	32827224	32827548	0.345588235294118	-0.06529610296118	0.681818181818182	0.166666666666667	0.461477168113533	0.472765278018163	14	0.0020804399291179	HyperHigh	chr1	32827330	32827477	LastExon	-	FAM229A	protein_coding	chr1	32827330	32827477	0.453703703703704	1	CpG: 109	chr1	32826944	32828017	chr1	32827330	32827477	*	*	*	*	*	0	0	chr1-32826525:32828615	chr1	32826525	32828615	chr1	32827330	32827477	chr1-32827472:32827982	chr1	32827472	32827982	chr1
chr1	32827224	32827548	0.345588235294118	-0.06529610296118	0.681818181818182	0.166666666666667	0.461477168113533	0.472765278018163	14	0.0020804399291179	HyperHigh	chr1	32827478	32827558	Intron2	-	FAM229A	protein_coding	chr1	32827478	32827548	0.216049382716049	0.875	CpG: 109	chr1	32826944	32828017	chr1	32827478	32827548	*	*	*	*	*	0	0	chr1-32826525:32828615	chr1	32826525	32828615	chr1	32827478	32827548	chr1-32827525:32828045	chr1	32827525	32828045	chr1
chr1	32929827	32931363	0.10567296996663	0.210693649633537	0.242424242424242	0.0769230769230769	0.557644343957789	0.318144667641655	48	0.00321291685313526	HypoHigh	chr1	32929657	32930657	Promoter	+	RP1-27O5.3	protein_coding	chr1	32929827	32930657	0.540364583333333	0.83	CpG: 54	chr1	32930500	32931061	chr1	32930500	32930657	*	*	*	*	*	0	0	chr1-32929740:32930775	chr1	32929740	32930775	chr1	32929827	32930657	chr1-32930655:32931299	chr1	32930655	32931299	chr1
chr1	32929827	32931363	0.10567296996663	0.210693649633537	0.242424242424242	0.0769230769230769	0.557644343957789	0.318144667641655	48	0.00321291685313526	HypoHigh	chr1	32930658	32930706	FirstExon	+	RP1-27O5.3	protein_coding	chr1	32930658	32930706	0.03125	1	CpG: 54	chr1	32930500	32931061	chr1	32930658	32930706	*	*	*	*	*	0	0	chr1-32929740:32930775	chr1	32929740	32930775	chr1	32930658	32930706	chr1-32930655:32931299	chr1	32930655	32931299	chr1
chr1	32929827	32931363	0.10567296996663	0.210693649633537	0.242424242424242	0.0769230769230769	0.557644343957789	0.318144667641655	48	0.00321291685313526	HypoHigh	chr1	32930707	32936184	Intron1	+	RP1-27O5.3	protein_coding	chr1	32930707	32931363	0.427083333333333	0.119773598685412	CpG: 54	chr1	32930500	32931061	chr1	32930707	32931061	*	*	*	*	*	0	0	chr1-32931185:32931495	chr1	32931185	32931495	chr1	32931185	32931363	chr1-32931326:32931495	chr1	32931326	32931495	chr1
chr1	32929827	32931363	0.10567296996663	0.210693649633537	0.242424242424242	0.0769230769230769	0.557644343957789	0.318144667641655	48	0.00321291685313526	HypoHigh	chr1	32929669	32930669	Promoter	+	ZBTB8B	protein_coding	chr1	32929827	32930669	0.548177083333333	0.842	CpG: 54	chr1	32930500	32931061	chr1	32930500	32930669	*	*	*	*	*	0	0	chr1-32929740:32930775	chr1	32929740	32930775	chr1	32929827	32930669	chr1-32930655:32931299	chr1	32930655	32931299	chr1
chr1	32929827	32931363	0.10567296996663	0.210693649633537	0.242424242424242	0.0769230769230769	0.557644343957789	0.318144667641655	48	0.00321291685313526	HypoHigh	chr1	32930670	32930706	FirstExon	+	ZBTB8B	protein_coding	chr1	32930670	32930706	0.0234375	1	CpG: 54	chr1	32930500	32931061	chr1	32930670	32930706	*	*	*	*	*	0	0	chr1-32929740:32930775	chr1	32929740	32930775	chr1	32930670	32930706	chr1-32930655:32931299	chr1	32930655	32931299	chr1
chr1	32929827	32931363	0.10567296996663	0.210693649633537	0.242424242424242	0.0769230769230769	0.557644343957789	0.318144667641655	48	0.00321291685313526	HypoHigh	chr1	32930707	32936184	Intron1	+	ZBTB8B	protein_coding	chr1	32930707	32931363	0.427083333333333	0.119773598685412	CpG: 54	chr1	32930500	32931061	chr1	32930707	32931061	*	*	*	*	*	0	0	chr1-32931185:32931495	chr1	32931185	32931495	chr1	32931185	32931363	chr1-32931326:32931495	chr1	32931326	32931495	chr1
chr1	33220020	33220744	0.326086956521739	-0.033116111014957	0.685714285714286	0.277777777777778	0.490534087136599	0.583333333333333	22	0.00127579002097236	HyperHigh	chr1	33207791	33233387	Intron1	+	KIAA1522	protein_coding	chr1	33220020	33220744	1	0.0282856696358806	CpG: 61	chr1	33219427	33220028	chr1	33220020	33220028	chr1:33220297-33220575	chr1	33220297	33220575	chr1	33220297	33220575	chr1-33219705:33221295	chr1	33219705	33221295	chr1	33220020	33220744	chr1-33220724:33221028	chr1	33220724	33221028	chr1
chr1	33304258	33307357	0.086111111111111	-0.202511746216154	1	0.891176470588235	0.142218972870857	0.306098611351497	41	1.56138032528533e-06	HypoLow	chr1	33295669	33318679	Intron5	+	S100PBP	protein_coding	chr1	33304258	33307357	1	0.134680573663625	*	*	*	*	*	0	0	*	*	*	*	*	0	0	*	*	*	*	*	0	0	chr1-33304640:33305010	chr1	33304640	33305010	chr1
chr1	33515373	33516471	-0.0909090909090911	0.317611408897475	0.8	0.952380952380952	0.597493750120193	0.167752778258549	12	0.0345280442296126	HypoHigh	*	*	*	InterGenic	*	*	*	*	*	*	*	*	*	*	*	*	*	0	0	chr1:33515825-33516245	chr1	33515825	33516245	chr1	33515825	33516245	chr1-33515805:33516495	chr1	33515805	33516495	chr1	33515805	33516471	chr1-33516250:33516520	chr1	33516250	33516520	chr1
chr1	33804409	33805236	0.276018099547511	0.117768809118436	0.703703703703704	0.285714285714286	0.49830628274465	0.417209722462608	10	0.0216163935621668	HyperHigh	chr1	33799894	33820001	Intron8	-	PHC2	protein_coding	chr1	33804409	33805236	1	0.0411299547421296	*	*	*	*	*	0	0	chr1:33804359-33804743	chr1	33804359	33804743	chr1	33804409	33804743	chr1-33805060:33805330	chr1	33805060	33805330	chr1	33805060	33805236	chr1-33804965:33805351	chr1	33804965	33805351	chr1
chr1	33898674	33906144	0.083333333333333	-0.240642698295787	0.956439393939394	0.833333333333333	0.137938950101211	0.328808909576947	51	2.96345782090559e-07	HypoLow	*	*	*	InterGenic	*	*	*	*	*	*	*	*	*	*	*	*	*	0	0	*	*	*	*	*	0	0	chr1-33905540:33906015	chr1	33905540	33906015	chr1	33905540	33906015	chr1-33905517:33905821	chr1	33905517	33905821	chr1
chr1	34126009	34131133	-0.036038961038961	0.233367344307302	0.906158357771261	0.933035714285715	0.468407176286504	0.185012324958751	49	0.0669352044065973	HypoHigh	chr1	34123738	34128489	Intron5	-	CSMD2	protein_coding	chr1	34126009	34128489	0.4839968774395	0.521995369395917	*	*	*	*	*	0	0	*	*	*	*	*	0	0	chr1-34127760:34127975	chr1	34127760	34127975	chr1	34127760	34127975	chr1-34125960:34126204	chr1	34125960	34126204	chr1
chr1	34126009	34131133	-0.036038961038961	0.233367344307302	0.906158357771261	0.933035714285715	0.468407176286504	0.185012324958751	49	0.0669352044065973	HypoHigh	chr1	34128490	34128692	Exon5	-	CSMD2	protein_coding	chr1	34128490	34128692	0.0394223263075722	1	*	*	*	*	*	0	0	*	*	*	*	*	0	0	*	*	*	*	*	0	0	*	*	*	*	*
chr1	34126009	34131133	-0.036038961038961	0.233367344307302	0.906158357771261	0.933035714285715	0.468407176286504	0.185012324958751	49	0.0669352044065973	HypoHigh	chr1	34128693	34158529	Intron4	-	CSMD2	protein_coding	chr1	34128693	34131133	0.476190476190476	0.0817803995173616	*	*	*	*	*	0	0	chr1:34130973-34131088	chr1	34130973	34131088	chr1	34130973	34131088	chr1-34129685:34129835	chr1	34129685	34129835	chr1	34129685	34129835	chr1-34128981:34129357	chr1	34128981	34129357	chr1
chr1	34179407	34185399	-0.043478260869565	0.229573958513622	0.863636363636364	0.933333333333333	0.486382639009082	0.197224259527442	54	0.00235948061381461	HypoHigh	*	*	*	InterGenic	*	*	*	*	*	*	*	*	*	*	*	*	*	0	0	*	*	*	*	*	0	0	chr1-34185265:34185415	chr1	34185265	34185415	chr1	34185265	34185399	*	*	*	*	*
chr1	34301158	34302354	-0.069444444444444	0.229666450312854	0.833333333333333	0.857142857142857	0.473185432857204	0.306098611351497	20	0.371997317294491	HypoHigh	*	*	*	InterGenic	*	*	*	*	*	*	*	*	*	*	*	*	*	0	0	*	*	*	*	*	0	0	*	*	*	*	*	0	0	*	*	*	*	*
chr1	34451810	34457284	-0.071969696969697	0.232964579512741	0.826086956521739	1	0.494451918327229	0.323650198151556	40	0.00263472292958402	HypoHigh	*	*	*	InterGenic	*	*	*	*	*	*	*	*	*	*	*	*	*	0	0	*	*	*	*	*	0	0	chr1-34453865:34454115	chr1	34453865	34454115	chr1	34453865	34454115	chr1-34452033:34452314	chr1	34452033	34452314	chr1
chr1	34677852	34678722	0.052631578947368	-0.332247221741451	0.91304347826087	0.833333333333333	0.112430022205671	0.554832593066821	12	0.113392333029919	HypoLow	chr1	34677811	34678007	Exon6	+	C1orf94	protein_coding	chr1	34677852	34678007	0.17816091954023	0.790816326530612	*	*	*	*	*	0	0	*	*	*	*	*	0	0	*	*	*	*	*	0	0	chr1-34677611:34677987	chr1	34677611	34677987	chr1
chr1	34677852	34678722	0.052631578947368	-0.332247221741451	0.91304347826087	0.833333333333333	0.112430022205671	0.554832593066821	12	0.113392333029919	HypoLow	chr1	34678008	34684286	Intron6	+	C1orf94	protein_coding	chr1	34678008	34678722	0.820689655172414	0.113730487416375	*	*	*	*	*	0	0	*	*	*	*	*	0	0	chr1-34678280:34678510	chr1	34678280	34678510	chr1	34678280	34678510	chr1-34678283:34678559	chr1	34678283	34678559	chr1
chr1	35028761	35031942	-0.071794871794872	-0.282875566429958	0.358974358974359	0.638888888888889	0.297358741918619	0.63943194468483	21	0.116618588143145	HypoLow	*	*	*	InterGenic	*	*	*	*	*	*	*	*	*	*	*	*	*	0	0	*	*	*	*	*	0	0	chr1-35031125:35031275	chr1	35031125	35031275	chr1	35031125	35031275	*	*	*	*	*
chr1	35226162	35226433	-0.425595238095238	0.529944497599671	0.435817805383023	1	0.704414960595545	0.128337220429779	7	0.00715477722031697	HypoHigh	chr1	35225390	35226533	Intron1	+	GJB4	protein_coding	chr1	35226162	35226433	1	0.237095363079615	*	*	*	*	*	0	0	*	*	*	*	*	0	0	chr1-35226340:35226595	chr1	35226340	35226595	chr1	35226340	35226433	*	*	*	*	*
chr1	35405740	35409999	0.085714285714285	-0.211022464569807	1	0.857142857142857	0.15633186452976	0.382944951426972	24	0.00724766073153247	HypoLow	*	*	*	InterGenic	*	*	*	*	*	*	*	*	*	*	*	*	*	0	0	*	*	*	*	*	0	0	chr1-35409545:35409835	chr1	35409545	35409835	chr1	35409545	35409835	chr1-35407449:35407717	chr1	35407449	35407717	chr1
chr1	36796178	36799292	0.104355716878403	-0.223099834004912	1	0.88	0.123744108880292	0.372643836278798	55	1.05016025322589e-08	HypoLow	*	*	*	InterGenic	*	*	*	*	*	*	*	*	*	*	*	*	*	0	0	*	*	*	*	*	0	0	chr1-36798585:36798735	chr1	36798585	36798735	chr1	36798585	36798735	chr1-36797066:36797768	chr1	36797066	36797768	chr1
chr1	36837010	36837713	0.357142857142857	-0.216179887923444	0.92	0.5	0.350980253520878	0.576524652837874	16	0.000388236359046119	HyperLow	chr1	36826942	36851323	Intron1	-	STK40	protein_coding	chr1	36837010	36837713	1	0.0288339280587343	*	*	*	*	*	0	0	*	*	*	*	*	0	0	chr1-36837085:36837315	chr1	36837085	36837315	chr1	36837085	36837315	chr1-36837395:36837656	chr1	36837395	36837656	chr1
chr1	36852678	36854046	0.0753846153846149	-0.356291807856667	0.954545454545455	0.833333333333333	0.130414521209752	0.459472950906775	18	0.0276760920227077	HypoLow	*	*	*	InterGenic	*	*	*	*	*	*	*	*	*	*	*	*	*	0	0	chr1:36853020-36853462	chr1	36853020	36853462	chr1	36853020	36853462	chr1-36853040:36853495	chr1	36853040	36853495	chr1	36853040	36853495	chr1-36853546:36853926	chr1	36853546	36853926	chr1
chr1	36916158	36916802	0.297058823529412	0.223880118177645	0.605555555555556	0.191666666666666	0.559109272349011	0.375282327976523	21	0.00429293112308406	HyperHigh	chr1	36916053	36917053	Promoter	-	OSCP1	protein_coding	chr1	36916158	36916802	1	0.644	CpG: 46	chr1	36915796	36916324	chr1	36916158	36916324	*	*	*	*	*	0	0	chr1-36916320:36916775	chr1	36916320	36916775	chr1	36916320	36916775	chr1-36916796:36917372	chr1	36916796	36917372	chr1
chr1	37129197	37133053	0.078804347826087	-0.204918835018785	0.923076923076923	0.823529411764706	0.29683054673983	0.5	38	0.00206484038806846	HypoLow	*	*	*	InterGenic	*	*	*	*	*	*	*	*	*	*	*	*	*	0	0	*	*	*	*	*	0	0	chr1-37132980:37133135	chr1	37132980	37133135	chr1	37132980	37133053	chr1-37130532:37130772	chr1	37130532	37130772	chr1
chr1	37415204	37416416	0.100878090366581	-0.388472205835476	0.930588235294117	0.816526610644258	0.301879687409855	0.642434960210927	11	0.118420217161796	HypoLow	chr1	37356698	37499594	Intron1	-	GRIK3	protein_coding	chr1	37415204	37416416	1	0.00848169297950957	*	*	*	*	*	0	0	*	*	*	*	*	0	0	chr1-37416125:37416635	chr1	37416125	37416635	chr1	37416125	37416416	chr1-37416287:37416607	chr1	37416287	37416607	chr1
chr1	37498746	37500789	0.0831481481481481	0.228571561614135	0.1375	0.0363756613756614	0.505268208163356	0.182984811475013	63	2.71119050990844e-06	HypoHigh	chr1	37356698	37499594	Intron1	-	GRIK3	protein_coding	chr1	37498746	37499594	0.415075868820362	0.0059343858470496	CpG: 232	chr1	37498377	37500624	chr1	37498746	37499594	*	*	*	*	*	0	0	chr1-37499345:37499835	chr1	37499345	37499835	chr1	37499345	37499594	chr1-37499425:37499745	chr1	37499425	37499745	chr1
chr1	37498746	37500789	0.0831481481481481	0.228571561614135	0.1375	0.0363756613756614	0.505268208163356	0.182984811475013	63	2.71119050990844e-06	HypoHigh	chr1	37499595	37499726	FirstExon	-	GRIK3	protein_coding	chr1	37499595	37499726	0.0641213901125795	1	CpG: 232	chr1	37498377	37500624	chr1	37499595	37499726	*	*	*	*	*	0	0	chr1-37499345:37499835	chr1	37499345	37499835	chr1	37499595	37499726	chr1-37499425:37499745	chr1	37499425	37499745	chr1
chr1	37498746	37500789	0.0831481481481481	0.228571561614135	0.1375	0.0363756613756614	0.505268208163356	0.182984811475013	63	2.71119050990844e-06	HypoHigh	chr1	37499727	37500727	Promoter	-	GRIK3	protein_coding	chr1	37499727	37500727	0.489476260401371	1	CpG: 232	chr1	37498377	37500624	chr1	37499727	37500624	*	*	*	*	*	0	0	chr1-37499925:37500855	chr1	37499925	37500855	chr1	37499925	37500727	chr1-37500230:37501275	chr1	37500230	37501275	chr1
chr1	37512981	37513262	-0.0375	-0.364019801766825	0.875	0.684210526315789	0.254734835502873	0.590316864818223	8	0.901515151515152	HypoLow	*	*	*	InterGenic	*	*	*	*	*	*	*	*	*	*	*	*	*	0	0	*	*	*	*	*	0	0	chr1-37513145:37513395	chr1	37513145	37513395	chr1	37513145	37513262	*	*	*	*	*
chr1	38367429	38368695	0.165485829959514	-0.233926775888164	0.923076923076923	0.716577540106952	0.182488518892995	0.513867703224415	15	0.0241243923960021	HypoLow	chr1	38357127	38397584	Intron7	-	INPP5B	protein_coding	chr1	38367429	38368695	1	0.0312924833774131	*	*	*	*	*	0	0	*	*	*	*	*	0	0	chr1-38367020:38367515	chr1	38367020	38367515	chr1	38367429	38367515	chr1-38368549:38368921	chr1	38368549	38368921	chr1
chr1	38493622	38495188	0.0740740740740741	-0.227118588837359	0.933333333333333	0.827586206896552	0.289464243003454	0.615479781557005	20	0.021722778302331	HypoLow	*	*	*	InterGenic	*	*	*	*	*	*	*	*	*	*	*	*	*	0	0	*	*	*	*	*	0	0	chr1-38494625:38495315	chr1	38494625	38495315	chr1	38494625	38495188	chr1-38495027:38495371	chr1	38495027	38495371	chr1
chr1	38657633	38661887	0.0954545454545455	-0.284220760056181	1	0.882352941176471	0.107585652965799	0.419042363126714	45	7.66757823217877e-09	HypoLow	*	*	*	InterGenic	*	*	*	*	*	*	*	*	*	*	*	*	*	0	0	*	*	*	*	*	0	0	chr1-38661765:38662055	chr1	38661765	38662055	chr1	38661765	38661887	chr1-38658670:38659186	chr1	38658670	38659186	chr1
chr1	38736225	38736772	0.290789473684211	-0.138686674636344	0.891176470588235	0.588095238095238	0.415596544228121	0.491710461180406	9	0.0156377912348736	HyperLow	*	*	*	InterGenic	*	*	*	*	*	*	*	*	*	*	*	*	*	0	0	*	*	*	*	*	0	0	chr1-38736680:38736935	chr1	38736680	38736935	chr1	38736680	38736772	chr1-38736339:38736426	chr1	38736339	38736426	chr1
chr1	39501025	39504789	0.055555555555556	-0.21340214445349	1	0.916666666666667	0	0.270426041486378	46	7.44217978317935e-07	HypoLow	*	*	*	InterGenic	*	*	*	*	*	*	*	*	*	*	*	*	*	0	0	*	*	*	*	*	0	0	chr1-39504485:39504735	chr1	39504485	39504735	chr1	39504485	39504735	chr1-39504508:39504673	chr1	39504508	39504673	chr1
chr1	39673112	39679420	0.085526315789474	-0.21061242507999	0.941176470588235	0.85	0.254734835502873	0.498880254062286	72	2.63187613995022e-07	HypoLow	chr1	39550111	39696853	Intron1	+	MACF1	protein_coding	chr1	39673112	39679420	1	0.0429870112169658	*	*	*	*	*	0	0	*	*	*	*	*	0	0	chr1-39679185:39680435	chr1	39679185	39680435	chr1	39679185	39679420	chr1-39679397:39679978	chr1	39679397	39679978	chr1
chr1	39825784	39829343	0.117647058823529	-0.259759271957448	0.952380952380952	0.85	0.167752778258549	0.486382639009082	22	0.000523405058015501	HypoLow	chr1	39824937	39826464	Intron47	+	MACF1	protein_coding	chr1	39825784	39826464	0.191064905872436	0.445317616240995	*	*	*	*	*	0	0	*	*	*	*	*	0	0	chr1-39825880:39826035	chr1	39825880	39826035	chr1	39825880	39826035	chr1-39826456:39826726	chr1	39826456	39826726	chr1
chr1	39825784	39829343	0.117647058823529	-0.259759271957448	0.952380952380952	0.85	0.167752778258549	0.486382639009082	22	0.000523405058015501	HypoLow	chr1	39826465	39826673	Exon48	+	MACF1	protein_coding	chr1	39826465	39826673	0.0584433829727452	1	*	*	*	*	*	0	0	*	*	*	*	*	0	0	chr1-39826500:39826730	chr1	39826500	39826730	chr1	39826500	39826673	chr1-39826483:39826756	chr1	39826483	39826756	chr1
chr1	39825784	39829343	0.117647058823529	-0.259759271957448	0.952380952380952	0.85	0.167752778258549	0.486382639009082	22	0.000523405058015501	HypoLow	chr1	39826674	39827031	Intron48	+	MACF1	protein_coding	chr1	39826674	39827031	0.100309075583029	1	*	*	*	*	*	0	0	*	*	*	*	*	0	0	chr1-39826500:39826730	chr1	39826500	39826730	chr1	39826674	39826730	chr1-39826483:39826756	chr1	39826483	39826756	chr1
chr1	39825784	39829343	0.117647058823529	-0.259759271957448	0.952380952380952	0.85	0.167752778258549	0.486382639009082	22	0.000523405058015501	HypoLow	chr1	39827032	39827349	Exon49	+	MACF1	protein_coding	chr1	39827032	39827349	0.0890699634728856	1	*	*	*	*	*	0	0	*	*	*	*	*	0	0	chr1-39827220:39827410	chr1	39827220	39827410	chr1	39827220	39827349	*	*	*	*	*
chr1	39825784	39829343	0.117647058823529	-0.259759271957448	0.952380952380952	0.85	0.167752778258549	0.486382639009082	22	0.000523405058015501	HypoLow	chr1	39827350	39833819	Intron49	+	MACF1	protein_coding	chr1	39827350	39829343	0.55998876088789	0.308084711701963	*	*	*	*	*	0	0	*	*	*	*	*	0	0	chr1-39829085:39829235	chr1	39829085	39829235	chr1	39829085	39829235	chr1-39829000:39829278	chr1	39829000	39829278	chr1
chr1	40149431	40149805	0.256295377263119	-0.0155635097942179	0.774813895781638	0.42911877394636	0.628485792842238	0.634607873555227	13	0.00423144070414601	HyperHigh	chr1	40148406	40149608	Intron3	-	HPCAL4	protein_coding	chr1	40149431	40149608	0.473262032085562	0.147254575707155	CpG: 62	chr1	40149431	40150013	chr1	40149431	40149608	*	*	*	*	*	0	0	chr1-40149260:40150075	chr1	40149260	40150075	chr1	40149431	40149608	chr1-40149583:40149913	chr1	40149583	40149913	chr1
chr1	40149431	40149805	0.256295377263119	-0.0155635097942179	0.774813895781638	0.42911877394636	0.628485792842238	0.634607873555227	13	0.00423144070414601	HyperHigh	chr1	40149609	40149824	Exon3	-	HPCAL4	protein_coding	chr1	40149609	40149805	0.524064171122995	0.911627906976744	CpG: 62	chr1	40149431	40150013	chr1	40149609	40149805	*	*	*	*	*	0	0	chr1-40149260:40150075	chr1	40149260	40150075	chr1	40149609	40149805	chr1-40149583:40149913	chr1	40149583	40149913	chr1
chr1	40707657	40708058	0.174568965517241	-0.307309364962454	0.888888888888889	0.6875	0.267690575774701	0.43810682890206	10	0.0244343891402715	HypoLow	*	*	*	InterGenic	*	*	*	*	*	*	*	*	*	*	*	*	*	0	0	*	*	*	*	*	0	0	chr1-40707885:40708310	chr1	40707885	40708310	chr1	40707885	40708058	chr1-40708056:40708452	chr1	40708056	40708452	chr1
chr1	40888356	40889041	0.283333333333333	-0.047714867133729	0.714285714285714	0.3	0.459594497828725	0.507309364962454	14	0.00758821359156791	HyperHigh	*	*	*	InterGenic	*	*	*	*	*	*	*	*	*	*	*	*	*	0	0	*	*	*	*	*	0	0	chr1-40888905:40889175	chr1	40888905	40889175	chr1	40888905	40889041	chr1-40888927:40889205	chr1	40888927	40889205	chr1
chr1	41089788	41091163	-0.233333333333333	0.263952784189161	0.764705882352941	0.928571428571429	0.453509103814569	0.197224259527442	14	0.0509397617638003	HypoHigh	chr1	41086351	41092401	LastExon	-	RIMS3	protein_coding	chr1	41089788	41091163	1	0.227272727272727	*	*	*	*	*	0	0	*	*	*	*	*	0	0	chr1-41090800:41091175	chr1	41090800	41091175	chr1	41090800	41091163	chr1-41090797:41091086	chr1	41090797	41091086	chr1
chr1	41349665	41350151	0.287878787878788	0.051497231923578	0.5	0.176470588235294	0.556393445622244	0.510164352252494	20	9.9819479990676e-07	HyperHigh	*	*	*	InterGenic	*	*	*	*	*	*	*	*	CpG: 67	chr1	41349740	41350293	chr1	41349740	41350151	*	*	*	*	*	0	0	chr1-41349745:41350375	chr1	41349745	41350375	chr1	41349745	41350151	chr1-41349809:41350121	chr1	41349809	41350121	chr1
chr1	41819195	41822427	0.111111111111111	-0.240642698295787	0.961538461538462	0.846153846153846	0	0.323650198151556	30	0.02706954986703	HypoLow	*	*	*	InterGenic	*	*	*	*	*	*	*	*	*	*	*	*	*	0	0	*	*	*	*	*	0	0	chr1-41821385:41821535	chr1	41821385	41821535	chr1	41821385	41821535	chr1-41822423:41822839	chr1	41822423	41822839	chr1
chr1	41828100	41829228	0.106227106227106	0.225678099654953	0.247596153846154	0.0958333333333334	0.484660592125405	0.306098611351497	17	0.11496331145512	HypoHigh	chr1	41828017	41847287	Intron1	+	FOXO6	protein_coding	chr1	41828100	41829228	1	0.0585365853658537	CpG: 158	chr1	41826680	41828290	chr1	41828100	41828290	chr1:41828934-41829164	chr1	41828934	41829164	chr1	41828934	41829164	chr1-41828885:41830075	chr1	41828885	41830075	chr1	41828885	41829228	chr1-41828275:41828605	chr1	41828275	41828605	chr1
chr1	42248807	42249436	-0.291666666666667	0.01006678936467	0.272727272727273	0.615384615384615	0.45698353148489	0.5	10	0.0268789326791953	HypoHigh	chr1	42094619	42384083	Intron1	-	HIVEP3	protein_coding	chr1	42248807	42249436	1	0.00217298178702706	*	*	*	*	*	0	0	chr1:42248889-42249252	chr1	42248889	42249252	chr1	42248889	42249252	chr1-42249425:42249575	chr1	42249425	42249575	chr1	42249425	42249436	chr1-42249003:42249353	chr1	42249003	42249353	chr1
chr1	42299195	42308746	0.08	-0.236382639009081	0.961538461538462	0.869565217391304	0.189665197863094	0.425871145606372	80	1.58247375511154e-09	HypoLow	chr1	42094619	42384083	Intron1	-	HIVEP3	protein_coding	chr1	42299195	42308746	1	0.0329954674847304	*	*	*	*	*	0	0	*	*	*	*	*	0	0	chr1-42308525:42308890	chr1	42308525	42308890	chr1	42308525	42308746	chr1-42308599:42309725	chr1	42308599	42309725	chr1
chr1	42373920	42383081	0.119047619047619	-0.270426041486378	1	0.842105263157895	0	0.432931646898466	38	8.09936172467206e-06	HypoLow	chr1	42094619	42384083	Intron1	-	HIVEP3	protein_coding	chr1	42373920	42383081	1	0.031648149683553	*	*	*	*	*	0	0	*	*	*	*	*	0	0	chr1-42382860:42383335	chr1	42382860	42383335	chr1	42382860	42383081	chr1-42383051:42384161	chr1	42383051	42384161	chr1
chr1	42525520	42529913	0.1	-0.247654266381135	0.96551724137931	0.875	0.216674140549451	0.402506249879807	32	0.000298882170443248	HypoLow	*	*	*	InterGenic	*	*	*	*	*	*	*	*	*	*	*	*	*	0	0	*	*	*	*	*	0	0	*	*	*	*	*	0	0	*	*	*	*	*
chr1	43251326	43262364	0.052459580323357	-0.21484076760178	0.96	0.888888888888889	0.158529130631926	0.364170888973919	89	7.11793406124437e-10	HypoLow	*	*	*	InterGenic	*	*	*	*	*	*	*	*	*	*	*	*	*	0	0	*	*	*	*	*	0	0	chr1-43261720:43261875	chr1	43261720	43261875	chr1	43261720	43261875	chr1-43259579:43259792	chr1	43259579	43259792	chr1
chr1	43408200	43412045	0.083333333333333	-0.205024786742044	0.872282608695652	0.735087719298245	0.270426041486378	0.453581893147898	49	0.00659114120968045	HypoLow	chr1	43396878	43408896	Intron2	-	SLC2A1	protein_coding	chr1	43408200	43408896	0.181014304291287	0.0579131303045432	*	*	*	*	*	0	0	*	*	*	*	*	0	0	chr1-43408105:43408495	chr1	43408105	43408495	chr1	43408200	43408495	chr1-43408895:43409419	chr1	43408895	43409419	chr1
chr1	43408200	43412045	0.083333333333333	-0.205024786742044	0.872282608695652	0.735087719298245	0.270426041486378	0.453581893147898	49	0.00659114120968045	HypoLow	chr1	43408897	43408992	Exon2	-	SLC2A1	protein_coding	chr1	43408897	43408992	0.0247074122236671	1	*	*	*	*	*	0	0	*	*	*	*	*	0	0	chr1-43408900:43409215	chr1	43408900	43409215	chr1	43408900	43408992	chr1-43408984:43409201	chr1	43408984	43409201	chr1
chr1	43408200	43412045	0.083333333333333	-0.205024786742044	0.872282608695652	0.735087719298245	0.270426041486378	0.453581893147898	49	0.00659114120968045	HypoLow	chr1	43408993	43424304	Intron1	-	SLC2A1	protein_coding	chr1	43408993	43412045	0.793758127438231	0.199333812291816	*	*	*	*	*	0	0	*	*	*	*	*	0	0	chr1-43411700:43412030	chr1	43411700	43412030	chr1	43411700	43412030	chr1-43412040:43412724	chr1	43412040	43412724	chr1
chr1	43420899	43423194	0.166666666666667	-0.24132935261404	0.928571428571429	0.761904761904762	0.249194893274858	0.476637056991957	34	2.90218739258683e-08	HypoLow	chr1	43408993	43424304	Intron1	-	SLC2A1	protein_coding	chr1	43420899	43423194	1	0.149892234341323	*	*	*	*	*	0	0	*	*	*	*	*	0	0	chr1-43422480:43423275	chr1	43422480	43423275	chr1	43422480	43423194	chr1-43423191:43423933	chr1	43423191	43423933	chr1
chr1	43425221	43425931	0.129186602870814	-0.252351000973893	0.947368421052632	0.818181818181818	0.17418645817898	0.440535652796116	16	0.00944377213859294	HypoLow	chr1	43424502	43425502	Promoter	-	SLC2A1	protein_coding	chr1	43425221	43425502	0.395774647887324	0.281	*	*	*	*	*	0	0	*	*	*	*	*	0	0	chr1-43424480:43425415	chr1	43424480	43425415	chr1	43425221	43425415	chr1-43425483:43425939	chr1	43425483	43425939	chr1
chr1	43425221	43425931	0.129186602870814	-0.252351000973893	0.947368421052632	0.818181818181818	0.17418645817898	0.440535652796116	16	0.00944377213859294	HypoLow	chr1	43424720	43425248	FirstExon	+	SLC2A1-AS1	lincRNA	chr1	43425221	43425248	0.0380281690140845	0.0511363636363636	*	*	*	*	*	0	0	*	*	*	*	*	0	0	chr1-43424480:43425415	chr1	43424480	43425415	chr1	43425221	43425248	chr1-43425237:43425633	chr1	43425237	43425633	chr1
chr1	43425221	43425931	0.129186602870814	-0.252351000973893	0.947368421052632	0.818181818181818	0.17418645817898	0.440535652796116	16	0.00944377213859294	HypoLow	chr1	43425249	43435919	Intron1	+	SLC2A1-AS1	lincRNA	chr1	43425249	43425931	0.96056338028169	0.0639175257731959	*	*	*	*	*	0	0	*	*	*	*	*	0	0	chr1-43425640:43425870	chr1	43425640	43425870	chr1	43425640	43425870	chr1-43425698:43425793	chr1	43425698	43425793	chr1
chr1	43488250	43492718	0.062650966183575	-0.213718804785863	0.977272727272728	0.875	0.15633186452976	0.372504999487784	55	1.52557746661363e-07	HypoLow	*	*	*	InterGenic	*	*	*	*	*	*	*	*	*	*	*	*	*	0	0	*	*	*	*	*	0	0	chr1-43491725:43491875	chr1	43491725	43491875	chr1	43491725	43491875	chr1-43491890:43492310	chr1	43491890	43492310	chr1
chr1	43814472	43815385	0.244154800580632	0.116954710710339	0.602631578947368	0.359237536656892	0.468112061926264	0.365095037713412	29	1.61263385013242e-08	HyperHigh	chr1	43812606	43814513	Intron8	+	MPL	protein_coding	chr1	43814472	43814513	0.0449069003285871	0.0214997378080755	CpG: 76	chr1	43814305	43815277	chr1	43814472	43814513	*	*	*	*	*	0	0	chr1-43814485:43815315	chr1	43814485	43815315	chr1	43814485	43814513	chr1-43814509:43814664	chr1	43814509	43814664	chr1
chr1	43814472	43815385	0.244154800580632	0.116954710710339	0.602631578947368	0.359237536656892	0.468112061926264	0.365095037713412	29	1.61263385013242e-08	HyperHigh	chr1	43814514	43814673	Exon9	+	MPL	protein_coding	chr1	43814514	43814673	0.174151150054765	1	CpG: 76	chr1	43814305	43815277	chr1	43814514	43814673	*	*	*	*	*	0	0	chr1-43814485:43815315	chr1	43814485	43815315	chr1	43814514	43814673	chr1-43814659:43815335	chr1	43814659	43815335	chr1
chr1	43814472	43815385	0.244154800580632	0.116954710710339	0.602631578947368	0.359237536656892	0.468112061926264	0.365095037713412	29	1.61263385013242e-08	HyperHigh	chr1	43814674	43814933	Intron9	+	MPL	protein_coding	chr1	43814674	43814933	0.28368017524644	1	CpG: 76	chr1	43814305	43815277	chr1	43814674	43814933	*	*	*	*	*	0	0	chr1-43814485:43815315	chr1	43814485	43815315	chr1	43814674	43814933	chr1-43814926:43815326	chr1	43814926	43815326	chr1
chr1	43814472	43815385	0.244154800580632	0.116954710710339	0.602631578947368	0.359237536656892	0.468112061926264	0.365095037713412	29	1.61263385013242e-08	HyperHigh	chr1	43814934	43815030	Exon10	+	MPL	protein_coding	chr1	43814934	43815030	0.105147864184009	1	CpG: 76	chr1	43814305	43815277	chr1	43814934	43815030	*	*	*	*	*	0	0	chr1-43814485:43815315	chr1	43814485	43815315	chr1	43814934	43815030	chr1-43815029:43815576	chr1	43815029	43815576	chr1
chr1	43814472	43815385	0.244154800580632	0.116954710710339	0.602631578947368	0.359237536656892	0.468112061926264	0.365095037713412	29	1.61263385013242e-08	HyperHigh	chr1	43815031	43817886	Intron10	+	MPL	protein_coding	chr1	43815031	43815385	0.387732749178532	0.12399299474606	CpG: 76	chr1	43814305	43815277	chr1	43815031	43815277	*	*	*	*	*	0	0	chr1-43814485:43815315	chr1	43814485	43815315	chr1	43815031	43815315	chr1-43815222:43815442	chr1	43815222	43815442	chr1
chr1	43918932	43919126	0.328320802005013	0.464717312494886	0.423076923076923	0.0526315789473684	0.660498776509558	0.167752778258549	8	0.0406919393973458	HyperHigh	chr1	43917991	43919056	Intron2	-	HYI	protein_coding	chr1	43918932	43919056	0.639175257731959	0.116431924882629	*	*	*	*	*	0	0	*	*	*	*	*	0	0	chr1-43918425:43919775	chr1	43918425	43919775	chr1	43918932	43919056	chr1-43919046:43919566	chr1	43919046	43919566	chr1
chr1	43918932	43919126	0.328320802005013	0.464717312494886	0.423076923076923	0.0526315789473684	0.660498776509558	0.167752778258549	8	0.0406919393973458	HyperHigh	chr1	43919057	43919168	Exon2	-	HYI	protein_coding	chr1	43919057	43919126	0.355670103092784	0.621621621621622	CpG: 78	chr1	43919083	43919814	chr1	43919083	43919126	*	*	*	*	*	0	0	chr1-43918425:43919775	chr1	43918425	43919775	chr1	43919057	43919126	chr1-43919084:43920136	chr1	43919084	43920136	chr1
chr1	43918932	43919126	0.328320802005013	0.464717312494886	0.423076923076923	0.0526315789473684	0.660498776509558	0.167752778258549	8	0.0406919393973458	HyperHigh	chr1	43918597	43919597	Promoter	+	HYI-AS1	antisense	chr1	43918932	43919126	1	0.194	CpG: 78	chr1	43919083	43919814	chr1	43919083	43919126	*	*	*	*	*	0	0	chr1-43918425:43919775	chr1	43918425	43919775	chr1	43918932	43919126	chr1-43919084:43920136	chr1	43919084	43920136	chr1
chr1	44066541	44067758	0.0983193277310925	-0.382986477733383	0.984848484848485	0.836120401337793	0	0.432376130822287	19	0.000354074143167465	HypoLow	chr1	44064585	44067741	Intron13	+	PTPRF	protein_coding	chr1	44066541	44067741	0.986031224322104	0.380228136882129	*	*	*	*	*	0	0	*	*	*	*	*	0	0	chr1-44067165:44067615	chr1	44067165	44067615	chr1	44067165	44067615	chr1-44067454:44067858	chr1	44067454	44067858	chr1
chr1	44066541	44067758	0.0983193277310925	-0.382986477733383	0.984848484848485	0.836120401337793	0	0.432376130822287	19	0.000354074143167465	HypoLow	chr1	44067742	44067768	Exon14	+	PTPRF	protein_coding	chr1	44067742	44067758	0.0131470829909614	0.615384615384615	*	*	*	*	*	0	0	*	*	*	*	*	0	0	*	*	*	*	*	0	0	chr1-44067454:44067858	chr1	44067454	44067858	chr1
chr1	44451216	44452834	0.136363636363636	-0.237287732002316	1	0.863636363636364	0	0.333333333333333	20	0.000327849782634915	HypoLow	chr1	44451189	44451293	Exon6	+	B4GALT2	protein_coding	chr1	44451216	44451293	0.0475896168108776	0.740384615384615	*	*	*	*	*	0	0	*	*	*	*	*	0	0	chr1-44450925:44451295	chr1	44450925	44451295	chr1	44451216	44451293	*	*	*	*	*
chr1	44451216	44452834	0.136363636363636	-0.237287732002316	1	0.863636363636364	0	0.333333333333333	20	0.000327849782634915	HypoLow	chr1	44451294	44455969	Intron6	+	B4GALT2	protein_coding	chr1	44451294	44452834	0.951792336217553	0.329411764705882	*	*	*	*	*	0	0	*	*	*	*	*	0	0	chr1-44452625:44452775	chr1	44452625	44452775	chr1	44452625	44452775	chr1-44452791:44453047	chr1	44452791	44453047	chr1
chr1	44875731	44882383	-0.113636363636364	-0.245838938745421	0.0588235294117647	0.166666666666667	0.24484330714649	0.515531188098313	82	3.86504210922409e-08	HypoLow	chr1	44871199	44877652	Intron1	+	RNF220	protein_coding	chr1	44875731	44877652	0.288785327720986	0.297690996435766	*	*	*	*	*	0	0	*	*	*	*	*	0	0	chr1-44877565:44877910	chr1	44877565	44877910	chr1	44877565	44877652	chr1-44877587:44877863	chr1	44877587	44877863	chr1
chr1	44875731	44882383	-0.113636363636364	-0.245838938745421	0.0588235294117647	0.166666666666667	0.24484330714649	0.515531188098313	82	3.86504210922409e-08	HypoLow	chr1	44877653	44878394	Exon2	+	RNF220	protein_coding	chr1	44877653	44878394	0.111395069152135	1	*	*	*	*	*	0	0	*	*	*	*	*	0	0	chr1-44878385:44878590	chr1	44878385	44878590	chr1	44878385	44878394	chr1-44878063:44879505	chr1	44878063	44879505	chr1
chr1	44875731	44882383	-0.113636363636364	-0.245838938745421	0.0588235294117647	0.166666666666667	0.24484330714649	0.515531188098313	82	3.86504210922409e-08	HypoLow	chr1	44878395	45079836	Intron2	+	RNF220	protein_coding	chr1	44878395	44882383	0.599518941671678	0.0197973600210483	*	*	*	*	*	0	0	*	*	*	*	*	0	0	chr1-44882065:44882475	chr1	44882065	44882475	chr1	44882065	44882383	chr1-44881376:44881616	chr1	44881376	44881616	chr1
chr1	45190024	45190551	-0.395085470085471	-0.00884698719748095	0.178409090909091	0.727453580901857	0.59586488017301	0.635258170071549	19	0.000132245741834835	HypoHigh	chr1	45189992	45190064	Exon9	+	C1orf228	protein_coding	chr1	45190024	45190064	0.0759013282732448	0.555555555555556	CpG: 79	chr1	45189705	45190558	chr1	45190024	45190064	*	*	*	*	*	0	0	chr1-45189585:45190335	chr1	45189585	45190335	chr1	45190024	45190064	chr1-45189702:45190098	chr1	45189702	45190098	chr1
chr1	45190024	45190551	-0.395085470085471	-0.00884698719748095	0.178409090909091	0.727453580901857	0.59586488017301	0.635258170071549	19	0.000132245741834835	HypoHigh	chr1	45190065	45190210	Intron9	+	C1orf228	protein_coding	chr1	45190065	45190210	0.275142314990512	1	CpG: 79	chr1	45189705	45190558	chr1	45190065	45190210	*	*	*	*	*	0	0	chr1-45189585:45190335	chr1	45189585	45190335	chr1	45190065	45190210	chr1-45189702:45190098	chr1	45189702	45190098	chr1
chr1	45190024	45190551	-0.395085470085471	-0.00884698719748095	0.178409090909091	0.727453580901857	0.59586488017301	0.635258170071549	19	0.000132245741834835	HypoHigh	chr1	45190211	45190340	Exon10	+	C1orf228	protein_coding	chr1	45190211	45190340	0.244781783681214	1	CpG: 79	chr1	45189705	45190558	chr1	45190211	45190340	*	*	*	*	*	0	0	chr1-45189585:45190335	chr1	45189585	45190335	chr1	45190211	45190335	chr1-45190256:45190500	chr1	45190256	45190500	chr1
chr1	45190024	45190551	-0.395085470085471	-0.00884698719748095	0.178409090909091	0.727453580901857	0.59586488017301	0.635258170071549	19	0.000132245741834835	HypoHigh	chr1	45190341	45190433	Intron10	+	C1orf228	protein_coding	chr1	45190341	45190433	0.174573055028463	1	CpG: 79	chr1	45189705	45190558	chr1	45190341	45190433	*	*	*	*	*	0	0	chr1-45190365:45190915	chr1	45190365	45190915	chr1	45190365	45190433	chr1-45190373:45190710	chr1	45190373	45190710	chr1
chr1	45190024	45190551	-0.395085470085471	-0.00884698719748095	0.178409090909091	0.727453580901857	0.59586488017301	0.635258170071549	19	0.000132245741834835	HypoHigh	chr1	45190434	45190511	Exon11	+	C1orf228	protein_coding	chr1	45190434	45190511	0.146110056925996	1	CpG: 79	chr1	45189705	45190558	chr1	45190434	45190511	*	*	*	*	*	0	0	chr1-45190365:45190915	chr1	45190365	45190915	chr1	45190434	45190511	chr1-45190373:45190710	chr1	45190373	45190710	chr1
chr1	45190024	45190551	-0.395085470085471	-0.00884698719748095	0.178409090909091	0.727453580901857	0.59586488017301	0.635258170071549	19	0.000132245741834835	HypoHigh	chr1	45190512	45190807	Intron11	+	C1orf228	protein_coding	chr1	45190512	45190551	0.0740037950664137	0.132203389830508	CpG: 79	chr1	45189705	45190558	chr1	45190512	45190551	*	*	*	*	*	0	0	chr1-45190365:45190915	chr1	45190365	45190915	chr1	45190512	45190551	chr1-45190373:45190710	chr1	45190373	45190710	chr1
chr1	45751562	45755804	0.071428571428571	-0.236021574729409	1	0.909090909090909	0	0.328808909576947	26	0.000530821417913689	HypoLow	chr1	45553910	45769598	Intron2	-	ZSWIM5	protein_coding	chr1	45751562	45755804	1	0.0196672972070769	*	*	*	*	*	0	0	*	*	*	*	*	0	0	*	*	*	*	*	0	0	*	*	*	*	*
chr1	46955866	46956399	0.182380952380952	0.290397549851657	0.341666666666666	0.071256038647343	0.599584904233835	0.372504999487784	21	0.00204868447200303	HypoHigh	*	*	*	InterGenic	*	*	*	*	*	*	*	*	CpG: 175	chr1	46954793	46957121	chr1	46955866	46956399	chr1:46955737-46955918	chr1	46955737	46955918	chr1	46955866	46955918	chr1-46955585:46956995	chr1	46955585	46956995	chr1	46955866	46956399	chr1-46956394:46957170	chr1	46956394	46957170	chr1
chr1	47276553	47278264	-0.078947368421053	0.245739940713295	0.888888888888889	1	0.444273468195007	0.137938950101211	18	0.00284354934477536	HypoHigh	*	*	*	InterGenic	*	*	*	*	*	*	*	*	*	*	*	*	*	0	0	*	*	*	*	*	0	0	chr1-47277685:47277835	chr1	47277685	47277835	chr1	47277685	47277835	chr1-47277722:47277986	chr1	47277722	47277986	chr1
chr1	48976515	48981901	-0.122046119797245	0.215038142501471	0.791304347826087	0.911654135338346	0.457059078027703	0.186271296777067	33	0.00189958164321455	HypoHigh	*	*	*	InterGenic	*	*	*	*	*	*	*	*	*	*	*	*	*	0	0	*	*	*	*	*	0	0	chr1-48978000:48978150	chr1	48978000	48978150	chr1	48978000	48978150	*	*	*	*	*
chr1	49889558	49894101	-0.210649350649351	0.164436569033857	0.6	0.884444444444444	0.596774275165125	0.470655816047343	29	0.00049432873224308	HypoHigh	chr1	49711537	50162984	Intron3	-	AGBL4	protein_coding	chr1	49889558	49894101	1	0.0100631967872198	*	*	*	*	*	0	0	*	*	*	*	*	0	0	chr1-49890520:49890770	chr1	49890520	49890770	chr1	49890520	49890770	chr1-49893439:49893819	chr1	49893439	49893819	chr1
chr1	49889558	49894101	-0.210649350649351	0.164436569033857	0.6	0.884444444444444	0.596774275165125	0.470655816047343	29	0.00049432873224308	HypoHigh	chr1	49888807	49935470	Intron2	-	AGBL4-IT1	sense_intronic	chr1	49889558	49894101	1	0.0973576495296059	*	*	*	*	*	0	0	*	*	*	*	*	0	0	chr1-49890520:49890770	chr1	49890520	49890770	chr1	49890520	49890770	chr1-49893439:49893819	chr1	49893439	49893819	chr1
chr1	49953528	49954709	0.1	-0.277234721981836	0.894736842105263	0.692307692307692	0.287706856188877	0.583333333333333	8	0.405199602013337	HypoLow	chr1	49711537	50162984	Intron3	-	AGBL4	protein_coding	chr1	49953528	49954709	1	0.0026160324467767	*	*	*	*	*	0	0	*	*	*	*	*	0	0	*	*	*	*	*	0	0	*	*	*	*	*
chr1	49974848	49988834	-0.218253968253968	0.228048060028617	0.741830065359477	1	0.458289014656807	0	25	0.000356203337955646	HypoHigh	chr1	49711537	50162984	Intron3	-	AGBL4	protein_coding	chr1	49974848	49988834	1	0.0309803808641989	*	*	*	*	*	0	0	*	*	*	*	*	0	0	*	*	*	*	*	0	0	*	*	*	*	*
chr1	50266282	50271480	0.011705685618729	-0.290051541084599	0.894736842105263	0.782608695652174	0.399397470347699	0.676468981721867	26	0.221475368376153	HypoLow	chr1	50163110	50317067	Intron2	-	AGBL4	protein_coding	chr1	50266282	50271480	1	0.0337626739933878	*	*	*	*	*	0	0	*	*	*	*	*	0	0	*	*	*	*	*	0	0	chr1-50269922:50270322	chr1	50269922	50270322	chr1
chr1	50513702	50514198	0.308235867446393	0.126267068177792	0.446428571428572	0.225	0.574816038404518	0.505594224027951	19	0.0098931415085148	HyperHigh	*	*	*	InterGenic	*	*	*	*	*	*	*	*	CpG: 71	chr1	50513644	50514320	chr1	50513702	50514198	*	*	*	*	*	0	0	chr1-50514140:50514290	chr1	50514140	50514290	chr1	50514140	50514198	chr1-50514141:50514381	chr1	50514141	50514381	chr1
chr1	50887929	50889293	0.25	0.209192195439763	0.541666666666667	0.15	0.660275312076359	0.452259883149013	46	1.40252610015555e-06	HyperHigh	chr1	50887217	50888787	Intron1	-	DMRTA2	protein_coding	chr1	50887929	50888787	0.629032258064516	0.546496815286624	CpG: 480	chr1	50884228	50891471	chr1	50887929	50888787	*	*	*	*	*	0	0	chr1-50887765:50888915	chr1	50887765	50888915	chr1	50887929	50888787	chr1-50888540:50889462	chr1	50888540	50889462	chr1
chr1	50887929	50889293	0.25	0.209192195439763	0.541666666666667	0.15	0.660275312076359	0.452259883149013	46	1.40252610015555e-06	HyperHigh	chr1	50888788	50889172	FirstExon	-	DMRTA2	protein_coding	chr1	50888788	50889172	0.281524926686217	1	CpG: 480	chr1	50884228	50891471	chr1	50888788	50889172	*	*	*	*	*	0	0	chr1-50889020:50890435	chr1	50889020	50890435	chr1	50889020	50889172	chr1-50889136:50889636	chr1	50889136	50889636	chr1
chr1	50887929	50889293	0.25	0.209192195439763	0.541666666666667	0.15	0.660275312076359	0.452259883149013	46	1.40252610015555e-06	HyperHigh	chr1	50889173	50890173	Promoter	-	DMRTA2	protein_coding	chr1	50889173	50889293	0.0879765395894428	0.12	CpG: 480	chr1	50884228	50891471	chr1	50889173	50889293	*	*	*	*	*	0	0	chr1-50889020:50890435	chr1	50889020	50890435	chr1	50889173	50889293	chr1-50889136:50889636	chr1	50889136	50889636	chr1
chr1	51339018	51339560	-0.272727272727273	-0.192003325041403	0.121428571428571	0.5	0.381367642888093	0.583333333333333	9	0.011534237470832	HypoLow	chr1	51323670	51425438	Intron1	-	FAF1	protein_coding	chr1	51339018	51339560	1	0.00532583916358777	*	*	*	*	*	0	0	*	*	*	*	*	0	0	chr1-51339100:51339595	chr1	51339100	51339595	chr1	51339100	51339560	chr1-51339497:51339901	chr1	51339497	51339901	chr1
chr1	51791280	51791724	-0.263975155279503	-0.253375183494834	0.0217391304347826	0.345238095238095	0.123744108880292	0.359512229910011	9	0.00948439343097899	HypoLow	chr1	51787498	51810662	Intron1	-	TTC39A	protein_coding	chr1	51791280	51791724	1	0.0191676739768606	*	*	*	*	*	0	0	*	*	*	*	*	0	0	chr1-51791320:51791835	chr1	51791320	51791835	chr1	51791320	51791724	chr1-51791709:51792159	chr1	51791709	51792159	chr1
chr1	51985629	51987329	0.176428571428571	-0.40830218588327	0.948412698412698	0.708333333333333	0.193570846968145	0.553706750950892	15	0.014568657587439	HypoLow	chr1	51985001	51986001	Promoter	-	EPS15	protein_coding	chr1	51985629	51986001	0.218823529411765	0.372	*	*	*	*	*	0	0	*	*	*	*	*	0	0	chr1-51985580:51985850	chr1	51985580	51985850	chr1	51985629	51985850	chr1-51986000:51986978	chr1	51986000	51986978	chr1
chr1	51985629	51987329	0.176428571428571	-0.40830218588327	0.948412698412698	0.708333333333333	0.193570846968145	0.553706750950892	15	0.014568657587439	HypoLow	chr1	51984119	52026556	Intron1	+	RP11-191G24.1	antisense	chr1	51985629	51987329	1	0.0400593821429413	*	*	*	*	*	0	0	chr1:51986075-51986410	chr1	51986075	51986410	chr1	51986075	51986410	chr1-51986060:51986975	chr1	51986060	51986975	chr1	51986060	51986975	chr1-51986713:51987223	chr1	51986713	51987223	chr1
chr1	52437609	52445480	0.0625	-0.213737781416976	0.969223484848485	0.897368421052632	0.134176735655481	0.352376616598233	53	3.73029395543618e-05	HypoLow	chr1	52403085	52442561	Intron2	-	RAB3B	protein_coding	chr1	52437609	52442561	0.629144962520645	0.12544330732597	*	*	*	*	*	0	0	*	*	*	*	*	0	0	chr1-52442145:52442295	chr1	52442145	52442295	chr1	52442145	52442295	chr1-52442044:52442404	chr1	52442044	52442404	chr1
chr1	52437609	52445480	0.0625	-0.213737781416976	0.969223484848485	0.897368421052632	0.134176735655481	0.352376616598233	53	3.73029395543618e-05	HypoLow	chr1	52442562	52442789	Exon2	-	RAB3B	protein_coding	chr1	52442562	52442789	0.0288400457375175	1	*	*	*	*	*	0	0	*	*	*	*	*	0	0	chr1-52442660:52443190	chr1	52442660	52443190	chr1	52442660	52442789	chr1-52442788:52443352	chr1	52442788	52443352	chr1
chr1	52437609	52445480	0.0625	-0.213737781416976	0.969223484848485	0.897368421052632	0.134176735655481	0.352376616598233	53	3.73029395543618e-05	HypoLow	chr1	52442790	52456223	Intron1	-	RAB3B	protein_coding	chr1	52442790	52445480	0.341760894422564	0.200253108017569	*	*	*	*	*	0	0	*	*	*	*	*	0	0	chr1-52444165:52444555	chr1	52444165	52444555	chr1	52444165	52444555	chr1-52444299:52444839	chr1	52444299	52444839	chr1
chr1	52782134	52795838	0.071428571428571	-0.212285781246321	1	0.894736842105263	0.137938950101211	0.373880254062286	136	7.21098805575919e-13	HypoLow	chr1	52769598	52798439	Intron12	+	ZFYVE9	protein_coding	chr1	52782134	52795838	1	0.475156894698519	*	*	*	*	*	0	0	*	*	*	*	*	0	0	chr1-52794220:52794570	chr1	52794220	52794570	chr1	52794220	52794570	chr1-52795825:52796345	chr1	52795825	52796345	chr1
chr1	53308173	53309260	0.226613965744401	0.061678922049764	0.5625	0.217391304347826	0.527655398489174	0.518203253755189	34	0.00320744544174236	HyperHigh	chr1	53307182	53308182	Promoter	+	ZYG11A	protein_coding	chr1	53308173	53308182	0.00827966881324747	0.009	*	*	*	*	*	0	0	*	*	*	*	*	0	0	*	*	*	*	*	0	0	chr1-53308179:53309193	chr1	53308179	53309193	chr1
chr1	53308173	53309260	0.226613965744401	0.061678922049764	0.5625	0.217391304347826	0.527655398489174	0.518203253755189	34	0.00320744544174236	HyperHigh	chr1	53308183	53308645	FirstExon	+	ZYG11A	protein_coding	chr1	53308183	53308645	0.425022999080037	1	CpG: 112	chr1	53308294	53309262	chr1	53308294	53308645	*	*	*	*	*	0	0	chr1-53308205:53308575	chr1	53308205	53308575	chr1	53308205	53308575	chr1-53308641:53309336	chr1	53308641	53309336	chr1
chr1	53308173	53309260	0.226613965744401	0.061678922049764	0.5625	0.217391304347826	0.527655398489174	0.518203253755189	34	0.00320744544174236	HyperHigh	chr1	53308646	53320136	Intron1	+	ZYG11A	protein_coding	chr1	53308646	53309260	0.564857405703772	0.053437771975631	CpG: 112	chr1	53308294	53309262	chr1	53308646	53309260	*	*	*	*	*	0	0	chr1-53308645:53309355	chr1	53308645	53309355	chr1	53308646	53309260	chr1-53309248:53309698	chr1	53309248	53309698	chr1
chr1	53980410	53984957	0.06547619047619	-0.265178868639917	0.96	0.892857142857143	0.130414521209752	0.399372473710134	62	3.45755713574802e-08	HypoLow	chr1	53980298	53980454	Exon7	-	GLIS1	protein_coding	chr1	53980410	53980454	0.00967670991862767	0.282051282051282	*	*	*	*	*	0	0	*	*	*	*	*	0	0	chr1-53980385:53980535	chr1	53980385	53980535	chr1	53980410	53980454	*	*	*	*	*
chr1	53980410	53984957	0.06547619047619	-0.265178868639917	0.96	0.892857142857143	0.130414521209752	0.399372473710134	62	3.45755713574802e-08	HypoLow	chr1	53980455	53986306	Intron6	-	GLIS1	protein_coding	chr1	53980455	53984957	0.990103364855949	0.769441121175867	*	*	*	*	*	0	0	*	*	*	*	*	0	0	chr1-53984905:53985055	chr1	53984905	53985055	chr1	53984905	53984957	chr1-53984593:53984793	chr1	53984593	53984793	chr1
chr1	54033538	54034482	0.300925925925926	-0.523650198151556	1	0.625	0.161820253581971	0.58698801581456	8	0.00976447241476862	HyperLow	chr1	53995626	54059780	Intron3	-	GLIS1	protein_coding	chr1	54033538	54034482	1	0.0147145930105683	*	*	*	*	*	0	0	*	*	*	*	*	0	0	chr1-54034280:54034510	chr1	54034280	54034510	chr1	54034280	54034482	chr1-54034473:54034853	chr1	54034473	54034853	chr1
chr1	54104671	54105490	-0.276887871853547	-0.440535652796116	0.0555555555555556	0.35	0.123744108880292	0.518885569154274	20	7.67703453290528e-05	HypoLow	chr1	54065952	54199576	Intron1	-	GLIS1	protein_coding	chr1	54104671	54105490	1	0.0061291384781177	*	*	*	*	*	0	0	*	*	*	*	*	0	0	chr1-54104785:54105595	chr1	54104785	54105595	chr1	54104785	54105490	chr1-54104979:54105284	chr1	54104979	54105284	chr1
chr1	54144505	54145358	-0.317307692307693	-0.199543429799254	0.174242424242424	0.481060606060606	0.361255186371652	0.557061832196185	11	0.00708815866886156	HypoLow	chr1	54065952	54199576	Intron1	-	GLIS1	protein_coding	chr1	54144505	54145358	1	0.00638358378734359	*	*	*	*	*	0	0	chr1:54144768-54145090	chr1	54144768	54145090	chr1	54144768	54145090	chr1-54144960:54145595	chr1	54144960	54145595	chr1	54144960	54145358	chr1-54145357:54145635	chr1	54145357	54145635	chr1
chr1	54561915	54565181	0.173913043478261	-0.208333333333333	0.96	0.823529411764706	0.257742782841639	0.432931646898466	36	0.00016027926791423	HypoLow	chr1	54554464	54561957	Intron3	+	TCEANC2	protein_coding	chr1	54561915	54561957	0.0128597672994489	0.00560523154944615	*	*	*	*	*	0	0	*	*	*	*	*	0	0	chr1-54561660:54561930	chr1	54561660	54561930	chr1	54561915	54561930	chr1-54561783:54562059	chr1	54561783	54562059	chr1
chr1	54561915	54565181	0.173913043478261	-0.208333333333333	0.96	0.823529411764706	0.257742782841639	0.432931646898466	36	0.00016027926791423	HypoLow	chr1	54561958	54562517	Exon4	+	TCEANC2	protein_coding	chr1	54561958	54562517	0.17115737905695	1	*	*	*	*	*	0	0	*	*	*	*	*	0	0	chr1-54562300:54562450	chr1	54562300	54562450	chr1	54562300	54562450	chr1-54562392:54562607	chr1	54562392	54562607	chr1
chr1	54561915	54565181	0.173913043478261	-0.208333333333333	0.96	0.823529411764706	0.257742782841639	0.432931646898466	36	0.00016027926791423	HypoLow	chr1	54562518	54576724	Intron4	+	TCEANC2	protein_coding	chr1	54562518	54565181	0.815370483772198	0.187456004505139	*	*	*	*	*	0	0	*	*	*	*	*	0	0	chr1-54562540:54562830	chr1	54562540	54562830	chr1	54562540	54562830	chr1-54563914:54564324	chr1	54563914	54564324	chr1
chr1	54685790	54687192	0.232323232323233	-0.115254375652271	0.882352941176471	0.545454545454545	0.353759374819711	0.468546354076522	22	0.0023763095402198	HyperLow	*	*	*	InterGenic	*	*	*	*	*	*	*	*	*	*	*	*	*	0	0	*	*	*	*	*	0	0	chr1-54686825:54687415	chr1	54686825	54687415	chr1	54686825	54687192	chr1-54687150:54687448	chr1	54687150	54687448	chr1
chr1	54793032	54794308	0.076923076923077	-0.268147029300588	0.925925925925926	0.846153846153846	0.233280946628746	0.472765278018163	24	0.00265171799517413	HypoLow	chr1	54747201	54867533	Intron4	-	SSBP3	protein_coding	chr1	54793032	54794308	1	0.0106039956121397	*	*	*	*	*	0	0	*	*	*	*	*	0	0	chr1-54793725:54794055	chr1	54793725	54794055	chr1	54793725	54794055	chr1-54794047:54794173	chr1	54794047	54794173	chr1
chr1	54821909	54822646	0.299509803921569	-0.195496438397153	0.900326797385621	0.58	0.352858284782993	0.521546728559664	25	5.3213982836746e-06	HyperLow	chr1	54747201	54867533	Intron4	-	SSBP3	protein_coding	chr1	54821909	54822646	1	0.00612472160356347	CpG: 24	chr1	54821990	54822333	chr1	54821990	54822333	*	*	*	*	*	0	0	chr1-54822400:54822775	chr1	54822400	54822775	chr1	54822400	54822646	chr1-54822609:54822814	chr1	54822609	54822814	chr1
chr1	54873867	54874997	0.405211038961039	-0.247682791309798	0.8975	0.433006535947712	0.355256190518737	0.602938981828535	7	0.00499812476508246	HyperLow	*	*	*	InterGenic	*	*	*	*	*	*	*	*	*	*	*	*	*	0	0	*	*	*	*	*	0	0	chr1-54874665:54874815	chr1	54874665	54874815	chr1	54874665	54874815	chr1-54874991:54875639	chr1	54874991	54875639	chr1
chr1	55266418	55266830	0.425287356321839	-0.154612438461525	0.827586206896552	0.3	0.430909071585058	0.607675496904295	16	0.00020405726583004	HyperLow	chr1	55266270	55266940	FirstExon	-	TTC22	protein_coding	chr1	55266418	55266830	1	0.614925373134328	CpG: 80	chr1	55266277	55267058	chr1	55266418	55266830	*	*	*	*	*	0	0	chr1-55266385:55267150	chr1	55266385	55267150	chr1	55266418	55266830	chr1-55266824:55267234	chr1	55266824	55267234	chr1
chr1	56438750	56449003	-0.228070175438596	0.182354502471205	0.714285714285714	0.894736842105263	0.538001820951407	0.395568115303342	42	6.73784289465887e-05	HypoHigh	*	*	*	InterGenic	*	*	*	*	*	*	*	*	*	*	*	*	*	0	0	chr1:56438861-56439016	chr1	56438861	56439016	chr1	56438861	56439016	chr1-56446965:56447335	chr1	56446965	56447335	chr1	56446965	56447335	chr1-56448772:56449569	chr1	56448772	56449569	chr1
chr1	56701713	56706846	-0.0992592592592589	0.267048107805824	0.730769230769231	0.9	0.516243001080682	0.240642698295787	28	0.0247312871246732	HypoHigh	*	*	*	InterGenic	*	*	*	*	*	*	*	*	*	*	*	*	*	0	0	*	*	*	*	*	0	0	chr1-56706600:56706750	chr1	56706600	56706750	chr1	56706600	56706750	chr1-56706554:56706844	chr1	56706554	56706844	chr1
chr1	57043424	57043751	0.163865546218488	-0.224666246435498	0.956521739130435	0.764705882352941	0.388695686702131	0.516193535507618	10	0.0170610510755134	HypoLow	chr1	57002785	57044550	Intron1	-	PPAP2B	protein_coding	chr1	57043424	57043751	1	0.00782952232730755	*	*	*	*	*	0	0	chr1:57043287-57044160	chr1	57043287	57044160	chr1	57043424	57043751	chr1-57043520:57043770	chr1	57043520	57043770	chr1	57043520	57043751	chr1-57043748:57044296	chr1	57043748	57044296	chr1
chr1	57128997	57131075	0.053571428571429	-0.291395138768696	0.928571428571429	0.857142857142857	0.233280946628746	0.539063190864238	16	0.0478622645447639	HypoLow	chr1	57111155	57140053	Intron1	+	PRKAA2	protein_coding	chr1	57128997	57131075	1	0.0719080905252959	*	*	*	*	*	0	0	*	*	*	*	*	0	0	*	*	*	*	*	0	0	*	*	*	*	*
chr1	57887798	57890337	0.197860962566845	0.256550321233875	0.291666666666667	0.05	0.58698801581456	0.301862420566087	78	1.51934751467953e-11	HypoHigh	chr1	57756839	58115263	Intron7	-	DAB1	protein_coding	chr1	57887798	57890337	1	0.00708378903198447	CpG: 192	chr1	57887963	57890637	chr1	57887963	57890337	chr1:57887813-57887926	chr1	57887813	57887926	chr1	57887813	57887926	chr1-57890225:57890895	chr1	57890225	57890895	chr1	57890225	57890337	chr1-57890335:57890596	chr1	57890335	57890596	chr1
chr1	58861990	58865266	-0.034610472541507	0.22444561847445	0.924501424501424	0.962250712250712	0.332416927511133	0.146498995640504	37	0.00844109123957352	HypoHigh	chr1	58809076	58971731	Intron3	-	DAB1	protein_coding	chr1	58861990	58865266	1	0.020140788786081	*	*	*	*	*	0	0	*	*	*	*	*	0	0	chr1-58864920:58865150	chr1	58864920	58865150	chr1	58864920	58865150	chr1-58864469:58864653	chr1	58864469	58864653	chr1
chr1	59413483	59423655	0.076923076923077	-0.222854814399865	1	0.888888888888889	0	0.328808909576947	54	7.89158300771687e-07	HypoLow	*	*	*	InterGenic	*	*	*	*	*	*	*	*	*	*	*	*	*	0	0	*	*	*	*	*	0	0	chr1-59423480:59423630	chr1	59423480	59423630	chr1	59423480	59423630	chr1-59423323:59423793	chr1	59423323	59423793	chr1
chr1	59716758	59729459	0.0757142857142855	-0.228491765742445	1	0.894736842105263	0.151415430085132	0.381483769492129	63	5.61810002701021e-06	HypoLow	*	*	*	InterGenic	*	*	*	*	*	*	*	*	*	*	*	*	*	0	0	*	*	*	*	*	0	0	chr1-59728840:59729055	chr1	59728840	59729055	chr1	59728840	59729055	chr1-59727221:59727545	chr1	59727221	59727545	chr1
chr1	60280163	60281008	0.111392611964694	0.354644295717499	0.18070652173913	0.0571895424836601	0.549610495232015	0.15633186452976	29	0.00120317221704997	HypoHigh	chr1	60279532	60280532	Promoter	+	HOOK1	protein_coding	chr1	60280163	60280532	0.436686390532544	0.369	*	*	*	*	*	0	0	*	*	*	*	*	0	0	chr1-60280160:60280595	chr1	60280160	60280595	chr1	60280163	60280532	chr1-60280527:60281031	chr1	60280527	60281031	chr1
chr1	60280163	60281008	0.111392611964694	0.354644295717499	0.18070652173913	0.0571895424836601	0.549610495232015	0.15633186452976	29	0.00120317221704997	HypoHigh	chr1	60280533	60280852	FirstExon	+	HOOK1	protein_coding	chr1	60280533	60280852	0.377514792899408	1	CpG: 49	chr1	60280624	60281048	chr1	60280624	60280852	*	*	*	*	*	0	0	chr1-60280725:60281135	chr1	60280725	60281135	chr1	60280725	60280852	chr1-60280829:60281113	chr1	60280829	60281113	chr1
chr1	60280163	60281008	0.111392611964694	0.354644295717499	0.18070652173913	0.0571895424836601	0.549610495232015	0.15633186452976	29	0.00120317221704997	HypoHigh	chr1	60280853	60287529	Intron1	+	HOOK1	protein_coding	chr1	60280853	60281008	0.183431952662722	0.0232174955062912	CpG: 49	chr1	60280624	60281048	chr1	60280853	60281008	*	*	*	*	*	0	0	chr1-60280725:60281135	chr1	60280725	60281135	chr1	60280853	60281008	chr1-60280908:60281568	chr1	60280908	60281568	chr1
chr1	60392089	60392473	0.127314814814815	0.294901764347105	0.154761904761905	0.0185185185185185	0.432579094038877	0.143373192869756	17	0.00205971393599963	HypoHigh	chr1	60381773	60392208	Intron1	-	CYP2J2	protein_coding	chr1	60392089	60392208	0.309895833333333	0.0114039290848107	*	*	*	*	*	0	0	*	*	*	*	*	0	0	chr1-60392005:60392255	chr1	60392005	60392255	chr1	60392089	60392208	chr1-60392183:60392673	chr1	60392183	60392673	chr1
chr1	60392089	60392473	0.127314814814815	0.294901764347105	0.154761904761905	0.0185185185185185	0.432579094038877	0.143373192869756	17	0.00205971393599963	HypoHigh	chr1	60392209	60392462	FirstExon	-	CYP2J2	protein_coding	chr1	60392209	60392462	0.658854166666667	1	CpG: 24	chr1	60392272	60392583	chr1	60392272	60392462	*	*	*	*	*	0	0	chr1-60392340:60392710	chr1	60392340	60392710	chr1	60392340	60392462	chr1-60392348:60392752	chr1	60392348	60392752	chr1
chr1	60392089	60392473	0.127314814814815	0.294901764347105	0.154761904761905	0.0185185185185185	0.432579094038877	0.143373192869756	17	0.00205971393599963	HypoHigh	chr1	60392463	60393463	Promoter	-	CYP2J2	protein_coding	chr1	60392463	60392473	0.0260416666666667	0.01	CpG: 24	chr1	60392272	60392583	chr1	60392463	60392473	*	*	*	*	*	0	0	chr1-60392340:60392710	chr1	60392340	60392710	chr1	60392463	60392473	chr1-60392348:60392752	chr1	60392348	60392752	chr1
chr1	60649281	60673146	-0.0941176470588235	0.23052765645782	0.651515151515151	0.875	0.583768175763133	0.328409378678084	85	1.94563311184543e-05	HypoHigh	*	*	*	InterGenic	*	*	*	*	*	*	*	*	*	*	*	*	*	0	0	*	*	*	*	*	0	0	chr1-60666480:60666630	chr1	60666480	60666630	chr1	60666480	60666630	chr1-60671100:60671330	chr1	60671100	60671330	chr1
chr1	61192480	61209102	-0.230987292277615	0.3036791032648	0.683537263626252	0.942810457516339	0.590181941785702	0.218128479426678	63	4.27105298401777e-06	HypoHigh	chr1	61128698	61195246	Intron4	-	RP11-436K8.1	lincRNA	chr1	61192480	61195246	0.166405967994225	0.0415639838913266	*	*	*	*	*	0	0	*	*	*	*	*	0	0	chr1-61193645:61193795	chr1	61193645	61193795	chr1	61193645	61193795	chr1-61193193:61193701	chr1	61193193	61193701	chr1
chr1	61192480	61209102	-0.230987292277615	0.3036791032648	0.683537263626252	0.942810457516339	0.590181941785702	0.218128479426678	63	4.27105298401777e-06	HypoHigh	chr1	61195247	61195339	Exon4	-	RP11-436K8.1	lincRNA	chr1	61195247	61195339	0.00553483335338708	1	*	*	*	*	*	0	0	*	*	*	*	*	0	0	*	*	*	*	*	0	0	*	*	*	*	*
chr1	61192480	61209102	-0.230987292277615	0.3036791032648	0.683537263626252	0.942810457516339	0.590181941785702	0.218128479426678	63	4.27105298401777e-06	HypoHigh	chr1	61195340	61198118	Intron3	-	RP11-436K8.1	lincRNA	chr1	61195340	61198118	0.167127902779449	1	*	*	*	*	*	0	0	*	*	*	*	*	0	0	chr1-61197040:61197290	chr1	61197040	61197290	chr1	61197040	61197290	*	*	*	*	*
chr1	61192480	61209102	-0.230987292277615	0.3036791032648	0.683537263626252	0.942810457516339	0.590181941785702	0.218128479426678	63	4.27105298401777e-06	HypoHigh	chr1	61198119	61198180	Exon3	-	RP11-436K8.1	lincRNA	chr1	61198119	61198180	0.00366983515822404	1	*	*	*	*	*	0	0	*	*	*	*	*	0	0	*	*	*	*	*	0	0	*	*	*	*	*
chr1	61192480	61209102	-0.230987292277615	0.3036791032648	0.683537263626252	0.942810457516339	0.590181941785702	0.218128479426678	63	4.27105298401777e-06	HypoHigh	chr1	61198181	61199135	Intron2	-	RP11-436K8.1	lincRNA	chr1	61198181	61199135	0.0573938154253399	1	*	*	*	*	*	0	0	*	*	*	*	*	0	0	chr1-61198960:61199195	chr1	61198960	61199195	chr1	61198960	61199135	chr1-61198982:61199186	chr1	61198982	61199186	chr1
chr1	61192480	61209102	-0.230987292277615	0.3036791032648	0.683537263626252	0.942810457516339	0.590181941785702	0.218128479426678	63	4.27105298401777e-06	HypoHigh	chr1	61199136	61199194	Exon2	-	RP11-436K8.1	lincRNA	chr1	61199136	61199194	0.00348935146191794	1	*	*	*	*	*	0	0	*	*	*	*	*	0	0	chr1-61198960:61199195	chr1	61198960	61199195	chr1	61199136	61199194	chr1-61198982:61199186	chr1	61198982	61199186	chr1
chr1	61192480	61209102	-0.230987292277615	0.3036791032648	0.683537263626252	0.942810457516339	0.590181941785702	0.218128479426678	63	4.27105298401777e-06	HypoHigh	chr1	61199195	61291007	Intron1	-	RP11-436K8.1	lincRNA	chr1	61199195	61209102	0.596017326434845	0.107905284712238	*	*	*	*	*	0	0	*	*	*	*	*	0	0	chr1-61207665:61207815	chr1	61207665	61207815	chr1	61207665	61207815	chr1-61204584:61204960	chr1	61204584	61204960	chr1
chr1	61449145	61453954	-0.065934065934066	0.216674140549451	0.894736842105263	0.947368421052632	0.385593216482346	0.15633186452976	36	0.00335986001936064	HypoHigh	chr1	61331139	61553820	Intron1	+	NFIA	protein_coding	chr1	61449145	61453954	1	0.0215959152330015	*	*	*	*	*	0	0	*	*	*	*	*	0	0	chr1-61453765:61453915	chr1	61453765	61453915	chr1	61453765	61453915	chr1-61453627:61453913	chr1	61453627	61453913	chr1
chr1	61629284	61633197	-0.0694117647058825	0.28713226572969	0.879227053140097	1	0.456624590154976	0.07816593226488	25	0.00135233823461511	HypoHigh	chr1	61554353	61743191	Intron2	+	NFIA	protein_coding	chr1	61629284	61633197	1	0.0207214649593832	*	*	*	*	*	0	0	*	*	*	*	*	0	0	chr1-61632265:61632415	chr1	61632265	61632415	chr1	61632265	61632415	chr1-61632375:61632831	chr1	61632375	61632831	chr1
chr1	61642755	61646491	-0.111111111111111	0.325981597041933	0.866666666666667	1	0.514521481066532	0.216674140549451	20	0.00093429629935946	HypoHigh	chr1	61554353	61743191	Intron2	+	NFIA	protein_coding	chr1	61642755	61646491	1	0.0197841536131499	*	*	*	*	*	0	0	*	*	*	*	*	0	0	*	*	*	*	*	0	0	chr1-61646193:61646649	chr1	61646193	61646649	chr1
chr1	62051215	62053309	-0.032085561497326	0.217395753957238	0.947368421052632	0.947368421052632	0.353759374819711	0.146498995640504	24	0.1001019101083	HypoHigh	*	*	*	InterGenic	*	*	*	*	*	*	*	*	*	*	*	*	*	0	0	*	*	*	*	*	0	0	chr1-62051440:62051710	chr1	62051440	62051710	chr1	62051440	62051710	chr1-62052199:62052455	chr1	62052199	62052455	chr1
chr1	62070601	62078230	0.08	-0.213049365015927	1	0.886752136752137	0.11778644500714	0.311029486723999	51	1.72872806613325e-08	HypoLow	*	*	*	InterGenic	*	*	*	*	*	*	*	*	*	*	*	*	*	0	0	chr1:62072423-62072573	chr1	62072423	62072573	chr1	62072423	62072573	chr1-62074180:62074395	chr1	62074180	62074395	chr1	62074180	62074395	chr1-62077395:62077595	chr1	62077395	62077595	chr1
chr1	63202293	63210812	0.052631578947368	-0.211648368338627	0.944444444444444	0.866666666666667	0.204789815295586	0.417209722462608	54	2.52008367504239e-05	HypoLow	*	*	*	InterGenic	*	*	*	*	*	*	*	*	*	*	*	*	*	0	0	*	*	*	*	*	0	0	chr1-63210665:63210890	chr1	63210665	63210890	chr1	63210665	63210812	chr1-63207112:63207532	chr1	63207112	63207532	chr1
chr1	63790075	63792576	0.258115094499534	0.0713112587423075	0.577546296296297	0.244047619047619	0.614801722974687	0.554832593066821	41	0.000111585847992462	HyperHigh	chr1	63790026	63790112	FirstExon	-	RP4-792G4.2	antisense	chr1	63790075	63790112	0.0147940823670532	0.430232558139535	CpG: 561	chr1	63782394	63790471	chr1	63790075	63790112	*	*	*	*	*	0	0	chr1-63789965:63790475	chr1	63789965	63790475	chr1	63790075	63790112	chr1-63790108:63790628	chr1	63790108	63790628	chr1
chr1	63790075	63792576	0.258115094499534	0.0713112587423075	0.577546296296297	0.244047619047619	0.614801722974687	0.554832593066821	41	0.000111585847992462	HyperHigh	chr1	63790113	63791113	Promoter	-	RP4-792G4.2	antisense	chr1	63790113	63791113	0.39984006397441	1	CpG: 561	chr1	63782394	63790471	chr1	63790113	63790471	*	*	*	*	*	0	0	chr1-63791065:63791430	chr1	63791065	63791430	chr1	63791065	63791113	chr1-63790326:63790489	chr1	63790326	63790489	chr1
chr1	63790075	63792576	0.258115094499534	0.0713112587423075	0.577546296296297	0.244047619047619	0.614801722974687	0.554832593066821	41	0.000111585847992462	HyperHigh	chr1	63788730	63790797	FirstExon	+	FOXD3	protein_coding	chr1	63790075	63790797	0.288684526189524	0.349298500241896	CpG: 561	chr1	63782394	63790471	chr1	63790075	63790471	*	*	*	*	*	0	0	chr1-63789965:63790475	chr1	63789965	63790475	chr1	63790075	63790475	chr1-63790326:63790489	chr1	63790326	63790489	chr1
chr1	63794046	63794646	0.247596153846154	-0.455344645367924	0.954545454545455	0.689903846153846	0.192337533990918	0.651862685393072	15	1.07617598260327e-05	HyperLow	*	*	*	InterGenic	*	*	*	*	*	*	*	*	*	*	*	*	*	0	0	*	*	*	*	*	0	0	chr1-63794545:63794755	chr1	63794545	63794755	chr1	63794545	63794646	chr1-63794625:63795463	chr1	63794625	63795463	chr1
chr1	64992958	64993321	0.469742063492063	0.284545088756328	0.682142857142857	0.142857142857143	0.603232812193923	0.336466145683093	7	0.0200223867508669	HyperHigh	chr1	64936626	65016276	Intron1	+	CACHD1	protein_coding	chr1	64992958	64993321	1	0.00455743879472693	*	*	*	*	*	0	0	*	*	*	*	*	0	0	*	*	*	*	*	0	0	chr1-64993053:64993309	chr1	64993053	64993309	chr1
chr1	65438538	65443237	0.0625	-0.216674140549451	1	0.916666666666667	0.15633186452976	0.382944951426972	28	0.000508046210572711	HypoLow	chr1	65437908	65438795	LastExon	-	RP11-182I10.3	lincRNA	chr1	65438538	65438795	0.0546924877633539	0.289740698985344	*	*	*	*	*	0	0	*	*	*	*	*	0	0	*	*	*	*	*	0	0	chr1-65438760:65439164	chr1	65438760	65439164	chr1
chr1	65438538	65443237	0.0625	-0.216674140549451	1	0.916666666666667	0.15633186452976	0.382944951426972	28	0.000508046210572711	HypoLow	chr1	65438796	65440257	Intron3	-	RP11-182I10.3	lincRNA	chr1	65438796	65440257	0.310917216429027	1	*	*	*	*	*	0	0	*	*	*	*	*	0	0	chr1-65440225:65440415	chr1	65440225	65440415	chr1	65440225	65440257	chr1-65440052:65440552	chr1	65440052	65440552	chr1
chr1	65438538	65443237	0.0625	-0.216674140549451	1	0.916666666666667	0.15633186452976	0.382944951426972	28	0.000508046210572711	HypoLow	chr1	65440258	65440398	Exon3	-	RP11-182I10.3	lincRNA	chr1	65440258	65440398	0.0297935731006597	1	*	*	*	*	*	0	0	*	*	*	*	*	0	0	chr1-65440225:65440415	chr1	65440225	65440415	chr1	65440258	65440398	chr1-65440052:65440552	chr1	65440052	65440552	chr1
chr1	65438538	65443237	0.0625	-0.216674140549451	1	0.916666666666667	0.15633186452976	0.382944951426972	28	0.000508046210572711	HypoLow	chr1	65440399	65455117	Intron2	-	RP11-182I10.3	lincRNA	chr1	65440399	65443237	0.603958288997659	0.192825112107623	*	*	*	*	*	0	0	*	*	*	*	*	0	0	chr1-65441560:65441710	chr1	65441560	65441710	chr1	65441560	65441710	chr1-65441134:65441510	chr1	65441134	65441510	chr1
chr1	65741633	65751735	0.055555555555556	-0.211122633352427	1	0.903225806451613	0.107585652965799	0.353759374819711	82	6.29226116134651e-10	HypoLow	chr1	65730616	65830317	Intron1	+	DNAJC6	protein_coding	chr1	65741633	65751735	1	0.101322955637356	*	*	*	*	*	0	0	*	*	*	*	*	0	0	chr1-65750060:65750210	chr1	65750060	65750210	chr1	65750060	65750210	chr1-65751312:65751762	chr1	65751312	65751762	chr1
chr1	65741633	65751735	0.055555555555556	-0.211122633352427	1	0.903225806451613	0.107585652965799	0.353759374819711	82	6.29226116134651e-10	HypoLow	chr1	65745139	65745561	LastExon	-	RP5-1044H5.1	antisense	chr1	65745139	65745561	0.0417739061571966	1	*	*	*	*	*	0	0	*	*	*	*	*	0	0	chr1-65745285:65745435	chr1	65745285	65745435	chr1	65745285	65745435	chr1-65744861:65745337	chr1	65744861	65745337	chr1
chr1	65741633	65751735	0.055555555555556	-0.211122633352427	1	0.903225806451613	0.107585652965799	0.353759374819711	82	6.29226116134651e-10	HypoLow	chr1	65745562	65772115	Intron1	-	RP5-1044H5.1	antisense	chr1	65745562	65751735	0.611067115422689	0.23247843934772	*	*	*	*	*	0	0	*	*	*	*	*	0	0	chr1-65750060:65750210	chr1	65750060	65750210	chr1	65750060	65750210	chr1-65751312:65751762	chr1	65751312	65751762	chr1
chr1	66017372	66029991	0.0588235294117651	-0.21340214445349	0.96969696969697	0.909090909090909	0.130414521209752	0.328808909576947	98	1.57255527812895e-11	HypoLow	chr1	65891062	66031228	Intron2	+	LEPR	protein_coding	chr1	66017372	66029991	1	0.0900289656550091	*	*	*	*	*	0	0	*	*	*	*	*	0	0	chr1-66029660:66029850	chr1	66029660	66029850	chr1	66029660	66029850	chr1-66024011:66024255	chr1	66024011	66024255	chr1
chr1	66315998	66330872	0.057367149758454	-0.216431466700161	0.964285714285714	0.909090909090909	0.158529130631926	0.402694616765415	65	4.54028589733638e-08	HypoLow	chr1	66258314	66378927	Intron1	+	PDE4B	protein_coding	chr1	66315998	66330872	1	0.123320040128344	*	*	*	*	*	0	0	*	*	*	*	*	0	0	chr1-66323485:66323635	chr1	66323485	66323635	chr1	66323485	66323635	chr1-66329234:66329614	chr1	66329234	66329614	chr1
chr1	66686982	66693576	0.055555555555556	-0.250381073155132	1	0.909090909090909	0	0.328808909576947	40	0.000215080683745812	HypoLow	chr1	66384519	66713142	Intron3	+	PDE4B	protein_coding	chr1	66686982	66693576	1	0.0200655462338303	*	*	*	*	*	0	0	*	*	*	*	*	0	0	chr1-66692740:66692970	chr1	66692740	66692970	chr1	66692740	66692970	chr1-66692783:66693046	chr1	66692783	66693046	chr1
chr1	66731659	66733474	0.241025641025641	-0.258717883968438	0.9375	0.666666666666667	0.29766511911732	0.464049074554845	16	0.000415008253813346	HyperLow	chr1	66723547	66731720	Intron6	+	PDE4B	protein_coding	chr1	66731659	66731720	0.0336088154269972	0.00746359965740854	*	*	*	*	*	0	0	*	*	*	*	*	0	0	chr1-66731420:66731855	chr1	66731420	66731855	chr1	66731659	66731720	chr1-66731481:66731926	chr1	66731481	66731926	chr1
chr1	66731659	66733474	0.241025641025641	-0.258717883968438	0.9375	0.666666666666667	0.29766511911732	0.464049074554845	16	0.000415008253813346	HyperLow	chr1	66731721	66731770	Exon7	+	PDE4B	protein_coding	chr1	66731721	66731770	0.0269972451790634	1	*	*	*	*	*	0	0	*	*	*	*	*	0	0	chr1-66731420:66731855	chr1	66731420	66731855	chr1	66731721	66731770	chr1-66731481:66731926	chr1	66731481	66731926	chr1
chr1	66731659	66733474	0.241025641025641	-0.258717883968438	0.9375	0.666666666666667	0.29766511911732	0.464049074554845	16	0.000415008253813346	HyperLow	chr1	66731771	66798190	Intron7	+	PDE4B	protein_coding	chr1	66731771	66733474	0.938292011019284	0.0256402535419082	*	*	*	*	*	0	0	*	*	*	*	*	0	0	chr1-66732960:66733630	chr1	66732960	66733630	chr1	66732960	66733474	chr1-66733382:66733691	chr1	66733382	66733691	chr1
chr1	66998372	66999812	0.153846153846154	0.315432065406398	0.269230769230769	0.0714285714285714	0.500538157270061	0	32	0.00310514185592402	HypoHigh	chr1	66998964	66999964	Promoter	+	SGIP1	protein_coding	chr1	66998964	66999812	0.588888888888889	0.848	CpG: 35	chr1	66998728	66999060	chr1	66998964	66999060	*	*	*	*	*	0	0	chr1-66999500:66999875	chr1	66999500	66999875	chr1	66999500	66999812	chr1-66999747:67000277	chr1	66999747	67000277	chr1
chr1	67073144	67079291	0.0987154150197631	-0.264191386588131	0.961481481481481	0.857142857142857	0.205845658292084	0.42154043403449	37	3.50883722263166e-06	HypoLow	chr1	67000052	67091529	Intron1	+	SGIP1	protein_coding	chr1	67073144	67079291	1	0.0671972189730752	*	*	*	*	*	0	0	*	*	*	*	*	0	0	chr1-67078940:67079130	chr1	67078940	67079130	chr1	67078940	67079130	chr1-67078942:67079198	chr1	67078942	67079198	chr1
chr1	68148628	68150325	0.170940170940171	0.29717951313586	0.34375	0.19047619047619	0.558912343350711	0.363076692947528	16	0.114785417253109	HypoHigh	chr1	68149743	68150743	Promoter	+	GADD45A	protein_coding	chr1	68149743	68150325	0.342958161461402	0.582	*	*	*	*	*	0	0	*	*	*	*	*	0	0	chr1-68150300:68150510	chr1	68150300	68150510	chr1	68150300	68150325	chr1-68150321:68150841	chr1	68150321	68150841	chr1
chr1	68297421	68298456	0.05	0.210492470890366	0.0740740740740741	0.0454545454545455	0.353759374819711	0.15633186452976	30	0.0273786931072538	HypoHigh	chr1	68243191	68299026	Intron1	-	GNG12	protein_coding	chr1	68297421	68298456	1	0.0185367600967135	CpG: 86	chr1	68298371	68299315	chr1	68298371	68298456	*	*	*	*	*	0	0	chr1-68298365:68299290	chr1	68298365	68299290	chr1	68298365	68298456	chr1-68298450:68298850	chr1	68298450	68298850	chr1
chr1	68297421	68298456	0.05	0.210492470890366	0.0740740740740741	0.0454545454545455	0.353759374819711	0.15633186452976	30	0.0273786931072538	HypoHigh	chr1	68296985	68297985	Promoter	+	GNG12-AS1	antisense	chr1	68297421	68297985	0.544927536231884	0.564	*	*	*	*	*	0	0	*	*	*	*	*	0	0	chr1-68297500:68298175	chr1	68297500	68298175	chr1	68297500	68297985	chr1-68297898:68298543	chr1	68297898	68298543	chr1
chr1	68297421	68298456	0.05	0.210492470890366	0.0740740740740741	0.0454545454545455	0.353759374819711	0.15633186452976	30	0.0273786931072538	HypoHigh	chr1	68297986	68298119	FirstExon	+	GNG12-AS1	antisense	chr1	68297986	68298119	0.128502415458937	1	*	*	*	*	*	0	0	*	*	*	*	*	0	0	chr1-68297500:68298175	chr1	68297500	68298175	chr1	68297986	68298119	chr1-68297898:68298543	chr1	68297898	68298543	chr1
chr1	68297421	68298456	0.05	0.210492470890366	0.0740740740740741	0.0454545454545455	0.353759374819711	0.15633186452976	30	0.0273786931072538	HypoHigh	chr1	68298120	68500329	Intron1	+	GNG12-AS1	antisense	chr1	68298120	68298456	0.32463768115942	0.0016616471076955	CpG: 86	chr1	68298371	68299315	chr1	68298371	68298456	*	*	*	*	*	0	0	chr1-68298365:68299290	chr1	68298365	68299290	chr1	68298365	68298456	chr1-68298450:68298850	chr1	68298450	68298850	chr1
chr1	68833262	68837103	-0.085123614663257	0.257622346822768	0.823906485671192	0.948849104859335	0.538502711098263	0.214280780317384	19	0.00721679058199983	HypoHigh	*	*	*	InterGenic	*	*	*	*	*	*	*	*	*	*	*	*	*	0	0	*	*	*	*	*	0	0	chr1-68836065:68836270	chr1	68836065	68836270	chr1	68836065	68836270	chr1-68836007:68836442	chr1	68836007	68836442	chr1
chr1	71348630	71368570	0.064516129032258	-0.205064800696655	0.952380952380952	0.894736842105263	0.137938950101211	0.361139644080924	84	1.40436585508239e-07	HypoLow	chr1	71318543	71419445	Intron4	-	PTGER3	protein_coding	chr1	71348630	71368570	1	0.197617490238053	*	*	*	*	*	0	0	*	*	*	*	*	0	0	chr1-71365940:71366110	chr1	71365940	71366110	chr1	71365940	71366110	chr1-71361989:71362253	chr1	71361989	71362253	chr1
chr1	71714836	71727306	0.071810542398778	-0.255815742742259	0.959935897435898	0.874509803921569	0.130414521209752	0.384269083954659	43	0.000132259673505088	HypoLow	chr1	71715681	71716681	Promoter	+	RP11-386O9.2	lincRNA	chr1	71715681	71716681	0.0801924619085806	1	*	*	*	*	*	0	0	*	*	*	*	*	0	0	*	*	*	*	*	0	0	*	*	*	*	*
chr1	71714836	71727306	0.071810542398778	-0.255815742742259	0.959935897435898	0.874509803921569	0.130414521209752	0.384269083954659	43	0.000132259673505088	HypoLow	chr1	71716682	71716741	FirstExon	+	RP11-386O9.2	lincRNA	chr1	71716682	71716741	0.00473135525260625	1	*	*	*	*	*	0	0	*	*	*	*	*	0	0	*	*	*	*	*	0	0	*	*	*	*	*
chr1	71714836	71727306	0.071810542398778	-0.255815742742259	0.959935897435898	0.874509803921569	0.130414521209752	0.384269083954659	43	0.000132259673505088	HypoLow	chr1	71716742	71717344	Intron1	+	RP11-386O9.2	lincRNA	chr1	71716742	71717344	0.0482758620689655	1	*	*	*	*	*	0	0	*	*	*	*	*	0	0	*	*	*	*	*	0	0	*	*	*	*	*
chr1	71714836	71727306	0.071810542398778	-0.255815742742259	0.959935897435898	0.874509803921569	0.130414521209752	0.384269083954659	43	0.000132259673505088	HypoLow	chr1	71717345	71717802	LastExon	+	RP11-386O9.2	lincRNA	chr1	71717345	71717802	0.0366479550922213	1	*	*	*	*	*	0	0	*	*	*	*	*	0	0	*	*	*	*	*	0	0	*	*	*	*	*
chr1	73150984	73158393	0	0.216674140549451	0.946778711484593	0.942810457516339	0.228658419422619	0	23	0.97087716326764	HypoHigh	*	*	*	InterGenic	*	*	*	*	*	*	*	*	*	*	*	*	*	0	0	*	*	*	*	*	0	0	chr1-73157680:73157830	chr1	73157680	73157830	chr1	73157680	73157830	chr1-73157588:73157828	chr1	73157588	73157828	chr1
chr1	74702256	74714175	-0.06	0.227770303894993	0.794117647058823	0.916666666666667	0.501746938314716	0.293763633076898	70	0.0075461115748428	HypoHigh	chr1	74701895	74715142	Intron4	+	FPGT-TNNI3K	protein_coding	chr1	74702256	74714175	1	0.899750886993282	*	*	*	*	*	0	0	*	*	*	*	*	0	0	chr1-74711860:74712375	chr1	74711860	74712375	chr1	74711860	74712375	chr1-74710959:74711139	chr1	74710959	74711139	chr1
chr1	74702256	74714175	-0.06	0.227770303894993	0.794117647058823	0.916666666666667	0.501746938314716	0.293763633076898	70	0.0075461115748428	HypoHigh	chr1	74701895	74715142	Intron2	+	TNNI3K	protein_coding	chr1	74702256	74714175	1	0.899750886993282	*	*	*	*	*	0	0	*	*	*	*	*	0	0	chr1-74711860:74712375	chr1	74711860	74712375	chr1	74711860	74712375	chr1-74710959:74711139	chr1	74710959	74711139	chr1
chr1	74823963	74828829	-0.266666666666667	0.223650198151556	0.5	0.875	0.520896013101303	0.346950694324252	18	0.029672689935822	HypoHigh	chr1	74819814	74832939	Intron13	+	FPGT-TNNI3K	protein_coding	chr1	74823963	74828829	1	0.370742857142857	*	*	*	*	*	0	0	*	*	*	*	*	0	0	chr1-74828020:74828170	chr1	74828020	74828170	chr1	74828020	74828170	*	*	*	*	*
chr1	74823963	74828829	-0.266666666666667	0.223650198151556	0.5	0.875	0.520896013101303	0.346950694324252	18	0.029672689935822	HypoHigh	chr1	74819814	74832939	Intron11	+	TNNI3K	protein_coding	chr1	74823963	74828829	1	0.370742857142857	*	*	*	*	*	0	0	*	*	*	*	*	0	0	chr1-74828020:74828170	chr1	74828020	74828170	chr1	74828020	74828170	*	*	*	*	*
chr1	74823963	74828829	-0.266666666666667	0.223650198151556	0.5	0.875	0.520896013101303	0.346950694324252	18	0.029672689935822	HypoHigh	chr1	74807672	74832266	Intron3	-	RP11-439H8.4	antisense	chr1	74823963	74828829	1	0.197853134910954	*	*	*	*	*	0	0	*	*	*	*	*	0	0	chr1-74828020:74828170	chr1	74828020	74828170	chr1	74828020	74828170	*	*	*	*	*
chr1	75210098	75210855	-0.207142857142857	0.216570889099832	0.727272727272727	0.933333333333333	0.457213587395619	0.293763633076898	18	0.00231214467126591	HypoHigh	chr1	75204473	75214434	Intron3	+	TYW3	protein_coding	chr1	75210098	75210855	1	0.0759963859050296	*	*	*	*	*	0	0	*	*	*	*	*	0	0	chr1-75210440:75210615	chr1	75210440	75210615	chr1	75210440	75210615	chr1-75209553:75210396	chr1	75209553	75210396	chr1
chr1	75340174	75342550	-0.168627450980392	0.271159252588978	0.647058823529412	0.933333333333333	0.561938569717677	0.38651825079291	10	0.0458110224742839	HypoHigh	*	*	*	InterGenic	*	*	*	*	*	*	*	*	*	*	*	*	*	0	0	*	*	*	*	*	0	0	chr1-75340280:75340490	chr1	75340280	75340490	chr1	75340280	75340490	*	*	*	*	*
chr1	75380979	75382615	0.124038461538461	-0.278909145875916	0.899038461538461	0.77124183006536	0.225652019353039	0.517471303403761	9	0.00531724733729963	HypoLow	*	*	*	InterGenic	*	*	*	*	*	*	*	*	*	*	*	*	*	0	0	*	*	*	*	*	0	0	*	*	*	*	*	0	0	*	*	*	*	*
chr1	75691075	75695962	-0.0555555555555556	0.21251250375535	0.833333333333333	0.91304347826087	0.417209722462608	0.272229696105007	22	0.0917204348622205	HypoHigh	chr1	75688146	75693410	Intron13	-	SLC44A5	protein_coding	chr1	75691075	75693410	0.477798240229179	0.443579027355623	*	*	*	*	*	0	0	*	*	*	*	*	0	0	*	*	*	*	*	0	0	chr1-75691630:75691870	chr1	75691630	75691870	chr1
chr1	75691075	75695962	-0.0555555555555556	0.21251250375535	0.833333333333333	0.91304347826087	0.417209722462608	0.272229696105007	22	0.0917204348622205	HypoHigh	chr1	75693411	75693542	Exon13	-	SLC44A5	protein_coding	chr1	75693411	75693542	0.0268058113361981	1	*	*	*	*	*	0	0	*	*	*	*	*	0	0	*	*	*	*	*	0	0	*	*	*	*	*
chr1	75691075	75695962	-0.0555555555555556	0.21251250375535	0.833333333333333	0.91304347826087	0.417209722462608	0.272229696105007	22	0.0917204348622205	HypoHigh	chr1	75693543	75699670	Intron12	-	SLC44A5	protein_coding	chr1	75693543	75695962	0.494986699406589	0.394809858005549	*	*	*	*	*	0	0	chr1:75694572-75694736	chr1	75694572	75694736	chr1	75694572	75694736	*	*	*	*	*	0	0	chr1-75694920:75695300	chr1	75694920	75695300	chr1
chr1	75776886	75777310	0.181818181818182	-0.209453079271047	0.96	0.818181818181818	0.350993858376756	0.5	8	0.0146393121014319	HypoLow	chr1	75766371	75805266	Intron4	-	SLC44A5	protein_coding	chr1	75776886	75777310	1	0.0109011441059262	*	*	*	*	*	0	0	*	*	*	*	*	0	0	*	*	*	*	*	0	0	*	*	*	*	*
chr1	76501515	76506923	0.0919913419913415	-0.26288302463671	0.964640198511167	0.863636363636364	0.137938950101211	0.451664638532091	45	1.80433401421133e-06	HypoLow	chr1	76506375	76507375	Promoter	+	RP11-550H2.2	lincRNA	chr1	76506375	76506923	0.101331360946746	0.548	*	*	*	*	*	0	0	*	*	*	*	*	0	0	chr1-76506000:76506415	chr1	76506000	76506415	chr1	76506375	76506415	chr1-76506638:76507014	chr1	76506638	76507014	chr1
chr1	78037340	78048977	0.0643436260134555	-0.24484330714649	1	0.925824175824176	0	0.288162864337309	81	8.14016065397839e-13	HypoLow	chr1	78034152	78041752	Intron11	-	ZZZ3	protein_coding	chr1	78037340	78041752	0.379135516026467	0.580526315789474	*	*	*	*	*	0	0	*	*	*	*	*	0	0	chr1-78037765:78037915	chr1	78037765	78037915	chr1	78037765	78037915	chr1-78041350:78041606	chr1	78041350	78041606	chr1
chr1	78037340	78048977	0.0643436260134555	-0.24484330714649	1	0.925824175824176	0	0.288162864337309	81	8.14016065397839e-13	HypoLow	chr1	78041753	78041905	Exon11	-	ZZZ3	protein_coding	chr1	78041753	78041905	0.0130617856835954	1	*	*	*	*	*	0	0	*	*	*	*	*	0	0	*	*	*	*	*	0	0	*	*	*	*	*
chr1	78037340	78048977	0.0643436260134555	-0.24484330714649	1	0.925824175824176	0	0.288162864337309	81	8.14016065397839e-13	HypoLow	chr1	78041906	78044458	Intron10	-	ZZZ3	protein_coding	chr1	78041906	78044458	0.219300507003523	1	*	*	*	*	*	0	0	*	*	*	*	*	0	0	*	*	*	*	*	0	0	*	*	*	*	*
chr1	78037340	78048977	0.0643436260134555	-0.24484330714649	1	0.925824175824176	0	0.288162864337309	81	8.14016065397839e-13	HypoLow	chr1	78044459	78044554	Exon10	-	ZZZ3	protein_coding	chr1	78044459	78044554	0.00816361605224714	1	*	*	*	*	*	0	0	*	*	*	*	*	0	0	*	*	*	*	*	0	0	*	*	*	*	*
chr1	78037340	78048977	0.0643436260134555	-0.24484330714649	1	0.925824175824176	0	0.288162864337309	81	8.14016065397839e-13	HypoLow	chr1	78044555	78045211	Intron9	-	ZZZ3	protein_coding	chr1	78044555	78045211	0.0563719171607803	1	*	*	*	*	*	0	0	*	*	*	*	*	0	0	chr1-78045120:78045270	chr1	78045120	78045270	chr1	78045120	78045211	chr1-78045077:78045987	chr1	78045077	78045987	chr1
chr1	78037340	78048977	0.0643436260134555	-0.24484330714649	1	0.925824175824176	0	0.288162864337309	81	8.14016065397839e-13	HypoLow	chr1	78045212	78045313	Exon9	-	ZZZ3	protein_coding	chr1	78045212	78045313	0.00867921285554696	1	*	*	*	*	*	0	0	*	*	*	*	*	0	0	chr1-78045305:78045490	chr1	78045305	78045490	chr1	78045305	78045313	chr1-78045251:78045527	chr1	78045251	78045527	chr1
chr1	78037340	78048977	0.0643436260134555	-0.24484330714649	1	0.925824175824176	0	0.288162864337309	81	8.14016065397839e-13	HypoLow	chr1	78045314	78046682	Intron8	-	ZZZ3	protein_coding	chr1	78045314	78046682	0.117556071152359	1	*	*	*	*	*	0	0	*	*	*	*	*	0	0	chr1-78045305:78045490	chr1	78045305	78045490	chr1	78045314	78045490	chr1-78045251:78045527	chr1	78045251	78045527	chr1
chr1	78037340	78048977	0.0643436260134555	-0.24484330714649	1	0.925824175824176	0	0.288162864337309	81	8.14016065397839e-13	HypoLow	chr1	78046683	78046754	Exon8	-	ZZZ3	protein_coding	chr1	78046683	78046754	0.00610122883904786	1	*	*	*	*	*	0	0	*	*	*	*	*	0	0	*	*	*	*	*	0	0	*	*	*	*	*
chr1	78037340	78048977	0.0643436260134555	-0.24484330714649	1	0.925824175824176	0	0.288162864337309	81	8.14016065397839e-13	HypoLow	chr1	78046755	78047460	Intron7	-	ZZZ3	protein_coding	chr1	78046755	78047460	0.0605826243877288	1	*	*	*	*	*	0	0	*	*	*	*	*	0	0	*	*	*	*	*	0	0	*	*	*	*	*
chr1	78037340	78048977	0.0643436260134555	-0.24484330714649	1	0.925824175824176	0	0.288162864337309	81	8.14016065397839e-13	HypoLow	chr1	78047461	78047576	Exon7	-	ZZZ3	protein_coding	chr1	78047461	78047576	0.00988227206324654	1	*	*	*	*	*	0	0	*	*	*	*	*	0	0	*	*	*	*	*	0	0	*	*	*	*	*
chr1	78037340	78048977	0.0643436260134555	-0.24484330714649	1	0.925824175824176	0	0.288162864337309	81	8.14016065397839e-13	HypoLow	chr1	78047577	78047663	Intron6	-	ZZZ3	protein_coding	chr1	78047577	78047663	0.00739022084729741	1	*	*	*	*	*	0	0	*	*	*	*	*	0	0	*	*	*	*	*	0	0	*	*	*	*	*
chr1	78037340	78048977	0.0643436260134555	-0.24484330714649	1	0.925824175824176	0	0.288162864337309	81	8.14016065397839e-13	HypoLow	chr1	78047664	78047811	Exon6	-	ZZZ3	protein_coding	chr1	78047664	78047811	0.0126321216808456	1	*	*	*	*	*	0	0	*	*	*	*	*	0	0	*	*	*	*	*	0	0	*	*	*	*	*
chr1	78037340	78048977	0.0643436260134555	-0.24484330714649	1	0.925824175824176	0	0.288162864337309	81	8.14016065397839e-13	HypoLow	chr1	78047812	78050201	Intron5	-	ZZZ3	protein_coding	chr1	78047812	78048977	0.100111712640715	0.487651737128506	*	*	*	*	*	0	0	*	*	*	*	*	0	0	chr1-78048660:78048935	chr1	78048660	78048935	chr1	78048660	78048935	chr1-78048632:78048948	chr1	78048632	78048948	chr1
chr1	78153274	78153817	0.4	-0.280306570386431	0.961538461538462	0.52	0.182984811475013	0.52599240003908	22	7.57622401678211e-08	HyperLow	*	*	*	InterGenic	*	*	*	*	*	*	*	*	*	*	*	*	*	0	0	*	*	*	*	*	0	0	chr1-78153285:78153570	chr1	78153285	78153570	chr1	78153285	78153570	chr1-78153409:78153865	chr1	78153409	78153865	chr1
chr1	78442208	78443582	-0.21900974025974	-0.0212105147661375	0.339080459770115	0.642857142857143	0.611510224386963	0.602877299604978	29	0.000612494696814968	HypoHigh	chr1	78435700	78444568	Intron1	-	FUBP1	protein_coding	chr1	78442208	78443582	1	0.154939106901218	*	*	*	*	*	0	0	*	*	*	*	*	0	0	chr1-78442880:78443390	chr1	78442880	78443390	chr1	78442880	78443390	chr1-78443571:78443760	chr1	78443571	78443760	chr1
chr1	78507415	78511050	0.052631578947368	-0.200230077420962	1	0.911067193675889	0.170969618218764	0.365422914575069	51	2.26305435748347e-06	HypoLow	chr1	78445304	78546358	Intron1	+	GIPC2	protein_coding	chr1	78507415	78511050	1	0.0359708670611752	*	*	*	*	*	0	0	*	*	*	*	*	0	0	chr1-78510325:78512695	chr1	78510325	78512695	chr1	78510325	78511050	chr1-78511042:78512084	chr1	78511042	78512084	chr1
chr1	78956544	78956809	0	0.263224551222827	0.0488095238095238	0.0444664031620553	0.330534369891082	0.1134626259652	11	0.938912160584827	HypoHigh	chr1	78864711	78958356	Intron2	+	PTGFR	protein_coding	chr1	78956544	78956809	1	0.00282983608307972	CpG: 70	chr1	78956624	78957516	chr1	78956624	78956809	*	*	*	*	*	0	0	chr1-78956345:78957775	chr1	78956345	78957775	chr1	78956544	78956809	chr1-78956725:78957061	chr1	78956725	78957061	chr1
chr1	78956838	78957907	0.222222222222222	0.066712880737102	0.571428571428571	0.260869565217391	0.576524652837874	0.510213020743189	30	0.00297201598770256	HyperHigh	chr1	78864711	78958356	Intron2	+	PTGFR	protein_coding	chr1	78956838	78957907	1	0.0114154519728763	CpG: 70	chr1	78956624	78957516	chr1	78956838	78957516	chr1:78957462-78957762	chr1	78957462	78957762	chr1	78957462	78957762	chr1-78956345:78957775	chr1	78956345	78957775	chr1	78956838	78957775	chr1-78957528:78957820	chr1	78957528	78957820	chr1
chr1	79201822	79207168	-0.093956043956044	0.208513849587217	0.680672268907563	0.873015873015873	0.460090879681624	0.323650198151556	29	0.0960388322408742	HypoHigh	*	*	*	InterGenic	*	*	*	*	*	*	*	*	*	*	*	*	*	0	0	*	*	*	*	*	0	0	chr1-79203300:79203490	chr1	79203300	79203490	chr1	79203300	79203490	*	*	*	*	*
chr1	79359035	79382107	-0.0377492877492875	0.2164534242753	0.916666666666667	0.9375	0.385593216482346	0.174470462995874	89	0.0624234666589559	HypoHigh	chr1	79358875	79383318	Intron12	-	ELTD1	protein_coding	chr1	79359035	79382107	1	0.943910321973571	*	*	*	*	*	0	0	*	*	*	*	*	0	0	chr1-79379620:79379890	chr1	79379620	79379890	chr1	79379620	79379890	chr1-79380731:79381115	chr1	79380731	79381115	chr1
chr1	79412072	79426537	-0.0366300366300361	0.200083750209769	0.85	0.909090909090909	0.486382639009082	0.288618872485741	66	0.0327042274427506	HypoHigh	chr1	79411959	79412111	Exon3	-	ELTD1	protein_coding	chr1	79412072	79412111	0.00269616315243692	0.256578947368421	*	*	*	*	*	0	0	*	*	*	*	*	0	0	*	*	*	*	*	0	0	*	*	*	*	*
chr1	79412072	79426537	-0.0366300366300361	0.200083750209769	0.85	0.909090909090909	0.486382639009082	0.288618872485741	66	0.0327042274427506	HypoHigh	chr1	79412112	79470754	Intron2	-	ELTD1	protein_coding	chr1	79412112	79426537	0.997234704459039	0.24598410695406	*	*	*	*	*	0	0	*	*	*	*	*	0	0	chr1-79425180:79425330	chr1	79425180	79425330	chr1	79425180	79425330	chr1-79425950:79426330	chr1	79425950	79426330	chr1
chr1	81720904	81731488	0.0920853269537475	-0.288131628685238	1	0.872282608695652	0.146498995640504	0.448212506842305	69	7.4001324810233e-12	HypoLow	*	*	*	InterGenic	*	*	*	*	*	*	*	*	*	*	*	*	*	0	0	*	*	*	*	*	0	0	chr1-81727965:81728115	chr1	81727965	81728115	chr1	81727965	81728115	chr1-81730689:81730999	chr1	81730689	81730999	chr1
chr1	81797183	81802965	-0.07347670250896	0.211657225347582	0.857142857142857	0.923076923076923	0.5	0.272229696105007	36	0.0246193192595064	HypoHigh	chr1	81772195	81910720	Intron1	+	LPHN2	protein_coding	chr1	81797183	81802965	1	0.041739758166396	*	*	*	*	*	0	0	*	*	*	*	*	0	0	chr1-81801660:81801890	chr1	81801660	81801890	chr1	81801660	81801890	chr1-81801590:81801900	chr1	81801590	81801900	chr1
chr1	81908902	81911874	-0.118181818181818	0.265919728313423	0.745967741935484	0.931034482758621	0.529479947901643	0.260949909557244	19	0.0225359645861631	HypoHigh	chr1	81772195	81910720	Intron1	+	LPHN2	protein_coding	chr1	81908902	81910720	0.611709286675639	0.0131239848402815	*	*	*	*	*	0	0	*	*	*	*	*	0	0	chr1-81909040:81909295	chr1	81909040	81909295	chr1	81909040	81909295	chr1-81910167:81910451	chr1	81910167	81910451	chr1
chr1	81908902	81911874	-0.118181818181818	0.265919728313423	0.745967741935484	0.931034482758621	0.529479947901643	0.260949909557244	19	0.0225359645861631	HypoHigh	chr1	81910721	81910774	Exon2	+	LPHN2	protein_coding	chr1	81910721	81910774	0.0178331090174966	1	*	*	*	*	*	0	0	*	*	*	*	*	0	0	*	*	*	*	*	0	0	*	*	*	*	*
chr1	81908902	81911874	-0.118181818181818	0.265919728313423	0.745967741935484	0.931034482758621	0.529479947901643	0.260949909557244	19	0.0225359645861631	HypoHigh	chr1	81910775	82046560	Intron2	+	LPHN2	protein_coding	chr1	81910775	81911874	0.36978465679677	0.00809367750487904	*	*	*	*	*	0	0	*	*	*	*	*	0	0	chr1-81911800:81911950	chr1	81911800	81911950	chr1	81911800	81911874	chr1-81911114:81911384	chr1	81911114	81911384	chr1
chr1	82354813	82356215	-0.240740740740741	-0.012263231714413	0.476190476190476	0.740740740740741	0.556393445622244	0.556393445622244	10	0.00803887462674596	HypoHigh	chr1	82302743	82372701	Intron5	+	LPHN2	protein_coding	chr1	82354813	82356215	1	0.0200405957860431	*	*	*	*	*	0	0	*	*	*	*	*	0	0	*	*	*	*	*	0	0	*	*	*	*	*
chr1	82752506	82757632	-0.0440563725490195	0.283322713031238	0.92551724137931	1	0.385372093584872	0	27	0.00299612611464879	HypoHigh	*	*	*	InterGenic	*	*	*	*	*	*	*	*	*	*	*	*	*	0	0	*	*	*	*	*	0	0	chr1-82757065:82757215	chr1	82757065	82757215	chr1	82757065	82757215	chr1-82757482:82757862	chr1	82757482	82757862	chr1
chr1	83516517	83528106	-0.117647058823529	0.222551950394947	0.642857142857143	0.818181818181818	0.58698801581456	0.306098611351497	52	0.0159353148031732	HypoHigh	chr1	83463273	83541823	Intron5	+	RP4-601K24.1	lincRNA	chr1	83516517	83528106	1	0.147536600891152	*	*	*	*	*	0	0	*	*	*	*	*	0	0	chr1-83527525:83527675	chr1	83527525	83527675	chr1	83527525	83527675	chr1-83526006:83526184	chr1	83526006	83526184	chr1
chr1	85011956	85022387	0.0625	-0.261694232270398	1	0.933333333333333	0	0.306098611351497	40	6.69119043594409e-08	HypoLow	chr1	85015289	85020882	LastExon	-	CTBS	protein_coding	chr1	85015289	85020882	0.53619020228166	1	*	*	*	*	*	0	0	*	*	*	*	*	0	0	chr1-85017460:85017610	chr1	85017460	85017610	chr1	85017460	85017610	chr1-85017622:85018002	chr1	85017622	85018002	chr1
chr1	85011956	85022387	0.0625	-0.261694232270398	1	0.933333333333333	0	0.306098611351497	40	6.69119043594409e-08	HypoLow	chr1	85020883	85028939	Intron6	-	CTBS	protein_coding	chr1	85020883	85022387	0.144185600613556	0.18669314796425	*	*	*	*	*	0	0	*	*	*	*	*	0	0	*	*	*	*	*	0	0	*	*	*	*	*
chr1	85263115	85295300	0.0909090909090911	-0.218766089359807	1	0.875	0.146498995640504	0.365845946613985	218	1.14630389618686e-31	HypoLow	chr1	85277285	85279854	LastExon	-	LPAR3	protein_coding	chr1	85277285	85279854	0.0798197918284915	1	*	*	*	*	*	0	0	*	*	*	*	*	0	0	*	*	*	*	*	0	0	chr1-85276597:85277297	chr1	85276597	85277297	chr1
chr1	85263115	85295300	0.0909090909090911	-0.218766089359807	1	0.875	0.146498995640504	0.365845946613985	218	1.14630389618686e-31	HypoLow	chr1	85279855	85331067	Intron1	-	LPAR3	protein_coding	chr1	85279855	85295300	0.479881932577288	0.301589471217683	*	*	*	*	*	0	0	*	*	*	*	*	0	0	chr1-85295165:85295315	chr1	85295165	85295315	chr1	85295165	85295300	chr1-85293729:85293962	chr1	85293729	85293962	chr1
chr1	85318247	85357345	0.08695652173913	-0.200493640298453	0.964285714285714	0.866666666666667	0.178995086838367	0.396240625180289	269	2.48990406940639e-29	HypoLow	chr1	85279855	85331067	Intron1	-	LPAR3	protein_coding	chr1	85318247	85331067	0.327894009923781	0.250331953448411	*	*	*	*	*	0	0	chr1:85328527-85328795	chr1	85328527	85328795	chr1	85328527	85328795	chr1-85328925:85329195	chr1	85328925	85329195	chr1	85328925	85329195	chr1-85330686:85331136	chr1	85330686	85331136	chr1
chr1	85318247	85357345	0.08695652173913	-0.200493640298453	0.964285714285714	0.866666666666667	0.178995086838367	0.396240625180289	269	2.48990406940639e-29	HypoLow	chr1	85331068	85331842	FirstExon	-	LPAR3	protein_coding	chr1	85331068	85331842	0.0197964090234795	1	*	*	*	*	*	0	0	*	*	*	*	*	0	0	*	*	*	*	*	0	0	chr1-85331207:85331657	chr1	85331207	85331657	chr1
chr1	85318247	85357345	0.08695652173913	-0.200493640298453	0.964285714285714	0.866666666666667	0.178995086838367	0.396240625180289	269	2.48990406940639e-29	HypoLow	chr1	85331843	85332843	Promoter	-	LPAR3	protein_coding	chr1	85331843	85332843	0.0255767558442887	1	*	*	*	*	*	0	0	*	*	*	*	*	0	0	*	*	*	*	*	0	0	chr1-85332103:85332343	chr1	85332103	85332343	chr1
chr1	85463459	85464068	0.0666666666666667	0.221938999065856	0.1	0.0476190476190476	0.476637056991957	0.181188147733199	20	0.0396138148852914	HypoHigh	chr1	85462624	85463624	Promoter	-	MCOLN2	protein_coding	chr1	85463459	85463624	0.270935960591133	0.165	*	*	*	*	*	0	0	*	*	*	*	*	0	0	chr1-85463445:85464335	chr1	85463445	85464335	chr1	85463459	85463624	chr1-85463549:85463913	chr1	85463549	85463913	chr1
chr1	85463459	85464068	0.0666666666666667	0.221938999065856	0.1	0.0476190476190476	0.476637056991957	0.181188147733199	20	0.0396138148852914	HypoHigh	chr1	85463829	85464829	Promoter	+	WDR63	protein_coding	chr1	85463829	85464068	0.392446633825944	0.239	CpG: 32	chr1	85463884	85464167	chr1	85463884	85464068	*	*	*	*	*	0	0	chr1-85463445:85464335	chr1	85463445	85464335	chr1	85463829	85464068	chr1-85463925:85464375	chr1	85463925	85464375	chr1
chr1	86281495	86296211	0.0679618768328445	-0.208290114910357	0.956521739130435	0.882352941176471	0.146498995640504	0.350355034571981	83	6.40116785287599e-11	HypoLow	chr1	86252145	86282470	Intron47	-	COL24A1	protein_coding	chr1	86281495	86282470	0.0662544169611307	0.0321516900247321	*	*	*	*	*	0	0	*	*	*	*	*	0	0	*	*	*	*	*	0	0	chr1-86281632:86281729	chr1	86281632	86281729	chr1
chr1	86281495	86296211	0.0679618768328445	-0.208290114910357	0.956521739130435	0.882352941176471	0.146498995640504	0.350355034571981	83	6.40116785287599e-11	HypoLow	chr1	86282471	86282578	Exon47	-	COL24A1	protein_coding	chr1	86282471	86282578	0.00727099755368307	1	*	*	*	*	*	0	0	*	*	*	*	*	0	0	*	*	*	*	*	0	0	*	*	*	*	*
chr1	86281495	86296211	0.0679618768328445	-0.208290114910357	0.956521739130435	0.882352941176471	0.146498995640504	0.350355034571981	83	6.40116785287599e-11	HypoLow	chr1	86282579	86283716	Intron46	-	COL24A1	protein_coding	chr1	86282579	86283716	0.0772628431639032	1	*	*	*	*	*	0	0	*	*	*	*	*	0	0	*	*	*	*	*	0	0	*	*	*	*	*
chr1	86281495	86296211	0.0679618768328445	-0.208290114910357	0.956521739130435	0.882352941176471	0.146498995640504	0.350355034571981	83	6.40116785287599e-11	HypoLow	chr1	86283717	86283770	Exon46	-	COL24A1	protein_coding	chr1	86283717	86283770	0.0036015221527589	1	*	*	*	*	*	0	0	*	*	*	*	*	0	0	*	*	*	*	*	0	0	*	*	*	*	*
chr1	86281495	86296211	0.0679618768328445	-0.208290114910357	0.956521739130435	0.882352941176471	0.146498995640504	0.350355034571981	83	6.40116785287599e-11	HypoLow	chr1	86283771	86289218	Intron45	-	COL24A1	protein_coding	chr1	86283771	86289218	0.370141342756184	1	*	*	*	*	*	0	0	*	*	*	*	*	0	0	chr1-86288340:86288730	chr1	86288340	86288730	chr1	86288340	86288730	chr1-86288481:86289022	chr1	86288481	86289022	chr1
chr1	86281495	86296211	0.0679618768328445	-0.208290114910357	0.956521739130435	0.882352941176471	0.146498995640504	0.350355034571981	83	6.40116785287599e-11	HypoLow	chr1	86289219	86289272	Exon45	-	COL24A1	protein_coding	chr1	86289219	86289272	0.0036015221527589	1	*	*	*	*	*	0	0	*	*	*	*	*	0	0	*	*	*	*	*	0	0	*	*	*	*	*
chr1	86281495	86296211	0.0679618768328445	-0.208290114910357	0.956521739130435	0.882352941176471	0.146498995640504	0.350355034571981	83	6.40116785287599e-11	HypoLow	chr1	86289273	86289367	Intron44	-	COL24A1	protein_coding	chr1	86289273	86289367	0.00638760532753466	1	*	*	*	*	*	0	0	*	*	*	*	*	0	0	*	*	*	*	*	0	0	*	*	*	*	*
chr1	86281495	86296211	0.0679618768328445	-0.208290114910357	0.956521739130435	0.882352941176471	0.146498995640504	0.350355034571981	83	6.40116785287599e-11	HypoLow	chr1	86289368	86289421	Exon44	-	COL24A1	protein_coding	chr1	86289368	86289421	0.0036015221527589	1	*	*	*	*	*	0	0	*	*	*	*	*	0	0	*	*	*	*	*	0	0	*	*	*	*	*
chr1	86281495	86296211	0.0679618768328445	-0.208290114910357	0.956521739130435	0.882352941176471	0.146498995640504	0.350355034571981	83	6.40116785287599e-11	HypoLow	chr1	86289422	86304267	Intron43	-	COL24A1	protein_coding	chr1	86289422	86296211	0.461334601793966	0.457325698888515	*	*	*	*	*	0	0	*	*	*	*	*	0	0	chr1-86290200:86290435	chr1	86290200	86290435	chr1	86290200	86290435	chr1-86296200:86296610	chr1	86296200	86296610	chr1
chr1	86620787	86621278	0.447552705292643	0.218582910528033	0.743421052631579	0.188235294117647	0.534422944533381	0.320357163700575	17	3.34187956484866e-05	HyperHigh	chr1	86611867	86622023	Intron1	-	COL24A1	protein_coding	chr1	86620787	86621278	1	0.0483458054352107	*	*	*	*	*	0	0	*	*	*	*	*	0	0	chr1-86621125:86621470	chr1	86621125	86621470	chr1	86621125	86621278	chr1-86621242:86621982	chr1	86621242	86621982	chr1
chr1	86622681	86627547	0.107936507936508	-0.237667363236759	0.948684210526316	0.849264705882353	0.222343476214566	0.505437774590014	29	0.000190537453627478	HypoLow	chr1	86622447	86623447	Promoter	-	COL24A1	protein_coding	chr1	86622681	86623447	0.157418824496506	0.766	CpG: 106	chr1	86621278	86622871	chr1	86622681	86622871	*	*	*	*	*	0	0	chr1-86623145:86623415	chr1	86623145	86623415	chr1	86623145	86623415	chr1-86622864:86623204	chr1	86622864	86623204	chr1
chr1	87119588	87132357	0.0625	-0.231182394915265	0.96	0.894736842105263	0.181188147733199	0.425871145606372	72	5.7747656976987e-07	HypoLow	chr1	87116065	87158845	Intron1	-	RP4-651E10.4	antisense	chr1	87119588	87132357	1	0.298480598410472	*	*	*	*	*	0	0	*	*	*	*	*	0	0	chr1-87121505:87121655	chr1	87121505	87121655	chr1	87121505	87121655	chr1-87125534:87125934	chr1	87125534	87125934	chr1
chr1	87119588	87132357	0.0625	-0.231182394915265	0.96	0.894736842105263	0.181188147733199	0.425871145606372	72	5.7747656976987e-07	HypoLow	chr1	87116081	87120089	Intron14	+	CLCA3P	pseudogene	chr1	87119588	87120089	0.0392356488370272	0.125	*	*	*	*	*	0	0	*	*	*	*	*	0	0	*	*	*	*	*	0	0	*	*	*	*	*
chr1	87119588	87132357	0.0625	-0.231182394915265	0.96	0.894736842105263	0.181188147733199	0.425871145606372	72	5.7747656976987e-07	HypoLow	chr1	87120090	87121059	LastExon	+	CLCA3P	pseudogene	chr1	87120090	87121059	0.0758869136189208	1	*	*	*	*	*	0	0	*	*	*	*	*	0	0	*	*	*	*	*	0	0	*	*	*	*	*
chr1	87581444	87587596	0.0632440476190475	-0.201661452286848	0.967133620689655	0.891812865497076	0.146498995640504	0.303894415547446	47	2.62753181006016e-06	HypoLow	chr1	87569273	87599296	Intron6	+	RP5-1052I5.2	protein_coding	chr1	87581444	87587596	1	0.20490956933018	*	*	*	*	*	0	0	*	*	*	*	*	0	0	chr1-87587460:87587755	chr1	87587460	87587755	chr1	87587460	87587596	chr1-87586532:87586795	chr1	87586532	87586795	chr1
chr1	88192954	88199733	0.0625	-0.224611028987594	0.966629588431591	0.891812865497076	0.144287607319943	0.382944951426972	41	0.000267827835037785	HypoLow	*	*	*	InterGenic	*	*	*	*	*	*	*	*	*	*	*	*	*	0	0	*	*	*	*	*	0	0	chr1-88199220:88199390	chr1	88199220	88199390	chr1	88199220	88199390	chr1-88196063:88196319	chr1	88196063	88196319	chr1
chr1	88928115	88928646	0.128654970760233	0.267575779465029	0.260869565217391	0.0555555555555556	0.579586226971669	0.270426041486378	14	0.0126308962771882	HypoHigh	*	*	*	InterGenic	*	*	*	*	*	*	*	*	CpG: 50	chr1	88928283	88928760	chr1	88928283	88928646	*	*	*	*	*	0	0	chr1-88928200:88929075	chr1	88928200	88929075	chr1	88928200	88928646	chr1-88928483:88928680	chr1	88928483	88928680	chr1
chr1	89054570	89060882	0.111111111111111	-0.24484330714649	0.958333333333333	0.866666666666667	0.293763633076898	0.461477168113533	32	0.000151767136935543	HypoLow	chr1	89035879	89150846	Intron1	-	RP11-76N22.2	antisense	chr1	89054570	89060882	1	0.0549027112127828	*	*	*	*	*	0	0	*	*	*	*	*	0	0	*	*	*	*	*	0	0	chr1-89060676:89061804	chr1	89060676	89061804	chr1
chr1	89092329	89102670	0.0784615384615385	-0.244020468980396	0.958260869565217	0.872282608695652	0.15633186452976	0.431866607462722	53	7.94652081749916e-08	HypoLow	chr1	89035879	89150846	Intron1	-	RP11-76N22.2	antisense	chr1	89092329	89102670	1	0.0899475501665695	*	*	*	*	*	0	0	*	*	*	*	*	0	0	chr1-89096885:89097035	chr1	89096885	89097035	chr1	89096885	89097035	chr1-89101833:89102163	chr1	89101833	89102163	chr1
chr1	91181731	91181947	-0.0696581196581198	0.259514914040132	0.284313725490196	0.45	0.68358883873975	0.569715972342415	7	0.335822098321342	HypoHigh	chr1	91180314	91182127	Intron1	-	BARHL2	protein_coding	chr1	91181731	91181947	1	0.119139547710976	*	*	*	*	*	0	0	*	*	*	*	*	0	0	chr1-91181625:91182315	chr1	91181625	91182315	chr1	91181731	91181947	chr1-91181926:91182306	chr1	91181926	91182306	chr1
chr1	91190109	91192198	0.215102974828375	0.158195092606595	0.515151515151515	0.230769230769231	0.625	0.497038283351729	64	6.32126184691218e-06	HyperHigh	*	*	*	InterGenic	*	*	*	*	*	*	*	*	CpG: 147	chr1	91190489	91192804	chr1	91190489	91192198	chr1:91190991-91191184	chr1	91190991	91191184	chr1	91190991	91191184	chr1-91192060:91193155	chr1	91192060	91193155	chr1	91192060	91192198	chr1-91192087:91192991	chr1	91192087	91192991	chr1
chr1	91300285	91301961	0.103448275862069	0.213185455124634	0.137931034482759	0.0769230769230769	0.478506834760889	0.240642698295787	50	0.00152303452516045	HypoHigh	chr1	91297754	91317039	Intron1	-	RP4-665J23.1	lincRNA	chr1	91300285	91301961	1	0.0869069224786103	CpG: 86	chr1	91300979	91301891	chr1	91300979	91301891	*	*	*	*	*	0	0	chr1-91301625:91302035	chr1	91301625	91302035	chr1	91301625	91301961	chr1-91301830:91302090	chr1	91301830	91302090	chr1
chr1	91673575	91677239	-0.046536796536796	0.232688850882829	0.882151029748284	0.948684210526316	0.443419461223545	0.167752778258549	29	0.0208562124223712	HypoHigh	*	*	*	InterGenic	*	*	*	*	*	*	*	*	*	*	*	*	*	0	0	*	*	*	*	*	0	0	*	*	*	*	*	0	0	*	*	*	*	*
chr1	91872560	91877128	-0.111111111111111	0.323945553717101	0.888888888888889	0.956521739130435	0.425054327594952	0.137938950101211	20	0.00799427134683615	HypoHigh	*	*	*	InterGenic	*	*	*	*	*	*	*	*	*	*	*	*	*	0	0	*	*	*	*	*	0	0	chr1-91876380:91876655	chr1	91876380	91876655	chr1	91876380	91876655	chr1-91876253:91876483	chr1	91876253	91876483	chr1
chr1	91991899	91993639	0.066666666666667	-0.218951799532938	0.966666666666667	0.928571428571429	0	0.417209722462608	16	0.0255020732293039	HypoLow	*	*	*	InterGenic	*	*	*	*	*	*	*	*	*	*	*	*	*	0	0	*	*	*	*	*	0	0	chr1-91993360:91993630	chr1	91993360	91993630	chr1	91993360	91993630	chr1-91992225:91992509	chr1	91992225	91992509	chr1
chr1	93374978	93397762	0.083333333333333	-0.265178868639917	0.954545454545455	0.863636363636364	0.206460731559588	0.432931646898466	144	3.8038379781837e-14	HypoLow	chr1	93341988	93426932	Intron1	-	FAM69A	protein_coding	chr1	93374978	93397762	1	0.268223770954982	*	*	*	*	*	0	0	chr1:93386726-93386941	chr1	93386726	93386941	chr1	93386726	93386941	chr1-93394985:93395450	chr1	93394985	93395450	chr1	93394985	93395450	chr1-93397567:93397737	chr1	93397567	93397737	chr1
chr1	93374978	93397762	0.083333333333333	-0.265178868639917	0.954545454545455	0.863636363636364	0.206460731559588	0.432931646898466	144	3.8038379781837e-14	HypoLow	chr1	93395252	93396252	Promoter	+	RP11-386I23.1	pseudogene	chr1	93395252	93396252	0.0438904494382023	1	*	*	*	*	*	0	0	*	*	*	*	*	0	0	chr1-93394985:93395450	chr1	93394985	93395450	chr1	93395252	93395450	chr1-93395218:93395594	chr1	93395218	93395594	chr1
chr1	93374978	93397762	0.083333333333333	-0.265178868639917	0.954545454545455	0.863636363636364	0.206460731559588	0.432931646898466	144	3.8038379781837e-14	HypoLow	chr1	93396253	93399655	FirstExon	+	RP11-386I23.1	pseudogene	chr1	93396253	93397762	0.0662306882022472	0.443562610229277	*	*	*	*	*	0	0	*	*	*	*	*	0	0	*	*	*	*	*	0	0	chr1-93397567:93397737	chr1	93397567	93397737	chr1
chr1	94087358	94090448	0.0916666666666665	-0.302889879493839	0.976190476190476	0.854166666666667	0.176778062028601	0.441739842641465	25	0.00200263004918943	HypoLow	chr1	94057951	94107859	Intron5	-	BCAR3	protein_coding	chr1	94087358	94090448	1	0.061913921615773	*	*	*	*	*	0	0	chr1:94089710-94089715	chr1	94089710	94089715	chr1	94089710	94089715	chr1-94090105:94090255	chr1	94090105	94090255	chr1	94090105	94090255	chr1-94089575:94089831	chr1	94089575	94089831	chr1
chr1	94146299	94146941	0.13963133640553	0.220292892816366	0.169540229885058	0.0465367965367965	0.449104775607048	0.11268604898647	21	0.00575024483834144	HypoHigh	chr1	94140498	94171647	Intron3	-	BCAR3	protein_coding	chr1	94146299	94146941	1	0.0206106135028412	CpG: 116	chr1	94146321	94147504	chr1	94146321	94146941	*	*	*	*	*	0	0	chr1-94146260:94147035	chr1	94146260	94147035	chr1	94146299	94146941	chr1-94146937:94147397	chr1	94146937	94147397	chr1
chr1	94587066	94592523	0.121212121212121	-0.270060288699884	0.958333333333333	0.85	0.130414521209752	0.387846733707024	34	8.62006552763684e-05	HypoLow	chr1	94586689	94587689	Promoter	-	ABCA4	protein_coding	chr1	94587066	94587689	0.114165292285138	0.623	*	*	*	*	*	0	0	*	*	*	*	*	0	0	chr1-94587285:94587555	chr1	94587285	94587555	chr1	94587285	94587555	chr1-94587574:94587844	chr1	94587574	94587844	chr1
chr1	94683079	94689609	0.089855072463768	-0.257742782841639	0.96	0.85	0.240642698295787	0.45698353148489	38	7.32545819158382e-05	HypoLow	chr1	94674907	94685813	Intron3	-	ARHGAP29	protein_coding	chr1	94683079	94685813	0.418683001531394	0.250687694846873	*	*	*	*	*	0	0	chr1:94684511-94684818	chr1	94684511	94684818	chr1	94684511	94684818	chr1-94684840:94685090	chr1	94684840	94685090	chr1	94684840	94685090	chr1-94683720:94684284	chr1	94683720	94684284	chr1
chr1	94683079	94689609	0.089855072463768	-0.257742782841639	0.96	0.85	0.240642698295787	0.45698353148489	38	7.32545819158382e-05	HypoLow	chr1	94685814	94685948	Exon3	-	ARHGAP29	protein_coding	chr1	94685814	94685948	0.02052067381317	1	*	*	*	*	*	0	0	*	*	*	*	*	0	0	*	*	*	*	*	0	0	*	*	*	*	*
chr1	94683079	94689609	0.089855072463768	-0.257742782841639	0.96	0.85	0.240642698295787	0.45698353148489	38	7.32545819158382e-05	HypoLow	chr1	94685949	94696962	Intron2	-	ARHGAP29	protein_coding	chr1	94685949	94689609	0.560490045941807	0.33233451375647	*	*	*	*	*	0	0	*	*	*	*	*	0	0	chr1-94687820:94687970	chr1	94687820	94687970	chr1	94687820	94687970	*	*	*	*	*
chr1	95393032	95393428	0.214285714285714	-0.289464243003454	0.9375	0.666666666666667	0.181188147733199	0.61412366439237	16	0.00224217013702271	HyperLow	chr1	95392835	95393835	Promoter	-	CNN3	protein_coding	chr1	95393032	95393428	1	0.396	CpG: 137	chr1	95391837	95393116	chr1	95393032	95393116	*	*	*	*	*	0	0	chr1-95393065:95393555	chr1	95393065	95393555	chr1	95393065	95393428	chr1-95393305:95393545	chr1	95393305	95393545	chr1
chr1	95393032	95393428	0.214285714285714	-0.289464243003454	0.9375	0.666666666666667	0.181188147733199	0.61412366439237	16	0.00224217013702271	HyperLow	chr1	95392121	95393121	Promoter	+	RP4-639F20.1	antisense	chr1	95393032	95393121	0.224747474747475	0.089	CpG: 137	chr1	95391837	95393116	chr1	95393032	95393116	*	*	*	*	*	0	0	chr1-95393065:95393555	chr1	95393065	95393555	chr1	95393065	95393121	chr1-95393111:95393404	chr1	95393111	95393404	chr1
chr1	95393032	95393428	0.214285714285714	-0.289464243003454	0.9375	0.666666666666667	0.181188147733199	0.61412366439237	16	0.00224217013702271	HyperLow	chr1	95393122	95393181	FirstExon	+	RP4-639F20.1	antisense	chr1	95393122	95393181	0.148989898989899	1	*	*	*	*	*	0	0	*	*	*	*	*	0	0	chr1-95393065:95393555	chr1	95393065	95393555	chr1	95393122	95393181	chr1-95393131:95393655	chr1	95393131	95393655	chr1
chr1	95393032	95393428	0.214285714285714	-0.289464243003454	0.9375	0.666666666666667	0.181188147733199	0.61412366439237	16	0.00224217013702271	HyperLow	chr1	95393182	95393906	Intron1	+	RP4-639F20.1	antisense	chr1	95393182	95393428	0.621212121212121	0.339779005524862	*	*	*	*	*	0	0	*	*	*	*	*	0	0	chr1-95393065:95393555	chr1	95393065	95393555	chr1	95393182	95393428	chr1-95393305:95393545	chr1	95393305	95393545	chr1
chr1	95610394	95625891	-0.061575507395941	0.203216900674396	0.836021505376344	0.942810457516339	0.436319524342446	0.206949200038446	67	0.000883029813990653	HypoHigh	chr1	95609613	95614257	Intron2	+	TMEM56	protein_coding	chr1	95610394	95614257	0.249274053042524	0.83182601205857	*	*	*	*	*	0	0	*	*	*	*	*	0	0	*	*	*	*	*	0	0	chr1-95613784:95614068	chr1	95613784	95614068	chr1
chr1	95610394	95625891	-0.061575507395941	0.203216900674396	0.836021505376344	0.942810457516339	0.436319524342446	0.206949200038446	67	0.000883029813990653	HypoHigh	chr1	95614258	95614347	Exon3	+	TMEM56	protein_coding	chr1	95614258	95614347	0.00574304704136284	1	*	*	*	*	*	0	0	*	*	*	*	*	0	0	*	*	*	*	*	0	0	*	*	*	*	*
chr1	95610394	95625891	-0.061575507395941	0.203216900674396	0.836021505376344	0.942810457516339	0.436319524342446	0.206949200038446	67	0.000883029813990653	HypoHigh	chr1	95614348	95615763	Intron3	+	TMEM56	protein_coding	chr1	95614348	95615763	0.091307995095825	1	*	*	*	*	*	0	0	*	*	*	*	*	0	0	chr1-95614540:95614690	chr1	95614540	95614690	chr1	95614540	95614690	chr1-95615309:95615829	chr1	95615309	95615829	chr1
chr1	95610394	95625891	-0.061575507395941	0.203216900674396	0.836021505376344	0.942810457516339	0.436319524342446	0.206949200038446	67	0.000883029813990653	HypoHigh	chr1	95615764	95615822	Exon4	+	TMEM56	protein_coding	chr1	95615764	95615822	0.00374265986965219	1	*	*	*	*	*	0	0	*	*	*	*	*	0	0	*	*	*	*	*	0	0	chr1-95615309:95615829	chr1	95615309	95615829	chr1
chr1	95610394	95625891	-0.061575507395941	0.203216900674396	0.836021505376344	0.942810457516339	0.436319524342446	0.206949200038446	67	0.000883029813990653	HypoHigh	chr1	95615823	95616880	Intron4	+	TMEM56	protein_coding	chr1	95615823	95616880	0.0682067496934891	1	*	*	*	*	*	0	0	*	*	*	*	*	0	0	*	*	*	*	*	0	0	chr1-95616166:95616344	chr1	95616166	95616344	chr1
chr1	95610394	95625891	-0.061575507395941	0.203216900674396	0.836021505376344	0.942810457516339	0.436319524342446	0.206949200038446	67	0.000883029813990653	HypoHigh	chr1	95616881	95616975	Exon5	+	TMEM56	protein_coding	chr1	95616881	95616975	0.00606569013357424	1	*	*	*	*	*	0	0	*	*	*	*	*	0	0	*	*	*	*	*	0	0	*	*	*	*	*
chr1	95610394	95625891	-0.061575507395941	0.203216900674396	0.836021505376344	0.942810457516339	0.436319524342446	0.206949200038446	67	0.000883029813990653	HypoHigh	chr1	95616976	95639371	Intron5	+	TMEM56	protein_coding	chr1	95616976	95625891	0.575272633412919	0.398079928555481	*	*	*	*	*	0	0	*	*	*	*	*	0	0	chr1-95619780:95619930	chr1	95619780	95619930	chr1	95619780	95619930	chr1-95622349:95622425	chr1	95622349	95622425	chr1
chr1	95610394	95625891	-0.061575507395941	0.203216900674396	0.836021505376344	0.942810457516339	0.436319524342446	0.206949200038446	67	0.000883029813990653	HypoHigh	chr1	95609613	95614257	Intron2	+	RP11-57H12.6	protein_coding	chr1	95610394	95614257	0.249274053042524	0.83182601205857	*	*	*	*	*	0	0	*	*	*	*	*	0	0	*	*	*	*	*	0	0	chr1-95613784:95614068	chr1	95613784	95614068	chr1
chr1	95610394	95625891	-0.061575507395941	0.203216900674396	0.836021505376344	0.942810457516339	0.436319524342446	0.206949200038446	67	0.000883029813990653	HypoHigh	chr1	95614258	95614347	Exon3	+	RP11-57H12.6	protein_coding	chr1	95614258	95614347	0.00574304704136284	1	*	*	*	*	*	0	0	*	*	*	*	*	0	0	*	*	*	*	*	0	0	*	*	*	*	*
chr1	95610394	95625891	-0.061575507395941	0.203216900674396	0.836021505376344	0.942810457516339	0.436319524342446	0.206949200038446	67	0.000883029813990653	HypoHigh	chr1	95614348	95615763	Intron3	+	RP11-57H12.6	protein_coding	chr1	95614348	95615763	0.091307995095825	1	*	*	*	*	*	0	0	*	*	*	*	*	0	0	chr1-95614540:95614690	chr1	95614540	95614690	chr1	95614540	95614690	chr1-95615309:95615829	chr1	95615309	95615829	chr1
chr1	95610394	95625891	-0.061575507395941	0.203216900674396	0.836021505376344	0.942810457516339	0.436319524342446	0.206949200038446	67	0.000883029813990653	HypoHigh	chr1	95615764	95615822	Exon4	+	RP11-57H12.6	protein_coding	chr1	95615764	95615822	0.00374265986965219	1	*	*	*	*	*	0	0	*	*	*	*	*	0	0	*	*	*	*	*	0	0	chr1-95615309:95615829	chr1	95615309	95615829	chr1
chr1	95610394	95625891	-0.061575507395941	0.203216900674396	0.836021505376344	0.942810457516339	0.436319524342446	0.206949200038446	67	0.000883029813990653	HypoHigh	chr1	95615823	95616880	Intron4	+	RP11-57H12.6	protein_coding	chr1	95615823	95616880	0.0682067496934891	1	*	*	*	*	*	0	0	*	*	*	*	*	0	0	*	*	*	*	*	0	0	chr1-95616166:95616344	chr1	95616166	95616344	chr1
chr1	95610394	95625891	-0.061575507395941	0.203216900674396	0.836021505376344	0.942810457516339	0.436319524342446	0.206949200038446	67	0.000883029813990653	HypoHigh	chr1	95616881	95616975	Exon5	+	RP11-57H12.6	protein_coding	chr1	95616881	95616975	0.00606569013357424	1	*	*	*	*	*	0	0	*	*	*	*	*	0	0	*	*	*	*	*	0	0	*	*	*	*	*
chr1	95610394	95625891	-0.061575507395941	0.203216900674396	0.836021505376344	0.942810457516339	0.436319524342446	0.206949200038446	67	0.000883029813990653	HypoHigh	chr1	95616976	95639371	Intron5	+	RP11-57H12.6	protein_coding	chr1	95616976	95625891	0.575272633412919	0.398079928555481	*	*	*	*	*	0	0	*	*	*	*	*	0	0	chr1-95619780:95619930	chr1	95619780	95619930	chr1	95619780	95619930	chr1-95622349:95622425	chr1	95622349	95622425	chr1
chr1	96127060	96128978	0.0625	-0.29731868702769	0.947368421052632	0.846153846153846	0.181188147733199	0.482205555876069	18	0.0722373232816104	HypoLow	*	*	*	InterGenic	*	*	*	*	*	*	*	*	*	*	*	*	*	0	0	*	*	*	*	*	0	0	*	*	*	*	*	0	0	chr1-96128511:96128871	chr1	96128511	96128871	chr1
chr1	96466744	96530105	0.083333333333333	-0.214989321119614	1	0.870967741935484	0.15633186452976	0.382944951426972	316	2.7560508609445e-35	HypoLow	chr1	96461751	96488088	Intron2	+	RP11-147C23.1	protein_coding	chr1	96466744	96488088	0.33686337021196	0.810418802445229	*	*	*	*	*	0	0	chr1:96476779-96477021	chr1	96476779	96477021	chr1	96476779	96477021	chr1-96477320:96477490	chr1	96477320	96477490	chr1	96477320	96477490	chr1-96485922:96486302	chr1	96485922	96486302	chr1
chr1	96466744	96530105	0.083333333333333	-0.214989321119614	1	0.870967741935484	0.15633186452976	0.382944951426972	316	2.7560508609445e-35	HypoLow	chr1	96488089	96488436	LastExon	+	RP11-147C23.1	protein_coding	chr1	96488089	96488436	0.0054765549786146	1	*	*	*	*	*	0	0	*	*	*	*	*	0	0	*	*	*	*	*	0	0	*	*	*	*	*
chr1	97112577	97121655	0.059027777777778	-0.220009497079705	0.967708333333334	0.898989898989899	0.127079315045022	0.435891878428747	45	5.35751263001042e-05	HypoLow	*	*	*	InterGenic	*	*	*	*	*	*	*	*	*	*	*	*	*	0	0	*	*	*	*	*	0	0	chr1-97117180:97117395	chr1	97117180	97117395	chr1	97117180	97117395	chr1-97117152:97117436	chr1	97117152	97117436	chr1
chr1	98453876	98467708	0.0775091575091575	-0.254329666371013	1	0.9	0.127079315045022	0.353259194614244	71	2.05482611787529e-11	HypoLow	*	*	*	InterGenic	*	*	*	*	*	*	*	*	*	*	*	*	*	0	0	chr1:98459458-98459857	chr1	98459458	98459857	chr1	98459458	98459857	chr1-98467360:98467630	chr1	98467360	98467630	chr1	98467360	98467630	chr1-98467432:98467686	chr1	98467432	98467686	chr1
chr1	98514093	98514317	0.170620939530235	0.230527120604135	0.208695652173913	0.0477272727272728	0.592284186735066	0.343995673097937	9	0.0458395301651684	HypoHigh	*	*	*	InterGenic	*	*	*	*	*	*	*	*	*	*	*	*	*	0	0	*	*	*	*	*	0	0	chr1-98513860:98514255	chr1	98513860	98514255	chr1	98514093	98514255	chr1-98514252:98514660	chr1	98514252	98514660	chr1
chr1	98521349	98550360	0.100595238095238	-0.227172075774949	0.964285714285714	0.85	0.196907972880217	0.45698353148489	125	1.2380093138455e-15	HypoLow	*	*	*	InterGenic	*	*	*	*	*	*	*	*	*	*	*	*	*	0	0	*	*	*	*	*	0	0	chr1-98549860:98550090	chr1	98549860	98550090	chr1	98549860	98550090	chr1-98547531:98547851	chr1	98547531	98547851	chr1
chr1	98943154	98949494	0.104714912280702	-0.213131682501246	1	0.88562091503268	0.120765276943716	0.320321349147893	39	1.43685140687542e-05	HypoLow	*	*	*	InterGenic	*	*	*	*	*	*	*	*	*	*	*	*	*	0	0	*	*	*	*	*	0	0	chr1-98948240:98948490	chr1	98948240	98948490	chr1	98948240	98948490	chr1-98947271:98947686	chr1	98947271	98947686	chr1
chr1	99008417	99014659	-0.018965517241379	0.209247382605709	0.869565217391304	0.933333333333333	0.507309364962454	0.167752778258549	26	0.204030425363272	HypoHigh	*	*	*	InterGenic	*	*	*	*	*	*	*	*	*	*	*	*	*	0	0	*	*	*	*	*	0	0	chr1-99014160:99014370	chr1	99014160	99014370	chr1	99014160	99014370	chr1-99013365:99013610	chr1	99013365	99013610	chr1
chr1	99235400	99238799	-0.103084415584415	0.233201893697129	0.816666666666667	0.911067193675889	0.560425456534194	0.272229696105007	19	0.00436124126415306	HypoHigh	*	*	*	InterGenic	*	*	*	*	*	*	*	*	*	*	*	*	*	0	0	*	*	*	*	*	0	0	*	*	*	*	*	0	0	*	*	*	*	*
chr1	99466834	99469322	0.06060606060606	-0.233339739518578	0.933333333333333	0.769230769230769	0.331343403825652	0.626654982909037	22	0.0265901909675511	HypoLow	chr1	99422298	99469990	Intron1	-	LPPR5	protein_coding	chr1	99466834	99469322	1	0.0521680785037323	*	*	*	*	*	0	0	*	*	*	*	*	0	0	chr1-99468745:99469035	chr1	99468745	99469035	chr1	99468745	99469035	chr1-99469310:99470280	chr1	99469310	99470280	chr1
chr1	99466834	99469322	0.06060606060606	-0.233339739518578	0.933333333333333	0.769230769230769	0.331343403825652	0.626654982909037	22	0.0265901909675511	HypoLow	chr1	99468831	99469831	Promoter	+	RP5-896L10.1	antisense	chr1	99468831	99469322	0.197347266881029	0.491	*	*	*	*	*	0	0	*	*	*	*	*	0	0	chr1-99468745:99469035	chr1	99468745	99469035	chr1	99468831	99469035	chr1-99469310:99470280	chr1	99469310	99470280	chr1
chr1	100118153	100122416	-0.0383695252116305	0.235602743580917	0.882307692307692	0.945906432748538	0.405732181044359	0.204197738277168	23	0.0583742252218864	HypoHigh	chr1	100111919	100127874	Intron1	+	PALMD	protein_coding	chr1	100118153	100122416	1	0.267188968975243	*	*	*	*	*	0	0	*	*	*	*	*	0	0	chr1-100122340:100122590	chr1	100122340	100122590	chr1	100122340	100122416	chr1-100122294:100123121	chr1	100122294	100123121	chr1
chr1	101178474	101178951	-0.188732078853046	-0.271829052140553	0.0333704115684093	0.22875816993464	0.193867933397604	0.469594543680479	11	0.00272464474982349	HypoLow	*	*	*	InterGenic	*	*	*	*	*	*	*	*	*	*	*	*	*	0	0	*	*	*	*	*	0	0	chr1-101178660:101178830	chr1	101178660	101178830	chr1	101178660	101178830	chr1-101178644:101178858	chr1	101178644	101178858	chr1
chr1	102062185	102064900	-0.117647058823529	0.222854814399865	0.84	0.933333333333333	0.528320833573719	0.318144667641655	22	0.0353857131099292	HypoHigh	*	*	*	InterGenic	*	*	*	*	*	*	*	*	*	*	*	*	*	0	0	*	*	*	*	*	0	0	*	*	*	*	*	0	0	*	*	*	*	*
chr1	102150757	102155684	-0.128787878787879	0.204844443203217	0.6875	0.894736842105263	0.494451918327229	0.257742782841639	28	0.173733255771812	HypoHigh	*	*	*	InterGenic	*	*	*	*	*	*	*	*	*	*	*	*	*	0	0	*	*	*	*	*	0	0	chr1-102153920:102154090	chr1	102153920	102154090	chr1	102153920	102154090	*	*	*	*	*
chr1	102436505	102438534	-0.157102157102157	0.38230745392431	0.769736842105263	0.976190476190476	0.5	0.200587585838125	11	0.00919658110420455	HypoHigh	chr1	102302582	102462303	Intron1	-	OLFM3	protein_coding	chr1	102436505	102438534	1	0.0127034015564641	*	*	*	*	*	0	0	*	*	*	*	*	0	0	*	*	*	*	*	0	0	chr1-102436946:102437186	chr1	102436946	102437186	chr1
chr1	106386655	106387562	-0.157894736842105	0.210885691483479	0.64	0.818181818181818	0.558912343350711	0.307309364962454	10	0.133119875403451	HypoHigh	*	*	*	InterGenic	*	*	*	*	*	*	*	*	*	*	*	*	*	0	0	*	*	*	*	*	0	0	*	*	*	*	*	0	0	*	*	*	*	*
chr1	106820897	106832083	-0.08	0.208449702432464	0.625	0.818181818181818	0.574436111271368	0.270426041486378	40	0.179984994319105	HypoHigh	*	*	*	InterGenic	*	*	*	*	*	*	*	*	*	*	*	*	*	0	0	*	*	*	*	*	0	0	chr1-106829640:106829810	chr1	106829640	106829810	chr1	106829640	106829810	chr1-106832016:106832652	chr1	106832016	106832652	chr1
chr1	107741206	107746887	0.371967545638945	0.23471464553685	0.879679144385026	0.338095238095238	0.431912600179337	0.198931144141325	17	0.0282343586112246	HyperHigh	chr1	107691462	107866903	Intron2	+	NTNG1	protein_coding	chr1	107741206	107746887	1	0.0323812563767876	*	*	*	*	*	0	0	*	*	*	*	*	0	0	chr1-107742380:107742530	chr1	107742380	107742530	chr1	107742380	107742530	chr1-107744797:107745167	chr1	107744797	107745167	chr1
chr1	107951357	107955564	-0.038461538461538	0.209514082084225	0.935483870967742	0.956521739130435	0.365845946613985	0.130414521209752	32	0.0649689942773937	HypoHigh	chr1	107950331	107961201	Intron5	+	NTNG1	protein_coding	chr1	107951357	107955564	1	0.387028518859246	*	*	*	*	*	0	0	*	*	*	*	*	0	0	*	*	*	*	*	0	0	chr1-107953430:107953674	chr1	107953430	107953674	chr1
chr1	109184669	109191308	0.0918653576437587	-0.20210415758366	0.908902691511387	0.686274509803922	0.215038142501471	0.397806549445212	61	0.00493014195315809	HypoLow	chr1	109172280	109187317	Intron10	+	FAM102B	protein_coding	chr1	109184669	109187317	0.398855249284531	0.176098955908758	*	*	*	*	*	0	0	*	*	*	*	*	0	0	chr1-109186965:109187115	chr1	109186965	109187115	chr1	109186965	109187115	chr1-109186646:109186990	chr1	109186646	109186990	chr1
chr1	109184669	109191308	0.0918653576437587	-0.20210415758366	0.908902691511387	0.686274509803922	0.215038142501471	0.397806549445212	61	0.00493014195315809	HypoLow	chr1	109187318	109187522	LastExon	+	FAM102B	protein_coding	chr1	109187318	109187522	0.0307275192046995	1	*	*	*	*	*	0	0	*	*	*	*	*	0	0	*	*	*	*	*	0	0	chr1-109187433:109188094	chr1	109187433	109188094	chr1
chr1	109184669	109191308	0.0918653576437587	-0.20210415758366	0.908902691511387	0.686274509803922	0.215038142501471	0.397806549445212	61	0.00493014195315809	HypoLow	chr1	109190917	109191613	LastExon	-	HENMT1	protein_coding	chr1	109190917	109191308	0.0588944118090074	0.561781609195402	*	*	*	*	*	0	0	*	*	*	*	*	0	0	chr1-109191260:109191430	chr1	109191260	109191430	chr1	109191260	109191308	chr1-109190609:109191059	chr1	109190609	109191059	chr1
chr1	109575083	109578243	0.086442577030812	-0.232522701177411	0.980769230769231	0.878676470588236	0.130414521209752	0.344521781389235	33	0.000382458473830352	HypoLow	chr1	109566144	109584483	Intron1	-	WDR47	protein_coding	chr1	109575083	109578243	1	0.172310376792628	*	*	*	*	*	0	0	*	*	*	*	*	0	0	chr1-109577780:109577930	chr1	109577780	109577930	chr1	109577780	109577930	chr1-109577584:109577960	chr1	109577584	109577960	chr1
chr1	109806201	109806572	0.20986177565125	0.269859662827076	0.566271551724138	0.226923076923077	0.602919508852087	0.399326210918454	9	0.104895104895105	HyperHigh	chr1	109805890	109806232	Intron8	+	CELSR2	protein_coding	chr1	109806201	109806232	0.0835579514824798	0.0906432748538012	*	*	*	*	*	0	0	*	*	*	*	*	0	0	chr1-109806205:109806535	chr1	109806205	109806535	chr1	109806205	109806232	chr1-109806229:109806609	chr1	109806229	109806609	chr1
chr1	109806201	109806572	0.20986177565125	0.269859662827076	0.566271551724138	0.226923076923077	0.602919508852087	0.399326210918454	9	0.104895104895105	HyperHigh	chr1	109806233	109806399	Exon9	+	CELSR2	protein_coding	chr1	109806233	109806399	0.44743935309973	1	*	*	*	*	*	0	0	*	*	*	*	*	0	0	chr1-109806205:109806535	chr1	109806205	109806535	chr1	109806233	109806399	chr1-109806348:109806793	chr1	109806348	109806793	chr1
chr1	109806201	109806572	0.20986177565125	0.269859662827076	0.566271551724138	0.226923076923077	0.602919508852087	0.399326210918454	9	0.104895104895105	HyperHigh	chr1	109806400	109806699	Intron9	+	CELSR2	protein_coding	chr1	109806400	109806572	0.463611859838275	0.575250836120401	*	*	*	*	*	0	0	*	*	*	*	*	0	0	chr1-109806205:109806535	chr1	109806205	109806535	chr1	109806400	109806535	chr1-109806493:109806913	chr1	109806493	109806913	chr1
chr1	109845131	109849023	0.054093567251462	-0.205842801830477	0.962962962962963	0.894736842105263	0.123744108880292	0.381483769492129	41	2.9391454161823e-05	HypoLow	chr1	109840880	109849468	Intron1	-	MYBPHL	protein_coding	chr1	109845131	109849023	1	0.453190498369818	*	*	*	*	*	0	0	*	*	*	*	*	0	0	chr1-109848905:109849155	chr1	109848905	109849155	chr1	109848905	109849023	chr1-109848998:109849274	chr1	109848998	109849274	chr1
chr1	110028708	110030794	0.071794871794872	-0.252313293121926	1	0.906521739130435	0.061872054440146	0.380863029508907	27	2.92998925047947e-05	HypoLow	chr1	110028679	110028744	Exon2	+	ATXN7L2	protein_coding	chr1	110028708	110028744	0.0172579098753595	0.553846153846154	*	*	*	*	*	0	0	*	*	*	*	*	0	0	*	*	*	*	*	0	0	*	*	*	*	*
chr1	110028708	110030794	0.071794871794872	-0.252313293121926	1	0.906521739130435	0.061872054440146	0.380863029508907	27	2.92998925047947e-05	HypoLow	chr1	110028745	110029127	Intron2	+	ATXN7L2	protein_coding	chr1	110028745	110029127	0.183125599232982	1	*	*	*	*	*	0	0	*	*	*	*	*	0	0	*	*	*	*	*	0	0	chr1-110028762:110029538	chr1	110028762	110029538	chr1
chr1	110028708	110030794	0.071794871794872	-0.252313293121926	1	0.906521739130435	0.061872054440146	0.380863029508907	27	2.92998925047947e-05	HypoLow	chr1	110029128	110029232	Exon3	+	ATXN7L2	protein_coding	chr1	110029128	110029232	0.049856184084372	1	*	*	*	*	*	0	0	*	*	*	*	*	0	0	*	*	*	*	*	0	0	chr1-110028762:110029538	chr1	110028762	110029538	chr1
chr1	110028708	110030794	0.071794871794872	-0.252313293121926	1	0.906521739130435	0.061872054440146	0.380863029508907	27	2.92998925047947e-05	HypoLow	chr1	110029233	110029628	Intron3	+	ATXN7L2	protein_coding	chr1	110029233	110029628	0.189357622243528	1	*	*	*	*	*	0	0	*	*	*	*	*	0	0	chr1-110029480:110029635	chr1	110029480	110029635	chr1	110029480	110029628	chr1-110028762:110029538	chr1	110028762	110029538	chr1
chr1	110028708	110030794	0.071794871794872	-0.252313293121926	1	0.906521739130435	0.061872054440146	0.380863029508907	27	2.92998925047947e-05	HypoLow	chr1	110029629	110029839	Exon4	+	ATXN7L2	protein_coding	chr1	110029629	110029839	0.100671140939597	1	*	*	*	*	*	0	0	*	*	*	*	*	0	0	chr1-110029700:110029915	chr1	110029700	110029915	chr1	110029700	110029839	*	*	*	*	*
chr1	110028708	110030794	0.071794871794872	-0.252313293121926	1	0.906521739130435	0.061872054440146	0.380863029508907	27	2.92998925047947e-05	HypoLow	chr1	110029840	110030235	Intron4	+	ATXN7L2	protein_coding	chr1	110029840	110030235	0.189357622243528	1	*	*	*	*	*	0	0	*	*	*	*	*	0	0	chr1-110030160:110030355	chr1	110030160	110030355	chr1	110030160	110030235	*	*	*	*	*
chr1	110028708	110030794	0.071794871794872	-0.252313293121926	1	0.906521739130435	0.061872054440146	0.380863029508907	27	2.92998925047947e-05	HypoLow	chr1	110030236	110030426	Exon5	+	ATXN7L2	protein_coding	chr1	110030236	110030426	0.0910834132310642	1	*	*	*	*	*	0	0	*	*	*	*	*	0	0	chr1-110030160:110030355	chr1	110030160	110030355	chr1	110030236	110030355	*	*	*	*	*
chr1	110028708	110030794	0.071794871794872	-0.252313293121926	1	0.906521739130435	0.061872054440146	0.380863029508907	27	2.92998925047947e-05	HypoLow	chr1	110030427	110031004	Intron5	+	ATXN7L2	protein_coding	chr1	110030427	110030794	0.175934803451582	0.636048526863085	*	*	*	*	*	0	0	*	*	*	*	*	0	0	chr1-110030745:110030895	chr1	110030745	110030895	chr1	110030745	110030794	chr1-110030644:110031584	chr1	110030644	110031584	chr1
chr1	110040149	110041387	-0.334615384615385	0.0497707605386141	0.352941176470588	0.75	0.528320833573719	0.486382639009082	18	0.00876427720043586	HypoHigh	chr1	110038878	110045004	Intron3	+	CYB561D1	protein_coding	chr1	110040149	110041387	1	0.202089454782893	*	*	*	*	*	0	0	*	*	*	*	*	0	0	chr1-110040980:110041270	chr1	110040980	110041270	chr1	110040980	110041270	chr1-110041120:110041207	chr1	110041120	110041207	chr1
chr1	110254208	110255447	0.269121667805878	-0.00802407187610102	0.730676328502415	0.348484848484849	0.523603201363996	0.547567036477042	37	2.85017591987309e-05	HyperHigh	chr1	110253876	110254876	Promoter	+	GSTM5	protein_coding	chr1	110254208	110254876	0.539144471347861	0.668	*	*	*	*	*	0	0	*	*	*	*	*	0	0	chr1-110254700:110255135	chr1	110254700	110255135	chr1	110254700	110254876	chr1-110254509:110254959	chr1	110254509	110254959	chr1
chr1	110254208	110255447	0.269121667805878	-0.00802407187610102	0.730676328502415	0.348484848484849	0.523603201363996	0.547567036477042	37	2.85017591987309e-05	HyperHigh	chr1	110254877	110254970	FirstExon	+	GSTM5	protein_coding	chr1	110254877	110254970	0.0750605326876513	1	*	*	*	*	*	0	0	*	*	*	*	*	0	0	chr1-110254700:110255135	chr1	110254700	110255135	chr1	110254877	110254970	chr1-110254509:110254959	chr1	110254509	110254959	chr1
chr1	110254208	110255447	0.269121667805878	-0.00802407187610102	0.730676328502415	0.348484848484849	0.523603201363996	0.547567036477042	37	2.85017591987309e-05	HyperHigh	chr1	110254971	110255239	Intron1	+	GSTM5	protein_coding	chr1	110254971	110255239	0.216303470540759	1	*	*	*	*	*	0	0	*	*	*	*	*	0	0	chr1-110254700:110255135	chr1	110254700	110255135	chr1	110254971	110255135	*	*	*	*	*
chr1	110254208	110255447	0.269121667805878	-0.00802407187610102	0.730676328502415	0.348484848484849	0.523603201363996	0.547567036477042	37	2.85017591987309e-05	HyperHigh	chr1	110255240	110255315	Exon2	+	GSTM5	protein_coding	chr1	110255240	110255315	0.0605326876513317	1	*	*	*	*	*	0	0	*	*	*	*	*	0	0	chr1-110255285:110255655	chr1	110255285	110255655	chr1	110255285	110255315	*	*	*	*	*
chr1	110254208	110255447	0.269121667805878	-0.00802407187610102	0.730676328502415	0.348484848484849	0.523603201363996	0.547567036477042	37	2.85017591987309e-05	HyperHigh	chr1	110255316	110255740	Intron2	+	GSTM5	protein_coding	chr1	110255316	110255447	0.105730427764326	0.308962264150943	*	*	*	*	*	0	0	*	*	*	*	*	0	0	chr1-110255285:110255655	chr1	110255285	110255655	chr1	110255316	110255447	*	*	*	*	*
chr1	110365824	110372098	0.0625	-0.228012811879681	1	0.888888888888889	0.137938950101211	0.385593216482346	64	1.95263083375206e-06	HypoLow	chr1	110369976	110370976	Promoter	+	RP4-735C1.6	lincRNA	chr1	110369976	110370976	0.15938795027096	1	*	*	*	*	*	0	0	*	*	*	*	*	0	0	chr1-110370160:110370455	chr1	110370160	110370455	chr1	110370160	110370455	chr1-110370752:110370992	chr1	110370752	110370992	chr1
chr1	110365824	110372098	0.0625	-0.228012811879681	1	0.888888888888889	0.137938950101211	0.385593216482346	64	1.95263083375206e-06	HypoLow	chr1	110370977	110371073	FirstExon	+	RP4-735C1.6	lincRNA	chr1	110370977	110371073	0.0153012432260121	1	*	*	*	*	*	0	0	*	*	*	*	*	0	0	*	*	*	*	*	0	0	chr1-110370752:110370992	chr1	110370752	110370992	chr1
chr1	110365824	110372098	0.0625	-0.228012811879681	1	0.888888888888889	0.137938950101211	0.385593216482346	64	1.95263083375206e-06	HypoLow	chr1	110371074	110371558	Intron1	+	RP4-735C1.6	lincRNA	chr1	110371074	110371558	0.0771437679311444	1	*	*	*	*	*	0	0	*	*	*	*	*	0	0	chr1-110371520:110372050	chr1	110371520	110372050	chr1	110371520	110371558	chr1-110371331:110371781	chr1	110371331	110371781	chr1
chr1	110365824	110372098	0.0625	-0.228012811879681	1	0.888888888888889	0.137938950101211	0.385593216482346	64	1.95263083375206e-06	HypoLow	chr1	110371559	110371752	Exon2	+	RP4-735C1.6	lincRNA	chr1	110371559	110371752	0.0307618744022952	1	*	*	*	*	*	0	0	*	*	*	*	*	0	0	chr1-110371520:110372050	chr1	110371520	110372050	chr1	110371559	110371752	chr1-110371331:110371781	chr1	110371331	110371781	chr1
chr1	110365824	110372098	0.0625	-0.228012811879681	1	0.888888888888889	0.137938950101211	0.385593216482346	64	1.95263083375206e-06	HypoLow	chr1	110371753	110375921	Intron2	+	RP4-735C1.6	lincRNA	chr1	110371753	110372098	0.054988842843481	0.0827735124760077	*	*	*	*	*	0	0	*	*	*	*	*	0	0	chr1-110371520:110372050	chr1	110371520	110372050	chr1	110371753	110372050	chr1-110371852:110372152	chr1	110371852	110372152	chr1
chr1	110415365	110418852	0.115384615384615	-0.204776945053089	0.95	0.84	0.216674140549451	0.399394649303933	24	0.0012557964859244	HypoLow	*	*	*	InterGenic	*	*	*	*	*	*	*	*	*	*	*	*	*	0	0	chr1:110418068-110418377	chr1	110418068	110418377	chr1	110418068	110418377	chr1-110418820:110418970	chr1	110418820	110418970	chr1	110418820	110418852	chr1-110418574:110418864	chr1	110418574	110418864	chr1
chr1	110440177	110446095	0.056248590119558	-0.20249731016775	0.956521739130435	0.881176470588235	0.162042321394155	0.353759374819711	53	4.3841756875191e-05	HypoLow	chr1	110438595	110440483	FirstExon	+	RP11-195M16.3	lincRNA	chr1	110440177	110440483	0.051706657654613	0.162076271186441	*	*	*	*	*	0	0	chr1:110439976-110440401	chr1	110439976	110440401	chr1	110440177	110440401	chr1-110440280:110440635	chr1	110440280	110440635	chr1	110440280	110440483	chr1-110440276:110440536	chr1	110440276	110440536	chr1
chr1	110764500	110765397	-0.54059829059829	-0.206030552717492	0.145833333333333	0.881944444444444	0.326685496456675	0.432632542500155	7	0.0151515151515152	HypoLow	chr1	110754800	110825155	Intron1	+	KCNC4	protein_coding	chr1	110764500	110765397	1	0.0127496268921896	*	*	*	*	*	0	0	*	*	*	*	*	0	0	chr1-110765325:110765475	chr1	110765325	110765475	chr1	110765325	110765397	*	*	*	*	*
chr1	110834257	110843279	0.065079365079365	-0.215009302606216	0.952380952380952	0.865151515151515	0.257634674316434	0.459594497828725	71	0.000168713052048114	HypoLow	chr1	110831194	110835008	Intron3	-	RP5-1074L1.1	antisense	chr1	110834257	110835008	0.0832409665262691	0.196906135291033	*	*	*	*	*	0	0	*	*	*	*	*	0	0	chr1-110834840:110834875	chr1	110834840	110834875	chr1	110834840	110834875	chr1-110835004:110835408	chr1	110835004	110835408	chr1
chr1	110834257	110843279	0.065079365079365	-0.215009302606216	0.952380952380952	0.865151515151515	0.257634674316434	0.459594497828725	71	0.000168713052048114	HypoLow	chr1	110835009	110835129	Exon3	-	RP5-1074L1.1	antisense	chr1	110835009	110835129	0.0133008202172467	1	*	*	*	*	*	0	0	*	*	*	*	*	0	0	chr1-110835060:110835395	chr1	110835060	110835395	chr1	110835060	110835129	chr1-110835127:110835383	chr1	110835127	110835383	chr1
chr1	110834257	110843279	0.065079365079365	-0.215009302606216	0.952380952380952	0.865151515151515	0.257634674316434	0.459594497828725	71	0.000168713052048114	HypoLow	chr1	110835130	110861386	Intron2	-	RP5-1074L1.1	antisense	chr1	110835130	110843279	0.90323653291953	0.310367154174284	*	*	*	*	*	0	0	*	*	*	*	*	0	0	chr1-110843065:110843310	chr1	110843065	110843310	chr1	110843065	110843279	chr1-110841706:110841906	chr1	110841706	110841906	chr1
chr1	111144264	111146563	0.0739495798319331	-0.246470307778904	0.959166666666667	0.869318181818182	0.146498995640504	0.428992987246709	23	0.000322250200686044	HypoLow	chr1	111136551	111144651	Intron4	-	KCNA2	protein_coding	chr1	111144264	111144651	0.168334058286211	0.0477777777777778	*	*	*	*	*	0	0	*	*	*	*	*	0	0	chr1-111144505:111144655	chr1	111144505	111144655	chr1	111144505	111144651	*	*	*	*	*
chr1	111144264	111146563	0.0739495798319331	-0.246470307778904	0.959166666666667	0.869318181818182	0.146498995640504	0.428992987246709	23	0.000322250200686044	HypoLow	chr1	111144652	111144792	Exon4	-	KCNA2	protein_coding	chr1	111144652	111144792	0.0608960417572858	1	*	*	*	*	*	0	0	*	*	*	*	*	0	0	chr1-111144685:111144955	chr1	111144685	111144955	chr1	111144685	111144792	*	*	*	*	*
chr1	111144264	111146563	0.0739495798319331	-0.246470307778904	0.959166666666667	0.869318181818182	0.146498995640504	0.428992987246709	23	0.000322250200686044	HypoLow	chr1	111144793	111146510	Intron3	-	KCNA2	protein_coding	chr1	111144793	111146510	0.746846454980426	1	*	*	*	*	*	0	0	*	*	*	*	*	0	0	chr1-111146185:111146575	chr1	111146185	111146575	chr1	111146185	111146510	chr1-111145697:111145974	chr1	111145697	111145974	chr1
chr1	111144264	111146563	0.0739495798319331	-0.246470307778904	0.959166666666667	0.869318181818182	0.146498995640504	0.428992987246709	23	0.000322250200686044	HypoLow	chr1	111146511	111147567	Exon3	-	KCNA2	protein_coding	chr1	111146511	111146563	0.0226185297955633	0.0492424242424242	*	*	*	*	*	0	0	*	*	*	*	*	0	0	chr1-111146185:111146575	chr1	111146185	111146575	chr1	111146511	111146563	*	*	*	*	*
chr1	111564785	111567412	0.113756613756614	-0.368352163123342	0.954451345755694	0.804761904761905	0.151415430085132	0.461821786191785	19	0.000209971513407073	HypoLow	*	*	*	InterGenic	*	*	*	*	*	*	*	*	*	*	*	*	*	0	0	*	*	*	*	*	0	0	*	*	*	*	*	0	0	*	*	*	*	*
chr1	112053632	112057615	0.075	-0.208419410865988	0.952380952380952	0.866666666666667	0.24484330714649	0.45698353148489	34	0.0052161924215209	HypoLow	chr1	112033385	112106467	Intron1	-	ADORA3	protein_coding	chr1	112053632	112057615	1	0.0545004241810569	*	*	*	*	*	0	0	*	*	*	*	*	0	0	chr1-112057105:112057575	chr1	112057105	112057575	chr1	112057105	112057575	chr1-112057556:112058046	chr1	112057556	112058046	chr1
chr1	112283074	112283507	0.263157894736843	0.333333333333333	0.4375	0.0526315789473684	0.518885569154274	0.15633186452976	12	0.136750199988208	HyperHigh	chr1	112270427	112298322	Intron1	-	FAM212B	protein_coding	chr1	112283074	112283507	1	0.0155224950708012	CpG: 171	chr1	112281052	112283277	chr1	112283074	112283277	*	*	*	*	*	0	0	chr1-112283180:112283330	chr1	112283180	112283330	chr1	112283180	112283330	chr1-112282902:112283560	chr1	112282902	112283560	chr1
chr1	112283074	112283507	0.263157894736843	0.333333333333333	0.4375	0.0526315789473684	0.518885569154274	0.15633186452976	12	0.136750199988208	HyperHigh	chr1	112282700	112286996	Intron1	+	RP4-773A18.4	antisense	chr1	112283074	112283507	1	0.100791433891993	CpG: 171	chr1	112281052	112283277	chr1	112283074	112283277	*	*	*	*	*	0	0	chr1-112283180:112283330	chr1	112283180	112283330	chr1	112283180	112283330	chr1-112282902:112283560	chr1	112282902	112283560	chr1
chr1	112525023	112526192	-0.069047619047619	0.224731371659814	0.861904761904762	0.953260869565217	0.484901780684946	0.323650198151556	25	0.00656811873541494	HypoHigh	chr1	112524243	112525420	Exon2	-	KCND3	protein_coding	chr1	112525023	112525420	0.339606501283148	0.337298215802889	CpG: 87	chr1	112524468	112525385	chr1	112525023	112525385	*	*	*	*	*	0	0	chr1-112525365:112525955	chr1	112525365	112525955	chr1	112525365	112525420	*	*	*	*	*
chr1	112525023	112526192	-0.069047619047619	0.224731371659814	0.861904761904762	0.953260869565217	0.484901780684946	0.323650198151556	25	0.00656811873541494	HypoHigh	chr1	112525421	112531369	Intron1	-	KCND3	protein_coding	chr1	112525421	112526192	0.659538066723695	0.129623402824479	*	*	*	*	*	0	0	*	*	*	*	*	0	0	chr1-112526185:112526335	chr1	112526185	112526335	chr1	112526185	112526192	*	*	*	*	*
chr1	112606620	112607699	0.333333333333333	0.100781882174025	0.7	0.416666666666667	0.458426455179793	0.45698353148489	12	0.03848824503077	HyperHigh	*	*	*	InterGenic	*	*	*	*	*	*	*	*	*	*	*	*	*	0	0	*	*	*	*	*	0	0	chr1-112607465:112607775	chr1	112607465	112607775	chr1	112607465	112607699	chr1-112607008:112607272	chr1	112607008	112607272	chr1
chr1	113046788	113050262	0.096296296296296	-0.251684687427392	0.96969696969697	0.846153846153846	0.181188147733199	0.431820614746107	26	9.62676485302604e-06	HypoLow	chr1	113033704	113057495	Intron2	+	WNT2B	protein_coding	chr1	113046788	113050262	1	0.146021604808541	*	*	*	*	*	0	0	*	*	*	*	*	0	0	chr1-113049465:113050315	chr1	113049465	113050315	chr1	113049465	113050262	chr1-113050081:113050239	chr1	113050081	113050239	chr1
chr1	113286259	113287132	0.0909090909090909	0.21547506060659	0.181818181818182	0.0416666666666667	0.538601510646751	0.17418645817898	34	0.00512832248268677	HypoHigh	*	*	*	InterGenic	*	*	*	*	*	*	*	*	CpG: 85	chr1	113286332	113287172	chr1	113286332	113287132	*	*	*	*	*	0	0	chr1-113286960:113287215	chr1	113286960	113287215	chr1	113286960	113287132	chr1-113286941:113287200	chr1	113286941	113287200	chr1
chr1	113392885	113393094	0.279512987012987	-0.230641862801563	0.862685265911072	0.516746411483254	0.368106638834571	0.657444269295955	9	0.0404213463806163	HyperLow	chr1	113392302	113393265	FirstExon	-	RP11-426L16.8	lincRNA	chr1	113392885	113393094	1	0.217030114226376	*	*	*	*	*	0	0	*	*	*	*	*	0	0	chr1-113392280:113393270	chr1	113392280	113393270	chr1	113392885	113393094	chr1-113392050:113393029	chr1	113392050	113393029	chr1
chr1	113392885	113393094	0.279512987012987	-0.230641862801563	0.862685265911072	0.516746411483254	0.368106638834571	0.657444269295955	9	0.0404213463806163	HyperLow	chr1	113392650	113393049	FirstExon	+	RP3-522D1.1	lincRNA	chr1	113392885	113393049	0.784688995215311	0.411027568922306	*	*	*	*	*	0	0	*	*	*	*	*	0	0	chr1-113392280:113393270	chr1	113392280	113393270	chr1	113392885	113393049	chr1-113392050:113393029	chr1	113392050	113393029	chr1
chr1	113392885	113393094	0.279512987012987	-0.230641862801563	0.862685265911072	0.516746411483254	0.368106638834571	0.657444269295955	9	0.0404213463806163	HyperLow	chr1	113393050	113419561	Intron1	+	RP3-522D1.1	lincRNA	chr1	113393050	113393094	0.210526315789474	0.00165968843121723	*	*	*	*	*	0	0	*	*	*	*	*	0	0	chr1-113392280:113393270	chr1	113392280	113393270	chr1	113393050	113393094	*	*	*	*	*
chr1	113674583	113675884	0.111111111111111	-0.259783279097362	0.9375	0.761904761904762	0.216674140549451	0.5	16	0.16028415120913	HypoLow	chr1	113666497	113674882	LastExon	+	LRIG2	protein_coding	chr1	113674583	113674882	0.229823212913144	0.0356589147286822	*	*	*	*	*	0	0	*	*	*	*	*	0	0	chr1-113674645:113674795	chr1	113674645	113674795	chr1	113674645	113674795	*	*	*	*	*
chr1	113753294	113753650	0.118181818181818	-0.312116010171817	0.908088235294118	0.773993808049536	0.284526038486935	0.618462847402512	11	0.102807661826291	HypoLow	*	*	*	InterGenic	*	*	*	*	*	*	*	*	*	*	*	*	*	0	0	*	*	*	*	*	0	0	*	*	*	*	*	0	0	chr1-113753546:113753764	chr1	113753546	113753764	chr1
chr1	114018027	114026166	-0.08	0.217840438223797	0.857142857142857	0.9375	0.461477168113533	0.233280946628746	50	0.00218361914513594	HypoHigh	chr1	113933972	114092136	Intron1	+	MAGI3	protein_coding	chr1	114018027	114026166	1	0.0514592448344756	*	*	*	*	*	0	0	*	*	*	*	*	0	0	chr1-114025925:114026075	chr1	114025925	114026075	chr1	114025925	114026075	chr1-114022940:114023384	chr1	114022940	114023384	chr1
chr1	114111971	114115767	-0.115568641884431	0.226931006476603	0.813186813186813	0.948412698412698	0.478481982509533	0.243550091017914	23	0.0133062622142657	HypoHigh	chr1	114092254	114123163	Intron2	+	MAGI3	protein_coding	chr1	114111971	114115767	1	0.122812125918017	*	*	*	*	*	0	0	*	*	*	*	*	0	0	*	*	*	*	*	0	0	chr1-114113027:114113487	chr1	114113027	114113487	chr1
chr1	114601302	114605563	0.08695652173913	-0.307309364962454	0.956521739130435	0.869565217391304	0	0.464049074554845	22	0.000853554983598995	HypoLow	*	*	*	InterGenic	*	*	*	*	*	*	*	*	*	*	*	*	*	0	0	*	*	*	*	*	0	0	chr1-114605280:114605755	chr1	114605280	114605755	chr1	114605280	114605563	chr1-114604779:114605159	chr1	114604779	114605159	chr1
chr1	115397393	115397931	0.216959972394755	-0.039897711322547	0.547008547008547	0.364389233954451	0.538445645188123	0.655025861447496	21	0.00223710920516215	HyperHigh	chr1	115396423	115397423	Promoter	+	SYCP1	protein_coding	chr1	115397393	115397423	0.0557620817843866	0.03	*	*	*	*	*	0	0	*	*	*	*	*	0	0	chr1-115397420:115397575	chr1	115397420	115397575	chr1	115397420	115397423	chr1-115397391:115397613	chr1	115397391	115397613	chr1
chr1	115397393	115397931	0.216959972394755	-0.039897711322547	0.547008547008547	0.364389233954451	0.538445645188123	0.655025861447496	21	0.00223710920516215	HyperHigh	chr1	115397424	115397639	FirstExon	+	SYCP1	protein_coding	chr1	115397424	115397639	0.399628252788104	1	CpG: 37	chr1	115397448	115397942	chr1	115397448	115397639	*	*	*	*	*	0	0	chr1-115397600:115397770	chr1	115397600	115397770	chr1	115397600	115397639	chr1-115397614:115397814	chr1	115397614	115397814	chr1
chr1	115397393	115397931	0.216959972394755	-0.039897711322547	0.547008547008547	0.364389233954451	0.538445645188123	0.655025861447496	21	0.00223710920516215	HyperHigh	chr1	115397640	115398061	Intron1	+	SYCP1	protein_coding	chr1	115397640	115397931	0.54089219330855	0.691211401425178	CpG: 37	chr1	115397448	115397942	chr1	115397640	115397931	*	*	*	*	*	0	0	chr1-115397600:115397770	chr1	115397600	115397770	chr1	115397640	115397770	chr1-115397614:115397814	chr1	115397614	115397814	chr1
chr1	115508304	115519491	-0.103448275862069	0.24920483964086	0.863888888888889	0.954545454545455	0.450612369485224	0.189048060306708	65	1.12913188991265e-06	HypoHigh	chr1	115489942	115520177	Intron27	+	SYCP1	protein_coding	chr1	115508304	115519491	1	0.370001653712585	*	*	*	*	*	0	0	*	*	*	*	*	0	0	chr1-115515860:115516010	chr1	115515860	115516010	chr1	115515860	115516010	chr1-115519157:115519607	chr1	115519157	115519607	chr1
chr1	116185858	116188671	0.125	0.226612241865351	0.769230769230769	0.444444444444444	0.382944951426972	0.240642698295787	16	0.0618825667500089	HypoHigh	chr1	116184708	116193897	Intron1	+	VANGL1	protein_coding	chr1	116185858	116188671	1	0.306126890847753	*	*	*	*	*	0	0	*	*	*	*	*	0	0	chr1-116188365:116188690	chr1	116188365	116188690	chr1	116188365	116188671	chr1-116186100:116186784	chr1	116186100	116186784	chr1
chr1	116645254	116647983	-0.0965909090909089	0.385593216482346	0.888888888888889	1	0.510164352252494	0.167752778258549	20	0.00201033200228159	HypoHigh	*	*	*	InterGenic	*	*	*	*	*	*	*	*	*	*	*	*	*	0	0	*	*	*	*	*	0	0	chr1-116647705:116647930	chr1	116647705	116647930	chr1	116647705	116647930	chr1-116647413:116647676	chr1	116647413	116647676	chr1
chr1	117112514	117112726	0.376959819608514	0.161227647969334	0.530791788856305	0.121323529411764	0.506708961455685	0.272229696105007	7	0.0411255411255411	HyperHigh	chr1	117087227	117113524	Intron1	-	CD58	protein_coding	chr1	117112514	117112726	1	0.00806175609385101	*	*	*	*	*	0	0	chr1:117112460-117112738	chr1	117112460	117112738	chr1	117112514	117112726	chr1-117112480:117112915	chr1	117112480	117112915	chr1	117112514	117112726	chr1-117112670:117113856	chr1	117112670	117113856	chr1
chr1	117421299	117422222	-0.15719696969697	-0.282989884454715	0.054093567251462	0.247474747474747	0.225979547515158	0.562907291846956	15	0.000279766620105088	HypoLow	*	*	*	InterGenic	*	*	*	*	*	*	*	*	*	*	*	*	*	0	0	chr1:117421623-117422020	chr1	117421623	117422020	chr1	117421623	117422020	chr1-117422120:117422415	chr1	117422120	117422415	chr1	117422120	117422222	chr1-117422152:117422462	chr1	117422152	117422462	chr1
chr1	117422277	117425185	0.028937728937729	-0.216526513960363	0.933551198257081	0.823076923076923	0.124100483108446	0.417209722462608	31	0.22576412257676	HypoLow	*	*	*	InterGenic	*	*	*	*	*	*	*	*	*	*	*	*	*	0	0	chr1:117424835-117425013	chr1	117424835	117425013	chr1	117424835	117425013	chr1-117424845:117425295	chr1	117424845	117425295	chr1	117424845	117425185	chr1-117424966:117425168	chr1	117424966	117425168	chr1
chr1	117731474	117731970	-0.278867102396514	-0.370811069072905	0.0740740740740741	0.5	0.289464243003454	0.668295388030614	8	0.0213077106716282	HypoLow	chr1	117712794	117753445	Intron1	-	VTCN1	protein_coding	chr1	117731474	117731970	1	0.0122014218592409	*	*	*	*	*	0	0	*	*	*	*	*	0	0	chr1-117731900:117732215	chr1	117731900	117732215	chr1	117731900	117731970	chr1-117731780:117732416	chr1	117731780	117732416	chr1
chr1	118341184	118352039	0.0661764705882349	-0.216674140549451	0.96551724137931	0.866666666666667	0.181188147733199	0.468546354076522	38	0.000187666766674259	HypoLow	*	*	*	InterGenic	*	*	*	*	*	*	*	*	*	*	*	*	*	0	0	*	*	*	*	*	0	0	chr1-118348720:118348930	chr1	118348720	118348930	chr1	118348720	118348930	chr1-118351097:118351567	chr1	118351097	118351567	chr1
chr1	118769285	118779063	0.080434782608696	-0.202625756567152	0.96875	0.875	0.137938950101211	0.380022587557286	42	0.000253818014320985	HypoLow	*	*	*	InterGenic	*	*	*	*	*	*	*	*	*	*	*	*	*	0	0	*	*	*	*	*	0	0	chr1-118773720:118773970	chr1	118773720	118773970	chr1	118773720	118773970	chr1-118778219:118778559	chr1	118778219	118778559	chr1
chr1	119385346	119385784	0.154814814814815	0.21040253253764	0.60919540229885	0.414285714285714	0.53811555349326	0.343546354076522	9	0.104895104895105	HypoHigh	*	*	*	InterGenic	*	*	*	*	*	*	*	*	*	*	*	*	*	0	0	*	*	*	*	*	0	0	chr1-119385560:119385710	chr1	119385560	119385710	chr1	119385560	119385710	chr1-119385670:119386105	chr1	119385670	119386105	chr1
chr1	119548785	119551532	0.211981566820276	0.224651109703021	0.40625	0.0952380952380952	0.613575256955041	0.38003855950487	88	2.03502472659974e-09	HyperHigh	*	*	*	InterGenic	*	*	*	*	*	*	*	*	CpG: 176	chr1	119549144	119551320	chr1	119549144	119551320	*	*	*	*	*	0	0	chr1-119551065:119551610	chr1	119551065	119551610	chr1	119551065	119551532	chr1-119551353:119551567	chr1	119551353	119551567	chr1
chr1	121323047	121328824	0.128110859728507	-0.235979854476351	0.96551724137931	0.85	0.166566945236648	0.446263072363596	35	1.65790993492197e-07	HypoLow	chr1	121322323	121323323	Promoter	-	RP11-344P13.1	lincRNA	chr1	121323047	121323323	0.0477756621083607	0.276	*	*	*	*	*	0	0	*	*	*	*	*	0	0	*	*	*	*	*	0	0	*	*	*	*	*
chr1	144300654	144301907	0.290593982630273	-0.284280141845244	0.947368421052632	0.641428571428571	0.182751264900841	0.459472950906775	35	5.26213113319894e-11	HyperLow	*	*	*	InterGenic	*	*	*	*	*	*	*	*	CpG: 43	chr1	144300893	144301482	chr1	144300893	144301482	*	*	*	*	*	0	0	*	*	*	*	*	0	0	*	*	*	*	*
chr1	144480883	144482136	0.280185758513932	-0.308840097552822	0.947368421052632	0.627906976744186	0.182984811475013	0.459472950906775	34	1.06424704468507e-11	HyperLow	chr1	144470245	144520773	Intron1	-	RP11-640M9.1	antisense	chr1	144480883	144482136	1	0.0247981317289424	CpG: 43	chr1	144481122	144481711	chr1	144481122	144481711	*	*	*	*	*	0	0	*	*	*	*	*	0	0	*	*	*	*	*
chr1	144707788	144708287	0.189473684210526	-0.311103637228326	0.962962962962963	0.6	0.272229696105007	0.596643025103333	8	0.00716238345574619	HypoLow	*	*	*	InterGenic	*	*	*	*	*	*	*	*	*	*	*	*	*	0	0	*	*	*	*	*	0	0	chr1-144707765:144707935	chr1	144707765	144707935	chr1	144707788	144707935	chr1-144707843:144708339	chr1	144707843	144708339	chr1
chr1	145540184	145546306	0.076923076923077	-0.206744828417768	0.964285714285714	0.866666666666667	0.15633186452976	0.328808909576947	42	6.32831292485546e-05	HypoLow	chr1	145539797	145541440	Intron27	+	ITGA10	protein_coding	chr1	145540184	145541440	0.20516171185887	0.764455264759586	*	*	*	*	*	0	0	*	*	*	*	*	0	0	chr1-145541320:145541615	chr1	145541320	145541615	chr1	145541320	145541440	chr1-145541367:145541613	chr1	145541367	145541613	chr1
chr1	145540184	145546306	0.076923076923077	-0.206744828417768	0.964285714285714	0.866666666666667	0.15633186452976	0.328808909576947	42	6.32831292485546e-05	HypoLow	chr1	145541441	145541536	Exon28	+	ITGA10	protein_coding	chr1	145541441	145541536	0.0155178046390069	1	*	*	*	*	*	0	0	*	*	*	*	*	0	0	chr1-145541320:145541615	chr1	145541320	145541615	chr1	145541441	145541536	chr1-145541367:145541613	chr1	145541367	145541613	chr1
chr1	145540184	145546306	0.076923076923077	-0.206744828417768	0.964285714285714	0.866666666666667	0.15633186452976	0.328808909576947	42	6.32831292485546e-05	HypoLow	chr1	145541537	145541801	Intron28	+	ITGA10	protein_coding	chr1	145541537	145541801	0.0431231623652401	1	*	*	*	*	*	0	0	*	*	*	*	*	0	0	chr1-145541725:145541975	chr1	145541725	145541975	chr1	145541725	145541801	chr1-145541367:145541613	chr1	145541367	145541613	chr1
chr1	145540184	145546306	0.076923076923077	-0.206744828417768	0.964285714285714	0.866666666666667	0.15633186452976	0.328808909576947	42	6.32831292485546e-05	HypoLow	chr1	145541802	145541915	Exon29	+	ITGA10	protein_coding	chr1	145541802	145541915	0.0184580202548187	1	*	*	*	*	*	0	0	*	*	*	*	*	0	0	chr1-145541725:145541975	chr1	145541725	145541975	chr1	145541802	145541915	chr1-145541907:145542407	chr1	145541907	145542407	chr1
chr1	145540184	145546306	0.076923076923077	-0.206744828417768	0.964285714285714	0.866666666666667	0.15633186452976	0.328808909576947	42	6.32831292485546e-05	HypoLow	chr1	145541916	145542212	Intron29	+	ITGA10	protein_coding	chr1	145541916	145542212	0.0483502123489056	1	*	*	*	*	*	0	0	*	*	*	*	*	0	0	chr1-145542060:145542615	chr1	145542060	145542615	chr1	145542060	145542212	chr1-145542102:145542314	chr1	145542102	145542314	chr1
chr1	145540184	145546306	0.076923076923077	-0.206744828417768	0.964285714285714	0.866666666666667	0.15633186452976	0.328808909576947	42	6.32831292485546e-05	HypoLow	chr1	145542213	145543868	LastExon	+	ITGA10	protein_coding	chr1	145542213	145543868	0.270336491342698	1	*	*	*	*	*	0	0	*	*	*	*	*	0	0	chr1-145543425:145543970	chr1	145543425	145543970	chr1	145543425	145543868	chr1-145543814:145544318	chr1	145543814	145544318	chr1
chr1	145540184	145546306	0.076923076923077	-0.206744828417768	0.964285714285714	0.866666666666667	0.15633186452976	0.328808909576947	42	6.32831292485546e-05	HypoLow	chr1	145541593	145541906	LastExon	-	RP11-315I20.3	antisense	chr1	145541593	145541906	0.0511270826527279	1	*	*	*	*	*	0	0	*	*	*	*	*	0	0	chr1-145541725:145541975	chr1	145541725	145541975	chr1	145541725	145541906	chr1-145541367:145541613	chr1	145541367	145541613	chr1
chr1	145540184	145546306	0.076923076923077	-0.206744828417768	0.964285714285714	0.866666666666667	0.15633186452976	0.328808909576947	42	6.32831292485546e-05	HypoLow	chr1	145541907	145542135	Intron1	-	RP11-315I20.3	antisense	chr1	145541907	145542135	0.0372427311336165	1	*	*	*	*	*	0	0	*	*	*	*	*	0	0	chr1-145542060:145542615	chr1	145542060	145542615	chr1	145542060	145542135	chr1-145542102:145542314	chr1	145542102	145542314	chr1
chr1	145540184	145546306	0.076923076923077	-0.206744828417768	0.964285714285714	0.866666666666667	0.15633186452976	0.328808909576947	42	6.32831292485546e-05	HypoLow	chr1	145542136	145542229	FirstExon	-	RP11-315I20.3	antisense	chr1	145542136	145542229	0.0151911140150278	1	*	*	*	*	*	0	0	*	*	*	*	*	0	0	chr1-145542060:145542615	chr1	145542060	145542615	chr1	145542136	145542229	chr1-145542217:145543218	chr1	145542217	145543218	chr1
chr1	145540184	145546306	0.076923076923077	-0.206744828417768	0.964285714285714	0.866666666666667	0.15633186452976	0.328808909576947	42	6.32831292485546e-05	HypoLow	chr1	145542230	145543230	Promoter	-	RP11-315I20.3	antisense	chr1	145542230	145543230	0.163345311989546	1	*	*	*	*	*	0	0	*	*	*	*	*	0	0	chr1-145542665:145543155	chr1	145542665	145543155	chr1	145542665	145543155	chr1-145543129:145543525	chr1	145543129	145543525	chr1
chr1	145827314	145830473	0.0904713804713805	-0.293844821523283	0.959166666666667	0.829710144927536	0.148868887684743	0.393339964603719	27	0.00105904592861495	HypoLow	chr1	145827074	145828074	Promoter	-	GPR89A	protein_coding	chr1	145827314	145828074	0.240582462804685	0.76	*	*	*	*	*	0	0	*	*	*	*	*	0	0	chr1-145828000:145828150	chr1	145828000	145828150	chr1	145828000	145828074	chr1-145827889:145828322	chr1	145827889	145828322	chr1
chr1	145827314	145830473	0.0904713804713805	-0.293844821523283	0.959166666666667	0.829710144927536	0.148868887684743	0.393339964603719	27	0.00105904592861495	HypoLow	chr1	145827243	145833024	Intron1	+	WI2-925H4.1	antisense	chr1	145827314	145830473	1	0.546445251686559	*	*	*	*	*	0	0	*	*	*	*	*	0	0	chr1-145828000:145828150	chr1	145828000	145828150	chr1	145828000	145828150	chr1-145829119:145829320	chr1	145829119	145829320	chr1
chr1	145979076	145980033	0.110765815760266	0.230768791130738	0.150471698113207	0.0404081632653061	0.468424635321433	0.1982162480067	33	4.28554906042926e-05	HypoHigh	*	*	*	InterGenic	*	*	*	*	*	*	*	*	CpG: 60	chr1	145979221	145979979	chr1	145979221	145979979	*	*	*	*	*	0	0	*	*	*	*	*	0	0	*	*	*	*	*
chr1	145980061	145980538	0.168073384681215	-0.233412295144878	0.775225225225226	0.567850637522769	0.467300375486412	0.772652793886671	13	0.020489202546007	HypoLow	*	*	*	InterGenic	*	*	*	*	*	*	*	*	*	*	*	*	*	0	0	*	*	*	*	*	0	0	*	*	*	*	*	0	0	*	*	*	*	*
chr1	146544192	146545740	0.129761904761905	0.206429018212304	0.281746031746032	0.0769230769230769	0.420223776866263	0.228658419422619	31	0.0120281395635406	HypoHigh	*	*	*	InterGenic	*	*	*	*	*	*	*	*	CpG: 37	chr1	146543987	146544439	chr1	146544192	146544439	*	*	*	*	*	0	0	chr1-146545385:146545635	chr1	146545385	146545635	chr1	146545385	146545635	chr1-146544745:146544985	chr1	146544745	146544985	chr1
chr1	146650273	146660767	0.052631578947368	-0.233168995979367	1	0.91304347826087	0.123744108880292	0.288618872485741	69	6.04624855204845e-09	HypoLow	chr1	146646165	146674898	Intron2	+	RP11-337C18.8	antisense	chr1	146650273	146660767	1	0.365224654578359	*	*	*	*	*	0	0	*	*	*	*	*	0	0	chr1-146657025:146657435	chr1	146657025	146657435	chr1	146657025	146657435	chr1-146660640:146661304	chr1	146660640	146661304	chr1
chr1	146650273	146660767	0.052631578947368	-0.233168995979367	1	0.91304347826087	0.123744108880292	0.288618872485741	69	6.04624855204845e-09	HypoLow	chr1	146646165	146724277	Intron2	+	RP11-337C18.10	processed_transcript	chr1	146650273	146660767	1	0.134345555100369	*	*	*	*	*	0	0	*	*	*	*	*	0	0	chr1-146657025:146657435	chr1	146657025	146657435	chr1	146657025	146657435	chr1-146660640:146661304	chr1	146660640	146661304	chr1
chr1	146650273	146660767	0.052631578947368	-0.233168995979367	1	0.91304347826087	0.123744108880292	0.288618872485741	69	6.04624855204845e-09	HypoLow	chr1	146655884	146656209	LastExon	-	FMO5	protein_coding	chr1	146655884	146656209	0.0309700781398895	1	*	*	*	*	*	0	0	*	*	*	*	*	0	0	*	*	*	*	*	0	0	chr1-146655365:146655947	chr1	146655365	146655947	chr1
chr1	146650273	146660767	0.052631578947368	-0.233168995979367	1	0.91304347826087	0.123744108880292	0.288618872485741	69	6.04624855204845e-09	HypoLow	chr1	146656210	146661755	Intron8	-	FMO5	protein_coding	chr1	146656210	146660767	0.434248141795312	0.821821460775473	*	*	*	*	*	0	0	*	*	*	*	*	0	0	chr1-146657025:146657435	chr1	146657025	146657435	chr1	146657025	146657435	chr1-146660640:146661304	chr1	146660640	146661304	chr1
chr1	146919623	146921711	-0.1	0.301506588766008	0.894736842105263	0.933333333333333	0.567606510371594	0.287706856188877	14	0.0281689996397288	HypoHigh	*	*	*	InterGenic	*	*	*	*	*	*	*	*	*	*	*	*	*	0	0	*	*	*	*	*	0	0	*	*	*	*	*	0	0	chr1-146919518:146919943	chr1	146919518	146919943	chr1
chr1	147055265	147058618	-0.048809523809524	0.246933427480482	0.939338235294118	1	0.401729878976132	0.181188147733199	37	0.00319007828501498	HypoHigh	chr1	147013445	147076569	Intron1	+	BCL9	protein_coding	chr1	147055265	147058618	1	0.0531176731512578	*	*	*	*	*	0	0	*	*	*	*	*	0	0	chr1-147058180:147058535	chr1	147058180	147058535	chr1	147058180	147058535	chr1-147058292:147058532	chr1	147058292	147058532	chr1
chr1	147718064	147719038	0.17670011148272	-0.284857198449836	0.940178571428572	0.732093023255814	0.348003642419132	0.6749397904668	35	5.8766423674658e-07	HypoLow	*	*	*	InterGenic	*	*	*	*	*	*	*	*	CpG: 59	chr1	147718156	147718915	chr1	147718156	147718915	*	*	*	*	*	0	0	chr1-147718545:147719495	chr1	147718545	147719495	chr1	147718545	147719038	chr1-147718925:147719088	chr1	147718925	147719088	chr1
chr1	147774723	147775075	0.322981366459627	-0.016131062111454	0.833333333333333	0.454545454545455	0.579422976025488	0.540852082972755	14	0.000780698929087526	HyperHigh	*	*	*	InterGenic	*	*	*	*	*	*	*	*	*	*	*	*	*	0	0	*	*	*	*	*	0	0	*	*	*	*	*	0	0	*	*	*	*	*
chr1	147833268	147833515	0.309210526315789	0.0310180829206885	0.729202037351443	0.315384615384615	0.564552780836419	0.516264980231799	11	0.00893069778518695	HyperHigh	*	*	*	InterGenic	*	*	*	*	*	*	*	*	*	*	*	*	*	0	0	*	*	*	*	*	0	0	*	*	*	*	*	0	0	*	*	*	*	*
chr1	149155859	149157150	0.215030820293978	0.137062562260621	0.441558441558442	0.196774193548387	0.675083062802598	0.538912672275246	41	8.37054306407546e-06	HyperHigh	*	*	*	InterGenic	*	*	*	*	*	*	*	*	CpG: 46	chr1	149156106	149156671	chr1	149156106	149156671	*	*	*	*	*	0	0	chr1-149156445:149156755	chr1	149156445	149156755	chr1	149156445	149156755	chr1-149156336:149156773	chr1	149156336	149156773	chr1
chr1	149615356	149616588	0.292287882895093	-0.282845482806784	0.9375	0.637218045112782	0.170969618218764	0.516409610340819	35	4.83782544350774e-11	HyperLow	chr1	149605868	149632455	Intron1	+	RP11-353N4.8	processed_transcript	chr1	149615356	149616588	1	0.0463384360777824	CpG: 43	chr1	149615818	149616407	chr1	149615818	149616407	*	*	*	*	*	0	0	*	*	*	*	*	0	0	*	*	*	*	*
chr1	149824391	149825164	0.143330724751098	0.208968207139169	0.185060975609756	0.0274024024024024	0.326739127561601	0.0874639427446403	27	3.9561943186822e-07	HypoHigh	chr1	149824181	149825836	FirstExon	+	HIST2H3A	protein_coding	chr1	149824391	149825164	1	0.467069486404834	CpG: 288	chr1	149821901	149825191	chr1	149824391	149825164	*	*	*	*	*	0	0	*	*	*	*	*	0	0	*	*	*	*	*
chr1	149860416	149861068	0.138277511961722	-0.223612129763721	0.935416666666667	0.761111111111111	0.267473761276455	0.5303714531523	17	0.0474859307010202	HypoLow	chr1	149859467	149860467	Promoter	-	HIST2H2AB	protein_coding	chr1	149860416	149860467	0.0782208588957055	0.051	*	*	*	*	*	0	0	*	*	*	*	*	0	0	chr1-149860300:149860775	chr1	149860300	149860775	chr1	149860416	149860467	chr1-149860384:149860774	chr1	149860384	149860774	chr1
chr1	149860416	149861068	0.138277511961722	-0.223612129763721	0.935416666666667	0.761111111111111	0.267473761276455	0.5303714531523	17	0.0474859307010202	HypoLow	chr1	149859674	149871012	Intron1	+	BOLA1	protein_coding	chr1	149860416	149861068	1	0.057505732933498	*	*	*	*	*	0	0	*	*	*	*	*	0	0	chr1-149860780:149860875	chr1	149860780	149860875	chr1	149860780	149860875	chr1-149860917:149861297	chr1	149860917	149861297	chr1
chr1	151297615	151298779	0.111846405228758	-0.255534369891082	0.955	0.811764705882353	0.197224259527442	0.423056374310818	15	0.00377461501679609	HypoLow	chr1	151288986	151299746	Intron1	-	PI4KB	protein_coding	chr1	151297615	151298779	1	0.10817843866171	*	*	*	*	*	0	0	*	*	*	*	*	0	0	chr1-151297760:151298975	chr1	151297760	151298975	chr1	151297760	151298779	chr1-151298741:151299371	chr1	151298741	151299371	chr1
chr1	151433771	151437115	0.075992731188585	-0.222987357344957	0.961481481481481	0.858552631578948	0.181511480181641	0.457098559440255	33	0.00123485625652107	HypoLow	*	*	*	InterGenic	*	*	*	*	*	*	*	*	*	*	*	*	*	0	0	*	*	*	*	*	0	0	chr1-151436585:151436830	chr1	151436585	151436830	chr1	151436585	151436830	chr1-151436577:151436847	chr1	151436577	151436847	chr1
chr1	151814911	151818747	0.097402597402598	-0.203016331206507	1	0.857142857142857	0.0991574163064299	0.330421420178476	40	7.8084049394758e-07	HypoLow	chr1	151814508	151816520	Intron1	+	AL450992.2	antisense	chr1	151814911	151816520	0.419447340980188	0.799701789264413	*	*	*	*	*	0	0	*	*	*	*	*	0	0	chr1-151816000:151816155	chr1	151816000	151816155	chr1	151816000	151816155	chr1-151816065:151816205	chr1	151816065	151816205	chr1
chr1	151814911	151818747	0.097402597402598	-0.203016331206507	1	0.857142857142857	0.0991574163064299	0.330421420178476	40	7.8084049394758e-07	HypoLow	chr1	151816521	151816718	Exon2	+	AL450992.2	antisense	chr1	151816521	151816718	0.0513555787278415	1	*	*	*	*	*	0	0	*	*	*	*	*	0	0	*	*	*	*	*	0	0	*	*	*	*	*
chr1	151814911	151818747	0.097402597402598	-0.203016331206507	1	0.857142857142857	0.0991574163064299	0.330421420178476	40	7.8084049394758e-07	HypoLow	chr1	151816719	151822708	Intron2	+	AL450992.2	antisense	chr1	151816719	151818747	0.528675703858186	0.338620804808816	*	*	*	*	*	0	0	*	*	*	*	*	0	0	chr1-151818620:151819035	chr1	151818620	151819035	chr1	151818620	151818747	chr1-151818740:151819020	chr1	151818740	151819020	chr1
chr1	152006878	152008465	0.0833333333333333	0.236883323476076	0.117647058823529	0.0357142857142857	0.459594497828725	0.130414521209752	20	0.00985330093355705	HypoHigh	chr1	151994986	152014060	Intron12	+	NBPF18P	antisense	chr1	152006878	152008465	1	0.0832022648631645	*	*	*	*	*	0	0	chr1:152007615-152008057	chr1	152007615	152008057	chr1	152007615	152008057	chr1-152008320:152008590	chr1	152008320	152008590	chr1	152008320	152008465	chr1-152008417:152008907	chr1	152008417	152008907	chr1
chr1	152006878	152008465	0.0833333333333333	0.236883323476076	0.117647058823529	0.0357142857142857	0.459594497828725	0.130414521209752	20	0.00985330093355705	HypoHigh	chr1	152006277	152020297	Intron1	-	S100A11	protein_coding	chr1	152006878	152008465	1	0.113195435092725	*	*	*	*	*	0	0	chr1:152007615-152008057	chr1	152007615	152008057	chr1	152007615	152008057	chr1-152008320:152008590	chr1	152008320	152008590	chr1	152008320	152008465	chr1-152008417:152008907	chr1	152008417	152008907	chr1
chr1	152079490	152082398	0.212002192181221	-0.11532887789062	0.803846153846154	0.477225672877847	0.477821945842975	0.594138542895384	91	4.71639981716667e-07	HyperLow	chr1	152078793	152085554	LastExon	-	TCHH	protein_coding	chr1	152079490	152082398	1	0.430113888478036	CpG: 131	chr1	152079997	152081705	chr1	152079997	152081705	*	*	*	*	*	0	0	chr1-152081425:152082395	chr1	152081425	152082395	chr1	152081425	152082395	chr1-152082397:152083015	chr1	152082397	152083015	chr1
chr1	153334633	153339404	0.086111111111111	-0.206886075325171	0.933035714285715	0.834096109839817	0.27318082766369	0.42154043403449	41	7.66625801436183e-05	HypoLow	*	*	*	InterGenic	*	*	*	*	*	*	*	*	*	*	*	*	*	0	0	chr1:153337774-153338142	chr1	153337774	153338142	chr1	153337774	153338142	chr1-153339045:153339275	chr1	153339045	153339275	chr1	153339045	153339275	chr1-153337928:153338099	chr1	153337928	153338099	chr1
chr1	153464709	153466704	0.1044061302682	-0.252110494128648	0.932183908045977	0.837719298245614	0.309765912794154	0.486382639009082	19	0.00289538146530872	HypoLow	*	*	*	InterGenic	*	*	*	*	*	*	*	*	*	*	*	*	*	0	0	*	*	*	*	*	0	0	chr1-153465900:153466475	chr1	153465900	153466475	chr1	153465900	153466475	chr1-153466180:153466610	chr1	153466180	153466610	chr1
chr1	153853405	153854547	0.421052631578947	0.066666666666667	0.736842105263158	0.3125	0.468546354076522	0.552580908834963	16	5.65031996559021e-05	HyperHigh	chr1	153800825	153895208	Intron1	-	GATAD2B	protein_coding	chr1	153853405	153854547	1	0.0120996365870973	*	*	*	*	*	0	0	chr1:153853385-153853782	chr1	153853385	153853782	chr1	153853405	153853782	chr1-153854260:153854750	chr1	153854260	153854750	chr1	153854260	153854547	chr1-153854444:153854854	chr1	153854444	153854854	chr1
chr1	154162502	154167436	0.0949155011655015	-0.270426041486378	0.916666666666667	0.752525252525252	0.257634674316434	0.493191319504541	33	0.00238802677706341	HypoLow	chr1	154148725	154163661	Intron2	-	TPM3	protein_coding	chr1	154162502	154163661	0.234900689096068	0.077597750401714	*	*	*	*	*	0	0	*	*	*	*	*	0	0	chr1-154163085:154163350	chr1	154163085	154163350	chr1	154163085	154163350	chr1-154163569:154163979	chr1	154163569	154163979	chr1
chr1	154162502	154167436	0.0949155011655015	-0.270426041486378	0.916666666666667	0.752525252525252	0.257634674316434	0.493191319504541	33	0.00238802677706341	HypoLow	chr1	154163662	154163787	Exon2	-	TPM3	protein_coding	chr1	154163662	154163787	0.0253344142683421	1	*	*	*	*	*	0	0	*	*	*	*	*	0	0	chr1-154163665:154163815	chr1	154163665	154163815	chr1	154163665	154163787	chr1-154163569:154163979	chr1	154163569	154163979	chr1
chr1	154162502	154167436	0.0949155011655015	-0.270426041486378	0.916666666666667	0.752525252525252	0.257634674316434	0.493191319504541	33	0.00238802677706341	HypoLow	chr1	154163788	154164377	Intron1	-	TPM3	protein_coding	chr1	154163788	154164377	0.119375760032428	1	*	*	*	*	*	0	0	*	*	*	*	*	0	0	chr1-154164225:154164375	chr1	154164225	154164375	chr1	154164225	154164375	chr1-154164300:154164983	chr1	154164300	154164983	chr1
chr1	154162502	154167436	0.0949155011655015	-0.270426041486378	0.916666666666667	0.752525252525252	0.257634674316434	0.493191319504541	33	0.00238802677706341	HypoLow	chr1	154164378	154164534	FirstExon	-	TPM3	protein_coding	chr1	154164378	154164534	0.031617349006891	1	*	*	*	*	*	0	0	*	*	*	*	*	0	0	chr1-154164465:154164990	chr1	154164465	154164990	chr1	154164465	154164534	chr1-154164504:154164940	chr1	154164504	154164940	chr1
chr1	154162502	154167436	0.0949155011655015	-0.270426041486378	0.916666666666667	0.752525252525252	0.257634674316434	0.493191319504541	33	0.00238802677706341	HypoLow	chr1	154164535	154165535	Promoter	-	TPM3	protein_coding	chr1	154164535	154165535	0.202675314146737	1	*	*	*	*	*	0	0	*	*	*	*	*	0	0	chr1-154165020:154165270	chr1	154165020	154165270	chr1	154165020	154165270	chr1-154164756:154164990	chr1	154164756	154164990	chr1
chr1	154373442	154375088	0.133333333333333	-0.290184385157739	0.91304347826087	0.818181818181818	0.216674140549451	0.583333333333333	16	0.00932483905412887	HypoLow	chr1	154374804	154376433	LastExon	-	RP11-350G8.5	antisense	chr1	154374804	154375088	0.172539489671932	0.174340085942296	*	*	*	*	*	0	0	*	*	*	*	*	0	0	chr1-154375005:154375155	chr1	154375005	154375155	chr1	154375005	154375088	chr1-154375002:154375432	chr1	154375002	154375432	chr1
chr1	154754894	154763441	0.120512820512821	-0.207416576002523	0.96969696969697	0.846153846153846	0.15633186452976	0.417209722462608	98	6.59228387747404e-13	HypoLow	chr1	154744870	154794564	Intron2	-	KCNN3	protein_coding	chr1	154754894	154763441	1	0.171992594679438	*	*	*	*	*	0	0	chr1:154760803-154761111	chr1	154760803	154761111	chr1	154760803	154761111	chr1-154761805:154761955	chr1	154761805	154761955	chr1	154761805	154761955	chr1-154759301:154759621	chr1	154759301	154759621	chr1
chr1	155155575	155160240	0.0575	-0.240309390935439	0.944444444444444	0.875	0.181188147733199	0.44148676443388	74	1.60398627062469e-05	HypoLow	chr1	155145951	155159700	Intron1	-	RP11-201K10.3	protein_coding	chr1	155155575	155159700	0.884244372990354	0.30002181976871	*	*	*	*	*	0	0	*	*	*	*	*	0	0	chr1-155159445:155159735	chr1	155159445	155159735	chr1	155159445	155159700	chr1-155159564:155159994	chr1	155159564	155159994	chr1
chr1	155155575	155160240	0.0575	-0.240309390935439	0.944444444444444	0.875	0.181188147733199	0.44148676443388	74	1.60398627062469e-05	HypoLow	chr1	155159701	155159748	FirstExon	-	RP11-201K10.3	protein_coding	chr1	155159701	155159748	0.010075026795284	1	*	*	*	*	*	0	0	*	*	*	*	*	0	0	chr1-155159445:155159735	chr1	155159445	155159735	chr1	155159701	155159735	chr1-155159564:155159994	chr1	155159564	155159994	chr1
chr1	155155575	155160240	0.0575	-0.240309390935439	0.944444444444444	0.875	0.181188147733199	0.44148676443388	74	1.60398627062469e-05	HypoLow	chr1	155159749	155160749	Promoter	-	RP11-201K10.3	protein_coding	chr1	155159749	155160240	0.105251875669882	0.491	*	*	*	*	*	0	0	*	*	*	*	*	0	0	chr1-155159885:155160195	chr1	155159885	155160195	chr1	155159885	155160195	chr1-155159564:155159994	chr1	155159564	155159994	chr1
chr1	155155575	155160240	0.0575	-0.240309390935439	0.944444444444444	0.875	0.181188147733199	0.44148676443388	74	1.60398627062469e-05	HypoLow	chr1	155154626	155156272	Intron9	+	TRIM46	protein_coding	chr1	155155575	155156272	0.14941050375134	0.423450789793439	*	*	*	*	*	0	0	*	*	*	*	*	0	0	chr1-155156260:155156515	chr1	155156260	155156515	chr1	155156260	155156272	chr1-155156249:155156733	chr1	155156249	155156733	chr1
chr1	155155575	155160240	0.0575	-0.240309390935439	0.944444444444444	0.875	0.181188147733199	0.44148676443388	74	1.60398627062469e-05	HypoLow	chr1	155156273	155157445	LastExon	+	TRIM46	protein_coding	chr1	155156273	155157445	0.25123258306538	1	*	*	*	*	*	0	0	*	*	*	*	*	0	0	chr1-155157400:155157795	chr1	155157400	155157795	chr1	155157400	155157445	chr1-155157360:155158375	chr1	155157360	155158375	chr1
chr1	155155575	155160240	0.0575	-0.240309390935439	0.944444444444444	0.875	0.181188147733199	0.44148676443388	74	1.60398627062469e-05	HypoLow	chr1	155158300	155158685	LastExon	-	MUC1	protein_coding	chr1	155158300	155158685	0.082529474812433	1	*	*	*	*	*	0	0	*	*	*	*	*	0	0	chr1-155158485:155159355	chr1	155158485	155159355	chr1	155158485	155158685	chr1-155158642:155158952	chr1	155158642	155158952	chr1
chr1	155155575	155160240	0.0575	-0.240309390935439	0.944444444444444	0.875	0.181188147733199	0.44148676443388	74	1.60398627062469e-05	HypoLow	chr1	155158686	155159700	Intron7	-	MUC1	protein_coding	chr1	155158686	155159700	0.217363344051447	1	*	*	*	*	*	0	0	*	*	*	*	*	0	0	chr1-155159445:155159735	chr1	155159445	155159735	chr1	155159445	155159700	chr1-155159564:155159994	chr1	155159564	155159994	chr1
chr1	155155575	155160240	0.0575	-0.240309390935439	0.944444444444444	0.875	0.181188147733199	0.44148676443388	74	1.60398627062469e-05	HypoLow	chr1	155159701	155159850	Exon7	-	MUC1	protein_coding	chr1	155159701	155159850	0.0319399785637728	1	*	*	*	*	*	0	0	*	*	*	*	*	0	0	chr1-155159825:155159855	chr1	155159825	155159855	chr1	155159825	155159850	chr1-155159564:155159994	chr1	155159564	155159994	chr1
chr1	155155575	155160240	0.0575	-0.240309390935439	0.944444444444444	0.875	0.181188147733199	0.44148676443388	74	1.60398627062469e-05	HypoLow	chr1	155159851	155159930	Intron6	-	MUC1	protein_coding	chr1	155159851	155159930	0.0169346195069668	1	*	*	*	*	*	0	0	*	*	*	*	*	0	0	chr1-155159885:155160195	chr1	155159885	155160195	chr1	155159885	155159930	chr1-155159564:155159994	chr1	155159564	155159994	chr1
chr1	155155575	155160240	0.0575	-0.240309390935439	0.944444444444444	0.875	0.181188147733199	0.44148676443388	74	1.60398627062469e-05	HypoLow	chr1	155159931	155160052	Exon6	-	MUC1	protein_coding	chr1	155159931	155160052	0.0259378349410504	1	*	*	*	*	*	0	0	*	*	*	*	*	0	0	chr1-155159885:155160195	chr1	155159885	155160195	chr1	155159931	155160052	chr1-155159564:155159994	chr1	155159564	155159994	chr1
chr1	155155575	155160240	0.0575	-0.240309390935439	0.944444444444444	0.875	0.181188147733199	0.44148676443388	74	1.60398627062469e-05	HypoLow	chr1	155160053	155160197	Intron5	-	MUC1	protein_coding	chr1	155160053	155160197	0.0308681672025723	1	*	*	*	*	*	0	0	*	*	*	*	*	0	0	chr1-155159885:155160195	chr1	155159885	155160195	chr1	155160053	155160195	chr1-155159024:155161187	chr1	155159024	155161187	chr1
chr1	155155575	155160240	0.0575	-0.240309390935439	0.944444444444444	0.875	0.181188147733199	0.44148676443388	74	1.60398627062469e-05	HypoLow	chr1	155160198	155160334	Exon5	-	MUC1	protein_coding	chr1	155160198	155160240	0.0090032154340836	0.308823529411765	*	*	*	*	*	0	0	*	*	*	*	*	0	0	*	*	*	*	*	0	0	chr1-155159024:155161187	chr1	155159024	155161187	chr1
chr1	155295191	155295368	0.223076923076923	-0.329772656947042	0.8	0.5	0.353759374819711	0.718546354076522	10	0.111776299358967	HyperLow	chr1	155295107	155295281	Exon5	+	RUSC1	protein_coding	chr1	155295191	155295281	0.508474576271186	0.517241379310345	CpG: 221	chr1	155292469	155295433	chr1	155295191	155295281	*	*	*	*	*	0	0	chr1-155295225:155295415	chr1	155295225	155295415	chr1	155295225	155295281	chr1-155295063:155295627	chr1	155295063	155295627	chr1
chr1	155295191	155295368	0.223076923076923	-0.329772656947042	0.8	0.5	0.353759374819711	0.718546354076522	10	0.111776299358967	HyperLow	chr1	155295282	155295357	Intron5	+	RUSC1	protein_coding	chr1	155295282	155295357	0.423728813559322	1	CpG: 221	chr1	155292469	155295433	chr1	155295282	155295357	*	*	*	*	*	0	0	chr1-155295225:155295415	chr1	155295225	155295415	chr1	155295282	155295357	chr1-155295063:155295627	chr1	155295063	155295627	chr1
chr1	155295191	155295368	0.223076923076923	-0.329772656947042	0.8	0.5	0.353759374819711	0.718546354076522	10	0.111776299358967	HyperLow	chr1	155295358	155295463	Exon6	+	RUSC1	protein_coding	chr1	155295358	155295368	0.0564971751412429	0.0952380952380952	CpG: 221	chr1	155292469	155295433	chr1	155295358	155295368	*	*	*	*	*	0	0	chr1-155295225:155295415	chr1	155295225	155295415	chr1	155295358	155295368	chr1-155295063:155295627	chr1	155295063	155295627	chr1
chr1	155614687	155616895	0.214285714285714	-0.290099642499846	0.863636363636364	0.684210526315789	0.270426041486378	0.554832593066821	20	0.00106466282444561	HyperLow	*	*	*	InterGenic	*	*	*	*	*	*	*	*	*	*	*	*	*	0	0	*	*	*	*	*	0	0	chr1-155616105:155616535	chr1	155616105	155616535	chr1	155616105	155616535	chr1-155616233:155616409	chr1	155616233	155616409	chr1
chr1	155936559	155938060	0.261904761904762	-0.255349369197253	0.823529411764706	0.45	0.323650198151556	0.618854920710318	28	0.000649210213612252	HyperLow	chr1	155916872	155965885	Intron2	-	ARHGEF2	protein_coding	chr1	155936559	155938060	1	0.0306245281863995	*	*	*	*	*	0	0	*	*	*	*	*	0	0	chr1-155937160:155937955	chr1	155937160	155937955	chr1	155937160	155937955	chr1-155937948:155938041	chr1	155937948	155938041	chr1
chr1	156246791	156247427	0.153846153846154	-0.221787777585469	0.916666666666667	0.8	0.412213580647056	0.554832593066821	10	0.153394206812096	HypoLow	chr1	156244478	156246875	Intron4	-	SMG5	protein_coding	chr1	156246791	156246875	0.132075471698113	0.0350438047559449	*	*	*	*	*	0	0	*	*	*	*	*	0	0	*	*	*	*	*	0	0	chr1-156246872:156247176	chr1	156246872	156247176	chr1
chr1	156246791	156247427	0.153846153846154	-0.221787777585469	0.916666666666667	0.8	0.412213580647056	0.554832593066821	10	0.153394206812096	HypoLow	chr1	156246876	156247032	Exon4	-	SMG5	protein_coding	chr1	156246876	156247032	0.245283018867925	1	*	*	*	*	*	0	0	*	*	*	*	*	0	0	chr1-156246885:156247315	chr1	156246885	156247315	chr1	156246885	156247032	chr1-156246934:156247199	chr1	156246934	156247199	chr1
chr1	156246791	156247427	0.153846153846154	-0.221787777585469	0.916666666666667	0.8	0.412213580647056	0.554832593066821	10	0.153394206812096	HypoLow	chr1	156247033	156247715	Intron3	-	SMG5	protein_coding	chr1	156247033	156247427	0.619496855345912	0.577712609970675	*	*	*	*	*	0	0	*	*	*	*	*	0	0	chr1-156246885:156247315	chr1	156246885	156247315	chr1	156247033	156247315	chr1-156246934:156247199	chr1	156246934	156247199	chr1
chr1	156399076	156399424	0.272167487684729	0.333333333333333	0.291666666666667	0	0.584238426326568	0	8	0.0140470283674153	HyperHigh	chr1	156396665	156399167	Intron1	-	C1orf61	protein_coding	chr1	156399076	156399167	0.261494252873563	0.0363709032773781	*	*	*	*	*	0	0	*	*	*	*	*	0	0	chr1-156399045:156399370	chr1	156399045	156399370	chr1	156399076	156399167	chr1-156399087:156399497	chr1	156399087	156399497	chr1
chr1	156399076	156399424	0.272167487684729	0.333333333333333	0.291666666666667	0	0.584238426326568	0	8	0.0140470283674153	HyperHigh	chr1	156399168	156399184	FirstExon	-	C1orf61	protein_coding	chr1	156399168	156399184	0.0459770114942529	1	*	*	*	*	*	0	0	*	*	*	*	*	0	0	chr1-156399045:156399370	chr1	156399045	156399370	chr1	156399168	156399184	chr1-156399087:156399497	chr1	156399087	156399497	chr1
chr1	156399076	156399424	0.272167487684729	0.333333333333333	0.291666666666667	0	0.584238426326568	0	8	0.0140470283674153	HyperHigh	chr1	156399185	156400185	Promoter	-	C1orf61	protein_coding	chr1	156399185	156399424	0.686781609195402	0.239	*	*	*	*	*	0	0	*	*	*	*	*	0	0	chr1-156399405:156399955	chr1	156399405	156399955	chr1	156399405	156399424	chr1-156399408:156399852	chr1	156399408	156399852	chr1
chr1	156616687	156617106	0.329593267882188	-0.166773505653949	0.764705882352941	0.318181818181818	0.458426455179793	0.522772751900948	14	0.0354410126671707	HyperLow	chr1	156616593	156616967	Exon3	+	BCAN	protein_coding	chr1	156616687	156616967	0.668257756563246	0.748663101604278	CpG: 50	chr1	156616553	156616946	chr1	156616687	156616946	*	*	*	*	*	0	0	chr1-156616525:156616910	chr1	156616525	156616910	chr1	156616687	156616910	chr1-156616747:156617131	chr1	156616747	156617131	chr1
chr1	156616687	156617106	0.329593267882188	-0.166773505653949	0.764705882352941	0.318181818181818	0.458426455179793	0.522772751900948	14	0.0354410126671707	HyperLow	chr1	156616968	156617299	Intron3	+	BCAN	protein_coding	chr1	156616968	156617106	0.329355608591885	0.416918429003021	*	*	*	*	*	0	0	*	*	*	*	*	0	0	chr1-156617005:156617195	chr1	156617005	156617195	chr1	156617005	156617106	chr1-156616747:156617131	chr1	156616747	156617131	chr1
chr1	156616687	156617106	0.329593267882188	-0.166773505653949	0.764705882352941	0.318181818181818	0.458426455179793	0.522772751900948	14	0.0354410126671707	HyperLow	chr1	156616299	156616946	LastExon	-	RP11-284F21.7	antisense	chr1	156616687	156616946	0.618138424821002	0.400309119010819	CpG: 50	chr1	156616553	156616946	chr1	156616687	156616946	*	*	*	*	*	0	0	chr1-156616525:156616910	chr1	156616525	156616910	chr1	156616687	156616910	chr1-156616747:156617131	chr1	156616747	156617131	chr1
chr1	156616687	156617106	0.329593267882188	-0.166773505653949	0.764705882352941	0.318181818181818	0.458426455179793	0.522772751900948	14	0.0354410126671707	HyperLow	chr1	156616947	156631106	Intron1	-	RP11-284F21.7	antisense	chr1	156616947	156617106	0.379474940334129	0.0112296066106363	*	*	*	*	*	0	0	*	*	*	*	*	0	0	chr1-156617005:156617195	chr1	156617005	156617195	chr1	156617005	156617106	chr1-156616747:156617131	chr1	156616747	156617131	chr1
chr1	156784110	156785615	0.111111111111111	-0.236021574729409	0.947368421052632	0.80952380952381	0.315220101533547	0.519646177450092	20	0.000617835232701462	HypoLow	chr1	156784087	156784828	Intron3	-	SH2D2A	protein_coding	chr1	156784110	156784828	0.477076411960133	0.968960863697706	*	*	*	*	*	0	0	*	*	*	*	*	0	0	chr1-156784525:156785075	chr1	156784525	156785075	chr1	156784525	156784828	chr1-156784668:156784958	chr1	156784668	156784958	chr1
chr1	156784110	156785615	0.111111111111111	-0.236021574729409	0.947368421052632	0.80952380952381	0.315220101533547	0.519646177450092	20	0.000617835232701462	HypoLow	chr1	156784829	156785013	Exon3	-	SH2D2A	protein_coding	chr1	156784829	156785013	0.122259136212625	1	*	*	*	*	*	0	0	*	*	*	*	*	0	0	chr1-156784525:156785075	chr1	156784525	156785075	chr1	156784829	156785013	chr1-156785008:156785368	chr1	156785008	156785368	chr1
chr1	156784110	156785615	0.111111111111111	-0.236021574729409	0.947368421052632	0.80952380952381	0.315220101533547	0.519646177450092	20	0.000617835232701462	HypoLow	chr1	156785014	156785797	Intron2	-	SH2D2A	protein_coding	chr1	156785014	156785615	0.399335548172757	0.767560664112388	*	*	*	*	*	0	0	*	*	*	*	*	0	0	chr1-156785145:156785615	chr1	156785145	156785615	chr1	156785145	156785615	chr1-156785306:156785428	chr1	156785306	156785428	chr1
chr1	156784110	156785615	0.111111111111111	-0.236021574729409	0.947368421052632	0.80952380952381	0.315220101533547	0.519646177450092	20	0.000617835232701462	HypoLow	chr1	156784447	156785447	Promoter	+	NTRK1	protein_coding	chr1	156784447	156785447	0.664451827242525	1	*	*	*	*	*	0	0	*	*	*	*	*	0	0	chr1-156785145:156785615	chr1	156785145	156785615	chr1	156785145	156785447	chr1-156785306:156785428	chr1	156785306	156785428	chr1
chr1	156784110	156785615	0.111111111111111	-0.236021574729409	0.947368421052632	0.80952380952381	0.315220101533547	0.519646177450092	20	0.000617835232701462	HypoLow	chr1	156785448	156785630	FirstExon	+	NTRK1	protein_coding	chr1	156785448	156785615	0.110963455149502	0.917582417582418	*	*	*	*	*	0	0	*	*	*	*	*	0	0	chr1-156785145:156785615	chr1	156785145	156785615	chr1	156785448	156785615	chr1-156785271:156785519	chr1	156785271	156785519	chr1
chr1	156832829	156833264	-0.266666666666667	-0.126425938624114	0.0869565217391304	0.466666666666667	0.288618872485741	0.333333333333333	10	0.0303387894086966	HypoLow	chr1	156811986	156834145	Intron2	+	NTRK1	protein_coding	chr1	156832829	156833264	1	0.0196308497675888	*	*	*	*	*	0	0	*	*	*	*	*	0	0	chr1-156832820:156833235	chr1	156832820	156833235	chr1	156832829	156833235	chr1-156833196:156833500	chr1	156833196	156833500	chr1
chr1	156854011	156855853	0.110750360750361	-0.247918864512835	0.936507936507937	0.829090909090909	0.297754978792341	0.522292906902759	25	0.00792062346330855	HypoLow	*	*	*	InterGenic	*	*	*	*	*	*	*	*	*	*	*	*	*	0	0	*	*	*	*	*	0	0	chr1-156855105:156855715	chr1	156855105	156855715	chr1	156855105	156855715	chr1-156855767:156856147	chr1	156855767	156856147	chr1
chr1	157067034	157068697	0.119642857142857	-0.211477995138599	1	0.853571428571428	0.18920620363032	0.406317881974493	25	6.78737944206969e-06	HypoLow	chr1	157062920	157067659	Intron4	-	ETV3L	protein_coding	chr1	157067034	157067659	0.375826819001804	0.131884363789829	*	*	*	*	*	0	0	*	*	*	*	*	0	0	chr1-157067640:157067855	chr1	157067640	157067855	chr1	157067640	157067659	*	*	*	*	*
chr1	157067034	157068697	0.119642857142857	-0.211477995138599	1	0.853571428571428	0.18920620363032	0.406317881974493	25	6.78737944206969e-06	HypoLow	chr1	157067660	157067780	Exon4	-	ETV3L	protein_coding	chr1	157067660	157067780	0.0721587492483464	1	*	*	*	*	*	0	0	*	*	*	*	*	0	0	chr1-157067640:157067855	chr1	157067640	157067855	chr1	157067660	157067780	*	*	*	*	*
chr1	157067034	157068697	0.119642857142857	-0.211477995138599	1	0.853571428571428	0.18920620363032	0.406317881974493	25	6.78737944206969e-06	HypoLow	chr1	157067781	157068497	Intron3	-	ETV3L	protein_coding	chr1	157067781	157068497	0.430547203848467	1	*	*	*	*	*	0	0	*	*	*	*	*	0	0	chr1-157068465:157068615	chr1	157068465	157068615	chr1	157068465	157068497	*	*	*	*	*
chr1	157067034	157068697	0.119642857142857	-0.211477995138599	1	0.853571428571428	0.18920620363032	0.406317881974493	25	6.78737944206969e-06	HypoLow	chr1	157068498	157068687	Exon3	-	ETV3L	protein_coding	chr1	157068498	157068687	0.113650030066146	1	*	*	*	*	*	0	0	*	*	*	*	*	0	0	chr1-157068685:157069270	chr1	157068685	157069270	chr1	157068685	157068687	*	*	*	*	*
chr1	157067034	157068697	0.119642857142857	-0.211477995138599	1	0.853571428571428	0.18920620363032	0.406317881974493	25	6.78737944206969e-06	HypoLow	chr1	157068688	157068932	Intron2	-	ETV3L	protein_coding	chr1	157068688	157068697	0.00541190619362598	0.0368852459016393	*	*	*	*	*	0	0	*	*	*	*	*	0	0	chr1-157068685:157069270	chr1	157068685	157069270	chr1	157068688	157068697	*	*	*	*	*
chr1	157164410	157165214	0.209473684210526	-0.122230377309066	0.799407114624506	0.553442028985508	0.491710461180406	0.55725973927632	33	0.00632386098696269	HyperLow	*	*	*	InterGenic	*	*	*	*	*	*	*	*	CpG: 57	chr1	157164538	157165135	chr1	157164538	157165135	*	*	*	*	*	0	0	chr1-157164920:157165495	chr1	157164920	157165495	chr1	157164920	157165214	chr1-157163896:157164698	chr1	157163896	157164698	chr1
chr1	157196252	157196699	-0.328205128205128	0.51481628861422	0.488461538461539	0.961538461538461	0.751144795396262	0.23382515050691	7	0.142368182702515	HypoHigh	*	*	*	InterGenic	*	*	*	*	*	*	*	*	*	*	*	*	*	0	0	*	*	*	*	*	0	0	chr1-157196565:157196870	chr1	157196565	157196870	chr1	157196565	157196699	chr1-157196620:157197040	chr1	157196620	157197040	chr1
chr1	157343459	157344587	-0.099673202614379	0.417001313704183	0.826797385620915	0.942857142857143	0.442148800393083	0	11	0.109026501991292	HypoHigh	*	*	*	InterGenic	*	*	*	*	*	*	*	*	*	*	*	*	*	0	0	*	*	*	*	*	0	0	*	*	*	*	*	0	0	chr1-157343174:157343733	chr1	157343174	157343733	chr1
chr1	157957935	157961860	-0.08974358974359	0.255049481813441	0.833333333333333	0.909090909090909	0.478506834760889	0.270426041486378	26	0.0282697247012013	HypoHigh	*	*	*	InterGenic	*	*	*	*	*	*	*	*	*	*	*	*	*	0	0	*	*	*	*	*	0	0	chr1-157961665:157962395	chr1	157961665	157962395	chr1	157961665	157961860	chr1-157961821:157962284	chr1	157961821	157962284	chr1
chr1	158059602	158060533	-0.166666666666667	0.443418438768345	0.833333333333333	1	0.45698353148489	0	12	0.00620653297429006	HypoHigh	chr1	158059508	158059608	Exon8	+	KIRREL	protein_coding	chr1	158059602	158059608	0.00644468313641246	0.06	*	*	*	*	*	0	0	*	*	*	*	*	0	0	*	*	*	*	*	0	0	*	*	*	*	*
chr1	158059602	158060533	-0.166666666666667	0.443418438768345	0.833333333333333	1	0.45698353148489	0	12	0.00620653297429006	HypoHigh	chr1	158059609	158061147	Intron8	+	KIRREL	protein_coding	chr1	158059609	158060533	0.992481203007519	0.600780234070221	*	*	*	*	*	0	0	*	*	*	*	*	0	0	chr1-158059625:158060015	chr1	158059625	158060015	chr1	158059625	158060015	chr1-158060129:158060413	chr1	158060129	158060413	chr1
chr1	158243406	158249804	0.0745108695652175	-0.232496676905729	0.982142857142857	0.875	0.112430022205671	0.319553921740019	47	1.79031730722537e-06	HypoLow	*	*	*	InterGenic	*	*	*	*	*	*	*	*	*	*	*	*	*	0	0	*	*	*	*	*	0	0	chr1-158244640:158244910	chr1	158244640	158244910	chr1	158244640	158244910	chr1-158249327:158249927	chr1	158249327	158249927	chr1
chr1	158259925	158262411	0.166666666666667	-0.30065166695513	0.958333333333333	0.769230769230769	0.216674140549451	0.5	20	0.00423250930939844	HypoLow	chr1	158259916	158260923	Intron1	+	CD1C	protein_coding	chr1	158259925	158260923	0.401448109412711	0.991062562065541	*	*	*	*	*	0	0	*	*	*	*	*	0	0	chr1-158260140:158260690	chr1	158260140	158260690	chr1	158260140	158260690	chr1-158260212:158260427	chr1	158260212	158260427	chr1
chr1	158259925	158262411	0.166666666666667	-0.30065166695513	0.958333333333333	0.769230769230769	0.216674140549451	0.5	20	0.00423250930939844	HypoLow	chr1	158260924	158261190	Exon2	+	CD1C	protein_coding	chr1	158260924	158261190	0.106999195494771	1	*	*	*	*	*	0	0	*	*	*	*	*	0	0	*	*	*	*	*	0	0	*	*	*	*	*
chr1	158259925	158262411	0.166666666666667	-0.30065166695513	0.958333333333333	0.769230769230769	0.216674140549451	0.5	20	0.00423250930939844	HypoLow	chr1	158261191	158261873	Intron2	+	CD1C	protein_coding	chr1	158261191	158261873	0.274336283185841	1	*	*	*	*	*	0	0	*	*	*	*	*	0	0	chr1-158261860:158262010	chr1	158261860	158262010	chr1	158261860	158261873	chr1-158261315:158261768	chr1	158261315	158261768	chr1
chr1	158259925	158262411	0.166666666666667	-0.30065166695513	0.958333333333333	0.769230769230769	0.216674140549451	0.5	20	0.00423250930939844	HypoLow	chr1	158261874	158262155	Exon3	+	CD1C	protein_coding	chr1	158261874	158262155	0.113032984714401	1	*	*	*	*	*	0	0	*	*	*	*	*	0	0	chr1-158261860:158262010	chr1	158261860	158262010	chr1	158261874	158262010	*	*	*	*	*
chr1	158259925	158262411	0.166666666666667	-0.30065166695513	0.958333333333333	0.769230769230769	0.216674140549451	0.5	20	0.00423250930939844	HypoLow	chr1	158262156	158262385	Intron3	+	CD1C	protein_coding	chr1	158262156	158262385	0.0921158487530169	1	*	*	*	*	*	0	0	*	*	*	*	*	0	0	*	*	*	*	*	0	0	*	*	*	*	*
chr1	158259925	158262411	0.166666666666667	-0.30065166695513	0.958333333333333	0.769230769230769	0.216674140549451	0.5	20	0.00423250930939844	HypoLow	chr1	158262386	158262664	Exon4	+	CD1C	protein_coding	chr1	158262386	158262411	0.0100563153660499	0.0899280575539568	*	*	*	*	*	0	0	*	*	*	*	*	0	0	*	*	*	*	*	0	0	*	*	*	*	*
chr1	158515231	158548446	0.08695652173913	-0.216247282633975	0.964240102171137	0.875	0.15633186452976	0.365265085000311	167	3.17622255817882e-23	HypoLow	chr1	158516918	158517895	FirstExon	-	OR6Y1	protein_coding	chr1	158516918	158517895	0.0294144211952431	1	*	*	*	*	*	0	0	*	*	*	*	*	0	0	*	*	*	*	*	0	0	chr1-158517366:158517828	chr1	158517366	158517828	chr1
chr1	158515231	158548446	0.08695652173913	-0.216247282633975	0.964240102171137	0.875	0.15633186452976	0.365265085000311	167	3.17622255817882e-23	HypoLow	chr1	158517896	158518896	Promoter	-	OR6Y1	protein_coding	chr1	158517896	158518896	0.0301068794219479	1	*	*	*	*	*	0	0	*	*	*	*	*	0	0	*	*	*	*	*	0	0	*	*	*	*	*
chr1	158515231	158548446	0.08695652173913	-0.216247282633975	0.964240102171137	0.875	0.15633186452976	0.365265085000311	167	3.17622255817882e-23	HypoLow	chr1	158532441	158533394	FirstExon	-	OR6P1	protein_coding	chr1	158532441	158533394	0.0286918560891164	1	*	*	*	*	*	0	0	*	*	*	*	*	0	0	*	*	*	*	*	0	0	chr1-158532620:158532830	chr1	158532620	158532830	chr1
chr1	158515231	158548446	0.08695652173913	-0.216247282633975	0.964240102171137	0.875	0.15633186452976	0.365265085000311	167	3.17622255817882e-23	HypoLow	chr1	158533395	158534395	Promoter	-	OR6P1	protein_coding	chr1	158533395	158534395	0.0301068794219479	1	*	*	*	*	*	0	0	*	*	*	*	*	0	0	*	*	*	*	*	0	0	chr1-158533955:158534405	chr1	158533955	158534405	chr1
chr1	159046208	159047162	-0.333333333333333	-0.348092313551137	0.0625	0.666666666666667	0.15633186452976	0.478506834760889	14	0.0111311800553375	HypoLow	chr1	159043310	159092028	Intron4	-	AIM2	protein_coding	chr1	159046208	159047162	1	0.0195820846504372	*	*	*	*	*	0	0	*	*	*	*	*	0	0	chr1-159046985:159047295	chr1	159046985	159047295	chr1	159046985	159047162	chr1-159047159:159047489	chr1	159047159	159047489	chr1
chr1	159155083	159163564	0.0852140690850365	-0.211142903818588	0.921538461538462	0.8	0.271327868795692	0.454551577882889	75	0.000204406070507958	HypoLow	chr1	159141644	159161725	Intron1	+	CADM3	protein_coding	chr1	159155083	159161725	0.7831623629289	0.330760420297794	CpG: 23	chr1	159158228	159158498	chr1	159158228	159158498	chr1:159158093-159158524	chr1	159158093	159158524	chr1	159158093	159158524	chr1-159160700:159160930	chr1	159160700	159160930	chr1	159160700	159160930	chr1-159158263:159158539	chr1	159158263	159158539	chr1
chr1	159155083	159163564	0.0852140690850365	-0.211142903818588	0.921538461538462	0.8	0.271327868795692	0.454551577882889	75	0.000204406070507958	HypoLow	chr1	159161726	159161866	Exon2	+	CADM3	protein_coding	chr1	159161726	159161866	0.0165074873246079	1	*	*	*	*	*	0	0	*	*	*	*	*	0	0	*	*	*	*	*	0	0	*	*	*	*	*
chr1	159155083	159163564	0.0852140690850365	-0.211142903818588	0.921538461538462	0.8	0.271327868795692	0.454551577882889	75	0.000204406070507958	HypoLow	chr1	159161867	159162367	Intron2	+	CADM3	protein_coding	chr1	159161867	159162367	0.0589553118735998	1	*	*	*	*	*	0	0	*	*	*	*	*	0	0	*	*	*	*	*	0	0	*	*	*	*	*
chr1	159155083	159163564	0.0852140690850365	-0.211142903818588	0.921538461538462	0.8	0.271327868795692	0.454551577882889	75	0.000204406070507958	HypoLow	chr1	159162368	159162520	Exon3	+	CADM3	protein_coding	chr1	159162368	159162520	0.0179224148095743	1	*	*	*	*	*	0	0	*	*	*	*	*	0	0	*	*	*	*	*	0	0	*	*	*	*	*
chr1	159155083	159163564	0.0852140690850365	-0.211142903818588	0.921538461538462	0.8	0.271327868795692	0.454551577882889	75	0.000204406070507958	HypoLow	chr1	159162521	159163212	Intron3	+	CADM3	protein_coding	chr1	159162521	159163212	0.0814762410093149	1	*	*	*	*	*	0	0	*	*	*	*	*	0	0	*	*	*	*	*	0	0	*	*	*	*	*
chr1	159155083	159163564	0.0852140690850365	-0.211142903818588	0.921538461538462	0.8	0.271327868795692	0.454551577882889	75	0.000204406070507958	HypoLow	chr1	159163213	159163350	Exon4	+	CADM3	protein_coding	chr1	159163213	159163350	0.0161537554533663	1	*	*	*	*	*	0	0	*	*	*	*	*	0	0	*	*	*	*	*	0	0	*	*	*	*	*
chr1	159155083	159163564	0.0852140690850365	-0.211142903818588	0.921538461538462	0.8	0.271327868795692	0.454551577882889	75	0.000204406070507958	HypoLow	chr1	159163351	159163659	Intron4	+	CADM3	protein_coding	chr1	159163351	159163564	0.0251149628581535	0.691558441558442	*	*	*	*	*	0	0	*	*	*	*	*	0	0	*	*	*	*	*	0	0	*	*	*	*	*
chr1	161109361	161110271	0.0685386473429955	-0.306748633648845	0.978260869565218	0.857142857142857	0.134176735655481	0.464070425952623	13	0.0317628897707666	HypoLow	*	*	*	InterGenic	*	*	*	*	*	*	*	*	*	*	*	*	*	0	0	*	*	*	*	*	0	0	chr1-161109660:161109975	chr1	161109660	161109975	chr1	161109660	161109975	chr1-161109626:161109917	chr1	161109626	161109917	chr1
chr1	161207112	161211778	0.091626409017713	-0.20240636956306	0.956439393939394	0.872282608695652	0.227022421374639	0.434681934822067	51	6.50441156475181e-06	HypoLow	chr1	161206389	161207830	Intron1	-	NR1I3	protein_coding	chr1	161207112	161207830	0.15387912558937	0.498265093684941	*	*	*	*	*	0	0	*	*	*	*	*	0	0	*	*	*	*	*	0	0	chr1-161207829:161208230	chr1	161207829	161208230	chr1
chr1	161207112	161211778	0.091626409017713	-0.20240636956306	0.956439393939394	0.872282608695652	0.227022421374639	0.434681934822067	51	6.50441156475181e-06	HypoLow	chr1	161207831	161208092	FirstExon	-	NR1I3	protein_coding	chr1	161207831	161208092	0.0559365623660523	1	*	*	*	*	*	0	0	*	*	*	*	*	0	0	chr1-161207840:161208315	chr1	161207840	161208315	chr1	161207840	161208092	chr1-161207994:161208234	chr1	161207994	161208234	chr1
chr1	161207112	161211778	0.091626409017713	-0.20240636956306	0.956439393939394	0.872282608695652	0.227022421374639	0.434681934822067	51	6.50441156475181e-06	HypoLow	chr1	161208093	161209093	Promoter	-	NR1I3	protein_coding	chr1	161208093	161209093	0.214316330904415	1	*	*	*	*	*	0	0	*	*	*	*	*	0	0	chr1-161207840:161208315	chr1	161207840	161208315	chr1	161208093	161208315	chr1-161209033:161209537	chr1	161209033	161209537	chr1
chr1	162229127	162236254	0.080234553775744	-0.217129451474756	0.962912087912088	0.853571428571428	0.159076059055865	0.414711651554832	41	0.000241031162326218	HypoLow	chr1	162124267	162257133	Intron2	+	NOS1AP	protein_coding	chr1	162229127	162236254	1	0.0536405099875062	*	*	*	*	*	0	0	*	*	*	*	*	0	0	chr1-162236180:162236375	chr1	162236180	162236375	chr1	162236180	162236254	chr1-162236176:162236692	chr1	162236176	162236692	chr1
chr1	162357608	162358233	0.092418546365915	-0.210943178088708	0.922619047619048	0.732142857142857	0.268259240521842	0.491710461180406	15	0.0445160569702452	HypoLow	*	*	*	InterGenic	*	*	*	*	*	*	*	*	*	*	*	*	*	0	0	*	*	*	*	*	0	0	chr1-162357865:162358175	chr1	162357865	162358175	chr1	162357865	162358175	chr1-162358232:162358825	chr1	162358232	162358825	chr1
chr1	162721798	162728532	0.065015479876161	-0.270426041486378	0.954545454545455	0.875	0.167752778258549	0.346950694324252	38	7.1257519335301e-06	HypoLow	chr1	162688936	162722884	Intron4	+	DDR2	protein_coding	chr1	162721798	162722884	0.161271161271161	0.0319901025097208	*	*	*	*	*	0	0	*	*	*	*	*	0	0	chr1-162722305:162722455	chr1	162722305	162722455	chr1	162722305	162722455	chr1-162722866:162723090	chr1	162722866	162723090	chr1
chr1	162721798	162728532	0.065015479876161	-0.270426041486378	0.954545454545455	0.875	0.167752778258549	0.346950694324252	38	7.1257519335301e-06	HypoLow	chr1	162722885	162722987	Exon5	+	DDR2	protein_coding	chr1	162722885	162722987	0.0151470151470151	1	*	*	*	*	*	0	0	*	*	*	*	*	0	0	chr1-162722885:162723350	chr1	162722885	162723350	chr1	162722885	162722987	chr1-162722970:162723694	chr1	162722970	162723694	chr1
chr1	162721798	162728532	0.065015479876161	-0.270426041486378	0.954545454545455	0.875	0.167752778258549	0.346950694324252	38	7.1257519335301e-06	HypoLow	chr1	162722988	162724413	Intron5	+	DDR2	protein_coding	chr1	162722988	162724413	0.211612711612712	1	*	*	*	*	*	0	0	*	*	*	*	*	0	0	chr1-162724385:162724535	chr1	162724385	162724535	chr1	162724385	162724413	chr1-162723898:162724298	chr1	162723898	162724298	chr1
chr1	162721798	162728532	0.065015479876161	-0.270426041486378	0.954545454545455	0.875	0.167752778258549	0.346950694324252	38	7.1257519335301e-06	HypoLow	chr1	162724414	162724645	Exon6	+	DDR2	protein_coding	chr1	162724414	162724645	0.0343035343035343	1	*	*	*	*	*	0	0	*	*	*	*	*	0	0	chr1-162724385:162724535	chr1	162724385	162724535	chr1	162724414	162724535	*	*	*	*	*
chr1	162721798	162728532	0.065015479876161	-0.270426041486378	0.954545454545455	0.875	0.167752778258549	0.346950694324252	38	7.1257519335301e-06	HypoLow	chr1	162724646	162724945	Intron6	+	DDR2	protein_coding	chr1	162724646	162724945	0.0444015444015444	1	*	*	*	*	*	0	0	*	*	*	*	*	0	0	*	*	*	*	*	0	0	chr1-162724825:162725235	chr1	162724825	162725235	chr1
chr1	162721798	162728532	0.065015479876161	-0.270426041486378	0.954545454545455	0.875	0.167752778258549	0.346950694324252	38	7.1257519335301e-06	HypoLow	chr1	162724946	162725093	Exon7	+	DDR2	protein_coding	chr1	162724946	162725093	0.0218295218295218	1	*	*	*	*	*	0	0	*	*	*	*	*	0	0	*	*	*	*	*	0	0	chr1-162724825:162725235	chr1	162724825	162725235	chr1
chr1	162721798	162728532	0.065015479876161	-0.270426041486378	0.954545454545455	0.875	0.167752778258549	0.346950694324252	38	7.1257519335301e-06	HypoLow	chr1	162725094	162725453	Intron7	+	DDR2	protein_coding	chr1	162725094	162725453	0.0533115533115533	1	*	*	*	*	*	0	0	*	*	*	*	*	0	0	chr1-162725160:162725410	chr1	162725160	162725410	chr1	162725160	162725410	chr1-162725265:162725549	chr1	162725265	162725549	chr1
chr1	162721798	162728532	0.065015479876161	-0.270426041486378	0.954545454545455	0.875	0.167752778258549	0.346950694324252	38	7.1257519335301e-06	HypoLow	chr1	162725454	162725559	Exon8	+	DDR2	protein_coding	chr1	162725454	162725559	0.0155925155925156	1	*	*	*	*	*	0	0	*	*	*	*	*	0	0	*	*	*	*	*	0	0	chr1-162725265:162725549	chr1	162725265	162725549	chr1
chr1	162721798	162728532	0.065015479876161	-0.270426041486378	0.954545454545455	0.875	0.167752778258549	0.346950694324252	38	7.1257519335301e-06	HypoLow	chr1	162725560	162729585	Intron8	+	DDR2	protein_coding	chr1	162725560	162728532	0.441342441342441	0.738385093167702	*	*	*	*	*	0	0	*	*	*	*	*	0	0	chr1-162727360:162727610	chr1	162727360	162727610	chr1	162727360	162727610	chr1-162727952:162728362	chr1	162727952	162728362	chr1
chr1	164195076	164201851	-0.205555555555556	0.119995994527574	0.555555555555556	0.857142857142857	0.584238426326568	0.453654682481227	42	0.000797686666999247	HypoHigh	*	*	*	InterGenic	*	*	*	*	*	*	*	*	*	*	*	*	*	0	0	*	*	*	*	*	0	0	chr1-164198045:164198195	chr1	164198045	164198195	chr1	164198045	164198195	chr1-164197595:164197865	chr1	164197595	164197865	chr1
chr1	164290154	164291069	0.209150326797385	0.039301404968508	0.454545454545455	0.142857142857143	0.537399074234331	0.482205555876069	28	0.00416285393381094	HyperHigh	*	*	*	InterGenic	*	*	*	*	*	*	*	*	CpG: 34	chr1	164290515	164290767	chr1	164290515	164290767	chr1:164289956-164290255	chr1	164289956	164290255	chr1	164290154	164290255	chr1-164290525:164291035	chr1	164290525	164291035	chr1	164290525	164291035	chr1-164290534:164290914	chr1	164290534	164290914	chr1
chr1	164745245	164746487	0.055727554179567	-0.29600324684945	0.948684210526316	0.891812865497076	0.206949200038446	0.478491765742445	11	0.0960533908497632	HypoLow	chr1	164532549	164761730	Intron2	+	PBX1	protein_coding	chr1	164745245	164746487	1	0.00541929741121646	*	*	*	*	*	0	0	*	*	*	*	*	0	0	chr1-164746225:164746375	chr1	164746225	164746375	chr1	164746225	164746375	*	*	*	*	*
chr1	164914207	164920212	0.0588690476190475	-0.211904082185502	0.841032608695652	0.763888888888889	0.318260015764987	0.585082504961033	15	0.311890005417286	HypoLow	*	*	*	InterGenic	*	*	*	*	*	*	*	*	*	*	*	*	*	0	0	*	*	*	*	*	0	0	chr1-164920060:164920335	chr1	164920060	164920335	chr1	164920060	164920212	chr1-164919979:164920339	chr1	164919979	164920339	chr1
chr1	165272634	165273167	0.142857142857143	-0.373480966096583	0.928571428571429	0.777777777777778	0.240642698295787	0.597493750120193	10	0.0148044332816829	HypoLow	chr1	165218878	165322312	Intron3	-	LMX1A	protein_coding	chr1	165272634	165273167	1	0.00515304445346791	*	*	*	*	*	0	0	*	*	*	*	*	0	0	chr1-165272740:165272890	chr1	165272740	165272890	chr1	165272740	165272890	chr1-165272764:165273054	chr1	165272764	165273054	chr1
chr1	167073228	167073774	0.268842268842269	0.0205488989383515	0.636446886446886	0.303030303030303	0.581459407773271	0.567957300673399	13	0.0101766817515518	HyperHigh	chr1	167064197	167082946	Intron2	+	DUSP27	protein_coding	chr1	167073228	167073774	1	0.0291215531495013	*	*	*	*	*	0	0	*	*	*	*	*	0	0	chr1-167073480:167073795	chr1	167073480	167073795	chr1	167073480	167073774	chr1-167073521:167073885	chr1	167073521	167073885	chr1
chr1	167666991	167667349	0.312020460358056	-0.000905092993234935	0.80952380952381	0.423076923076923	0.520426041486377	0.53783991141084	12	0.00641327104266395	HyperHigh	chr1	167666336	167667079	Exon6	+	RCSD1	protein_coding	chr1	167666991	167667079	0.245810055865922	0.118438761776581	*	*	*	*	*	0	0	*	*	*	*	*	0	0	chr1-167666960:167667455	chr1	167666960	167667455	chr1	167666991	167667079	chr1-167667066:167667338	chr1	167667066	167667338	chr1
chr1	167666991	167667349	0.312020460358056	-0.000905092993234935	0.80952380952381	0.423076923076923	0.520426041486377	0.53783991141084	12	0.00641327104266395	HyperHigh	chr1	167667080	167673900	Intron6	+	RCSD1	protein_coding	chr1	167667080	167667349	0.751396648044693	0.0394428152492669	*	*	*	*	*	0	0	*	*	*	*	*	0	0	chr1-167666960:167667455	chr1	167666960	167667455	chr1	167667080	167667349	chr1-167667194:167667372	chr1	167667194	167667372	chr1
chr1	168441078	168448688	0.129166666666667	-0.287706856188877	1	0.8	0.0562150111028355	0.478491765742445	33	0.00101937030902667	HypoLow	chr1	168433612	168454480	Intron4	-	RP5-968D22.3	lincRNA	chr1	168441078	168448688	1	0.36467318382212	*	*	*	*	*	0	0	chr1:168446219-168446589	chr1	168446219	168446589	chr1	168446219	168446589	chr1-168447420:168447570	chr1	168447420	168447570	chr1	168447420	168447570	chr1-168447335:168447559	chr1	168447335	168447559	chr1
chr1	168622728	168627718	0.083333333333333	-0.232511216493792	1	0.875	0.0954656523719854	0.365265085000311	32	1.18016445870826e-05	HypoLow	*	*	*	InterGenic	*	*	*	*	*	*	*	*	*	*	*	*	*	0	0	*	*	*	*	*	0	0	chr1-168626480:168626630	chr1	168626480	168626630	chr1	168626480	168626630	chr1-168626497:168626767	chr1	168626497	168626767	chr1
chr1	169014518	169021717	0.110367892976589	-0.263012767399469	1	0.846153846153846	0.107585652965799	0.382944951426972	44	2.41298973566378e-10	HypoLow	chr1	168877209	169025421	Intron3	-	LINC00970	antisense	chr1	169014518	169021717	1	0.0485723153320919	*	*	*	*	*	0	0	*	*	*	*	*	0	0	chr1-169018580:169019170	chr1	169018580	169019170	chr1	169018580	169019170	chr1-169021533:169022109	chr1	169021533	169022109	chr1
chr1	169077249	169078857	0.109243697478991	-0.25224145934699	0.818014705882353	0.486842105263158	0.447190565493391	0.669660301226408	19	0.0789246050164278	HypoLow	chr1	169076165	169080607	Intron2	+	ATP1B1	protein_coding	chr1	169077249	169078857	1	0.361999099504728	*	*	*	*	*	0	0	*	*	*	*	*	0	0	chr1-169078520:169078830	chr1	169078520	169078830	chr1	169078520	169078830	chr1-169078849:169079266	chr1	169078849	169079266	chr1
chr1	169078967	169081789	-0.0877192982456142	-0.206949200038446	0	0.162280701754386	0	0.329615164877711	23	0.0190040573613293	HypoLow	chr1	169076165	169080607	Intron2	+	ATP1B1	protein_coding	chr1	169078967	169080607	0.581148121899362	0.369203061683926	*	*	*	*	*	0	0	*	*	*	*	*	0	0	chr1-169080360:169080610	chr1	169080360	169080610	chr1	169080360	169080607	chr1-169080584:169081157	chr1	169080584	169081157	chr1
chr1	169078967	169081789	-0.0877192982456142	-0.206949200038446	0	0.162280701754386	0	0.329615164877711	23	0.0190040573613293	HypoLow	chr1	169080608	169080736	Exon3	+	ATP1B1	protein_coding	chr1	169080608	169080736	0.0453579021970234	1	*	*	*	*	*	0	0	*	*	*	*	*	0	0	chr1-169080360:169080610	chr1	169080360	169080610	chr1	169080608	169080610	chr1-169080584:169081157	chr1	169080584	169081157	chr1
chr1	169078967	169081789	-0.0877192982456142	-0.206949200038446	0	0.162280701754386	0	0.329615164877711	23	0.0190040573613293	HypoLow	chr1	169080737	169094121	Intron3	+	ATP1B1	protein_coding	chr1	169080737	169081789	0.372785258681786	0.0786013150029886	*	*	*	*	*	0	0	*	*	*	*	*	0	0	chr1-169081500:169081810	chr1	169081500	169081810	chr1	169081500	169081789	chr1-169081617:169081881	chr1	169081617	169081881	chr1
chr1	170895516	170905736	0.048809523809524	-0.216831810615385	0.923076923076923	0.864253393665159	0.201842495543515	0.404196563510294	55	0.114937057849791	HypoLow	chr1	170903666	170904666	Promoter	+	MROH9	protein_coding	chr1	170903666	170904666	0.0978473581213307	1	*	*	*	*	*	0	0	*	*	*	*	*	0	0	chr1-170904405:170904715	chr1	170904405	170904715	chr1	170904405	170904666	*	*	*	*	*
chr1	170895516	170905736	0.048809523809524	-0.216831810615385	0.923076923076923	0.864253393665159	0.201842495543515	0.404196563510294	55	0.114937057849791	HypoLow	chr1	170904667	170904728	FirstExon	+	MROH9	protein_coding	chr1	170904667	170904728	0.00596868884540117	1	*	*	*	*	*	0	0	*	*	*	*	*	0	0	chr1-170904405:170904715	chr1	170904405	170904715	chr1	170904667	170904715	*	*	*	*	*
chr1	170895516	170905736	0.048809523809524	-0.216831810615385	0.923076923076923	0.864253393665159	0.201842495543515	0.404196563510294	55	0.114937057849791	HypoLow	chr1	170904729	170914660	Intron1	+	MROH9	protein_coding	chr1	170904729	170905736	0.09853228962818	0.1013996576377	*	*	*	*	*	0	0	*	*	*	*	*	0	0	*	*	*	*	*	0	0	*	*	*	*	*
chr1	171826942	171839683	0.0773631402922025	-0.263366262357448	0.953463203463204	0.872282608695652	0.15633186452976	0.419180431689793	55	4.31846932675686e-07	HypoLow	chr1	171810958	171890887	Intron1	+	DNM3	protein_coding	chr1	171826942	171839683	1	0.159403971024284	*	*	*	*	*	0	0	chr1:171832189-171832290	chr1	171832189	171832290	chr1	171832189	171832290	chr1-171838300:171838655	chr1	171838300	171838655	chr1	171838300	171838655	chr1-171839647:171840231	chr1	171839647	171840231	chr1
chr1	171826942	171839683	0.0773631402922025	-0.263366262357448	0.953463203463204	0.872282608695652	0.15633186452976	0.419180431689793	55	4.31846932675686e-07	HypoLow	chr1	171832326	171833326	Promoter	+	DNM3-IT1	sense_intronic	chr1	171832326	171833326	0.0784867749784161	1	*	*	*	*	*	0	0	*	*	*	*	*	0	0	chr1-171832760:171832970	chr1	171832760	171832970	chr1	171832760	171832970	*	*	*	*	*
chr1	171826942	171839683	0.0773631402922025	-0.263366262357448	0.953463203463204	0.872282608695652	0.15633186452976	0.419180431689793	55	4.31846932675686e-07	HypoLow	chr1	171833327	171833433	FirstExon	+	DNM3-IT1	sense_intronic	chr1	171833327	171833433	0.00831959814771211	1	*	*	*	*	*	0	0	*	*	*	*	*	0	0	*	*	*	*	*	0	0	*	*	*	*	*
chr1	171826942	171839683	0.0773631402922025	-0.263366262357448	0.953463203463204	0.872282608695652	0.15633186452976	0.419180431689793	55	4.31846932675686e-07	HypoLow	chr1	171833434	171833538	Intron1	+	DNM3-IT1	sense_intronic	chr1	171833434	171833538	0.00816262459775528	1	*	*	*	*	*	0	0	*	*	*	*	*	0	0	*	*	*	*	*	0	0	*	*	*	*	*
chr1	171826942	171839683	0.0773631402922025	-0.263366262357448	0.953463203463204	0.872282608695652	0.15633186452976	0.419180431689793	55	4.31846932675686e-07	HypoLow	chr1	171833539	171833827	LastExon	+	DNM3-IT1	sense_intronic	chr1	171833539	171833827	0.0226041911937838	1	*	*	*	*	*	0	0	*	*	*	*	*	0	0	chr1-171833545:171833695	chr1	171833545	171833695	chr1	171833545	171833695	*	*	*	*	*
chr1	173603173	173617135	0.0676470588235289	-0.216674140549451	1	0.9	0.137938950101211	0.306098611351497	70	7.2780546667872e-09	HypoLow	chr1	173596299	173615984	Intron3	-	ANKRD45	protein_coding	chr1	173603173	173615984	0.917561953874803	0.650800101600203	*	*	*	*	*	0	0	*	*	*	*	*	0	0	chr1-173615845:173616050	chr1	173615845	173616050	chr1	173615845	173615984	chr1-173615957:173616187	chr1	173615957	173616187	chr1
chr1	173603173	173617135	0.0676470588235289	-0.216674140549451	1	0.9	0.137938950101211	0.306098611351497	70	7.2780546667872e-09	HypoLow	chr1	173615985	173616152	Exon3	-	ANKRD45	protein_coding	chr1	173615985	173616152	0.0119610371007019	1	*	*	*	*	*	0	0	*	*	*	*	*	0	0	chr1-173615845:173616050	chr1	173615845	173616050	chr1	173615985	173616050	chr1-173615957:173616187	chr1	173615957	173616187	chr1
chr1	173603173	173617135	0.0676470588235289	-0.216674140549451	1	0.9	0.137938950101211	0.306098611351497	70	7.2780546667872e-09	HypoLow	chr1	173616153	173628229	Intron2	-	ANKRD45	protein_coding	chr1	173616153	173617135	0.0703337630711932	0.0813183173236171	*	*	*	*	*	0	0	*	*	*	*	*	0	0	*	*	*	*	*	0	0	chr1-173615957:173616187	chr1	173615957	173616187	chr1
chr1	173603173	173617135	0.0676470588235289	-0.216674140549451	1	0.9	0.137938950101211	0.306098611351497	70	7.2780546667872e-09	HypoLow	chr1	173603911	173604911	Promoter	+	RP11-360D2.1	antisense	chr1	173603911	173604911	0.0716229766509096	1	*	*	*	*	*	0	0	*	*	*	*	*	0	0	*	*	*	*	*	0	0	chr1-173604598:173605182	chr1	173604598	173605182	chr1
chr1	173603173	173617135	0.0676470588235289	-0.216674140549451	1	0.9	0.137938950101211	0.306098611351497	70	7.2780546667872e-09	HypoLow	chr1	173604912	173604984	FirstExon	+	RP11-360D2.1	antisense	chr1	173604912	173604984	0.00515685431886549	1	*	*	*	*	*	0	0	*	*	*	*	*	0	0	*	*	*	*	*	0	0	chr1-173604598:173605182	chr1	173604598	173605182	chr1
chr1	173603173	173617135	0.0676470588235289	-0.216674140549451	1	0.9	0.137938950101211	0.306098611351497	70	7.2780546667872e-09	HypoLow	chr1	173604985	173605965	Intron1	+	RP11-360D2.1	antisense	chr1	173604985	173605965	0.0701905171178914	1	*	*	*	*	*	0	0	*	*	*	*	*	0	0	*	*	*	*	*	0	0	chr1-173605549:173606069	chr1	173605549	173606069	chr1
chr1	173603173	173617135	0.0676470588235289	-0.216674140549451	1	0.9	0.137938950101211	0.306098611351497	70	7.2780546667872e-09	HypoLow	chr1	173605966	173606273	LastExon	+	RP11-360D2.1	antisense	chr1	173605966	173606273	0.0219882538318293	1	*	*	*	*	*	0	0	*	*	*	*	*	0	0	*	*	*	*	*	0	0	chr1-173605549:173606069	chr1	173605549	173606069	chr1
chr1	173638166	173638992	0.310897435897436	-0.02271029822545	0.896551724137931	0.285714285714286	0.407015928393239	0.331909150694975	20	0.00464545298110942	HyperHigh	chr1	173628573	173638955	Intron1	-	ANKRD45	protein_coding	chr1	173638166	173638955	0.955205811138015	0.0759969177422462	CpG: 32	chr1	173638662	173639045	chr1	173638662	173638955	*	*	*	*	*	0	0	chr1-173638625:173639130	chr1	173638625	173639130	chr1	173638625	173638955	chr1-173638903:173639808	chr1	173638903	173639808	chr1
chr1	173638166	173638992	0.310897435897436	-0.02271029822545	0.896551724137931	0.285714285714286	0.407015928393239	0.331909150694975	20	0.00464545298110942	HyperHigh	chr1	173638956	173639001	FirstExon	-	ANKRD45	protein_coding	chr1	173638956	173638992	0.0435835351089588	0.8	CpG: 32	chr1	173638662	173639045	chr1	173638956	173638992	*	*	*	*	*	0	0	chr1-173638625:173639130	chr1	173638625	173639130	chr1	173638956	173638992	chr1-173638903:173639808	chr1	173638903	173639808	chr1
chr1	174029704	174048623	0.0625	-0.212362512172387	0.962962962962963	0.916666666666667	0.161820253581971	0.381703471460528	154	3.57043155942181e-08	HypoLow	*	*	*	InterGenic	*	*	*	*	*	*	*	*	*	*	*	*	*	0	0	*	*	*	*	*	0	0	chr1-174048140:174048370	chr1	174048140	174048370	chr1	174048140	174048370	chr1-174048577:174048981	chr1	174048577	174048981	chr1
chr1	175453856	175459557	0.0928853754940711	-0.255829047648484	0.956521739130435	0.888888888888889	0.15633186452976	0.425871145606372	36	8.44297741821353e-07	HypoLow	chr1	175375914	175497404	Intron2	-	TNR	protein_coding	chr1	175453856	175459557	1	0.0469256728948885	*	*	*	*	*	0	0	*	*	*	*	*	0	0	chr1-175457565:175457715	chr1	175457565	175457715	chr1	175457565	175457715	chr1-175458461:175458781	chr1	175458461	175458781	chr1
chr1	175591666	175595173	0.118220142748175	-0.233688757334499	0.955533596837945	0.825757575757575	0.145748443569421	0.380871015482699	23	0.000146340429655805	HypoLow	chr1	175497506	175712361	Intron1	-	TNR	protein_coding	chr1	175591666	175595173	1	0.0163226361965046	*	*	*	*	*	0	0	*	*	*	*	*	0	0	chr1-175592865:175593015	chr1	175592865	175593015	chr1	175592865	175593015	*	*	*	*	*
chr1	175779144	175796816	0.08695652173913	-0.307309364962454	0.962962962962963	0.857142857142857	0.15633186452976	0.446089642692155	76	2.20516514616219e-10	HypoLow	*	*	*	InterGenic	*	*	*	*	*	*	*	*	*	*	*	*	*	0	0	*	*	*	*	*	0	0	chr1-175795865:175796150	chr1	175795865	175796150	chr1	175795865	175796150	chr1-175795923:175796125	chr1	175795923	175796125	chr1
chr1	176177292	176199229	0.076923076923077	-0.204789815295586	0.964285714285714	0.888888888888889	0.21340214445349	0.385593216482346	126	6.11493497486474e-13	HypoLow	chr1	176176630	176177630	Promoter	-	RFWD2	protein_coding	chr1	176177292	176177630	0.0154077585813922	0.338	*	*	*	*	*	0	0	*	*	*	*	*	0	0	chr1-176177525:176177675	chr1	176177525	176177675	chr1	176177525	176177630	chr1-176177612:176178132	chr1	176177612	176178132	chr1
chr1	176177292	176199229	0.076923076923077	-0.204789815295586	0.964285714285714	0.888888888888889	0.21340214445349	0.385593216482346	126	6.11493497486474e-13	HypoLow	chr1	176177008	176187669	Intron1	+	RP11-195C7.1	antisense	chr1	176177292	176187669	0.473036422482564	0.973360847950474	*	*	*	*	*	0	0	*	*	*	*	*	0	0	chr1-176183425:176183595	chr1	176183425	176183595	chr1	176183425	176183595	chr1-176186605:176187081	chr1	176186605	176187081	chr1
chr1	176177292	176199229	0.076923076923077	-0.204789815295586	0.964285714285714	0.888888888888889	0.21340214445349	0.385593216482346	126	6.11493497486474e-13	HypoLow	chr1	176187670	176187782	Exon2	+	RP11-195C7.1	antisense	chr1	176187670	176187782	0.00510552947075717	1	*	*	*	*	*	0	0	*	*	*	*	*	0	0	*	*	*	*	*	0	0	*	*	*	*	*
chr1	176177292	176199229	0.076923076923077	-0.204789815295586	0.964285714285714	0.888888888888889	0.21340214445349	0.385593216482346	126	6.11493497486474e-13	HypoLow	chr1	176187783	176198224	Intron2	+	RP11-195C7.1	antisense	chr1	176187783	176198224	0.475953867894425	1	*	*	*	*	*	0	0	*	*	*	*	*	0	0	chr1-176197805:176197955	chr1	176197805	176197955	chr1	176197805	176197955	chr1-176195051:176195508	chr1	176195051	176195508	chr1
chr1	176177292	176199229	0.076923076923077	-0.204789815295586	0.964285714285714	0.888888888888889	0.21340214445349	0.385593216482346	126	6.11493497486474e-13	HypoLow	chr1	176198225	176198466	LastExon	+	RP11-195C7.1	antisense	chr1	176198225	176198466	0.01098600537904	1	*	*	*	*	*	0	0	*	*	*	*	*	0	0	*	*	*	*	*	0	0	*	*	*	*	*
chr1	176404530	176427781	0.11437908496732	-0.279360616222203	0.984375	0.846153846153846	0.137938950101211	0.450548038384464	109	2.4265598164108e-18	HypoLow	*	*	*	InterGenic	*	*	*	*	*	*	*	*	*	*	*	*	*	0	0	*	*	*	*	*	0	0	chr1-176427445:176427735	chr1	176427445	176427735	chr1	176427445	176427735	chr1-176426127:176426597	chr1	176426127	176426597	chr1
chr1	176569253	176573488	0.110275689223057	-0.240642698295787	0.952380952380952	0.869565217391304	0.216674140549451	0.473245572601161	36	0.000309946154565185	HypoLow	chr1	176564732	176640105	Intron3	+	PAPPA2	protein_coding	chr1	176569253	176573488	1	0.0561872288485267	*	*	*	*	*	0	0	*	*	*	*	*	0	0	chr1-176572965:176573170	chr1	176572965	176573170	chr1	176572965	176573170	chr1-176572573:176572848	chr1	176572573	176572848	chr1
chr1	176991102	176998800	-0.065079365079365	0.256872332363562	0.889676113360324	0.944444444444444	0.432894314770283	0.211567436054519	59	0.00942984209595334	HypoHigh	chr1	176984012	176992539	Intron7	-	ASTN1	protein_coding	chr1	176991102	176992539	0.186671862821512	0.168523513545209	*	*	*	*	*	0	0	*	*	*	*	*	0	0	chr1-176992425:176992635	chr1	176992425	176992635	chr1	176992425	176992539	*	*	*	*	*
chr1	176991102	176998800	-0.065079365079365	0.256872332363562	0.889676113360324	0.944444444444444	0.432894314770283	0.211567436054519	59	0.00942984209595334	HypoHigh	chr1	176992540	176992707	Exon7	-	ASTN1	protein_coding	chr1	176992540	176992707	0.0216939464796051	1	*	*	*	*	*	0	0	*	*	*	*	*	0	0	chr1-176992425:176992635	chr1	176992425	176992635	chr1	176992540	176992635	*	*	*	*	*
chr1	176991102	176998800	-0.065079365079365	0.256872332363562	0.889676113360324	0.944444444444444	0.432894314770283	0.211567436054519	59	0.00942984209595334	HypoHigh	chr1	176992708	176993718	Intron6	-	ASTN1	protein_coding	chr1	176992708	176993718	0.131202909846713	1	*	*	*	*	*	0	0	*	*	*	*	*	0	0	chr1-176993660:176994095	chr1	176993660	176994095	chr1	176993660	176993718	chr1-176992911:176993275	chr1	176992911	176993275	chr1
chr1	176991102	176998800	-0.065079365079365	0.256872332363562	0.889676113360324	0.944444444444444	0.432894314770283	0.211567436054519	59	0.00942984209595334	HypoHigh	chr1	176993719	176993868	Exon6	-	ASTN1	protein_coding	chr1	176993719	176993868	0.0193556767991686	1	*	*	*	*	*	0	0	*	*	*	*	*	0	0	chr1-176993660:176994095	chr1	176993660	176994095	chr1	176993719	176993868	chr1-176993802:176994334	chr1	176993802	176994334	chr1
chr1	176991102	176998800	-0.065079365079365	0.256872332363562	0.889676113360324	0.944444444444444	0.432894314770283	0.211567436054519	59	0.00942984209595334	HypoHigh	chr1	176993869	176998769	Intron5	-	ASTN1	protein_coding	chr1	176993869	176998769	0.636528968563263	1	*	*	*	*	*	0	0	chr1:176995001-176995332	chr1	176995001	176995332	chr1	176995001	176995332	chr1-176998585:176998835	chr1	176998585	176998835	chr1	176998585	176998769	chr1-176993802:176994334	chr1	176993802	176994334	chr1
chr1	176991102	176998800	-0.065079365079365	0.256872332363562	0.889676113360324	0.944444444444444	0.432894314770283	0.211567436054519	59	0.00942984209595334	HypoHigh	chr1	176998770	176998877	Exon5	-	ASTN1	protein_coding	chr1	176998770	176998800	0.00389711613406079	0.280373831775701	*	*	*	*	*	0	0	*	*	*	*	*	0	0	chr1-176998585:176998835	chr1	176998585	176998835	chr1	176998770	176998800	*	*	*	*	*
chr1	177148249	177149784	-0.178237874097007	0.265281465807454	0.742105263157895	0.912962962962963	0.486479376544059	0.137669215612174	9	0.103307970131365	HypoHigh	chr1	177140869	177198936	Intron1	+	BRINP2	protein_coding	chr1	177148249	177149784	1	0.0264349802813991	*	*	*	*	*	0	0	*	*	*	*	*	0	0	chr1-177149385:177149555	chr1	177149385	177149555	chr1	177149385	177149555	*	*	*	*	*
chr1	177648937	177665233	0.091894173937518	-0.212118727317055	0.958260869565217	0.826086956521739	0.253468838058248	0.507309364962454	91	8.33663197267032e-09	HypoLow	*	*	*	InterGenic	*	*	*	*	*	*	*	*	*	*	*	*	*	0	0	*	*	*	*	*	0	0	chr1-177662000:177662170	chr1	177662000	177662170	chr1	177662000	177662170	chr1-177657876:177658286	chr1	177657876	177658286	chr1
chr1	177903663	177913156	0.07257326007326	-0.222805822640269	0.962962962962963	0.868115942028985	0.197224259527442	0.41684824121824	111	3.19229277688842e-10	HypoLow	chr1	177902772	177905432	Intron20	-	SEC16B	protein_coding	chr1	177903663	177905432	0.186347835247024	0.665037593984962	*	*	*	*	*	0	0	*	*	*	*	*	0	0	chr1-177904865:177905175	chr1	177904865	177905175	chr1	177904865	177905175	chr1-177903711:177903906	chr1	177903711	177903906	chr1
chr1	177903663	177913156	0.07257326007326	-0.222805822640269	0.962962962962963	0.868115942028985	0.197224259527442	0.41684824121824	111	3.19229277688842e-10	HypoLow	chr1	177905433	177905500	Exon20	-	SEC16B	protein_coding	chr1	177905433	177905500	0.0070578320868008	1	*	*	*	*	*	0	0	*	*	*	*	*	0	0	chr1-177905485:177905955	chr1	177905485	177905955	chr1	177905485	177905500	*	*	*	*	*
chr1	177903663	177913156	0.07257326007326	-0.222805822640269	0.962962962962963	0.868115942028985	0.197224259527442	0.41684824121824	111	3.19229277688842e-10	HypoLow	chr1	177905501	177906348	Intron19	-	SEC16B	protein_coding	chr1	177905501	177906348	0.0892236384704519	1	*	*	*	*	*	0	0	*	*	*	*	*	0	0	chr1-177906285:177906435	chr1	177906285	177906435	chr1	177906285	177906348	chr1-177906045:177906449	chr1	177906045	177906449	chr1
chr1	177903663	177913156	0.07257326007326	-0.222805822640269	0.962962962962963	0.868115942028985	0.197224259527442	0.41684824121824	111	3.19229277688842e-10	HypoLow	chr1	177906349	177906648	Exon19	-	SEC16B	protein_coding	chr1	177906349	177906648	0.0314968924470663	1	*	*	*	*	*	0	0	*	*	*	*	*	0	0	chr1-177906525:177906850	chr1	177906525	177906850	chr1	177906525	177906648	chr1-177906045:177906449	chr1	177906045	177906449	chr1
chr1	177903663	177913156	0.07257326007326	-0.222805822640269	0.962962962962963	0.868115942028985	0.197224259527442	0.41684824121824	111	3.19229277688842e-10	HypoLow	chr1	177906649	177908836	Intron18	-	SEC16B	protein_coding	chr1	177906649	177908836	0.230380280206468	1	*	*	*	*	*	0	0	*	*	*	*	*	0	0	chr1-177908340:177908635	chr1	177908340	177908635	chr1	177908340	177908635	chr1-177907157:177907427	chr1	177907157	177907427	chr1
chr1	177903663	177913156	0.07257326007326	-0.222805822640269	0.962962962962963	0.868115942028985	0.197224259527442	0.41684824121824	111	3.19229277688842e-10	HypoLow	chr1	177908837	177908912	Exon18	-	SEC16B	protein_coding	chr1	177908837	177908912	0.0079005583061203	1	*	*	*	*	*	0	0	*	*	*	*	*	0	0	*	*	*	*	*	0	0	*	*	*	*	*
chr1	177903663	177913156	0.07257326007326	-0.222805822640269	0.962962962962963	0.868115942028985	0.197224259527442	0.41684824121824	111	3.19229277688842e-10	HypoLow	chr1	177908913	177909744	Intron17	-	SEC16B	protein_coding	chr1	177908913	177909744	0.0875381860318129	1	*	*	*	*	*	0	0	*	*	*	*	*	0	0	chr1-177909045:177909195	chr1	177909045	177909195	chr1	177909045	177909195	*	*	*	*	*
chr1	177903663	177913156	0.07257326007326	-0.222805822640269	0.962962962962963	0.868115942028985	0.197224259527442	0.41684824121824	111	3.19229277688842e-10	HypoLow	chr1	177909745	177909849	Exon17	-	SEC16B	protein_coding	chr1	177909745	177909849	0.0109554408511535	1	*	*	*	*	*	0	0	*	*	*	*	*	0	0	*	*	*	*	*	0	0	chr1-177909838:177910218	chr1	177909838	177910218	chr1
chr1	177903663	177913156	0.07257326007326	-0.222805822640269	0.962962962962963	0.868115942028985	0.197224259527442	0.41684824121824	111	3.19229277688842e-10	HypoLow	chr1	177909850	177911034	Intron16	-	SEC16B	protein_coding	chr1	177909850	177911034	0.124723480459286	1	*	*	*	*	*	0	0	*	*	*	*	*	0	0	*	*	*	*	*	0	0	chr1-177909876:177910076	chr1	177909876	177910076	chr1
chr1	177903663	177913156	0.07257326007326	-0.222805822640269	0.962962962962963	0.868115942028985	0.197224259527442	0.41684824121824	111	3.19229277688842e-10	HypoLow	chr1	177911035	177911175	Exon16	-	SEC16B	protein_coding	chr1	177911035	177911175	0.0147477088380912	1	*	*	*	*	*	0	0	*	*	*	*	*	0	0	chr1-177911040:177911215	chr1	177911040	177911215	chr1	177911040	177911175	*	*	*	*	*
chr1	177903663	177913156	0.07257326007326	-0.222805822640269	0.962962962962963	0.868115942028985	0.197224259527442	0.41684824121824	111	3.19229277688842e-10	HypoLow	chr1	177911176	177913695	Intron15	-	SEC16B	protein_coding	chr1	177911176	177913156	0.208574739281576	0.786026200873362	*	*	*	*	*	0	0	*	*	*	*	*	0	0	chr1-177913080:177913470	chr1	177913080	177913470	chr1	177913080	177913156	chr1-177912540:177912780	chr1	177912540	177912780	chr1
chr1	177903663	177913156	0.07257326007326	-0.222805822640269	0.962962962962963	0.868115942028985	0.197224259527442	0.41684824121824	111	3.19229277688842e-10	HypoLow	chr1	177902772	177905432	Intron25	-	RP4-798P15.3	processed_transcript	chr1	177903663	177905432	0.186347835247024	0.665037593984962	*	*	*	*	*	0	0	*	*	*	*	*	0	0	chr1-177904865:177905175	chr1	177904865	177905175	chr1	177904865	177905175	chr1-177903711:177903906	chr1	177903711	177903906	chr1
chr1	177903663	177913156	0.07257326007326	-0.222805822640269	0.962962962962963	0.868115942028985	0.197224259527442	0.41684824121824	111	3.19229277688842e-10	HypoLow	chr1	177905433	177905500	Exon25	-	RP4-798P15.3	processed_transcript	chr1	177905433	177905500	0.0070578320868008	1	*	*	*	*	*	0	0	*	*	*	*	*	0	0	chr1-177905485:177905955	chr1	177905485	177905955	chr1	177905485	177905500	*	*	*	*	*
chr1	177903663	177913156	0.07257326007326	-0.222805822640269	0.962962962962963	0.868115942028985	0.197224259527442	0.41684824121824	111	3.19229277688842e-10	HypoLow	chr1	177905501	177906348	Intron24	-	RP4-798P15.3	processed_transcript	chr1	177905501	177906348	0.0892236384704519	1	*	*	*	*	*	0	0	*	*	*	*	*	0	0	chr1-177906285:177906435	chr1	177906285	177906435	chr1	177906285	177906348	chr1-177906045:177906449	chr1	177906045	177906449	chr1
chr1	177903663	177913156	0.07257326007326	-0.222805822640269	0.962962962962963	0.868115942028985	0.197224259527442	0.41684824121824	111	3.19229277688842e-10	HypoLow	chr1	177906349	177906648	Exon24	-	RP4-798P15.3	processed_transcript	chr1	177906349	177906648	0.0314968924470663	1	*	*	*	*	*	0	0	*	*	*	*	*	0	0	chr1-177906525:177906850	chr1	177906525	177906850	chr1	177906525	177906648	chr1-177906045:177906449	chr1	177906045	177906449	chr1
chr1	177903663	177913156	0.07257326007326	-0.222805822640269	0.962962962962963	0.868115942028985	0.197224259527442	0.41684824121824	111	3.19229277688842e-10	HypoLow	chr1	177906649	177908836	Intron23	-	RP4-798P15.3	processed_transcript	chr1	177906649	177908836	0.230380280206468	1	*	*	*	*	*	0	0	*	*	*	*	*	0	0	chr1-177908340:177908635	chr1	177908340	177908635	chr1	177908340	177908635	chr1-177907157:177907427	chr1	177907157	177907427	chr1
chr1	177903663	177913156	0.07257326007326	-0.222805822640269	0.962962962962963	0.868115942028985	0.197224259527442	0.41684824121824	111	3.19229277688842e-10	HypoLow	chr1	177908837	177908912	Exon23	-	RP4-798P15.3	processed_transcript	chr1	177908837	177908912	0.0079005583061203	1	*	*	*	*	*	0	0	*	*	*	*	*	0	0	*	*	*	*	*	0	0	*	*	*	*	*
chr1	177903663	177913156	0.07257326007326	-0.222805822640269	0.962962962962963	0.868115942028985	0.197224259527442	0.41684824121824	111	3.19229277688842e-10	HypoLow	chr1	177908913	177909744	Intron22	-	RP4-798P15.3	processed_transcript	chr1	177908913	177909744	0.0875381860318129	1	*	*	*	*	*	0	0	*	*	*	*	*	0	0	chr1-177909045:177909195	chr1	177909045	177909195	chr1	177909045	177909195	*	*	*	*	*
chr1	177903663	177913156	0.07257326007326	-0.222805822640269	0.962962962962963	0.868115942028985	0.197224259527442	0.41684824121824	111	3.19229277688842e-10	HypoLow	chr1	177909745	177909849	Exon22	-	RP4-798P15.3	processed_transcript	chr1	177909745	177909849	0.0109554408511535	1	*	*	*	*	*	0	0	*	*	*	*	*	0	0	*	*	*	*	*	0	0	chr1-177909838:177910218	chr1	177909838	177910218	chr1
chr1	177903663	177913156	0.07257326007326	-0.222805822640269	0.962962962962963	0.868115942028985	0.197224259527442	0.41684824121824	111	3.19229277688842e-10	HypoLow	chr1	177909850	177911034	Intron21	-	RP4-798P15.3	processed_transcript	chr1	177909850	177911034	0.124723480459286	1	*	*	*	*	*	0	0	*	*	*	*	*	0	0	*	*	*	*	*	0	0	chr1-177909876:177910076	chr1	177909876	177910076	chr1
chr1	177903663	177913156	0.07257326007326	-0.222805822640269	0.962962962962963	0.868115942028985	0.197224259527442	0.41684824121824	111	3.19229277688842e-10	HypoLow	chr1	177911035	177911175	Exon21	-	RP4-798P15.3	processed_transcript	chr1	177911035	177911175	0.0147477088380912	1	*	*	*	*	*	0	0	*	*	*	*	*	0	0	chr1-177911040:177911215	chr1	177911040	177911215	chr1	177911040	177911175	*	*	*	*	*
chr1	177903663	177913156	0.07257326007326	-0.222805822640269	0.962962962962963	0.868115942028985	0.197224259527442	0.41684824121824	111	3.19229277688842e-10	HypoLow	chr1	177911176	177913695	Intron20	-	RP4-798P15.3	processed_transcript	chr1	177911176	177913156	0.208574739281576	0.786026200873362	*	*	*	*	*	0	0	*	*	*	*	*	0	0	chr1-177913080:177913470	chr1	177913080	177913470	chr1	177913080	177913156	chr1-177912540:177912780	chr1	177912540	177912780	chr1
chr1	178025520	178028654	0.2	-0.31004165510499	0.944444444444444	0.65	0.301862420566087	0.615479781557005	26	2.14903324502862e-05	-	*	*	*	InterGenic	*	*	*	*	*	*	*	*	*	*	*	*	*	0	0	*	*	*	*	*	0	0	chr1-178027960:178028250	chr1	178027960	178028250	chr1	178027960	178028250	chr1-178028484:178029080	chr1	178028484	178029080	chr1
chr1	178329511	178339696	0.0588235294117651	-0.207072168837942	1	0.9	0.146498995640504	0.365265085000311	68	1.77826552470051e-09	HypoLow	chr1	178269254	178359234	Intron3	+	RASAL2	protein_coding	chr1	178329511	178339696	1	0.113191820404534	*	*	*	*	*	0	0	*	*	*	*	*	0	0	chr1-178334020:178334170	chr1	178334020	178334170	chr1	178334020	178334170	chr1-178335255:178335495	chr1	178335255	178335495	chr1
chr1	178540361	178548789	0.0869565217391309	-0.24862954930742	0.967741935483871	0.88	0.137938950101211	0.408131481801995	56	2.52117719790383e-09	HypoLow	*	*	*	InterGenic	*	*	*	*	*	*	*	*	*	*	*	*	*	0	0	chr1:178548738-178548966	chr1	178548738	178548966	chr1	178548738	178548789	chr1-178547760:178547970	chr1	178547760	178547970	chr1	178547760	178547970	chr1-178548682:178549002	chr1	178548682	178549002	chr1
chr1	178646470	178659887	0.074884792626728	-0.204130432668444	0.966666666666667	0.882352941176471	0.146498995640504	0.346950694324252	80	4.67982158605574e-10	HypoLow	*	*	*	InterGenic	*	*	*	*	*	*	*	*	*	*	*	*	*	0	0	*	*	*	*	*	0	0	chr1-178659700:178659935	chr1	178659700	178659935	chr1	178659700	178659887	chr1-178658346:178658706	chr1	178658346	178658706	chr1
chr1	179555529	179555789	0.405405405405405	0.316271878575062	0.617647058823529	0.173913043478261	0.714937052845239	0.472765278018163	12	0.00199738128156537	HyperHigh	*	*	*	InterGenic	*	*	*	*	*	*	*	*	CpG: 38	chr1	179555401	179555770	chr1	179555529	179555770	chr1:179555221-179555646	chr1	179555221	179555646	chr1	179555529	179555646	chr1-179555220:179556175	chr1	179555220	179556175	chr1	179555529	179555789	chr1-179555598:179556042	chr1	179555598	179556042	chr1
chr1	179787815	179788151	-0.247678018575851	-0.113287632818194	0.137931034482759	0.5	0.425871145606372	0.635213020743189	12	0.00248041647283666	HypoLow	chr1	179787327	179788327	Promoter	-	RP11-12M5.3	antisense	chr1	179787815	179788151	1	0.336	*	*	*	*	*	0	0	*	*	*	*	*	0	0	chr1-179787880:179788395	chr1	179787880	179788395	chr1	179787880	179788151	chr1-179788060:179788516	chr1	179788060	179788516	chr1
chr1	180010532	180011976	0.326702786377709	-0.340441477927941	0.933333333333333	0.601973684210527	0.255280835294371	0.62817426005776	9	0.00188822447789237	HyperLow	chr1	180010384	180010796	Intron18	+	CEP350	protein_coding	chr1	180010532	180010796	0.182825484764543	0.640776699029126	*	*	*	*	*	0	0	*	*	*	*	*	0	0	*	*	*	*	*	0	0	chr1-180010438:180010708	chr1	180010438	180010708	chr1
chr1	180010532	180011976	0.326702786377709	-0.340441477927941	0.933333333333333	0.601973684210527	0.255280835294371	0.62817426005776	9	0.00188822447789237	HyperLow	chr1	180010797	180010937	Exon19	+	CEP350	protein_coding	chr1	180010797	180010937	0.0969529085872576	1	*	*	*	*	*	0	0	*	*	*	*	*	0	0	*	*	*	*	*	0	0	chr1-180010811:180011081	chr1	180010811	180011081	chr1
chr1	180010532	180011976	0.326702786377709	-0.340441477927941	0.933333333333333	0.601973684210527	0.255280835294371	0.62817426005776	9	0.00188822447789237	HyperLow	chr1	180010938	180012190	Intron19	+	CEP350	protein_coding	chr1	180010938	180011976	0.718836565096953	0.829073482428115	*	*	*	*	*	0	0	*	*	*	*	*	0	0	*	*	*	*	*	0	0	chr1-180010811:180011081	chr1	180010811	180011081	chr1
chr1	180155884	180156384	0.396825396825397	-0.080121674966663	0.846153846153846	0.222222222222222	0.478888827305563	0.574802605954197	10	0.00355146480770607	HyperHigh	chr1	180155318	180158686	Intron8	+	QSOX1	protein_coding	chr1	180155884	180156384	1	0.148456057007126	*	*	*	*	*	0	0	*	*	*	*	*	0	0	chr1-180155945:180156270	chr1	180155945	180156270	chr1	180155945	180156270	chr1-180155995:180156265	chr1	180155995	180156265	chr1
chr1	180554502	180554992	-0.44514472455649	-0.143609151235705	0.388888888888889	0.805900621118013	0.353297574789264	0.416810826006478	7	0.00865800865800866	HypoLow	*	*	*	InterGenic	*	*	*	*	*	*	*	*	*	*	*	*	*	0	0	chr1:180554738-180554883	chr1	180554738	180554883	chr1	180554738	180554883	chr1-180554660:180555015	chr1	180554660	180555015	chr1	180554660	180554992	chr1-180554780:180555130	chr1	180554780	180555130	chr1
chr1	181077614	181087377	0.079545454545455	-0.2273261348991	0.956521739130435	0.875	0.181188147733199	0.417209722462608	88	4.64052201857951e-08	HypoLow	*	*	*	InterGenic	*	*	*	*	*	*	*	*	*	*	*	*	*	0	0	chr1:181082184-181082367	chr1	181082184	181082367	chr1	181082184	181082367	chr1-181087300:181087555	chr1	181087300	181087555	chr1	181087300	181087377	chr1-181087157:181087527	chr1	181087157	181087527	chr1
chr1	181351872	181353452	0.105681818181818	-0.215035092527183	0.919871794871795	0.541666666666667	0.28497746851821	0.45674586326186	17	0.100365194007709	HypoLow	*	*	*	InterGenic	*	*	*	*	*	*	*	*	*	*	*	*	*	0	0	*	*	*	*	*	0	0	chr1-181352940:181353170	chr1	181352940	181353170	chr1	181352940	181353170	chr1-181352959:181353203	chr1	181352959	181353203	chr1
chr1	182921883	182922281	0.214271061519638	-0.278615826140355	0.86405529953917	0.65686274509804	0.40394867109902	0.706667717372845	15	0.00109823117648465	HyperLow	chr1	182921864	182922660	FirstExon	-	SHCBP1L	protein_coding	chr1	182921883	182922281	1	0.5	CpG: 79	chr1	182921819	182922644	chr1	182921883	182922281	*	*	*	*	*	0	0	chr1-182921985:182922495	chr1	182921985	182922495	chr1	182921985	182922281	chr1-182922203:182922432	chr1	182922203	182922432	chr1
chr1	182993286	182994112	-0.111568627450981	-0.246160973569831	0.0399686520376176	0.183333333333334	0.143373192869756	0.412670602132302	17	0.00939190480170944	HypoLow	chr1	182993270	183072462	Intron1	+	LAMC1	protein_coding	chr1	182993286	182994112	1	0.0104303464996464	CpG: 149	chr1	182991804	182993370	chr1	182993286	182993370	*	*	*	*	*	0	0	chr1-182993820:182994115	chr1	182993820	182994115	chr1	182993820	182994112	chr1-182993800:182994595	chr1	182993800	182994595	chr1
chr1	183154947	183155572	0.338392857142857	-0.365365211026414	0.953571428571429	0.591666666666667	0.198931144141325	0.617212268583025	21	2.44534860627746e-07	HyperLow	chr1	183154422	183155422	Promoter	+	LAMC2	protein_coding	chr1	183154947	183155422	0.76	0.475	*	*	*	*	*	0	0	*	*	*	*	*	0	0	chr1-183155065:183155575	chr1	183155065	183155575	chr1	183155065	183155422	chr1-183155323:183155703	chr1	183155323	183155703	chr1
chr1	183154947	183155572	0.338392857142857	-0.365365211026414	0.953571428571429	0.591666666666667	0.198931144141325	0.617212268583025	21	2.44534860627746e-07	HyperLow	chr1	183155423	183155566	FirstExon	+	LAMC2	protein_coding	chr1	183155423	183155566	0.2288	1	*	*	*	*	*	0	0	*	*	*	*	*	0	0	chr1-183155065:183155575	chr1	183155065	183155575	chr1	183155423	183155566	chr1-183155323:183155703	chr1	183155323	183155703	chr1
chr1	183154947	183155572	0.338392857142857	-0.365365211026414	0.953571428571429	0.591666666666667	0.198931144141325	0.617212268583025	21	2.44534860627746e-07	HyperLow	chr1	183155567	183177015	Intron1	+	LAMC2	protein_coding	chr1	183155567	183155572	0.008	0.000233121969414398	*	*	*	*	*	0	0	*	*	*	*	*	0	0	chr1-183155065:183155575	chr1	183155065	183155575	chr1	183155567	183155572	chr1-183155323:183155703	chr1	183155323	183155703	chr1
chr1	184064209	184095479	0.0625	-0.208758493247992	0.962962962962963	0.894736842105263	0.130414521209752	0.330421420178476	182	7.33770730400037e-20	HypoLow	*	*	*	InterGenic	*	*	*	*	*	*	*	*	*	*	*	*	*	0	0	*	*	*	*	*	0	0	chr1-184090925:184091210	chr1	184090925	184091210	chr1	184090925	184091210	chr1-184095137:184095667	chr1	184095137	184095667	chr1
chr1	184160387	184160882	0.344968756733463	-0.470562105829234	0.949874686716792	0.569117647058824	0.240642698295787	0.669962989629147	11	0.000321375774933579	HyperLow	*	*	*	InterGenic	*	*	*	*	*	*	*	*	*	*	*	*	*	0	0	*	*	*	*	*	0	0	chr1-184160485:184160710	chr1	184160485	184160710	chr1	184160485	184160710	chr1-184160520:184160776	chr1	184160520	184160776	chr1
chr1	184793148	184804760	0.0570508396595355	-0.202908786132761	1	0.906926406926407	0.134176735655481	0.332621242014154	85	2.54980393771038e-09	HypoLow	chr1	184792877	184800980	Intron6	-	FAM129A	protein_coding	chr1	184793148	184800980	0.674474681364106	0.966555596692583	*	*	*	*	*	0	0	chr1:184794829-184794875	chr1	184794829	184794875	chr1	184794829	184794875	chr1-184798385:184798590	chr1	184798385	184798590	chr1	184798385	184798590	chr1-184798362:184798606	chr1	184798362	184798606	chr1
chr1	184793148	184804760	0.0570508396595355	-0.202908786132761	1	0.906926406926407	0.134176735655481	0.332621242014154	85	2.54980393771038e-09	HypoLow	chr1	184800981	184801096	Exon6	-	FAM129A	protein_coding	chr1	184800981	184801096	0.00990354805373751	1	*	*	*	*	*	0	0	*	*	*	*	*	0	0	*	*	*	*	*	0	0	*	*	*	*	*
chr1	184793148	184804760	0.0570508396595355	-0.202908786132761	1	0.906926406926407	0.134176735655481	0.332621242014154	85	2.54980393771038e-09	HypoLow	chr1	184801097	184853766	Intron5	-	FAM129A	protein_coding	chr1	184801097	184804760	0.315449534963831	0.0695475516907479	*	*	*	*	*	0	0	*	*	*	*	*	0	0	chr1-184801720:184801870	chr1	184801720	184801870	chr1	184801720	184801870	chr1-184803554:184804014	chr1	184803554	184804014	chr1
chr1	184952326	184961706	0.097402597402598	-0.238721212044732	1	0.875	0	0.307309364962454	46	6.82004965299364e-07	HypoLow	*	*	*	InterGenic	*	*	*	*	*	*	*	*	*	*	*	*	*	0	0	*	*	*	*	*	0	0	chr1-184961500:184961730	chr1	184961500	184961730	chr1	184961500	184961706	chr1-184960262:184960638	chr1	184960262	184960638	chr1
chr1	184993571	184998417	0.056521739130435	-0.274539040792576	0.967741935483871	0.9	0.112430022205671	0.363076692947528	28	1.96939423162951e-05	HypoLow	*	*	*	InterGenic	*	*	*	*	*	*	*	*	*	*	*	*	*	0	0	*	*	*	*	*	0	0	*	*	*	*	*	0	0	chr1-184996402:184996762	chr1	184996402	184996762	chr1
chr1	185105368	185110318	0.0669642857142855	-0.301029997943221	1	0.912878787878788	0	0.335682942595652	25	4.50402094986895e-06	HypoLow	chr1	185097880	185106737	Intron10	-	TRMT1L	protein_coding	chr1	185105368	185106737	0.276565656565657	0.154567009145309	*	*	*	*	*	0	0	*	*	*	*	*	0	0	*	*	*	*	*	0	0	*	*	*	*	*
chr1	185105368	185110318	0.0669642857142855	-0.301029997943221	1	0.912878787878788	0	0.335682942595652	25	4.50402094986895e-06	HypoLow	chr1	185106738	185106928	Exon10	-	TRMT1L	protein_coding	chr1	185106738	185106928	0.0383838383838384	1	*	*	*	*	*	0	0	*	*	*	*	*	0	0	*	*	*	*	*	0	0	chr1-185106924:185107528	chr1	185106924	185107528	chr1
chr1	185105368	185110318	0.0669642857142855	-0.301029997943221	1	0.912878787878788	0	0.335682942595652	25	4.50402094986895e-06	HypoLow	chr1	185106929	185108498	Intron9	-	TRMT1L	protein_coding	chr1	185106929	185108498	0.316969696969697	1	*	*	*	*	*	0	0	*	*	*	*	*	0	0	chr1-185108445:185108630	chr1	185108445	185108630	chr1	185108445	185108498	chr1-185108265:185108869	chr1	185108265	185108869	chr1
chr1	185105368	185110318	0.0669642857142855	-0.301029997943221	1	0.912878787878788	0	0.335682942595652	25	4.50402094986895e-06	HypoLow	chr1	185108499	185108711	Exon9	-	TRMT1L	protein_coding	chr1	185108499	185108711	0.0428282828282828	1	*	*	*	*	*	0	0	*	*	*	*	*	0	0	chr1-185108685:185108835	chr1	185108685	185108835	chr1	185108685	185108711	chr1-185108265:185108869	chr1	185108265	185108869	chr1
chr1	185105368	185110318	0.0669642857142855	-0.301029997943221	1	0.912878787878788	0	0.335682942595652	25	4.50402094986895e-06	HypoLow	chr1	185108712	185109104	Intron8	-	TRMT1L	protein_coding	chr1	185108712	185109104	0.0791919191919192	1	*	*	*	*	*	0	0	*	*	*	*	*	0	0	chr1-185108685:185108835	chr1	185108685	185108835	chr1	185108712	185108835	chr1-185109015:185109499	chr1	185109015	185109499	chr1
chr1	185105368	185110318	0.0669642857142855	-0.301029997943221	1	0.912878787878788	0	0.335682942595652	25	4.50402094986895e-06	HypoLow	chr1	185109105	185109354	Exon8	-	TRMT1L	protein_coding	chr1	185109105	185109354	0.0503030303030303	1	*	*	*	*	*	0	0	*	*	*	*	*	0	0	*	*	*	*	*	0	0	chr1-185109015:185109499	chr1	185109015	185109499	chr1
chr1	185105368	185110318	0.0669642857142855	-0.301029997943221	1	0.912878787878788	0	0.335682942595652	25	4.50402094986895e-06	HypoLow	chr1	185109355	185112488	Intron7	-	TRMT1L	protein_coding	chr1	185109355	185110318	0.194545454545455	0.307373124800511	*	*	*	*	*	0	0	chr1:185109809-185110137	chr1	185109809	185110137	chr1	185109809	185110137	*	*	*	*	*	0	0	chr1-185109015:185109499	chr1	185109015	185109499	chr1
chr1	186574907	186582889	0.056521739130435	-0.200535581913156	1	0.916666666666667	0.103181143050108	0.288618872485741	48	1.41755731003322e-05	HypoLow	*	*	*	InterGenic	*	*	*	*	*	*	*	*	*	*	*	*	*	0	0	chr1:186580348-186580617	chr1	186580348	186580617	chr1	186580348	186580617	chr1-186580380:186580530	chr1	186580380	186580530	chr1	186580380	186580530	chr1-186580859:186581269	chr1	186580859	186581269	chr1
chr1	187068274	187084360	0.041666666666667	-0.209126492801461	0.961538461538462	0.88	0.181188147733199	0.41296708553421	80	3.68122054361889e-06	HypoLow	chr1	187062079	187272597	Intron1	+	LINC01036	lincRNA	chr1	187068274	187084360	1	0.0764115182549711	*	*	*	*	*	0	0	*	*	*	*	*	0	0	chr1-187079205:187079355	chr1	187079205	187079355	chr1	187079205	187079355	chr1-187084054:187084284	chr1	187084054	187084284	chr1
chr1	188343685	188378529	0.0830745341614905	-0.200516168154792	0.963624338624338	0.868115942028985	0.158529130631926	0.402506249879807	141	3.886807786498e-15	HypoLow	*	*	*	InterGenic	*	*	*	*	*	*	*	*	*	*	*	*	*	0	0	*	*	*	*	*	0	0	chr1-188378360:188378510	chr1	188378360	188378510	chr1	188378360	188378510	chr1-188378094:188378504	chr1	188378094	188378504	chr1
chr1	188571530	188574501	0.119934640522876	-0.254892533102764	0.98	0.840336134453781	0.179522256554706	0.394917476631262	15	0.000827555868853366	HypoLow	*	*	*	InterGenic	*	*	*	*	*	*	*	*	*	*	*	*	*	0	0	*	*	*	*	*	0	0	*	*	*	*	*	0	0	*	*	*	*	*
chr1	188574871	188578714	-0.208950469820035	0.302422743205797	0.761111111111111	0.930952380952381	0.603939549792462	0.262580438494626	19	0.0131774483084588	HypoHigh	*	*	*	InterGenic	*	*	*	*	*	*	*	*	*	*	*	*	*	0	0	*	*	*	*	*	0	0	*	*	*	*	*	0	0	*	*	*	*	*
chr1	188585663	188590058	-0.072900432900433	0.288750472839007	0.917366946778712	0.970588235294118	0.396304572437792	0.073249497820252	17	0.0799742184607898	HypoHigh	*	*	*	InterGenic	*	*	*	*	*	*	*	*	*	*	*	*	*	0	0	*	*	*	*	*	0	0	chr1-188588940:188589090	chr1	188588940	188589090	chr1	188588940	188589090	chr1-188589375:188589651	chr1	188589375	188589651	chr1
chr1	188625111	188634075	0.0946969696969691	-0.305466019173854	1	0.863636363636364	0.123744108880292	0.374037892369703	30	0.000292748211412934	HypoLow	*	*	*	InterGenic	*	*	*	*	*	*	*	*	*	*	*	*	*	0	0	*	*	*	*	*	0	0	chr1-188629680:188629870	chr1	188629680	188629870	chr1	188629680	188629870	*	*	*	*	*
chr1	189166492	189176546	-0.0889328063241105	0.201295878915649	0.715909090909091	0.897368421052632	0.503875851358917	0.320919015784147	35	0.0829978319689395	HypoHigh	*	*	*	InterGenic	*	*	*	*	*	*	*	*	*	*	*	*	*	0	0	chr1:189173561-189173583	chr1	189173561	189173583	chr1	189173561	189173583	chr1-189175200:189175350	chr1	189175200	189175350	chr1	189175200	189175350	chr1-189176241:189176525	chr1	189176241	189176525	chr1
chr1	189479286	189482438	-0.393106893106894	0.188820102516262	0.309090909090909	0.804166666666666	0.514429449048918	0.356685946419101	11	0.0185433761285154	HypoHigh	*	*	*	InterGenic	*	*	*	*	*	*	*	*	*	*	*	*	*	0	0	*	*	*	*	*	0	0	chr1-189482385:189482675	chr1	189482385	189482675	chr1	189482385	189482438	chr1-189482254:189482514	chr1	189482254	189482514	chr1
chr1	190996833	191026146	0.0755760368663591	-0.237360807301416	0.958333333333333	0.869565217391304	0.222854814399865	0.402506249879807	122	6.37385028300401e-14	HypoLow	*	*	*	InterGenic	*	*	*	*	*	*	*	*	*	*	*	*	*	0	0	*	*	*	*	*	0	0	chr1-191024280:191024430	chr1	191024280	191024430	chr1	191024280	191024430	chr1-191002405:191002830	chr1	191002405	191002830	chr1
chr1	191431662	191461015	0.0656217750257995	-0.230957214318265	0.961538461538462	0.891812865497076	0.167752778258549	0.42154043403449	127	3.85595152151761e-13	HypoLow	*	*	*	InterGenic	*	*	*	*	*	*	*	*	*	*	*	*	*	0	0	*	*	*	*	*	0	0	chr1-191455640:191455850	chr1	191455640	191455850	chr1	191455640	191455850	chr1-191455994:191456264	chr1	191455994	191456264	chr1
chr1	191482917	191518004	0.085521778584392	-0.205776021679108	0.966091954022989	0.88	0.142218972870857	0.363076692947528	147	9.3961417425046e-19	HypoLow	*	*	*	InterGenic	*	*	*	*	*	*	*	*	*	*	*	*	*	0	0	*	*	*	*	*	0	0	chr1-191516020:191516170	chr1	191516020	191516170	chr1	191516020	191516170	chr1-191512571:191512901	chr1	191512571	191512901	chr1
chr1	192130378	192132641	0.194444444444444	-0.215146474196656	0.952380952380952	0.8	0.259783279097362	0.45698353148489	12	0.0036157702501508	HypoLow	chr1	192129570	192150421	Intron3	+	RGS18	protein_coding	chr1	192130378	192132641	1	0.10853196489377	*	*	*	*	*	0	0	*	*	*	*	*	0	0	chr1-192132085:192132235	chr1	192132085	192132235	chr1	192132085	192132235	chr1-192132311:192132761	chr1	192132311	192132761	chr1
chr1	192157157	192173400	0.077231591937474	-0.240642698295787	1	0.891812865497076	0	0.334807905429861	61	1.61826633044233e-10	HypoLow	*	*	*	InterGenic	*	*	*	*	*	*	*	*	*	*	*	*	*	0	0	*	*	*	*	*	0	0	chr1-192170500:192170750	chr1	192170500	192170750	chr1	192170500	192170750	chr1-192172338:192172626	chr1	192172338	192172626	chr1
chr1	192202559	192224594	0.070270415858651	-0.206460731559588	1	0.896551724137931	0	0.317547308311508	85	1.11500034097468e-14	HypoLow	*	*	*	InterGenic	*	*	*	*	*	*	*	*	*	*	*	*	*	0	0	chr1:192216449-192216576	chr1	192216449	192216576	chr1	192216449	192216576	chr1-192223085:192223235	chr1	192223085	192223235	chr1	192223085	192223235	chr1-192223550:192223980	chr1	192223550	192223980	chr1
chr1	192336230	192361457	0.076114081996435	-0.201576885231251	0.958333333333333	0.875	0.215038142501471	0.405318865840901	111	6.40307819985492e-13	HypoLow	chr1	192335051	192336415	LastExon	+	RGS21	protein_coding	chr1	192336230	192336415	0.0073334126134697	0.135630498533724	*	*	*	*	*	0	0	*	*	*	*	*	0	0	*	*	*	*	*	0	0	*	*	*	*	*
chr1	192837596	192845102	0.0909090909090911	-0.229573958513622	1	0.866666666666667	0.146498995640504	0.431820614746107	40	4.35476927834851e-06	HypoLow	*	*	*	InterGenic	*	*	*	*	*	*	*	*	*	*	*	*	*	0	0	*	*	*	*	*	0	0	chr1-192844700:192844935	chr1	192844700	192844935	chr1	192844700	192844935	chr1-192843043:192843303	chr1	192843043	192843303	chr1
chr1	192944240	192946853	0.16551724137931	-0.216340833189102	0.96	0.758620689655172	0.233280946628746	0.518203253755189	22	0.00110922013106378	HypoLow	*	*	*	InterGenic	*	*	*	*	*	*	*	*	*	*	*	*	*	0	0	*	*	*	*	*	0	0	chr1-192946265:192946750	chr1	192946265	192946750	chr1	192946265	192946750	chr1-192946605:192946792	chr1	192946605	192946792	chr1
chr1	193735312	193746183	0.0777777777777781	-0.229261351952586	0.966666666666667	0.888888888888889	0.092065142549313	0.307309364962454	42	2.21507059301149e-06	HypoLow	*	*	*	InterGenic	*	*	*	*	*	*	*	*	*	*	*	*	*	0	0	*	*	*	*	*	0	0	chr1-193739920:193740070	chr1	193739920	193740070	chr1	193739920	193740070	chr1-193743734:193743977	chr1	193743734	193743977	chr1
chr1	193763800	193776729	0.08695652173913	-0.231581685949044	1	0.884615384615385	0.167752778258549	0.43056399904602	54	4.74749857045638e-09	HypoLow	*	*	*	InterGenic	*	*	*	*	*	*	*	*	*	*	*	*	*	0	0	*	*	*	*	*	0	0	chr1-193771245:193771435	chr1	193771245	193771435	chr1	193771245	193771435	chr1-193769140:193769520	chr1	193769140	193769520	chr1
chr1	194222760	194226348	0.1475	-0.272229696105007	0.96	0.823529411764706	0.130414521209752	0.417209722462608	14	0.000191883892115405	HypoLow	*	*	*	InterGenic	*	*	*	*	*	*	*	*	*	*	*	*	*	0	0	*	*	*	*	*	0	0	*	*	*	*	*	0	0	chr1-194225306:194225696	chr1	194225306	194225696	chr1
chr1	194577006	194585489	0.133333333333333	-0.270514929221301	0.958333333333333	0.789473684210526	0.197224259527442	0.486382639009082	54	4.8022954745005e-09	HypoLow	*	*	*	InterGenic	*	*	*	*	*	*	*	*	*	*	*	*	*	0	0	*	*	*	*	*	0	0	chr1-194579585:194579775	chr1	194579585	194579775	chr1	194579585	194579775	chr1-194584368:194584778	chr1	194584368	194584778	chr1
chr1	194585794	194586192	-0.888888888888889	-0.216674140549451	0	0.888888888888889	0.206460731559588	0.365265085000311	10	0.000445623691816081	HypoLow	*	*	*	InterGenic	*	*	*	*	*	*	*	*	*	*	*	*	*	0	0	*	*	*	*	*	0	0	chr1-194586040:194586190	chr1	194586040	194586190	chr1	194586040	194586190	*	*	*	*	*
chr1	194613719	194626525	0.263157894736842	-0.315916737945601	0.961538461538462	0.714285714285714	0.15633186452976	0.507213545447773	62	3.19580106194145e-16	HyperLow	*	*	*	InterGenic	*	*	*	*	*	*	*	*	*	*	*	*	*	0	0	*	*	*	*	*	0	0	chr1-194626500:194626690	chr1	194626500	194626690	chr1	194626500	194626525	chr1-194626518:194627485	chr1	194626518	194627485	chr1
chr1	194685252	194708191	0.115384615384615	-0.324255092672721	1	0.85	0.137938950101211	0.482938545241728	102	2.24450662358487e-14	HypoLow	*	*	*	InterGenic	*	*	*	*	*	*	*	*	*	*	*	*	*	0	0	*	*	*	*	*	0	0	chr1-194707040:194707190	chr1	194707040	194707190	chr1	194707040	194707190	chr1-194707947:194708403	chr1	194707947	194708403	chr1
chr1	194867465	194901330	0.081521739130435	-0.240642698295787	0.962962962962963	0.875	0.137938950101211	0.440726448505556	144	3.40705255421088e-15	HypoLow	*	*	*	InterGenic	*	*	*	*	*	*	*	*	*	*	*	*	*	0	0	*	*	*	*	*	0	0	chr1-194900480:194900650	chr1	194900480	194900650	chr1	194900480	194900650	chr1-194900697:194900921	chr1	194900697	194900921	chr1
chr1	194901430	194954554	0.138621794871794	-0.245430442190335	0.956521739130435	0.785714285714286	0.269058308630539	0.512847770175404	225	4.97515748592103e-25	HypoLow	*	*	*	InterGenic	*	*	*	*	*	*	*	*	*	*	*	*	*	0	0	*	*	*	*	*	0	0	chr1-194948540:194948850	chr1	194948540	194948850	chr1	194948540	194948850	chr1-194945169:194945318	chr1	194945169	194945318	chr1
chr1	194981045	194983267	-0.0595238095238097	-0.214234640671305	0.375	0.563492063492063	0.352735542530816	0.477186761427772	13	0.582127283215808	HypoLow	*	*	*	InterGenic	*	*	*	*	*	*	*	*	*	*	*	*	*	0	0	*	*	*	*	*	0	0	chr1-194981405:194981555	chr1	194981405	194981555	chr1	194981405	194981555	chr1-194981820:194982220	chr1	194981820	194982220	chr1
chr1	195215711	195218296	0.085714285714285	-0.206318837515295	1	0.866666666666667	0.130414521209752	0.385593216482346	18	1.00287943123778e-05	HypoLow	*	*	*	InterGenic	*	*	*	*	*	*	*	*	*	*	*	*	*	0	0	*	*	*	*	*	0	0	*	*	*	*	*	0	0	chr1-195217312:195218136	chr1	195217312	195218136	chr1
chr1	196558511	196575274	0.087121212121212	-0.247145615611631	0.958333333333333	0.85	0.209095979874538	0.454621707316952	79	2.88299815787196e-09	HypoLow	chr1	196461472	196577344	Intron1	-	KCNT2	protein_coding	chr1	196558511	196575274	1	0.144668254625794	*	*	*	*	*	0	0	*	*	*	*	*	0	0	chr1-196573925:196574195	chr1	196573925	196574195	chr1	196573925	196574195	chr1-196574422:196574766	chr1	196574422	196574766	chr1
chr1	198589653	198607547	0.0785714285714291	-0.24484330714649	1	0.875	0.167752778258549	0.367769136202611	86	2.86730970294632e-08	HypoLow	chr1	198607169	198608169	Promoter	+	PTPRC	protein_coding	chr1	198607169	198607547	0.0211243992399687	0.378	*	*	*	*	*	0	0	*	*	*	*	*	0	0	chr1-198607420:198607890	chr1	198607420	198607890	chr1	198607420	198607547	chr1-198607404:198607740	chr1	198607404	198607740	chr1
chr1	198668710	198686838	0.0909090909090911	-0.217690669122386	1	0.894736842105263	0.127079315045022	0.358418033883619	107	4.57799104819157e-16	HypoLow	chr1	198668693	198668833	Exon5	+	PTPRC	protein_coding	chr1	198668710	198668833	0.00678508384819064	0.878571428571429	*	*	*	*	*	0	0	*	*	*	*	*	0	0	chr1-198668560:198668870	chr1	198668560	198668870	chr1	198668710	198668833	chr1-198668600:198668890	chr1	198668600	198668890	chr1
chr1	198668710	198686838	0.0909090909090911	-0.217690669122386	1	0.894736842105263	0.127079315045022	0.358418033883619	107	4.57799104819157e-16	HypoLow	chr1	198668834	198671515	Intron5	+	PTPRC	protein_coding	chr1	198668834	198671515	0.147892762577229	1	*	*	*	*	*	0	0	*	*	*	*	*	0	0	chr1-198670940:198671190	chr1	198670940	198671190	chr1	198670940	198671190	chr1-198671295:198671699	chr1	198671295	198671699	chr1
chr1	198668710	198686838	0.0909090909090911	-0.217690669122386	1	0.894736842105263	0.127079315045022	0.358418033883619	107	4.57799104819157e-16	HypoLow	chr1	198671516	198671659	Exon6	+	PTPRC	protein_coding	chr1	198671516	198671659	0.00788834951456311	1	*	*	*	*	*	0	0	*	*	*	*	*	0	0	*	*	*	*	*	0	0	chr1-198671295:198671699	chr1	198671295	198671699	chr1
chr1	198668710	198686838	0.0909090909090911	-0.217690669122386	1	0.894736842105263	0.127079315045022	0.358418033883619	107	4.57799104819157e-16	HypoLow	chr1	198671660	198672426	Intron6	+	PTPRC	protein_coding	chr1	198671660	198672426	0.0422550750220653	1	*	*	*	*	*	0	0	*	*	*	*	*	0	0	*	*	*	*	*	0	0	chr1-198671295:198671699	chr1	198671295	198671699	chr1
chr1	198668710	198686838	0.0909090909090911	-0.217690669122386	1	0.894736842105263	0.127079315045022	0.358418033883619	107	4.57799104819157e-16	HypoLow	chr1	198672427	198672501	Exon7	+	PTPRC	protein_coding	chr1	198672427	198672501	0.00408208296557811	1	*	*	*	*	*	0	0	*	*	*	*	*	0	0	*	*	*	*	*	0	0	*	*	*	*	*
chr1	198668710	198686838	0.0909090909090911	-0.217690669122386	1	0.894736842105263	0.127079315045022	0.358418033883619	107	4.57799104819157e-16	HypoLow	chr1	198672502	198673600	Intron7	+	PTPRC	protein_coding	chr1	198672502	198673600	0.0605692850838482	1	*	*	*	*	*	0	0	*	*	*	*	*	0	0	*	*	*	*	*	0	0	*	*	*	*	*
chr1	198668710	198686838	0.0909090909090911	-0.217690669122386	1	0.894736842105263	0.127079315045022	0.358418033883619	107	4.57799104819157e-16	HypoLow	chr1	198673601	198673627	Exon8	+	PTPRC	protein_coding	chr1	198673601	198673627	0.0014342453662842	1	*	*	*	*	*	0	0	*	*	*	*	*	0	0	*	*	*	*	*	0	0	*	*	*	*	*
chr1	198668710	198686838	0.0909090909090911	-0.217690669122386	1	0.894736842105263	0.127079315045022	0.358418033883619	107	4.57799104819157e-16	HypoLow	chr1	198673628	198675862	Intron8	+	PTPRC	protein_coding	chr1	198673628	198675862	0.123234774933804	1	*	*	*	*	*	0	0	*	*	*	*	*	0	0	*	*	*	*	*	0	0	chr1-198675176:198675392	chr1	198675176	198675392	chr1
chr1	198668710	198686838	0.0909090909090911	-0.217690669122386	1	0.894736842105263	0.127079315045022	0.358418033883619	107	4.57799104819157e-16	HypoLow	chr1	198675863	198676081	Exon9	+	PTPRC	protein_coding	chr1	198675863	198676081	0.0120255957634598	1	*	*	*	*	*	0	0	*	*	*	*	*	0	0	*	*	*	*	*	0	0	*	*	*	*	*
chr1	198668710	198686838	0.0909090909090911	-0.217690669122386	1	0.894736842105263	0.127079315045022	0.358418033883619	107	4.57799104819157e-16	HypoLow	chr1	198676082	198677261	Intron9	+	PTPRC	protein_coding	chr1	198676082	198677261	0.0650375110326567	1	*	*	*	*	*	0	0	*	*	*	*	*	0	0	chr1-198677140:198677290	chr1	198677140	198677290	chr1	198677140	198677261	*	*	*	*	*
chr1	198668710	198686838	0.0909090909090911	-0.217690669122386	1	0.894736842105263	0.127079315045022	0.358418033883619	107	4.57799104819157e-16	HypoLow	chr1	198677262	198677390	Exon10	+	PTPRC	protein_coding	chr1	198677262	198677390	0.00706090026478376	1	*	*	*	*	*	0	0	*	*	*	*	*	0	0	chr1-198677140:198677290	chr1	198677140	198677290	chr1	198677262	198677290	*	*	*	*	*
chr1	198668710	198686838	0.0909090909090911	-0.217690669122386	1	0.894736842105263	0.127079315045022	0.358418033883619	107	4.57799104819157e-16	HypoLow	chr1	198677391	198678815	Intron10	+	PTPRC	protein_coding	chr1	198677391	198678815	0.0785525154457193	1	*	*	*	*	*	0	0	*	*	*	*	*	0	0	chr1-198678380:198678530	chr1	198678380	198678530	chr1	198678380	198678530	chr1-198678228:198678638	chr1	198678228	198678638	chr1
chr1	198668710	198686838	0.0909090909090911	-0.217690669122386	1	0.894736842105263	0.127079315045022	0.358418033883619	107	4.57799104819157e-16	HypoLow	chr1	198678816	198678953	Exon11	+	PTPRC	protein_coding	chr1	198678816	198678953	0.00755736981465137	1	*	*	*	*	*	0	0	*	*	*	*	*	0	0	*	*	*	*	*	0	0	*	*	*	*	*
chr1	198668710	198686838	0.0909090909090911	-0.217690669122386	1	0.894736842105263	0.127079315045022	0.358418033883619	107	4.57799104819157e-16	HypoLow	chr1	198678954	198682081	Intron11	+	PTPRC	protein_coding	chr1	198678954	198682081	0.172495586937335	1	*	*	*	*	*	0	0	*	*	*	*	*	0	0	chr1-198681060:198681250	chr1	198681060	198681250	chr1	198681060	198681250	*	*	*	*	*
chr1	198668710	198686838	0.0909090909090911	-0.217690669122386	1	0.894736842105263	0.127079315045022	0.358418033883619	107	4.57799104819157e-16	HypoLow	chr1	198682082	198682201	Exon12	+	PTPRC	protein_coding	chr1	198682082	198682201	0.00656443071491615	1	*	*	*	*	*	0	0	*	*	*	*	*	0	0	*	*	*	*	*	0	0	*	*	*	*	*
chr1	198668710	198686838	0.0909090909090911	-0.217690669122386	1	0.894736842105263	0.127079315045022	0.358418033883619	107	4.57799104819157e-16	HypoLow	chr1	198682202	198685810	Intron12	+	PTPRC	protein_coding	chr1	198682202	198685810	0.199029126213592	1	*	*	*	*	*	0	0	*	*	*	*	*	0	0	chr1-198682280:198682610	chr1	198682280	198682610	chr1	198682280	198682610	chr1-198684245:198684528	chr1	198684245	198684528	chr1
chr1	198668710	198686838	0.0909090909090911	-0.217690669122386	1	0.894736842105263	0.127079315045022	0.358418033883619	107	4.57799104819157e-16	HypoLow	chr1	198685811	198685969	Exon13	+	PTPRC	protein_coding	chr1	198685811	198685969	0.00871579876434245	1	*	*	*	*	*	0	0	*	*	*	*	*	0	0	*	*	*	*	*	0	0	*	*	*	*	*
chr1	198668710	198686838	0.0909090909090911	-0.217690669122386	1	0.894736842105263	0.127079315045022	0.358418033883619	107	4.57799104819157e-16	HypoLow	chr1	198685970	198687222	Intron13	+	PTPRC	protein_coding	chr1	198685970	198686838	0.0478817299205649	0.693290734824281	*	*	*	*	*	0	0	*	*	*	*	*	0	0	*	*	*	*	*	0	0	chr1-198686718:198687007	chr1	198686718	198687007	chr1
chr1	198953471	198965248	0.076923076923077	-0.204789815295586	0.964285714285714	0.904761904761905	0.137938950101211	0.365265085000311	56	3.57247026938781e-06	HypoLow	chr1	198953159	198953797	Intron2	+	RP11-16L9.2	lincRNA	chr1	198953471	198953797	0.027681073278424	0.510971786833856	*	*	*	*	*	0	0	*	*	*	*	*	0	0	chr1-198953725:198953875	chr1	198953725	198953875	chr1	198953725	198953797	chr1-198953265:198953521	chr1	198953265	198953521	chr1
chr1	198953471	198965248	0.076923076923077	-0.204789815295586	0.964285714285714	0.904761904761905	0.137938950101211	0.365265085000311	56	3.57247026938781e-06	HypoLow	chr1	198953798	198954529	LastExon	+	RP11-16L9.2	lincRNA	chr1	198953798	198954529	0.062070136707141	1	*	*	*	*	*	0	0	*	*	*	*	*	0	0	chr1-198954260:198954415	chr1	198954260	198954415	chr1	198954260	198954415	*	*	*	*	*
chr1	199134864	199153654	0.066666666666667	-0.215192173168423	1	0.923076923076923	0.130414521209752	0.328808909576947	84	1.75272860547173e-08	HypoLow	chr1	199131699	199360448	Intron3	+	RP11-382E9.1	lincRNA	chr1	199134864	199153654	1	0.0821424355953469	*	*	*	*	*	0	0	chr1:199151722-199151828	chr1	199151722	199151828	chr1	199151722	199151828	chr1-199151660:199151850	chr1	199151660	199151850	chr1	199151660	199151850	chr1-199153435:199153651	chr1	199153435	199153651	chr1
chr1	199415803	199458669	0.0771520146520145	-0.214369815223648	1	0.890873015873016	0.130414521209752	0.382944951426972	193	4.21095344042308e-21	HypoLow	*	*	*	InterGenic	*	*	*	*	*	*	*	*	*	*	*	*	*	0	0	chr1:199436119-199436458	chr1	199436119	199436458	chr1	199436119	199436458	chr1-199456020:199456170	chr1	199456020	199456170	chr1	199456020	199456170	chr1-199451950:199452190	chr1	199451950	199452190	chr1
chr1	200009765	200010886	0.0746160533178785	0.200795613588276	0.523326572008113	0.272727272727273	0.601958766747214	0.314874404751527	31	0.202652910780307	HypoHigh	chr1	200008924	200012901	Intron2	+	NR5A2	protein_coding	chr1	200009765	200010886	1	0.281870756851898	CpG: 16	chr1	200010625	200010832	chr1	200010625	200010832	*	*	*	*	*	0	0	chr1-200010465:200011515	chr1	200010465	200011515	chr1	200010465	200010886	chr1-200010872:200011152	chr1	200010872	200011152	chr1
chr1	200232474	200243596	0.071428571428571	-0.216674140549451	1	0.904761904761905	0.123744108880292	0.350993858376756	70	8.24985332040284e-10	HypoLow	*	*	*	InterGenic	*	*	*	*	*	*	*	*	*	*	*	*	*	0	0	*	*	*	*	*	0	0	chr1-200243425:200243575	chr1	200243425	200243575	chr1	200243425	200243575	chr1-200243543:200244093	chr1	200243543	200244093	chr1
chr1	200494220	200496154	0.071111111111111	0.204789815295586	0.56	0.5625	0.486382639009082	0.216674140549451	20	0.160834995399321	HypoHigh	*	*	*	InterGenic	*	*	*	*	*	*	*	*	*	*	*	*	*	0	0	*	*	*	*	*	0	0	chr1-200496000:200496335	chr1	200496000	200496335	chr1	200496000	200496154	chr1-200496042:200496362	chr1	200496042	200496362	chr1
chr1	200496851	200499187	0.089285714285714	-0.295240646525914	1	0.894444444444444	0.127862697554176	0.42154043403449	25	1.61601603541427e-05	HypoLow	*	*	*	InterGenic	*	*	*	*	*	*	*	*	*	*	*	*	*	0	0	*	*	*	*	*	0	0	chr1-200498660:200498935	chr1	200498660	200498935	chr1	200498660	200498935	chr1-200498279:200498434	chr1	200498279	200498434	chr1
chr1	201031620	201032177	-0.279581529581529	0.022130279121326	0.379699248120301	0.779352226720648	0.606600635276306	0.55976201393497	9	0.0498834498834499	HypoHigh	chr1	201031590	201031642	Exon23	-	CACNA1S	protein_coding	chr1	201031620	201031642	0.0394973070017953	0.423076923076923	*	*	*	*	*	0	0	*	*	*	*	*	0	0	chr1-201031165:201031810	chr1	201031165	201031810	chr1	201031620	201031642	chr1-201031608:201031720	chr1	201031608	201031720	chr1
chr1	201031620	201032177	-0.279581529581529	0.022130279121326	0.379699248120301	0.779352226720648	0.606600635276306	0.55976201393497	9	0.0498834498834499	HypoHigh	chr1	201031643	201034965	Intron22	-	CACNA1S	protein_coding	chr1	201031643	201032177	0.958707360861759	0.160746538229982	*	*	*	*	*	0	0	chr1:201032066-201032442	chr1	201032066	201032442	chr1	201032066	201032177	chr1-201031845:201032170	chr1	201031845	201032170	chr1	201031845	201032170	chr1-201031608:201031720	chr1	201031608	201031720	chr1
chr1	201228249	201229925	0.166666666666667	0.328808909576947	0.523809523809524	0.111111111111111	0.566813239380364	0.240642698295787	28	0.00454242529805097	HypoHigh	*	*	*	InterGenic	*	*	*	*	*	*	*	*	*	*	*	*	*	0	0	*	*	*	*	*	0	0	chr1-201228585:201229690	chr1	201228585	201229690	chr1	201228585	201229690	chr1-201229848:201230465	chr1	201229848	201230465	chr1
chr1	201252933	201253375	0.263095238095238	-0.38391219762887	0.967741935483871	0.545454545454545	0.381051959488611	0.640642698295787	20	0.000408250281267797	HyperLow	chr1	201252580	201253032	FirstExon	+	PKP1	protein_coding	chr1	201252933	201253032	0.223981900452489	0.219026548672566	CpG: 98	chr1	201252452	201253648	chr1	201252933	201253032	*	*	*	*	*	0	0	*	*	*	*	*	0	0	chr1-201252652:201252972	chr1	201252652	201252972	chr1
chr1	201252933	201253375	0.263095238095238	-0.38391219762887	0.967741935483871	0.545454545454545	0.381051959488611	0.640642698295787	20	0.000408250281267797	HyperLow	chr1	201253033	201263069	Intron1	+	PKP1	protein_coding	chr1	201253033	201253375	0.773755656108597	0.0340773216420885	CpG: 98	chr1	201252452	201253648	chr1	201253033	201253375	*	*	*	*	*	0	0	chr1-201253120:201253535	chr1	201253120	201253535	chr1	201253120	201253375	chr1-201252395:201253299	chr1	201252395	201253299	chr1
chr1	202183870	202187874	0.0814393939393945	-0.22382153740892	0.953463203463204	0.849624060150376	0.234327755087734	0.434734802805811	39	0.000945565626536927	HypoLow	chr1	202163330	202194550	Intron1	+	LGR6	protein_coding	chr1	202183870	202187874	1	0.128251121076233	*	*	*	*	*	0	0	*	*	*	*	*	0	0	chr1-202186720:202187175	chr1	202186720	202187175	chr1	202186720	202187175	chr1-202186560:202187044	chr1	202186560	202187044	chr1
chr1	202598957	202600496	0.0903263403263405	-0.213779211079554	0.951190476190476	0.777472527472528	0.303980515958792	0.455071268106594	21	0.0136039540867953	HypoLow	chr1	202574918	202679385	Intron1	-	SYT2	protein_coding	chr1	202598957	202600496	1	0.0147319249140877	*	*	*	*	*	0	0	*	*	*	*	*	0	0	chr1-202600000:202600610	chr1	202600000	202600610	chr1	202600000	202600496	chr1-202599940:202600320	chr1	202599940	202600320	chr1
chr1	202620267	202624683	-0.063508064516129	0.21075785407017	0.836021505376344	0.930952380952381	0.417118405081029	0.218933478911614	49	0.0134472109284759	HypoHigh	chr1	202574918	202679385	Intron1	-	SYT2	protein_coding	chr1	202620267	202624683	1	0.0422717221706376	*	*	*	*	*	0	0	*	*	*	*	*	0	0	chr1-202624425:202624575	chr1	202624425	202624575	chr1	202624425	202624575	chr1-202624065:202624665	chr1	202624065	202624665	chr1
chr1	202803870	202804362	-0.288461538461538	0.00789479208734201	0.25	0.636363636363636	0.473185432857204	0.520426041486377	8	0.0179598323777853	HypoHigh	*	*	*	InterGenic	*	*	*	*	*	*	*	*	*	*	*	*	*	0	0	*	*	*	*	*	0	0	chr1-202803960:202804250	chr1	202803960	202804250	chr1	202803960	202804250	chr1-202804074:202804550	chr1	202804074	202804550	chr1
chr1	202974364	202975220	0.25	-0.35407701098802	0.958333333333333	0.714285714285714	0.216674140549451	0.561938569717677	16	4.28902532563644e-05	HyperLow	*	*	*	InterGenic	*	*	*	*	*	*	*	*	*	*	*	*	*	0	0	*	*	*	*	*	0	0	chr1-202974820:202975070	chr1	202974820	202975070	chr1	202974820	202975070	chr1-202975215:202975579	chr1	202975215	202975579	chr1
chr1	203239061	203242006	0.117776959882223	-0.215602266180814	0.95048309178744	0.775252525252526	0.178995086838367	0.446263072363596	27	4.41093044204173e-05	HypoLow	chr1	203237646	203241937	FirstExon	-	CHIT1	protein_coding	chr1	203239061	203241937	0.976570458404075	0.670240037287346	*	*	*	*	*	0	0	*	*	*	*	*	0	0	chr1-203241665:203241835	chr1	203241665	203241835	chr1	203241665	203241835	chr1-203241913:203242621	chr1	203241913	203242621	chr1
chr1	203239061	203242006	0.117776959882223	-0.215602266180814	0.95048309178744	0.775252525252526	0.178995086838367	0.446263072363596	27	4.41093044204173e-05	HypoLow	chr1	203241938	203242938	Promoter	-	CHIT1	protein_coding	chr1	203241938	203242006	0.0230899830220713	0.068	*	*	*	*	*	0	0	*	*	*	*	*	0	0	*	*	*	*	*	0	0	chr1-203241946:203242254	chr1	203241946	203242254	chr1
chr1	203276162	203278761	0.564705882352941	0.236883323476076	0.8125	0.181818181818182	0.583333333333333	0.306098611351497	16	0.000297513736267246	HyperHigh	chr1	203274877	203276231	Intron1	+	BTG2	protein_coding	chr1	203276162	203276231	0.0265486725663717	0.05096011816839	*	*	*	*	*	0	0	*	*	*	*	*	0	0	chr1-203274765:203276655	chr1	203274765	203276655	chr1	203276162	203276231	chr1-203276181:203276505	chr1	203276181	203276505	chr1
chr1	203276162	203278761	0.564705882352941	0.236883323476076	0.8125	0.181818181818182	0.583333333333333	0.306098611351497	16	0.000297513736267246	HyperHigh	chr1	203276232	203278730	LastExon	+	BTG2	protein_coding	chr1	203276232	203278730	0.96113889957676	1	*	*	*	*	*	0	0	*	*	*	*	*	0	0	chr1-203278220:203278550	chr1	203278220	203278550	chr1	203278220	203278550	chr1-203278550:203279030	chr1	203278550	203279030	chr1
chr1	203578170	203580067	0.11	-0.213269943917524	0.946666666666667	0.81304347826087	0.326524652837875	0.544968179778551	23	0.00812719640889977	HypoLow	*	*	*	InterGenic	*	*	*	*	*	*	*	*	*	*	*	*	*	0	0	*	*	*	*	*	0	0	chr1-203578885:203579510	chr1	203578885	203579510	chr1	203578885	203579510	chr1-203579263:203579508	chr1	203579263	203579508	chr1
chr1	203732665	203734768	-0.111662846956965	0.287903554905564	0.741666666666666	0.891176470588235	0.50914044314446	0	19	0.0684852701360898	HypoHigh	chr1	203733303	203734303	Promoter	+	LAX1	protein_coding	chr1	203733303	203734303	0.475511174512601	1	*	*	*	*	*	0	0	*	*	*	*	*	0	0	chr1-203734125:203734430	chr1	203734125	203734430	chr1	203734125	203734303	chr1-203734205:203734741	chr1	203734205	203734741	chr1
chr1	203732665	203734768	-0.111662846956965	0.287903554905564	0.741666666666666	0.891176470588235	0.50914044314446	0	19	0.0684852701360898	HypoHigh	chr1	203734304	203734782	FirstExon	+	LAX1	protein_coding	chr1	203734304	203734768	0.220637184973847	0.97071129707113	*	*	*	*	*	0	0	*	*	*	*	*	0	0	chr1-203734620:203734935	chr1	203734620	203734935	chr1	203734620	203734768	chr1-203734661:203734971	chr1	203734661	203734971	chr1
chr1	203858830	203859197	0.333333333333333	0.0146949810032105	0.744565217391304	0.383333333333334	0.537237479011021	0.507313937721339	11	0.00247819005567437	HyperHigh	*	*	*	InterGenic	*	*	*	*	*	*	*	*	*	*	*	*	*	0	0	*	*	*	*	*	0	0	chr1-203858600:203859315	chr1	203858600	203859315	chr1	203858830	203859197	chr1-203859049:203859365	chr1	203859049	203859365	chr1
chr1	204120337	204120699	0.244834428024084	0.248251019231778	0.645833333333333	0.266666666666667	0.577968436791765	0.317453760464222	17	0.0041681756167058	HyperHigh	chr1	204119091	204120722	Intron1	-	ETNK2	protein_coding	chr1	204120337	204120699	1	0.221949724095647	CpG: 61	chr1	204120398	204121109	chr1	204120398	204120699	*	*	*	*	*	0	0	chr1-204119665:204121455	chr1	204119665	204121455	chr1	204120337	204120699	chr1-204120673:204121845	chr1	204120673	204121845	chr1
chr1	204155794	204158596	0.133333333333333	-0.287706856188877	0.964285714285714	0.769230769230769	0.197224259527442	0.507309364962454	24	5.37371309426138e-05	HypoLow	*	*	*	InterGenic	*	*	*	*	*	*	*	*	*	*	*	*	*	0	0	*	*	*	*	*	0	0	chr1-204158185:204158995	chr1	204158185	204158995	chr1	204158185	204158596	chr1-204158519:204158749	chr1	204158519	204158749	chr1
chr1	204308309	204313464	0.083333333333333	-0.218333066752973	1	0.869565217391304	0.174470462995874	0.429401396252419	47	9.66803335632444e-08	HypoLow	chr1	204243938	204328821	Intron1	-	PLEKHA6	protein_coding	chr1	204308309	204313464	1	0.0607306527808866	*	*	*	*	*	0	0	*	*	*	*	*	0	0	chr1-204312825:204313190	chr1	204312825	204313190	chr1	204312825	204313190	chr1-204313030:204313390	chr1	204313030	204313390	chr1
chr1	204469606	204472067	0.095673076923077	-0.277075143906179	1	0.82843137254902	0	0.42154043403449	17	8.43687307763419e-06	HypoLow	*	*	*	InterGenic	*	*	*	*	*	*	*	*	*	*	*	*	*	0	0	*	*	*	*	*	0	0	chr1-204469705:204469855	chr1	204469705	204469855	chr1	204469705	204469855	chr1-204471962:204473000	chr1	204471962	204473000	chr1
chr1	204761698	204764285	0.114648033126294	-0.2535150245269	0.942810457516339	0.785243741765481	0.255534369891082	0.555597951889808	23	0.00181102518799483	HypoLow	*	*	*	InterGenic	*	*	*	*	*	*	*	*	*	*	*	*	*	0	0	*	*	*	*	*	0	0	chr1-204762620:204762875	chr1	204762620	204762875	chr1	204762620	204762875	chr1-204763589:204763779	chr1	204763589	204763779	chr1
chr1	205020574	205024856	-0.0540540540540539	0.24986508575316	0.925925925925926	1	0.428386927233261	0	42	0.00058018716370666	HypoHigh	chr1	205012523	205022227	Intron1	+	CNTN2	protein_coding	chr1	205020574	205022227	0.386034563288183	0.170342126957955	*	*	*	*	*	0	0	*	*	*	*	*	0	0	chr1-205021785:205022355	chr1	205021785	205022355	chr1	205021785	205022227	chr1-205021906:205022182	chr1	205021906	205022182	chr1
chr1	205020574	205024856	-0.0540540540540539	0.24986508575316	0.925925925925926	1	0.428386927233261	0	42	0.00058018716370666	HypoHigh	chr1	205022228	205022383	Exon2	+	CNTN2	protein_coding	chr1	205022228	205022383	0.0361980382998599	1	*	*	*	*	*	0	0	*	*	*	*	*	0	0	chr1-205021785:205022355	chr1	205021785	205022355	chr1	205022228	205022355	*	*	*	*	*
chr1	205020574	205024856	-0.0540540540540539	0.24986508575316	0.925925925925926	1	0.428386927233261	0	42	0.00058018716370666	HypoHigh	chr1	205022384	205027048	Intron2	+	CNTN2	protein_coding	chr1	205022384	205024856	0.577300326950023	0.530017152658662	*	*	*	*	*	0	0	*	*	*	*	*	0	0	chr1-205024385:205024595	chr1	205024385	205024595	chr1	205024385	205024595	chr1-205024289:205024733	chr1	205024289	205024733	chr1
chr1	205424996	205425927	0.0755411255411253	0.244049274696781	0.118055555555555	0.0385185185185185	0.488642229024123	0.265155398538715	29	0.00161068520769225	HypoHigh	chr1	205424056	205425056	Promoter	+	RP11-576D8.4	lincRNA	chr1	205424996	205425056	0.0644468313641246	0.06	CpG: 137	chr1	205424829	205426556	chr1	205424996	205425056	*	*	*	*	*	0	0	chr1-205424700:205425395	chr1	205424700	205425395	chr1	205424996	205425056	chr1-205424998:205425983	chr1	205424998	205425983	chr1
chr1	205424996	205425927	0.0755411255411253	0.244049274696781	0.118055555555555	0.0385185185185185	0.488642229024123	0.265155398538715	29	0.00161068520769225	HypoHigh	chr1	205425057	205425351	FirstExon	+	RP11-576D8.4	lincRNA	chr1	205425057	205425351	0.315789473684211	1	CpG: 137	chr1	205424829	205426556	chr1	205425057	205425351	*	*	*	*	*	0	0	chr1-205424700:205425395	chr1	205424700	205425395	chr1	205425057	205425351	chr1-205425205:205426337	chr1	205425205	205426337	chr1
chr1	205424996	205425927	0.0755411255411253	0.244049274696781	0.118055555555555	0.0385185185185185	0.488642229024123	0.265155398538715	29	0.00161068520769225	HypoHigh	chr1	205425352	205426019	Intron1	+	RP11-576D8.4	lincRNA	chr1	205425352	205425927	0.617615467239527	0.862068965517241	CpG: 137	chr1	205424829	205426556	chr1	205425352	205425927	*	*	*	*	*	0	0	chr1-205425885:205426995	chr1	205425885	205426995	chr1	205425885	205425927	chr1-205425916:205426649	chr1	205425916	205426649	chr1
chr1	205664711	205665215	0.35	0.068449954057739	0.733333333333333	0.2	0.541938194564637	0.281783645540812	8	0.0346057661387576	HyperHigh	*	*	*	InterGenic	*	*	*	*	*	*	*	*	*	*	*	*	*	0	0	*	*	*	*	*	0	0	chr1-205664800:205665010	chr1	205664800	205665010	chr1	205664800	205665010	chr1-205664878:205665554	chr1	205664878	205665554	chr1
chr1	206222327	206222813	-0.0849206349206345	0.201253124939903	0.722619047619048	0.888888888888889	0.35490780742113	0.098612129763721	11	0.0882523231209781	HypoHigh	chr1	206214842	206222990	Intron2	-	RP11-38J22.3	antisense	chr1	206222327	206222813	1	0.0596465390279823	*	*	*	*	*	0	0	*	*	*	*	*	0	0	*	*	*	*	*	0	0	chr1-206222507:206222709	chr1	206222507	206222709	chr1
chr1	206252471	206257622	0.310606060606061	-0.107912594925477	0.824808184143222	0.563492063492063	0.469050666294807	0.568117787670826	43	1.07907909533934e-06	HyperLow	chr1	206243599	206288104	Intron1	-	C1orf186	protein_coding	chr1	206252471	206257622	1	0.115739804516346	*	*	*	*	*	0	0	*	*	*	*	*	0	0	chr1-206256345:206256495	chr1	206256345	206256495	chr1	206256345	206256495	chr1-206257559:206258109	chr1	206257559	206258109	chr1
chr1	206832291	206833806	0.123863636363637	-0.236445008527344	0.928571428571429	0.800395256916996	0.291013110528573	0.517617988712139	25	7.41282088076751e-05	HypoLow	chr1	206811107	206856251	Intron3	+	DYRK3	protein_coding	chr1	206832291	206833806	1	0.0335592769803296	*	*	*	*	*	0	0	chr1:206832398-206832801	chr1	206832398	206832801	chr1	206832398	206832801	chr1-206833185:206833775	chr1	206833185	206833775	chr1	206833185	206833775	chr1-206833627:206834027	chr1	206833627	206834027	chr1
chr1	206863173	206867128	0.105555555555556	-0.240642698295787	1	0.857142857142857	0.163843571686851	0.396862349142171	37	8.4307541480986e-05	HypoLow	chr1	206858854	206902054	Intron1	+	MAPKAPK2	protein_coding	chr1	206863173	206867128	1	0.0915509259259259	*	*	*	*	*	0	0	*	*	*	*	*	0	0	chr1-206867060:206867415	chr1	206867060	206867415	chr1	206867060	206867128	chr1-206867121:206867465	chr1	206867121	206867465	chr1
chr1	206931595	206943581	0.111111111111111	-0.263962036349222	0.95	0.80952380952381	0.167752778258549	0.452259883149013	110	5.28877526704568e-14	HypoLow	chr1	206940947	206942073	LastExon	-	IL10	protein_coding	chr1	206940947	206942073	0.093942933422326	1	*	*	*	*	*	0	0	*	*	*	*	*	0	0	chr1-206941880:206942275	chr1	206941880	206942275	chr1	206941880	206942073	chr1-206941880:206942240	chr1	206941880	206942240	chr1
chr1	206931595	206943581	0.111111111111111	-0.263962036349222	0.95	0.80952380952381	0.167752778258549	0.452259883149013	110	5.28877526704568e-14	HypoLow	chr1	206942074	206943173	Intron4	-	IL10	protein_coding	chr1	206942074	206943173	0.091690305356249	1	*	*	*	*	*	0	0	chr1:206942297-206942469	chr1	206942297	206942469	chr1	206942297	206942469	chr1-206943165:206943335	chr1	206943165	206943335	chr1	206943165	206943173	chr1-206942884:206943042	chr1	206942884	206943042	chr1
chr1	206931595	206943581	0.111111111111111	-0.263962036349222	0.95	0.80952380952381	0.167752778258549	0.452259883149013	110	5.28877526704568e-14	HypoLow	chr1	206943174	206943239	Exon4	-	IL10	protein_coding	chr1	206943174	206943239	0.00542299349240781	1	*	*	*	*	*	0	0	*	*	*	*	*	0	0	chr1-206943165:206943335	chr1	206943165	206943335	chr1	206943174	206943239	chr1-206942829:206943209	chr1	206942829	206943209	chr1
chr1	206931595	206943581	0.111111111111111	-0.263962036349222	0.95	0.80952380952381	0.167752778258549	0.452259883149013	110	5.28877526704568e-14	HypoLow	chr1	206943240	206944251	Intron3	-	IL10	protein_coding	chr1	206943240	206943581	0.0284498581678625	0.33728981206726	*	*	*	*	*	0	0	*	*	*	*	*	0	0	chr1-206943420:206943610	chr1	206943420	206943610	chr1	206943420	206943581	chr1-206943505:206944253	chr1	206943505	206944253	chr1
chr1	207103607	207103846	0.437474290415467	-0.06844831367761	0.821428571428572	0.302083333333333	0.48709911826801	0.567355617271102	7	0.025974025974026	HyperHigh	chr1	207101863	207103758	LastExon	-	PIGR	protein_coding	chr1	207103607	207103758	0.631799163179916	0.0796833773087071	*	*	*	*	*	0	0	*	*	*	*	*	0	0	chr1-207103660:207104135	chr1	207103660	207104135	chr1	207103660	207103758	chr1-207103753:207104073	chr1	207103753	207104073	chr1
chr1	207103607	207103846	0.437474290415467	-0.06844831367761	0.821428571428572	0.302083333333333	0.48709911826801	0.567355617271102	7	0.025974025974026	HyperHigh	chr1	207103759	207104841	Intron10	-	PIGR	protein_coding	chr1	207103759	207103846	0.364016736401674	0.0804066543438078	*	*	*	*	*	0	0	*	*	*	*	*	0	0	chr1-207103660:207104135	chr1	207103660	207104135	chr1	207103759	207103846	chr1-207103840:207104190	chr1	207103840	207104190	chr1
chr1	207817629	207818766	0.279605263157895	0.088003896999259	0.476190476190476	0.15	0.495158432409111	0.425871145606372	28	3.08332434080431e-06	HyperHigh	chr1	207817518	207818518	Promoter	+	CR1L	protein_coding	chr1	207817629	207818518	0.781882145998241	0.889	CpG: 53	chr1	207818389	207818952	chr1	207818389	207818518	*	*	*	*	*	0	0	chr1-207818245:207818795	chr1	207818245	207818795	chr1	207818245	207818518	chr1-207818517:207818967	chr1	207818517	207818967	chr1
chr1	207817629	207818766	0.279605263157895	0.088003896999259	0.476190476190476	0.15	0.495158432409111	0.425871145606372	28	3.08332434080431e-06	HyperHigh	chr1	207818519	207818675	FirstExon	+	CR1L	protein_coding	chr1	207818519	207818675	0.137203166226913	1	CpG: 53	chr1	207818389	207818952	chr1	207818519	207818675	*	*	*	*	*	0	0	chr1-207818245:207818795	chr1	207818245	207818795	chr1	207818519	207818675	chr1-207818642:207819006	chr1	207818642	207819006	chr1
chr1	207817629	207818766	0.279605263157895	0.088003896999259	0.476190476190476	0.15	0.495158432409111	0.425871145606372	28	3.08332434080431e-06	HyperHigh	chr1	207818676	207850733	Intron1	+	CR1L	protein_coding	chr1	207818676	207818766	0.079155672823219	0.00280749914215304	CpG: 53	chr1	207818389	207818952	chr1	207818676	207818766	*	*	*	*	*	0	0	chr1-207818245:207818795	chr1	207818245	207818795	chr1	207818676	207818766	chr1-207818749:207819159	chr1	207818749	207819159	chr1
chr1	207911444	207912270	0.263768115942029	0.303062119728349	0.764492753623188	0.166666666666667	0.563499348567847	0.282146448223672	9	0.0924113658464583	HyperHigh	*	*	*	InterGenic	*	*	*	*	*	*	*	*	*	*	*	*	*	0	0	*	*	*	*	*	0	0	chr1-207912140:207912290	chr1	207912140	207912290	chr1	207912140	207912270	chr1-207911596:207912040	chr1	207911596	207912040	chr1
chr1	207995946	207998467	0.186827303131651	-0.227515209089307	0.96551724137931	0.785714285714286	0.242743002721138	0.382944951426972	33	3.3372864599701e-07	HypoLow	*	*	*	InterGenic	*	*	*	*	*	*	*	*	*	*	*	*	*	0	0	chr1:207998055-207998202	chr1	207998055	207998202	chr1	207998055	207998202	chr1-207998380:207998390	chr1	207998380	207998390	chr1	207998380	207998390	chr1-207998350:207998660	chr1	207998350	207998660	chr1
chr1	208039831	208040925	-0.219230769230769	0.111315687645558	0.541666666666667	0.769230769230769	0.615479781557005	0.5	18	0.00446753433601026	HypoHigh	*	*	*	InterGenic	*	*	*	*	*	*	*	*	*	*	*	*	*	0	0	*	*	*	*	*	0	0	chr1-208040900:208041450	chr1	208040900	208041450	chr1	208040900	208040925	chr1-208040888:208041547	chr1	208040888	208041547	chr1
chr1	208338075	208338740	0.386569872958257	-0.301267436702538	0.941176470588235	0.481481481481481	0.233280946628746	0.583408292428412	12	0.000499119400988216	HyperLow	chr1	208315809	208383624	Intron3	-	PLXNA2	protein_coding	chr1	208338075	208338740	1	0.0098060900980609	*	*	*	*	*	0	0	*	*	*	*	*	0	0	chr1-208338405:208338570	chr1	208338405	208338570	chr1	208338405	208338570	chr1-208338140:208338484	chr1	208338140	208338484	chr1
chr1	208462255	208470613	-0.069047619047619	0.211703188129529	0.911067193675889	0.925824175824176	0.441230472784637	0.262580438494626	37	0.0889969171351013	HypoHigh	*	*	*	InterGenic	*	*	*	*	*	*	*	*	*	*	*	*	*	0	0	*	*	*	*	*	0	0	chr1-208468005:208468155	chr1	208468005	208468155	chr1	208468005	208468155	chr1-208466319:208466591	chr1	208466319	208466591	chr1
chr1	209129008	209164801	0.0743041177823785	-0.208690706607851	0.958333333333333	0.882352941176471	0.181188147733199	0.397817637242111	173	1.51044167481881e-17	HypoLow	chr1	209144798	209145798	Promoter	+	RP5-1051D14.1	lincRNA	chr1	209144798	209145798	0.027938423714134	1	*	*	*	*	*	0	0	*	*	*	*	*	0	0	chr1-209144705:209144855	chr1	209144705	209144855	chr1	209144798	209144855	*	*	*	*	*
chr1	209129008	209164801	0.0743041177823785	-0.208690706607851	0.958333333333333	0.882352941176471	0.181188147733199	0.397817637242111	173	1.51044167481881e-17	HypoLow	chr1	209145799	209146121	FirstExon	+	RP5-1051D14.1	lincRNA	chr1	209145799	209146121	0.00899617243595116	1	*	*	*	*	*	0	0	*	*	*	*	*	0	0	*	*	*	*	*	0	0	chr1-209146040:209146580	chr1	209146040	209146580	chr1
chr1	209129008	209164801	0.0743041177823785	-0.208690706607851	0.958333333333333	0.882352941176471	0.181188147733199	0.397817637242111	173	1.51044167481881e-17	HypoLow	chr1	209146122	209148380	Intron1	+	RP5-1051D14.1	lincRNA	chr1	209146122	209148380	0.0630849607465147	1	*	*	*	*	*	0	0	*	*	*	*	*	0	0	chr1-209148005:209148310	chr1	209148005	209148310	chr1	209148005	209148310	chr1-209148127:209148668	chr1	209148127	209148668	chr1
chr1	209129008	209164801	0.0743041177823785	-0.208690706607851	0.958333333333333	0.882352941176471	0.181188147733199	0.397817637242111	173	1.51044167481881e-17	HypoLow	chr1	209148381	209148652	LastExon	+	RP5-1051D14.1	lincRNA	chr1	209148381	209148652	0.00757131282653033	1	*	*	*	*	*	0	0	*	*	*	*	*	0	0	chr1-209148425:209148575	chr1	209148425	209148575	chr1	209148425	209148575	chr1-209148127:209148668	chr1	209148127	209148668	chr1
chr1	209252368	209259741	0.08989898989899	-0.216674140549451	0.967204301075269	0.861904761904762	0.127079315045022	0.343546354076522	41	0.00136182313119511	HypoLow	*	*	*	InterGenic	*	*	*	*	*	*	*	*	*	*	*	*	*	0	0	*	*	*	*	*	0	0	chr1-209257100:209257430	chr1	209257100	209257430	chr1	209257100	209257430	chr1-209257867:209258251	chr1	209257867	209258251	chr1
chr1	209785009	209785456	-0.527777777777778	0.154976790620724	0.368421052631579	0.894736842105263	0.429018009372909	0.272229696105007	8	0.0105179514104295	HypoHigh	chr1	209784898	209785136	Intron10	+	CAMK1G	protein_coding	chr1	209785009	209785136	0.284116331096197	0.533613445378151	*	*	*	*	*	0	0	*	*	*	*	*	0	0	chr1-209785080:209785515	chr1	209785080	209785515	chr1	209785080	209785136	chr1-209785126:209785382	chr1	209785126	209785382	chr1
chr1	209785009	209785456	-0.527777777777778	0.154976790620724	0.368421052631579	0.894736842105263	0.429018009372909	0.272229696105007	8	0.0105179514104295	HypoHigh	chr1	209785137	209785561	Exon11	+	CAMK1G	protein_coding	chr1	209785137	209785456	0.713646532438479	0.752358490566038	*	*	*	*	*	0	0	*	*	*	*	*	0	0	chr1-209785080:209785515	chr1	209785080	209785515	chr1	209785137	209785456	chr1-209785179:209785555	chr1	209785179	209785555	chr1
chr1	209850615	209855536	0.0909090909090909	-0.283636138898239	0.964285714285714	0.857142857142857	0.15633186452976	0.450676700585984	24	2.75603736315581e-05	HypoLow	chr1	209836407	209897374	Intron1	-	RP1-28O10.1	antisense	chr1	209850615	209855536	1	0.0807157970705464	*	*	*	*	*	0	0	*	*	*	*	*	0	0	chr1-209852705:209852855	chr1	209852705	209852855	chr1	209852705	209852855	chr1-209852503:209852779	chr1	209852503	209852779	chr1
chr1	209921010	209921547	0.603070175438596	0.021137464472083	0.76	0.125	0.328808909576947	0.272229696105007	22	3.10149367349841e-08	HyperHigh	*	*	*	InterGenic	*	*	*	*	*	*	*	*	CpG: 28	chr1	209920953	209921345	chr1	209921010	209921345	chr1:209921200-209921357	chr1	209921200	209921357	chr1	209921200	209921357	chr1-209921060:209921635	chr1	209921060	209921635	chr1	209921060	209921547	chr1-209921296:209921460	chr1	209921296	209921460	chr1
chr1	209979015	209980185	0.333333333333333	-0.167752778258549	0.85	0.428571428571429	0.38003855950487	0.583333333333333	26	0.000273982293671067	HyperLow	chr1	209975389	209979291	Intron1	-	IRF6	protein_coding	chr1	209979015	209979291	0.235897435897436	0.070732957457714	*	*	*	*	*	0	0	*	*	*	*	*	0	0	chr1-209978785:209979995	chr1	209978785	209979995	chr1	209979015	209979291	chr1-209979290:209979700	chr1	209979290	209979700	chr1
chr1	209979015	209980185	0.333333333333333	-0.167752778258549	0.85	0.428571428571429	0.38003855950487	0.583333333333333	26	0.000273982293671067	HyperLow	chr1	209979292	209979389	FirstExon	-	IRF6	protein_coding	chr1	209979292	209979389	0.0829059829059829	1	CpG: 38	chr1	209979316	209979666	chr1	209979316	209979389	*	*	*	*	*	0	0	chr1-209978785:209979995	chr1	209978785	209979995	chr1	209979292	209979389	chr1-209979385:209979885	chr1	209979385	209979885	chr1
chr1	209979015	209980185	0.333333333333333	-0.167752778258549	0.85	0.428571428571429	0.38003855950487	0.583333333333333	26	0.000273982293671067	HyperLow	chr1	209979390	209980390	Promoter	-	IRF6	protein_coding	chr1	209979390	209980185	0.67948717948718	0.795	CpG: 38	chr1	209979316	209979666	chr1	209979390	209979666	*	*	*	*	*	0	0	chr1-209978785:209979995	chr1	209978785	209979995	chr1	209979390	209979995	chr1-209979859:209980235	chr1	209979859	209980235	chr1
chr1	210111179	210112154	0.234814814814814	0.228621841809325	0.43287037037037	0.0972222222222222	0.70915406530807	0.358524745707653	23	0.000269199200770255	HyperHigh	chr1	210110595	210111595	Promoter	+	SYT14	protein_coding	chr1	210111179	210111595	0.426666666666667	0.416	CpG: 99	chr1	210111179	210112054	chr1	210111179	210111595	*	*	*	*	*	0	0	chr1-210111385:210111975	chr1	210111385	210111975	chr1	210111385	210111595	chr1-210111510:210112324	chr1	210111510	210112324	chr1
chr1	210111179	210112154	0.234814814814814	0.228621841809325	0.43287037037037	0.0972222222222222	0.70915406530807	0.358524745707653	23	0.000269199200770255	HyperHigh	chr1	210111596	210111622	FirstExon	+	SYT14	protein_coding	chr1	210111596	210111622	0.0266666666666667	1	CpG: 99	chr1	210111179	210112054	chr1	210111596	210111622	*	*	*	*	*	0	0	chr1-210111385:210111975	chr1	210111385	210111975	chr1	210111596	210111622	chr1-210111510:210112324	chr1	210111510	210112324	chr1
chr1	210111179	210112154	0.234814814814814	0.228621841809325	0.43287037037037	0.0972222222222222	0.70915406530807	0.358524745707653	23	0.000269199200770255	HyperHigh	chr1	210111623	210126053	Intron1	+	SYT14	protein_coding	chr1	210111623	210112154	0.544615384615385	0.0367983367983368	CpG: 99	chr1	210111179	210112054	chr1	210111623	210112054	*	*	*	*	*	0	0	chr1-210112085:210112490	chr1	210112085	210112490	chr1	210112085	210112154	chr1-210111890:210112897	chr1	210111890	210112897	chr1
chr1	210196876	210200664	-0.105263157894737	0.261202195652351	0.818181818181818	0.916666666666667	0.584478128729595	0.328409378678084	22	0.0411016407450071	HypoHigh	chr1	210194600	210267666	Intron4	+	SYT14	protein_coding	chr1	210196876	210200664	1	0.051843538718419	*	*	*	*	*	0	0	*	*	*	*	*	0	0	chr1-210198420:210198615	chr1	210198420	210198615	chr1	210198420	210198615	chr1-210199181:210199685	chr1	210199181	210199685	chr1
chr1	211285419	211288378	-0.0433784965034965	0.203200577829973	0.909646739130435	0.977272727272728	0.38685017591475	0.15633186452976	29	0.0146624020209497	HypoHigh	chr1	211280720	211307208	Intron1	-	KCNH1	protein_coding	chr1	211285419	211288378	1	0.111710963455149	*	*	*	*	*	0	0	*	*	*	*	*	0	0	chr1-211287625:211288075	chr1	211287625	211288075	chr1	211287625	211288075	chr1-211287782:211287963	chr1	211287782	211287963	chr1
chr1	211303287	211306579	0.187675070028011	-0.212293143811123	0.91304347826087	0.666666666666667	0.350980253520878	0.524207887965055	20	0.00744721061597502	HypoLow	chr1	211280720	211307208	Intron1	-	KCNH1	protein_coding	chr1	211303287	211306579	1	0.124282694050136	*	*	*	*	*	0	0	*	*	*	*	*	0	0	chr1-211306205:211306415	chr1	211306205	211306415	chr1	211306205	211306415	chr1-211306557:211306860	chr1	211306557	211306860	chr1
[truncated: 13,117 more rows]
[truncated: 2 more columns]

## Sheet: README
The table reports DMRs identified in sample UD5 at Relapse vs Tumor (first diagnosis). For each DMR we report all the fields of the annotated PoreMeth2 output as documented on GitHub (https://github.com/Lab-CoMBINE/PoreMeth2).
