# Supplementary material for: PoreMeth2 for decoding the evolution of methylome alterations with nanopore sequencing
Source: HighWire-hosted journal article supplement (doi:10.1101/gr.280259.124), 2025-10-20
Supplement: Supplemental_Table_2.xlsx [file Supplemental_Table_2.xlsx]

## Sheet: DMRs_UD10_Rel_vs_UD10_Tum
chr	start	end	DeltaBeta	DeltaEntropy	BetaRel	BetaTum	EntropyRel	EntropyTum	NumCpG	PValue	Class	chr.GenCode	start.GenCode	end.GenCode	feature.GenCode	strand.GenCode	symbol.GenCode	type.GenCode	chr.GenCode.overlap	start.GenCode.overlap	end.GenCode.overlap	ratio1.GenCode.overlap	ratio2.GenCode.overlap	name.CGI	chr.CGI	start.CGI	end.CGI	chr.CGI.overlap	start.CGI.overlap	end.CGI.overlap	name.Enhancer	chr.Enhancer	start.Enhancer	end.Enhancer	chr.Enhancer.overlap	start.Enhancer.overlap	end.Enhancer.overlap	name.DNASE	chr.DNASE	start.DNASE	end.DNASE	chr.DNASE.overlap	start.DNASE.overlap	end.DNASE.overlap	name.TFBS	chr.TFBS	start.TFBS	end.TFBS	chr.TFBS.overlap
chr1	869479	870198	0.44433465085639	-0.298496924343947	0.809090909090909	0.3	0.519957589191677	0.742279570687324	27	3.36187757111655e-08	HyperLow	chr1	866470	871151	Intron4	+	SAMD11	protein_coding	chr1	869479	870198	1	0.153599658192694	CpG: 178	chr1	869332	871872	chr1	869479	870198	*	*	*	*	*	0	0	*	*	*	*	*	0	0	chr1-870178:871805	chr1	870178	871805	chr1
chr1	1109011	1109724	0.236111111111111	-0.115979054952236	0.678571428571428	0.0727272727272728	0.328609144127516	0.317453760464222	21	0.00274625190985301	HyperLow	chr1	1108436	1111776	LastExon	-	TTLL10-AS1	antisense	chr1	1109011	1109724	1	0.213473053892216	CpG: 59	chr1	1109314	1110145	chr1	1109314	1109724	*	*	*	*	*	0	0	chr1-1109645:1109795	chr1	1109645	1109795	chr1	1109645	1109724	chr1-1109723:1110133	chr1	1109723	1110133	chr1
chr1	1109011	1109724	0.236111111111111	-0.115979054952236	0.678571428571428	0.0727272727272728	0.328609144127516	0.317453760464222	21	0.00274625190985301	HyperLow	chr1	1108282	1109282	Promoter	+	TTLL10	protein_coding	chr1	1109011	1109282	0.380084151472651	0.271	*	*	*	*	*	0	0	*	*	*	*	*	0	0	chr1-1109025:1109535	chr1	1109025	1109535	chr1	1109025	1109282	chr1-1109163:1109319	chr1	1109163	1109319	chr1
chr1	1109011	1109724	0.236111111111111	-0.115979054952236	0.678571428571428	0.0727272727272728	0.328609144127516	0.317453760464222	21	0.00274625190985301	HyperLow	chr1	1109283	1109306	FirstExon	+	TTLL10	protein_coding	chr1	1109283	1109306	0.032258064516129	1	*	*	*	*	*	0	0	*	*	*	*	*	0	0	chr1-1109025:1109535	chr1	1109025	1109535	chr1	1109283	1109306	chr1-1109163:1109319	chr1	1109163	1109319	chr1
chr1	1109011	1109724	0.236111111111111	-0.115979054952236	0.678571428571428	0.0727272727272728	0.328609144127516	0.317453760464222	21	0.00274625190985301	HyperLow	chr1	1109307	1109645	Intron1	+	TTLL10	protein_coding	chr1	1109307	1109645	0.474053295932679	1	CpG: 59	chr1	1109314	1110145	chr1	1109314	1109645	*	*	*	*	*	0	0	chr1-1109025:1109535	chr1	1109025	1109535	chr1	1109307	1109535	chr1-1109610:1109850	chr1	1109610	1109850	chr1
chr1	1109011	1109724	0.236111111111111	-0.115979054952236	0.678571428571428	0.0727272727272728	0.328609144127516	0.317453760464222	21	0.00274625190985301	HyperLow	chr1	1109646	1109701	Exon2	+	TTLL10	protein_coding	chr1	1109646	1109701	0.0771388499298738	1	CpG: 59	chr1	1109314	1110145	chr1	1109646	1109701	*	*	*	*	*	0	0	chr1-1109645:1109795	chr1	1109645	1109795	chr1	1109646	1109701	chr1-1109610:1109850	chr1	1109610	1109850	chr1
chr1	1109011	1109724	0.236111111111111	-0.115979054952236	0.678571428571428	0.0727272727272728	0.328609144127516	0.317453760464222	21	0.00274625190985301	HyperLow	chr1	1109702	1109803	Intron2	+	TTLL10	protein_coding	chr1	1109702	1109724	0.0308555399719495	0.217821782178218	CpG: 59	chr1	1109314	1110145	chr1	1109702	1109724	*	*	*	*	*	0	0	chr1-1109645:1109795	chr1	1109645	1109795	chr1	1109702	1109724	chr1-1109723:1110133	chr1	1109723	1110133	chr1
chr1	1195164	1197128	-0.183333333333333	-0.218003298280581	0	0.25	0.240642698295787	0.516264980231799	38	1.32243591333765e-06	HypoLow	chr1	1192691	1198725	Intron3	-	UBE2J2	protein_coding	chr1	1195164	1197128	1	0.325488896254558	*	*	*	*	*	0	0	*	*	*	*	*	0	0	chr1-1196600:1196850	chr1	1196600	1196850	chr1	1196600	1196850	chr1-1196778:1197188	chr1	1196778	1197188	chr1
chr1	1290073	1291082	0.238235294117647	0.187170034884213	0.5	0.0952380952380952	0.63066516234634	0.440535652796116	32	4.84316856649468e-05	HyperHigh	chr1	1290062	1290532	Exon5	-	MXRA8	protein_coding	chr1	1290073	1290532	0.454905847373637	0.976595744680851	CpG: 152	chr1	1289707	1291126	chr1	1290073	1290532	*	*	*	*	*	0	0	chr1-1290425:1290695	chr1	1290425	1290695	chr1	1290425	1290532	chr1-1290361:1290851	chr1	1290361	1290851	chr1
chr1	1290073	1291082	0.238235294117647	0.187170034884213	0.5	0.0952380952380952	0.63066516234634	0.440535652796116	32	4.84316856649468e-05	HyperHigh	chr1	1290533	1290623	Intron4	-	MXRA8	protein_coding	chr1	1290533	1290623	0.089197224975223	1	CpG: 152	chr1	1289707	1291126	chr1	1290533	1290623	*	*	*	*	*	0	0	chr1-1290425:1290695	chr1	1290425	1290695	chr1	1290533	1290623	chr1-1290567:1291167	chr1	1290567	1291167	chr1
chr1	1290073	1291082	0.238235294117647	0.187170034884213	0.5	0.0952380952380952	0.63066516234634	0.440535652796116	32	4.84316856649468e-05	HyperHigh	chr1	1290624	1290725	Exon4	-	MXRA8	protein_coding	chr1	1290624	1290725	0.10009910802775	1	CpG: 152	chr1	1289707	1291126	chr1	1290624	1290725	*	*	*	*	*	0	0	chr1-1290425:1290695	chr1	1290425	1290695	chr1	1290624	1290695	chr1-1290567:1291167	chr1	1290567	1291167	chr1
chr1	1290073	1291082	0.238235294117647	0.187170034884213	0.5	0.0952380952380952	0.63066516234634	0.440535652796116	32	4.84316856649468e-05	HyperHigh	chr1	1290726	1290829	Intron3	-	MXRA8	protein_coding	chr1	1290726	1290829	0.102081268582755	1	CpG: 152	chr1	1289707	1291126	chr1	1290726	1290829	*	*	*	*	*	0	0	chr1-1290820:1291375	chr1	1290820	1291375	chr1	1290820	1290829	chr1-1290826:1291196	chr1	1290826	1291196	chr1
chr1	1290073	1291082	0.238235294117647	0.187170034884213	0.5	0.0952380952380952	0.63066516234634	0.440535652796116	32	4.84316856649468e-05	HyperHigh	chr1	1290830	1291132	Exon3	-	MXRA8	protein_coding	chr1	1290830	1291082	0.249752229930624	0.834437086092715	CpG: 152	chr1	1289707	1291126	chr1	1290830	1291082	*	*	*	*	*	0	0	chr1-1290820:1291375	chr1	1290820	1291375	chr1	1290830	1291082	chr1-1290826:1291196	chr1	1290826	1291196	chr1
chr1	1534575	1534912	0.261111111111111	0.146811616182905	0.661616161616162	0.118055555555555	0.576172943212658	0.445127873588182	15	0.0128961304159461	HyperHigh	chr1	1533392	1535476	FirstExon	-	C1orf233	protein_coding	chr1	1534575	1534912	1	0.161708253358925	CpG: 160	chr1	1534331	1536136	chr1	1534575	1534912	*	*	*	*	*	0	0	chr1-1533685:1536875	chr1	1533685	1536875	chr1	1534575	1534912	chr1-1534898:1535414	chr1	1534898	1535414	chr1
chr1	1564421	1565540	0.410526315789474	0.300231645863896	0.6125	0.1125	0.605808707256281	0.314443149109345	37	1.86074117756779e-09	HyperHigh	chr1	1564103	1564512	Intron16	+	MIB2	protein_coding	chr1	1564421	1564512	0.0813226094727435	0.222493887530562	CpG: 470	chr1	1564421	1570006	chr1	1564421	1564512	*	*	*	*	*	0	0	chr1-1564425:1564735	chr1	1564425	1564735	chr1	1564425	1564512	chr1-1564492:1564907	chr1	1564492	1564907	chr1
chr1	1564421	1565540	0.410526315789474	0.300231645863896	0.6125	0.1125	0.605808707256281	0.314443149109345	37	1.86074117756779e-09	HyperHigh	chr1	1564513	1564691	Exon17	+	MIB2	protein_coding	chr1	1564513	1564691	0.159070598748883	1	CpG: 470	chr1	1564421	1570006	chr1	1564513	1564691	*	*	*	*	*	0	0	chr1-1564425:1564735	chr1	1564425	1564735	chr1	1564513	1564691	chr1-1564604:1565184	chr1	1564604	1565184	chr1
chr1	1564421	1565540	0.410526315789474	0.300231645863896	0.6125	0.1125	0.605808707256281	0.314443149109345	37	1.86074117756779e-09	HyperHigh	chr1	1564692	1564764	Intron17	+	MIB2	protein_coding	chr1	1564692	1564764	0.064343163538874	1	CpG: 470	chr1	1564421	1570006	chr1	1564692	1564764	*	*	*	*	*	0	0	chr1-1564425:1564735	chr1	1564425	1564735	chr1	1564692	1564735	chr1-1564731:1565327	chr1	1564731	1565327	chr1
chr1	1564421	1565540	0.410526315789474	0.300231645863896	0.6125	0.1125	0.605808707256281	0.314443149109345	37	1.86074117756779e-09	HyperHigh	chr1	1564765	1564946	Exon18	+	MIB2	protein_coding	chr1	1564765	1564946	0.161751563896336	1	CpG: 470	chr1	1564421	1570006	chr1	1564765	1564946	*	*	*	*	*	0	0	chr1-1564825:1565955	chr1	1564825	1565955	chr1	1564825	1564946	chr1-1564886:1565091	chr1	1564886	1565091	chr1
chr1	1564421	1565540	0.410526315789474	0.300231645863896	0.6125	0.1125	0.605808707256281	0.314443149109345	37	1.86074117756779e-09	HyperHigh	chr1	1564947	1565018	Intron18	+	MIB2	protein_coding	chr1	1564947	1565018	0.063449508489723	1	CpG: 470	chr1	1564421	1570006	chr1	1564947	1565018	*	*	*	*	*	0	0	chr1-1564825:1565955	chr1	1564825	1565955	chr1	1564947	1565018	chr1-1564886:1565091	chr1	1564886	1565091	chr1
chr1	1564421	1565540	0.410526315789474	0.300231645863896	0.6125	0.1125	0.605808707256281	0.314443149109345	37	1.86074117756779e-09	HyperHigh	chr1	1565019	1565084	Exon19	+	MIB2	protein_coding	chr1	1565019	1565084	0.0580875781948168	1	CpG: 470	chr1	1564421	1570006	chr1	1565019	1565084	*	*	*	*	*	0	0	chr1-1564825:1565955	chr1	1564825	1565955	chr1	1565019	1565084	chr1-1564886:1565091	chr1	1564886	1565091	chr1
chr1	1564421	1565540	0.410526315789474	0.300231645863896	0.6125	0.1125	0.605808707256281	0.314443149109345	37	1.86074117756779e-09	HyperHigh	chr1	1565085	1565671	Intron19	+	MIB2	protein_coding	chr1	1565085	1565540	0.406613047363718	0.776450511945392	CpG: 470	chr1	1564421	1570006	chr1	1565085	1565540	*	*	*	*	*	0	0	chr1-1564825:1565955	chr1	1564825	1565955	chr1	1565085	1565540	chr1-1565522:1566106	chr1	1565522	1566106	chr1
chr1	1977976	1979565	0.229166666666667	-0.040892394997682	0.8125	0.5	0.45698353148489	0.5	34	0.00114464569134223	HyperHigh	*	*	*	InterGenic	*	*	*	*	*	*	*	*	*	*	*	*	*	0	0	chr1:1978731-1978937	chr1	1978731	1978937	chr1	1978731	1978937	chr1-1979100:1979410	chr1	1979100	1979410	chr1	1979100	1979410	chr1-1979167:1980191	chr1	1979167	1980191	chr1
chr1	1980637	1982774	0.105263157894737	0.232070753375049	0.157894736842105	0.0526315789473684	0.432931646898466	0.228012811879681	62	1.03400419834529e-05	HypoHigh	chr1	1980743	1980907	LastExon	-	RP11-547D24.3	antisense	chr1	1980743	1980907	0.0767430978006551	1	*	*	*	*	*	0	0	*	*	*	*	*	0	0	*	*	*	*	*	0	0	chr1-1980906:1981136	chr1	1980906	1981136	chr1
chr1	1980637	1982774	0.105263157894737	0.232070753375049	0.157894736842105	0.0526315789473684	0.432931646898466	0.228012811879681	62	1.03400419834529e-05	HypoHigh	chr1	1980908	1981036	Intron2	-	RP11-547D24.3	antisense	chr1	1980908	1981036	0.0598970519419747	1	*	*	*	*	*	0	0	*	*	*	*	*	0	0	chr1-1980925:1981235	chr1	1980925	1981235	chr1	1980925	1981036	chr1-1981035:1981475	chr1	1981035	1981475	chr1
chr1	1980637	1982774	0.105263157894737	0.232070753375049	0.157894736842105	0.0526315789473684	0.432931646898466	0.228012811879681	62	1.03400419834529e-05	HypoHigh	chr1	1981037	1981105	Exon2	-	RP11-547D24.3	antisense	chr1	1981037	1981105	0.0318203088441741	1	*	*	*	*	*	0	0	*	*	*	*	*	0	0	chr1-1980925:1981235	chr1	1980925	1981235	chr1	1981037	1981105	chr1-1981099:1981748	chr1	1981099	1981748	chr1
chr1	1980637	1982774	0.105263157894737	0.232070753375049	0.157894736842105	0.0526315789473684	0.432931646898466	0.228012811879681	62	1.03400419834529e-05	HypoHigh	chr1	1981106	1981306	Intron1	-	RP11-547D24.3	antisense	chr1	1981106	1981306	0.0935891436593355	1	CpG: 195	chr1	1981251	1983212	chr1	1981251	1981306	*	*	*	*	*	0	0	chr1-1981245:1981495	chr1	1981245	1981495	chr1	1981245	1981306	chr1-1981273:1981534	chr1	1981273	1981534	chr1
chr1	1980637	1982774	0.105263157894737	0.232070753375049	0.157894736842105	0.0526315789473684	0.432931646898466	0.228012811879681	62	1.03400419834529e-05	HypoHigh	chr1	1981307	1981509	FirstExon	-	RP11-547D24.3	antisense	chr1	1981307	1981509	0.0945250350959289	1	CpG: 195	chr1	1981251	1983212	chr1	1981307	1981509	*	*	*	*	*	0	0	chr1-1981245:1981495	chr1	1981245	1981495	chr1	1981307	1981495	chr1-1981482:1982529	chr1	1981482	1982529	chr1
chr1	1980637	1982774	0.105263157894737	0.232070753375049	0.157894736842105	0.0526315789473684	0.432931646898466	0.228012811879681	62	1.03400419834529e-05	HypoHigh	chr1	1981510	1982510	Promoter	-	RP11-547D24.3	antisense	chr1	1981510	1982510	0.467945718296678	1	CpG: 195	chr1	1981251	1983212	chr1	1981510	1982510	*	*	*	*	*	0	0	chr1-1982320:1982575	chr1	1982320	1982575	chr1	1982320	1982510	chr1-1982328:1983091	chr1	1982328	1983091	chr1
chr1	2346511	2347014	0.305555555555556	-0.017551586800059	0.8	0.444444444444444	0.417209722462608	0.432931646898466	12	0.00845596197909701	HyperHigh	*	*	*	InterGenic	*	*	*	*	*	*	*	*	*	*	*	*	*	0	0	*	*	*	*	*	0	0	chr1-2346685:2347570	chr1	2346685	2347570	chr1	2346685	2347014	chr1-2346910:2347744	chr1	2346910	2347744	chr1
chr1	2562715	2564628	-0.105769230769231	0.201210753610957	0.8	0.923076923076923	0.510164352252494	0.270426041486378	34	0.00499339660714185	HypoHigh	chr1	2560961	2564304	Intron1	-	MMEL1	protein_coding	chr1	2562715	2564304	0.830632514375327	0.475321567454382	*	*	*	*	*	0	0	*	*	*	*	*	0	0	chr1-2563925:2564255	chr1	2563925	2564255	chr1	2563925	2564255	chr1-2564246:2564656	chr1	2564246	2564656	chr1
chr1	2562715	2564628	-0.105769230769231	0.201210753610957	0.8	0.923076923076923	0.510164352252494	0.270426041486378	34	0.00499339660714185	HypoHigh	chr1	2564305	2564429	FirstExon	-	MMEL1	protein_coding	chr1	2564305	2564429	0.0648196549921589	1	*	*	*	*	*	0	0	*	*	*	*	*	0	0	chr1-2564400:2564775	chr1	2564400	2564775	chr1	2564400	2564429	chr1-2564335:2565100	chr1	2564335	2565100	chr1
chr1	2562715	2564628	-0.105769230769231	0.201210753610957	0.8	0.923076923076923	0.510164352252494	0.270426041486378	34	0.00499339660714185	HypoHigh	chr1	2564430	2565430	Promoter	-	MMEL1	protein_coding	chr1	2564430	2564628	0.103502352326189	0.198	*	*	*	*	*	0	0	*	*	*	*	*	0	0	chr1-2564400:2564775	chr1	2564400	2564775	chr1	2564430	2564628	chr1-2564468:2564908	chr1	2564468	2564908	chr1
chr1	2562715	2564628	-0.105769230769231	0.201210753610957	0.8	0.923076923076923	0.510164352252494	0.270426041486378	34	0.00499339660714185	HypoHigh	chr1	2563006	2564006	Promoter	+	RP13-436F16.1	antisense	chr1	2563006	2564006	0.522739153162572	1	*	*	*	*	*	0	0	*	*	*	*	*	0	0	chr1-2563925:2564255	chr1	2563925	2564255	chr1	2563925	2564006	chr1-2563959:2564183	chr1	2563959	2564183	chr1
chr1	2562715	2564628	-0.105769230769231	0.201210753610957	0.8	0.923076923076923	0.510164352252494	0.270426041486378	34	0.00499339660714185	HypoHigh	chr1	2564007	2564114	FirstExon	+	RP13-436F16.1	antisense	chr1	2564007	2564114	0.0559330893883952	1	*	*	*	*	*	0	0	*	*	*	*	*	0	0	chr1-2563925:2564255	chr1	2563925	2564255	chr1	2564007	2564114	chr1-2563959:2564183	chr1	2563959	2564183	chr1
chr1	2562715	2564628	-0.105769230769231	0.201210753610957	0.8	0.923076923076923	0.510164352252494	0.270426041486378	34	0.00499339660714185	HypoHigh	chr1	2564115	2567794	Intron1	+	RP13-436F16.1	antisense	chr1	2564115	2564628	0.268165185572399	0.139440065235118	*	*	*	*	*	0	0	*	*	*	*	*	0	0	chr1-2564400:2564775	chr1	2564400	2564775	chr1	2564400	2564628	chr1-2564468:2564908	chr1	2564468	2564908	chr1
chr1	2705539	2706896	0.4	0.019017055405715	0.647058823529412	0.19047619047619	0.528320833573719	0.520896013101303	48	9.24953933031123e-11	HyperHigh	chr1	2702498	2717335	Intron2	-	TTC34	protein_coding	chr1	2705539	2706896	1	0.0914605378445777	CpG: 111	chr1	2706025	2706961	chr1	2706025	2706896	*	*	*	*	*	0	0	chr1-2706385:2706815	chr1	2706385	2706815	chr1	2706385	2706815	chr1-2706110:2706343	chr1	2706110	2706343	chr1
chr1	2977359	2979940	-0.0663435828877005	0.274880179584141	0.852870813397129	0.95	0.41740240313959	0.130414521209752	49	0.00114866625311751	HypoHigh	chr1	2977169	2977670	Intron4	-	LINC00982	antisense	chr1	2977359	2977670	0.120495931809376	0.620758483033932	*	*	*	*	*	0	0	*	*	*	*	*	0	0	chr1-2977405:2977875	chr1	2977405	2977875	chr1	2977405	2977670	chr1-2977590:2977818	chr1	2977590	2977818	chr1
chr1	2977359	2979940	-0.0663435828877005	0.274880179584141	0.852870813397129	0.95	0.41740240313959	0.130414521209752	49	0.00114866625311751	HypoHigh	chr1	2977671	2980619	Exon4	-	LINC00982	antisense	chr1	2977671	2979940	0.879116621464549	0.769674355495251	CpG: 126	chr1	2979275	2980758	chr1	2979275	2979940	*	*	*	*	*	0	0	chr1-2979645:2979795	chr1	2979645	2979795	chr1	2979645	2979795	chr1-2979839:2980203	chr1	2979839	2980203	chr1
chr1	2994716	2996092	0.277287581699346	-0.111111111111111	0.723809523809523	0.410526315789474	0.459594497828725	0.500979375934018	35	0.000528761294960031	HyperLow	chr1	2985861	3102688	Intron1	+	PRDM16	protein_coding	chr1	2994716	2996092	1	0.0117780992407577	*	*	*	*	*	0	0	*	*	*	*	*	0	0	chr1-2996065:2996570	chr1	2996065	2996570	chr1	2996065	2996092	chr1-2995040:2995430	chr1	2995040	2995430	chr1
chr1	3036004	3037145	-0.231612685560054	-0.179848252869891	0.190909090909091	0.459935897435897	0.306098611351497	0.471266521535227	21	0.00347685483108613	HypoLow	chr1	2985861	3102688	Intron1	+	PRDM16	protein_coding	chr1	3036004	3037145	1	0.00976657793147132	*	*	*	*	*	0	0	*	*	*	*	*	0	0	chr1-3037025:3037175	chr1	3037025	3037175	chr1	3037025	3037145	chr1-3036434:3036699	chr1	3036434	3036699	chr1
chr1	3164131	3164628	0.122957516339869	0.20533636559046	0.215909090909091	0.0513157894736842	0.451796180735845	0.201842495543515	21	0.0101741958567398	HypoHigh	chr1	3160702	3301715	Intron3	+	PRDM16	protein_coding	chr1	3164131	3164628	1	0.003524497741343	CpG: 65	chr1	3163969	3164643	chr1	3164131	3164628	*	*	*	*	*	0	0	chr1-3164045:3164615	chr1	3164045	3164615	chr1	3164131	3164615	chr1-3164418:3164742	chr1	3164418	3164742	chr1
chr1	3239711	3240598	0.282405462184874	0.0919834712585145	0.563492063492063	0.122222222222222	0.40007733694479	0.336786806603985	25	0.000343418088629703	HyperHigh	chr1	3160702	3301715	Intron3	+	PRDM16	protein_coding	chr1	3239711	3240598	1	0.00629020019430833	CpG: 24	chr1	3239915	3240261	chr1	3239915	3240261	*	*	*	*	*	0	0	chr1-3240585:3240875	chr1	3240585	3240875	chr1	3240585	3240598	chr1-3240564:3241106	chr1	3240564	3241106	chr1
chr1	3566949	3567985	0.216666666666667	0.273764786727564	0.434782608695652	0.08	0.673395565614749	0.41107492940674	36	1.99511943061533e-05	HyperHigh	chr1	3566638	3567638	Promoter	-	WRAP73	protein_coding	chr1	3566949	3567638	0.665057915057915	0.689	CpG: 284	chr1	3566445	3569636	chr1	3566949	3567638	*	*	*	*	*	0	0	chr1-3567225:3570175	chr1	3567225	3570175	chr1	3567225	3567638	chr1-3567570:3568274	chr1	3567570	3568274	chr1
chr1	3797181	3797986	-0.283700980392157	-0.12159565975227	0.0555555555555555	0.408333333333334	0.243550091017914	0.3831324901159	15	0.000580899816071163	HypoLow	chr1	3789137	3800070	Intron6	+	DFFB	protein_coding	chr1	3797181	3797986	1	0.0736302936065124	*	*	*	*	*	0	0	*	*	*	*	*	0	0	chr1-3797720:3798075	chr1	3797720	3798075	chr1	3797720	3797986	chr1-3797828:3798068	chr1	3797828	3798068	chr1
chr1	3820206	3821274	-0.25	-0.257894792087341	0.0625	0.4	0.216674140549451	0.417209722462608	18	0.000872281787286947	HypoLow	chr1	3817196	3830958	Intron1	+	RP13-15E13.1	lincRNA	chr1	3820206	3821274	1	0.0776049992733614	*	*	*	*	*	0	0	*	*	*	*	*	0	0	chr1-3820700:3821035	chr1	3820700	3821035	chr1	3820700	3821035	chr1-3820925:3821729	chr1	3820925	3821729	chr1
chr1	4621347	4621540	0.371212121212121	-0.0166783905996585	0.85	0.25	0.48345193139559	0.441804173742225	9	0.0205814484171981	HyperHigh	*	*	*	InterGenic	*	*	*	*	*	*	*	*	*	*	*	*	*	0	0	*	*	*	*	*	0	0	chr1-4621405:4621555	chr1	4621405	4621555	chr1	4621405	4621540	*	*	*	*	*
chr1	4791997	4794011	0.071428571428571	-0.287706856188877	1	0.888888888888889	0.197224259527442	0.45698353148489	26	0.0112439183572198	HypoLow	chr1	4772760	4829912	Intron2	+	AJAP1	protein_coding	chr1	4791997	4794011	1	0.0352393617021277	*	*	*	*	*	0	0	*	*	*	*	*	0	0	chr1-4793745:4793895	chr1	4793745	4793895	chr1	4793745	4793895	chr1-4793266:4793700	chr1	4793266	4793700	chr1
chr1	5726219	5728077	0.033333333333333	0.236883323476076	0.777777777777778	0.764705882352941	0.518195056445933	0.306098611351497	30	1	HypoHigh	chr1	5647636	5728200	Intron1	-	RP11-154H17.1	lincRNA	chr1	5726219	5728077	1	0.0230624100094335	*	*	*	*	*	0	0	*	*	*	*	*	0	0	chr1-5728020:5728655	chr1	5728020	5728655	chr1	5728020	5728077	*	*	*	*	*
chr1	6100597	6101331	0.211764705882353	-0.254734835502873	0.947368421052632	0.739130434782609	0.228012811879681	0.501958751868036	18	0.00136844534978297	HyperLow	chr1	6100577	6100705	Exon2	+	KCNAB2	protein_coding	chr1	6100597	6100705	0.147138964577657	0.84375	*	*	*	*	*	0	0	*	*	*	*	*	0	0	chr1-6100625:6100895	chr1	6100625	6100895	chr1	6100625	6100705	chr1-6100381:6100821	chr1	6100381	6100821	chr1
chr1	6100597	6101331	0.211764705882353	-0.254734835502873	0.947368421052632	0.739130434782609	0.228012811879681	0.501958751868036	18	0.00136844534978297	HyperLow	chr1	6100706	6101890	Intron2	+	KCNAB2	protein_coding	chr1	6100706	6101331	0.85149863760218	0.527871621621622	*	*	*	*	*	0	0	*	*	*	*	*	0	0	chr1-6100965:6101350	chr1	6100965	6101350	chr1	6100965	6101331	chr1-6101280:6102213	chr1	6101280	6102213	chr1
chr1	6187632	6188194	0.220269423558897	0.0707874609641345	0.46875	0.295031055900622	0.507765594049157	0.43871937411238	21	0.0325525781039882	HyperHigh	chr1	6186807	6188105	Intron25	-	CHD5	protein_coding	chr1	6187632	6188105	0.841637010676157	0.364406779661017	CpG: 41	chr1	6187743	6188235	chr1	6187743	6188105	*	*	*	*	*	0	0	chr1-6187805:6188415	chr1	6187805	6188415	chr1	6187805	6188105	chr1-6187932:6188519	chr1	6187932	6188519	chr1
chr1	6187632	6188194	0.220269423558897	0.0707874609641345	0.46875	0.295031055900622	0.507765594049157	0.43871937411238	21	0.0325525781039882	HyperHigh	chr1	6188106	6188278	Exon25	-	CHD5	protein_coding	chr1	6188106	6188194	0.156583629893238	0.511627906976744	CpG: 41	chr1	6187743	6188235	chr1	6188106	6188194	*	*	*	*	*	0	0	chr1-6187805:6188415	chr1	6187805	6188415	chr1	6188106	6188194	chr1-6188124:6188374	chr1	6188124	6188374	chr1
chr1	6264695	6265347	0.246212121212121	0.00211809539270502	0.555555555555556	0.303571428571428	0.5	0.343363445549542	19	0.0198889787703416	HyperHigh	chr1	6264900	6265042	LastExon	-	RP1-120G22.11	antisense	chr1	6264900	6265042	0.217791411042945	1	*	*	*	*	*	0	0	*	*	*	*	*	0	0	chr1-6264800:6265535	chr1	6264800	6265535	chr1	6264900	6265042	chr1-6265040:6265490	chr1	6265040	6265490	chr1
chr1	6264695	6265347	0.246212121212121	0.00211809539270502	0.555555555555556	0.303571428571428	0.5	0.343363445549542	19	0.0198889787703416	HyperHigh	chr1	6265043	6265265	Intron2	-	RP1-120G22.11	antisense	chr1	6265043	6265265	0.340490797546012	1	*	*	*	*	*	0	0	*	*	*	*	*	0	0	chr1-6264800:6265535	chr1	6264800	6265535	chr1	6265043	6265265	chr1-6265260:6265676	chr1	6265260	6265676	chr1
chr1	6264695	6265347	0.246212121212121	0.00211809539270502	0.555555555555556	0.303571428571428	0.5	0.343363445549542	19	0.0198889787703416	HyperHigh	chr1	6265266	6265473	Exon2	-	RP1-120G22.11	antisense	chr1	6265266	6265347	0.124233128834356	0.391304347826087	*	*	*	*	*	0	0	*	*	*	*	*	0	0	chr1-6264800:6265535	chr1	6264800	6265535	chr1	6265266	6265347	chr1-6265340:6265750	chr1	6265340	6265750	chr1
chr1	6264695	6265347	0.246212121212121	0.00211809539270502	0.555555555555556	0.303571428571428	0.5	0.343363445549542	19	0.0198889787703416	HyperHigh	chr1	6265235	6266235	Promoter	+	RNF207	protein_coding	chr1	6265235	6265347	0.171779141104294	0.112	*	*	*	*	*	0	0	*	*	*	*	*	0	0	chr1-6264800:6265535	chr1	6264800	6265535	chr1	6265235	6265347	chr1-6265340:6265750	chr1	6265340	6265750	chr1
chr1	6477580	6480650	0.0588235294117647	0.206500297786364	0.19047619047619	0.0555555555555556	0.440726448505556	0.216674140549451	82	0.00102159116966199	HypoHigh	chr1	6473343	6479666	Intron3	-	HES2	protein_coding	chr1	6477580	6479666	0.679478827361564	0.329906689862407	CpG: 180	chr1	6479057	6480938	chr1	6479057	6479666	*	*	*	*	*	0	0	chr1-6479605:6481190	chr1	6479605	6481190	chr1	6479605	6479666	chr1-6479560:6480056	chr1	6479560	6480056	chr1
chr1	6477580	6480650	0.0588235294117647	0.206500297786364	0.19047619047619	0.0555555555555556	0.440726448505556	0.216674140549451	82	0.00102159116966199	HypoHigh	chr1	6479667	6479762	Exon3	-	HES2	protein_coding	chr1	6479667	6479762	0.0309446254071661	1	CpG: 180	chr1	6479057	6480938	chr1	6479667	6479762	*	*	*	*	*	0	0	chr1-6479605:6481190	chr1	6479605	6481190	chr1	6479667	6479762	chr1-6479692:6481167	chr1	6479692	6481167	chr1
chr1	6477580	6480650	0.0588235294117647	0.206500297786364	0.19047619047619	0.0555555555555556	0.440726448505556	0.216674140549451	82	0.00102159116966199	HypoHigh	chr1	6479763	6479835	Intron2	-	HES2	protein_coding	chr1	6479763	6479835	0.0234527687296417	1	CpG: 180	chr1	6479057	6480938	chr1	6479763	6479835	*	*	*	*	*	0	0	chr1-6479605:6481190	chr1	6479605	6481190	chr1	6479763	6479835	chr1-6479815:6480519	chr1	6479815	6480519	chr1
chr1	6477580	6480650	0.0588235294117647	0.206500297786364	0.19047619047619	0.0555555555555556	0.440726448505556	0.216674140549451	82	0.00102159116966199	HypoHigh	chr1	6479836	6479903	Exon2	-	HES2	protein_coding	chr1	6479836	6479903	0.0218241042345277	1	CpG: 180	chr1	6479057	6480938	chr1	6479836	6479903	*	*	*	*	*	0	0	chr1-6479605:6481190	chr1	6479605	6481190	chr1	6479836	6479903	chr1-6479894:6480857	chr1	6479894	6480857	chr1
chr1	6477580	6480650	0.0588235294117647	0.206500297786364	0.19047619047619	0.0555555555555556	0.440726448505556	0.216674140549451	82	0.00102159116966199	HypoHigh	chr1	6479904	6484537	Intron1	-	HES2	protein_coding	chr1	6479904	6480650	0.24299674267101	0.161018778329376	CpG: 180	chr1	6479057	6480938	chr1	6479904	6480650	*	*	*	*	*	0	0	chr1-6479605:6481190	chr1	6479605	6481190	chr1	6479904	6480650	chr1-6480605:6480985	chr1	6480605	6480985	chr1
chr1	6514154	6516181	0.088888888888889	0.24484330714649	0.142857142857143	0	0.431820614746107	0.197224259527442	68	4.14384747957225e-05	HypoHigh	chr1	6512157	6517243	Intron10	+	ESPN	protein_coding	chr1	6514154	6516181	1	0.398545025560362	CpG: 231	chr1	6514108	6516325	chr1	6514154	6516181	*	*	*	*	*	0	0	chr1-6514325:6516215	chr1	6514325	6516215	chr1	6514325	6516181	chr1-6516123:6516527	chr1	6516123	6516527	chr1
chr1	6976860	6980945	0.092436974789916	-0.233735019768201	1	0.875	0.181188147733199	0.353759374819711	42	3.03381440098921e-05	HypoLow	chr1	6885271	7151363	Intron3	+	CAMTA1	protein_coding	chr1	6976860	6980945	1	0.0153518332005472	*	*	*	*	*	0	0	*	*	*	*	*	0	0	chr1-6980400:6980550	chr1	6980400	6980550	chr1	6980400	6980550	chr1-6979252:6979492	chr1	6979252	6979492	chr1
chr1	7209534	7211185	0.269909502262443	-0.074066970179575	0.811764705882353	0.444444444444444	0.468546354076522	0.478092058921445	35	0.00085749778580494	HyperHigh	chr1	7151432	7309550	Intron4	+	CAMTA1	protein_coding	chr1	7209534	7211185	1	0.0104415689548312	*	*	*	*	*	0	0	*	*	*	*	*	0	0	chr1-7210725:7211190	chr1	7210725	7211190	chr1	7210725	7211185	chr1-7210841:7211125	chr1	7210841	7211125	chr1
chr1	7492577	7493040	0.266666666666666	-0.222222222222222	0.928571428571429	0.625	0.328808909576947	0.5	8	0.00489062405357086	HyperLow	chr1	7309687	7527889	Intron5	+	CAMTA1	protein_coding	chr1	7492577	7493040	1	0.0021218870587804	*	*	*	*	*	0	0	*	*	*	*	*	0	0	chr1-7492985:7493135	chr1	7492985	7493135	chr1	7492985	7493040	chr1-7492633:7493037	chr1	7492633	7493037	chr1
chr1	7565946	7566449	0.4	0.088024549790322	0.5	0.166666666666667	0.5	0.287706856188877	12	0.000712779021050405	HyperHigh	chr1	7527962	7700459	Intron6	+	CAMTA1	protein_coding	chr1	7565946	7566449	1	0.00291599274190276	*	*	*	*	*	0	0	*	*	*	*	*	0	0	chr1-7566285:7566495	chr1	7566285	7566495	chr1	7566285	7566449	*	*	*	*	*
chr1	7844353	7844649	0.363636363636364	0.046627412294515	0.5	0.0666666666666667	0.459594497828725	0.365265085000311	12	0.0090534295252533	HyperHigh	chr1	7843713	7844713	Promoter	+	PER3	protein_coding	chr1	7844353	7844649	1	0.296	CpG: 110	chr1	7843915	7845104	chr1	7844353	7844649	*	*	*	*	*	0	0	chr1-7844525:7844815	chr1	7844525	7844815	chr1	7844525	7844649	chr1-7844645:7845365	chr1	7844645	7845365	chr1
chr1	8112289	8116327	0.087121212121212	-0.252827109286206	1	0.897368421052632	0	0.328808909576947	43	1.94939305555253e-06	HypoLow	chr1	8089418	8181533	Intron2	+	RP11-431K24.1	lincRNA	chr1	8112289	8116327	1	0.0438365087119362	*	*	*	*	*	0	0	*	*	*	*	*	0	0	chr1-8116125:8116395	chr1	8116125	8116395	chr1	8116125	8116327	chr1-8116218:8116474	chr1	8116218	8116474	chr1
chr1	9243384	9243825	0.203619909502262	0.016230039631848	0.705882352941177	0.363636363636364	0.546268906136519	0.450548038384464	16	0.0342572584655048	HyperHigh	chr1	9242355	9243689	Intron2	-	RP3-510D11.1	lincRNA	chr1	9243384	9243689	0.691609977324263	0.228635682158921	CpG: 157	chr1	9242167	9243827	chr1	9243384	9243689	*	*	*	*	*	0	0	chr1-9241985:9244315	chr1	9241985	9244315	chr1	9243384	9243689	chr1-9243660:9244076	chr1	9243660	9244076	chr1
chr1	9243384	9243825	0.203619909502262	0.016230039631848	0.705882352941177	0.363636363636364	0.546268906136519	0.450548038384464	16	0.0342572584655048	HyperHigh	chr1	9243690	9243809	Exon2	-	RP3-510D11.1	lincRNA	chr1	9243690	9243809	0.26984126984127	1	CpG: 157	chr1	9242167	9243827	chr1	9243690	9243809	*	*	*	*	*	0	0	chr1-9241985:9244315	chr1	9241985	9244315	chr1	9243690	9243809	chr1-9243660:9244076	chr1	9243660	9244076	chr1
chr1	9243384	9243825	0.203619909502262	0.016230039631848	0.705882352941177	0.363636363636364	0.546268906136519	0.450548038384464	16	0.0342572584655048	HyperHigh	chr1	9243810	9262637	Intron1	-	RP3-510D11.1	lincRNA	chr1	9243810	9243825	0.0340136054421769	0.000796728103255962	CpG: 157	chr1	9242167	9243827	chr1	9243810	9243825	*	*	*	*	*	0	0	chr1-9241985:9244315	chr1	9241985	9244315	chr1	9243810	9243825	chr1-9243660:9244076	chr1	9243660	9244076	chr1
chr1	9243384	9243825	0.203619909502262	0.016230039631848	0.705882352941177	0.363636363636364	0.546268906136519	0.450548038384464	16	0.0342572584655048	HyperHigh	chr1	9242376	9243691	Intron1	+	RP3-510D11.2	lincRNA	chr1	9243384	9243691	0.696145124716553	0.233460076045627	CpG: 157	chr1	9242167	9243827	chr1	9243384	9243691	*	*	*	*	*	0	0	chr1-9241985:9244315	chr1	9241985	9244315	chr1	9243384	9243691	chr1-9243660:9244076	chr1	9243660	9244076	chr1
chr1	9243384	9243825	0.203619909502262	0.016230039631848	0.705882352941177	0.363636363636364	0.546268906136519	0.450548038384464	16	0.0342572584655048	HyperHigh	chr1	9243692	9243866	Exon2	+	RP3-510D11.2	lincRNA	chr1	9243692	9243825	0.301587301587302	0.764367816091954	CpG: 157	chr1	9242167	9243827	chr1	9243692	9243825	*	*	*	*	*	0	0	chr1-9241985:9244315	chr1	9241985	9244315	chr1	9243692	9243825	chr1-9243660:9244076	chr1	9243660	9244076	chr1
chr1	9887619	9888103	-0.256344403790224	-0.111107967939195	0.44949494949495	0.718253968253968	0.37527152789797	0.49609835788042	15	1.01195412087687e-05	HypoLow	*	*	*	InterGenic	*	*	*	*	*	*	*	*	*	*	*	*	*	0	0	*	*	*	*	*	0	0	chr1-9888000:9888235	chr1	9888000	9888235	chr1	9888000	9888103	chr1-9888013:9888303	chr1	9888013	9888303	chr1
chr1	9910785	9911244	0.320833333333333	-0.161041316218789	0.668181818181818	0.33300395256917	0.478491765742445	0.647920720874161	15	0.000926777754067786	HyperLow	chr1	9908334	9910834	LastExon	-	CTNNBIP1	protein_coding	chr1	9910785	9910834	0.106753812636166	0.0196	*	*	*	*	*	0	0	*	*	*	*	*	0	0	chr1-9910525:9911215	chr1	9910525	9911215	chr1	9910785	9910834	chr1-9910632:9911356	chr1	9910632	9911356	chr1
chr1	9910785	9911244	0.320833333333333	-0.161041316218789	0.668181818181818	0.33300395256917	0.478491765742445	0.647920720874161	15	0.000926777754067786	HyperLow	chr1	9910835	9931244	Intron5	-	CTNNBIP1	protein_coding	chr1	9910835	9911244	0.891067538126362	0.0200401783526875	*	*	*	*	*	0	0	*	*	*	*	*	0	0	chr1-9910525:9911215	chr1	9910525	9911215	chr1	9910835	9911215	chr1-9910632:9911356	chr1	9910632	9911356	chr1
chr1	10057547	10058295	0.153846153846154	0.228012811879681	0.2	0.0555555555555556	0.43056399904602	0.146498995640504	26	0.0242519585424679	HypoHigh	chr1	10057390	10067627	Intron1	+	RBP7	protein_coding	chr1	10057547	10058295	1	0.0730682817231611	CpG: 92	chr1	10057121	10058108	chr1	10057547	10058108	chr1:10057852-10058069	chr1	10057852	10058069	chr1	10057852	10058069	chr1-10056445:10058135	chr1	10056445	10058135	chr1	10057547	10058135	chr1-10057904:10058388	chr1	10057904	10058388	chr1
chr1	10698157	10699246	0.24561403508772	0.183984673204287	0.347826086956522	0.0952380952380952	0.501941033402761	0.306098611351497	28	4.75497083923741e-05	HyperHigh	chr1	10696661	10700116	LastExon	-	CASZ1	protein_coding	chr1	10698157	10699246	1	0.315195369030391	CpG: 48	chr1	10698299	10698910	chr1	10698299	10698910	*	*	*	*	*	0	0	chr1-10698260:10701995	chr1	10698260	10701995	chr1	10698260	10699246	chr1-10699242:10699825	chr1	10699242	10699825	chr1
chr1	10698157	10699246	0.24561403508772	0.183984673204287	0.347826086956522	0.0952380952380952	0.501941033402761	0.306098611351497	28	4.75497083923741e-05	HyperHigh	chr1	10698297	10699297	Promoter	+	RP4-734G22.3	antisense	chr1	10698297	10699246	0.871441689623508	0.949	CpG: 48	chr1	10698299	10698910	chr1	10698299	10698910	*	*	*	*	*	0	0	chr1-10698260:10701995	chr1	10698260	10701995	chr1	10698297	10699246	chr1-10699242:10699825	chr1	10699242	10699825	chr1
chr1	10747819	10749119	-0.220833333333333	-0.111005132778134	0.357142857142857	0.666666666666667	0.453654682481227	0.518885569154274	26	0.0208301687914437	HypoLow	chr1	10725629	10753930	Intron4	-	CASZ1	protein_coding	chr1	10747819	10749119	1	0.0459347726228755	*	*	*	*	*	0	0	*	*	*	*	*	0	0	chr1-10748460:10748750	chr1	10748460	10748750	chr1	10748460	10748750	chr1-10747898:10748274	chr1	10747898	10748274	chr1
chr1	10821369	10825387	0.073653846153846	-0.238044424477421	0.933333333333333	0.897368421052632	0.197224259527442	0.432438554997761	67	0.000495568681088263	HypoLow	chr1	10820915	10856620	Intron1	-	CASZ1	protein_coding	chr1	10821369	10825387	1	0.112533258647248	*	*	*	*	*	0	0	chr1:10821450-10821813	chr1	10821450	10821813	chr1	10821450	10821813	chr1-10825205:10825395	chr1	10825205	10825395	chr1	10825205	10825387	chr1-10825094:10825578	chr1	10825094	10825578	chr1
chr1	10895173	10896364	0.337301587301588	0.0223931543909475	0.723809523809523	0.218253968253968	0.490770535709097	0.444957589191678	35	7.61734426503322e-06	HyperHigh	*	*	*	InterGenic	*	*	*	*	*	*	*	*	CpG: 20	chr1	10895895	10896117	chr1	10895895	10896117	*	*	*	*	*	0	0	chr1-10895985:10896475	chr1	10895985	10896475	chr1	10895985	10896364	chr1-10896137:10896361	chr1	10896137	10896361	chr1
chr1	10961102	10961711	-0.6	-0.017551586800059	0.333333333333333	0.875	0.333333333333333	0.323650198151556	12	0.000104106946050919	HypoHigh	*	*	*	InterGenic	*	*	*	*	*	*	*	*	*	*	*	*	*	0	0	*	*	*	*	*	0	0	chr1-10960785:10961810	chr1	10960785	10961810	chr1	10961102	10961711	chr1-10961598:10961842	chr1	10961598	10961842	chr1
chr1	11095307	11096918	-0.0833333333333335	0.27400612883285	0.894444444444444	1	0.368352163123342	0	27	0.000175894107225477	HypoHigh	chr1	11094964	11097749	Intron7	-	MASP2	protein_coding	chr1	11095307	11096918	1	0.578456014362657	*	*	*	*	*	0	0	*	*	*	*	*	0	0	*	*	*	*	*	0	0	chr1-11095382:11095814	chr1	11095382	11095814	chr1
chr1	11546639	11548549	-0.166666666666667	0.33454408694429	0.588235294117647	0.761904761904762	0.61412366439237	0.306098611351497	22	0.0622446555466734	HypoHigh	chr1	11539430	11561046	Intron1	+	PTCHD2	protein_coding	chr1	11546639	11548549	1	0.088360473723168	*	*	*	*	*	0	0	*	*	*	*	*	0	0	chr1-11548205:11548515	chr1	11548205	11548515	chr1	11548205	11548515	chr1-11547381:11547885	chr1	11547381	11547885	chr1
chr1	11561341	11562133	0.358333333333333	-0.028320833573719	0.769230769230769	0.4	0.507309364962454	0.575798891191493	30	0.000151530545601741	HyperHigh	chr1	11561047	11562145	Exon2	+	PTCHD2	protein_coding	chr1	11561341	11562133	1	0.721311475409836	CpG: 80	chr1	11561366	11562156	chr1	11561366	11562133	*	*	*	*	*	0	0	chr1-11561545:11561970	chr1	11561545	11561970	chr1	11561545	11561970	chr1-11561724:11562000	chr1	11561724	11562000	chr1
chr1	11863068	11864042	0.43931623931624	0.057272905697295	0.718253968253968	0.23015873015873	0.501323809620441	0.459657142953774	23	1.56282437230071e-06	HyperHigh	chr1	11862938	11863186	Exon2	-	MTHFR	protein_coding	chr1	11863068	11863186	0.121149897330595	0.475806451612903	*	*	*	*	*	0	0	*	*	*	*	*	0	0	chr1-11863105:11863495	chr1	11863105	11863495	chr1	11863105	11863186	chr1-11863183:11863779	chr1	11863183	11863779	chr1
chr1	11863068	11864042	0.43931623931624	0.057272905697295	0.718253968253968	0.23015873015873	0.501323809620441	0.459657142953774	23	1.56282437230071e-06	HyperHigh	chr1	11863187	11865944	Intron1	-	MTHFR	protein_coding	chr1	11863187	11864042	0.87782340862423	0.310119695321001	*	*	*	*	*	0	0	*	*	*	*	*	0	0	chr1-11863525:11863930	chr1	11863525	11863930	chr1	11863525	11863930	chr1-11864033:11864377	chr1	11864033	11864377	chr1
chr1	12256560	12257192	0.186607142857143	0.363641095563331	0.342857142857143	0.16025641025641	0.628878825533463	0.288262326418938	13	0.0729253030365484	HypoHigh	chr1	12254676	12262023	Intron8	+	TNFRSF1B	protein_coding	chr1	12256560	12257192	1	0.0860215053763441	*	*	*	*	*	0	0	*	*	*	*	*	0	0	chr1-12256465:12257110	chr1	12256465	12257110	chr1	12256560	12257110	chr1-12256955:12257087	chr1	12256955	12257087	chr1
chr1	13794898	13795571	0.297979797979798	-0.363636363636364	0.916666666666667	0.666666666666667	0.240642698295787	0.711312522031639	14	3.83218848581573e-05	HyperLow	*	*	*	InterGenic	*	*	*	*	*	*	*	*	*	*	*	*	*	0	0	*	*	*	*	*	0	0	chr1-13795400:13795550	chr1	13795400	13795550	chr1	13795400	13795550	chr1-13795550:13796452	chr1	13795550	13796452	chr1
chr1	13838183	13839291	0.252331002331003	-0.0831354054387605	0.860576923076923	0.352272727272728	0.306098611351497	0.358139142380152	15	0.00536251171881301	HyperHigh	chr1	13802568	13839457	Intron1	-	LRRC38	protein_coding	chr1	13838183	13839291	1	0.0300360541082708	*	*	*	*	*	0	0	*	*	*	*	*	0	0	chr1-13838885:13839395	chr1	13838885	13839395	chr1	13838885	13839291	chr1-13839159:13839503	chr1	13839159	13839503	chr1
chr1	13838183	13839291	0.252331002331003	-0.0831354054387605	0.860576923076923	0.352272727272728	0.306098611351497	0.358139142380152	15	0.00536251171881301	HyperHigh	chr1	13838714	13839714	Promoter	+	RP4-597A16.2	antisense	chr1	13838714	13839291	0.520758122743682	0.577	*	*	*	*	*	0	0	*	*	*	*	*	0	0	chr1-13838885:13839395	chr1	13838885	13839395	chr1	13838885	13839291	chr1-13839159:13839503	chr1	13839159	13839503	chr1
chr1	13850250	13850946	0.303921568627451	-0.137899252291468	0.833333333333333	0.555555555555556	0.459594497828725	0.597493750120193	10	0.0040878469147404	HyperLow	*	*	*	InterGenic	*	*	*	*	*	*	*	*	*	*	*	*	*	0	0	*	*	*	*	*	0	0	chr1-13850585:13851075	chr1	13850585	13851075	chr1	13850585	13850946	chr1-13850715:13850859	chr1	13850715	13850859	chr1
chr1	14140014	14140344	0.345238095238096	0.017551586800059	0.866666666666667	0.466666666666667	0.507309364962454	0.41355684389223	10	0.0466040199441013	HyperHigh	chr1	14075983	14142921	Intron6	+	PRDM2	protein_coding	chr1	14140014	14140344	1	0.004929935163883	*	*	*	*	*	0	0	*	*	*	*	*	0	0	chr1-14140180:14140430	chr1	14140180	14140430	chr1	14140180	14140344	chr1-14140187:14140437	chr1	14140187	14140437	chr1
chr1	14924610	14925469	0.101190476190476	0.329350780488743	0.136363636363636	0	0.446554754643171	0.0832940976110618	30	7.03602548293797e-05	HypoHigh	chr1	14924199	14925199	Promoter	+	KAZN	protein_coding	chr1	14924610	14925199	0.685681024447031	0.589	CpG: 119	chr1	14924610	14925993	chr1	14924610	14925199	*	*	*	*	*	0	0	chr1-14925085:14926275	chr1	14925085	14926275	chr1	14925085	14925199	chr1-14925181:14926036	chr1	14925181	14926036	chr1
chr1	14924610	14925469	0.101190476190476	0.329350780488743	0.136363636363636	0	0.446554754643171	0.0832940976110618	30	7.03602548293797e-05	HypoHigh	chr1	14925200	14925719	FirstExon	+	KAZN	protein_coding	chr1	14925200	14925469	0.313154831199069	0.518304431599229	CpG: 119	chr1	14924610	14925993	chr1	14925200	14925469	*	*	*	*	*	0	0	chr1-14925085:14926275	chr1	14925085	14926275	chr1	14925200	14925469	chr1-14925458:14926837	chr1	14925458	14926837	chr1
chr1	15129308	15131559	-0.0745614035087719	0.307309364962454	0.85	1	0.333333333333333	0	30	0.00259141585368535	HypoHigh	chr1	14925720	15287179	Intron1	+	KAZN	protein_coding	chr1	15129308	15131559	1	0.00622753894632586	*	*	*	*	*	0	0	*	*	*	*	*	0	0	chr1-15131025:15131435	chr1	15131025	15131435	chr1	15131025	15131435	chr1-15131231:15131429	chr1	15131231	15131429	chr1
chr1	15146839	15147106	0.322619047619048	-0.257681848257516	0.886904761904762	0.488888888888888	0.361991752755953	0.583876389129274	7	0.0303479417395604	HyperLow	chr1	14925720	15287179	Intron1	+	KAZN	protein_coding	chr1	15146839	15147106	1	0.000738672989191029	*	*	*	*	*	0	0	*	*	*	*	*	0	0	chr1-15146905:15147195	chr1	15146905	15147195	chr1	15146905	15147106	chr1-15146963:15147163	chr1	15146963	15147163	chr1
chr1	15152613	15153192	-0.325	-0.225274019192232	0.1875	0.626373626373626	0.434734802805811	0.630042436974761	13	0.00929782465843904	HypoLow	chr1	14925720	15287179	Intron1	+	KAZN	protein_coding	chr1	15152613	15153192	1	0.00160184142599852	*	*	*	*	*	0	0	*	*	*	*	*	0	0	chr1-15152685:15153055	chr1	15152685	15153055	chr1	15152685	15153055	chr1-15152795:15153051	chr1	15152795	15153051	chr1
chr1	15550791	15551373	0.375	-0.285314754815423	0.916666666666667	0.352941176470588	0.181188147733199	0.468546354076522	10	0.00143701628194194	HyperLow	*	*	*	InterGenic	*	*	*	*	*	*	*	*	*	*	*	*	*	0	0	*	*	*	*	*	0	0	chr1-15551225:15551375	chr1	15551225	15551375	chr1	15551225	15551373	chr1-15550949:15551219	chr1	15550949	15551219	chr1
chr1	16553266	16555078	0.228571428571429	-0.0335042655020591	0.7	0.368421052631579	0.5	0.510164352252494	42	0.000125078418019757	HyperHigh	*	*	*	InterGenic	*	*	*	*	*	*	*	*	CpG: 37	chr1	16553326	16553660	chr1	16553326	16553660	chr1:16553276-16553594	chr1	16553276	16553594	chr1	16553276	16553594	chr1-16554205:16555155	chr1	16554205	16555155	chr1	16554205	16555078	chr1-16555057:16555577	chr1	16555057	16555577	chr1
chr1	16973801	16974803	0.310281517747858	0.229693253762209	0.6	0.193548387096774	0.730156190244276	0.606014167885402	42	7.88751664822979e-08	HyperHigh	*	*	*	InterGenic	*	*	*	*	*	*	*	*	CpG: 133	chr1	16973485	16975045	chr1	16973801	16974803	*	*	*	*	*	0	0	chr1-16974225:16974655	chr1	16974225	16974655	chr1	16974225	16974655	chr1-16974395:16974795	chr1	16974395	16974795	chr1
chr1	17018823	17020468	0.101577528727479	0.219012326184055	0.416666666666667	0.258598521375764	0.691792025687691	0.483321900708741	55	9.01511756836002e-06	HypoHigh	chr1	17017790	17022925	Intron10	-	ESPNP	pseudogene	chr1	17018823	17020468	1	0.320350535540409	CpG: 231	chr1	17018683	17020959	chr1	17018823	17020468	chr1:17020007-17020088	chr1	17020007	17020088	chr1	17020007	17020088	chr1-17019165:17020655	chr1	17019165	17020655	chr1	17019165	17020468	chr1-17020277:17020820	chr1	17020277	17020820	chr1
chr1	17025984	17027345	0.112121212121212	0.264929757432433	0.25	0.152173913043478	0.609540834262569	0.342681765731825	40	0.00124630058950793	HypoHigh	chr1	17025921	17026116	Exon8	-	ESPNP	pseudogene	chr1	17025984	17026116	0.0969875091844232	0.676923076923077	CpG: 181	chr1	17025923	17027942	chr1	17025984	17026116	*	*	*	*	*	0	0	chr1-17025860:17026655	chr1	17025860	17026655	chr1	17025984	17026116	chr1-17026099:17026163	chr1	17026099	17026163	chr1
chr1	17025984	17027345	0.112121212121212	0.264929757432433	0.25	0.152173913043478	0.609540834262569	0.342681765731825	40	0.00124630058950793	HypoHigh	chr1	17026117	17026353	Intron7	-	ESPNP	pseudogene	chr1	17026117	17026353	0.173401910360029	1	CpG: 181	chr1	17025923	17027942	chr1	17026117	17026353	*	*	*	*	*	0	0	chr1-17025860:17026655	chr1	17025860	17026655	chr1	17026117	17026353	chr1-17026336:17026980	chr1	17026336	17026980	chr1
chr1	17025984	17027345	0.112121212121212	0.264929757432433	0.25	0.152173913043478	0.609540834262569	0.342681765731825	40	0.00124630058950793	HypoHigh	chr1	17026354	17026515	Exon7	-	ESPNP	pseudogene	chr1	17026354	17026515	0.118295371050698	1	CpG: 181	chr1	17025923	17027942	chr1	17026354	17026515	*	*	*	*	*	0	0	chr1-17025860:17026655	chr1	17025860	17026655	chr1	17026354	17026515	chr1-17026500:17026944	chr1	17026500	17026944	chr1
chr1	17025984	17027345	0.112121212121212	0.264929757432433	0.25	0.152173913043478	0.609540834262569	0.342681765731825	40	0.00124630058950793	HypoHigh	chr1	17026516	17029195	Intron6	-	ESPNP	pseudogene	chr1	17026516	17027345	0.609110947832476	0.309443822321762	CpG: 181	chr1	17025923	17027942	chr1	17026516	17027345	chr1:17027024-17027386	chr1	17027024	17027386	chr1	17027024	17027345	chr1-17026980:17029655	chr1	17026980	17029655	chr1	17026980	17027345	chr1-17027298:17027702	chr1	17027298	17027702	chr1
chr1	17033826	17034773	0.0588235294117647	0.234087508763451	0.0885579937304075	0.0230646871686108	0.454041930442379	0.190884021864171	37	0.00191459258195621	HypoHigh	chr1	17033783	17033914	Exon4	-	ESPNP	pseudogene	chr1	17033826	17033914	0.0929250263991552	0.67175572519084	CpG: 89	chr1	17033768	17034728	chr1	17033826	17033914	*	*	*	*	*	0	0	chr1-17033200:17033855	chr1	17033200	17033855	chr1	17033826	17033855	chr1-17033899:17034747	chr1	17033899	17034747	chr1
chr1	17033826	17034773	0.0588235294117647	0.234087508763451	0.0885579937304075	0.0230646871686108	0.454041930442379	0.190884021864171	37	0.00191459258195621	HypoHigh	chr1	17033915	17034039	Intron3	-	ESPNP	pseudogene	chr1	17033915	17034039	0.130939809926082	1	CpG: 89	chr1	17033768	17034728	chr1	17033915	17034039	*	*	*	*	*	0	0	chr1-17033925:17034795	chr1	17033925	17034795	chr1	17033925	17034039	chr1-17034032:17034971	chr1	17034032	17034971	chr1
chr1	17033826	17034773	0.0588235294117647	0.234087508763451	0.0885579937304075	0.0230646871686108	0.454041930442379	0.190884021864171	37	0.00191459258195621	HypoHigh	chr1	17034040	17034222	Exon3	-	ESPNP	pseudogene	chr1	17034040	17034222	0.192185850052798	1	CpG: 89	chr1	17033768	17034728	chr1	17034040	17034222	*	*	*	*	*	0	0	chr1-17033925:17034795	chr1	17033925	17034795	chr1	17034040	17034222	chr1-17034218:17034648	chr1	17034218	17034648	chr1
chr1	17033826	17034773	0.0588235294117647	0.234087508763451	0.0885579937304075	0.0230646871686108	0.454041930442379	0.190884021864171	37	0.00191459258195621	HypoHigh	chr1	17034223	17034386	Intron2	-	ESPNP	pseudogene	chr1	17034223	17034386	0.172122492080253	1	CpG: 89	chr1	17033768	17034728	chr1	17034223	17034386	*	*	*	*	*	0	0	chr1-17033925:17034795	chr1	17033925	17034795	chr1	17034223	17034386	chr1-17034338:17034823	chr1	17034338	17034823	chr1
chr1	17033826	17034773	0.0588235294117647	0.234087508763451	0.0885579937304075	0.0230646871686108	0.454041930442379	0.190884021864171	37	0.00191459258195621	HypoHigh	chr1	17034387	17034573	Exon2	-	ESPNP	pseudogene	chr1	17034387	17034573	0.196409714889124	1	CpG: 89	chr1	17033768	17034728	chr1	17034387	17034573	*	*	*	*	*	0	0	chr1-17033925:17034795	chr1	17033925	17034795	chr1	17034387	17034573	chr1-17034554:17034804	chr1	17034554	17034804	chr1
chr1	17033826	17034773	0.0588235294117647	0.234087508763451	0.0885579937304075	0.0230646871686108	0.454041930442379	0.190884021864171	37	0.00191459258195621	HypoHigh	chr1	17034574	17046458	Intron1	-	ESPNP	pseudogene	chr1	17034574	17034773	0.210137275607181	0.0167452036351397	CpG: 89	chr1	17033768	17034728	chr1	17034574	17034728	*	*	*	*	*	0	0	chr1-17033925:17034795	chr1	17033925	17034795	chr1	17034574	17034773	chr1-17034554:17034804	chr1	17034554	17034804	chr1
chr1	17085646	17086691	0.273366013071895	0.165580112752769	0.555487804878049	0.192234848484849	0.760480235311104	0.653056819964958	43	3.17456032345979e-07	HyperHigh	chr1	17085368	17086368	Promoter	-	MST1L	pseudogene	chr1	17085646	17086368	0.690909090909091	0.722	CpG: 128	chr1	17085411	17086974	chr1	17085646	17086368	*	*	*	*	*	0	0	chr1-17086145:17086295	chr1	17086145	17086295	chr1	17086145	17086295	chr1-17085879:17086503	chr1	17085879	17086503	chr1
chr1	17293658	17294300	-0.413623141564318	0.170982468419034	0.337662337662337	0.798076923076923	0.583333333333333	0.361654166907053	9	0.0180440947460137	HypoHigh	chr1	17293067	17294697	Intron30	+	CROCC	protein_coding	chr1	17293658	17294300	1	0.393865030674847	*	*	*	*	*	0	0	*	*	*	*	*	0	0	chr1-17293580:17294075	chr1	17293580	17294075	chr1	17293658	17294075	chr1-17293977:17294567	chr1	17293977	17294567	chr1
chr1	17475912	17476658	0.176470588235294	-0.219410414046784	0.869565217391304	0.75	0.317331360636261	0.436432222745668	22	0.0258745690348719	HypoLow	*	*	*	InterGenic	*	*	*	*	*	*	*	*	CpG: 37	chr1	17475702	17476075	chr1	17475912	17476075	*	*	*	*	*	0	0	chr1-17476265:17476630	chr1	17476265	17476630	chr1	17476265	17476630	chr1-17476430:17476890	chr1	17476430	17476890	chr1
chr1	17956325	17957641	-0.206043956043956	0	0.206293706293706	0.544444444444445	0.317453760464222	0.45698353148489	19	0.0246082245751886	HypoHigh	chr1	17953999	17958815	Intron15	+	ARHGEF10L	protein_coding	chr1	17956325	17957641	1	0.273255813953488	*	*	*	*	*	0	0	chr1:17956441-17957463	chr1	17956441	17957463	chr1	17956441	17957463	chr1-17957285:17957750	chr1	17957285	17957750	chr1	17957285	17957641	chr1-17957531:17958111	chr1	17957531	17958111	chr1
chr1	18381952	18385105	0.111455108359133	-0.238763010885932	1	0.846153846153846	0.240642698295787	0.5	27	0.0131159386705384	HypoLow	*	*	*	InterGenic	*	*	*	*	*	*	*	*	*	*	*	*	*	0	0	*	*	*	*	*	0	0	chr1-18385060:18385295	chr1	18385060	18385295	chr1	18385060	18385105	chr1-18384924:18385426	chr1	18384924	18385426	chr1
chr1	18901566	18904203	0.119047619047619	-0.227903655780735	0.9	0.823529411764706	0.306098611351497	0.482205555876069	30	0.064911235085147	HypoLow	*	*	*	InterGenic	*	*	*	*	*	*	*	*	*	*	*	*	*	0	0	*	*	*	*	*	0	0	chr1-18903645:18903915	chr1	18903645	18903915	chr1	18903645	18903915	chr1-18902876:18903266	chr1	18902876	18903266	chr1
chr1	18956611	18964325	0.193722943722943	0.232105933569132	0.275252525252526	0.0571895424836601	0.553706750950892	0.288618872485741	183	3.86326855692644e-25	HypoHigh	chr1	18957014	18958014	Promoter	+	PAX7	protein_coding	chr1	18957014	18958014	0.129634430904848	1	CpG: 205	chr1	18956895	18959829	chr1	18957014	18958014	*	*	*	*	*	0	0	chr1-18957365:18959115	chr1	18957365	18959115	chr1	18957365	18958014	chr1-18957933:18958269	chr1	18957933	18958269	chr1
chr1	18956611	18964325	0.193722943722943	0.232105933569132	0.275252525252526	0.0571895424836601	0.553706750950892	0.288618872485741	183	3.86326855692644e-25	HypoHigh	chr1	18958015	18958182	FirstExon	+	PAX7	protein_coding	chr1	18958015	18958182	0.0216489499611097	1	CpG: 205	chr1	18956895	18959829	chr1	18958015	18958182	*	*	*	*	*	0	0	chr1-18957365:18959115	chr1	18957365	18959115	chr1	18958015	18958182	chr1-18957933:18958269	chr1	18957933	18958269	chr1
chr1	18956611	18964325	0.193722943722943	0.232105933569132	0.275252525252526	0.0571895424836601	0.553706750950892	0.288618872485741	183	3.86326855692644e-25	HypoHigh	chr1	18958183	18960796	Intron1	+	PAX7	protein_coding	chr1	18958183	18960796	0.338734767954369	1	CpG: 205	chr1	18956895	18959829	chr1	18958183	18959829	*	*	*	*	*	0	0	chr1-18960645:18960795	chr1	18960645	18960795	chr1	18960645	18960795	chr1-18959679:18960383	chr1	18959679	18960383	chr1
chr1	18956611	18964325	0.193722943722943	0.232105933569132	0.275252525252526	0.0571895424836601	0.553706750950892	0.288618872485741	183	3.86326855692644e-25	HypoHigh	chr1	18960797	18961032	Exon2	+	PAX7	protein_coding	chr1	18960797	18961032	0.0304640912626394	1	*	*	*	*	*	0	0	*	*	*	*	*	0	0	chr1-18961025:18961795	chr1	18961025	18961795	chr1	18961025	18961032	chr1-18957826:18961254	chr1	18957826	18961254	chr1
chr1	18956611	18964325	0.193722943722943	0.232105933569132	0.275252525252526	0.0571895424836601	0.553706750950892	0.288618872485741	183	3.86326855692644e-25	HypoHigh	chr1	18961033	18961604	Intron2	+	PAX7	protein_coding	chr1	18961033	18961604	0.0740212600466684	1	*	*	*	*	*	0	0	*	*	*	*	*	0	0	chr1-18961025:18961795	chr1	18961025	18961795	chr1	18961033	18961604	chr1-18961535:18963737	chr1	18961535	18963737	chr1
chr1	18956611	18964325	0.193722943722943	0.232105933569132	0.275252525252526	0.0571895424836601	0.553706750950892	0.288618872485741	183	3.86326855692644e-25	HypoHigh	chr1	18961605	18961734	Exon3	+	PAX7	protein_coding	chr1	18961605	18961734	0.0167228415867254	1	*	*	*	*	*	0	0	*	*	*	*	*	0	0	chr1-18961025:18961795	chr1	18961025	18961795	chr1	18961605	18961734	chr1-18961535:18963737	chr1	18961535	18963737	chr1
chr1	18956611	18964325	0.193722943722943	0.232105933569132	0.275252525252526	0.0571895424836601	0.553706750950892	0.288618872485741	183	3.86326855692644e-25	HypoHigh	chr1	18961735	18962730	Intron3	+	PAX7	protein_coding	chr1	18961735	18962730	0.128986258750324	1	*	*	*	*	*	0	0	*	*	*	*	*	0	0	chr1-18962345:18962755	chr1	18962345	18962755	chr1	18962345	18962730	chr1-18962691:18963460	chr1	18962691	18963460	chr1
chr1	18956611	18964325	0.193722943722943	0.232105933569132	0.275252525252526	0.0571895424836601	0.553706750950892	0.288618872485741	183	3.86326855692644e-25	HypoHigh	chr1	18962731	18962865	Exon4	+	PAX7	protein_coding	chr1	18962731	18962865	0.0173710137412497	1	CpG: 56	chr1	18962842	18963481	chr1	18962842	18962865	*	*	*	*	*	0	0	chr1-18962785:18963575	chr1	18962785	18963575	chr1	18962785	18962865	chr1-18962851:18963231	chr1	18962851	18963231	chr1
chr1	18956611	18964325	0.193722943722943	0.232105933569132	0.275252525252526	0.0571895424836601	0.553706750950892	0.288618872485741	183	3.86326855692644e-25	HypoHigh	chr1	18962866	19018247	Intron4	+	PAX7	protein_coding	chr1	18962866	18964325	0.189136634690174	0.0263447752839421	CpG: 20	chr1	18964180	18964401	chr1	18964180	18964325	*	*	*	*	*	0	0	chr1-18963900:18964455	chr1	18963900	18964455	chr1	18963900	18964325	chr1-18964253:18964513	chr1	18964253	18964513	chr1
chr1	18994772	18997465	0.0634615384615385	-0.352200775434313	0.8875	0.8625	0.228658419422619	0.551881646820207	25	0.144147508437136	HypoLow	chr1	18962866	19018247	Intron4	+	PAX7	protein_coding	chr1	18994772	18997465	1	0.0486267853595999	*	*	*	*	*	0	0	*	*	*	*	*	0	0	chr1-18997100:18997955	chr1	18997100	18997955	chr1	18997100	18997465	chr1-18996986:18997230	chr1	18996986	18997230	chr1
chr1	19043367	19043973	0.164835164835165	0.260240833209582	0.25	0.0555555555555556	0.640642698295787	0.365265085000311	18	0.0225719893793178	HypoHigh	chr1	19029791	19062125	Intron7	+	PAX7	protein_coding	chr1	19043367	19043973	1	0.0187418816106884	CpG: 51	chr1	19043390	19043828	chr1	19043390	19043828	*	*	*	*	*	0	0	chr1-19043065:19044235	chr1	19043065	19044235	chr1	19043367	19043973	chr1-19043559:19043711	chr1	19043559	19043711	chr1
chr1	19371590	19371987	-0.266361556064073	-0.096258963889695	0.247474747474747	0.605263157894737	0.458289014656807	0.635213020743189	11	0.0354629890233605	HypoHigh	*	*	*	InterGenic	*	*	*	*	*	*	*	*	*	*	*	*	*	0	0	*	*	*	*	*	0	0	chr1-19371805:19372275	chr1	19371805	19372275	chr1	19371805	19371987	chr1-19371966:19372330	chr1	19371966	19372330	chr1
chr1	19614998	19615649	0.241968557758031	0.498880254062286	0.41875	0.0769230769230769	0.633985335905057	0.197224259527442	21	0.00169844431476392	HyperHigh	chr1	19614990	19615744	FirstExon	-	AKR7A3	protein_coding	chr1	19614998	19615649	1	0.863395225464191	CpG: 73	chr1	19614998	19615660	chr1	19614998	19615649	*	*	*	*	*	0	0	chr1-19615465:19615715	chr1	19615465	19615715	chr1	19615465	19615649	chr1-19615531:19615991	chr1	19615531	19615991	chr1
chr1	19686499	19687256	0.176470588235294	-0.228012811879681	1	0.823529411764706	0	0.45698353148489	14	9.84872371961895e-05	HypoLow	chr1	19684058	19705033	Intron5	-	CAPZB	protein_coding	chr1	19686499	19687256	1	0.0360905840286055	*	*	*	*	*	0	0	*	*	*	*	*	0	0	chr1-19686445:19687135	chr1	19686445	19687135	chr1	19686499	19687135	chr1-19687008:19687129	chr1	19687008	19687129	chr1
chr1	19971708	19972719	0.179271708683473	-0.236447386573405	0.916666666666667	0.761904761904762	0.307309364962454	0.583333333333333	28	0.000757884173349229	HypoLow	chr1	19923604	19981504	Intron1	+	MINOS1-NBL1	protein_coding	chr1	19971708	19972719	1	0.0174611398963731	CpG: 153	chr1	19970255	19971923	chr1	19971708	19971923	*	*	*	*	*	0	0	chr1-19970945:19973235	chr1	19970945	19973235	chr1	19971708	19972719	chr1-19972646:19973026	chr1	19972646	19973026	chr1
chr1	19971708	19972719	0.179271708683473	-0.236447386573405	0.916666666666667	0.761904761904762	0.307309364962454	0.583333333333333	28	0.000757884173349229	HypoLow	chr1	19970941	19981504	Intron1	+	NBL1	protein_coding	chr1	19971708	19972719	1	0.095711445612042	CpG: 153	chr1	19970255	19971923	chr1	19971708	19971923	*	*	*	*	*	0	0	chr1-19970945:19973235	chr1	19970945	19973235	chr1	19971708	19972719	chr1-19972646:19973026	chr1	19972646	19973026	chr1
chr1	19992023	19992654	0.142857142857143	0.202135202747654	0.214285714285714	0.0572580645161291	0.521267883652915	0.293843670716744	23	0.00216638110986029	HypoHigh	chr1	19991780	19992960	FirstExon	+	HTR6	protein_coding	chr1	19992023	19992654	1	0.534745762711864	CpG: 160	chr1	19991146	19992788	chr1	19992023	19992654	*	*	*	*	*	0	0	chr1-19991865:19992715	chr1	19991865	19992715	chr1	19992023	19992654	chr1-19992368:19993148	chr1	19992368	19993148	chr1
chr1	20692603	20693396	0.289772727272727	0.302775740472558	0.368421052631579	0.0384615384615385	0.655639062229566	0.287706856188877	28	2.37266020369595e-05	HyperHigh	chr1	20688888	20700087	Intron10	-	RP4-749H3.1	lincRNA	chr1	20692603	20693396	1	0.0708098937405125	CpG: 110	chr1	20692582	20693534	chr1	20692603	20693396	chr1:20693127-20693202	chr1	20693127	20693202	chr1	20693127	20693202	chr1-20693045:20693415	chr1	20693045	20693415	chr1	20693045	20693396	chr1-20693333:20693617	chr1	20693333	20693617	chr1
chr1	20810666	20812169	0.0833333333333333	0.293321649575704	0.142857142857143	0	0.425871145606372	0	48	4.57113852883445e-07	HypoHigh	chr1	20810213	20811706	Intron1	-	CAMK2N1	protein_coding	chr1	20810666	20811706	0.691949434464404	0.696584058941728	CpG: 245	chr1	20810462	20813511	chr1	20810666	20811706	*	*	*	*	*	0	0	chr1-20810020:20811875	chr1	20810020	20811875	chr1	20810666	20811706	chr1-20811689:20812413	chr1	20811689	20812413	chr1
chr1	20810666	20812169	0.0833333333333333	0.293321649575704	0.142857142857143	0	0.425871145606372	0	48	4.57113852883445e-07	HypoHigh	chr1	20811707	20812713	FirstExon	-	CAMK2N1	protein_coding	chr1	20811707	20812169	0.307385229540918	0.459244532803181	CpG: 245	chr1	20810462	20813511	chr1	20811707	20812169	*	*	*	*	*	0	0	chr1-20811985:20814155	chr1	20811985	20814155	chr1	20811985	20812169	chr1-20812164:20812688	chr1	20812164	20812688	chr1
chr1	20879285	20880999	0.125925925925926	0.254734835502873	0.2	0.05	0.5	0.272229696105007	46	5.51097888699882e-05	HypoHigh	chr1	20878932	20881512	FirstExon	+	FAM43B	protein_coding	chr1	20879285	20880999	1	0.664341085271318	CpG: 188	chr1	20878894	20880592	chr1	20879285	20880592	*	*	*	*	*	0	0	chr1-20880845:20881915	chr1	20880845	20881915	chr1	20880845	20880999	chr1-20880860:20881150	chr1	20880860	20881150	chr1
chr1	21011710	21012201	0.235294117647059	0.478457130258178	0.333333333333333	0.133333333333333	0.5	0	12	0.000794789790470136	HyperHigh	chr1	21011514	21012538	Intron9	-	KIF17	protein_coding	chr1	21011710	21012201	1	0.4794921875	*	*	*	*	*	0	0	*	*	*	*	*	0	0	chr1-21011925:21012255	chr1	21011925	21012255	chr1	21011925	21012201	chr1-21011701:21011941	chr1	21011701	21011941	chr1
chr1	21702551	21706774	-0.0964912280701751	0.240309390935439	0.857142857142857	1	0.45698353148489	0.216674140549451	34	0.00122542625780222	HypoHigh	*	*	*	InterGenic	*	*	*	*	*	*	*	*	*	*	*	*	*	0	0	*	*	*	*	*	0	0	chr1-21706185:21706335	chr1	21706185	21706335	chr1	21706185	21706335	chr1-21706674:21707034	chr1	21706674	21707034	chr1
chr1	21754187	21755234	0.317919799498747	0.364395005624152	0.447222222222222	0.0690476190476191	0.698562304812421	0.27397603162912	25	2.74520032510755e-06	HyperHigh	*	*	*	InterGenic	*	*	*	*	*	*	*	*	CpG: 121	chr1	21754797	21755995	chr1	21754797	21755234	*	*	*	*	*	0	0	chr1-21754405:21755355	chr1	21754405	21755355	chr1	21754405	21755234	chr1-21753971:21754865	chr1	21753971	21754865	chr1
chr1	21763070	21763356	0.256578947368421	0.343204978317885	0.416666666666667	0.0596491228070175	0.741193287237358	0.372524615837034	13	0.00490785522936583	HyperHigh	*	*	*	InterGenic	*	*	*	*	*	*	*	*	CpG: 34	chr1	21763070	21763416	chr1	21763070	21763356	*	*	*	*	*	0	0	chr1-21763140:21763515	chr1	21763140	21763515	chr1	21763140	21763356	chr1-21763040:21763298	chr1	21763040	21763298	chr1
chr1	21795208	21795647	0.37693675889328	-0.23966322216998	0.668181818181818	0.340460526315789	0.327004442382148	0.605070484055211	11	0.00507539231527393	HyperLow	chr1	21795181	21795390	Exon6	+	NBPF3	protein_coding	chr1	21795208	21795390	0.414578587699317	0.870813397129187	*	*	*	*	*	0	0	*	*	*	*	*	0	0	chr1-21795160:21795415	chr1	21795160	21795415	chr1	21795208	21795390	chr1-21795222:21795598	chr1	21795222	21795598	chr1
chr1	21795208	21795647	0.37693675889328	-0.23966322216998	0.668181818181818	0.340460526315789	0.327004442382148	0.605070484055211	11	0.00507539231527393	HyperLow	chr1	21795391	21797124	Intron6	+	NBPF3	protein_coding	chr1	21795391	21795647	0.583143507972665	0.147720715522216	*	*	*	*	*	0	0	*	*	*	*	*	0	0	chr1-21795160:21795415	chr1	21795160	21795415	chr1	21795391	21795415	chr1-21795222:21795598	chr1	21795222	21795598	chr1
chr1	21864205	21865009	0.209848484848485	-0.0539374770088625	0.781746031746032	0.430555555555555	0.459594497828725	0.540450871204341	23	0.0155759331583167	HyperHigh	chr1	21836011	21880470	Intron1	+	ALPL	protein_coding	chr1	21864205	21865009	1	0.0180840774646303	*	*	*	*	*	0	0	*	*	*	*	*	0	0	chr1-21864405:21865175	chr1	21864405	21865175	chr1	21864405	21865009	chr1-21864969:21865086	chr1	21864969	21865086	chr1
chr1	21945659	21947436	0.24859943977591	-0.091910624266792	0.866666666666667	0.585714285714285	0.385593216482346	0.569535509696695	33	0.00365075293153085	HyperHigh	chr1	21945566	21946507	Intron4	-	RAP1GAP	protein_coding	chr1	21945659	21946507	0.477208778840743	0.901168969181722	*	*	*	*	*	0	0	*	*	*	*	*	0	0	chr1-21946425:21946650	chr1	21946425	21946650	chr1	21946425	21946507	chr1-21946506:21946955	chr1	21946506	21946955	chr1
chr1	21945659	21947436	0.24859943977591	-0.091910624266792	0.866666666666667	0.585714285714285	0.385593216482346	0.569535509696695	33	0.00365075293153085	HyperHigh	chr1	21946508	21946543	Exon4	-	RAP1GAP	protein_coding	chr1	21946508	21946543	0.0196961170512099	1	*	*	*	*	*	0	0	*	*	*	*	*	0	0	chr1-21946425:21946650	chr1	21946425	21946650	chr1	21946508	21946543	chr1-21946528:21946993	chr1	21946528	21946993	chr1
chr1	21945659	21947436	0.24859943977591	-0.091910624266792	0.866666666666667	0.585714285714285	0.385593216482346	0.569535509696695	33	0.00365075293153085	HyperHigh	chr1	21946544	21952796	Intron3	-	RAP1GAP	protein_coding	chr1	21946544	21947436	0.501969611705121	0.142674344209853	*	*	*	*	*	0	0	*	*	*	*	*	0	0	chr1-21947065:21947495	chr1	21947065	21947495	chr1	21947065	21947436	chr1-21947235:21947691	chr1	21947235	21947691	chr1
chr1	21994336	21995315	0.244444444444444	0.193901388648503	0.454545454545455	0.117647058823529	0.5	0.240642698295787	16	0.0223512662798975	HyperHigh	chr1	21976290	21995746	Intron1	-	RAP1GAP	protein_coding	chr1	21994336	21995315	1	0.0503186677631579	CpG: 74	chr1	21995063	21995914	chr1	21995063	21995315	*	*	*	*	*	0	0	chr1-21994645:21995435	chr1	21994645	21995435	chr1	21994645	21995315	chr1-21995283:21995683	chr1	21995283	21995683	chr1
chr1	23038335	23040049	-0.25	-0.126833035546969	0.4	0.666666666666667	0.306098611351497	0.507309364962454	38	0.00196699455712832	HypoLow	chr1	23037537	23107913	Intron1	+	EPHB2	protein_coding	chr1	23038335	23040049	1	0.0243548937137661	CpG: 113	chr1	23036823	23038362	chr1	23038335	23038362	chr1:23039517-23039656	chr1	23039517	23039656	chr1	23039517	23039656	chr1-23039805:23040335	chr1	23039805	23040335	chr1	23039805	23040049	chr1-23039548:23039647	chr1	23039548	23039647	chr1
chr1	23102154	23104178	0.203947368421052	0	0.736842105263158	0.416666666666667	0.382807902019816	0.38257697403972	25	0.0487426877101169	HyperHigh	chr1	23037537	23107913	Intron1	+	EPHB2	protein_coding	chr1	23102154	23104178	1	0.0287598044787996	*	*	*	*	*	0	0	*	*	*	*	*	0	0	chr1-23103945:23104095	chr1	23103945	23104095	chr1	23103945	23104095	chr1-23103619:23103979	chr1	23103619	23103979	chr1
chr1	23227255	23228084	0.305882352941177	0.035672569865119	0.736842105263158	0.368421052631579	0.432931646898466	0.449529298670807	10	0.0339768649493366	HyperHigh	chr1	23222972	23232479	Intron9	+	EPHB2	protein_coding	chr1	23227255	23228084	1	0.0871989060692122	*	*	*	*	*	0	0	*	*	*	*	*	0	0	chr1-23227920:23228295	chr1	23227920	23228295	chr1	23227920	23228084	chr1-23227980:23228176	chr1	23227980	23228176	chr1
chr1	23279530	23281311	0.3114127702363	0.108851531366424	0.544444444444445	0.169856459330143	0.637322482714009	0.503654682481227	37	9.88973753787269e-05	HyperHigh	chr1	23279536	23280517	LastExon	-	LACTBL1	protein_coding	chr1	23279536	23280517	0.550814149354295	1	CpG: 129	chr1	23279553	23280569	chr1	23279553	23280517	*	*	*	*	*	0	0	chr1-23280320:23281535	chr1	23280320	23281535	chr1	23280320	23280517	chr1-23279802:23280298	chr1	23279802	23280298	chr1
chr1	23279530	23281311	0.3114127702363	0.108851531366424	0.544444444444445	0.169856459330143	0.637322482714009	0.503654682481227	37	9.88973753787269e-05	HyperHigh	chr1	23280518	23281813	Intron5	-	LACTBL1	protein_coding	chr1	23280518	23281311	0.445255474452555	0.612355212355212	CpG: 129	chr1	23279553	23280569	chr1	23280518	23280569	*	*	*	*	*	0	0	chr1-23280320:23281535	chr1	23280320	23281535	chr1	23280518	23281311	chr1-23280549:23281199	chr1	23280549	23281199	chr1
chr1	23880480	23880719	0.333333333333333	0.15714013290748	0.75	0.176470588235294	0.5	0.45698353148489	8	0.0378787878787879	HyperHigh	*	*	*	InterGenic	*	*	*	*	*	*	*	*	*	*	*	*	*	0	0	*	*	*	*	*	0	0	chr1-23880405:23880610	chr1	23880405	23880610	chr1	23880480	23880610	chr1-23880716:23881080	chr1	23880716	23881080	chr1
chr1	24562534	24563254	0.200386569951787	-0.232019033057436	0.916083916083916	0.68719806763285	0.341084376748897	0.518885569154274	13	0.0106928810066866	HyperLow	*	*	*	InterGenic	*	*	*	*	*	*	*	*	*	*	*	*	*	0	0	*	*	*	*	*	0	0	chr1-24563040:24563570	chr1	24563040	24563570	chr1	24563040	24563254	chr1-24563193:24563619	chr1	24563193	24563619	chr1
chr1	24866103	24868390	0.123227752639517	-0.215674201408972	0.882352941176471	0.792857142857143	0.18920620363032	0.412670602132302	27	0.00855726801253319	HypoLow	chr1	24861583	24867530	LastExon	+	RCAN3	protein_coding	chr1	24866103	24867530	0.623961521644075	0.239952917437363	*	*	*	*	*	0	0	*	*	*	*	*	0	0	chr1-24867285:24867435	chr1	24867285	24867435	chr1	24867285	24867435	chr1-24867528:24867824	chr1	24867528	24867824	chr1
chr1	24866103	24868390	0.123227752639517	-0.215674201408972	0.882352941176471	0.792857142857143	0.18920620363032	0.412670602132302	27	0.00855726801253319	HypoLow	chr1	24865292	24866366	LastExon	-	RP4-594I10.3	lincRNA	chr1	24866103	24866366	0.114997813729777	0.24487895716946	*	*	*	*	*	0	0	*	*	*	*	*	0	0	*	*	*	*	*	0	0	chr1-24866354:24866834	chr1	24866354	24866834	chr1
chr1	24866103	24868390	0.123227752639517	-0.215674201408972	0.882352941176471	0.792857142857143	0.18920620363032	0.412670602132302	27	0.00855726801253319	HypoLow	chr1	24866367	24878378	Intron2	-	RP4-594I10.3	lincRNA	chr1	24866367	24868390	0.884564932225623	0.168428940138207	*	*	*	*	*	0	0	*	*	*	*	*	0	0	chr1-24867560:24868155	chr1	24867560	24868155	chr1	24867560	24868155	chr1-24868379:24868943	chr1	24868379	24868943	chr1
chr1	24877650	24878410	0.320833333333333	0.149678679209536	0.596256684491979	0.154761904761905	0.479797248914362	0.393671109048816	9	0.0379176379176379	HyperHigh	chr1	24866367	24878378	Intron2	-	RP4-594I10.3	lincRNA	chr1	24877650	24878378	0.957894736842105	0.0606111064857214	*	*	*	*	*	0	0	*	*	*	*	*	0	0	chr1-24878285:24878735	chr1	24878285	24878735	chr1	24878285	24878378	chr1-24878375:24878734	chr1	24878375	24878734	chr1
chr1	24877650	24878410	0.320833333333333	0.149678679209536	0.596256684491979	0.154761904761905	0.479797248914362	0.393671109048816	9	0.0379176379176379	HyperHigh	chr1	24878379	24878539	Exon2	-	RP4-594I10.3	lincRNA	chr1	24878379	24878410	0.0407894736842105	0.19375	*	*	*	*	*	0	0	*	*	*	*	*	0	0	chr1-24878285:24878735	chr1	24878285	24878735	chr1	24878379	24878410	chr1-24878378:24878942	chr1	24878378	24878942	chr1
chr1	25046609	25046981	0.342424242424243	0.253003900345165	0.5	0.157575757575757	0.380112021586814	0.181188147733199	11	0.000176611011668935	HyperHigh	*	*	*	InterGenic	*	*	*	*	*	*	*	*	*	*	*	*	*	0	0	*	*	*	*	*	0	0	chr1-25046505:25046975	chr1	25046505	25046975	chr1	25046609	25046975	chr1-25046778:25047234	chr1	25046778	25047234	chr1
chr1	25240643	25241703	-0.365384615384615	-0.184753835379883	0.0714285714285714	0.583333333333333	0.306098611351497	0.45698353148489	20	0.000576454102721705	HypoLow	chr1	25233909	25245730	Intron5	-	RUNX3	protein_coding	chr1	25240643	25241703	1	0.0896709246256662	*	*	*	*	*	0	0	*	*	*	*	*	0	0	chr1-25240760:25241650	chr1	25240760	25241650	chr1	25240760	25241650	chr1-25241580:25242400	chr1	25241580	25242400	chr1
chr1	25352829	25354815	-0.0857142857142861	0.323650198151556	0.857142857142857	1	0.482205555876069	0.240642698295787	24	0.0220443337141563	HypoHigh	*	*	*	InterGenic	*	*	*	*	*	*	*	*	*	*	*	*	*	0	0	chr1:25354376-25354504	chr1	25354376	25354504	chr1	25354376	25354504	chr1-25354620:25355010	chr1	25354620	25355010	chr1	25354620	25354815	chr1-25354732:25355076	chr1	25354732	25355076	chr1
chr1	25383053	25383676	-0.238636363636364	-0.166123610870725	0.142857142857143	0.363636363636364	0.270426041486378	0.5	12	0.0275585632966357	HypoLow	*	*	*	InterGenic	*	*	*	*	*	*	*	*	*	*	*	*	*	0	0	*	*	*	*	*	0	0	chr1-25383265:25383415	chr1	25383265	25383415	chr1	25383265	25383415	chr1-25383617:25384121	chr1	25383617	25384121	chr1
chr1	25525285	25525906	0.117647058823529	-0.246482297483466	0.888888888888889	0.777777777777778	0	0.453654682481227	14	0.0467737071266658	HypoLow	*	*	*	InterGenic	*	*	*	*	*	*	*	*	*	*	*	*	*	0	0	*	*	*	*	*	0	0	chr1-25525105:25525735	chr1	25525105	25525735	chr1	25525285	25525735	chr1-25525322:25525578	chr1	25525322	25525578	chr1
chr1	25833558	25834142	0.36766917293233	-0.175824546471435	0.8375	0.483333333333334	0.344521781389235	0.597493750120193	11	0.00217691164597107	HyperLow	*	*	*	InterGenic	*	*	*	*	*	*	*	*	*	*	*	*	*	0	0	*	*	*	*	*	0	0	*	*	*	*	*	0	0	chr1-25833456:25833861	chr1	25833456	25833861	chr1
chr1	27384523	27386073	0.0285714285714285	-0.209723240874832	0.933333333333333	0.870833333333334	0.073249497820252	0.311383505145467	23	0.0835559680903568	HypoLow	*	*	*	InterGenic	*	*	*	*	*	*	*	*	*	*	*	*	*	0	0	*	*	*	*	*	0	0	chr1-27385600:27386095	chr1	27385600	27386095	chr1	27385600	27386073	chr1-27385944:27386228	chr1	27385944	27386228	chr1
chr1	27427503	27428246	-0.222222222222222	0.197224259527442	0.777777777777778	1	0.270426041486378	0	12	0.0189232417683612	HypoHigh	chr1	27427136	27427693	Intron11	-	SLC9A1	protein_coding	chr1	27427503	27427693	0.255720053835801	0.341113105924596	*	*	*	*	*	0	0	*	*	*	*	*	0	0	chr1-27427565:27427915	chr1	27427565	27427915	chr1	27427565	27427693	chr1-27427593:27428438	chr1	27427593	27428438	chr1
chr1	27427503	27428246	-0.222222222222222	0.197224259527442	0.777777777777778	1	0.270426041486378	0	12	0.0189232417683612	HypoHigh	chr1	27427694	27427766	Exon11	-	SLC9A1	protein_coding	chr1	27427694	27427766	0.0969044414535666	1	*	*	*	*	*	0	0	*	*	*	*	*	0	0	chr1-27427565:27427915	chr1	27427565	27427915	chr1	27427694	27427766	chr1-27427593:27428438	chr1	27427593	27428438	chr1
chr1	27427503	27428246	-0.222222222222222	0.197224259527442	0.777777777777778	1	0.270426041486378	0	12	0.0189232417683612	HypoHigh	chr1	27427767	27428215	Intron10	-	SLC9A1	protein_coding	chr1	27427767	27428215	0.602960969044415	1	*	*	*	*	*	0	0	*	*	*	*	*	0	0	chr1-27427945:27428315	chr1	27427945	27428315	chr1	27427945	27428215	chr1-27428135:27428419	chr1	27428135	27428419	chr1
chr1	27427503	27428246	-0.222222222222222	0.197224259527442	0.777777777777778	1	0.270426041486378	0	12	0.0189232417683612	HypoHigh	chr1	27428216	27428317	Exon10	-	SLC9A1	protein_coding	chr1	27428216	27428246	0.0403768506056528	0.297029702970297	*	*	*	*	*	0	0	*	*	*	*	*	0	0	chr1-27427945:27428315	chr1	27427945	27428315	chr1	27428216	27428246	chr1-27428135:27428419	chr1	27428135	27428419	chr1
chr1	27578884	27582058	0.117647058823529	-0.240642698295787	1	0.8	0.197224259527442	0.328808909576947	30	9.36025742107044e-05	HypoLow	chr1	27561443	27587446	Intron1	+	WDTC1	protein_coding	chr1	27578884	27582058	1	0.122062838903203	*	*	*	*	*	0	0	*	*	*	*	*	0	0	chr1-27581760:27581910	chr1	27581760	27581910	chr1	27581760	27581910	chr1-27581540:27582070	chr1	27581540	27582070	chr1
chr1	27709600	27709985	0.219005847953216	0.140466837502103	0.3875	0.0977443609022557	0.53554878664931	0.40460385535725	17	0.0147465145279139	HyperHigh	chr1	27709158	27709641	Intron1	-	CD164L2	protein_coding	chr1	27709600	27709641	0.106493506493506	0.0848861283643892	CpG: 24	chr1	27709600	27709831	chr1	27709600	27709641	*	*	*	*	*	0	0	chr1-27709525:27709695	chr1	27709525	27709695	chr1	27709600	27709641	chr1-27709625:27710075	chr1	27709625	27710075	chr1
chr1	27709600	27709985	0.219005847953216	0.140466837502103	0.3875	0.0977443609022557	0.53554878664931	0.40460385535725	17	0.0147465145279139	HyperHigh	chr1	27709642	27709870	FirstExon	-	CD164L2	protein_coding	chr1	27709642	27709870	0.592207792207792	1	CpG: 24	chr1	27709600	27709831	chr1	27709642	27709831	*	*	*	*	*	0	0	chr1-27709745:27710015	chr1	27709745	27710015	chr1	27709745	27709870	chr1-27709859:27710103	chr1	27709859	27710103	chr1
chr1	27709600	27709985	0.219005847953216	0.140466837502103	0.3875	0.0977443609022557	0.53554878664931	0.40460385535725	17	0.0147465145279139	HyperHigh	chr1	27709871	27710871	Promoter	-	CD164L2	protein_coding	chr1	27709871	27709985	0.296103896103896	0.114	*	*	*	*	*	0	0	*	*	*	*	*	0	0	chr1-27709745:27710015	chr1	27709745	27710015	chr1	27709871	27709985	chr1-27709983:27710413	chr1	27709983	27710413	chr1
chr1	27852804	27853937	-0.091507177033493	-0.331676498260619	0.0588235294117647	0.142857142857143	0.212618535703561	0.471683085246986	23	0.00311828757591343	HypoLow	chr1	27852397	27856870	Intron1	+	RP1-159A19.4	antisense	chr1	27852804	27853937	1	0.253297563156718	*	*	*	*	*	0	0	chr1:27853337-27854089	chr1	27853337	27854089	chr1	27853337	27853937	chr1-27853045:27854495	chr1	27853045	27854495	chr1	27853045	27853937	chr1-27853929:27854219	chr1	27853929	27854219	chr1
chr1	27939303	27940961	0	0.200112706825559	0.933333333333333	0.957427536231884	0.312121639496576	0.121422271707711	33	0.267794330558842	HypoHigh	chr1	27938575	27939633	LastExon	-	FGR	protein_coding	chr1	27939303	27939633	0.199034981905911	0.311909262759924	*	*	*	*	*	0	0	*	*	*	*	*	0	0	chr1-27939165:27939315	chr1	27939165	27939315	chr1	27939303	27939315	chr1-27939270:27939834	chr1	27939270	27939834	chr1
chr1	27939303	27940961	0	0.200112706825559	0.933333333333333	0.957427536231884	0.312121639496576	0.121422271707711	33	0.267794330558842	HypoHigh	chr1	27939634	27939729	Intron12	-	FGR	protein_coding	chr1	27939634	27939729	0.0572979493365501	1	*	*	*	*	*	0	0	*	*	*	*	*	0	0	*	*	*	*	*	0	0	chr1-27939270:27939834	chr1	27939270	27939834	chr1
chr1	27939303	27940961	0	0.200112706825559	0.933333333333333	0.957427536231884	0.312121639496576	0.121422271707711	33	0.267794330558842	HypoHigh	chr1	27939730	27939861	Exon12	-	FGR	protein_coding	chr1	27939730	27939861	0.0790108564535585	1	*	*	*	*	*	0	0	*	*	*	*	*	0	0	*	*	*	*	*	0	0	chr1-27939270:27939834	chr1	27939270	27939834	chr1
chr1	27939303	27940961	0	0.200112706825559	0.933333333333333	0.957427536231884	0.312121639496576	0.121422271707711	33	0.267794330558842	HypoHigh	chr1	27939862	27940940	Intron11	-	FGR	protein_coding	chr1	27939862	27940940	0.650180940892642	1	*	*	*	*	*	0	0	*	*	*	*	*	0	0	*	*	*	*	*	0	0	chr1-27940904:27941344	chr1	27940904	27941344	chr1
chr1	27939303	27940961	0	0.200112706825559	0.933333333333333	0.957427536231884	0.312121639496576	0.121422271707711	33	0.267794330558842	HypoHigh	chr1	27940941	27941094	Exon11	-	FGR	protein_coding	chr1	27940941	27940961	0.0120627261761158	0.130718954248366	*	*	*	*	*	0	0	*	*	*	*	*	0	0	chr1-27940945:27941095	chr1	27940945	27941095	chr1	27940945	27940961	chr1-27940904:27941344	chr1	27940904	27941344	chr1
chr1	27940975	27941776	0.0787037037037035	-0.205195073076184	0.94949494949495	0.82	0.288262326418938	0.403751977756065	23	0.0168516582831594	HypoLow	chr1	27940941	27941094	Exon11	-	FGR	protein_coding	chr1	27940975	27941094	0.14856429463171	0.777777777777778	*	*	*	*	*	0	0	*	*	*	*	*	0	0	chr1-27940945:27941095	chr1	27940945	27941095	chr1	27940975	27941094	chr1-27941088:27941260	chr1	27941088	27941260	chr1
chr1	27940975	27941776	0.0787037037037035	-0.205195073076184	0.94949494949495	0.82	0.288262326418938	0.403751977756065	23	0.0168516582831594	HypoLow	chr1	27941095	27941360	Intron10	-	FGR	protein_coding	chr1	27941095	27941360	0.33083645443196	1	*	*	*	*	*	0	0	*	*	*	*	*	0	0	chr1-27941245:27941795	chr1	27941245	27941795	chr1	27941245	27941360	chr1-27941340:27941744	chr1	27941340	27941744	chr1
chr1	27940975	27941776	0.0787037037037035	-0.205195073076184	0.94949494949495	0.82	0.288262326418938	0.403751977756065	23	0.0168516582831594	HypoLow	chr1	27941361	27941437	Exon10	-	FGR	protein_coding	chr1	27941361	27941437	0.0948813982521848	1	*	*	*	*	*	0	0	*	*	*	*	*	0	0	chr1-27941245:27941795	chr1	27941245	27941795	chr1	27941361	27941437	chr1-27941340:27941744	chr1	27941340	27941744	chr1
chr1	27940975	27941776	0.0787037037037035	-0.205195073076184	0.94949494949495	0.82	0.288262326418938	0.403751977756065	23	0.0168516582831594	HypoLow	chr1	27941438	27941944	Intron9	-	FGR	protein_coding	chr1	27941438	27941776	0.421972534332085	0.66798418972332	*	*	*	*	*	0	0	*	*	*	*	*	0	0	chr1-27941245:27941795	chr1	27941245	27941795	chr1	27941438	27941776	chr1-27941772:27942156	chr1	27941772	27942156	chr1
chr1	28105882	28106592	0.219581582633053	-0.340763587956238	0.922962962962963	0.730952380952381	0.209095979874538	0.58696273149546	17	2.21973121723762e-05	HyperLow	chr1	28099937	28116072	Intron1	+	STX12	protein_coding	chr1	28105882	28106592	1	0.0440037186241091	*	*	*	*	*	0	0	*	*	*	*	*	0	0	chr1-28106540:28106710	chr1	28106540	28106710	chr1	28106540	28106592	chr1-28106492:28106722	chr1	28106492	28106722	chr1
chr1	28261668	28262126	0.223039215686274	-0.27006456024201	0.785714285714285	0.568627450980392	0.306098611351497	0.57091030444069	11	0.088012058446633	HyperLow	chr1	28261504	28261755	FirstExon	+	SMPDL3B	protein_coding	chr1	28261668	28261755	0.189956331877729	0.346613545816733	*	*	*	*	*	0	0	*	*	*	*	*	0	0	chr1-28261345:28262095	chr1	28261345	28262095	chr1	28261668	28261755	chr1-28261686:28261962	chr1	28261686	28261962	chr1
chr1	28261668	28262126	0.223039215686274	-0.27006456024201	0.785714285714285	0.568627450980392	0.306098611351497	0.57091030444069	11	0.088012058446633	HyperLow	chr1	28261756	28271742	Intron1	+	SMPDL3B	protein_coding	chr1	28261756	28262126	0.807860262008734	0.0370518726216703	*	*	*	*	*	0	0	*	*	*	*	*	0	0	chr1-28262125:28262495	chr1	28262125	28262495	chr1	28262125	28262126	chr1-28262119:28262515	chr1	28262119	28262515	chr1
chr1	28481286	28481789	0.261634199134199	0.00837231469094951	0.664335664335664	0.40909090909091	0.438402110145667	0.479797248914362	11	0.0124450219919407	HyperHigh	chr1	28477571	28520232	Intron1	-	PTAFR	protein_coding	chr1	28481286	28481789	1	0.0117906284428401	*	*	*	*	*	0	0	chr1:28481060-28481439	chr1	28481060	28481439	chr1	28481286	28481439	chr1-28481340:28481655	chr1	28481340	28481655	chr1	28481340	28481655	chr1-28481716:28482172	chr1	28481716	28482172	chr1
chr1	29062532	29062840	0.575	-0.203025919458766	0.944444444444444	0.318840579710145	0.370321349147893	0.590142013828792	7	0.0438263654660942	HyperLow	chr1	29062270	29063270	Promoter	+	YTHDF2	protein_coding	chr1	29062532	29062840	1	0.308	*	*	*	*	*	0	0	*	*	*	*	*	0	0	chr1-29062760:29063575	chr1	29062760	29063575	chr1	29062760	29062840	chr1-29062837:29063698	chr1	29062837	29063698	chr1
chr1	29075277	29076240	-0.292592592592593	-0.22247327646342	0.19047619047619	0.51	0.355876930501959	0.621451174083872	15	0.00818931119109092	HypoLow	chr1	29070499	29095440	Intron4	+	YTHDF2	protein_coding	chr1	29075277	29076240	1	0.0386111222485065	*	*	*	*	*	0	0	*	*	*	*	*	0	0	chr1-29076080:29076455	chr1	29076080	29076455	chr1	29076080	29076240	chr1-29075960:29076681	chr1	29075960	29076681	chr1
chr1	29804657	29805368	0.282638888888889	0.280696608362917	0.595029239766082	0.112121212121212	0.713954056853493	0.417209722462608	27	8.20484293498209e-06	HyperHigh	*	*	*	InterGenic	*	*	*	*	*	*	*	*	CpG: 22	chr1	29804962	29805239	chr1	29804962	29805239	*	*	*	*	*	0	0	chr1-29805065:29805330	chr1	29805065	29805330	chr1	29805065	29805330	chr1-29805117:29805317	chr1	29805117	29805317	chr1
chr1	29814064	29816135	-0.054093567251462	0.273988087094977	0.894444444444444	1	0.444402073115499	0.0905940738665995	27	0.0509213553992117	HypoHigh	*	*	*	InterGenic	*	*	*	*	*	*	*	*	*	*	*	*	*	0	0	*	*	*	*	*	0	0	chr1-29815345:29815695	chr1	29815345	29815695	chr1	29815345	29815695	chr1-29815487:29815727	chr1	29815487	29815727	chr1
chr1	30418341	30419834	0.261064425770308	0.147168157784785	0.571895424836601	0.285714285714286	0.530912549537889	0.396862349142171	15	0.00109823117648465	HyperHigh	*	*	*	InterGenic	*	*	*	*	*	*	*	*	*	*	*	*	*	0	0	*	*	*	*	*	0	0	chr1-30419385:30419895	chr1	30419385	30419895	chr1	30419385	30419834	chr1-30418995:30419235	chr1	30418995	30419235	chr1
chr1	30463784	30464176	0.348888888888889	0.26418135414071	0.5	0.0588235294117647	0.662591123829328	0.396240625180289	10	0.0131801517376953	HyperHigh	*	*	*	InterGenic	*	*	*	*	*	*	*	*	*	*	*	*	*	0	0	*	*	*	*	*	0	0	chr1-30463945:30464235	chr1	30463945	30464235	chr1	30463945	30464176	chr1-30463896:30464270	chr1	30463896	30464270	chr1
chr1	30815095	30815753	0.223214285714286	0.158019317527423	0.466666666666667	0.208333333333333	0.626654982909037	0.537399074234331	24	0.00289771121445306	HyperHigh	*	*	*	InterGenic	*	*	*	*	*	*	*	*	*	*	*	*	*	0	0	*	*	*	*	*	0	0	chr1-30815705:30815855	chr1	30815705	30815855	chr1	30815705	30815753	chr1-30815390:30815680	chr1	30815390	30815680	chr1
chr1	30834374	30837591	0.066666666666667	-0.270426041486378	0.888888888888889	0.764705882352941	0.270426041486378	0.4971048856788	30	0.0788257117164536	HypoLow	*	*	*	InterGenic	*	*	*	*	*	*	*	*	*	*	*	*	*	0	0	*	*	*	*	*	0	0	chr1-30837325:30837475	chr1	30837325	30837475	chr1	30837325	30837475	chr1-30834158:30834442	chr1	30834158	30834442	chr1
chr1	31157913	31158199	0.275789473684211	0.306098611351497	0.333333333333333	0.04	0.528320833573719	0.17418645817898	14	0.00325835219418858	HyperHigh	*	*	*	InterGenic	*	*	*	*	*	*	*	*	CpG: 27	chr1	31158009	31158261	chr1	31158009	31158199	*	*	*	*	*	0	0	chr1-31158025:31158675	chr1	31158025	31158675	chr1	31158025	31158199	chr1-31158187:31158967	chr1	31158187	31158967	chr1
chr1	31190645	31190862	0.412121212121212	0.0991778831604591	0.647058823529412	0.222222222222222	0.507309364962454	0.51892654981568	8	0.00873443758538893	HyperHigh	chr1	31189763	31191581	Intron3	-	MATN1	protein_coding	chr1	31190645	31190862	1	0.119361936193619	*	*	*	*	*	0	0	*	*	*	*	*	0	0	chr1-31190805:31192750	chr1	31190805	31192750	chr1	31190805	31190862	chr1-31190854:31191234	chr1	31190854	31191234	chr1
chr1	31190645	31190862	0.412121212121212	0.0991778831604591	0.647058823529412	0.222222222222222	0.507309364962454	0.51892654981568	8	0.00873443758538893	HyperHigh	chr1	31190350	31191350	Promoter	+	MATN1-AS1	antisense	chr1	31190645	31190862	1	0.217	*	*	*	*	*	0	0	*	*	*	*	*	0	0	chr1-31190805:31192750	chr1	31190805	31192750	chr1	31190805	31190862	chr1-31190854:31191234	chr1	31190854	31191234	chr1
chr1	31212804	31217698	-0.0041666666666665	-0.241573865396602	0.452380952380952	0.535714285714285	0.198931144141325	0.406725173821449	49	0.929765055849528	HypoLow	chr1	31212785	31214486	Intron3	-	LAPTM5	protein_coding	chr1	31212804	31214486	0.343686146301594	0.988830099941211	*	*	*	*	*	0	0	*	*	*	*	*	0	0	chr1-31214100:31214335	chr1	31214100	31214335	chr1	31214100	31214335	chr1-31214308:31214552	chr1	31214308	31214552	chr1
chr1	31212804	31217698	-0.0041666666666665	-0.241573865396602	0.452380952380952	0.535714285714285	0.198931144141325	0.406725173821449	49	0.929765055849528	HypoLow	chr1	31214487	31214563	Exon3	-	LAPTM5	protein_coding	chr1	31214487	31214563	0.0155292194523907	1	*	*	*	*	*	0	0	*	*	*	*	*	0	0	chr1-31214520:31214835	chr1	31214520	31214835	chr1	31214520	31214563	chr1-31214308:31214552	chr1	31214308	31214552	chr1
chr1	31212804	31217698	-0.0041666666666665	-0.241573865396602	0.452380952380952	0.535714285714285	0.198931144141325	0.406725173821449	49	0.929765055849528	HypoLow	chr1	31214564	31215302	Intron2	-	LAPTM5	protein_coding	chr1	31214564	31215302	0.15079689415611	1	*	*	*	*	*	0	0	*	*	*	*	*	0	0	chr1-31214980:31215170	chr1	31214980	31215170	chr1	31214980	31215170	chr1-31214917:31215193	chr1	31214917	31215193	chr1
chr1	31212804	31217698	-0.0041666666666665	-0.241573865396602	0.452380952380952	0.535714285714285	0.198931144141325	0.406725173821449	49	0.929765055849528	HypoLow	chr1	31215303	31215396	Exon2	-	LAPTM5	protein_coding	chr1	31215303	31215396	0.0190028606456886	1	*	*	*	*	*	0	0	*	*	*	*	*	0	0	*	*	*	*	*	0	0	chr1-31215365:31216051	chr1	31215365	31216051	chr1
chr1	31212804	31217698	-0.0041666666666665	-0.241573865396602	0.452380952380952	0.535714285714285	0.198931144141325	0.406725173821449	49	0.929765055849528	HypoLow	chr1	31215397	31230505	Intron1	-	LAPTM5	protein_coding	chr1	31215397	31217698	0.470167552104618	0.152303415409055	*	*	*	*	*	0	0	chr1:31216468-31217229	chr1	31216468	31217229	chr1	31216468	31217229	chr1-31217045:31217595	chr1	31217045	31217595	chr1	31217045	31217595	chr1-31217488:31217908	chr1	31217488	31217908	chr1
chr1	32054341	32055038	0.328571428571429	0.114094176956618	0.636363636363636	0.166666666666667	0.61412366439237	0.523650198151556	16	0.00893391109916325	HyperHigh	*	*	*	InterGenic	*	*	*	*	*	*	*	*	CpG: 54	chr1	32054341	32054843	chr1	32054341	32054843	*	*	*	*	*	0	0	chr1-32053965:32054875	chr1	32053965	32054875	chr1	32054341	32054875	chr1-32054411:32054735	chr1	32054411	32054735	chr1
chr1	32237456	32238331	0.270833333333333	0.331343403825652	0.333333333333333	0	0.382944951426972	0.0954656523719854	24	5.75951850901546e-07	HyperHigh	*	*	*	InterGenic	*	*	*	*	*	*	*	*	CpG: 75	chr1	32237827	32238661	chr1	32237827	32238331	chr1:32237691-32238692	chr1	32237691	32238692	chr1	32237691	32238331	chr1-32237485:32238575	chr1	32237485	32238575	chr1	32237485	32238331	chr1-32237986:32238197	chr1	32237986	32238197	chr1
chr1	32827124	32827468	0.162931034482759	0.221083949105918	0.507389162561577	0.138095238095238	0.663880557347091	0.3180591372697	15	0.0766942900188061	HypoHigh	chr1	32826797	32827797	Promoter	+	TSSK3	protein_coding	chr1	32827124	32827468	1	0.344	CpG: 109	chr1	32826944	32828017	chr1	32827124	32827468	*	*	*	*	*	0	0	chr1-32826525:32828615	chr1	32826525	32828615	chr1	32827124	32827468	chr1-32827465:32827961	chr1	32827465	32827961	chr1
chr1	32827124	32827468	0.162931034482759	0.221083949105918	0.507389162561577	0.138095238095238	0.663880557347091	0.3180591372697	15	0.0766942900188061	HypoHigh	chr1	32827330	32827477	LastExon	-	FAM229A	protein_coding	chr1	32827330	32827468	0.401162790697674	0.938775510204082	CpG: 109	chr1	32826944	32828017	chr1	32827330	32827468	*	*	*	*	*	0	0	chr1-32826525:32828615	chr1	32826525	32828615	chr1	32827330	32827468	chr1-32827465:32827961	chr1	32827465	32827961	chr1
chr1	32929683	32931363	0.258417182662539	0.279628814067929	0.333333333333333	0.0571895424836601	0.555746626092837	0.26510466029187	51	3.09132688073354e-09	HyperHigh	chr1	32929657	32930657	Promoter	+	RP1-27O5.3	protein_coding	chr1	32929683	32930657	0.579761904761905	0.974	CpG: 54	chr1	32930500	32931061	chr1	32930500	32930657	*	*	*	*	*	0	0	chr1-32929740:32930775	chr1	32929740	32930775	chr1	32929740	32930657	chr1-32930655:32931299	chr1	32930655	32931299	chr1
chr1	32929683	32931363	0.258417182662539	0.279628814067929	0.333333333333333	0.0571895424836601	0.555746626092837	0.26510466029187	51	3.09132688073354e-09	HyperHigh	chr1	32930658	32930706	FirstExon	+	RP1-27O5.3	protein_coding	chr1	32930658	32930706	0.0285714285714286	1	CpG: 54	chr1	32930500	32931061	chr1	32930658	32930706	*	*	*	*	*	0	0	chr1-32929740:32930775	chr1	32929740	32930775	chr1	32930658	32930706	chr1-32930655:32931299	chr1	32930655	32931299	chr1
chr1	32929683	32931363	0.258417182662539	0.279628814067929	0.333333333333333	0.0571895424836601	0.555746626092837	0.26510466029187	51	3.09132688073354e-09	HyperHigh	chr1	32930707	32936184	Intron1	+	RP1-27O5.3	protein_coding	chr1	32930707	32931363	0.39047619047619	0.119773598685412	CpG: 54	chr1	32930500	32931061	chr1	32930707	32931061	*	*	*	*	*	0	0	chr1-32931185:32931495	chr1	32931185	32931495	chr1	32931185	32931363	chr1-32931326:32931495	chr1	32931326	32931495	chr1
chr1	32929683	32931363	0.258417182662539	0.279628814067929	0.333333333333333	0.0571895424836601	0.555746626092837	0.26510466029187	51	3.09132688073354e-09	HyperHigh	chr1	32929669	32930669	Promoter	+	ZBTB8B	protein_coding	chr1	32929683	32930669	0.586904761904762	0.986	CpG: 54	chr1	32930500	32931061	chr1	32930500	32930669	*	*	*	*	*	0	0	chr1-32929740:32930775	chr1	32929740	32930775	chr1	32929740	32930669	chr1-32930655:32931299	chr1	32930655	32931299	chr1
chr1	32929683	32931363	0.258417182662539	0.279628814067929	0.333333333333333	0.0571895424836601	0.555746626092837	0.26510466029187	51	3.09132688073354e-09	HyperHigh	chr1	32930670	32930706	FirstExon	+	ZBTB8B	protein_coding	chr1	32930670	32930706	0.0214285714285714	1	CpG: 54	chr1	32930500	32931061	chr1	32930670	32930706	*	*	*	*	*	0	0	chr1-32929740:32930775	chr1	32929740	32930775	chr1	32930670	32930706	chr1-32930655:32931299	chr1	32930655	32931299	chr1
chr1	32929683	32931363	0.258417182662539	0.279628814067929	0.333333333333333	0.0571895424836601	0.555746626092837	0.26510466029187	51	3.09132688073354e-09	HyperHigh	chr1	32930707	32936184	Intron1	+	ZBTB8B	protein_coding	chr1	32930707	32931363	0.39047619047619	0.119773598685412	CpG: 54	chr1	32930500	32931061	chr1	32930707	32931061	*	*	*	*	*	0	0	chr1-32931185:32931495	chr1	32931185	32931495	chr1	32931185	32931363	chr1-32931326:32931495	chr1	32931326	32931495	chr1
chr1	33219928	33220536	0.513725490196079	-0.242295846945941	0.777777777777778	0.25	0.432931646898466	0.596643025103333	20	2.55164931307165e-06	HyperLow	chr1	33207791	33233387	Intron1	+	KIAA1522	protein_coding	chr1	33219928	33220536	1	0.0237537115174246	CpG: 61	chr1	33219427	33220028	chr1	33219928	33220028	chr1:33220297-33220575	chr1	33220297	33220575	chr1	33220297	33220536	chr1-33219705:33221295	chr1	33219705	33221295	chr1	33219928	33220536	chr1-33220534:33221178	chr1	33220534	33221178	chr1
chr1	34628081	34630998	0.105263157894737	0.314320933047802	0.142857142857143	0	0.45698353148489	0.15633186452976	88	8.43727202157766e-11	HypoHigh	*	*	*	InterGenic	*	*	*	*	*	*	*	*	CpG: 169	chr1	34628783	34630976	chr1	34628783	34630976	chr1:34628613-34629024	chr1	34628613	34629024	chr1	34628613	34629024	chr1-34630465:34630955	chr1	34630465	34630955	chr1	34630465	34630955	chr1-34630787:34630882	chr1	34630787	34630882	chr1
chr1	34642208	34643013	0.233333333333333	0.160317713081673	0.695652173913043	0.181818181818182	0.662591123829328	0.518885569154274	28	0.000279474123069972	HyperHigh	chr1	34632773	34662825	Intron1	+	C1orf94	protein_coding	chr1	34642208	34643013	1	0.0267869027019832	CpG: 62	chr1	34642382	34643024	chr1	34642382	34643013	*	*	*	*	*	0	0	chr1-34642545:34643195	chr1	34642545	34643195	chr1	34642545	34643013	chr1-34642939:34643249	chr1	34642939	34643249	chr1
chr1	35258652	35259745	0.25506072874494	0.01343536947465	0.8	0.357142857142857	0.482938545241728	0.459472950906775	14	0.0332296664474106	HyperHigh	chr1	35258599	35258669	FirstExon	+	GJA4	protein_coding	chr1	35258652	35258669	0.0155535224153705	0.242857142857143	CpG: 29	chr1	35258564	35258791	chr1	35258652	35258669	*	*	*	*	*	0	0	chr1-35258400:35258935	chr1	35258400	35258935	chr1	35258652	35258669	chr1-35258539:35258798	chr1	35258539	35258798	chr1
chr1	35258652	35259745	0.25506072874494	0.01343536947465	0.8	0.357142857142857	0.482938545241728	0.459472950906775	14	0.0332296664474106	HyperHigh	chr1	35258670	35259797	Intron1	+	GJA4	protein_coding	chr1	35258670	35259745	0.983531564501372	0.953859804791482	CpG: 29	chr1	35258564	35258791	chr1	35258670	35258791	*	*	*	*	*	0	0	chr1-35259485:35260215	chr1	35259485	35260215	chr1	35259485	35259745	chr1-35259551:35259907	chr1	35259551	35259907	chr1
chr1	35350600	35351093	0.238095238095238	0.276614967692679	0.390151515151515	0.138888888888889	0.667923710427274	0.328491765742444	15	0.0477851364034285	HyperHigh	chr1	35350579	35350664	Exon8	-	DLGAP3	protein_coding	chr1	35350600	35350664	0.129817444219067	0.752941176470588	*	*	*	*	*	0	0	*	*	*	*	*	0	0	chr1-35350525:35350795	chr1	35350525	35350795	chr1	35350600	35350664	chr1-35350564:35351636	chr1	35350564	35351636	chr1
chr1	35350600	35351093	0.238095238095238	0.276614967692679	0.390151515151515	0.138888888888889	0.667923710427274	0.328491765742444	15	0.0477851364034285	HyperHigh	chr1	35350665	35351078	Intron7	-	DLGAP3	protein_coding	chr1	35350665	35351078	0.837728194726166	1	CpG: 89	chr1	35350878	35351854	chr1	35350878	35351078	*	*	*	*	*	0	0	chr1-35351065:35351455	chr1	35351065	35351455	chr1	35351065	35351078	chr1-35351077:35351330	chr1	35351077	35351330	chr1
chr1	35350600	35351093	0.238095238095238	0.276614967692679	0.390151515151515	0.138888888888889	0.667923710427274	0.328491765742444	15	0.0477851364034285	HyperHigh	chr1	35351079	35351392	Exon7	-	DLGAP3	protein_coding	chr1	35351079	35351093	0.0283975659229209	0.0447284345047923	CpG: 89	chr1	35350878	35351854	chr1	35351079	35351093	*	*	*	*	*	0	0	chr1-35351065:35351455	chr1	35351065	35351455	chr1	35351079	35351093	chr1-35351077:35351330	chr1	35351077	35351330	chr1
chr1	35604391	35605404	0.240987083092346	-0.162788847730054	0.902380952380953	0.618983957219251	0.435519263072112	0.566040104196715	11	0.0310821680596793	HyperLow	*	*	*	InterGenic	*	*	*	*	*	*	*	*	*	*	*	*	*	0	0	*	*	*	*	*	0	0	chr1-35605020:35605350	chr1	35605020	35605350	chr1	35605020	35605350	chr1-35605031:35605365	chr1	35605031	35605365	chr1
chr1	36038804	36039314	0.3125	-0.326606680711968	0.818181818181818	0.5	0.270426041486378	0.631820614746107	18	1.57216646734918e-05	HyperLow	chr1	36035521	36039960	Intron2	-	RP4-728D4.2	antisense	chr1	36038804	36039314	1	0.114890741157918	CpG: 118	chr1	36038927	36040051	chr1	36038927	36039314	*	*	*	*	*	0	0	chr1-36038485:36039775	chr1	36038485	36039775	chr1	36038804	36039314	chr1-36038940:36039619	chr1	36038940	36039619	chr1
chr1	36038804	36039314	0.3125	-0.326606680711968	0.818181818181818	0.5	0.270426041486378	0.631820614746107	18	1.57216646734918e-05	HyperLow	chr1	36037970	36038970	Promoter	+	TFAP2E	protein_coding	chr1	36038804	36038970	0.325490196078431	0.166	CpG: 118	chr1	36038927	36040051	chr1	36038927	36038970	*	*	*	*	*	0	0	chr1-36038485:36039775	chr1	36038485	36039775	chr1	36038804	36038970	chr1-36038940:36039619	chr1	36038940	36039619	chr1
chr1	36038804	36039314	0.3125	-0.326606680711968	0.818181818181818	0.5	0.270426041486378	0.631820614746107	18	1.57216646734918e-05	HyperLow	chr1	36038971	36039205	FirstExon	+	TFAP2E	protein_coding	chr1	36038971	36039205	0.458823529411765	1	CpG: 118	chr1	36038927	36040051	chr1	36038971	36039205	*	*	*	*	*	0	0	chr1-36038485:36039775	chr1	36038485	36039775	chr1	36038971	36039205	chr1-36038940:36039619	chr1	36038940	36039619	chr1
chr1	36038804	36039314	0.3125	-0.326606680711968	0.818181818181818	0.5	0.270426041486378	0.631820614746107	18	1.57216646734918e-05	HyperLow	chr1	36039206	36039527	Intron1	+	TFAP2E	protein_coding	chr1	36039206	36039314	0.211764705882353	0.336448598130841	CpG: 118	chr1	36038927	36040051	chr1	36039206	36039314	*	*	*	*	*	0	0	chr1-36038485:36039775	chr1	36038485	36039775	chr1	36039206	36039314	chr1-36038940:36039619	chr1	36038940	36039619	chr1
chr1	36580607	36581893	0.247058823529412	-0.012569871683925	0.772727272727273	0.5	0.473245572601161	0.453654682481227	22	0.000336536967695993	HyperHigh	chr1	36565860	36581308	Intron2	-	COL8A2	protein_coding	chr1	36580607	36581308	0.545101088646967	0.045378042465044	*	*	*	*	*	0	0	*	*	*	*	*	0	0	chr1-36580765:36581335	chr1	36580765	36581335	chr1	36580765	36581308	chr1-36581047:36581411	chr1	36581047	36581411	chr1
chr1	36580607	36581893	0.247058823529412	-0.012569871683925	0.772727272727273	0.5	0.473245572601161	0.453654682481227	22	0.000336536967695993	HyperHigh	chr1	36581309	36581353	Exon2	-	COL8A2	protein_coding	chr1	36581309	36581353	0.0342146189735614	1	*	*	*	*	*	0	0	*	*	*	*	*	0	0	chr1-36580765:36581335	chr1	36580765	36581335	chr1	36581309	36581335	chr1-36581047:36581411	chr1	36581047	36581411	chr1
chr1	36580607	36581893	0.247058823529412	-0.012569871683925	0.772727272727273	0.5	0.473245572601161	0.453654682481227	22	0.000336536967695993	HyperHigh	chr1	36581354	36590657	Intron1	-	COL8A2	protein_coding	chr1	36581354	36581893	0.419129082426128	0.0579382994732882	*	*	*	*	*	0	0	*	*	*	*	*	0	0	chr1-36581540:36582115	chr1	36581540	36582115	chr1	36581540	36581893	chr1-36581547:36581817	chr1	36581547	36581817	chr1
chr1	37235952	37237930	0.578571428571429	-0.187941704319286	0.894444444444444	0.242647058823529	0.308713891031344	0.503654682481227	27	2.29872220597136e-07	HyperLow	chr1	37237740	37238740	Promoter	+	RP4-614N24.1	antisense	chr1	37237740	37237930	0.096056622851365	0.19	*	*	*	*	*	0	0	*	*	*	*	*	0	0	*	*	*	*	*	0	0	*	*	*	*	*
chr1	37783643	37784208	0.261538461538462	0.323427993244657	0.461538461538462	0.157894736842105	0.650070688304916	0.323650198151556	22	0.00125036915689545	HyperHigh	chr1	37741861	37790590	Intron1	-	RP5-1180C18.1	lincRNA	chr1	37783643	37784208	1	0.0115947382462189	CpG: 47	chr1	37783611	37784258	chr1	37783643	37784208	chr1:37784198-37784531	chr1	37784198	37784531	chr1	37784198	37784208	chr1-37783665:37784070	chr1	37783665	37784070	chr1	37783665	37784070	chr1-37783781:37784031	chr1	37783781	37784031	chr1
chr1	38119331	38122959	0.0213815789473685	-0.266104515597552	1	0.905701754385965	0.18920620363032	0.428968085484082	41	0.0107727351704782	HypoLow	*	*	*	InterGenic	*	*	*	*	*	*	*	*	*	*	*	*	*	0	0	*	*	*	*	*	0	0	chr1-38122505:38122790	chr1	38122505	38122790	chr1	38122505	38122790	chr1-38122226:38122416	chr1	38122226	38122416	chr1
chr1	38229734	38232119	0.178137651821863	0.226613086897212	0.230769230769231	0.05	0.452259883149013	0.288618872485741	64	4.81920714918995e-06	HypoHigh	chr1	38228522	38230632	Intron1	-	EPHA10	protein_coding	chr1	38229734	38230632	0.376519916142558	0.425592417061611	CpG: 77	chr1	38229838	38230888	chr1	38229838	38230632	*	*	*	*	*	0	0	chr1-38230020:38230555	chr1	38230020	38230555	chr1	38230020	38230555	chr1-38230604:38230984	chr1	38230604	38230984	chr1
chr1	38229734	38232119	0.178137651821863	0.226613086897212	0.230769230769231	0.05	0.452259883149013	0.288618872485741	64	4.81920714918995e-06	HypoHigh	chr1	38230633	38230738	FirstExon	-	EPHA10	protein_coding	chr1	38230633	38230738	0.0440251572327044	1	CpG: 77	chr1	38229838	38230888	chr1	38230633	38230738	*	*	*	*	*	0	0	chr1-38230640:38230955	chr1	38230640	38230955	chr1	38230640	38230738	chr1-38230735:38231075	chr1	38230735	38231075	chr1
chr1	38229734	38232119	0.178137651821863	0.226613086897212	0.230769230769231	0.05	0.452259883149013	0.288618872485741	64	4.81920714918995e-06	HypoHigh	chr1	38230739	38231739	Promoter	-	EPHA10	protein_coding	chr1	38230739	38231739	0.419287211740042	1	CpG: 77	chr1	38229838	38230888	chr1	38230739	38230888	*	*	*	*	*	0	0	chr1-38231505:38232035	chr1	38231505	38232035	chr1	38231505	38231739	chr1-38231723:38232219	chr1	38231723	38232219	chr1
chr1	38247826	38248934	-0.087121212121212	0.240642698295787	0.909090909090909	1	0.384269083954659	0.098612129763721	19	0.0776115019141287	HypoHigh	*	*	*	InterGenic	*	*	*	*	*	*	*	*	*	*	*	*	*	0	0	*	*	*	*	*	0	0	*	*	*	*	*	0	0	*	*	*	*	*
chr1	38495159	38495477	0.267132867132868	0.121505959170086	0.582887700534759	0.262443438914027	0.697689735923964	0.567923710427275	11	0.0154866736975349	HyperHigh	*	*	*	InterGenic	*	*	*	*	*	*	*	*	*	*	*	*	*	0	0	*	*	*	*	*	0	0	chr1-38495465:38495675	chr1	38495465	38495675	chr1	38495465	38495477	chr1-38495340:38496171	chr1	38495340	38496171	chr1
chr1	38509444	38512013	0.0642857142857142	0.20277650689152	0.142857142857143	0.0526315789473684	0.430056960278942	0.167752778258549	69	0.000358079669500776	HypoHigh	chr1	38509523	38512450	FirstExon	-	POU3F1	protein_coding	chr1	38509523	38512013	0.96924873491631	0.850700375811411	CpG: 312	chr1	38510102	38513642	chr1	38510102	38512013	*	*	*	*	*	0	0	chr1-38511805:38512015	chr1	38511805	38512015	chr1	38511805	38512013	chr1-38512006:38512341	chr1	38512006	38512341	chr1
chr1	38509444	38512013	0.0642857142857142	0.20277650689152	0.142857142857143	0.0526315789473684	0.430056960278942	0.167752778258549	69	0.000358079669500776	HypoHigh	chr1	38511985	38512985	Promoter	+	RP5-884C9.2	lincRNA	chr1	38511985	38512013	0.0108991825613079	0.028	CpG: 312	chr1	38510102	38513642	chr1	38511985	38512013	*	*	*	*	*	0	0	chr1-38511805:38512015	chr1	38511805	38512015	chr1	38511985	38512013	chr1-38512006:38512341	chr1	38512006	38512341	chr1
chr1	38579824	38580681	-0.28	-0.166123610870725	0.111111111111111	0.428571428571429	0.417209722462608	0.482938545241728	14	0.00647691081473768	HypoLow	*	*	*	InterGenic	*	*	*	*	*	*	*	*	*	*	*	*	*	0	0	*	*	*	*	*	0	0	chr1-38580040:38580275	chr1	38580040	38580275	chr1	38580040	38580275	chr1-38580173:38580300	chr1	38580173	38580300	chr1
chr1	38617046	38625018	0.0954545454545455	-0.207922627645344	0.916666666666667	0.853571428571428	0.240642698295787	0.455071268106594	45	0.00601465213248973	HypoLow	*	*	*	InterGenic	*	*	*	*	*	*	*	*	*	*	*	*	*	0	0	*	*	*	*	*	0	0	chr1-38624885:38625035	chr1	38624885	38625035	chr1	38624885	38625018	chr1-38621202:38621348	chr1	38621202	38621348	chr1
chr1	38893600	38893748	0.407051282051281	-0.0474881939153225	0.769230769230769	0.403985507246377	0.468465338696773	0.563976783933408	7	0.00865800865800866	HyperHigh	*	*	*	InterGenic	*	*	*	*	*	*	*	*	*	*	*	*	*	0	0	*	*	*	*	*	0	0	*	*	*	*	*	0	0	*	*	*	*	*
chr1	38955145	38955969	0.208333333333333	-0.245739940713295	0.928571428571429	0.666666666666667	0.240642698295787	0.486382639009082	16	0.0138796623723747	HyperLow	*	*	*	InterGenic	*	*	*	*	*	*	*	*	*	*	*	*	*	0	0	*	*	*	*	*	0	0	chr1-38955500:38955835	chr1	38955500	38955835	chr1	38955500	38955835	chr1-38955820:38956031	chr1	38955820	38956031	chr1
chr1	39185756	39191098	0.0452380952380955	-0.250331570060456	1	0.914855072463769	0	0.330851045219197	47	0.00412690346992663	HypoLow	*	*	*	InterGenic	*	*	*	*	*	*	*	*	*	*	*	*	*	0	0	*	*	*	*	*	0	0	chr1-39191080:39191315	chr1	39191080	39191315	chr1	39191080	39191098	chr1-39190595:39190975	chr1	39190595	39190975	chr1
chr1	39283491	39283824	0.418035395976573	-0.246258248966775	0.834841628959276	0.411764705882353	0.300319537391545	0.54021614768096	13	0.000380832469445939	HyperLow	*	*	*	InterGenic	*	*	*	*	*	*	*	*	CpG: 96	chr1	39283609	39284576	chr1	39283609	39283824	*	*	*	*	*	0	0	chr1-39283660:39283835	chr1	39283660	39283835	chr1	39283660	39283824	chr1-39283823:39284167	chr1	39283823	39284167	chr1
chr1	39546494	39546759	0.269444444444444	-0.056842273031645	0.688888888888889	0.323529411764706	0.466465823449233	0.415179343306371	11	0.0488540070212225	HyperHigh	*	*	*	InterGenic	*	*	*	*	*	*	*	*	*	*	*	*	*	0	0	*	*	*	*	*	0	0	chr1-39546625:39546915	chr1	39546625	39546915	chr1	39546625	39546759	chr1-39546617:39546861	chr1	39546617	39546861	chr1
chr1	40149380	40150002	0.319268476621418	0.029013958583311	0.675438596491228	0.323529411764706	0.629748809503053	0.592162713354463	19	0.00034816812705805	HyperHigh	chr1	40148406	40149608	Intron3	-	HPCAL4	protein_coding	chr1	40149380	40149608	0.366559485530547	0.189683860232945	CpG: 62	chr1	40149431	40150013	chr1	40149431	40149608	*	*	*	*	*	0	0	chr1-40149260:40150075	chr1	40149260	40150075	chr1	40149380	40149608	chr1-40149583:40149913	chr1	40149583	40149913	chr1
chr1	40149380	40150002	0.319268476621418	0.029013958583311	0.675438596491228	0.323529411764706	0.629748809503053	0.592162713354463	19	0.00034816812705805	HyperHigh	chr1	40149609	40149824	Exon3	-	HPCAL4	protein_coding	chr1	40149609	40149824	0.345659163987138	1	CpG: 62	chr1	40149431	40150013	chr1	40149609	40149824	*	*	*	*	*	0	0	chr1-40149260:40150075	chr1	40149260	40150075	chr1	40149609	40149824	chr1-40149583:40149913	chr1	40149583	40149913	chr1
chr1	40149380	40150002	0.319268476621418	0.029013958583311	0.675438596491228	0.323529411764706	0.629748809503053	0.592162713354463	19	0.00034816812705805	HyperHigh	chr1	40149825	40150113	Intron2	-	HPCAL4	protein_coding	chr1	40149825	40150002	0.284565916398714	0.614583333333333	CpG: 62	chr1	40149431	40150013	chr1	40149825	40150002	*	*	*	*	*	0	0	chr1-40149260:40150075	chr1	40149260	40150075	chr1	40149825	40150002	chr1-40149583:40149913	chr1	40149583	40149913	chr1
chr1	40157220	40158281	0.131118881118881	0.277618597980388	0.178571428571428	0	0.453765784934677	0.216674140549451	33	4.4142327669206e-06	HypoHigh	chr1	40156978	40157361	FirstExon	-	HPCAL4	protein_coding	chr1	40157220	40157361	0.132893496701225	0.368146214099217	CpG: 116	chr1	40156930	40158514	chr1	40157220	40157361	*	*	*	*	*	0	0	chr1-40156860:40157535	chr1	40156860	40157535	chr1	40157220	40157361	chr1-40157338:40157777	chr1	40157338	40157777	chr1
chr1	40157220	40158281	0.131118881118881	0.277618597980388	0.178571428571428	0	0.453765784934677	0.216674140549451	33	4.4142327669206e-06	HypoHigh	chr1	40157362	40158362	Promoter	-	HPCAL4	protein_coding	chr1	40157362	40158281	0.866163996229972	0.919	CpG: 116	chr1	40156930	40158514	chr1	40157362	40158281	*	*	*	*	*	0	0	chr1-40157880:40158375	chr1	40157880	40158375	chr1	40157880	40158281	chr1-40158086:40158232	chr1	40158086	40158232	chr1
chr1	40253707	40254417	0.195294117647059	0.417876094505174	0.5	0.0714285714285714	0.636204232957571	0.240642698295787	20	0.00096568768516528	HypoHigh	chr1	40240711	40253823	Intron1	-	BMP8B	protein_coding	chr1	40253707	40253823	0.163380281690141	0.00884685784014643	CpG: 157	chr1	40253683	40255172	chr1	40253707	40253823	*	*	*	*	*	0	0	chr1-40253765:40254095	chr1	40253765	40254095	chr1	40253765	40253823	chr1-40253766:40254196	chr1	40253766	40254196	chr1
chr1	40253707	40254417	0.195294117647059	0.417876094505174	0.5	0.0714285714285714	0.636204232957571	0.240642698295787	20	0.00096568768516528	HypoHigh	chr1	40253824	40254533	FirstExon	-	BMP8B	protein_coding	chr1	40253824	40254417	0.835211267605634	0.83638928067701	CpG: 157	chr1	40253683	40255172	chr1	40253824	40254417	*	*	*	*	*	0	0	chr1-40254125:40254675	chr1	40254125	40254675	chr1	40254125	40254417	chr1-40254409:40254659	chr1	40254409	40254659	chr1
chr1	40253707	40254417	0.195294117647059	0.417876094505174	0.5	0.0714285714285714	0.636204232957571	0.240642698295787	20	0.00096568768516528	HypoHigh	chr1	40253647	40254647	Promoter	+	RP1-118J21.25	antisense	chr1	40253707	40254417	1	0.71	CpG: 157	chr1	40253683	40255172	chr1	40253707	40254417	*	*	*	*	*	0	0	chr1-40254125:40254675	chr1	40254125	40254675	chr1	40254125	40254417	chr1-40254409:40254659	chr1	40254409	40254659	chr1
chr1	41349665	41350284	0.273809523809524	0.428874289279153	0.333333333333333	0.0666666666666667	0.566813239380364	0.167752778258549	24	1.65161793441112e-05	HyperHigh	*	*	*	InterGenic	*	*	*	*	*	*	*	*	CpG: 67	chr1	41349740	41350293	chr1	41349740	41350284	*	*	*	*	*	0	0	chr1-41349745:41350375	chr1	41349745	41350375	chr1	41349745	41350284	chr1-41349809:41350121	chr1	41349809	41350121	chr1
chr1	41595259	41604764	0.0588235294117651	-0.287706856188877	1	0.928571428571429	0	0.307309364962454	48	0.0022443984331156	HypoLow	chr1	41582683	41608549	Intron6	-	SCMH1	protein_coding	chr1	41595259	41604764	1	0.367470811103379	*	*	*	*	*	0	0	*	*	*	*	*	0	0	chr1-41604320:41604490	chr1	41604320	41604490	chr1	41604320	41604490	chr1-41600042:41600312	chr1	41600042	41600312	chr1
chr1	41627557	41629829	-0.285714285714286	0.170603040279897	0.545454545454545	0.875	0.583333333333333	0.417209722462608	26	2.16147734920607e-06	HypoHigh	chr1	41627105	41651792	Intron2	-	SCMH1	protein_coding	chr1	41627557	41629829	1	0.0920322436910115	*	*	*	*	*	0	0	*	*	*	*	*	0	0	chr1-41628385:41628590	chr1	41628385	41628590	chr1	41628385	41628590	chr1-41627507:41627791	chr1	41627507	41627791	chr1
chr1	41897869	41898524	-0.418461538461538	0.125896937116821	0.4	0.846153846153846	0.486382639009082	0.331130909670121	16	0.000236419830329786	HypoHigh	*	*	*	InterGenic	*	*	*	*	*	*	*	*	*	*	*	*	*	0	0	*	*	*	*	*	0	0	chr1-41898405:41898915	chr1	41898405	41898915	chr1	41898405	41898524	chr1-41898496:41898900	chr1	41898496	41898900	chr1
chr1	41949171	41950658	0.0625	-0.222222222222222	0.888888888888889	0.8	0.306098611351497	0.482205555876069	26	0.295540488921857	HypoLow	chr1	41948260	41949717	Intron2	-	EDN2	protein_coding	chr1	41949171	41949717	0.367182246133154	0.374742621825669	*	*	*	*	*	0	0	*	*	*	*	*	0	0	chr1-41949525:41949675	chr1	41949525	41949675	chr1	41949525	41949675	chr1-41949495:41949725	chr1	41949495	41949725	chr1
chr1	41949171	41950658	0.0625	-0.222222222222222	0.888888888888889	0.8	0.306098611351497	0.482205555876069	26	0.295540488921857	HypoLow	chr1	41949718	41949874	Exon2	-	EDN2	protein_coding	chr1	41949718	41949874	0.104909213180901	1	*	*	*	*	*	0	0	*	*	*	*	*	0	0	*	*	*	*	*	0	0	chr1-41949835:41950331	chr1	41949835	41950331	chr1
chr1	41949171	41950658	0.0625	-0.222222222222222	0.888888888888889	0.8	0.306098611351497	0.482205555876069	26	0.295540488921857	HypoLow	chr1	41949875	41950208	Intron1	-	EDN2	protein_coding	chr1	41949875	41950208	0.223940820443847	1	*	*	*	*	*	0	0	*	*	*	*	*	0	0	chr1-41950005:41950255	chr1	41950005	41950255	chr1	41950005	41950208	chr1-41950207:41950523	chr1	41950207	41950523	chr1
chr1	41949171	41950658	0.0625	-0.222222222222222	0.888888888888889	0.8	0.306098611351497	0.482205555876069	26	0.295540488921857	HypoLow	chr1	41950209	41950342	FirstExon	-	EDN2	protein_coding	chr1	41950209	41950342	0.0894418291862811	1	*	*	*	*	*	0	0	*	*	*	*	*	0	0	chr1-41950260:41950515	chr1	41950260	41950515	chr1	41950260	41950342	chr1-41950307:41950581	chr1	41950307	41950581	chr1
chr1	41949171	41950658	0.0625	-0.222222222222222	0.888888888888889	0.8	0.306098611351497	0.482205555876069	26	0.295540488921857	HypoLow	chr1	41950343	41951343	Promoter	-	EDN2	protein_coding	chr1	41950343	41950658	0.211835911230666	0.315	*	*	*	*	*	0	0	*	*	*	*	*	0	0	chr1-41950625:41950995	chr1	41950625	41950995	chr1	41950625	41950658	chr1-41950307:41950581	chr1	41950307	41950581	chr1
chr1	43736176	43736767	0.24212715389186	-0.15399089525047	0.710084033613446	0.350383631713555	0.422593857155536	0.552580908834963	21	0.00153736765738655	HyperLow	chr1	43735757	43736351	Intron1	+	TMEM125	protein_coding	chr1	43736176	43736351	0.296108291032149	0.294612794612795	*	*	*	*	*	0	0	*	*	*	*	*	0	0	chr1-43736125:43737655	chr1	43736125	43737655	chr1	43736176	43736351	chr1-43736307:43736598	chr1	43736307	43736598	chr1
chr1	43736176	43736767	0.24212715389186	-0.15399089525047	0.710084033613446	0.350383631713555	0.422593857155536	0.552580908834963	21	0.00153736765738655	HyperLow	chr1	43736352	43736464	Exon2	+	TMEM125	protein_coding	chr1	43736352	43736464	0.189509306260575	1	*	*	*	*	*	0	0	*	*	*	*	*	0	0	chr1-43736125:43737655	chr1	43736125	43737655	chr1	43736352	43736464	chr1-43736447:43736807	chr1	43736447	43736807	chr1
chr1	43736176	43736767	0.24212715389186	-0.15399089525047	0.710084033613446	0.350383631713555	0.422593857155536	0.552580908834963	21	0.00153736765738655	HyperLow	chr1	43736465	43737854	Intron2	+	TMEM125	protein_coding	chr1	43736465	43736767	0.510998307952623	0.217422606191505	*	*	*	*	*	0	0	*	*	*	*	*	0	0	chr1-43736125:43737655	chr1	43736125	43737655	chr1	43736465	43736767	chr1-43736726:43737146	chr1	43736726	43737146	chr1
chr1	43814602	43815322	0.16	-0.259538300772357	1	0.777777777777778	0.17418645817898	0.425871145606372	24	2.50730789102159e-07	HypoLow	chr1	43814514	43814673	Exon9	+	MPL	protein_coding	chr1	43814602	43814673	0.0986111111111111	0.446540880503145	CpG: 76	chr1	43814305	43815277	chr1	43814602	43814673	*	*	*	*	*	0	0	chr1-43814485:43815315	chr1	43814485	43815315	chr1	43814602	43814673	chr1-43814659:43815335	chr1	43814659	43815335	chr1
chr1	43814602	43815322	0.16	-0.259538300772357	1	0.777777777777778	0.17418645817898	0.425871145606372	24	2.50730789102159e-07	HypoLow	chr1	43814674	43814933	Intron9	+	MPL	protein_coding	chr1	43814674	43814933	0.359722222222222	1	CpG: 76	chr1	43814305	43815277	chr1	43814674	43814933	*	*	*	*	*	0	0	chr1-43814485:43815315	chr1	43814485	43815315	chr1	43814674	43814933	chr1-43814926:43815326	chr1	43814926	43815326	chr1
chr1	43814602	43815322	0.16	-0.259538300772357	1	0.777777777777778	0.17418645817898	0.425871145606372	24	2.50730789102159e-07	HypoLow	chr1	43814934	43815030	Exon10	+	MPL	protein_coding	chr1	43814934	43815030	0.133333333333333	1	CpG: 76	chr1	43814305	43815277	chr1	43814934	43815030	*	*	*	*	*	0	0	chr1-43814485:43815315	chr1	43814485	43815315	chr1	43814934	43815030	chr1-43815029:43815576	chr1	43815029	43815576	chr1
chr1	43814602	43815322	0.16	-0.259538300772357	1	0.777777777777778	0.17418645817898	0.425871145606372	24	2.50730789102159e-07	HypoLow	chr1	43815031	43817886	Intron10	+	MPL	protein_coding	chr1	43815031	43815322	0.404166666666667	0.101926444833625	CpG: 76	chr1	43814305	43815277	chr1	43815031	43815277	*	*	*	*	*	0	0	chr1-43814485:43815315	chr1	43814485	43815315	chr1	43815031	43815315	chr1-43815222:43815442	chr1	43815222	43815442	chr1
chr1	45279366	45280037	0.247058823529412	0.109839708958446	0.6	0.333333333333333	0.450548038384464	0.374037892369703	18	0.00213432607206155	HyperHigh	chr1	45279310	45279598	LastExon	+	BTBD19	protein_coding	chr1	45279366	45279598	0.34575260804769	0.805555555555556	CpG: 84	chr1	45278765	45279644	chr1	45279366	45279598	*	*	*	*	*	0	0	chr1-45279365:45279815	chr1	45279365	45279815	chr1	45279366	45279598	chr1-45279588:45279972	chr1	45279588	45279972	chr1
chr1	45985288	45986119	-0.430769230769231	0.201302776471585	0.282051282051282	0.894444444444444	0.507309364962454	0.319715972342415	17	8.7233820333623e-05	HypoHigh	chr1	45984727	45987500	Intron1	-	PRDX1	protein_coding	chr1	45985288	45986119	1	0.299675441759827	*	*	*	*	*	0	0	*	*	*	*	*	0	0	chr1-45985945:45986190	chr1	45985945	45986190	chr1	45985945	45986119	chr1-45986093:45986523	chr1	45986093	45986523	chr1
chr1	46669279	46669722	0.297213622291022	0.104666085247224	0.642857142857143	0.222222222222222	0.5	0.486382639009082	12	0.00523283225333298	HyperHigh	chr1	46663544	46685376	Intron1	-	POMGNT1	protein_coding	chr1	46669279	46669722	1	0.0202913155001832	*	*	*	*	*	0	0	*	*	*	*	*	0	0	chr1-46668560:46670470	chr1	46668560	46670470	chr1	46669279	46669722	chr1-46669285:46669785	chr1	46669285	46669785	chr1
chr1	46669279	46669722	0.297213622291022	0.104666085247224	0.642857142857143	0.222222222222222	0.5	0.486382639009082	12	0.00523283225333298	HyperHigh	chr1	46669006	46669296	FirstExon	+	LURAP1	protein_coding	chr1	46669279	46669296	0.0383747178329571	0.0586206896551724	*	*	*	*	*	0	0	*	*	*	*	*	0	0	chr1-46668560:46670470	chr1	46668560	46670470	chr1	46669279	46669296	chr1-46669285:46669785	chr1	46669285	46669785	chr1
chr1	46669279	46669722	0.297213622291022	0.104666085247224	0.642857142857143	0.222222222222222	0.5	0.486382639009082	12	0.00523283225333298	HyperHigh	chr1	46669297	46685370	Intron1	+	LURAP1	protein_coding	chr1	46669297	46669722	0.959367945823928	0.0264418590182293	*	*	*	*	*	0	0	*	*	*	*	*	0	0	chr1-46668560:46670470	chr1	46668560	46670470	chr1	46669297	46669722	chr1-46669285:46669785	chr1	46669285	46669785	chr1
chr1	46859804	46860403	0.724264705882353	-0.185106240242238	0.933333333333333	0.1375	0.262580438494626	0.464384955291979	17	2.18911689813077e-05	HyperLow	chr1	46858936	46859936	Promoter	+	FAAH	protein_coding	chr1	46859804	46859936	0.220367278797997	0.132	CpG: 71	chr1	46859724	46860291	chr1	46859804	46859936	*	*	*	*	*	0	0	chr1-46859840:46860650	chr1	46859840	46860650	chr1	46859840	46859936	chr1-46859925:46860261	chr1	46859925	46860261	chr1
chr1	46859804	46860403	0.724264705882353	-0.185106240242238	0.933333333333333	0.1375	0.262580438494626	0.464384955291979	17	2.18911689813077e-05	HyperLow	chr1	46859937	46860215	FirstExon	+	FAAH	protein_coding	chr1	46859937	46860215	0.464106844741235	1	CpG: 71	chr1	46859724	46860291	chr1	46859937	46860215	*	*	*	*	*	0	0	chr1-46859840:46860650	chr1	46859840	46860650	chr1	46859937	46860215	chr1-46860194:46860624	chr1	46860194	46860624	chr1
chr1	46859804	46860403	0.724264705882353	-0.185106240242238	0.933333333333333	0.1375	0.262580438494626	0.464384955291979	17	2.18911689813077e-05	HyperLow	chr1	46860216	46867762	Intron1	+	FAAH	protein_coding	chr1	46860216	46860403	0.312186978297162	0.0247813411078717	CpG: 71	chr1	46859724	46860291	chr1	46860216	46860291	*	*	*	*	*	0	0	chr1-46859840:46860650	chr1	46859840	46860650	chr1	46860216	46860403	chr1-46860367:46860698	chr1	46860367	46860698	chr1
chr1	46991752	46992561	0.309090909090909	0.222551950394947	0.533333333333333	0.222222222222222	0.63943194468483	0.45698353148489	16	0.0118360889091265	HyperHigh	*	*	*	InterGenic	*	*	*	*	*	*	*	*	*	*	*	*	*	0	0	*	*	*	*	*	0	0	chr1-46992540:46992995	chr1	46992540	46992995	chr1	46992540	46992561	chr1-46992547:46992997	chr1	46992547	46992997	chr1
chr1	47007437	47009575	0.080128205128205	-0.200219881199238	0.825757575757575	0.720779220779221	0.306098611351497	0.561881834396728	23	0.311263225394879	HypoLow	chr1	47006682	47009365	Intron2	+	MKNK1-AS1	antisense	chr1	47007437	47009365	0.90177736202058	0.718598583674991	*	*	*	*	*	0	0	*	*	*	*	*	0	0	chr1-47008985:47009575	chr1	47008985	47009575	chr1	47008985	47009365	chr1-47009298:47010400	chr1	47009298	47010400	chr1
chr1	47007437	47009575	0.080128205128205	-0.200219881199238	0.825757575757575	0.720779220779221	0.306098611351497	0.561881834396728	23	0.311263225394879	HypoLow	chr1	47009366	47009440	Exon3	+	MKNK1-AS1	antisense	chr1	47009366	47009440	0.0346117867165575	1	*	*	*	*	*	0	0	*	*	*	*	*	0	0	chr1-47008985:47009575	chr1	47008985	47009575	chr1	47009366	47009440	chr1-47009298:47010400	chr1	47009298	47010400	chr1
chr1	47007437	47009575	0.080128205128205	-0.200219881199238	0.825757575757575	0.720779220779221	0.306098611351497	0.561881834396728	23	0.311263225394879	HypoLow	chr1	47009441	47023896	Intron3	+	MKNK1-AS1	antisense	chr1	47009441	47009575	0.0626753975678204	0.00927014873746109	*	*	*	*	*	0	0	*	*	*	*	*	0	0	chr1-47008985:47009575	chr1	47008985	47009575	chr1	47009441	47009575	chr1-47009560:47009848	chr1	47009560	47009848	chr1
chr1	47009602	47011533	0.097222222222222	0.270426041486378	0.230769230769231	0.0909090909090909	0.459594497828725	0.216674140549451	32	0.0696157135097654	HypoHigh	chr1	47009441	47023896	Intron3	+	MKNK1-AS1	antisense	chr1	47009602	47011533	1	0.133586994119682	CpG: 49	chr1	47009575	47010132	chr1	47009602	47010132	*	*	*	*	*	0	0	chr1-47011045:47011575	chr1	47011045	47011575	chr1	47011045	47011533	chr1-47010628:47010859	chr1	47010628	47010859	chr1
chr1	47051582	47053380	-0.120772946859904	0.25908163214679	0.82463768115942	0.961538461538461	0.448490360726655	0.262580438494626	23	0.0224153628161981	HypoHigh	chr1	47049002	47059784	Intron2	-	MKNK1	protein_coding	chr1	47051582	47053380	1	0.166759413837878	*	*	*	*	*	0	0	*	*	*	*	*	0	0	chr1-47052840:47052990	chr1	47052840	47052990	chr1	47052840	47052990	chr1-47052811:47052996	chr1	47052811	47052996	chr1
chr1	47489194	47490420	0.0909090909090911	0.282036104791712	0.166666666666667	0	0.486382639009082	0.123744108880292	30	0.0021189587744451	HypoHigh	chr1	47488239	47489239	Promoter	+	CYP4X1	protein_coding	chr1	47489194	47489239	0.0367047308319739	0.045	CpG: 40	chr1	47489226	47489633	chr1	47489226	47489239	*	*	*	*	*	0	0	chr1-47488920:47489990	chr1	47488920	47489990	chr1	47489194	47489239	chr1-47489228:47489992	chr1	47489228	47489992	chr1
chr1	47489194	47490420	0.0909090909090911	0.282036104791712	0.166666666666667	0	0.486382639009082	0.123744108880292	30	0.0021189587744451	HypoHigh	chr1	47489240	47489666	FirstExon	+	CYP4X1	protein_coding	chr1	47489240	47489666	0.34747145187602	1	CpG: 40	chr1	47489226	47489633	chr1	47489240	47489633	*	*	*	*	*	0	0	chr1-47488920:47489990	chr1	47488920	47489990	chr1	47489240	47489666	chr1-47489645:47489929	chr1	47489645	47489929	chr1
chr1	47489194	47490420	0.0909090909090911	0.282036104791712	0.166666666666667	0	0.486382639009082	0.123744108880292	30	0.0021189587744451	HypoHigh	chr1	47489667	47495661	Intron1	+	CYP4X1	protein_coding	chr1	47489667	47490420	0.614192495921697	0.125625625625626	*	*	*	*	*	0	0	*	*	*	*	*	0	0	chr1-47490205:47490575	chr1	47490205	47490575	chr1	47490205	47490420	chr1-47489645:47489929	chr1	47489645	47489929	chr1
chr1	47694979	47696347	-0.0313492063492065	-0.206223871362512	0.472222222222222	0.41875	0.469961038363309	0.61412366439237	31	0.767376934429287	HypoLow	chr1	47694868	47695023	Exon2	-	TAL1	protein_coding	chr1	47694979	47695023	0.0321637426900585	0.283870967741935	*	*	*	*	*	0	0	*	*	*	*	*	0	0	chr1-47693265:47695155	chr1	47693265	47695155	chr1	47694979	47695023	chr1-47695003:47695090	chr1	47695003	47695090	chr1
chr1	47694979	47696347	-0.0313492063492065	-0.206223871362512	0.472222222222222	0.41875	0.469961038363309	0.61412366439237	31	0.767376934429287	HypoLow	chr1	47695024	47697328	Intron1	-	TAL1	protein_coding	chr1	47695024	47696347	0.967105263157895	0.57421875	*	*	*	*	*	0	0	*	*	*	*	*	0	0	chr1-47695880:47696435	chr1	47695880	47696435	chr1	47695880	47696347	chr1-47696342:47696882	chr1	47696342	47696882	chr1
chr1	47694979	47696347	-0.0313492063492065	-0.206223871362512	0.472222222222222	0.41875	0.469961038363309	0.61412366439237	31	0.767376934429287	HypoLow	chr1	47692835	47696422	LastExon	+	RP1-18D14.7	antisense	chr1	47694979	47696347	1	0.381377195427934	*	*	*	*	*	0	0	*	*	*	*	*	0	0	chr1-47695880:47696435	chr1	47695880	47696435	chr1	47695880	47696347	chr1-47696342:47696882	chr1	47696342	47696882	chr1
chr1	47881932	47883053	0.32579185520362	0.310085105435012	0.416666666666667	0.0526315789473684	0.579422976025488	0.197224259527442	30	5.89085654820774e-09	HyperHigh	chr1	47881744	47883723	FirstExon	+	FOXE3	protein_coding	chr1	47881932	47883053	1	0.56644770085902	CpG: 118	chr1	47881896	47883065	chr1	47881932	47883053	*	*	*	*	*	0	0	chr1-47882200:47883035	chr1	47882200	47883035	chr1	47882200	47883035	chr1-47882314:47883377	chr1	47882314	47883377	chr1
chr1	47898446	47899560	0.211184210526316	0.171723497165579	0.458041958041958	0.154761904761905	0.574611966969148	0.392725600653389	39	7.84928516438939e-06	HyperHigh	chr1	47897805	47900313	FirstExon	-	FOXD2-AS1	antisense	chr1	47898446	47899560	1	0.444178628389155	CpG: 20	chr1	47899125	47899398	chr1	47899125	47899398	*	*	*	*	*	0	0	chr1-47899245:47899675	chr1	47899245	47899675	chr1	47899245	47899560	chr1-47899053:47901054	chr1	47899053	47901054	chr1
chr1	48462257	48463215	0.141847041847042	0.240642698295787	0.190909090909091	0.0185185185185185	0.323650198151556	0.0876796200801874	33	0.00033528855021664	HypoHigh	chr1	48460270	48462359	Intron1	-	TRABD2B	protein_coding	chr1	48462257	48462359	0.106471816283925	0.0488271900430828	CpG: 90	chr1	48462131	48462976	chr1	48462257	48462359	*	*	*	*	*	0	0	chr1-48460965:48463590	chr1	48460965	48463590	chr1	48462257	48462359	chr1-48462180:48463178	chr1	48462180	48463178	chr1
chr1	48462257	48463215	0.141847041847042	0.240642698295787	0.190909090909091	0.0185185185185185	0.323650198151556	0.0876796200801874	33	0.00033528855021664	HypoHigh	chr1	48462360	48462567	FirstExon	-	TRABD2B	protein_coding	chr1	48462360	48462567	0.2160751565762	1	CpG: 90	chr1	48462131	48462976	chr1	48462360	48462567	*	*	*	*	*	0	0	chr1-48460965:48463590	chr1	48460965	48463590	chr1	48462360	48462567	chr1-48462180:48463178	chr1	48462180	48463178	chr1
chr1	48462257	48463215	0.141847041847042	0.240642698295787	0.190909090909091	0.0185185185185185	0.323650198151556	0.0876796200801874	33	0.00033528855021664	HypoHigh	chr1	48462568	48463568	Promoter	-	TRABD2B	protein_coding	chr1	48462568	48463215	0.675365344467641	0.647	CpG: 90	chr1	48462131	48462976	chr1	48462568	48462976	*	*	*	*	*	0	0	chr1-48460965:48463590	chr1	48460965	48463590	chr1	48462568	48463215	chr1-48463211:48463751	chr1	48463211	48463751	chr1
chr1	48934280	48937221	0.0427631578947369	-0.266212596781063	0.777777777777778	0.466666666666667	0.328409378678084	0.507309364962454	32	0.363146564794239	HypoLow	chr1	48918804	48937629	Intron1	-	SPATA6	protein_coding	chr1	48934280	48937221	1	0.156228419654714	*	*	*	*	*	0	0	chr1:48936089-48936471	chr1	48936089	48936471	chr1	48936089	48936471	chr1-48936745:48937110	chr1	48936745	48937110	chr1	48936745	48937110	chr1-48937219:48938110	chr1	48937219	48938110	chr1
chr1	48937249	48938330	0.102272727272727	0.294784638377482	0.171568627450981	0	0.54106976743176	0.137938950101211	35	2.26318415257252e-05	HypoHigh	chr1	48918804	48937629	Intron1	-	SPATA6	protein_coding	chr1	48937249	48937629	0.351526364477336	0.0201859229747676	CpG: 28	chr1	48937304	48937683	chr1	48937304	48937629	*	*	*	*	*	0	0	chr1-48937300:48937750	chr1	48937300	48937750	chr1	48937300	48937629	chr1-48937619:48938055	chr1	48937619	48938055	chr1
chr1	48937249	48938330	0.102272727272727	0.294784638377482	0.171568627450981	0	0.54106976743176	0.137938950101211	35	2.26318415257252e-05	HypoHigh	chr1	48937630	48937845	FirstExon	-	SPATA6	protein_coding	chr1	48937630	48937845	0.198889916743756	1	CpG: 28	chr1	48937304	48937683	chr1	48937630	48937683	*	*	*	*	*	0	0	chr1-48937805:48938155	chr1	48937805	48938155	chr1	48937805	48937845	chr1-48937809:48938399	chr1	48937809	48938399	chr1
chr1	48937249	48938330	0.102272727272727	0.294784638377482	0.171568627450981	0	0.54106976743176	0.137938950101211	35	2.26318415257252e-05	HypoHigh	chr1	48937846	48938846	Promoter	-	SPATA6	protein_coding	chr1	48937846	48938330	0.447733580018501	0.484	*	*	*	*	*	0	0	*	*	*	*	*	0	0	chr1-48938165:48938615	chr1	48938165	48938615	chr1	48938165	48938330	chr1-48938017:48938198	chr1	48938017	48938198	chr1
chr1	50489397	50489953	0.361111111111111	0.273126214466372	0.625	0.0690476190476191	0.585613221070564	0.293941128446154	17	6.33978300379627e-05	HyperHigh	chr1	50317191	50489434	Intron1	-	AGBL4	protein_coding	chr1	50489397	50489434	0.0665467625899281	0.000214812793553294	CpG: 40	chr1	50489417	50489846	chr1	50489417	50489434	*	*	*	*	*	0	0	chr1-50489420:50489815	chr1	50489420	50489815	chr1	50489420	50489434	chr1-50489421:50489771	chr1	50489421	50489771	chr1
chr1	50489397	50489953	0.361111111111111	0.273126214466372	0.625	0.0690476190476191	0.585613221070564	0.293941128446154	17	6.33978300379627e-05	HyperHigh	chr1	50489435	50489585	FirstExon	-	AGBL4	protein_coding	chr1	50489435	50489585	0.26978417266187	1	CpG: 40	chr1	50489417	50489846	chr1	50489435	50489585	*	*	*	*	*	0	0	chr1-50489420:50489815	chr1	50489420	50489815	chr1	50489435	50489585	chr1-50489541:50489661	chr1	50489541	50489661	chr1
chr1	50489397	50489953	0.361111111111111	0.273126214466372	0.625	0.0690476190476191	0.585613221070564	0.293941128446154	17	6.33978300379627e-05	HyperHigh	chr1	50489586	50490586	Promoter	-	AGBL4	protein_coding	chr1	50489586	50489953	0.660071942446043	0.367	CpG: 40	chr1	50489417	50489846	chr1	50489586	50489846	*	*	*	*	*	0	0	chr1-50489420:50489815	chr1	50489420	50489815	chr1	50489586	50489815	chr1-50489609:50489849	chr1	50489609	50489849	chr1
chr1	50513477	50514445	0.358585858585858	0.120189351771723	0.5	0.0714285714285714	0.528320833573719	0.333333333333333	30	7.14919321572536e-05	HyperHigh	*	*	*	InterGenic	*	*	*	*	*	*	*	*	CpG: 71	chr1	50513644	50514320	chr1	50513644	50514320	*	*	*	*	*	0	0	chr1-50514140:50514290	chr1	50514140	50514290	chr1	50514140	50514290	chr1-50514315:50514699	chr1	50514315	50514699	chr1
chr1	50880319	50884129	0.099415204678363	0.203583124082814	0.208333333333333	0.0714285714285714	0.500090781869469	0.270426041486378	100	2.29958570102603e-07	HypoHigh	chr1	50883222	50885406	LastExon	-	DMRTA2	protein_coding	chr1	50883222	50884129	0.238057742782152	0.41529304029304	CpG: 36	chr1	50882997	50883426	chr1	50883222	50883426	*	*	*	*	*	0	0	chr1-50883845:50885555	chr1	50883845	50885555	chr1	50883845	50884129	chr1-50883743:50884775	chr1	50883743	50884775	chr1
chr1	50885965	50889461	0.133333333333333	0.249194893274858	0.25	0.0625	0.508744969983174	0.272229696105007	106	2.20582153409603e-08	HypoHigh	chr1	50885407	50886649	Intron2	-	DMRTA2	protein_coding	chr1	50885965	50886649	0.195652173913043	0.550724637681159	CpG: 480	chr1	50884228	50891471	chr1	50885965	50886649	*	*	*	*	*	0	0	chr1-50886585:50887015	chr1	50886585	50887015	chr1	50886585	50886649	chr1-50886619:50887422	chr1	50886619	50887422	chr1
chr1	50885965	50889461	0.133333333333333	0.249194893274858	0.25	0.0625	0.508744969983174	0.272229696105007	106	2.20582153409603e-08	HypoHigh	chr1	50886650	50887216	Exon2	-	DMRTA2	protein_coding	chr1	50886650	50887216	0.161899313501144	1	CpG: 480	chr1	50884228	50891471	chr1	50886650	50887216	*	*	*	*	*	0	0	chr1-50887105:50887755	chr1	50887105	50887755	chr1	50887105	50887216	chr1-50886753:50887078	chr1	50886753	50887078	chr1
chr1	50885965	50889461	0.133333333333333	0.249194893274858	0.25	0.0625	0.508744969983174	0.272229696105007	106	2.20582153409603e-08	HypoHigh	chr1	50887217	50888787	Intron1	-	DMRTA2	protein_coding	chr1	50887217	50888787	0.44908466819222	1	CpG: 480	chr1	50884228	50891471	chr1	50887217	50888787	*	*	*	*	*	0	0	chr1-50887765:50888915	chr1	50887765	50888915	chr1	50887765	50888787	chr1-50888540:50889462	chr1	50888540	50889462	chr1
chr1	50885965	50889461	0.133333333333333	0.249194893274858	0.25	0.0625	0.508744969983174	0.272229696105007	106	2.20582153409603e-08	HypoHigh	chr1	50888788	50889172	FirstExon	-	DMRTA2	protein_coding	chr1	50888788	50889172	0.109839816933638	1	CpG: 480	chr1	50884228	50891471	chr1	50888788	50889172	*	*	*	*	*	0	0	chr1-50889020:50890435	chr1	50889020	50890435	chr1	50889020	50889172	chr1-50889136:50889636	chr1	50889136	50889636	chr1
chr1	50885965	50889461	0.133333333333333	0.249194893274858	0.25	0.0625	0.508744969983174	0.272229696105007	106	2.20582153409603e-08	HypoHigh	chr1	50889173	50890173	Promoter	-	DMRTA2	protein_coding	chr1	50889173	50889461	0.0823798627002288	0.288	CpG: 480	chr1	50884228	50891471	chr1	50889173	50889461	*	*	*	*	*	0	0	chr1-50889020:50890435	chr1	50889020	50890435	chr1	50889173	50889461	chr1-50889136:50889636	chr1	50889136	50889636	chr1
chr1	51437431	51438155	-0.461111111111111	0.153049305675748	0.428571428571429	0.866666666666667	0.552580908834963	0.476637056991957	8	0.00214070973158512	HypoHigh	chr1	51436170	51439564	Intron3	+	CDKN2C	protein_coding	chr1	51437431	51438155	1	0.213317619328226	*	*	*	*	*	0	0	*	*	*	*	*	0	0	chr1-51437900:51438050	chr1	51437900	51438050	chr1	51437900	51438050	chr1-51437585:51437981	chr1	51437585	51437981	chr1
chr1	53308477	53309726	0.26875	0.263494346862391	0.44949494949495	0.0839160839160839	0.621255684130182	0.36590349698614	45	4.0368243639465e-06	HyperHigh	chr1	53308183	53308645	FirstExon	+	ZYG11A	protein_coding	chr1	53308477	53308645	0.134507606084868	0.363636363636364	CpG: 112	chr1	53308294	53309262	chr1	53308477	53308645	*	*	*	*	*	0	0	chr1-53308205:53308575	chr1	53308205	53308575	chr1	53308477	53308575	chr1-53308641:53309336	chr1	53308641	53309336	chr1
chr1	53308477	53309726	0.26875	0.263494346862391	0.44949494949495	0.0839160839160839	0.621255684130182	0.36590349698614	45	4.0368243639465e-06	HyperHigh	chr1	53308646	53320136	Intron1	+	ZYG11A	protein_coding	chr1	53308646	53309726	0.864691753402722	0.0939947780678851	CpG: 112	chr1	53308294	53309262	chr1	53308646	53309262	*	*	*	*	*	0	0	chr1-53309520:53309995	chr1	53309520	53309995	chr1	53309520	53309726	chr1-53309691:53310035	chr1	53309691	53310035	chr1
chr1	53387007	53387137	0.353771228771229	0.285251964747393	0.625	0.125	0.37690703911236	0.138683800614544	7	0.0300577569306801	HyperHigh	chr1	53377463	53387224	Intron1	-	ECHDC2	protein_coding	chr1	53387007	53387137	1	0.0133183075504559	CpG: 81	chr1	53386617	53387523	chr1	53387007	53387137	*	*	*	*	*	0	0	chr1-53387025:53387555	chr1	53387025	53387555	chr1	53387025	53387137	chr1-53387134:53387607	chr1	53387134	53387607	chr1
chr1	53528743	53529115	0.210526315789474	0.050773626523447	0.25	0.0769230769230769	0.45698353148489	0.381703471460528	16	0.0133710610172321	HyperHigh	chr1	53527981	53529041	Intron1	+	PODN	protein_coding	chr1	53528743	53529041	0.801075268817204	0.281132075471698	CpG: 117	chr1	53527572	53528974	chr1	53528743	53528974	*	*	*	*	*	0	0	chr1-53528485:53529835	chr1	53528485	53529835	chr1	53528743	53529041	chr1-53528478:53528858	chr1	53528478	53528858	chr1
chr1	53528743	53529115	0.210526315789474	0.050773626523447	0.25	0.0769230769230769	0.45698353148489	0.381703471460528	16	0.0133710610172321	HyperHigh	chr1	53529042	53529231	Exon2	+	PODN	protein_coding	chr1	53529042	53529115	0.196236559139785	0.386243386243386	*	*	*	*	*	0	0	*	*	*	*	*	0	0	chr1-53528485:53529835	chr1	53528485	53529835	chr1	53529042	53529115	chr1-53528386:53529470	chr1	53528386	53529470	chr1
chr1	53600728	53601950	-0.253030303030303	0.186138743447971	0.625874125874125	0.933035714285715	0.417209722462608	0.240642698295787	23	0.000116126142801544	HypoHigh	chr1	53600102	53607986	Intron1	-	SLC1A7	protein_coding	chr1	53600728	53601950	1	0.154997463216641	*	*	*	*	*	0	0	*	*	*	*	*	0	0	chr1-53601445:53601790	chr1	53601445	53601790	chr1	53601445	53601790	chr1-53601616:53601768	chr1	53601616	53601768	chr1
chr1	54104345	54105349	0.150793650793651	-0.227646107746058	0.9	0.736842105263158	0.270426041486378	0.554832593066821	22	0.00186760193372016	HypoLow	chr1	54065952	54199576	Intron1	-	GLIS1	protein_coding	chr1	54104345	54105349	1	0.00751362030772915	*	*	*	*	*	0	0	*	*	*	*	*	0	0	chr1-54104785:54105595	chr1	54104785	54105595	chr1	54104785	54105349	chr1-54104979:54105284	chr1	54104979	54105284	chr1
chr1	54171648	54173094	0.125	-0.21713904140645	1	0.769230769230769	0.270426041486378	0.5	14	0.00822651354883384	HypoLow	chr1	54065952	54199576	Intron1	-	GLIS1	protein_coding	chr1	54171648	54173094	1	0.0108214093276657	*	*	*	*	*	0	0	*	*	*	*	*	0	0	chr1-54172845:54173050	chr1	54172845	54173050	chr1	54172845	54173050	chr1-54172185:54172589	chr1	54172185	54172589	chr1
chr1	55266382	55266705	0.323076923076923	0.342411573993946	0.533333333333333	0.0769230769230769	0.706026069783236	0.272229696105007	14	0.00474440931514158	HyperHigh	chr1	55266270	55266940	FirstExon	-	TTC22	protein_coding	chr1	55266382	55266705	1	0.482089552238806	CpG: 80	chr1	55266277	55267058	chr1	55266382	55266705	*	*	*	*	*	0	0	chr1-55266385:55267150	chr1	55266385	55267150	chr1	55266385	55266705	chr1-55266558:55267740	chr1	55266558	55267740	chr1
chr1	57109250	57111804	0.166666666666667	0.333333333333333	0.307692307692308	0.0769230769230769	0.554832593066821	0.240642698295787	48	0.000394082504943514	HypoHigh	chr1	57109994	57110994	Promoter	+	PRKAA2	protein_coding	chr1	57109994	57110994	0.391542678151919	1	CpG: 73	chr1	57110663	57111337	chr1	57110663	57110994	*	*	*	*	*	0	0	chr1-57110725:57111395	chr1	57110725	57111395	chr1	57110725	57110994	chr1-57110977:57111284	chr1	57110977	57111284	chr1
chr1	57109250	57111804	0.166666666666667	0.333333333333333	0.307692307692308	0.0769230769230769	0.554832593066821	0.240642698295787	48	0.000394082504943514	HypoHigh	chr1	57110995	57111154	FirstExon	+	PRKAA2	protein_coding	chr1	57110995	57111154	0.062255285826155	1	CpG: 73	chr1	57110663	57111337	chr1	57110995	57111154	*	*	*	*	*	0	0	chr1-57110725:57111395	chr1	57110725	57111395	chr1	57110995	57111154	chr1-57111116:57111277	chr1	57111116	57111277	chr1
chr1	57109250	57111804	0.166666666666667	0.333333333333333	0.307692307692308	0.0769230769230769	0.554832593066821	0.240642698295787	48	0.000394082504943514	HypoHigh	chr1	57111155	57140053	Intron1	+	PRKAA2	protein_coding	chr1	57111155	57111804	0.254111198120595	0.0224583016125683	CpG: 73	chr1	57110663	57111337	chr1	57111155	57111337	*	*	*	*	*	0	0	chr1-57111400:57112135	chr1	57111400	57112135	chr1	57111400	57111804	chr1-57111599:57111935	chr1	57111599	57111935	chr1
chr1	57887007	57891268	0.119934640522875	0.212010679187799	0.22875816993464	0.0555555555555556	0.514524960703384	0.256120307243458	105	1.29621419085228e-10	HypoHigh	chr1	57756839	58115263	Intron7	-	DAB1	protein_coding	chr1	57887007	57891268	1	0.0118881548110618	CpG: 192	chr1	57887963	57890637	chr1	57887963	57890637	chr1:57887813-57887926	chr1	57887813	57887926	chr1	57887813	57887926	chr1-57891145:57891535	chr1	57891145	57891535	chr1	57891145	57891268	chr1-57890335:57890596	chr1	57890335	57890596	chr1
chr1	59280092	59280840	-0.252597402597402	0.106785833384026	0.5	0.836870026525199	0.607605200117505	0.514403903129512	21	0.000754412952627136	HypoHigh	chr1	59250978	59359216	Intron1	+	RP4-794H19.2	lincRNA	chr1	59280092	59280840	1	0.00691069679779745	CpG: 28	chr1	59280240	59280490	chr1	59280240	59280490	chr1:59280773-59281281	chr1	59280773	59281281	chr1	59280773	59280840	chr1-59279880:59281675	chr1	59279880	59281675	chr1	59280092	59280840	chr1-59280836:59281494	chr1	59280836	59281494	chr1
chr1	59961969	59964554	-0.122222222222222	0.348316732506451	0.829326923076923	1	0.441315749917037	0	19	0.00104009384166989	HypoHigh	chr1	59922749	59977982	Intron6	+	FGGY	protein_coding	chr1	59961969	59964554	1	0.0468017308493111	*	*	*	*	*	0	0	*	*	*	*	*	0	0	chr1-59964380:59964675	chr1	59964380	59964675	chr1	59964380	59964554	chr1-59964473:59964586	chr1	59964473	59964586	chr1
chr1	60280019	60281076	0.333333333333333	0.301336631613914	0.5	0.1	0.6412649802318	0.306098611351497	34	3.22336754326284e-08	HyperHigh	chr1	60279532	60280532	Promoter	+	HOOK1	protein_coding	chr1	60280019	60280532	0.485335856196783	0.513	*	*	*	*	*	0	0	*	*	*	*	*	0	0	chr1-60280160:60280595	chr1	60280160	60280595	chr1	60280160	60280532	chr1-60280527:60281031	chr1	60280527	60281031	chr1
chr1	60280019	60281076	0.333333333333333	0.301336631613914	0.5	0.1	0.6412649802318	0.306098611351497	34	3.22336754326284e-08	HyperHigh	chr1	60280533	60280852	FirstExon	+	HOOK1	protein_coding	chr1	60280533	60280852	0.301797540208136	1	CpG: 49	chr1	60280624	60281048	chr1	60280624	60280852	*	*	*	*	*	0	0	chr1-60280725:60281135	chr1	60280725	60281135	chr1	60280725	60280852	chr1-60280829:60281113	chr1	60280829	60281113	chr1
chr1	60280019	60281076	0.333333333333333	0.301336631613914	0.5	0.1	0.6412649802318	0.306098611351497	34	3.22336754326284e-08	HyperHigh	chr1	60280853	60287529	Intron1	+	HOOK1	protein_coding	chr1	60280853	60281076	0.210974456007569	0.0334032354703415	CpG: 49	chr1	60280624	60281048	chr1	60280853	60281048	*	*	*	*	*	0	0	chr1-60280725:60281135	chr1	60280725	60281135	chr1	60280853	60281076	chr1-60281058:60281569	chr1	60281058	60281569	chr1
chr1	60539315	60539733	0.370629370629371	0.30646064854879	0.705882352941177	0.0909090909090909	0.552580908834963	0.306098611351497	16	0.000169598612986433	HyperHigh	chr1	60538343	60539361	Intron1	-	C1orf87	protein_coding	chr1	60539315	60539361	0.110047846889952	0.0451866404715128	CpG: 23	chr1	60539315	60539540	chr1	60539315	60539361	*	*	*	*	*	0	0	*	*	*	*	*	0	0	chr1-60539321:60539781	chr1	60539321	60539781	chr1
chr1	60539315	60539733	0.370629370629371	0.30646064854879	0.705882352941177	0.0909090909090909	0.552580908834963	0.306098611351497	16	0.000169598612986433	HyperHigh	chr1	60539362	60539442	FirstExon	-	C1orf87	protein_coding	chr1	60539362	60539442	0.191387559808612	1	CpG: 23	chr1	60539315	60539540	chr1	60539362	60539442	*	*	*	*	*	0	0	chr1-60539400:60539595	chr1	60539400	60539595	chr1	60539400	60539442	chr1-60539430:60539810	chr1	60539430	60539810	chr1
chr1	60539315	60539733	0.370629370629371	0.30646064854879	0.705882352941177	0.0909090909090909	0.552580908834963	0.306098611351497	16	0.000169598612986433	HyperHigh	chr1	60539443	60540443	Promoter	-	C1orf87	protein_coding	chr1	60539443	60539733	0.69377990430622	0.29	CpG: 23	chr1	60539315	60539540	chr1	60539443	60539540	*	*	*	*	*	0	0	chr1-60539620:60539810	chr1	60539620	60539810	chr1	60539620	60539733	chr1-60539430:60539810	chr1	60539430	60539810	chr1
chr1	61508305	61509436	0.244318181818182	0.0972054604171765	0.488888888888888	0.108187134502924	0.525985515862637	0.422688729319169	37	2.0468811240882e-05	HyperHigh	chr1	61331139	61553820	Intron1	+	NFIA	protein_coding	chr1	61508305	61509436	1	0.00507901437482318	CpG: 70	chr1	61508642	61509282	chr1	61508642	61509282	chr1:61509124-61509443	chr1	61509124	61509443	chr1	61509124	61509436	chr1-61508680:61509455	chr1	61508680	61509455	chr1	61508680	61509436	chr1-61509384:61510040	chr1	61509384	61510040	chr1
chr1	62208667	62209230	0.217391304347826	0.075488750216347	0.529411764705882	0.157894736842105	0.468546354076522	0.431820614746107	16	0.0419277712740927	HyperHigh	chr1	62208097	62209097	Promoter	-	RP11-430G17.3	lincRNA	chr1	62208667	62209097	0.763765541740675	0.43	CpG: 89	chr1	62207827	62208818	chr1	62208667	62208818	chr1:62208815-62209373	chr1	62208815	62209373	chr1	62208815	62209097	chr1-62208265:62209295	chr1	62208265	62209295	chr1	62208667	62209097	chr1-62208981:62209221	chr1	62208981	62209221	chr1
chr1	62208667	62209230	0.217391304347826	0.075488750216347	0.529411764705882	0.157894736842105	0.468546354076522	0.431820614746107	16	0.0419277712740927	HyperHigh	chr1	62208228	62228529	Intron1	+	INADL	protein_coding	chr1	62208667	62209230	1	0.0277326240086695	CpG: 89	chr1	62207827	62208818	chr1	62208667	62208818	chr1:62208815-62209373	chr1	62208815	62209373	chr1	62208815	62209230	chr1-62208265:62209295	chr1	62208265	62209295	chr1	62208667	62209230	chr1-62208981:62209221	chr1	62208981	62209221	chr1
chr1	62660384	62661656	0.359983031674208	0.0458184435135015	0.67948717948718	0.226495726495726	0.522038119818967	0.5	35	4.58016793111634e-06	HyperHigh	chr1	62659502	62660502	Promoter	+	L1TD1	protein_coding	chr1	62660384	62660502	0.0927672955974843	0.118	*	*	*	*	*	0	0	*	*	*	*	*	0	0	chr1-62660305:62660715	chr1	62660305	62660715	chr1	62660384	62660502	chr1-62660376:62660657	chr1	62660376	62660657	chr1
chr1	62660384	62661656	0.359983031674208	0.0458184435135015	0.67948717948718	0.226495726495726	0.522038119818967	0.5	35	4.58016793111634e-06	HyperHigh	chr1	62660503	62660593	FirstExon	+	L1TD1	protein_coding	chr1	62660503	62660593	0.0707547169811321	1	CpG: 37	chr1	62660555	62660946	chr1	62660555	62660593	*	*	*	*	*	0	0	chr1-62660305:62660715	chr1	62660305	62660715	chr1	62660503	62660593	chr1-62660565:62660661	chr1	62660565	62660661	chr1
chr1	62660384	62661656	0.359983031674208	0.0458184435135015	0.67948717948718	0.226495726495726	0.522038119818967	0.5	35	4.58016793111634e-06	HyperHigh	chr1	62660594	62662106	Intron1	+	L1TD1	protein_coding	chr1	62660594	62661656	0.834905660377358	0.702380952380952	CpG: 37	chr1	62660555	62660946	chr1	62660594	62660946	*	*	*	*	*	0	0	chr1-62661365:62661590	chr1	62661365	62661590	chr1	62661365	62661590	chr1-62661580:62662586	chr1	62661580	62662586	chr1
chr1	63539379	63540257	0.25	0.323650198151556	0.5	0.0769230769230769	0.653049305675748	0.257742782841639	30	7.54215318935375e-05	HyperHigh	*	*	*	InterGenic	*	*	*	*	*	*	*	*	*	*	*	*	*	0	0	*	*	*	*	*	0	0	chr1-63540045:63540250	chr1	63540045	63540250	chr1	63540045	63540250	chr1-63539723:63539950	chr1	63539723	63539950	chr1
chr1	63587625	63588555	0.375	-0.312886735890712	0.875	0.461538461538462	0.323650198151556	0.666666666666667	12	0.000231956420463292	HyperLow	*	*	*	InterGenic	*	*	*	*	*	*	*	*	*	*	*	*	*	0	0	*	*	*	*	*	0	0	chr1-63587820:63588150	chr1	63587820	63588150	chr1	63587820	63588150	chr1-63587867:63588030	chr1	63587867	63588030	chr1
chr1	64239236	64241497	0.117647058823529	0.240378703543446	0.157894736842105	0	0.402882983651022	0.130414521209752	56	3.26332917508038e-07	HypoHigh	chr1	64238713	64239713	Promoter	+	ROR1	protein_coding	chr1	64239236	64239713	0.210968597965502	0.477	CpG: 132	chr1	64239465	64240779	chr1	64239465	64239713	*	*	*	*	*	0	0	chr1-64239220:64239755	chr1	64239220	64239755	chr1	64239236	64239713	chr1-64239633:64240053	chr1	64239633	64240053	chr1
chr1	64239236	64241497	0.117647058823529	0.240378703543446	0.157894736842105	0	0.402882983651022	0.130414521209752	56	3.26332917508038e-07	HypoHigh	chr1	64239714	64240179	FirstExon	+	ROR1	protein_coding	chr1	64239714	64240179	0.205661211853162	1	CpG: 132	chr1	64239465	64240779	chr1	64239714	64240179	*	*	*	*	*	0	0	chr1-64239780:64241230	chr1	64239780	64241230	chr1	64239780	64240179	chr1-64239633:64240053	chr1	64239633	64240053	chr1
chr1	64239236	64241497	0.117647058823529	0.240378703543446	0.157894736842105	0	0.402882983651022	0.130414521209752	56	3.26332917508038e-07	HypoHigh	chr1	64240180	64474976	Intron1	+	ROR1	protein_coding	chr1	64240180	64241497	0.582485625829279	0.00560912451660165	CpG: 132	chr1	64239465	64240779	chr1	64240180	64240779	*	*	*	*	*	0	0	chr1-64241405:64241815	chr1	64241405	64241815	chr1	64241405	64241497	chr1-64241492:64241752	chr1	64241492	64241752	chr1
chr1	64461129	64463086	-0.246153846153846	0.256486993257858	0.642857142857143	0.923076923076923	0.453654682481227	0.382944951426972	14	0.0383059480491174	HypoHigh	chr1	64240180	64474976	Intron1	+	ROR1	protein_coding	chr1	64461129	64463086	1	0.00833489497265712	*	*	*	*	*	0	0	*	*	*	*	*	0	0	chr1-64462500:64462650	chr1	64462500	64462650	chr1	64462500	64462650	*	*	*	*	*
chr1	65742377	65746758	-0.111111111111111	0.204670635422163	0.8	0.916666666666667	0.385593216482346	0.197224259527442	30	0.0254118609622276	HypoHigh	chr1	65730616	65830317	Intron1	+	DNAJC6	protein_coding	chr1	65742377	65746758	1	0.0439413847403737	*	*	*	*	*	0	0	*	*	*	*	*	0	0	chr1-65745285:65745435	chr1	65745285	65745435	chr1	65745285	65745435	chr1-65746091:65746741	chr1	65746091	65746741	chr1
chr1	65742377	65746758	-0.111111111111111	0.204670635422163	0.8	0.916666666666667	0.385593216482346	0.197224259527442	30	0.0254118609622276	HypoHigh	chr1	65745139	65745561	LastExon	-	RP5-1044H5.1	antisense	chr1	65745139	65745561	0.096325039945218	1	*	*	*	*	*	0	0	*	*	*	*	*	0	0	chr1-65745285:65745435	chr1	65745285	65745435	chr1	65745285	65745435	chr1-65744861:65745337	chr1	65744861	65745337	chr1
chr1	65742377	65746758	-0.111111111111111	0.204670635422163	0.8	0.916666666666667	0.385593216482346	0.197224259527442	30	0.0254118609622276	HypoHigh	chr1	65745562	65772115	Intron1	-	RP5-1044H5.1	antisense	chr1	65745562	65746758	0.27299703264095	0.0450419914887207	*	*	*	*	*	0	0	*	*	*	*	*	0	0	*	*	*	*	*	0	0	chr1-65746091:65746741	chr1	65746091	65746741	chr1
chr1	65774480	65775803	0.20806277056277	0.352151853693473	0.314144736842106	0	0.578977078679759	0.182086479604106	35	6.25515754726843e-06	HyperHigh	chr1	65730616	65830317	Intron1	+	DNAJC6	protein_coding	chr1	65774480	65775803	1	0.0132696763322334	CpG: 67	chr1	65775018	65775746	chr1	65775018	65775746	*	*	*	*	*	0	0	chr1-65774885:65776055	chr1	65774885	65776055	chr1	65774885	65775803	chr1-65775801:65776205	chr1	65775801	65776205	chr1
chr1	65831660	65840581	-0.0492424242424241	0.204789815295586	0.916666666666667	0.944444444444444	0.346950694324252	0.216674140549451	48	0.0284320111971381	HypoHigh	chr1	65831618	65831730	Intron3	+	DNAJC6	protein_coding	chr1	65831660	65831730	0.00784665396256025	0.625	*	*	*	*	*	0	0	*	*	*	*	*	0	0	*	*	*	*	*	0	0	*	*	*	*	*
chr1	65831660	65840581	-0.0492424242424241	0.204789815295586	0.916666666666667	0.944444444444444	0.346950694324252	0.216674140549451	48	0.0284320111971381	HypoHigh	chr1	65831731	65831879	Exon4	+	DNAJC6	protein_coding	chr1	65831731	65831879	0.0165900683779845	1	*	*	*	*	*	0	0	*	*	*	*	*	0	0	*	*	*	*	*	0	0	*	*	*	*	*
chr1	65831660	65840581	-0.0492424242424241	0.204789815295586	0.916666666666667	0.944444444444444	0.346950694324252	0.216674140549451	48	0.0284320111971381	HypoHigh	chr1	65831880	65845084	Intron4	+	DNAJC6	protein_coding	chr1	65831880	65840581	0.975339087546239	0.65896697970312	*	*	*	*	*	0	0	*	*	*	*	*	0	0	chr1-65838220:65838570	chr1	65838220	65838570	chr1	65838220	65838570	chr1-65838622:65839066	chr1	65838622	65839066	chr1
chr1	65990765	65991832	0.333333333333333	0.410003910950477	0.333333333333333	0.0454545454545455	0.630353704024218	0.167752778258549	30	4.89661880285938e-07	HyperHigh	chr1	65891062	66031228	Intron2	+	LEPR	protein_coding	chr1	65990765	65991832	1	0.00761240243711028	CpG: 88	chr1	65991001	65991811	chr1	65991001	65991811	*	*	*	*	*	0	0	chr1-65990720:65991795	chr1	65990720	65991795	chr1	65990765	65991795	chr1-65991820:65992356	chr1	65991820	65992356	chr1
chr1	66207462	66210207	0.083342972816657	-0.296886201573883	1	0.88562091503268	0	0.426527144132135	19	0.000727955407251956	HypoLow	*	*	*	InterGenic	*	*	*	*	*	*	*	*	*	*	*	*	*	0	0	*	*	*	*	*	0	0	*	*	*	*	*	0	0	chr1-66207722:66208132	chr1	66207722	66208132	chr1
chr1	66257906	66259703	0.40625	0.327637092594541	0.6	0.0588235294117647	0.625917964135791	0.283367273423746	51	1.73170748396208e-13	HyperHigh	chr1	66257196	66258196	Promoter	+	PDE4B	protein_coding	chr1	66257906	66258196	0.161380077907624	0.29	*	*	*	*	*	0	0	*	*	*	*	*	0	0	chr1-66257840:66259015	chr1	66257840	66259015	chr1	66257906	66258196	chr1-66258143:66259366	chr1	66258143	66259366	chr1
chr1	66257906	66259703	0.40625	0.327637092594541	0.6	0.0588235294117647	0.625917964135791	0.283367273423746	51	1.73170748396208e-13	HyperHigh	chr1	66258197	66258313	FirstExon	+	PDE4B	protein_coding	chr1	66258197	66258313	0.0645520311630495	1	*	*	*	*	*	0	0	*	*	*	*	*	0	0	chr1-66257840:66259015	chr1	66257840	66259015	chr1	66258197	66258313	chr1-66258143:66259366	chr1	66258143	66259366	chr1
chr1	66257906	66259703	0.40625	0.327637092594541	0.6	0.0588235294117647	0.625917964135791	0.283367273423746	51	1.73170748396208e-13	HyperHigh	chr1	66258314	66378927	Intron1	+	PDE4B	protein_coding	chr1	66258314	66259703	0.772954924874791	0.0115161715569632	CpG: 54	chr1	66258440	66258918	chr1	66258440	66258918	*	*	*	*	*	0	0	chr1-66259580:66259815	chr1	66259580	66259815	chr1	66259580	66259703	chr1-66259017:66259373	chr1	66259017	66259373	chr1
chr1	67600390	67600771	0.571428571428571	0.176567024166821	0.6	0.0769230769230769	0.486382639009082	0.353759374819711	12	0.000231009955099917	HyperHigh	chr1	67596911	67697528	Intron1	-	C1orf141	protein_coding	chr1	67600390	67600771	1	0.00378663645308447	CpG: 27	chr1	67600390	67600715	chr1	67600390	67600715	*	*	*	*	*	0	0	chr1-67600520:67600795	chr1	67600520	67600795	chr1	67600520	67600771	chr1-67600470:67600940	chr1	67600470	67600940	chr1
chr1	67806354	67815303	0.0267379679144379	-0.240642698295787	1	0.904761904761905	0	0.365265085000311	52	0.0102986656863845	HypoLow	chr1	67804387	67816552	Intron8	+	IL12RB2	protein_coding	chr1	67806354	67815303	1	0.735635018495684	*	*	*	*	*	0	0	*	*	*	*	*	0	0	chr1-67814605:67814855	chr1	67814605	67814855	chr1	67814605	67814855	chr1-67814119:67814312	chr1	67814119	67814312	chr1
chr1	68517142	68517537	0.268807118807119	0.265393847862509	0.41958041958042	0.157738095238095	0.727419592336787	0.334201688321009	13	0.00293325406129641	HyperHigh	chr1	68500447	68537482	Intron2	+	GNG12-AS1	antisense	chr1	68517142	68517537	1	0.0106655866072634	CpG: 22	chr1	68517254	68517474	chr1	68517254	68517474	*	*	*	*	*	0	0	chr1-68517145:68517550	chr1	68517145	68517550	chr1	68517145	68517537	chr1-68517246:68517603	chr1	68517246	68517603	chr1
chr1	68517142	68517537	0.268807118807119	0.265393847862509	0.41958041958042	0.157738095238095	0.727419592336787	0.334201688321009	13	0.00293325406129641	HyperHigh	chr1	68517108	68517314	FirstExon	-	DIRAS3	protein_coding	chr1	68517142	68517314	0.435443037974684	0.83495145631068	CpG: 22	chr1	68517254	68517474	chr1	68517254	68517314	*	*	*	*	*	0	0	chr1-68517145:68517550	chr1	68517145	68517550	chr1	68517145	68517314	chr1-68517246:68517603	chr1	68517246	68517603	chr1
chr1	68517142	68517537	0.268807118807119	0.265393847862509	0.41958041958042	0.157738095238095	0.727419592336787	0.334201688321009	13	0.00293325406129641	HyperHigh	chr1	68517315	68518315	Promoter	-	DIRAS3	protein_coding	chr1	68517315	68517537	0.562025316455696	0.222	CpG: 22	chr1	68517254	68517474	chr1	68517315	68517474	*	*	*	*	*	0	0	chr1-68517145:68517550	chr1	68517145	68517550	chr1	68517315	68517537	chr1-68517246:68517603	chr1	68517246	68517603	chr1
chr1	68694782	68699785	0.125	0.261562822591632	0.25	0	0.432931646898466	0.167752778258549	82	4.46517876540475e-06	HypoHigh	chr1	68659905	68697876	Intron1	-	WLS	protein_coding	chr1	68694782	68697876	0.618428942634419	0.0814832372073424	CpG: 80	chr1	68696639	68697628	chr1	68696639	68697628	*	*	*	*	*	0	0	chr1-68696780:68697890	chr1	68696780	68697890	chr1	68696780	68697876	chr1-68697872:68698222	chr1	68697872	68698222	chr1
chr1	68694782	68699785	0.125	0.261562822591632	0.25	0	0.432931646898466	0.167752778258549	82	4.46517876540475e-06	HypoHigh	chr1	68697877	68698228	FirstExon	-	WLS	protein_coding	chr1	68697877	68698228	0.0701579052568459	1	*	*	*	*	*	0	0	*	*	*	*	*	0	0	chr1-68698005:68698370	chr1	68698005	68698370	chr1	68698005	68698228	chr1-68698145:68698365	chr1	68698145	68698365	chr1
chr1	68694782	68699785	0.125	0.261562822591632	0.25	0	0.432931646898466	0.167752778258549	82	4.46517876540475e-06	HypoHigh	chr1	68698229	68699229	Promoter	-	WLS	protein_coding	chr1	68698229	68699229	0.199880071956826	1	*	*	*	*	*	0	0	*	*	*	*	*	0	0	chr1-68698925:68699130	chr1	68698925	68699130	chr1	68698925	68699130	chr1-68698938:68699194	chr1	68698938	68699194	chr1
chr1	69135105	69139611	-0.076923076923077	0.286432651257962	0.818181818181818	0.928571428571429	0.482205555876069	0.197224259527442	20	0.0102393981596544	HypoHigh	*	*	*	InterGenic	*	*	*	*	*	*	*	*	*	*	*	*	*	0	0	*	*	*	*	*	0	0	chr1-69139460:69139770	chr1	69139460	69139770	chr1	69139460	69139611	chr1-69139566:69139822	chr1	69139566	69139822	chr1
chr1	69982078	69984507	-0.0588235294117651	0.272229696105007	0.904761904761905	0.954545454545455	0.363076692947528	0.146498995640504	24	0.00361847783575685	HypoHigh	*	*	*	InterGenic	*	*	*	*	*	*	*	*	*	*	*	*	*	0	0	*	*	*	*	*	0	0	*	*	*	*	*	0	0	chr1-69982967:69983347	chr1	69982967	69983347	chr1
chr1	72124063	72129677	0.0939153439153435	-0.251544106612077	1	0.866071428571428	0	0.364024066209113	35	0.000157593246610204	HypoLow	chr1	72076830	72163690	Intron4	-	NEGR1	protein_coding	chr1	72124063	72129677	1	0.0646327423440018	*	*	*	*	*	0	0	*	*	*	*	*	0	0	chr1-72126180:72126430	chr1	72126180	72126430	chr1	72126180	72126430	chr1-72124103:72124306	chr1	72124103	72124306	chr1
chr1	72219037	72236987	0.055555555555556	-0.24484330714649	1	0.906926406926407	0	0.330744798141431	79	2.13819146544265e-06	HypoLow	chr1	72163823	72241854	Intron3	-	NEGR1	protein_coding	chr1	72219037	72236987	1	0.230036780254002	*	*	*	*	*	0	0	*	*	*	*	*	0	0	chr1-72235865:72236195	chr1	72235865	72236195	chr1	72235865	72236195	chr1-72230483:72230707	chr1	72230483	72230707	chr1
chr1	72556098	72564280	0.105555555555556	-0.280910590127537	1	0.888888888888889	0	0.396862349142171	35	0.00674744656385551	HypoLow	chr1	72400995	72748001	Intron1	-	NEGR1	protein_coding	chr1	72556098	72564280	1	0.0235788430171236	*	*	*	*	*	0	0	*	*	*	*	*	0	0	chr1-72563900:72564210	chr1	72563900	72564210	chr1	72563900	72564210	chr1-72563659:72563859	chr1	72563659	72563859	chr1
chr1	75138807	75139854	0.278143274853801	0.40975800793255	0.435314685314686	0.0645833333333334	0.640642698295787	0.271648529716584	31	1.83385471301017e-06	HyperHigh	chr1	75115000	75139180	Intron1	-	C1orf173	protein_coding	chr1	75138807	75139180	0.356255969436485	0.0154259718775848	*	*	*	*	*	0	0	*	*	*	*	*	0	0	chr1-75138885:75139235	chr1	75138885	75139235	chr1	75138885	75139180	chr1-75139111:75139882	chr1	75139111	75139882	chr1
chr1	75138807	75139854	0.278143274853801	0.40975800793255	0.435314685314686	0.0645833333333334	0.640642698295787	0.271648529716584	31	1.83385471301017e-06	HyperHigh	chr1	75139181	75139422	FirstExon	-	C1orf173	protein_coding	chr1	75139181	75139422	0.23018147086915	1	*	*	*	*	*	0	0	*	*	*	*	*	0	0	chr1-75139285:75139975	chr1	75139285	75139975	chr1	75139285	75139422	chr1-75139111:75139882	chr1	75139111	75139882	chr1
chr1	75138807	75139854	0.278143274853801	0.40975800793255	0.435314685314686	0.0645833333333334	0.640642698295787	0.271648529716584	31	1.83385471301017e-06	HyperHigh	chr1	75139423	75140423	Promoter	-	C1orf173	protein_coding	chr1	75139423	75139854	0.411652340019102	0.431	*	*	*	*	*	0	0	*	*	*	*	*	0	0	chr1-75139285:75139975	chr1	75139285	75139975	chr1	75139423	75139854	chr1-75139597:75139901	chr1	75139597	75139901	chr1
chr1	75522180	75525358	0.240384615384616	-0.144513489016125	0.83974358974359	0.599358974358974	0.328409378678084	0.502690315725642	13	0.0221371333386101	HyperLow	*	*	*	InterGenic	*	*	*	*	*	*	*	*	*	*	*	*	*	0	0	*	*	*	*	*	0	0	chr1-75524180:75524350	chr1	75524180	75524350	chr1	75524180	75524350	chr1-75524110:75524510	chr1	75524110	75524510	chr1
chr1	75590141	75602924	0.166221033868093	0.216340833189103	0.333333333333333	0.1	0.508736858607474	0.306703988156976	269	4.50050221396823e-19	HypoHigh	chr1	75589613	75590613	Promoter	-	RP11-510C10.4	lincRNA	chr1	75590141	75590613	0.0369240397402801	0.472	*	*	*	*	*	0	0	*	*	*	*	*	0	0	chr1-75590565:75590815	chr1	75590565	75590815	chr1	75590565	75590613	chr1-75590362:75590567	chr1	75590362	75590567	chr1
chr1	75590141	75602924	0.166221033868093	0.216340833189103	0.333333333333333	0.1	0.508736858607474	0.306703988156976	269	4.50050221396823e-19	HypoHigh	chr1	75593515	75593938	LastExon	-	RP11-510C10.2	antisense	chr1	75593515	75593938	0.0330908237502934	1	*	*	*	*	*	0	0	*	*	*	*	*	0	0	chr1-75593725:75594355	chr1	75593725	75594355	chr1	75593725	75593938	chr1-75593841:75594285	chr1	75593841	75594285	chr1
chr1	75590141	75602924	0.166221033868093	0.216340833189103	0.333333333333333	0.1	0.508736858607474	0.306703988156976	269	4.50050221396823e-19	HypoHigh	chr1	75593939	75598497	Intron1	-	RP11-510C10.2	antisense	chr1	75593939	75598497	0.356567315966518	1	CpG: 19	chr1	75596723	75596947	chr1	75596723	75596947	*	*	*	*	*	0	0	chr1-75598485:75598655	chr1	75598485	75598655	chr1	75598485	75598497	chr1-75598410:75599286	chr1	75598410	75599286	chr1
chr1	75590141	75602924	0.166221033868093	0.216340833189103	0.333333333333333	0.1	0.508736858607474	0.306703988156976	269	4.50050221396823e-19	HypoHigh	chr1	75598498	75598743	FirstExon	-	RP11-510C10.2	antisense	chr1	75598498	75598743	0.0191660799499335	1	*	*	*	*	*	0	0	*	*	*	*	*	0	0	chr1-75598740:75599135	chr1	75598740	75599135	chr1	75598740	75598743	chr1-75598612:75599108	chr1	75598612	75599108	chr1
chr1	75590141	75602924	0.166221033868093	0.216340833189103	0.333333333333333	0.1	0.508736858607474	0.306703988156976	269	4.50050221396823e-19	HypoHigh	chr1	75598744	75599744	Promoter	-	RP11-510C10.2	antisense	chr1	75598744	75599744	0.0782288977548306	1	*	*	*	*	*	0	0	*	*	*	*	*	0	0	chr1-75599420:75599890	chr1	75599420	75599890	chr1	75599420	75599744	chr1-75599563:75600239	chr1	75599563	75600239	chr1
chr1	75590141	75602924	0.166221033868093	0.216340833189103	0.333333333333333	0.1	0.508736858607474	0.306703988156976	269	4.50050221396823e-19	HypoHigh	chr1	75593118	75594118	Promoter	+	LHX8	protein_coding	chr1	75593118	75594118	0.0782288977548306	1	*	*	*	*	*	0	0	*	*	*	*	*	0	0	chr1-75593725:75594355	chr1	75593725	75594355	chr1	75593725	75594118	chr1-75593938:75594178	chr1	75593938	75594178	chr1
chr1	75590141	75602924	0.166221033868093	0.216340833189103	0.333333333333333	0.1	0.508736858607474	0.306703988156976	269	4.50050221396823e-19	HypoHigh	chr1	75594119	75594293	FirstExon	+	LHX8	protein_coding	chr1	75594119	75594293	0.0136118282093405	1	*	*	*	*	*	0	0	*	*	*	*	*	0	0	chr1-75593725:75594355	chr1	75593725	75594355	chr1	75594119	75594293	chr1-75593938:75594178	chr1	75593938	75594178	chr1
chr1	75590141	75602924	0.166221033868093	0.216340833189103	0.333333333333333	0.1	0.508736858607474	0.306703988156976	269	4.50050221396823e-19	HypoHigh	chr1	75594294	75595910	Intron1	+	LHX8	protein_coding	chr1	75594294	75595910	0.126417898771806	1	CpG: 28	chr1	75595813	75596162	chr1	75595813	75595910	*	*	*	*	*	0	0	chr1-75595900:75596215	chr1	75595900	75596215	chr1	75595900	75595910	chr1-75595566:75596390	chr1	75595566	75596390	chr1
chr1	75590141	75602924	0.166221033868093	0.216340833189103	0.333333333333333	0.1	0.508736858607474	0.306703988156976	269	4.50050221396823e-19	HypoHigh	chr1	75595911	75596417	Exon2	+	LHX8	protein_coding	chr1	75595911	75596417	0.0395838222639443	1	CpG: 28	chr1	75595813	75596162	chr1	75595911	75596162	*	*	*	*	*	0	0	chr1-75596305:75596455	chr1	75596305	75596455	chr1	75596305	75596417	chr1-75596081:75596851	chr1	75596081	75596851	chr1
chr1	75590141	75602924	0.166221033868093	0.216340833189103	0.333333333333333	0.1	0.508736858607474	0.306703988156976	269	4.50050221396823e-19	HypoHigh	chr1	75596418	75602287	Intron2	+	LHX8	protein_coding	chr1	75596418	75602287	0.459125400923101	1	CpG: 81	chr1	75601998	75602878	chr1	75601998	75602287	*	*	*	*	*	0	0	chr1-75602225:75602435	chr1	75602225	75602435	chr1	75602225	75602287	chr1-75602285:75602595	chr1	75602285	75602595	chr1
chr1	75590141	75602924	0.166221033868093	0.216340833189103	0.333333333333333	0.1	0.508736858607474	0.306703988156976	269	4.50050221396823e-19	HypoHigh	chr1	75602288	75602374	Exon3	+	LHX8	protein_coding	chr1	75602288	75602374	0.00672768520691543	1	CpG: 81	chr1	75601998	75602878	chr1	75602288	75602374	*	*	*	*	*	0	0	chr1-75602225:75602435	chr1	75602225	75602435	chr1	75602288	75602374	chr1-75602285:75602595	chr1	75602285	75602595	chr1
chr1	75590141	75602924	0.166221033868093	0.216340833189103	0.333333333333333	0.1	0.508736858607474	0.306703988156976	269	4.50050221396823e-19	HypoHigh	chr1	75602375	75602784	Intron3	+	LHX8	protein_coding	chr1	75602375	75602784	0.0319956191817257	1	CpG: 81	chr1	75601998	75602878	chr1	75602375	75602784	*	*	*	*	*	0	0	chr1-75602745:75602970	chr1	75602745	75602970	chr1	75602745	75602784	chr1-75602766:75603136	chr1	75602766	75603136	chr1
chr1	75590141	75602924	0.166221033868093	0.216340833189103	0.333333333333333	0.1	0.508736858607474	0.306703988156976	269	4.50050221396823e-19	HypoHigh	chr1	75602785	75602946	Exon4	+	LHX8	protein_coding	chr1	75602785	75602924	0.0108738167879215	0.863354037267081	CpG: 81	chr1	75601998	75602878	chr1	75602785	75602878	*	*	*	*	*	0	0	chr1-75602745:75602970	chr1	75602745	75602970	chr1	75602785	75602924	chr1-75602766:75603136	chr1	75602766	75603136	chr1
chr1	75590141	75602924	0.166221033868093	0.216340833189103	0.333333333333333	0.1	0.508736858607474	0.306703988156976	269	4.50050221396823e-19	HypoHigh	chr1	75595659	75597638	LastExon	-	RP11-510C10.3	antisense	chr1	75595659	75597638	0.15481498865681	1	CpG: 19	chr1	75596723	75596947	chr1	75596723	75596947	*	*	*	*	*	0	0	chr1-75597185:75597835	chr1	75597185	75597835	chr1	75597185	75597638	chr1-75597163:75599191	chr1	75597163	75599191	chr1
chr1	75590141	75602924	0.166221033868093	0.216340833189103	0.333333333333333	0.1	0.508736858607474	0.306703988156976	269	4.50050221396823e-19	HypoHigh	chr1	75597639	75598038	Intron1	-	RP11-510C10.3	antisense	chr1	75597639	75598038	0.0312133302041774	1	*	*	*	*	*	0	0	*	*	*	*	*	0	0	chr1-75597905:75598450	chr1	75597905	75598450	chr1	75597905	75598038	chr1-75597163:75599191	chr1	75597163	75599191	chr1
chr1	75590141	75602924	0.166221033868093	0.216340833189103	0.333333333333333	0.1	0.508736858607474	0.306703988156976	269	4.50050221396823e-19	HypoHigh	chr1	75598039	75598261	FirstExon	-	RP11-510C10.3	antisense	chr1	75598039	75598261	0.0173668153015724	1	*	*	*	*	*	0	0	*	*	*	*	*	0	0	chr1-75597905:75598450	chr1	75597905	75598450	chr1	75598039	75598261	chr1-75598081:75598861	chr1	75598081	75598861	chr1
chr1	75590141	75602924	0.166221033868093	0.216340833189103	0.333333333333333	0.1	0.508736858607474	0.306703988156976	269	4.50050221396823e-19	HypoHigh	chr1	75598262	75599262	Promoter	-	RP11-510C10.3	antisense	chr1	75598262	75599262	0.0782288977548306	1	*	*	*	*	*	0	0	*	*	*	*	*	0	0	chr1-75599205:75599355	chr1	75599205	75599355	chr1	75599205	75599262	chr1-75599156:75599860	chr1	75599156	75599860	chr1
chr1	76079969	76081030	0.215384615384616	0.298884218634907	0.289915966386555	0.0476190476190476	0.511420276530383	0.205313201990466	25	0.000570464512213994	HyperHigh	*	*	*	InterGenic	*	*	*	*	*	*	*	*	CpG: 34	chr1	76080454	76080808	chr1	76080454	76080808	chr1:76080988-76081082	chr1	76080988	76081082	chr1	76080988	76081030	chr1-76080420:76081075	chr1	76080420	76081075	chr1	76080420	76081030	chr1-76080875:76081199	chr1	76080875	76081199	chr1
chr1	76081979	76083043	0.221139971139971	0.250005938270972	0.272727272727273	0.0515873015873016	0.555827083453526	0.275753207959268	23	0.000112376152302228	HyperHigh	*	*	*	InterGenic	*	*	*	*	*	*	*	*	CpG: 72	chr1	76081378	76082365	chr1	76081979	76082365	*	*	*	*	*	0	0	chr1-76082840:76083055	chr1	76082840	76083055	chr1	76082840	76083043	chr1-76082847:76082961	chr1	76082847	76082961	chr1
chr1	76191390	76191889	-0.373205741626794	-0.306803642065105	0.1875	0.684210526315789	0.328409378678084	0.666666666666667	12	0.0137728657942972	HypoLow	chr1	76190503	76194085	Intron1	+	ACADM	protein_coding	chr1	76191390	76191889	1	0.139307649357901	*	*	*	*	*	0	0	*	*	*	*	*	0	0	chr1-76191500:76191910	chr1	76191500	76191910	chr1	76191500	76191889	chr1-76191880:76192791	chr1	76191880	76192791	chr1
chr1	76538328	76539478	-0.202516233766234	0.275795383751691	0.79144385026738	1	0.5583288460713	0.0905940738665995	13	0.0138525143336527	HypoHigh	chr1	76539403	76540403	Promoter	+	ST6GALNAC3	protein_coding	chr1	76539403	76539478	0.0652173913043478	0.075	*	*	*	*	*	0	0	*	*	*	*	*	0	0	chr1-76539205:76539495	chr1	76539205	76539495	chr1	76539403	76539478	chr1-76539277:76539533	chr1	76539277	76539533	chr1
chr1	77063714	77067421	-0.05	0.223344853609959	0.933333333333333	1	0.326622918883718	0	26	0.0106569107158112	HypoHigh	chr1	76878103	77093136	Intron3	+	ST6GALNAC3	protein_coding	chr1	77063714	77067421	1	0.0172392144461548	*	*	*	*	*	0	0	*	*	*	*	*	0	0	chr1-77067140:77067290	chr1	77067140	77067290	chr1	77067140	77067290	*	*	*	*	*
chr1	77230550	77230958	0.254960317460317	-0.0861381644994445	0.668730650154799	0.418831168831169	0.511420567045827	0.593711321041349	13	0.000121677147658836	HyperHigh	chr1	77224090	77244674	Intron1	-	RP11-415A20.1	lincRNA	chr1	77230550	77230958	1	0.0198212203653323	*	*	*	*	*	0	0	chr1:77230839-77231032	chr1	77230839	77231032	chr1	77230839	77230958	chr1-77230740:77231070	chr1	77230740	77231070	chr1	77230740	77230958	chr1-77230722:77230972	chr1	77230722	77230972	chr1
chr1	77332812	77335854	0.0666666666666667	0.208933220470551	0.125	0	0.385593216482346	0.167752778258549	70	1.96120140704887e-05	HypoHigh	chr1	77332125	77333125	Promoter	+	ST6GALNAC5	protein_coding	chr1	77332812	77333125	0.102892833662064	0.313	CpG: 112	chr1	77333111	77334534	chr1	77333111	77333125	*	*	*	*	*	0	0	chr1-77333000:77333835	chr1	77333000	77333835	chr1	77333000	77333125	chr1-77333103:77333667	chr1	77333103	77333667	chr1
chr1	77332812	77335854	0.0666666666666667	0.208933220470551	0.125	0	0.385593216482346	0.167752778258549	70	1.96120140704887e-05	HypoHigh	chr1	77333126	77333375	FirstExon	+	ST6GALNAC5	protein_coding	chr1	77333126	77333375	0.0818540433925049	1	CpG: 112	chr1	77333111	77334534	chr1	77333126	77333375	*	*	*	*	*	0	0	chr1-77333000:77333835	chr1	77333000	77333835	chr1	77333126	77333375	chr1-77333200:77333844	chr1	77333200	77333844	chr1
chr1	77332812	77335854	0.0666666666666667	0.208933220470551	0.125	0	0.385593216482346	0.167752778258549	70	1.96120140704887e-05	HypoHigh	chr1	77333376	77334181	Intron1	+	ST6GALNAC5	protein_coding	chr1	77333376	77334181	0.264628533859303	1	CpG: 112	chr1	77333111	77334534	chr1	77333376	77334181	*	*	*	*	*	0	0	chr1-77333860:77334550	chr1	77333860	77334550	chr1	77333860	77334181	chr1-77334164:77334548	chr1	77334164	77334548	chr1
chr1	77332812	77335854	0.0666666666666667	0.208933220470551	0.125	0	0.385593216482346	0.167752778258549	70	1.96120140704887e-05	HypoHigh	chr1	77334182	77334427	Exon2	+	ST6GALNAC5	protein_coding	chr1	77334182	77334427	0.0805391190006575	1	CpG: 112	chr1	77333111	77334534	chr1	77334182	77334427	*	*	*	*	*	0	0	chr1-77333860:77334550	chr1	77333860	77334550	chr1	77334182	77334427	chr1-77334198:77334531	chr1	77334198	77334531	chr1
chr1	77332812	77335854	0.0666666666666667	0.208933220470551	0.125	0	0.385593216482346	0.167752778258549	70	1.96120140704887e-05	HypoHigh	chr1	77334428	77509888	Intron2	+	ST6GALNAC5	protein_coding	chr1	77334428	77335854	0.468770545693623	0.00812720848056537	CpG: 112	chr1	77333111	77334534	chr1	77334428	77334534	*	*	*	*	*	0	0	chr1-77335820:77336030	chr1	77335820	77336030	chr1	77335820	77335854	chr1-77335818:77335947	chr1	77335818	77335947	chr1
chr1	78442455	78443101	-0.268382352941176	-0.231178712965398	0.15	0.5	0.486382639009082	0.706026069783237	14	0.00146707383564977	HypoLow	chr1	78435700	78444568	Intron1	-	FUBP1	protein_coding	chr1	78442455	78443101	1	0.0728461885430762	*	*	*	*	*	0	0	*	*	*	*	*	0	0	chr1-78442880:78443390	chr1	78442880	78443390	chr1	78442880	78443101	chr1-78443023:78443227	chr1	78443023	78443227	chr1
chr1	78956267	78957610	0.159090909090909	0.366527076882021	0.3	0.0588235294117647	0.628057641512649	0.216674140549451	38	3.98263182816805e-06	HypoHigh	chr1	78864711	78958356	Intron2	+	PTGFR	protein_coding	chr1	78956267	78957610	1	0.0143413956965134	CpG: 70	chr1	78956624	78957516	chr1	78956624	78957516	chr1:78957462-78957762	chr1	78957462	78957762	chr1	78957462	78957610	chr1-78956345:78957775	chr1	78956345	78957775	chr1	78956345	78957610	chr1-78957528:78957820	chr1	78957528	78957820	chr1
chr1	79387674	79396229	-0.00416666666666698	0.209975859771062	0.894736842105263	0.9	0.452259883149013	0.281783645540812	32	0.295015959958917	HypoHigh	chr1	79387472	79392570	Intron8	-	ELTD1	protein_coding	chr1	79387674	79392570	0.57229690239626	0.960376618281679	*	*	*	*	*	0	0	*	*	*	*	*	0	0	*	*	*	*	*	0	0	*	*	*	*	*
chr1	79387674	79396229	-0.00416666666666698	0.209975859771062	0.894736842105263	0.9	0.452259883149013	0.281783645540812	32	0.295015959958917	HypoHigh	chr1	79392571	79392776	Exon8	-	ELTD1	protein_coding	chr1	79392571	79392776	0.0239625949736996	1	*	*	*	*	*	0	0	*	*	*	*	*	0	0	*	*	*	*	*	0	0	*	*	*	*	*
chr1	79387674	79396229	-0.00416666666666698	0.209975859771062	0.894736842105263	0.9	0.452259883149013	0.281783645540812	32	0.295015959958917	HypoHigh	chr1	79392777	79401979	Intron7	-	ELTD1	protein_coding	chr1	79392777	79396229	0.403506721215663	0.375135840034775	*	*	*	*	*	0	0	*	*	*	*	*	0	0	*	*	*	*	*	0	0	*	*	*	*	*
chr1	79472281	79472557	0.374125874125874	-0.224298442510043	0.857142857142857	0.331578947368421	0.382188323328556	0.622916742790611	11	0.015447867546676	HyperLow	chr1	79470905	79472317	Intron1	-	ELTD1	protein_coding	chr1	79472281	79472317	0.130434782608696	0.0254957507082153	CpG: 33	chr1	79472281	79472537	chr1	79472281	79472317	*	*	*	*	*	0	0	chr1-79472225:79472755	chr1	79472225	79472755	chr1	79472281	79472317	chr1-79472294:79472534	chr1	79472294	79472534	chr1
chr1	79472281	79472557	0.374125874125874	-0.224298442510043	0.857142857142857	0.331578947368421	0.382188323328556	0.622916742790611	11	0.015447867546676	HyperLow	chr1	79472318	79472403	FirstExon	-	ELTD1	protein_coding	chr1	79472318	79472403	0.307971014492754	1	CpG: 33	chr1	79472281	79472537	chr1	79472318	79472403	*	*	*	*	*	0	0	chr1-79472225:79472755	chr1	79472225	79472755	chr1	79472318	79472403	chr1-79472395:79472553	chr1	79472395	79472553	chr1
chr1	79472281	79472557	0.374125874125874	-0.224298442510043	0.857142857142857	0.331578947368421	0.382188323328556	0.622916742790611	11	0.015447867546676	HyperLow	chr1	79472404	79473404	Promoter	-	ELTD1	protein_coding	chr1	79472404	79472557	0.554347826086957	0.153	CpG: 33	chr1	79472281	79472537	chr1	79472404	79472537	*	*	*	*	*	0	0	chr1-79472225:79472755	chr1	79472225	79472755	chr1	79472404	79472557	chr1-79472395:79472553	chr1	79472395	79472553	chr1
chr1	80782258	80787696	0.055555555555556	-0.253224156665178	1	0.909090909090909	0	0.417209722462608	34	0.00801154935769443	HypoLow	*	*	*	InterGenic	*	*	*	*	*	*	*	*	*	*	*	*	*	0	0	*	*	*	*	*	0	0	chr1-80784620:80784770	chr1	80784620	80784770	chr1	80784620	80784770	chr1-80784417:80784933	chr1	80784417	80784933	chr1
chr1	81928096	81929989	0.188888888888889	-0.259295254680692	0.939338235294118	0.69047619047619	0.395933101860885	0.45698353148489	17	0.08023743051429	HypoLow	chr1	81910775	82046560	Intron2	+	LPHN2	protein_coding	chr1	81928096	81929989	1	0.0139411569761019	*	*	*	*	*	0	0	*	*	*	*	*	0	0	*	*	*	*	*	0	0	chr1-81929662:81929910	chr1	81929662	81929910	chr1
chr1	81982922	81984029	0.288888888888889	0.193087156820026	0.4	0.15	0.597493750120193	0.353759374819711	14	0.0182658224578824	HyperHigh	chr1	81910775	82046560	Intron2	+	LPHN2	protein_coding	chr1	81982922	81984029	1	0.00815259417461428	*	*	*	*	*	0	0	*	*	*	*	*	0	0	chr1-81983780:81983990	chr1	81983780	81983990	chr1	81983780	81983990	*	*	*	*	*
chr1	81982922	81984029	0.288888888888889	0.193087156820026	0.4	0.15	0.597493750120193	0.353759374819711	14	0.0182658224578824	HyperHigh	chr1	81980881	82023348	Intron1	-	RP5-837I24.2	antisense	chr1	81982922	81984029	1	0.0260672993147621	*	*	*	*	*	0	0	*	*	*	*	*	0	0	chr1-81983780:81983990	chr1	81983780	81983990	chr1	81983780	81983990	*	*	*	*	*
chr1	82626408	82628126	0.204166666666667	0.074038580057918	0.692307692307692	0.0666666666666667	0.5	0.287706856188877	18	0.0470025077960858	HyperHigh	*	*	*	InterGenic	*	*	*	*	*	*	*	*	*	*	*	*	*	0	0	*	*	*	*	*	0	0	chr1-82627340:82627810	chr1	82627340	82627810	chr1	82627340	82627810	chr1-82627531:82628131	chr1	82627531	82628131	chr1
chr1	83137728	83142797	0.083916083916084	-0.228325112062271	1	0.84412955465587	0.228658419422619	0.458289014656807	21	0.000813363628525277	HypoLow	*	*	*	InterGenic	*	*	*	*	*	*	*	*	*	*	*	*	*	0	0	*	*	*	*	*	0	0	chr1-83140305:83140455	chr1	83140305	83140455	chr1	83140305	83140455	chr1-83138318:83138602	chr1	83138318	83138602	chr1
chr1	85189110	85190386	0.257352941176471	-0.277480876538811	0.966666666666667	0.625	0.20460047980644	0.582744299750679	17	0.0256118084657989	HyperLow	*	*	*	InterGenic	*	*	*	*	*	*	*	*	*	*	*	*	*	0	0	*	*	*	*	*	0	0	chr1-85190100:85190415	chr1	85190100	85190415	chr1	85190100	85190386	chr1-85190338:85190614	chr1	85190338	85190614	chr1
chr1	85358359	85359325	0.111111111111111	0.315457645328481	0.125	0	0.417209722462608	0	36	2.87571754169172e-07	HypoHigh	*	*	*	InterGenic	*	*	*	*	*	*	*	*	CpG: 89	chr1	85358359	85359187	chr1	85358359	85359187	*	*	*	*	*	0	0	chr1-85358060:85359375	chr1	85358060	85359375	chr1	85358359	85359325	chr1-85359290:85359726	chr1	85359290	85359726	chr1
chr1	85462952	85464475	0.0714285714285714	0.257742782841639	0.0769230769230769	0.0476190476190476	0.358139142380152	0.112430022205671	53	0.000373948260460004	HypoHigh	chr1	85462624	85463624	Promoter	-	MCOLN2	protein_coding	chr1	85462952	85463624	0.44123440577807	0.672	CpG: 89	chr1	85462585	85463435	chr1	85462952	85463435	*	*	*	*	*	0	0	chr1-85463445:85464335	chr1	85463445	85464335	chr1	85463445	85463624	chr1-85463549:85463913	chr1	85463549	85463913	chr1
chr1	85462952	85464475	0.0714285714285714	0.257742782841639	0.0769230769230769	0.0476190476190476	0.358139142380152	0.112430022205671	53	0.000373948260460004	HypoHigh	chr1	85463829	85464829	Promoter	+	WDR63	protein_coding	chr1	85463829	85464475	0.424162836506894	0.646	CpG: 32	chr1	85463884	85464167	chr1	85463884	85464167	*	*	*	*	*	0	0	chr1-85463445:85464335	chr1	85463445	85464335	chr1	85463829	85464335	chr1-85464453:85464897	chr1	85464453	85464897	chr1
chr1	85526589	85527470	-0.121212121212122	0.283325859450549	0.833333333333333	0.961538461538462	0.5	0.197224259527442	16	0.00229867757294535	HypoHigh	chr1	85465022	85537610	Intron1	+	WDR63	protein_coding	chr1	85526589	85527470	1	0.0121369923403317	*	*	*	*	*	0	0	*	*	*	*	*	0	0	chr1-85527380:85527735	chr1	85527380	85527735	chr1	85527380	85527470	chr1-85527464:85528237	chr1	85527464	85528237	chr1
chr1	86620892	86621215	0.666666666666667	0.382944951426972	0.666666666666667	0	0.482205555876069	0	12	5.36354336064347e-05	HyperHigh	chr1	86611867	86622023	Intron1	-	COL24A1	protein_coding	chr1	86620892	86621215	1	0.0318038597873178	*	*	*	*	*	0	0	*	*	*	*	*	0	0	chr1-86621125:86621470	chr1	86621125	86621470	chr1	86621125	86621215	chr1-86620927:86621013	chr1	86620927	86621013	chr1
chr1	86968887	86969353	0.215384615384615	-0.240898373122406	1	0.715686274509804	0.240642698295787	0.595511330378943	9	0.0122413863708279	HyperLow	*	*	*	InterGenic	*	*	*	*	*	*	*	*	*	*	*	*	*	0	0	*	*	*	*	*	0	0	chr1-86969260:86969415	chr1	86969260	86969415	chr1	86969260	86969353	chr1-86969286:86969473	chr1	86969286	86969473	chr1
chr1	87595766	87597040	-0.133333333333333	0.369765984591295	0.823529411764706	0.916666666666667	0.45698353148489	0.146498995640504	16	0.00364129534591934	HypoHigh	chr1	87569273	87599296	Intron6	+	RP5-1052I5.2	protein_coding	chr1	87595766	87597040	1	0.0424341338307298	*	*	*	*	*	0	0	*	*	*	*	*	0	0	chr1-87596545:87597215	chr1	87596545	87597215	chr1	87596545	87597040	chr1-87596774:87597678	chr1	87596774	87597678	chr1
chr1	87595766	87597040	-0.133333333333333	0.369765984591295	0.823529411764706	0.916666666666667	0.45698353148489	0.146498995640504	16	0.00364129534591934	HypoHigh	chr1	87596685	87597685	Promoter	+	RP5-1052I5.1	lincRNA	chr1	87596685	87597040	0.278649921507064	0.355	*	*	*	*	*	0	0	*	*	*	*	*	0	0	chr1-87596545:87597215	chr1	87596545	87597215	chr1	87596685	87597040	chr1-87596774:87597678	chr1	87596774	87597678	chr1
chr1	87868542	87870310	0.119100706057227	-0.257366728923719	0.815340909090909	0.683333333333333	0.374105018213642	0.656699663845364	17	0.12208138447623	HypoLow	*	*	*	InterGenic	*	*	*	*	*	*	*	*	*	*	*	*	*	0	0	*	*	*	*	*	0	0	chr1-87870005:87870270	chr1	87870005	87870270	chr1	87870005	87870270	chr1-87870070:87870346	chr1	87870070	87870346	chr1
chr1	87870743	87883448	-0.0645833333333335	0.216674140549451	0.88562091503268	1	0.323650198151556	0.16876000613148	71	3.33860061670901e-05	HypoHigh	*	*	*	InterGenic	*	*	*	*	*	*	*	*	*	*	*	*	*	0	0	*	*	*	*	*	0	0	chr1-87876825:87877050	chr1	87876825	87877050	chr1	87876825	87877050	chr1-87876786:87877106	chr1	87876786	87877106	chr1
chr1	88148416	88150348	0.1	-0.227081538941194	0.947368421052632	0.823529411764706	0.146498995640504	0.482205555876069	24	0.0031183991507994	HypoLow	*	*	*	InterGenic	*	*	*	*	*	*	*	*	*	*	*	*	*	0	0	*	*	*	*	*	0	0	chr1-88149860:88150275	chr1	88149860	88150275	chr1	88149860	88150275	chr1-88150170:88150820	chr1	88150170	88150820	chr1
chr1	88926674	88927977	-0.00757575757575801	-0.208080793274511	0.909090909090909	0.909090909090909	0.197224259527442	0.323650198151556	14	0.699592444862476	HypoLow	*	*	*	InterGenic	*	*	*	*	*	*	*	*	*	*	*	*	*	0	0	*	*	*	*	*	0	0	chr1-88927745:88928015	chr1	88927745	88928015	chr1	88927745	88927977	chr1-88927878:88928268	chr1	88927878	88928268	chr1
chr1	88928070	88928706	0.324444444444444	0.287010656924954	0.411764705882353	0.0833333333333333	0.552580908834963	0.282528226608191	18	0.000327083706985545	HyperHigh	*	*	*	InterGenic	*	*	*	*	*	*	*	*	CpG: 50	chr1	88928283	88928760	chr1	88928283	88928706	*	*	*	*	*	0	0	chr1-88928200:88929075	chr1	88928200	88929075	chr1	88928200	88928706	chr1-88928483:88928680	chr1	88928483	88928680	chr1
chr1	89740083	89746144	0.054093567251462	-0.297964118724097	0.908333333333333	0.882352941176471	0.228658419422619	0.458851878518036	23	0.255173098158559	HypoLow	*	*	*	InterGenic	*	*	*	*	*	*	*	*	*	*	*	*	*	0	0	chr1:89744927-89745106	chr1	89744927	89745106	chr1	89744927	89745106	chr1-89744920:89745155	chr1	89744920	89745155	chr1	89744920	89745155	chr1-89745422:89745598	chr1	89745422	89745598	chr1
chr1	91181963	91186113	0.226535087719298	0.222333129421211	0.3125	0.0754985754985755	0.579928993085604	0.315220101533547	121	2.18943617530879e-14	HyperHigh	chr1	91180314	91182127	Intron1	-	BARHL2	protein_coding	chr1	91181963	91182127	0.0395180722891566	0.090457804743519	CpG: 20	chr1	91182097	91182364	chr1	91182097	91182127	*	*	*	*	*	0	0	chr1-91181625:91182315	chr1	91181625	91182315	chr1	91181963	91182127	chr1-91181985:91182275	chr1	91181985	91182275	chr1
chr1	91181963	91186113	0.226535087719298	0.222333129421211	0.3125	0.0754985754985755	0.579928993085604	0.315220101533547	121	2.18943617530879e-14	HyperHigh	chr1	91182128	91182794	FirstExon	-	BARHL2	protein_coding	chr1	91182128	91182794	0.160481927710843	1	CpG: 26	chr1	91182509	91182857	chr1	91182509	91182794	*	*	*	*	*	0	0	chr1-91182325:91182955	chr1	91182325	91182955	chr1	91182325	91182794	chr1-91182576:91183056	chr1	91182576	91183056	chr1
chr1	91181963	91186113	0.226535087719298	0.222333129421211	0.3125	0.0754985754985755	0.579928993085604	0.315220101533547	121	2.18943617530879e-14	HyperHigh	chr1	91182795	91183795	Promoter	-	BARHL2	protein_coding	chr1	91182795	91183795	0.240963855421687	1	CpG: 124	chr1	91183240	91184540	chr1	91183240	91183795	chr1:91183313-91183764	chr1	91183313	91183764	chr1	91183313	91183764	chr1-91183065:91184690	chr1	91183065	91184690	chr1	91183065	91183795	chr1-91183658:91186314	chr1	91183658	91186314	chr1
chr1	91299553	91302006	0.326835664335664	0.218159160945916	0.422222222222222	0.111111111111111	0.605724351122132	0.353759374819711	65	2.09304910736855e-12	HyperHigh	chr1	91297754	91317039	Intron1	-	RP4-665J23.1	lincRNA	chr1	91299553	91302006	1	0.127197303603837	CpG: 86	chr1	91300979	91301891	chr1	91300979	91301891	*	*	*	*	*	0	0	chr1-91301625:91302035	chr1	91301625	91302035	chr1	91301625	91302006	chr1-91301830:91302090	chr1	91301830	91302090	chr1
chr1	91317367	91317835	0.210784313725491	0.179805665639753	0.384615384615385	0.0526315789473684	0.5	0.408131481801995	12	0.0174029680178426	HyperHigh	chr1	91317073	91318073	Promoter	-	RP4-665J23.1	lincRNA	chr1	91317367	91317835	1	0.468	CpG: 106	chr1	91316249	91317390	chr1	91317367	91317390	*	*	*	*	*	0	0	chr1-91317440:91317670	chr1	91317440	91317670	chr1	91317440	91317670	chr1-91317571:91317971	chr1	91317571	91317971	chr1
chr1	91317367	91317835	0.210784313725491	0.179805665639753	0.384615384615385	0.0526315789473684	0.5	0.408131481801995	12	0.0174029680178426	HyperHigh	chr1	91317316	91317836	FirstExon	+	RP4-665J23.2	lincRNA	chr1	91317367	91317835	1	0.9	CpG: 106	chr1	91316249	91317390	chr1	91317367	91317390	*	*	*	*	*	0	0	chr1-91317440:91317670	chr1	91317440	91317670	chr1	91317440	91317670	chr1-91317571:91317971	chr1	91317571	91317971	chr1
chr1	94146299	94147080	0.150375939849624	0.200219040604876	0.162280701754386	0	0.381491755465921	0.163843571686851	25	0.00285067451090079	HypoHigh	chr1	94140498	94171647	Intron3	-	BCAR3	protein_coding	chr1	94146299	94147080	1	0.0250730360525218	CpG: 116	chr1	94146321	94147504	chr1	94146321	94147080	*	*	*	*	*	0	0	chr1-94146260:94147035	chr1	94146260	94147035	chr1	94146299	94147035	chr1-94147077:94147853	chr1	94147077	94147853	chr1
chr1	95289948	95290083	-0.417420814479638	-0.260958509015286	0.149732620320855	0.522727272727272	0.458922996917637	0.767133130942286	7	0.00812704263106845	HypoLow	chr1	95286613	95290048	Intron2	+	SLC44A3	protein_coding	chr1	95289948	95290048	0.740740740740741	0.0291120815138282	*	*	*	*	*	0	0	*	*	*	*	*	0	0	*	*	*	*	*	0	0	*	*	*	*	*
chr1	95289948	95290083	-0.417420814479638	-0.260958509015286	0.149732620320855	0.522727272727272	0.458922996917637	0.767133130942286	7	0.00812704263106845	HypoLow	chr1	95290049	95290191	Exon3	+	SLC44A3	protein_coding	chr1	95290049	95290083	0.251851851851852	0.23943661971831	*	*	*	*	*	0	0	*	*	*	*	*	0	0	*	*	*	*	*	0	0	*	*	*	*	*
chr1	95393032	95393460	0.1875	0.215665381103697	0.277777777777777	0.108823529411764	0.53811555349326	0.355876930501959	15	0.0421808730387153	HypoHigh	chr1	95392835	95393835	Promoter	-	CNN3	protein_coding	chr1	95393032	95393460	1	0.428	CpG: 137	chr1	95391837	95393116	chr1	95393032	95393116	*	*	*	*	*	0	0	chr1-95393065:95393555	chr1	95393065	95393555	chr1	95393065	95393460	chr1-95393305:95393545	chr1	95393305	95393545	chr1
chr1	95393032	95393460	0.1875	0.215665381103697	0.277777777777777	0.108823529411764	0.53811555349326	0.355876930501959	15	0.0421808730387153	HypoHigh	chr1	95392121	95393121	Promoter	+	RP4-639F20.1	antisense	chr1	95393032	95393121	0.207943925233645	0.089	CpG: 137	chr1	95391837	95393116	chr1	95393032	95393116	*	*	*	*	*	0	0	chr1-95393065:95393555	chr1	95393065	95393555	chr1	95393065	95393121	chr1-95393111:95393404	chr1	95393111	95393404	chr1
chr1	95393032	95393460	0.1875	0.215665381103697	0.277777777777777	0.108823529411764	0.53811555349326	0.355876930501959	15	0.0421808730387153	HypoHigh	chr1	95393122	95393181	FirstExon	+	RP4-639F20.1	antisense	chr1	95393122	95393181	0.13785046728972	1	*	*	*	*	*	0	0	*	*	*	*	*	0	0	chr1-95393065:95393555	chr1	95393065	95393555	chr1	95393122	95393181	chr1-95393131:95393655	chr1	95393131	95393655	chr1
chr1	95393032	95393460	0.1875	0.215665381103697	0.277777777777777	0.108823529411764	0.53811555349326	0.355876930501959	15	0.0421808730387153	HypoHigh	chr1	95393182	95393906	Intron1	+	RP4-639F20.1	antisense	chr1	95393182	95393460	0.649532710280374	0.383977900552486	*	*	*	*	*	0	0	*	*	*	*	*	0	0	chr1-95393065:95393555	chr1	95393065	95393555	chr1	95393182	95393460	chr1-95393305:95393545	chr1	95393305	95393545	chr1
chr1	96366107	96376049	0.101010101010101	-0.21524282956155	0.953463203463204	0.86335403726708	0.197224259527442	0.442737648613667	41	0.00742272087151334	HypoLow	*	*	*	InterGenic	*	*	*	*	*	*	*	*	*	*	*	*	*	0	0	*	*	*	*	*	0	0	chr1-96372180:96372330	chr1	96372180	96372330	chr1	96372180	96372330	chr1-96373271:96373751	chr1	96373271	96373751	chr1
chr1	96647517	96653167	0.197619047619048	-0.25	0.912878787878788	0.784615384615384	0.240642698295787	0.5	29	0.00513472163886483	HypoLow	*	*	*	InterGenic	*	*	*	*	*	*	*	*	*	*	*	*	*	0	0	*	*	*	*	*	0	0	chr1-96652700:96652895	chr1	96652700	96652895	chr1	96652700	96652895	chr1-96650633:96651149	chr1	96650633	96651149	chr1
chr1	98989106	99004563	0.038461538461538	-0.211336249822972	0.941176470588235	0.875	0.197224259527442	0.429869519449384	70	0.00190736316590201	HypoLow	*	*	*	InterGenic	*	*	*	*	*	*	*	*	*	*	*	*	*	0	0	*	*	*	*	*	0	0	chr1-99003580:99003730	chr1	99003580	99003730	chr1	99003580	99003730	chr1-99001855:99002235	chr1	99001855	99002235	chr1
chr1	99355263	99363230	0.114285714285714	-0.221489232856564	0.933333333333333	0.833333333333333	0.287706856188877	0.452259883149013	22	0.0123230038760065	HypoLow	chr1	99355806	99358660	LastExon	-	LPPR5	protein_coding	chr1	99355806	99358660	0.358227689218024	1	*	*	*	*	*	0	0	*	*	*	*	*	0	0	*	*	*	*	*	0	0	*	*	*	*	*
chr1	99355263	99363230	0.114285714285714	-0.221489232856564	0.933333333333333	0.833333333333333	0.287706856188877	0.452259883149013	22	0.0123230038760065	HypoLow	chr1	99358661	99380356	Intron5	-	LPPR5	protein_coding	chr1	99358661	99363230	0.573490648926823	0.210601521087808	*	*	*	*	*	0	0	*	*	*	*	*	0	0	chr1-99363140:99363350	chr1	99363140	99363350	chr1	99363140	99363230	chr1-99362999:99363379	chr1	99362999	99363379	chr1
chr1	99469322	99470824	0.363636363636364	0.340638156643049	0.5	0.0666666666666667	0.58698801581456	0.270426041486378	40	9.80220995767307e-09	HyperHigh	chr1	99422298	99469990	Intron1	-	LPPR5	protein_coding	chr1	99469322	99469990	0.44474034620506	0.0140065419776902	CpG: 95	chr1	99469932	99470968	chr1	99469932	99469990	*	*	*	*	*	0	0	chr1-99469965:99470735	chr1	99469965	99470735	chr1	99469965	99469990	chr1-99469979:99470495	chr1	99469979	99470495	chr1
chr1	99469322	99470824	0.363636363636364	0.340638156643049	0.5	0.0666666666666667	0.58698801581456	0.270426041486378	40	9.80220995767307e-09	HyperHigh	chr1	99469991	99470588	FirstExon	-	LPPR5	protein_coding	chr1	99469991	99470588	0.397470039946738	1	CpG: 95	chr1	99469932	99470968	chr1	99469991	99470588	*	*	*	*	*	0	0	chr1-99469965:99470735	chr1	99469965	99470735	chr1	99469991	99470588	chr1-99470585:99470690	chr1	99470585	99470690	chr1
chr1	99469322	99470824	0.363636363636364	0.340638156643049	0.5	0.0666666666666667	0.58698801581456	0.270426041486378	40	9.80220995767307e-09	HyperHigh	chr1	99470589	99471589	Promoter	-	LPPR5	protein_coding	chr1	99470589	99470824	0.156458055925433	0.235	CpG: 95	chr1	99469932	99470968	chr1	99470589	99470824	*	*	*	*	*	0	0	chr1-99470765:99471290	chr1	99470765	99471290	chr1	99470765	99470824	chr1-99470736:99471266	chr1	99470736	99471266	chr1
chr1	99469322	99470824	0.363636363636364	0.340638156643049	0.5	0.0666666666666667	0.58698801581456	0.270426041486378	40	9.80220995767307e-09	HyperHigh	chr1	99468831	99469831	Promoter	+	RP5-896L10.1	antisense	chr1	99469322	99469831	0.338881491344873	0.509	*	*	*	*	*	0	0	*	*	*	*	*	0	0	chr1-99469325:99469735	chr1	99469325	99469735	chr1	99469325	99469735	chr1-99469829:99470405	chr1	99469829	99470405	chr1
chr1	99469322	99470824	0.363636363636364	0.340638156643049	0.5	0.0666666666666667	0.58698801581456	0.270426041486378	40	9.80220995767307e-09	HyperHigh	chr1	99469832	99470201	FirstExon	+	RP5-896L10.1	antisense	chr1	99469832	99470201	0.245672436750999	1	CpG: 95	chr1	99469932	99470968	chr1	99469932	99470201	*	*	*	*	*	0	0	chr1-99469965:99470735	chr1	99469965	99470735	chr1	99469965	99470201	chr1-99470103:99470623	chr1	99470103	99470623	chr1
chr1	99469322	99470824	0.363636363636364	0.340638156643049	0.5	0.0666666666666667	0.58698801581456	0.270426041486378	40	9.80220995767307e-09	HyperHigh	chr1	99470202	99609591	Intron1	+	RP5-896L10.1	antisense	chr1	99470202	99470824	0.414114513981358	0.00446233203480906	CpG: 95	chr1	99469932	99470968	chr1	99470202	99470824	*	*	*	*	*	0	0	chr1-99470765:99471290	chr1	99470765	99471290	chr1	99470765	99470824	chr1-99470736:99471266	chr1	99470736	99471266	chr1
chr1	100997858	101003633	0.107692307692308	-0.288618872485741	1	0.8	0	0.385593216482346	24	0.0164943731005228	HypoLow	chr1	101002692	101003692	Promoter	+	GPR88	protein_coding	chr1	101002692	101003633	0.162943722943723	0.941	*	*	*	*	*	0	0	*	*	*	*	*	0	0	chr1-101002505:101003075	chr1	101002505	101003075	chr1	101002692	101003075	chr1-101003534:101004064	chr1	101003534	101004064	chr1
chr1	101749304	101749875	0.166666666666667	-0.288618872485741	1	0.777777777777778	0.197224259527442	0.399820097767214	14	0.00244397210710975	HypoLow	*	*	*	InterGenic	*	*	*	*	*	*	*	*	*	*	*	*	*	0	0	chr1:101749748-101750147	chr1	101749748	101750147	chr1	101749748	101749875	chr1-101749665:101749910	chr1	101749665	101749910	chr1	101749665	101749875	chr1-101749642:101750052	chr1	101749642	101750052	chr1
chr1	102312387	102312670	0.46031746031746	0.288571680196704	0.571428571428571	0.111111111111111	0.686271296777067	0.45698353148489	8	0.0110722610722611	HyperHigh	chr1	102302582	102462303	Intron1	-	OLFM3	protein_coding	chr1	102312387	102312670	1	0.00177183964538163	*	*	*	*	*	0	0	*	*	*	*	*	0	0	chr1-102312420:102312830	chr1	102312420	102312830	chr1	102312420	102312670	chr1-102312293:102312937	chr1	102312293	102312937	chr1
chr1	103612148	103619778	0.0668537151702785	-0.266254385109048	0.923076923076923	0.842105263157895	0.256238809172256	0.583333333333333	31	0.00890614658643553	HypoLow	*	*	*	InterGenic	*	*	*	*	*	*	*	*	*	*	*	*	*	0	0	*	*	*	*	*	0	0	*	*	*	*	*	0	0	chr1-103617652:103618042	chr1	103617652	103618042	chr1
chr1	105056865	105068888	0.025868983957219	-0.216674140549451	0.923076923076923	0.882352941176471	0.228658419422619	0.368352163123342	65	0.0236480701806402	HypoLow	*	*	*	InterGenic	*	*	*	*	*	*	*	*	*	*	*	*	*	0	0	*	*	*	*	*	0	0	*	*	*	*	*	0	0	chr1-105068876:105069286	chr1	105068876	105069286	chr1
chr1	105165390	105175840	-0.051470588235294	0.215412992712682	0.833333333333333	0.909090909090909	0.459594497828725	0.306098611351497	42	0.0444356756423685	HypoHigh	*	*	*	InterGenic	*	*	*	*	*	*	*	*	*	*	*	*	*	0	0	*	*	*	*	*	0	0	chr1-105174640:105174975	chr1	105174640	105174975	chr1	105174640	105174975	chr1-105167213:105167492	chr1	105167213	105167492	chr1
chr1	106623495	106623958	0.400272521596051	0.136603276484976	0.778186274509804	0.247159090909091	0.501233898685782	0.446263072363596	19	5.82195475828249e-05	HyperHigh	chr1	106616034	106625586	Intron1	+	RP5-947P14.1	lincRNA	chr1	106623495	106623958	1	0.0484715242881072	CpG: 37	chr1	106623393	106623854	chr1	106623495	106623854	*	*	*	*	*	0	0	chr1-106623665:106623875	chr1	106623665	106623875	chr1	106623665	106623875	chr1-106623608:106624012	chr1	106623608	106624012	chr1
chr1	107683473	107684387	0.105263157894737	0.29731868702769	0.105263157894737	0	0.373880254062286	0.092065142549313	28	8.65483643512014e-05	HypoHigh	chr1	107682660	107683660	Promoter	+	NTNG1	protein_coding	chr1	107683473	107683660	0.204595185995624	0.187	CpG: 134	chr1	107682889	107684463	chr1	107683473	107683660	*	*	*	*	*	0	0	chr1-107683505:107684455	chr1	107683505	107684455	chr1	107683505	107683660	chr1-107683611:107683911	chr1	107683611	107683911	chr1
chr1	107683473	107684387	0.105263157894737	0.29731868702769	0.105263157894737	0	0.373880254062286	0.092065142549313	28	8.65483643512014e-05	HypoHigh	chr1	107683661	107683762	FirstExon	+	NTNG1	protein_coding	chr1	107683661	107683762	0.110503282275711	1	CpG: 134	chr1	107682889	107684463	chr1	107683661	107683762	*	*	*	*	*	0	0	chr1-107683505:107684455	chr1	107683505	107684455	chr1	107683661	107683762	chr1-107683714:107684358	chr1	107683714	107684358	chr1
chr1	107683473	107684387	0.105263157894737	0.29731868702769	0.105263157894737	0	0.373880254062286	0.092065142549313	28	8.65483643512014e-05	HypoHigh	chr1	107683763	107690690	Intron1	+	NTNG1	protein_coding	chr1	107683763	107684387	0.682713347921225	0.090082286704201	CpG: 134	chr1	107682889	107684463	chr1	107683763	107684387	*	*	*	*	*	0	0	chr1-107683505:107684455	chr1	107683505	107684455	chr1	107683763	107684387	chr1-107684351:107684941	chr1	107684351	107684941	chr1
chr1	108772454	108775325	0.102857142857143	-0.234416408649431	0.928571428571429	0.833333333333333	0.228012811879681	0.49461056894823	28	0.00192431183159147	HypoLow	chr1	108771779	108774877	Intron12	-	NBPF4	protein_coding	chr1	108772454	108774877	0.843956809474051	0.782117495158167	*	*	*	*	*	0	0	*	*	*	*	*	0	0	*	*	*	*	*	0	0	*	*	*	*	*
chr1	108772454	108775325	0.102857142857143	-0.234416408649431	0.928571428571429	0.833333333333333	0.228012811879681	0.49461056894823	28	0.00192431183159147	HypoLow	chr1	108774878	108775050	Exon12	-	NBPF4	protein_coding	chr1	108774878	108775050	0.059909439219784	1	*	*	*	*	*	0	0	*	*	*	*	*	0	0	*	*	*	*	*	0	0	*	*	*	*	*
chr1	108772454	108775325	0.102857142857143	-0.234416408649431	0.928571428571429	0.833333333333333	0.228012811879681	0.49461056894823	28	0.00192431183159147	HypoLow	chr1	108775051	108775781	Intron11	-	NBPF4	protein_coding	chr1	108775051	108775325	0.0954371299198885	0.375342465753425	*	*	*	*	*	0	0	*	*	*	*	*	0	0	*	*	*	*	*	0	0	*	*	*	*	*
chr1	108963806	108964310	0.0890688259109308	0.242156586916931	0.166666666666667	0.0555555555555556	0.419238273831796	0.182984811475013	22	0.00379841518388154	HypoHigh	chr1	108918604	108993188	Intron1	+	NBPF6	protein_coding	chr1	108963806	108964310	1	0.00675748149737209	CpG: 51	chr1	108963749	108964291	chr1	108963806	108964291	*	*	*	*	*	0	0	*	*	*	*	*	0	0	*	*	*	*	*
chr1	108963806	108964310	0.0890688259109308	0.242156586916931	0.166666666666667	0.0555555555555556	0.419238273831796	0.182984811475013	22	0.00379841518388154	HypoHigh	chr1	108963311	108964196	FirstExon	+	RP11-131J3.1	lincRNA	chr1	108963806	108964196	0.773809523809524	0.440677966101695	CpG: 51	chr1	108963749	108964291	chr1	108963806	108964196	*	*	*	*	*	0	0	*	*	*	*	*	0	0	*	*	*	*	*
chr1	108963806	108964310	0.0890688259109308	0.242156586916931	0.166666666666667	0.0555555555555556	0.419238273831796	0.182984811475013	22	0.00379841518388154	HypoHigh	chr1	108964197	108974211	Intron1	+	RP11-131J3.1	lincRNA	chr1	108964197	108964310	0.224206349206349	0.0112842021170361	CpG: 51	chr1	108963749	108964291	chr1	108964197	108964291	*	*	*	*	*	0	0	*	*	*	*	*	0	0	*	*	*	*	*
chr1	109246096	109246823	-0.380681818181818	-0.158312500400642	0.2	0.615384615384615	0.45698353148489	0.596643025103333	14	0.000145798067801423	HypoLow	*	*	*	InterGenic	*	*	*	*	*	*	*	*	*	*	*	*	*	0	0	chr1:109246671-109246905	chr1	109246671	109246905	chr1	109246671	109246823	chr1-109246620:109247030	chr1	109246620	109247030	chr1	109246620	109246823	chr1-109246638:109247282	chr1	109246638	109247282	chr1
chr1	109393103	109395987	-0.0874183006535945	-0.3369952382651	0.235294117647059	0.461538461538462	0.216674140549451	0.574667051214427	27	0.121158789543892	HypoLow	chr1	109392199	109394293	Intron2	-	AKNAD1	protein_coding	chr1	109393103	109394293	0.412621359223301	0.56829035339064	*	*	*	*	*	0	0	*	*	*	*	*	0	0	chr1-109394280:109394510	chr1	109394280	109394510	chr1	109394280	109394293	chr1-109393949:109394339	chr1	109393949	109394339	chr1
chr1	109393103	109395987	-0.0874183006535945	-0.3369952382651	0.235294117647059	0.461538461538462	0.216674140549451	0.574667051214427	27	0.121158789543892	HypoLow	chr1	109394294	109395389	Exon2	-	AKNAD1	protein_coding	chr1	109394294	109395389	0.379680998613037	1	*	*	*	*	*	0	0	*	*	*	*	*	0	0	chr1-109395240:109395610	chr1	109395240	109395610	chr1	109395240	109395389	chr1-109394800:109395092	chr1	109394800	109395092	chr1
chr1	109393103	109395987	-0.0874183006535945	-0.3369952382651	0.235294117647059	0.461538461538462	0.216674140549451	0.574667051214427	27	0.121158789543892	HypoLow	chr1	109395390	109399550	Intron1	-	AKNAD1	protein_coding	chr1	109395390	109395987	0.207004160887656	0.143509615384615	*	*	*	*	*	0	0	*	*	*	*	*	0	0	chr1-109395240:109395610	chr1	109395240	109395610	chr1	109395390	109395610	chr1-109395939:109396323	chr1	109395939	109396323	chr1
chr1	109524383	109530378	-0.0697115384615385	0.247240713249135	0.904545454545455	1	0.306703988156976	0	35	0.000449703500162306	HypoHigh	chr1	109524355	109524486	Exon13	-	WDR47	protein_coding	chr1	109524383	109524486	0.0171809841534612	0.786259541984733	*	*	*	*	*	0	0	*	*	*	*	*	0	0	*	*	*	*	*	0	0	*	*	*	*	*
chr1	109524383	109530378	-0.0697115384615385	0.247240713249135	0.904545454545455	1	0.306703988156976	0	35	0.000449703500162306	HypoHigh	chr1	109524487	109525230	Intron12	-	WDR47	protein_coding	chr1	109524487	109525230	0.123936613844871	1	*	*	*	*	*	0	0	*	*	*	*	*	0	0	*	*	*	*	*	0	0	*	*	*	*	*
chr1	109524383	109530378	-0.0697115384615385	0.247240713249135	0.904545454545455	1	0.306703988156976	0	35	0.000449703500162306	HypoHigh	chr1	109525231	109525401	Exon12	-	WDR47	protein_coding	chr1	109525231	109525401	0.0283569641367807	1	*	*	*	*	*	0	0	*	*	*	*	*	0	0	*	*	*	*	*	0	0	*	*	*	*	*
chr1	109524383	109530378	-0.0697115384615385	0.247240713249135	0.904545454545455	1	0.306703988156976	0	35	0.000449703500162306	HypoHigh	chr1	109525402	109525903	Intron11	-	WDR47	protein_coding	chr1	109525402	109525903	0.0835696413678065	1	*	*	*	*	*	0	0	*	*	*	*	*	0	0	chr1-109525845:109526015	chr1	109525845	109526015	chr1	109525845	109525903	chr1-109525757:109526370	chr1	109525757	109526370	chr1
chr1	109524383	109530378	-0.0697115384615385	0.247240713249135	0.904545454545455	1	0.306703988156976	0	35	0.000449703500162306	HypoHigh	chr1	109525904	109526073	Exon11	-	WDR47	protein_coding	chr1	109525904	109526073	0.0281901584653878	1	*	*	*	*	*	0	0	*	*	*	*	*	0	0	chr1-109525845:109526015	chr1	109525845	109526015	chr1	109525904	109526015	chr1-109525757:109526370	chr1	109525757	109526370	chr1
chr1	109524383	109530378	-0.0697115384615385	0.247240713249135	0.904545454545455	1	0.306703988156976	0	35	0.000449703500162306	HypoHigh	chr1	109526074	109529144	Intron10	-	WDR47	protein_coding	chr1	109526074	109529144	0.51209341117598	1	*	*	*	*	*	0	0	*	*	*	*	*	0	0	*	*	*	*	*	0	0	chr1-109527706:109528884	chr1	109527706	109528884	chr1
chr1	109524383	109530378	-0.0697115384615385	0.247240713249135	0.904545454545455	1	0.306703988156976	0	35	0.000449703500162306	HypoHigh	chr1	109529145	109529302	Exon10	-	WDR47	protein_coding	chr1	109529145	109529302	0.0261884904086739	1	*	*	*	*	*	0	0	*	*	*	*	*	0	0	*	*	*	*	*	0	0	*	*	*	*	*
chr1	109524383	109530378	-0.0697115384615385	0.247240713249135	0.904545454545455	1	0.306703988156976	0	35	0.000449703500162306	HypoHigh	chr1	109529303	109533875	Intron9	-	WDR47	protein_coding	chr1	109529303	109530378	0.179316096747289	0.235126859142607	*	*	*	*	*	0	0	*	*	*	*	*	0	0	*	*	*	*	*	0	0	*	*	*	*	*
chr1	109998825	110002448	-0.103174603174604	0.278822171978894	0.861904761904762	1	0.49767228304819	0.222343476214566	27	0.0014384897266599	HypoHigh	*	*	*	InterGenic	*	*	*	*	*	*	*	*	*	*	*	*	*	0	0	*	*	*	*	*	0	0	*	*	*	*	*	0	0	chr1-110000480:110000736	chr1	110000480	110000736	chr1
chr1	110644191	110647146	-0.135416666666667	0.211427956211119	0.763636363636363	0.939338235294118	0.42154043403449	0.228658419422619	23	0.0156583243105658	HypoHigh	chr1	110625475	110651466	Intron1	+	RP4-773N10.6	antisense	chr1	110644191	110647146	1	0.113693201492824	*	*	*	*	*	0	0	*	*	*	*	*	0	0	chr1-110646805:110646955	chr1	110646805	110646955	chr1	110646805	110646955	chr1-110644857:110645141	chr1	110644857	110645141	chr1
chr1	110692988	110694281	0.121323529411764	0.253238382278481	0.158333333333333	0	0.454487246782128	0.181511480181641	41	2.23796485489665e-05	HypoHigh	chr1	110692107	110693107	Promoter	+	SLC6A17	protein_coding	chr1	110692988	110693107	0.0920340293890178	0.119	CpG: 140	chr1	110692988	110694264	chr1	110692988	110693107	*	*	*	*	*	0	0	chr1-110692885:110694315	chr1	110692885	110694315	chr1	110692988	110693107	chr1-110693099:110693443	chr1	110693099	110693443	chr1
chr1	110692988	110694281	0.121323529411764	0.253238382278481	0.158333333333333	0	0.454487246782128	0.181511480181641	41	2.23796485489665e-05	HypoHigh	chr1	110693108	110693505	FirstExon	+	SLC6A17	protein_coding	chr1	110693108	110693505	0.307037896365043	1	CpG: 140	chr1	110692988	110694264	chr1	110693108	110693505	*	*	*	*	*	0	0	chr1-110692885:110694315	chr1	110692885	110694315	chr1	110693108	110693505	chr1-110693230:110693577	chr1	110693230	110693577	chr1
chr1	110692988	110694281	0.121323529411764	0.253238382278481	0.158333333333333	0	0.454487246782128	0.181511480181641	41	2.23796485489665e-05	HypoHigh	chr1	110693506	110709464	Intron1	+	SLC6A17	protein_coding	chr1	110693506	110694281	0.59938128383604	0.0485649830805865	CpG: 140	chr1	110692988	110694264	chr1	110693506	110694264	*	*	*	*	*	0	0	chr1-110692885:110694315	chr1	110692885	110694315	chr1	110693506	110694281	chr1-110693755:110694438	chr1	110693755	110694438	chr1
chr1	110755492	110757460	-0.143650793650793	0.25	0.788888888888889	0.944444444444444	0.514160416786859	0.273370654823642	11	0.050671808921563	HypoHigh	chr1	110754800	110825155	Intron1	+	KCNC4	protein_coding	chr1	110755492	110757460	1	0.0279724255561083	*	*	*	*	*	0	0	*	*	*	*	*	0	0	chr1-110757140:110757535	chr1	110757140	110757535	chr1	110757140	110757460	chr1-110757431:110758047	chr1	110757431	110758047	chr1
chr1	110778373	110783273	0.048809523809524	-0.274732209043422	1	0.882352941176471	0.270426041486378	0.428845880176239	43	0.00651111602702032	HypoLow	chr1	110754800	110825155	Intron1	+	KCNC4	protein_coding	chr1	110778373	110783273	1	0.0696467912728306	*	*	*	*	*	0	0	chr1:110778589-110778756	chr1	110778589	110778756	chr1	110778589	110778756	chr1-110782485:110783355	chr1	110782485	110783355	chr1	110782485	110783273	chr1-110783128:110783528	chr1	110783128	110783528	chr1
chr1	111098211	111098455	0.182608695652174	0.301169560509072	0.4	0.0454545454545455	0.732386574474716	0.34961375348872	10	0.0369884324237063	HypoHigh	*	*	*	InterGenic	*	*	*	*	*	*	*	*	CpG: 33	chr1	111098066	111098362	chr1	111098211	111098362	*	*	*	*	*	0	0	chr1-111097905:111098555	chr1	111097905	111098555	chr1	111098211	111098455	chr1-111098037:111098220	chr1	111098037	111098220	chr1
chr1	111813226	111814302	0.326666666666667	0.093140105874069	0.636029411764706	0.193452380952381	0.545773895644511	0.470655816047343	33	5.28459296380096e-06	HyperHigh	*	*	*	InterGenic	*	*	*	*	*	*	*	*	CpG: 36	chr1	111813411	111813853	chr1	111813411	111813853	*	*	*	*	*	0	0	chr1-111814045:111814575	chr1	111814045	111814575	chr1	111814045	111814302	chr1-111814161:111814361	chr1	111814161	111814361	chr1
chr1	111903911	111905167	-0.07967032967033	0.252957840834529	0.820855614973262	1	0.5	0.167752778258549	17	0.00632642028048314	HypoHigh	*	*	*	InterGenic	*	*	*	*	*	*	*	*	*	*	*	*	*	0	0	*	*	*	*	*	0	0	chr1-111904380:111904670	chr1	111904380	111904670	chr1	111904380	111904670	chr1-111904436:111904706	chr1	111904436	111904706	chr1
chr1	112449305	112452164	-0.137400793650793	0.348879624155236	0.775	0.940350877192982	0.486382639009082	0.162042321394155	19	0.00774108299089666	HypoHigh	chr1	112329729	112524242	Intron2	-	KCND3	protein_coding	chr1	112449305	112452164	1	0.0146982463897015	*	*	*	*	*	0	0	*	*	*	*	*	0	0	chr1-112451725:112451995	chr1	112451725	112451995	chr1	112451725	112451995	chr1-112451766:112451895	chr1	112451766	112451895	chr1
chr1	112449305	112452164	-0.137400793650793	0.348879624155236	0.775	0.940350877192982	0.486382639009082	0.162042321394155	19	0.00774108299089666	HypoHigh	chr1	112451269	112452269	Promoter	+	KCND3-AS1	antisense	chr1	112451269	112452164	0.313046519762155	0.895	*	*	*	*	*	0	0	*	*	*	*	*	0	0	chr1-112451725:112451995	chr1	112451725	112451995	chr1	112451725	112451995	chr1-112451766:112451895	chr1	112451766	112451895	chr1
chr1	112532952	112533622	0.133333333333333	0.35237755753414	0.211111111111111	0.0208333333333333	0.55976201393497	0.15284586417988	23	8.57550270158597e-05	HypoHigh	chr1	112532157	112533157	Promoter	+	RP11-88H9.2	lincRNA	chr1	112532952	112533157	0.305970149253731	0.205	CpG: 189	chr1	112531559	112533773	chr1	112532952	112533157	*	*	*	*	*	0	0	chr1-112533060:112533575	chr1	112533060	112533575	chr1	112533060	112533157	chr1-112533079:112534292	chr1	112533079	112534292	chr1
chr1	112532952	112533622	0.133333333333333	0.35237755753414	0.211111111111111	0.0208333333333333	0.55976201393497	0.15284586417988	23	8.57550270158597e-05	HypoHigh	chr1	112533158	112533809	FirstExon	+	RP11-88H9.2	lincRNA	chr1	112533158	112533622	0.692537313432836	0.712749615975422	CpG: 189	chr1	112531559	112533773	chr1	112533158	112533622	*	*	*	*	*	0	0	chr1-112533585:112533855	chr1	112533585	112533855	chr1	112533585	112533622	chr1-112533612:112533992	chr1	112533612	112533992	chr1
chr1	112606528	112607185	0.270833333333333	-0.288486301864333	0.8125	0.5	0.240642698295787	0.656603688426032	10	0.00911778211497748	HyperLow	*	*	*	InterGenic	*	*	*	*	*	*	*	*	*	*	*	*	*	0	0	*	*	*	*	*	0	0	chr1-112607000:112607230	chr1	112607000	112607230	chr1	112607000	112607185	chr1-112607008:112607272	chr1	112607008	112607272	chr1
chr1	113051566	113052400	0.2	0.214548798693221	0.333333333333333	0.0526315789473684	0.523650198151556	0.323650198151556	28	0.00528876925452849	-	chr1	113033704	113057495	Intron2	+	WNT2B	protein_coding	chr1	113051566	113052400	1	0.0350552730023959	CpG: 144	chr1	113050813	113052301	chr1	113051566	113052301	*	*	*	*	*	0	0	chr1-113050505:113052695	chr1	113050505	113052695	chr1	113051566	113052400	chr1-113052035:113052328	chr1	113052035	113052328	chr1
chr1	113253468	113254291	0.386097820308346	-0.207486481587776	0.838095238095238	0.297979797979798	0.238443386522983	0.612197222702993	11	0.0373481613419407	HyperLow	chr1	113253366	113253473	Exon2	-	RP11-426L16.10	protein_coding	chr1	113253468	113253473	0.00607533414337789	0.0467289719626168	*	*	*	*	*	0	0	*	*	*	*	*	0	0	chr1-113253445:113253595	chr1	113253445	113253595	chr1	113253468	113253473	chr1-113253411:113254016	chr1	113253411	113254016	chr1
chr1	113253468	113254291	0.386097820308346	-0.207486481587776	0.838095238095238	0.297979797979798	0.238443386522983	0.612197222702993	11	0.0373481613419407	HyperLow	chr1	113253474	113253887	Intron1	-	RP11-426L16.10	protein_coding	chr1	113253474	113253887	0.501822600243013	1	*	*	*	*	*	0	0	*	*	*	*	*	0	0	chr1-113253740:113254050	chr1	113253740	113254050	chr1	113253740	113253887	chr1-113253651:113254035	chr1	113253651	113254035	chr1
chr1	113253468	113254291	0.386097820308346	-0.207486481587776	0.838095238095238	0.297979797979798	0.238443386522983	0.612197222702993	11	0.0373481613419407	HyperLow	chr1	113253888	113254055	FirstExon	-	RP11-426L16.10	protein_coding	chr1	113253888	113254055	0.202916160388821	1	*	*	*	*	*	0	0	*	*	*	*	*	0	0	chr1-113253740:113254050	chr1	113253740	113254050	chr1	113253888	113254050	chr1-113253651:113254035	chr1	113253651	113254035	chr1
chr1	113253468	113254291	0.386097820308346	-0.207486481587776	0.838095238095238	0.297979797979798	0.238443386522983	0.612197222702993	11	0.0373481613419407	HyperLow	chr1	113254056	113255056	Promoter	-	RP11-426L16.10	protein_coding	chr1	113254056	113254291	0.285540704738761	0.235	*	*	*	*	*	0	0	*	*	*	*	*	0	0	chr1-113254240:113254390	chr1	113254240	113254390	chr1	113254240	113254291	chr1-113253577:113254125	chr1	113253577	113254125	chr1
chr1	113253468	113254291	0.386097820308346	-0.207486481587776	0.838095238095238	0.297979797979798	0.238443386522983	0.612197222702993	11	0.0373481613419407	HyperLow	chr1	113253366	113253473	Exon8	-	PPM1J	protein_coding	chr1	113253468	113253473	0.00607533414337789	0.0467289719626168	*	*	*	*	*	0	0	*	*	*	*	*	0	0	chr1-113253445:113253595	chr1	113253445	113253595	chr1	113253468	113253473	chr1-113253411:113254016	chr1	113253411	113254016	chr1
chr1	113253468	113254291	0.386097820308346	-0.207486481587776	0.838095238095238	0.297979797979798	0.238443386522983	0.612197222702993	11	0.0373481613419407	HyperLow	chr1	113253474	113253629	Intron7	-	PPM1J	protein_coding	chr1	113253474	113253629	0.188335358444714	1	*	*	*	*	*	0	0	*	*	*	*	*	0	0	chr1-113253445:113253595	chr1	113253445	113253595	chr1	113253474	113253595	chr1-113253577:113254125	chr1	113253577	113254125	chr1
chr1	113253468	113254291	0.386097820308346	-0.207486481587776	0.838095238095238	0.297979797979798	0.238443386522983	0.612197222702993	11	0.0373481613419407	HyperLow	chr1	113253630	113253693	Exon7	-	PPM1J	protein_coding	chr1	113253630	113253693	0.0765492102065614	1	*	*	*	*	*	0	0	*	*	*	*	*	0	0	*	*	*	*	*	0	0	chr1-113253651:113254035	chr1	113253651	113254035	chr1
chr1	113253468	113254291	0.386097820308346	-0.207486481587776	0.838095238095238	0.297979797979798	0.238443386522983	0.612197222702993	11	0.0373481613419407	HyperLow	chr1	113253694	113253887	Intron6	-	PPM1J	protein_coding	chr1	113253694	113253887	0.234507897934386	1	*	*	*	*	*	0	0	*	*	*	*	*	0	0	chr1-113253740:113254050	chr1	113253740	113254050	chr1	113253740	113253887	chr1-113253651:113254035	chr1	113253651	113254035	chr1
chr1	113253468	113254291	0.386097820308346	-0.207486481587776	0.838095238095238	0.297979797979798	0.238443386522983	0.612197222702993	11	0.0373481613419407	HyperLow	chr1	113253888	113254006	Exon6	-	PPM1J	protein_coding	chr1	113253888	113254006	0.143377885783718	1	*	*	*	*	*	0	0	*	*	*	*	*	0	0	chr1-113253740:113254050	chr1	113253740	113254050	chr1	113253888	113254006	chr1-113253651:113254035	chr1	113253651	113254035	chr1
chr1	113253468	113254291	0.386097820308346	-0.207486481587776	0.838095238095238	0.297979797979798	0.238443386522983	0.612197222702993	11	0.0373481613419407	HyperLow	chr1	113254007	113254592	Intron5	-	PPM1J	protein_coding	chr1	113254007	113254291	0.345078979343864	0.485470085470085	*	*	*	*	*	0	0	*	*	*	*	*	0	0	chr1-113254240:113254390	chr1	113254240	113254390	chr1	113254240	113254291	chr1-113253651:113254035	chr1	113253651	113254035	chr1
chr1	113392683	113393125	0.156035469107552	0.223579638700137	0.444444444444445	0.100961538461538	0.589505231041679	0.349152386402016	17	0.0748527955157886	HypoHigh	chr1	113392302	113393265	FirstExon	-	RP11-426L16.8	lincRNA	chr1	113392683	113393125	1	0.458982346832814	CpG: 71	chr1	113392142	113392807	chr1	113392683	113392807	*	*	*	*	*	0	0	chr1-113392280:113393270	chr1	113392280	113393270	chr1	113392683	113393125	chr1-113392236:113392876	chr1	113392236	113392876	chr1
chr1	113392683	113393125	0.156035469107552	0.223579638700137	0.444444444444445	0.100961538461538	0.589505231041679	0.349152386402016	17	0.0748527955157886	HypoHigh	chr1	113392650	113393049	FirstExon	+	RP3-522D1.1	lincRNA	chr1	113392683	113393049	0.828054298642534	0.917293233082707	CpG: 71	chr1	113392142	113392807	chr1	113392683	113392807	*	*	*	*	*	0	0	chr1-113392280:113393270	chr1	113392280	113393270	chr1	113392683	113393049	chr1-113392236:113392876	chr1	113392236	113392876	chr1
chr1	113392683	113393125	0.156035469107552	0.223579638700137	0.444444444444445	0.100961538461538	0.589505231041679	0.349152386402016	17	0.0748527955157886	HypoHigh	chr1	113393050	113419561	Intron1	+	RP3-522D1.1	lincRNA	chr1	113393050	113393125	0.169683257918552	0.00282901437139301	*	*	*	*	*	0	0	*	*	*	*	*	0	0	chr1-113392280:113393270	chr1	113392280	113393270	chr1	113393050	113393125	*	*	*	*	*
chr1	115397393	115398114	0.266541353383459	0.210261853024446	0.43287037037037	0.0816666666666667	0.649257032970597	0.398250897659601	25	0.000230588845296132	HyperHigh	chr1	115396423	115397423	Promoter	+	SYCP1	protein_coding	chr1	115397393	115397423	0.0416088765603329	0.03	*	*	*	*	*	0	0	*	*	*	*	*	0	0	chr1-115397420:115397575	chr1	115397420	115397575	chr1	115397420	115397423	chr1-115397391:115397613	chr1	115397391	115397613	chr1
chr1	115397393	115398114	0.266541353383459	0.210261853024446	0.43287037037037	0.0816666666666667	0.649257032970597	0.398250897659601	25	0.000230588845296132	HyperHigh	chr1	115397424	115397639	FirstExon	+	SYCP1	protein_coding	chr1	115397424	115397639	0.298196948682386	1	CpG: 37	chr1	115397448	115397942	chr1	115397448	115397639	*	*	*	*	*	0	0	chr1-115397600:115397770	chr1	115397600	115397770	chr1	115397600	115397639	chr1-115397614:115397814	chr1	115397614	115397814	chr1
chr1	115397393	115398114	0.266541353383459	0.210261853024446	0.43287037037037	0.0816666666666667	0.649257032970597	0.398250897659601	25	0.000230588845296132	HyperHigh	chr1	115397640	115398061	Intron1	+	SYCP1	protein_coding	chr1	115397640	115398061	0.583911234396671	1	CpG: 37	chr1	115397448	115397942	chr1	115397640	115397942	*	*	*	*	*	0	0	chr1-115397600:115397770	chr1	115397600	115397770	chr1	115397640	115397770	chr1-115397614:115397814	chr1	115397614	115397814	chr1
chr1	115397393	115398114	0.266541353383459	0.210261853024446	0.43287037037037	0.0816666666666667	0.649257032970597	0.398250897659601	25	0.000230588845296132	HyperHigh	chr1	115398062	115398193	Exon2	+	SYCP1	protein_coding	chr1	115398062	115398114	0.072122052704577	0.396946564885496	*	*	*	*	*	0	0	*	*	*	*	*	0	0	*	*	*	*	*	0	0	chr1-115397519:115398367	chr1	115397519	115398367	chr1
chr1	115631514	115632849	0.126262626262626	0.401012606070068	0.166666666666667	0	0.539063190864238	0.103181143050108	36	7.24332364512317e-07	HypoHigh	chr1	115615629	115631984	Intron1	-	TSPAN2	protein_coding	chr1	115631514	115631984	0.352059925093633	0.0287373891776215	CpG: 64	chr1	115631850	115632584	chr1	115631850	115631984	*	*	*	*	*	0	0	chr1-115631445:115633475	chr1	115631445	115633475	chr1	115631514	115631984	chr1-115631878:115633001	chr1	115631878	115633001	chr1
chr1	115631514	115632849	0.126262626262626	0.401012606070068	0.166666666666667	0	0.539063190864238	0.103181143050108	36	7.24332364512317e-07	HypoHigh	chr1	115631985	115632085	FirstExon	-	TSPAN2	protein_coding	chr1	115631985	115632085	0.0749063670411985	1	CpG: 64	chr1	115631850	115632584	chr1	115631985	115632085	*	*	*	*	*	0	0	chr1-115631445:115633475	chr1	115631445	115633475	chr1	115631985	115632085	chr1-115631878:115633001	chr1	115631878	115633001	chr1
chr1	115631514	115632849	0.126262626262626	0.401012606070068	0.166666666666667	0	0.539063190864238	0.103181143050108	36	7.24332364512317e-07	HypoHigh	chr1	115632086	115633086	Promoter	-	TSPAN2	protein_coding	chr1	115632086	115632849	0.571535580524345	0.763	CpG: 64	chr1	115631850	115632584	chr1	115632086	115632584	*	*	*	*	*	0	0	chr1-115631445:115633475	chr1	115631445	115633475	chr1	115632086	115632849	chr1-115632594:115632856	chr1	115632594	115632856	chr1
chr1	115690483	115690850	0.198717948717949	0.466465823449233	0.215384615384616	0	0.53554878664931	0	11	0.000325245549468676	HypoHigh	*	*	*	InterGenic	*	*	*	*	*	*	*	*	*	*	*	*	*	0	0	*	*	*	*	*	0	0	*	*	*	*	*	0	0	chr1-115690501:115690851	chr1	115690501	115690851	chr1
chr1	115879863	115881374	0.299019607843138	0.290195668316991	0.4	0.0714285714285714	0.653049305675748	0.385593216482346	46	4.07515431231256e-10	HyperHigh	chr1	115825862	115908290	Intron1	+	RP4-663N10.1	antisense	chr1	115879863	115881374	1	0.018331149609356	CpG: 103	chr1	115880167	115881332	chr1	115880167	115881332	*	*	*	*	*	0	0	chr1-115881125:115881515	chr1	115881125	115881515	chr1	115881125	115881374	chr1-115880731:115880967	chr1	115880731	115880967	chr1
chr1	115879863	115881374	0.299019607843138	0.290195668316991	0.4	0.0714285714285714	0.653049305675748	0.385593216482346	46	4.07515431231256e-10	HyperHigh	chr1	115836372	115880824	Intron1	-	NGF	protein_coding	chr1	115879863	115880824	0.636002647253475	0.021618824799784	CpG: 103	chr1	115880167	115881332	chr1	115880167	115880824	*	*	*	*	*	0	0	chr1-115879185:115880990	chr1	115879185	115880990	chr1	115879863	115880824	chr1-115880731:115880967	chr1	115880731	115880967	chr1
chr1	115879863	115881374	0.299019607843138	0.290195668316991	0.4	0.0714285714285714	0.653049305675748	0.385593216482346	46	4.07515431231256e-10	HyperHigh	chr1	115880825	115880857	FirstExon	-	NGF	protein_coding	chr1	115880825	115880857	0.0211780277961615	1	CpG: 103	chr1	115880167	115881332	chr1	115880825	115880857	*	*	*	*	*	0	0	chr1-115879185:115880990	chr1	115879185	115880990	chr1	115880825	115880857	chr1-115880731:115880967	chr1	115880731	115880967	chr1
chr1	115879863	115881374	0.299019607843138	0.290195668316991	0.4	0.0714285714285714	0.653049305675748	0.385593216482346	46	4.07515431231256e-10	HyperHigh	chr1	115880858	115881858	Promoter	-	NGF	protein_coding	chr1	115880858	115881374	0.341495698213104	0.516	CpG: 103	chr1	115880167	115881332	chr1	115880858	115881332	*	*	*	*	*	0	0	chr1-115881125:115881515	chr1	115881125	115881515	chr1	115881125	115881374	chr1-115880731:115880967	chr1	115880731	115880967	chr1
chr1	116289148	116292472	-0.089105339105339	0.298746875060097	0.738636363636364	0.925824175824176	0.482938545241728	0.198931144141325	17	0.120160329271358	HypoHigh	chr1	116287534	116310928	Intron1	-	CASQ2	protein_coding	chr1	116289148	116292472	1	0.142087714798666	*	*	*	*	*	0	0	chr1:116291091-116291334	chr1	116291091	116291334	chr1	116291091	116291334	chr1-116291745:116291895	chr1	116291745	116291895	chr1	116291745	116291895	chr1-116292467:116292735	chr1	116292467	116292735	chr1
chr1	116370810	116371319	0.222222222222222	0.528320833573719	0.222222222222222	0	0.549799156782566	0	20	5.28464310865336e-06	HyperHigh	*	*	*	InterGenic	*	*	*	*	*	*	*	*	CpG: 48	chr1	116370810	116371303	chr1	116370810	116371303	chr1:116370977-116371565	chr1	116370977	116371565	chr1	116370977	116371319	chr1-116370840:116371670	chr1	116370840	116371670	chr1	116370840	116371319	chr1-116371176:116371420	chr1	116371176	116371420	chr1
chr1	116380327	116382542	0.188988095238095	0.307739890778503	0.277777777777778	0	0.553200459752515	0.238443386522983	67	2.5299158411581e-09	HypoHigh	chr1	116379313	116386538	FirstExon	-	NHLH2	protein_coding	chr1	116380327	116382542	1	0.306574394463668	CpG: 209	chr1	116380359	116382364	chr1	116380359	116382364	*	*	*	*	*	0	0	chr1-116380405:116382775	chr1	116380405	116382775	chr1	116380405	116382542	chr1-116382181:116382437	chr1	116382181	116382437	chr1
chr1	116917030	116917683	0.253030303030303	-0.103819947237768	0.784615384615384	0.330357142857143	0.288262326418938	0.477376465118918	15	0.0428932604279595	HyperLow	chr1	116916146	116926635	Intron1	+	ATP1A1	protein_coding	chr1	116917030	116917683	1	0.0622556964438936	*	*	*	*	*	0	0	*	*	*	*	*	0	0	chr1-116917020:116918090	chr1	116917020	116918090	chr1	116917030	116917683	chr1-116917594:116918244	chr1	116917594	116918244	chr1
chr1	118149597	118150000	0.383116883116884	0.451357462894794	0.428571428571429	0.0454545454545455	0.63943194468483	0.146498995640504	10	0.000379185508596998	HyperHigh	chr1	118148776	118165463	Intron1	+	FAM46C	protein_coding	chr1	118149597	118150000	1	0.0241505363456583	CpG: 136	chr1	118147958	118149670	chr1	118149597	118149670	*	*	*	*	*	0	0	chr1-118149960:118150495	chr1	118149960	118150495	chr1	118149960	118150000	chr1-118149914:118150434	chr1	118149914	118150434	chr1
chr1	118727640	118728211	0.209090909090909	0.218692063234381	0.428571428571429	0.0952380952380952	0.528320833573719	0.304727612811738	16	0.0013920182795472	HyperHigh	chr1	118693993	118727693	Intron1	-	SPAG17	protein_coding	chr1	118727640	118727693	0.0928196147110333	0.0015727002967359	*	*	*	*	*	0	0	*	*	*	*	*	0	0	*	*	*	*	*	0	0	chr1-118727677:118728205	chr1	118727677	118728205	chr1
chr1	118727640	118728211	0.209090909090909	0.218692063234381	0.428571428571429	0.0952380952380952	0.528320833573719	0.304727612811738	16	0.0013920182795472	HyperHigh	chr1	118727694	118727846	FirstExon	-	SPAG17	protein_coding	chr1	118727694	118727846	0.266199649737303	1	CpG: 23	chr1	118727816	118728097	chr1	118727816	118727846	*	*	*	*	*	0	0	chr1-118727765:118728390	chr1	118727765	118728390	chr1	118727765	118727846	chr1-118727840:118728484	chr1	118727840	118728484	chr1
chr1	118727640	118728211	0.209090909090909	0.218692063234381	0.428571428571429	0.0952380952380952	0.528320833573719	0.304727612811738	16	0.0013920182795472	HyperHigh	chr1	118727847	118728847	Promoter	-	SPAG17	protein_coding	chr1	118727847	118728211	0.637478108581436	0.364	CpG: 23	chr1	118727816	118728097	chr1	118727847	118728097	*	*	*	*	*	0	0	chr1-118727765:118728390	chr1	118727765	118728390	chr1	118727847	118728211	chr1-118728209:118728605	chr1	118728209	118728605	chr1
chr1	119521913	119527155	0.210526315789474	0.214548798693221	0.444444444444444	0.111111111111111	0.597493750120193	0.353759374819711	92	1.5652734305238e-12	HyperHigh	chr1	119474456	119531977	Intron1	-	TBX15	protein_coding	chr1	119521913	119527155	1	0.0911319344239495	CpG: 35	chr1	119526782	119527192	chr1	119526782	119527155	chr1:119526348-119526895	chr1	119526348	119526895	chr1	119526348	119526895	chr1-119526805:119528235	chr1	119526805	119528235	chr1	119526805	119527155	chr1-119527144:119530699	chr1	119527144	119530699	chr1
chr1	119545274	119551546	0.20979020979021	0.243191319504541	0.333333333333333	0.0666666666666667	0.576524652837874	0.288618872485741	118	8.71349296323442e-13	HyperHigh	*	*	*	InterGenic	*	*	*	*	*	*	*	*	CpG: 176	chr1	119549144	119551320	chr1	119549144	119551320	*	*	*	*	*	0	0	chr1-119551065:119551610	chr1	119551065	119551610	chr1	119551065	119551546	chr1-119551353:119551567	chr1	119551353	119551567	chr1
chr1	120904366	120905280	0.259504526661681	0.33253150150259	0.428427419354839	0.11814556331007	0.743279073512336	0.423927817749754	29	5.78810159108402e-07	HyperHigh	chr1	120903254	120905006	Intron1	-	RP11-439A17.4	lincRNA	chr1	120904366	120905006	0.700218818380744	0.365296803652968	CpG: 42	chr1	120904698	120905076	chr1	120904698	120905006	*	*	*	*	*	0	0	chr1-120904500:120905350	chr1	120904500	120905350	chr1	120904500	120905006	chr1-120904702:120905089	chr1	120904702	120905089	chr1
chr1	120904366	120905280	0.259504526661681	0.33253150150259	0.428427419354839	0.11814556331007	0.743279073512336	0.423927817749754	29	5.78810159108402e-07	HyperHigh	chr1	120905007	120905159	FirstExon	-	RP11-439A17.4	lincRNA	chr1	120905007	120905159	0.166301969365427	1	CpG: 42	chr1	120904698	120905076	chr1	120905007	120905076	*	*	*	*	*	0	0	chr1-120904500:120905350	chr1	120904500	120905350	chr1	120905007	120905159	chr1-120904702:120905089	chr1	120904702	120905089	chr1
chr1	120904366	120905280	0.259504526661681	0.33253150150259	0.428427419354839	0.11814556331007	0.743279073512336	0.423927817749754	29	5.78810159108402e-07	HyperHigh	chr1	120905160	120906160	Promoter	-	RP11-439A17.4	lincRNA	chr1	120905160	120905280	0.131291028446389	0.12	*	*	*	*	*	0	0	*	*	*	*	*	0	0	chr1-120904500:120905350	chr1	120904500	120905350	chr1	120905160	120905280	chr1-120904604:120905533	chr1	120904604	120905533	chr1
chr1	120904366	120905280	0.259504526661681	0.33253150150259	0.428427419354839	0.11814556331007	0.743279073512336	0.423927817749754	29	5.78810159108402e-07	HyperHigh	chr1	120905027	120906027	Promoter	+	HIST2H2BA	pseudogene	chr1	120905027	120905280	0.276805251641138	0.253	CpG: 42	chr1	120904698	120905076	chr1	120905027	120905076	*	*	*	*	*	0	0	chr1-120904500:120905350	chr1	120904500	120905350	chr1	120905027	120905280	chr1-120904702:120905089	chr1	120904702	120905089	chr1
chr1	143663818	143664559	0.230725623582766	-0.181341663049396	0.788888888888889	0.59041394335512	0.328808909576947	0.585889974659545	21	0.000479268988718893	HyperLow	chr1	143662698	143664196	Exon2	-	RP6-206I17.1	lincRNA	chr1	143663818	143664196	0.510121457489879	0.252336448598131	CpG: 22	chr1	143663818	143664138	chr1	143663818	143664138	*	*	*	*	*	0	0	*	*	*	*	*	0	0	*	*	*	*	*
chr1	143663818	143664559	0.230725623582766	-0.181341663049396	0.788888888888889	0.59041394335512	0.328808909576947	0.585889974659545	21	0.000479268988718893	HyperLow	chr1	143664197	143744200	Intron1	-	RP6-206I17.1	lincRNA	chr1	143664197	143664559	0.488529014844804	0.00452483031886304	*	*	*	*	*	0	0	*	*	*	*	*	0	0	*	*	*	*	*	0	0	*	*	*	*	*
chr1	145713966	145714419	0.347032123886344	-0.108439279031433	0.617647058823529	0.225	0.284246752649023	0.503548251421005	13	0.0141170061133763	HyperLow	chr1	145706828	145715525	Intron1	-	CD160	protein_coding	chr1	145713966	145714419	1	0.0520869265263884	CpG: 17	chr1	145713966	145714203	chr1	145713966	145714203	*	*	*	*	*	0	0	chr1-145714025:145714510	chr1	145714025	145714510	chr1	145714025	145714419	chr1-145714227:145714463	chr1	145714227	145714463	chr1
chr1	145944003	145946065	0.20716143759622	0.0927355531137605	0.374840357598978	0.128205128205128	0.61412366439237	0.468764025873843	65	2.49115288072082e-08	HyperHigh	*	*	*	InterGenic	*	*	*	*	*	*	*	*	CpG: 28	chr1	145945256	145945599	chr1	145945256	145945599	*	*	*	*	*	0	0	*	*	*	*	*	0	0	*	*	*	*	*
chr1	145963278	145964587	0.207371794871795	-0.123803453319477	0.6	0.252450980392157	0.5671934987691	0.671696097762851	47	0.000525642616711527	HyperLow	*	*	*	InterGenic	*	*	*	*	*	*	*	*	CpG: 24	chr1	145963432	145963705	chr1	145963432	145963705	*	*	*	*	*	0	0	*	*	*	*	*	0	0	*	*	*	*	*
chr1	145978998	145980033	0.199650912996778	0.371828728157823	0.245689655172414	0.0863354037267081	0.710492796913603	0.320416412289856	35	1.03557561682276e-07	HypoHigh	*	*	*	InterGenic	*	*	*	*	*	*	*	*	CpG: 60	chr1	145979221	145979979	chr1	145979221	145979979	*	*	*	*	*	0	0	*	*	*	*	*	0	0	*	*	*	*	*
chr1	145990589	145992061	0.15890613451589	0.240565736215032	0.307692307692308	0.133333333333333	0.676468981721867	0.425871145606372	48	1.74421303290213e-05	HypoHigh	*	*	*	InterGenic	*	*	*	*	*	*	*	*	CpG: 16	chr1	145991871	145992084	chr1	145991871	145992061	*	*	*	*	*	0	0	*	*	*	*	*	0	0	chr1-145991393:145991977	chr1	145991393	145991977	chr1
chr1	146019785	146023062	0.096781842818428	-0.263857584107101	0.89572192513369	0.75140252454418	0.310659356442522	0.56451246783678	23	0.0273106288360642	HypoLow	*	*	*	InterGenic	*	*	*	*	*	*	*	*	*	*	*	*	*	0	0	*	*	*	*	*	0	0	*	*	*	*	*	0	0	*	*	*	*	*
chr1	146086284	146087754	0.175	0.253224156665178	0.4	0.125	0.597493750120193	0.306098611351497	20	0.00237563083371866	HypoHigh	*	*	*	InterGenic	*	*	*	*	*	*	*	*	*	*	*	*	*	0	0	*	*	*	*	*	0	0	*	*	*	*	*	0	0	*	*	*	*	*
chr1	146548656	146551447	0.210421888053467	0.399961601645677	0.310714285714285	0.111111111111111	0.68105053361012	0.240642698295787	61	1.01367674655811e-07	HyperHigh	*	*	*	InterGenic	*	*	*	*	*	*	*	*	CpG: 71	chr1	146550290	146551260	chr1	146550290	146551260	*	*	*	*	*	0	0	chr1-146549505:146552150	chr1	146549505	146552150	chr1	146549505	146551447	chr1-146551419:146551597	chr1	146551419	146551597	chr1
chr1	147520731	147521766	0.199650912996778	0.371828728157823	0.245689655172414	0.0863354037267081	0.710492796913603	0.320416412289856	35	1.03557561682276e-07	HypoHigh	*	*	*	InterGenic	*	*	*	*	*	*	*	*	CpG: 60	chr1	147520954	147521712	chr1	147520954	147521712	*	*	*	*	*	0	0	*	*	*	*	*	0	0	*	*	*	*	*
chr1	147532333	147533852	0.160183066361556	0.239676811409565	0.302325581395349	0.16	0.676468981721867	0.452376833780874	48	1.19473697921952e-05	HypoHigh	*	*	*	InterGenic	*	*	*	*	*	*	*	*	CpG: 16	chr1	147533662	147533875	chr1	147533662	147533852	*	*	*	*	*	0	0	*	*	*	*	*	0	0	*	*	*	*	*
chr1	147561665	147564842	0.085714285714286	-0.282154867348585	0.84	0.75	0.315220101533547	0.558912343350711	22	0.0324412323265551	HypoLow	*	*	*	InterGenic	*	*	*	*	*	*	*	*	*	*	*	*	*	0	0	*	*	*	*	*	0	0	*	*	*	*	*	0	0	*	*	*	*	*
chr1	147628120	147629591	0.181818181818182	0.218003298280581	0.4	0.125	0.561938569717677	0.306098611351497	20	0.00249068644578896	HypoHigh	*	*	*	InterGenic	*	*	*	*	*	*	*	*	*	*	*	*	*	0	0	*	*	*	*	*	0	0	*	*	*	*	*	0	0	*	*	*	*	*
chr1	147718236	147719004	0.288870851370851	-0.277982346845123	0.908902691511387	0.582750582750583	0.398413584252063	0.710026136122267	29	6.31675643764499e-06	HyperLow	*	*	*	InterGenic	*	*	*	*	*	*	*	*	CpG: 59	chr1	147718156	147718915	chr1	147718236	147718915	*	*	*	*	*	0	0	chr1-147718545:147719495	chr1	147718545	147719495	chr1	147718545	147719004	chr1-147718925:147719088	chr1	147718925	147719088	chr1
chr1	147801165	147801553	0.141447368421052	-0.361852532750957	0.934873949579832	0.763888888888889	0.228658419422619	0.554832593066821	17	0.00258304348078445	HypoLow	chr1	147801124	147801487	FirstExon	+	RP11-495P10.3	lincRNA	chr1	147801165	147801487	0.829896907216495	0.887052341597796	*	*	*	*	*	0	0	*	*	*	*	*	0	0	chr1-147801125:147801275	chr1	147801125	147801275	chr1	147801165	147801275	chr1-147801094:147801370	chr1	147801094	147801370	chr1
chr1	147801165	147801553	0.141447368421052	-0.361852532750957	0.934873949579832	0.763888888888889	0.228658419422619	0.554832593066821	17	0.00258304348078445	HypoLow	chr1	147801488	147801650	Intron1	+	RP11-495P10.3	lincRNA	chr1	147801488	147801553	0.167525773195876	0.401234567901235	*	*	*	*	*	0	0	*	*	*	*	*	0	0	chr1-147801500:147801735	chr1	147801500	147801735	chr1	147801500	147801553	*	*	*	*	*
chr1	147832887	147833488	0.163879598662207	-0.324843495280648	0.888888888888889	0.660287081339713	0.206949200038446	0.522478794595838	13	0.130195218936403	HypoLow	*	*	*	InterGenic	*	*	*	*	*	*	*	*	*	*	*	*	*	0	0	*	*	*	*	*	0	0	*	*	*	*	*	0	0	*	*	*	*	*
chr1	148901505	148902672	0.245197273290642	-0.0587083790498759	0.705882352941177	0.347826086956522	0.729818247780448	0.763409933285218	46	5.86306226932925e-08	HyperHigh	*	*	*	InterGenic	*	*	*	*	*	*	*	*	CpG: 122	chr1	148901724	148903203	chr1	148901724	148902672	*	*	*	*	*	0	0	chr1-148902285:148902655	chr1	148902285	148902655	chr1	148902285	148902655	chr1-148901762:148902292	chr1	148901762	148902292	chr1
chr1	149137096	149139370	0.311274509803921	0.332320575786631	0.4	0.05	0.635213020743189	0.259783279097362	50	3.09496593720919e-08	HyperHigh	*	*	*	InterGenic	*	*	*	*	*	*	*	*	CpG: 75	chr1	149137542	149138399	chr1	149137542	149138399	chr1:149138053-149138113	chr1	149138053	149138113	chr1	149138053	149138113	chr1-149139065:149139235	chr1	149139065	149139235	chr1	149139065	149139235	chr1-149137970:149138215	chr1	149137970	149138215	chr1
chr1	149145048	149147673	0.216666666666667	0	0.818181818181818	0.533333333333333	0.486382639009082	0.464049074554845	64	9.79691091629245e-05	HyperHigh	*	*	*	InterGenic	*	*	*	*	*	*	*	*	CpG: 33	chr1	149146208	149146697	chr1	149146208	149146697	*	*	*	*	*	0	0	chr1-149147585:149148315	chr1	149147585	149148315	chr1	149147585	149147673	chr1-149146402:149147046	chr1	149146402	149147046	chr1
chr1	149186099	149187391	0.30054945054945	0.0818285051142465	0.486842105263158	0.196172248803828	0.5583288460713	0.490496603978656	43	7.74010482715666e-05	HyperHigh	*	*	*	InterGenic	*	*	*	*	*	*	*	*	*	*	*	*	*	0	0	*	*	*	*	*	0	0	chr1-149186060:149186655	chr1	149186060	149186655	chr1	149186099	149186655	chr1-149186837:149187141	chr1	149186837	149187141	chr1
chr1	149192459	149194854	0.325396825396825	0.126525391748132	0.55050505050505	0.183333333333334	0.509442784577137	0.339820099171932	69	2.06543288280938e-09	HyperHigh	*	*	*	InterGenic	*	*	*	*	*	*	*	*	*	*	*	*	*	0	0	*	*	*	*	*	0	0	chr1-149194465:149194730	chr1	149194465	149194730	chr1	149194465	149194730	chr1-149194493:149195515	chr1	149194493	149195515	chr1
chr1	149222674	149224710	0.151152542865869	0.214299023842959	0.24	0.108116883116883	0.63027630844599	0.373622588381971	61	1.39408668506672e-08	HypoHigh	*	*	*	InterGenic	*	*	*	*	*	*	*	*	CpG: 22	chr1	149224358	149224642	chr1	149224358	149224642	chr1:149222771-149223127	chr1	149222771	149223127	chr1	149222771	149223127	chr1-149224140:149224670	chr1	149224140	149224670	chr1	149224140	149224670	chr1-149224699:149225063	chr1	149224699	149225063	chr1
chr1	149230499	149231353	0.208333333333333	0.232949217556218	0.357142857142857	0.125	0.622544630323737	0.323650198151556	32	5.77145637006227e-07	HyperHigh	chr1	149229715	149230715	Promoter	+	RP11-403I13.5	lincRNA	chr1	149230499	149230715	0.252927400468384	0.216	*	*	*	*	*	0	0	*	*	*	*	*	0	0	chr1-149230365:149230935	chr1	149230365	149230935	chr1	149230499	149230715	chr1-149230571:149230638	chr1	149230571	149230638	chr1
chr1	149230499	149231353	0.208333333333333	0.232949217556218	0.357142857142857	0.125	0.622544630323737	0.323650198151556	32	5.77145637006227e-07	HyperHigh	chr1	149230716	149230773	FirstExon	+	RP11-403I13.5	lincRNA	chr1	149230716	149230773	0.0667447306791569	1	CpG: 30	chr1	149230771	149231197	chr1	149230771	149230773	*	*	*	*	*	0	0	chr1-149230365:149230935	chr1	149230365	149230935	chr1	149230716	149230773	chr1-149230568:149230958	chr1	149230568	149230958	chr1
chr1	149230499	149231353	0.208333333333333	0.232949217556218	0.357142857142857	0.125	0.622544630323737	0.323650198151556	32	5.77145637006227e-07	HyperHigh	chr1	149230774	149231539	Intron1	+	RP11-403I13.5	lincRNA	chr1	149230774	149231353	0.677985948477752	0.756862745098039	CpG: 30	chr1	149230771	149231197	chr1	149230774	149231197	*	*	*	*	*	0	0	chr1-149231345:149231510	chr1	149231345	149231510	chr1	149231345	149231353	chr1-149231232:149231756	chr1	149231232	149231756	chr1
chr1	149286208	149287941	0.366268894455225	-0.0434926276586565	0.752192982456141	0.351982263954095	0.606630115358133	0.681577875150565	57	1.94360139918612e-16	HyperHigh	chr1	149284899	149286754	Intron1	+	RP11-403I13.7	lincRNA	chr1	149286208	149286754	0.315060588574726	0.294339622641509	*	*	*	*	*	0	0	*	*	*	*	*	0	0	chr1-149286620:149286895	chr1	149286620	149286895	chr1	149286620	149286754	chr1-149286334:149286663	chr1	149286334	149286663	chr1
chr1	149286208	149287941	0.366268894455225	-0.0434926276586565	0.752192982456141	0.351982263954095	0.606630115358133	0.681577875150565	57	1.94360139918612e-16	HyperHigh	chr1	149286755	149286975	LastExon	+	RP11-403I13.7	lincRNA	chr1	149286755	149286975	0.126947489901904	1	CpG: 67	chr1	149286812	149287773	chr1	149286812	149286975	*	*	*	*	*	0	0	chr1-149286960:149287135	chr1	149286960	149287135	chr1	149286960	149286975	chr1-149286237:149287332	chr1	149286237	149287332	chr1
chr1	149286208	149287941	0.366268894455225	-0.0434926276586565	0.752192982456141	0.351982263954095	0.606630115358133	0.681577875150565	57	1.94360139918612e-16	HyperHigh	chr1	149286450	149287450	Promoter	+	RP11-403I13.8	lincRNA	chr1	149286450	149287450	0.577034045008656	1	CpG: 67	chr1	149286812	149287773	chr1	149286812	149287450	*	*	*	*	*	0	0	chr1-149287165:149287775	chr1	149287165	149287775	chr1	149287165	149287450	chr1-149287255:149287360	chr1	149287255	149287360	chr1
chr1	149286208	149287941	0.366268894455225	-0.0434926276586565	0.752192982456141	0.351982263954095	0.606630115358133	0.681577875150565	57	1.94360139918612e-16	HyperHigh	chr1	149287451	149288896	FirstExon	+	RP11-403I13.8	lincRNA	chr1	149287451	149287941	0.282746682054241	0.339100346020761	CpG: 67	chr1	149286812	149287773	chr1	149287451	149287773	*	*	*	*	*	0	0	chr1-149287165:149287775	chr1	149287165	149287775	chr1	149287451	149287775	*	*	*	*	*
chr1	149671709	149673487	0.362887596899225	-0.055923422051059	0.746268656716418	0.34	0.640393230649166	0.694987500240385	60	2.40533720815599e-16	HyperHigh	chr1	149649235	149700915	Intron2	-	RP11-353N4.5	lincRNA	chr1	149671709	149673487	1	0.0344040247678019	CpG: 94	chr1	149671991	149673412	chr1	149671991	149673412	*	*	*	*	*	0	0	chr1-149672780:149673335	chr1	149672780	149673335	chr1	149672780	149673335	chr1-149673139:149673298	chr1	149673139	149673298	chr1
chr1	149671709	149673487	0.362887596899225	-0.055923422051059	0.746268656716418	0.34	0.640393230649166	0.694987500240385	60	2.40533720815599e-16	HyperHigh	chr1	149671996	149672996	Promoter	+	RP11-353N4.4	lincRNA	chr1	149671996	149672996	0.562429696287964	1	CpG: 94	chr1	149671991	149673412	chr1	149671996	149672996	*	*	*	*	*	0	0	chr1-149672780:149673335	chr1	149672780	149673335	chr1	149672780	149672996	chr1-149672938:149673322	chr1	149672938	149673322	chr1
chr1	149671709	149673487	0.362887596899225	-0.055923422051059	0.746268656716418	0.34	0.640393230649166	0.694987500240385	60	2.40533720815599e-16	HyperHigh	chr1	149672997	149674442	FirstExon	+	RP11-353N4.4	lincRNA	chr1	149672997	149673487	0.275590551181102	0.339100346020761	CpG: 94	chr1	149671991	149673412	chr1	149672997	149673412	*	*	*	*	*	0	0	chr1-149672780:149673335	chr1	149672780	149673335	chr1	149672997	149673335	chr1-149673139:149673298	chr1	149673139	149673298	chr1
chr1	149782714	149785543	0.204232804232804	0.128224156665178	0.555555555555556	0.311111111111111	0.647215173971843	0.491482397420138	76	9.84799314632547e-10	HyperHigh	chr1	149775518	149783501	Intron1	-	HIST2H2BF	protein_coding	chr1	149782714	149783501	0.27819017320608	0.0985844920455969	*	*	*	*	*	0	0	*	*	*	*	*	0	0	chr1-149783140:149783315	chr1	149783140	149783315	chr1	149783140	149783315	chr1-149783490:149784214	chr1	149783490	149784214	chr1
chr1	149782714	149785543	0.204232804232804	0.128224156665178	0.555555555555556	0.311111111111111	0.647215173971843	0.491482397420138	76	9.84799314632547e-10	HyperHigh	chr1	149783502	149783893	FirstExon	-	HIST2H2BF	protein_coding	chr1	149783502	149783893	0.138211382113821	1	CpG: 45	chr1	149783524	149784024	chr1	149783524	149783893	*	*	*	*	*	0	0	chr1-149783760:149784195	chr1	149783760	149784195	chr1	149783760	149783893	chr1-149783883:149784293	chr1	149783883	149784293	chr1
chr1	149782714	149785543	0.204232804232804	0.128224156665178	0.555555555555556	0.311111111111111	0.647215173971843	0.491482397420138	76	9.84799314632547e-10	HyperHigh	chr1	149783894	149784894	Promoter	-	HIST2H2BF	protein_coding	chr1	149783894	149784894	0.353481795687522	1	CpG: 58	chr1	149784592	149785212	chr1	149784592	149784894	*	*	*	*	*	0	0	chr1-149784720:149784890	chr1	149784720	149784890	chr1	149784720	149784890	chr1-149784774:149785375	chr1	149784774	149785375	chr1
chr1	149782714	149785543	0.204232804232804	0.128224156665178	0.555555555555556	0.311111111111111	0.647215173971843	0.491482397420138	76	9.84799314632547e-10	HyperHigh	chr1	149754817	149783237	Intron1	-	RP11-196G18.21	antisense	chr1	149782714	149783237	0.184870979144574	0.018402533427164	*	*	*	*	*	0	0	*	*	*	*	*	0	0	chr1-149783140:149783315	chr1	149783140	149783315	chr1	149783140	149783237	chr1-149783223:149783346	chr1	149783223	149783346	chr1
chr1	149782714	149785543	0.204232804232804	0.128224156665178	0.555555555555556	0.311111111111111	0.647215173971843	0.491482397420138	76	9.84799314632547e-10	HyperHigh	chr1	149783238	149783312	FirstExon	-	RP11-196G18.21	antisense	chr1	149783238	149783312	0.0261576528808766	1	*	*	*	*	*	0	0	*	*	*	*	*	0	0	chr1-149783140:149783315	chr1	149783140	149783315	chr1	149783238	149783312	chr1-149783223:149783346	chr1	149783223	149783346	chr1
chr1	149782714	149785543	0.204232804232804	0.128224156665178	0.555555555555556	0.311111111111111	0.647215173971843	0.491482397420138	76	9.84799314632547e-10	HyperHigh	chr1	149783313	149784313	Promoter	-	RP11-196G18.21	antisense	chr1	149783313	149784313	0.353481795687522	1	CpG: 45	chr1	149783524	149784024	chr1	149783524	149784024	*	*	*	*	*	0	0	chr1-149783760:149784195	chr1	149783760	149784195	chr1	149783760	149784195	chr1-149784072:149784336	chr1	149784072	149784336	chr1
chr1	149782714	149785543	0.204232804232804	0.128224156665178	0.555555555555556	0.311111111111111	0.647215173971843	0.491482397420138	76	9.84799314632547e-10	HyperHigh	chr1	149784826	149785236	FirstExon	-	HIST2H3D	protein_coding	chr1	149784826	149785236	0.144927536231884	1	CpG: 58	chr1	149784592	149785212	chr1	149784826	149785212	*	*	*	*	*	0	0	chr1-149785140:149785375	chr1	149785140	149785375	chr1	149785140	149785236	chr1-149785219:149785635	chr1	149785219	149785635	chr1
chr1	149782714	149785543	0.204232804232804	0.128224156665178	0.555555555555556	0.311111111111111	0.647215173971843	0.491482397420138	76	9.84799314632547e-10	HyperHigh	chr1	149785237	149786237	Promoter	-	HIST2H3D	protein_coding	chr1	149785237	149785543	0.108165429480382	0.306	*	*	*	*	*	0	0	*	*	*	*	*	0	0	chr1-149785400:149785570	chr1	149785400	149785570	chr1	149785400	149785543	chr1-149785298:149785742	chr1	149785298	149785742	chr1
chr1	149801930	149803036	-0.186234817813765	-0.308025053040873	0.125	0.357142857142857	0.216674140549451	0.576524652837874	18	0.0432982396863	HypoLow	chr1	149802876	149804109	FirstExon	-	RP11-196G18.23	antisense	chr1	149802876	149803036	0.144665461121157	0.129764801297648	*	*	*	*	*	0	0	*	*	*	*	*	0	0	*	*	*	*	*	0	0	*	*	*	*	*
chr1	149833781	149835013	-0.145705128205128	-0.29276620212008	0.0769230769230769	0.298571428571428	0.299931122214197	0.519000910475704	19	0.0785966092502248	HypoLow	*	*	*	InterGenic	*	*	*	*	*	*	*	*	*	*	*	*	*	0	0	*	*	*	*	*	0	0	*	*	*	*	*	0	0	*	*	*	*	*
chr1	149901980	149903852	0.157894736842105	-0.286915006130813	0.875	0.642857142857143	0.216674140549451	0.449529298670807	22	0.00801165459793727	HypoLow	chr1	149901809	149902256	Intron12	-	MTMR11	protein_coding	chr1	149901980	149902256	0.147435897435897	0.61744966442953	*	*	*	*	*	0	0	*	*	*	*	*	0	0	chr1-149901900:149902230	chr1	149901900	149902230	chr1	149901980	149902230	chr1-149901719:149902163	chr1	149901719	149902163	chr1
chr1	149901980	149903852	0.157894736842105	-0.286915006130813	0.875	0.642857142857143	0.216674140549451	0.449529298670807	22	0.00801165459793727	HypoLow	chr1	149902257	149902857	Exon12	-	MTMR11	protein_coding	chr1	149902257	149902857	0.320512820512821	1	*	*	*	*	*	0	0	*	*	*	*	*	0	0	*	*	*	*	*	0	0	chr1-149902729:149903233	chr1	149902729	149903233	chr1
chr1	149901980	149903852	0.157894736842105	-0.286915006130813	0.875	0.642857142857143	0.216674140549451	0.449529298670807	22	0.00801165459793727	HypoLow	chr1	149902858	149903835	Intron11	-	MTMR11	protein_coding	chr1	149902858	149903835	0.521901709401709	1	*	*	*	*	*	0	0	*	*	*	*	*	0	0	chr1-149903360:149903650	chr1	149903360	149903650	chr1	149903360	149903650	chr1-149903300:149903744	chr1	149903300	149903744	chr1
chr1	149901980	149903852	0.157894736842105	-0.286915006130813	0.875	0.642857142857143	0.216674140549451	0.449529298670807	22	0.00801165459793727	HypoLow	chr1	149903836	149903906	Exon11	-	MTMR11	protein_coding	chr1	149903836	149903852	0.00854700854700855	0.228571428571429	*	*	*	*	*	0	0	*	*	*	*	*	0	0	*	*	*	*	*	0	0	chr1-149903296:149903882	chr1	149903296	149903882	chr1
chr1	150254999	150255540	0.294819624819624	-0.0282996479092455	0.666666666666667	0.25	0.593345033506218	0.555746626092837	19	0.0124047901814546	HyperHigh	chr1	150254953	150255028	FirstExon	+	C1orf51	protein_coding	chr1	150254999	150255028	0.0536044362292052	0.386666666666667	*	*	*	*	*	0	0	*	*	*	*	*	0	0	*	*	*	*	*	0	0	chr1-150255027:150255471	chr1	150255027	150255471	chr1
chr1	150254999	150255540	0.294819624819624	-0.0282996479092455	0.666666666666667	0.25	0.593345033506218	0.555746626092837	19	0.0124047901814546	HyperHigh	chr1	150255029	150255617	Intron1	+	C1orf51	protein_coding	chr1	150255029	150255540	0.944547134935305	0.869047619047619	*	*	*	*	*	0	0	*	*	*	*	*	0	0	chr1-150255065:150255475	chr1	150255065	150255475	chr1	150255065	150255475	chr1-150255228:150255468	chr1	150255228	150255468	chr1
chr1	150544943	150549120	0.145299145299145	-0.311562822591633	1	0.764705882352941	0.181188147733199	0.431820614746107	36	7.20278769097376e-05	HypoLow	chr1	150547032	150549967	LastExon	-	MCL1	protein_coding	chr1	150547032	150549120	0.499880296863778	0.711413969335605	*	*	*	*	*	0	0	*	*	*	*	*	0	0	chr1-150548920:150549075	chr1	150548920	150549075	chr1	150548920	150549075	chr1-150549093:150550107	chr1	150549093	150550107	chr1
chr1	150849685	150850158	-0.342857142857143	0.162732440857526	0.375	0.555555555555556	0.486382639009082	0.440726448505556	10	0.0099729012146532	HypoHigh	chr1	150849245	150850245	Promoter	-	ARNT	protein_coding	chr1	150849685	150850158	1	0.473	*	*	*	*	*	0	0	*	*	*	*	*	0	0	chr1-150849680:150850095	chr1	150849680	150850095	chr1	150849685	150850095	chr1-150850059:150850335	chr1	150850059	150850335	chr1
chr1	150875621	150878231	-0.083333333333333	0.270426041486378	0.916666666666667	1	0.38003855950487	0	26	0.00530759452212611	HypoHigh	*	*	*	InterGenic	*	*	*	*	*	*	*	*	*	*	*	*	*	0	0	*	*	*	*	*	0	0	chr1-150877185:150877335	chr1	150877185	150877335	chr1	150877185	150877335	chr1-150877146:150877582	chr1	150877146	150877582	chr1
chr1	151775132	151777204	0.111111111111111	-0.216674140549451	1	0.875	0.306098611351497	0.459594497828725	14	0.0937851744744804	HypoLow	chr1	151772740	151775193	LastExon	-	LINGO4	protein_coding	chr1	151775132	151775193	0.0294401544401544	0.0248675091724419	*	*	*	*	*	0	0	*	*	*	*	*	0	0	chr1-151775145:151775295	chr1	151775145	151775295	chr1	151775145	151775193	*	*	*	*	*
chr1	151775132	151777204	0.111111111111111	-0.216674140549451	1	0.875	0.306098611351497	0.459594497828725	14	0.0937851744744804	HypoLow	chr1	151775194	151777705	Intron1	-	LINGO4	protein_coding	chr1	151775194	151777204	0.97007722007722	0.800477897252091	*	*	*	*	*	0	0	*	*	*	*	*	0	0	chr1-151776705:151777115	chr1	151776705	151777115	chr1	151776705	151777115	chr1-151775749:151775932	chr1	151775749	151775932	chr1
chr1	152080050	152082718	0.204166666666666	-0.099042726880471	0.825757575757575	0.55050505050505	0.470900026852397	0.597493750120193	91	8.53189407988069e-09	HyperHigh	chr1	152078793	152085554	LastExon	-	TCHH	protein_coding	chr1	152080050	152082718	1	0.394616181038308	CpG: 131	chr1	152079997	152081705	chr1	152080050	152081705	*	*	*	*	*	0	0	chr1-152082405:152082615	chr1	152082405	152082615	chr1	152082405	152082615	chr1-152082714:152082967	chr1	152082714	152082967	chr1
chr1	152277552	152281104	-0.055555555555556	0.210166368880302	0.846153846153846	0.916666666666667	0.315457645328481	0.181188147733199	48	0.00704192094979827	HypoHigh	chr1	152274310	152287381	Intron2	+	FLG-AS1	antisense	chr1	152277552	152281104	1	0.271746614643103	*	*	*	*	*	0	0	*	*	*	*	*	0	0	*	*	*	*	*	0	0	chr1-152280488:152280898	chr1	152280488	152280898	chr1
chr1	152277552	152281104	-0.055555555555556	0.210166368880302	0.846153846153846	0.916666666666667	0.315457645328481	0.181188147733199	48	0.00704192094979827	HypoHigh	chr1	152274651	152287223	LastExon	-	FLG	protein_coding	chr1	152277552	152281104	1	0.282532612153993	*	*	*	*	*	0	0	*	*	*	*	*	0	0	*	*	*	*	*	0	0	chr1-152280488:152280898	chr1	152280488	152280898	chr1
chr1	152581066	152594838	-0.0954545454545455	0.219448181385836	0.833333333333333	1	0.40007733694479	0.167581604814326	51	3.26513483645452e-05	HypoHigh	chr1	152585286	152586286	Promoter	+	LCE3B	protein_coding	chr1	152585286	152586286	0.0726110949753122	1	*	*	*	*	*	0	0	*	*	*	*	*	0	0	chr1-152585725:152585875	chr1	152585725	152585875	chr1	152585725	152585875	*	*	*	*	*
chr1	152581066	152594838	-0.0954545454545455	0.219448181385836	0.833333333333333	1	0.40007733694479	0.167581604814326	51	3.26513483645452e-05	HypoHigh	chr1	152586287	152586574	FirstExon	+	LCE3B	protein_coding	chr1	152586287	152586574	0.0208393842579146	1	*	*	*	*	*	0	0	*	*	*	*	*	0	0	*	*	*	*	*	0	0	*	*	*	*	*
chr1	152618698	152625161	-0.094068392907402	0.349861297284575	0.800653594771242	0.941558441558442	0.529945136898708	0.18920620363032	19	0.00666345807911618	HypoHigh	*	*	*	InterGenic	*	*	*	*	*	*	*	*	*	*	*	*	*	0	0	*	*	*	*	*	0	0	chr1-152619705:152619855	chr1	152619705	152619855	chr1	152619705	152619855	chr1-152621687:152622097	chr1	152621687	152622097	chr1
chr1	153669881	153671090	0.217171717171717	-0.132153292574445	0.764705882352941	0.533333333333333	0.432931646898466	0.552580908834963	24	6.2670252660561e-06	HyperLow	*	*	*	InterGenic	*	*	*	*	*	*	*	*	*	*	*	*	*	0	0	chr1:153670755-153671012	chr1	153670755	153671012	chr1	153670755	153671012	chr1-153670385:153671195	chr1	153670385	153671195	chr1	153670385	153671090	chr1-153671040:153671290	chr1	153671040	153671290	chr1
chr1	154113468	154120612	-0.058578431372549	0.204664341370577	0.914855072463769	1	0.310464061370116	0.137938950101211	75	9.5942149175611e-08	HypoHigh	chr1	154112429	154113906	Intron4	-	NUP210L	protein_coding	chr1	154113468	154113906	0.0613101903695409	0.296547054840894	*	*	*	*	*	0	0	*	*	*	*	*	0	0	chr1-154113820:154114070	chr1	154113820	154114070	chr1	154113820	154113906	chr1-154113840:154114130	chr1	154113840	154114130	chr1
chr1	154113468	154120612	-0.058578431372549	0.204664341370577	0.914855072463769	1	0.310464061370116	0.137938950101211	75	9.5942149175611e-08	HypoHigh	chr1	154113907	154114000	Exon4	-	NUP210L	protein_coding	chr1	154113907	154114000	0.0130179171332587	1	*	*	*	*	*	0	0	*	*	*	*	*	0	0	chr1-154113820:154114070	chr1	154113820	154114070	chr1	154113907	154114000	chr1-154113840:154114130	chr1	154113840	154114130	chr1
chr1	154113468	154120612	-0.058578431372549	0.204664341370577	0.914855072463769	1	0.310464061370116	0.137938950101211	75	9.5942149175611e-08	HypoHigh	chr1	154114001	154115921	Intron3	-	NUP210L	protein_coding	chr1	154114001	154115921	0.268756998880179	1	*	*	*	*	*	0	0	*	*	*	*	*	0	0	chr1-154115885:154116035	chr1	154115885	154116035	chr1	154115885	154115921	chr1-154115133:154115550	chr1	154115133	154115550	chr1
chr1	154113468	154120612	-0.058578431372549	0.204664341370577	0.914855072463769	1	0.310464061370116	0.137938950101211	75	9.5942149175611e-08	HypoHigh	chr1	154115922	154116053	Exon3	-	NUP210L	protein_coding	chr1	154115922	154116053	0.0183370660694289	1	*	*	*	*	*	0	0	*	*	*	*	*	0	0	chr1-154115885:154116035	chr1	154115885	154116035	chr1	154115922	154116035	*	*	*	*	*
chr1	154113468	154120612	-0.058578431372549	0.204664341370577	0.914855072463769	1	0.310464061370116	0.137938950101211	75	9.5942149175611e-08	HypoHigh	chr1	154116054	154125211	Intron2	-	NUP210L	protein_coding	chr1	154116054	154120612	0.638017917133259	0.497761275526919	*	*	*	*	*	0	0	*	*	*	*	*	0	0	chr1-154120440:154120590	chr1	154120440	154120590	chr1	154120440	154120590	chr1-154120035:154120318	chr1	154120035	154120318	chr1
chr1	154475041	154475561	0.274038461538462	0.142414687352872	0.5625	0.115384615384615	0.563130582247696	0.484616899350486	22	0.00323441217589158	HyperHigh	chr1	154474590	154475590	Promoter	-	SHE	protein_coding	chr1	154475041	154475561	1	0.52	CpG: 192	chr1	154474107	154475699	chr1	154475041	154475561	*	*	*	*	*	0	0	chr1-154475280:154475755	chr1	154475280	154475755	chr1	154475280	154475561	chr1-154475522:154475722	chr1	154475522	154475722	chr1
chr1	154475041	154475561	0.274038461538462	0.142414687352872	0.5625	0.115384615384615	0.563130582247696	0.484616899350486	22	0.00323441217589158	HyperHigh	chr1	154474695	154475505	FirstExon	+	TDRD10	protein_coding	chr1	154475041	154475505	0.892307692307692	0.57283950617284	CpG: 192	chr1	154474107	154475699	chr1	154475041	154475505	*	*	*	*	*	0	0	chr1-154475280:154475755	chr1	154475280	154475755	chr1	154475280	154475505	chr1-154475239:154475979	chr1	154475239	154475979	chr1
chr1	154475041	154475561	0.274038461538462	0.142414687352872	0.5625	0.115384615384615	0.563130582247696	0.484616899350486	22	0.00323441217589158	HyperHigh	chr1	154475506	154479352	Intron1	+	TDRD10	protein_coding	chr1	154475506	154475561	0.105769230769231	0.0143005720228809	CpG: 192	chr1	154474107	154475699	chr1	154475506	154475561	*	*	*	*	*	0	0	chr1-154475280:154475755	chr1	154475280	154475755	chr1	154475506	154475561	chr1-154475522:154475722	chr1	154475522	154475722	chr1
chr1	154832232	154833211	0.373015873015873	-0.253504772444212	0.857142857142857	0.333333333333333	0.385593216482346	0.5	10	0.0170610510755134	HyperLow	chr1	154794661	154841507	Intron1	-	KCNN3	protein_coding	chr1	154832232	154833211	1	0.0208982623916663	*	*	*	*	*	0	0	chr1:154832851-154833092	chr1	154832851	154833092	chr1	154832851	154833092	chr1-154832240:154833270	chr1	154832240	154833270	chr1	154832240	154833211	chr1-154833044:154833320	chr1	154833044	154833320	chr1
chr1	155098696	155099486	0.233506493506494	0.142134556123612	0.5	0.26969696969697	0.540450871204341	0.433310884007718	31	0.000380787138852483	HyperHigh	chr1	155098935	155099935	Promoter	+	EFNA1	protein_coding	chr1	155098935	155099486	0.69746835443038	0.551	CpG: 152	chr1	155098434	155100451	chr1	155098935	155099486	*	*	*	*	*	0	0	chr1-155098480:155100830	chr1	155098480	155100830	chr1	155098935	155099486	chr1-155099455:155100278	chr1	155099455	155100278	chr1
chr1	155146204	155148022	0.296703296703297	0.179914643045438	0.455555555555555	0.0714285714285714	0.467745183122889	0.270426041486378	39	4.0379838643487e-05	HyperHigh	chr1	155145810	155146810	Promoter	-	KRTCAP2	protein_coding	chr1	155146204	155146810	0.333333333333333	0.606	*	*	*	*	*	0	0	*	*	*	*	*	0	0	chr1-155146485:155147515	chr1	155146485	155147515	chr1	155146485	155146810	chr1-155146718:155147269	chr1	155146718	155147269	chr1
chr1	155146204	155148022	0.296703296703297	0.179914643045438	0.455555555555555	0.0714285714285714	0.467745183122889	0.270426041486378	39	4.0379838643487e-05	HyperHigh	chr1	155145951	155159700	Intron1	-	RP11-201K10.3	protein_coding	chr1	155146204	155148022	1	0.132227798385337	CpG: 20	chr1	155147185	155147444	chr1	155147185	155147444	*	*	*	*	*	0	0	chr1-155147545:155147995	chr1	155147545	155147995	chr1	155147545	155147995	chr1-155147546:155148257	chr1	155147546	155148257	chr1
chr1	155146204	155148022	0.296703296703297	0.179914643045438	0.455555555555555	0.0714285714285714	0.467745183122889	0.270426041486378	39	4.0379838643487e-05	HyperHigh	chr1	155145384	155146384	Promoter	+	TRIM46	protein_coding	chr1	155146204	155146384	0.099009900990099	0.18	*	*	*	*	*	0	0	*	*	*	*	*	0	0	chr1-155146005:155146475	chr1	155146005	155146475	chr1	155146204	155146384	chr1-155146294:155146604	chr1	155146294	155146604	chr1
chr1	155146204	155148022	0.296703296703297	0.179914643045438	0.455555555555555	0.0714285714285714	0.467745183122889	0.270426041486378	39	4.0379838643487e-05	HyperHigh	chr1	155146385	155146515	FirstExon	+	TRIM46	protein_coding	chr1	155146385	155146515	0.0715071507150715	1	*	*	*	*	*	0	0	*	*	*	*	*	0	0	chr1-155146485:155147515	chr1	155146485	155147515	chr1	155146485	155146515	chr1-155146481:155146861	chr1	155146481	155146861	chr1
chr1	155146204	155148022	0.296703296703297	0.179914643045438	0.455555555555555	0.0714285714285714	0.467745183122889	0.270426041486378	39	4.0379838643487e-05	HyperHigh	chr1	155146516	155147861	Intron1	+	TRIM46	protein_coding	chr1	155146516	155147861	0.73982398239824	1	CpG: 20	chr1	155147185	155147444	chr1	155147185	155147444	*	*	*	*	*	0	0	chr1-155147545:155147995	chr1	155147545	155147995	chr1	155147545	155147861	chr1-155147546:155148257	chr1	155147546	155148257	chr1
chr1	155146204	155148022	0.296703296703297	0.179914643045438	0.455555555555555	0.0714285714285714	0.467745183122889	0.270426041486378	39	4.0379838643487e-05	HyperHigh	chr1	155147862	155148123	Exon2	+	TRIM46	protein_coding	chr1	155147862	155148022	0.088008800880088	0.613026819923372	*	*	*	*	*	0	0	*	*	*	*	*	0	0	chr1-155147545:155147995	chr1	155147545	155147995	chr1	155147862	155147995	chr1-155147546:155148257	chr1	155147546	155148257	chr1
chr1	155217210	155217904	-0.293504901960784	0.28476117147048	0.516666666666666	0.897619047619048	0.528497923770348	0.240642698295787	9	0.0043972752412666	HypoHigh	chr1	155217008	155217746	LastExon	-	FAM189B	protein_coding	chr1	155217210	155217746	0.772334293948127	0.726287262872629	*	*	*	*	*	0	0	*	*	*	*	*	0	0	chr1-155217505:155217855	chr1	155217505	155217855	chr1	155217505	155217746	*	*	*	*	*
chr1	155217210	155217904	-0.293504901960784	0.28476117147048	0.516666666666666	0.897619047619048	0.528497923770348	0.240642698295787	9	0.0043972752412666	HypoHigh	chr1	155217747	155217840	Intron11	-	FAM189B	protein_coding	chr1	155217747	155217840	0.134005763688761	1	*	*	*	*	*	0	0	*	*	*	*	*	0	0	chr1-155217505:155217855	chr1	155217505	155217855	chr1	155217747	155217840	*	*	*	*	*
chr1	155217210	155217904	-0.293504901960784	0.28476117147048	0.516666666666666	0.897619047619048	0.528497923770348	0.240642698295787	9	0.0043972752412666	HypoHigh	chr1	155217841	155218094	Exon11	-	FAM189B	protein_coding	chr1	155217841	155217904	0.0907780979827089	0.24901185770751	*	*	*	*	*	0	0	*	*	*	*	*	0	0	chr1-155217505:155217855	chr1	155217505	155217855	chr1	155217841	155217855	*	*	*	*	*
chr1	155264584	155265437	0.23974358974359	0.154479800413227	0.408333333333334	0.155870445344129	0.569082963200077	0.375429150741329	29	0.000504844608042581	HyperHigh	chr1	155264544	155264906	Intron5	-	PKLR	protein_coding	chr1	155264584	155264906	0.377491207502931	0.889502762430939	CpG: 88	chr1	155264318	155265536	chr1	155264584	155264906	*	*	*	*	*	0	0	chr1-155264745:155264935	chr1	155264745	155264935	chr1	155264745	155264906	chr1-155264586:155265622	chr1	155264586	155265622	chr1
chr1	155264584	155265437	0.23974358974359	0.154479800413227	0.408333333333334	0.155870445344129	0.569082963200077	0.375429150741329	29	0.000504844608042581	HyperHigh	chr1	155264907	155265093	Exon5	-	PKLR	protein_coding	chr1	155264907	155265093	0.218053927315358	1	CpG: 88	chr1	155264318	155265536	chr1	155264907	155265093	*	*	*	*	*	0	0	chr1-155264940:155265555	chr1	155264940	155265555	chr1	155264940	155265093	chr1-155265053:155265663	chr1	155265053	155265663	chr1
chr1	155264584	155265437	0.23974358974359	0.154479800413227	0.408333333333334	0.155870445344129	0.569082963200077	0.375429150741329	29	0.000504844608042581	HyperHigh	chr1	155265094	155265227	Intron4	-	PKLR	protein_coding	chr1	155265094	155265227	0.155920281359906	1	CpG: 88	chr1	155264318	155265536	chr1	155265094	155265227	*	*	*	*	*	0	0	chr1-155264940:155265555	chr1	155264940	155265555	chr1	155265094	155265227	chr1-155265225:155265515	chr1	155265225	155265515	chr1
chr1	155264584	155265437	0.23974358974359	0.154479800413227	0.408333333333334	0.155870445344129	0.569082963200077	0.375429150741329	29	0.000504844608042581	HyperHigh	chr1	155265228	155265359	Exon4	-	PKLR	protein_coding	chr1	155265228	155265359	0.153575615474795	1	CpG: 88	chr1	155264318	155265536	chr1	155265228	155265359	*	*	*	*	*	0	0	chr1-155264940:155265555	chr1	155264940	155265555	chr1	155265228	155265359	chr1-155265239:155265729	chr1	155265239	155265729	chr1
chr1	155264584	155265437	0.23974358974359	0.154479800413227	0.408333333333334	0.155870445344129	0.569082963200077	0.375429150741329	29	0.000504844608042581	HyperHigh	chr1	155265360	155265455	Intron3	-	PKLR	protein_coding	chr1	155265360	155265437	0.0902696365767878	0.810526315789474	CpG: 88	chr1	155264318	155265536	chr1	155265360	155265437	*	*	*	*	*	0	0	chr1-155264940:155265555	chr1	155264940	155265555	chr1	155265360	155265437	chr1-155265239:155265729	chr1	155265239	155265729	chr1
chr1	155290171	155291204	0.230392156862745	0.223172156613603	0.5	0.133333333333333	0.523650198151556	0.330421420178476	30	0.000110022887168658	HyperHigh	chr1	155289720	155290199	Intron10	+	FDPS	protein_coding	chr1	155290171	155290199	0.0271055179090029	0.058455114822547	*	*	*	*	*	0	0	*	*	*	*	*	0	0	*	*	*	*	*	0	0	chr1-155290190:155290860	chr1	155290190	155290860	chr1
chr1	155290171	155291204	0.230392156862745	0.223172156613603	0.5	0.133333333333333	0.523650198151556	0.330421420178476	30	0.000110022887168658	HyperHigh	chr1	155290200	155290456	LastExon	+	FDPS	protein_coding	chr1	155290200	155290456	0.247821878025169	1	*	*	*	*	*	0	0	*	*	*	*	*	0	0	chr1-155290320:155290470	chr1	155290320	155290470	chr1	155290320	155290456	chr1-155290445:155290915	chr1	155290445	155290915	chr1
chr1	155290171	155291204	0.230392156862745	0.223172156613603	0.5	0.133333333333333	0.523650198151556	0.330421420178476	30	0.000110022887168658	HyperHigh	chr1	155289724	155291415	Intron3	-	RUSC1-AS1	antisense	chr1	155290171	155291204	1	0.610881135422827	CpG: 34	chr1	155290606	155291001	chr1	155290606	155291001	*	*	*	*	*	0	0	chr1-155290480:155292215	chr1	155290480	155292215	chr1	155290480	155291204	chr1-155291016:155291300	chr1	155291016	155291300	chr1
chr1	155290171	155291204	0.230392156862745	0.223172156613603	0.5	0.133333333333333	0.523650198151556	0.330421420178476	30	0.000110022887168658	HyperHigh	chr1	155289686	155290686	Promoter	+	RUSC1	protein_coding	chr1	155290171	155290686	0.498547918683446	0.515	CpG: 34	chr1	155290606	155291001	chr1	155290606	155290686	*	*	*	*	*	0	0	chr1-155290480:155292215	chr1	155290480	155292215	chr1	155290480	155290686	chr1-155290659:155291283	chr1	155290659	155291283	chr1
chr1	155290171	155291204	0.230392156862745	0.223172156613603	0.5	0.133333333333333	0.523650198151556	0.330421420178476	30	0.000110022887168658	HyperHigh	chr1	155290687	155290782	FirstExon	+	RUSC1	protein_coding	chr1	155290687	155290782	0.0919651500484027	1	CpG: 34	chr1	155290606	155291001	chr1	155290687	155290782	*	*	*	*	*	0	0	chr1-155290480:155292215	chr1	155290480	155292215	chr1	155290687	155290782	chr1-155290758:155291414	chr1	155290758	155291414	chr1
chr1	155290171	155291204	0.230392156862745	0.223172156613603	0.5	0.133333333333333	0.523650198151556	0.330421420178476	30	0.000110022887168658	HyperHigh	chr1	155290783	155291478	Intron1	+	RUSC1	protein_coding	chr1	155290783	155291204	0.407550822846079	0.605755395683453	CpG: 34	chr1	155290606	155291001	chr1	155290783	155291001	*	*	*	*	*	0	0	chr1-155290480:155292215	chr1	155290480	155292215	chr1	155290783	155291204	chr1-155291016:155291300	chr1	155291016	155291300	chr1
chr1	156130690	156131441	0.297023809523809	0.242790151328855	0.341666666666666	0.054093567251462	0.458581742531358	0.282996664590953	23	2.37327967370998e-08	HyperHigh	chr1	156130351	156130695	Intron7	+	SEMA4A	protein_coding	chr1	156130690	156130695	0.0066577896138482	0.0145348837209302	*	*	*	*	*	0	0	*	*	*	*	*	0	0	chr1-156130505:156131015	chr1	156130505	156131015	chr1	156130690	156130695	chr1-156130675:156130996	chr1	156130675	156130996	chr1
chr1	156130690	156131441	0.297023809523809	0.242790151328855	0.341666666666666	0.054093567251462	0.458581742531358	0.282996664590953	23	2.37327967370998e-08	HyperHigh	chr1	156130696	156130820	Exon8	+	SEMA4A	protein_coding	chr1	156130696	156130820	0.165113182423435	1	*	*	*	*	*	0	0	*	*	*	*	*	0	0	chr1-156130505:156131015	chr1	156130505	156131015	chr1	156130696	156130820	chr1-156130706:156131026	chr1	156130706	156131026	chr1
chr1	156130690	156131441	0.297023809523809	0.242790151328855	0.341666666666666	0.054093567251462	0.458581742531358	0.282996664590953	23	2.37327967370998e-08	HyperHigh	chr1	156130821	156131136	Intron8	+	SEMA4A	protein_coding	chr1	156130821	156131136	0.419440745672437	1	*	*	*	*	*	0	0	*	*	*	*	*	0	0	chr1-156130505:156131015	chr1	156130505	156131015	chr1	156130821	156131015	chr1-156131131:156131475	chr1	156131131	156131475	chr1
chr1	156130690	156131441	0.297023809523809	0.242790151328855	0.341666666666666	0.054093567251462	0.458581742531358	0.282996664590953	23	2.37327967370998e-08	HyperHigh	chr1	156131137	156131309	Exon9	+	SEMA4A	protein_coding	chr1	156131137	156131309	0.229027962716378	1	*	*	*	*	*	0	0	*	*	*	*	*	0	0	chr1-156131145:156131490	chr1	156131145	156131490	chr1	156131145	156131309	chr1-156131296:156131572	chr1	156131296	156131572	chr1
chr1	156130690	156131441	0.297023809523809	0.242790151328855	0.341666666666666	0.054093567251462	0.458581742531358	0.282996664590953	23	2.37327967370998e-08	HyperHigh	chr1	156131310	156132734	Intron9	+	SEMA4A	protein_coding	chr1	156131310	156131441	0.174434087882823	0.0919943820224719	*	*	*	*	*	0	0	*	*	*	*	*	0	0	chr1-156131145:156131490	chr1	156131145	156131490	chr1	156131310	156131441	chr1-156131434:156131874	chr1	156131434	156131874	chr1
chr1	156645048	156646447	0.0541666666666665	0.356992383737346	0.698529411764706	0.375	0.479797248914362	0.219089409872464	21	0.531093462525815	HypoHigh	chr1	156645008	156645132	Exon2	-	NES	protein_coding	chr1	156645048	156645132	0.0600428877769836	0.67741935483871	*	*	*	*	*	0	0	*	*	*	*	*	0	0	chr1-156644865:156645215	chr1	156644865	156645215	chr1	156645048	156645132	chr1-156645079:156645787	chr1	156645079	156645787	chr1
chr1	156645048	156646447	0.0541666666666665	0.356992383737346	0.698529411764706	0.375	0.479797248914362	0.219089409872464	21	0.531093462525815	HypoHigh	chr1	156645133	156646273	Intron1	-	NES	protein_coding	chr1	156645133	156646273	0.814867762687634	1	*	*	*	*	*	0	0	chr1:156645551-156645913	chr1	156645551	156645913	chr1	156645551	156645913	chr1-156645225:156647015	chr1	156645225	156647015	chr1	156645225	156646273	chr1-156646262:156647269	chr1	156646262	156647269	chr1
chr1	156645048	156646447	0.0541666666666665	0.356992383737346	0.698529411764706	0.375	0.479797248914362	0.219089409872464	21	0.531093462525815	HypoHigh	chr1	156646274	156647189	FirstExon	-	NES	protein_coding	chr1	156646274	156646447	0.123659756969264	0.189071038251366	CpG: 98	chr1	156646292	156647260	chr1	156646292	156646447	*	*	*	*	*	0	0	chr1-156645225:156647015	chr1	156645225	156647015	chr1	156646274	156646447	chr1-156646436:156647448	chr1	156646436	156647448	chr1
chr1	157475379	157476031	0.165686274509804	-0.302507984386568	0.916083916083916	0.614705882352941	0	0.484273177038261	13	0.0667943061571269	HypoLow	*	*	*	InterGenic	*	*	*	*	*	*	*	*	*	*	*	*	*	0	0	*	*	*	*	*	0	0	chr1-157475505:157475930	chr1	157475505	157475930	chr1	157475505	157475930	chr1-157475973:157476213	chr1	157475973	157476213	chr1
chr1	157931569	157933296	-0.109243697478992	0.233529191039593	0.714285714285714	0.928571428571429	0.507309364962454	0.306098611351497	18	0.041888475225494	HypoHigh	*	*	*	InterGenic	*	*	*	*	*	*	*	*	*	*	*	*	*	0	0	*	*	*	*	*	0	0	chr1-157933105:157933255	chr1	157933105	157933255	chr1	157933105	157933255	chr1-157933075:157934175	chr1	157933075	157934175	chr1
chr1	157948628	157949083	0.577372994652406	0.144306916434144	0.870833333333334	0.172697368421052	0.5	0.393345510859089	17	1.03174200851637e-05	HyperHigh	*	*	*	InterGenic	*	*	*	*	*	*	*	*	CpG: 28	chr1	157948720	157949053	chr1	157948720	157949053	*	*	*	*	*	0	0	chr1-157948345:157949235	chr1	157948345	157949235	chr1	157948628	157949083	chr1-157949039:157949298	chr1	157949039	157949298	chr1
chr1	158921637	158922583	-0.241071428571429	-0.197224259527442	0.0769230769230769	0.333333333333333	0.240642698295787	0.45698353148489	22	0.000209049623724377	HypoLow	chr1	158914833	158943436	Intron7	+	PYHIN1	protein_coding	chr1	158921637	158922583	1	0.033073453833514	*	*	*	*	*	0	0	*	*	*	*	*	0	0	chr1-158922305:158922515	chr1	158922305	158922515	chr1	158922305	158922515	chr1-158922269:158922493	chr1	158922269	158922493	chr1
chr1	159141426	159142512	0.0678733031674208	0.219842843399531	0.0839160839160839	0	0.350355034571981	0.127079315045022	31	0.000949631619113556	HypoHigh	chr1	159141399	159141643	FirstExon	+	CADM3	protein_coding	chr1	159141426	159141643	0.199815837937385	0.889344262295082	CpG: 46	chr1	159141202	159141718	chr1	159141426	159141643	*	*	*	*	*	0	0	chr1-159140485:159142315	chr1	159140485	159142315	chr1	159141426	159141643	chr1-159141597:159142422	chr1	159141597	159142422	chr1
chr1	159141426	159142512	0.0678733031674208	0.219842843399531	0.0839160839160839	0	0.350355034571981	0.127079315045022	31	0.000949631619113556	HypoHigh	chr1	159141644	159161725	Intron1	+	CADM3	protein_coding	chr1	159141644	159142512	0.79926335174954	0.0432249389970619	CpG: 46	chr1	159141202	159141718	chr1	159141644	159141718	*	*	*	*	*	0	0	chr1-159142445:159142715	chr1	159142445	159142715	chr1	159142445	159142512	chr1-159142509:159143289	chr1	159142509	159143289	chr1
chr1	159476363	159482495	0.111111111111111	-0.204481544576066	0.940972222222222	0.8	0.240642698295787	0.44563724344501	23	0.0194668633282814	HypoLow	*	*	*	InterGenic	*	*	*	*	*	*	*	*	*	*	*	*	*	0	0	*	*	*	*	*	0	0	chr1-159479560:159479850	chr1	159479560	159479850	chr1	159479560	159479850	chr1-159482336:159482756	chr1	159482336	159482756	chr1
chr1	160370950	160371329	0.261904761904762	0.042416556582469	0.7	0.307692307692308	0.552580908834963	0.612197222702993	14	0.00884283533208302	HyperHigh	chr1	160370660	160385437	Intron1	+	VANGL2	protein_coding	chr1	160370950	160371329	1	0.0256479664343236	*	*	*	*	*	0	0	*	*	*	*	*	0	0	chr1-160370705:160371755	chr1	160370705	160371755	chr1	160370950	160371329	chr1-160371326:160371970	chr1	160371326	160371970	chr1
chr1	161057878	161059428	0.205853174603175	-0.244311306156513	0.873015873015873	0.654761904761905	0.306098611351497	0.519531595432119	19	0.0242855012424441	HyperLow	chr1	161049740	161059007	Intron1	-	PVRL4	protein_coding	chr1	161057878	161059007	0.728387096774194	0.121830149994605	*	*	*	*	*	0	0	*	*	*	*	*	0	0	chr1-161058825:161058995	chr1	161058825	161058995	chr1	161058825	161058995	chr1-161058914:161059888	chr1	161058914	161059888	chr1
chr1	161057878	161059428	0.205853174603175	-0.244311306156513	0.873015873015873	0.654761904761905	0.306098611351497	0.519531595432119	19	0.0242855012424441	HyperLow	chr1	161059008	161059389	FirstExon	-	PVRL4	protein_coding	chr1	161059008	161059389	0.245806451612903	1	*	*	*	*	*	0	0	*	*	*	*	*	0	0	chr1-161059025:161059535	chr1	161059025	161059535	chr1	161059025	161059389	chr1-161059262:161059486	chr1	161059262	161059486	chr1
chr1	161057878	161059428	0.205853174603175	-0.244311306156513	0.873015873015873	0.654761904761905	0.306098611351497	0.519531595432119	19	0.0242855012424441	HyperLow	chr1	161059390	161060390	Promoter	-	PVRL4	protein_coding	chr1	161059390	161059428	0.0245161290322581	0.038	*	*	*	*	*	0	0	*	*	*	*	*	0	0	chr1-161059025:161059535	chr1	161059025	161059535	chr1	161059390	161059428	chr1-161059262:161059486	chr1	161059262	161059486	chr1
chr1	161391574	161392674	0.272727272727273	0.0419381945646371	0.5	0.181818181818182	0.5	0.408131481801995	28	0.000177628882524151	HyperHigh	*	*	*	InterGenic	*	*	*	*	*	*	*	*	*	*	*	*	*	0	0	*	*	*	*	*	0	0	chr1-161391660:161392075	chr1	161391660	161392075	chr1	161391660	161392075	chr1-161391907:161392317	chr1	161391907	161392317	chr1
chr1	161409738	161413314	0.203106021169529	0.108314576550092	0.442105263157895	0.219512195121951	0.760196096010328	0.68610523176474	110	3.87633618655312e-13	HyperHigh	*	*	*	InterGenic	*	*	*	*	*	*	*	*	CpG: 2067	chr1	161410142	161442503	chr1	161410142	161413314	*	*	*	*	*	0	0	chr1-161410120:161410575	chr1	161410120	161410575	chr1	161410120	161410575	chr1-161412392:161412836	chr1	161412392	161412836	chr1
chr1	161424025	161428118	0.200554126753389	0.159916696944582	0.446153846153846	0.202952029520295	0.799639414954263	0.659343955370223	126	1.29983691182088e-13	HyperHigh	*	*	*	InterGenic	*	*	*	*	*	*	*	*	CpG: 2067	chr1	161410142	161442503	chr1	161424025	161428118	*	*	*	*	*	0	0	chr1-161427045:161427235	chr1	161427045	161427235	chr1	161427045	161427235	chr1-161427336:161427482	chr1	161427336	161427482	chr1
chr1	161431436	161435478	0.209754750837433	0.161288796553857	0.4424341298268	0.198124791874792	0.782247657027583	0.634379097095394	125	5.06002953416205e-14	HyperHigh	*	*	*	InterGenic	*	*	*	*	*	*	*	*	CpG: 2067	chr1	161410142	161442503	chr1	161431436	161435478	*	*	*	*	*	0	0	*	*	*	*	*	0	0	*	*	*	*	*
chr1	161438816	161441483	0.212173558489325	0.272103383577688	0.34422268907563	0.11001100110011	0.745575069474677	0.46126305287037	77	8.16802331531641e-14	HyperHigh	*	*	*	InterGenic	*	*	*	*	*	*	*	*	CpG: 2067	chr1	161410142	161442503	chr1	161438816	161441483	*	*	*	*	*	0	0	*	*	*	*	*	0	0	*	*	*	*	*
chr1	161495068	161495583	0.268162393162394	-0.159120272384256	0.714166666666667	0.459139784946237	0.446263072363596	0.605383344747851	17	0.00029521483339433	HyperLow	chr1	161487928	161571029	Intron3	+	RP11-25K21.6	processed_transcript	chr1	161495068	161495583	1	0.00619727801109493	CpG: 124	chr1	161494024	161495356	chr1	161495068	161495356	*	*	*	*	*	0	0	chr1-161495240:161495415	chr1	161495240	161495415	chr1	161495240	161495415	chr1-161495012:161495576	chr1	161495012	161495576	chr1
chr1	161495068	161495583	0.268162393162394	-0.159120272384256	0.714166666666667	0.459139784946237	0.446263072363596	0.605383344747851	17	0.00029521483339433	HyperLow	chr1	161494036	161496681	FirstExon	+	HSPA6	protein_coding	chr1	161495068	161495583	1	0.194706994328922	CpG: 124	chr1	161494024	161495356	chr1	161495068	161495356	*	*	*	*	*	0	0	chr1-161495240:161495415	chr1	161495240	161495415	chr1	161495240	161495415	chr1-161495012:161495576	chr1	161495012	161495576	chr1
chr1	161575204	161576980	0.35	-0.119450564543408	0.9375	0.555555555555556	0.326622918883718	0.431945463097055	54	4.89313475050027e-12	HyperLow	*	*	*	InterGenic	*	*	*	*	*	*	*	*	CpG: 129	chr1	161575534	161576908	chr1	161575534	161576908	*	*	*	*	*	0	0	chr1-161576905:161577135	chr1	161576905	161577135	chr1	161576905	161576980	chr1-161576271:161576769	chr1	161576271	161576769	chr1
chr1	161586242	161586707	0.111111111111111	-0.245308783543011	1	0.846153846153846	0.254734835502873	0.458426455179793	16	0.00712903241384038	HypoLow	*	*	*	InterGenic	*	*	*	*	*	*	*	*	*	*	*	*	*	0	0	*	*	*	*	*	0	0	chr1-161586185:161586335	chr1	161586185	161586335	chr1	161586242	161586335	chr1-161586072:161586626	chr1	161586072	161586626	chr1
chr1	163410027	163411750	-0.105263157894737	0.304553436966562	0.888544891640867	0.976190476190476	0.442980760708237	0.061872054440146	11	0.00404019430230565	HypoHigh	*	*	*	InterGenic	*	*	*	*	*	*	*	*	*	*	*	*	*	0	0	*	*	*	*	*	0	0	chr1-163410000:163410170	chr1	163410000	163410170	chr1	163410027	163410170	chr1-163410086:163410302	chr1	163410086	163410302	chr1
chr1	164289442	164290922	0.241071428571428	-0.056160932361034	0.666666666666667	0.345238095238095	0.45698353148489	0.499153141372325	27	0.00133030945947292	HyperHigh	*	*	*	InterGenic	*	*	*	*	*	*	*	*	CpG: 34	chr1	164290515	164290767	chr1	164290515	164290767	chr1:164289956-164290255	chr1	164289956	164290255	chr1	164289956	164290255	chr1-164290525:164291035	chr1	164290525	164291035	chr1	164290525	164290922	chr1-164290534:164290914	chr1	164290534	164290914	chr1
chr1	165086733	165087405	0.18939393939394	0.250325833477565	0.272727272727273	0.0526315789473684	0.516264980231799	0.240642698295787	14	0.0134793068737054	HypoHigh	*	*	*	InterGenic	*	*	*	*	*	*	*	*	CpG: 29	chr1	165086756	165087026	chr1	165086756	165087026	*	*	*	*	*	0	0	chr1-165087325:165087475	chr1	165087325	165087475	chr1	165087325	165087405	chr1-165086777:165087107	chr1	165086777	165087107	chr1
chr1	165204318	165205313	0.181818181818182	0.328808909576947	0.25	0	0.517032723669088	0.0991574163064299	30	2.2590900661722e-05	HypoHigh	chr1	165183051	165218644	Intron4	-	LMX1A	protein_coding	chr1	165204318	165205313	1	0.0279549349591212	CpG: 77	chr1	165204501	165205507	chr1	165204501	165205313	chr1:165205285-165205518	chr1	165205285	165205518	chr1	165205285	165205313	chr1-165204640:165205715	chr1	165204640	165205715	chr1	165204640	165205313	chr1-165205301:165205440	chr1	165205301	165205440	chr1
chr1	165574615	165576181	0.368421052631579	-0.306098611351497	0.833333333333333	0.533333333333333	0.287706856188877	0.45698353148489	14	0.00399954035070483	HyperLow	chr1	165567922	165574832	Intron1	+	RP11-306I1.2	lincRNA	chr1	165574615	165574832	0.138569604086845	0.0314037626628075	*	*	*	*	*	0	0	*	*	*	*	*	0	0	*	*	*	*	*	0	0	chr1-165574650:165575094	chr1	165574650	165575094	chr1
chr1	165574615	165576181	0.368421052631579	-0.306098611351497	0.833333333333333	0.533333333333333	0.287706856188877	0.45698353148489	14	0.00399954035070483	HyperLow	chr1	165574833	165574925	Exon2	+	RP11-306I1.2	lincRNA	chr1	165574833	165574925	0.0587484035759898	1	*	*	*	*	*	0	0	*	*	*	*	*	0	0	*	*	*	*	*	0	0	chr1-165574650:165575094	chr1	165574650	165575094	chr1
chr1	165574615	165576181	0.368421052631579	-0.306098611351497	0.833333333333333	0.533333333333333	0.287706856188877	0.45698353148489	14	0.00399954035070483	HyperLow	chr1	165574926	165590754	Intron2	+	RP11-306I1.2	lincRNA	chr1	165574926	165576181	0.801404853128991	0.0792898660601466	*	*	*	*	*	0	0	*	*	*	*	*	0	0	chr1-165575980:165576170	chr1	165575980	165576170	chr1	165575980	165576170	chr1-165574650:165575094	chr1	165574650	165575094	chr1
chr1	166133874	166135616	0.0837320574162676	0.284135059549826	0.125	0	0.45698353148489	0.103181143050108	48	9.12005647368797e-05	HypoHigh	chr1	166040001	166135222	Intron2	-	FAM78B	protein_coding	chr1	166133874	166135222	0.773823191733639	0.0141565410991273	CpG: 188	chr1	166134258	166136448	chr1	166134258	166135222	*	*	*	*	*	0	0	chr1-166134185:166135495	chr1	166134185	166135495	chr1	166134185	166135222	chr1-166135211:166135368	chr1	166135211	166135368	chr1
chr1	166133874	166135616	0.0837320574162676	0.284135059549826	0.125	0	0.45698353148489	0.103181143050108	48	9.12005647368797e-05	HypoHigh	chr1	166135223	166135956	Exon2	-	FAM78B	protein_coding	chr1	166135223	166135616	0.225602755453502	0.536152796725784	CpG: 188	chr1	166134258	166136448	chr1	166135223	166135616	*	*	*	*	*	0	0	chr1-166135505:166135835	chr1	166135505	166135835	chr1	166135505	166135616	chr1-166135590:166135872	chr1	166135590	166135872	chr1
chr1	166133874	166135616	0.0837320574162676	0.284135059549826	0.125	0	0.45698353148489	0.103181143050108	48	9.12005647368797e-05	HypoHigh	chr1	166117197	166134026	Intron1	-	RP11-9L18.3	sense_intronic	chr1	166133874	166134026	0.087256027554535	0.00903202804682393	*	*	*	*	*	0	0	*	*	*	*	*	0	0	chr1-166133965:166134155	chr1	166133965	166134155	chr1	166133965	166134026	chr1-166134007:166134677	chr1	166134007	166134677	chr1
chr1	166133874	166135616	0.0837320574162676	0.284135059549826	0.125	0	0.45698353148489	0.103181143050108	48	9.12005647368797e-05	HypoHigh	chr1	166134027	166134332	FirstExon	-	RP11-9L18.3	sense_intronic	chr1	166134027	166134332	0.175086107921929	1	CpG: 188	chr1	166134258	166136448	chr1	166134258	166134332	*	*	*	*	*	0	0	chr1-166134185:166135495	chr1	166134185	166135495	chr1	166134185	166134332	chr1-166134329:166135028	chr1	166134329	166135028	chr1
chr1	166133874	166135616	0.0837320574162676	0.284135059549826	0.125	0	0.45698353148489	0.103181143050108	48	9.12005647368797e-05	HypoHigh	chr1	166134333	166135333	Promoter	-	RP11-9L18.3	sense_intronic	chr1	166134333	166135333	0.574052812858783	1	CpG: 188	chr1	166134258	166136448	chr1	166134333	166135333	*	*	*	*	*	0	0	chr1-166134185:166135495	chr1	166134185	166135495	chr1	166134333	166135333	chr1-166135211:166135368	chr1	166135211	166135368	chr1
chr1	167023240	167025039	0.146853146853147	-0.218546354076522	0.8125	0.647058823529412	0.306098611351497	0.5	26	0.0342645407217073	HypoLow	chr1	167022004	167027543	Intron1	+	RP11-102C16.3	antisense	chr1	167023240	167025039	1	0.324787867846182	*	*	*	*	*	0	0	*	*	*	*	*	0	0	chr1-167024965:167025115	chr1	167024965	167025115	chr1	167024965	167025039	chr1-167024798:167025162	chr1	167024798	167025162	chr1
chr1	167023240	167025039	0.146853146853147	-0.218546354076522	0.8125	0.647058823529412	0.306098611351497	0.5	26	0.0342645407217073	HypoLow	chr1	167022073	167023703	LastExon	-	GPA33	protein_coding	chr1	167023240	167023703	0.257365202890495	0.284049079754601	*	*	*	*	*	0	0	*	*	*	*	*	0	0	chr1-167023465:167024095	chr1	167023465	167024095	chr1	167023465	167023703	chr1-167023456:167023656	chr1	167023456	167023656	chr1
chr1	167023240	167025039	0.146853146853147	-0.218546354076522	0.8125	0.647058823529412	0.306098611351497	0.5	26	0.0342645407217073	HypoLow	chr1	167023704	167024212	Intron6	-	GPA33	protein_coding	chr1	167023704	167024212	0.282379099499722	1	*	*	*	*	*	0	0	*	*	*	*	*	0	0	chr1-167024125:167024730	chr1	167024125	167024730	chr1	167024125	167024212	*	*	*	*	*
chr1	167023240	167025039	0.146853146853147	-0.218546354076522	0.8125	0.647058823529412	0.306098611351497	0.5	26	0.0342645407217073	HypoLow	chr1	167024213	167024348	Exon6	-	GPA33	protein_coding	chr1	167024213	167024348	0.075041689827682	1	*	*	*	*	*	0	0	*	*	*	*	*	0	0	chr1-167024125:167024730	chr1	167024125	167024730	chr1	167024213	167024348	*	*	*	*	*
chr1	167023240	167025039	0.146853146853147	-0.218546354076522	0.8125	0.647058823529412	0.306098611351497	0.5	26	0.0342645407217073	HypoLow	chr1	167024349	167024966	Intron5	-	GPA33	protein_coding	chr1	167024349	167024966	0.342968315730962	1	*	*	*	*	*	0	0	*	*	*	*	*	0	0	chr1-167024965:167025115	chr1	167024965	167025115	chr1	167024965	167024966	chr1-167024798:167025162	chr1	167024798	167025162	chr1
chr1	167023240	167025039	0.146853146853147	-0.218546354076522	0.8125	0.647058823529412	0.306098611351497	0.5	26	0.0342645407217073	HypoLow	chr1	167024967	167025086	Exon5	-	GPA33	protein_coding	chr1	167024967	167025039	0.0400222345747638	0.605042016806723	*	*	*	*	*	0	0	*	*	*	*	*	0	0	chr1-167024965:167025115	chr1	167024965	167025115	chr1	167024967	167025039	chr1-167024798:167025162	chr1	167024798	167025162	chr1
chr1	167063667	167065025	0.231648785996612	-0.0528469162751335	0.602564102564102	0.32051282051282	0.471683085246986	0.486412660994809	13	0.0485585981941423	HyperHigh	chr1	167063432	167064070	Intron1	+	DUSP27	protein_coding	chr1	167063667	167064070	0.296759941089838	0.63166144200627	*	*	*	*	*	0	0	*	*	*	*	*	0	0	chr1-167063885:167064190	chr1	167063885	167064190	chr1	167063885	167064070	chr1-167064000:167064148	chr1	167064000	167064148	chr1
chr1	167063667	167065025	0.231648785996612	-0.0528469162751335	0.602564102564102	0.32051282051282	0.471683085246986	0.486412660994809	13	0.0485585981941423	HyperHigh	chr1	167064071	167064196	Exon2	+	DUSP27	protein_coding	chr1	167064071	167064196	0.0920471281296024	1	*	*	*	*	*	0	0	*	*	*	*	*	0	0	chr1-167063885:167064190	chr1	167063885	167064190	chr1	167064071	167064190	chr1-167064000:167064148	chr1	167064000	167064148	chr1
chr1	167063667	167065025	0.231648785996612	-0.0528469162751335	0.602564102564102	0.32051282051282	0.471683085246986	0.486412660994809	13	0.0485585981941423	HyperHigh	chr1	167064197	167082946	Intron2	+	DUSP27	protein_coding	chr1	167064197	167065025	0.609720176730486	0.0441623553256174	*	*	*	*	*	0	0	*	*	*	*	*	0	0	chr1-167064585:167064850	chr1	167064585	167064850	chr1	167064585	167064850	chr1-167064794:167065170	chr1	167064794	167065170	chr1
chr1	169152809	169154022	-0.222222222222222	0.197224259527442	0.777777777777778	1	0.434663795218027	0.140891822770406	9	0.0284409718135993	HypoHigh	chr1	169138793	169199955	Intron10	-	NME7	protein_coding	chr1	169152809	169154022	1	0.0198325757823485	*	*	*	*	*	0	0	*	*	*	*	*	0	0	*	*	*	*	*	0	0	*	*	*	*	*
chr1	169305179	169305655	-0.308065123282515	0.194523258264554	0.535885167464115	0.884199134199134	0.550444144970008	0.318614760510809	11	0.000379127227011751	HypoHigh	chr1	169293739	169336945	Intron1	-	NME7	protein_coding	chr1	169305179	169305655	1	0.0110169883812433	*	*	*	*	*	0	0	*	*	*	*	*	0	0	*	*	*	*	*	0	0	chr1-169305469:169306005	chr1	169305469	169306005	chr1
chr1	175474186	175474651	0.337662337662338	-0.220990247205619	0.857142857142857	0.454545454545455	0.382944951426972	0.576524652837874	18	0.000197512507498462	HyperLow	chr1	175375914	175497404	Intron2	-	TNR	protein_coding	chr1	175474186	175474651	1	0.00382747551238785	*	*	*	*	*	0	0	*	*	*	*	*	0	0	chr1-175474340:175474655	chr1	175474340	175474655	chr1	175474340	175474651	*	*	*	*	*
chr1	175535494	175538936	-0.125	0.201756803693773	0.818181818181818	0.9375	0.45698353148489	0.307309364962454	28	4.7272558423971e-05	HypoHigh	chr1	175497506	175712361	Intron1	-	TNR	protein_coding	chr1	175535494	175538936	1	0.0160201065835098	*	*	*	*	*	0	0	*	*	*	*	*	0	0	chr1-175538880:175539030	chr1	175538880	175539030	chr1	175538880	175538936	chr1-175538516:175538880	chr1	175538516	175538880	chr1
chr1	175568376	175568793	0.360468478889532	0.245823691541718	0.677083333333333	0.0789473684210527	0.597765278018163	0.398903398564701	17	0.000235654321120914	HyperHigh	chr1	175497506	175712361	Intron1	-	TNR	protein_coding	chr1	175568376	175568793	1	0.00194084382490517	CpG: 42	chr1	175568376	175568808	chr1	175568376	175568793	chr1:175568488-175568642	chr1	175568488	175568642	chr1	175568488	175568642	chr1-175568685:175568855	chr1	175568685	175568855	chr1	175568685	175568793	chr1-175568540:175568920	chr1	175568540	175568920	chr1
chr1	175819402	175820501	0.116666666666667	-0.357590519143435	1	0.809090909090909	0.234447501961038	0.5499676887311	9	0.0212156673448841	HypoLow	*	*	*	InterGenic	*	*	*	*	*	*	*	*	*	*	*	*	*	0	0	*	*	*	*	*	0	0	*	*	*	*	*	0	0	*	*	*	*	*
chr1	177133329	177133927	0.115131578947369	0.357506480909715	0.142857142857143	0.0454545454545455	0.509823088725046	0.181188147733199	23	0.000761263098712789	HypoHigh	chr1	177030402	177133529	Intron1	-	ASTN1	protein_coding	chr1	177133329	177133529	0.334448160535117	0.00193935632763486	CpG: 44	chr1	177133392	177133846	chr1	177133392	177133529	*	*	*	*	*	0	0	chr1-177133445:177134235	chr1	177133445	177134235	chr1	177133445	177133529	chr1-177133451:177134165	chr1	177133451	177134165	chr1
chr1	177133329	177133927	0.115131578947369	0.357506480909715	0.142857142857143	0.0454545454545455	0.509823088725046	0.181188147733199	23	0.000761263098712789	HypoHigh	chr1	177133530	177134003	FirstExon	-	ASTN1	protein_coding	chr1	177133530	177133927	0.663879598662207	0.839323467230444	CpG: 44	chr1	177133392	177133846	chr1	177133530	177133846	*	*	*	*	*	0	0	chr1-177133445:177134235	chr1	177133445	177134235	chr1	177133530	177133927	chr1-177133880:177134150	chr1	177133880	177134150	chr1
chr1	177139875	177141303	0.263636363636364	0.219209668940963	0.384615384615385	0.0833333333333333	0.528320833573719	0.353759374819711	28	4.4210387913335e-05	HyperHigh	chr1	177139632	177140632	Promoter	+	BRINP2	protein_coding	chr1	177139875	177140632	0.530112044817927	0.757	CpG: 23	chr1	177140120	177140323	chr1	177140120	177140323	*	*	*	*	*	0	0	chr1-177140405:177140655	chr1	177140405	177140655	chr1	177140405	177140632	chr1-177140149:177141008	chr1	177140149	177141008	chr1
chr1	177139875	177141303	0.263636363636364	0.219209668940963	0.384615384615385	0.0833333333333333	0.528320833573719	0.353759374819711	28	4.4210387913335e-05	HyperHigh	chr1	177140633	177140868	FirstExon	+	BRINP2	protein_coding	chr1	177140633	177140868	0.164565826330532	1	*	*	*	*	*	0	0	*	*	*	*	*	0	0	chr1-177140685:177141255	chr1	177140685	177141255	chr1	177140685	177140868	chr1-177140149:177141008	chr1	177140149	177141008	chr1
chr1	177139875	177141303	0.263636363636364	0.219209668940963	0.384615384615385	0.0833333333333333	0.528320833573719	0.353759374819711	28	4.4210387913335e-05	HyperHigh	chr1	177140869	177198936	Intron1	+	BRINP2	protein_coding	chr1	177140869	177141303	0.303921568627451	0.00747412471799817	*	*	*	*	*	0	0	*	*	*	*	*	0	0	chr1-177140685:177141255	chr1	177140685	177141255	chr1	177140869	177141255	chr1-177140959:177141398	chr1	177140959	177141398	chr1
chr1	178455799	178456220	0.444889162561576	-0.259559913339611	0.861904761904762	0.421182266009853	0.452259883149013	0.645140396315812	15	0.000521380252090187	HyperLow	*	*	*	InterGenic	*	*	*	*	*	*	*	*	CpG: 49	chr1	178455799	178456286	chr1	178455799	178456220	*	*	*	*	*	0	0	chr1-178454405:178456195	chr1	178454405	178456195	chr1	178455799	178456195	chr1-178455874:178456364	chr1	178455874	178456364	chr1
chr1	179544642	179545667	0.235294117647059	0.307373085488635	0.444444444444444	0.0833333333333333	0.63943194468483	0.289464243003454	32	1.75471306614713e-05	HyperHigh	chr1	179533929	179544725	Intron1	-	NPHS2	protein_coding	chr1	179544642	179544725	0.0809756097560976	0.0076880326046684	CpG: 66	chr1	179544720	179545307	chr1	179544720	179544725	*	*	*	*	*	0	0	chr1-179544580:179545455	chr1	179544580	179545455	chr1	179544642	179544725	chr1-179544655:179545572	chr1	179544655	179545572	chr1
chr1	179544642	179545667	0.235294117647059	0.307373085488635	0.444444444444444	0.0833333333333333	0.63943194468483	0.289464243003454	32	1.75471306614713e-05	HyperHigh	chr1	179544726	179545087	FirstExon	-	NPHS2	protein_coding	chr1	179544726	179545087	0.352195121951219	1	CpG: 66	chr1	179544720	179545307	chr1	179544726	179545087	*	*	*	*	*	0	0	chr1-179544580:179545455	chr1	179544580	179545455	chr1	179544726	179545087	chr1-179544777:179545033	chr1	179544777	179545033	chr1
chr1	179544642	179545667	0.235294117647059	0.307373085488635	0.444444444444444	0.0833333333333333	0.63943194468483	0.289464243003454	32	1.75471306614713e-05	HyperHigh	chr1	179545088	179546088	Promoter	-	NPHS2	protein_coding	chr1	179545088	179545667	0.564878048780488	0.579	CpG: 66	chr1	179544720	179545307	chr1	179545088	179545307	*	*	*	*	*	0	0	chr1-179545665:179546115	chr1	179545665	179546115	chr1	179545665	179545667	chr1-179544766:179545891	chr1	179544766	179545891	chr1
chr1	179554827	179555898	0.287110232762406	0.369853665955337	0.491666666666667	0.042572463768116	0.665461971120689	0.26718941283777	19	0.000276671749986971	HyperHigh	*	*	*	InterGenic	*	*	*	*	*	*	*	*	CpG: 38	chr1	179555401	179555770	chr1	179555401	179555770	chr1:179555221-179555646	chr1	179555221	179555646	chr1	179555221	179555646	chr1-179555220:179556175	chr1	179555220	179556175	chr1	179555220	179555898	chr1-179555598:179556042	chr1	179555598	179556042	chr1
chr1	179560668	179561693	0.349624060150376	0.031453645923478	0.684210526315789	0.25	0.518885569154274	0.524805809046819	32	1.07645390961242e-05	HyperHigh	chr1	179559747	179560747	Promoter	+	TDRD5	protein_coding	chr1	179560668	179560747	0.0770731707317073	0.079	*	*	*	*	*	0	0	*	*	*	*	*	0	0	chr1-179560645:179561515	chr1	179560645	179561515	chr1	179560668	179560747	chr1-179560744:179561060	chr1	179560744	179561060	chr1
chr1	179560668	179561693	0.349624060150376	0.031453645923478	0.684210526315789	0.25	0.518885569154274	0.524805809046819	32	1.07645390961242e-05	HyperHigh	chr1	179560748	179560800	FirstExon	+	TDRD5	protein_coding	chr1	179560748	179560800	0.0507317073170732	1	CpG: 74	chr1	179560751	179561596	chr1	179560751	179560800	*	*	*	*	*	0	0	chr1-179560645:179561515	chr1	179560645	179561515	chr1	179560748	179560800	chr1-179560791:179561008	chr1	179560791	179561008	chr1
chr1	179560668	179561693	0.349624060150376	0.031453645923478	0.684210526315789	0.25	0.518885569154274	0.524805809046819	32	1.07645390961242e-05	HyperHigh	chr1	179560801	179561444	Intron1	+	TDRD5	protein_coding	chr1	179560801	179561444	0.627317073170732	1	CpG: 74	chr1	179560751	179561596	chr1	179560801	179561444	*	*	*	*	*	0	0	chr1-179560645:179561515	chr1	179560645	179561515	chr1	179560801	179561444	chr1-179561234:179561524	chr1	179561234	179561524	chr1
chr1	179560668	179561693	0.349624060150376	0.031453645923478	0.684210526315789	0.25	0.518885569154274	0.524805809046819	32	1.07645390961242e-05	HyperHigh	chr1	179561445	179561982	Exon2	+	TDRD5	protein_coding	chr1	179561445	179561693	0.241951219512195	0.461824953445065	CpG: 74	chr1	179560751	179561596	chr1	179561445	179561596	*	*	*	*	*	0	0	chr1-179561685:179562015	chr1	179561685	179562015	chr1	179561685	179561693	chr1-179561234:179561524	chr1	179561234	179561524	chr1
chr1	179711711	179713703	0.380952380952381	0.44562859848128	0.523809523809524	0.0476190476190476	0.707309364962454	0.228012811879681	64	2.05789286292919e-16	HyperHigh	chr1	179711490	179711832	LastExon	+	RP11-12M5.1	lincRNA	chr1	179711711	179711832	0.0607429718875502	0.353801169590643	*	*	*	*	*	0	0	*	*	*	*	*	0	0	chr1-179711725:179713695	chr1	179711725	179713695	chr1	179711725	179711832	chr1-179711829:179712423	chr1	179711829	179712423	chr1
chr1	179711711	179713703	0.380952380952381	0.44562859848128	0.523809523809524	0.0476190476190476	0.707309364962454	0.228012811879681	64	2.05789286292919e-16	HyperHigh	chr1	179711297	179712297	Promoter	+	FAM163A	protein_coding	chr1	179711711	179712297	0.294176706827309	0.586	CpG: 199	chr1	179711947	179713951	chr1	179711947	179712297	*	*	*	*	*	0	0	chr1-179711725:179713695	chr1	179711725	179713695	chr1	179711725	179712297	chr1-179712273:179712657	chr1	179712273	179712657	chr1
chr1	179711711	179713703	0.380952380952381	0.44562859848128	0.523809523809524	0.0476190476190476	0.707309364962454	0.228012811879681	64	2.05789286292919e-16	HyperHigh	chr1	179712298	179712558	FirstExon	+	FAM163A	protein_coding	chr1	179712298	179712558	0.130522088353414	1	CpG: 199	chr1	179711947	179713951	chr1	179712298	179712558	*	*	*	*	*	0	0	chr1-179711725:179713695	chr1	179711725	179713695	chr1	179712298	179712558	chr1-179712273:179712657	chr1	179712273	179712657	chr1
chr1	179711711	179713703	0.380952380952381	0.44562859848128	0.523809523809524	0.0476190476190476	0.707309364962454	0.228012811879681	64	2.05789286292919e-16	HyperHigh	chr1	179712559	179776932	Intron1	+	FAM163A	protein_coding	chr1	179712559	179713703	0.57429718875502	0.0177714259083777	CpG: 199	chr1	179711947	179713951	chr1	179712559	179713703	*	*	*	*	*	0	0	chr1-179711725:179713695	chr1	179711725	179713695	chr1	179712559	179713695	chr1-179713693:179714880	chr1	179713693	179714880	chr1
chr1	180196765	180198432	0.194322344322344	0.227105725029428	0.303846153846154	0.0666666666666667	0.528320833573719	0.270426041486378	33	0.000411203967785195	HypoHigh	chr1	180198420	180199420	Promoter	+	LHX4	protein_coding	chr1	180198420	180198432	0.00719856028794241	0.012	CpG: 459	chr1	180198119	180204975	chr1	180198420	180198432	*	*	*	*	*	0	0	chr1-180197725:180198535	chr1	180197725	180198535	chr1	180198420	180198432	chr1-180198426:180198916	chr1	180198426	180198916	chr1
chr1	180201316	180202879	0.311274509803921	0.212981998920801	0.4375	0.0869565217391304	0.612197222702993	0.398057911418971	36	2.67206418785633e-07	HyperHigh	chr1	180199741	180217419	Intron1	+	LHX4	protein_coding	chr1	180201316	180202879	1	0.0884149790700305	CpG: 459	chr1	180198119	180204975	chr1	180201316	180202879	*	*	*	*	*	0	0	chr1-180199205:180202955	chr1	180199205	180202955	chr1	180201316	180202879	chr1-180202412:180202672	chr1	180202412	180202672	chr1
chr1	181030714	181034644	0.0492424242424242	-0.206379082507902	0.909090909090909	0.652173913043478	0.197224259527442	0.307309364962454	42	0.166769071799637	HypoLow	chr1	181024361	181031074	LastExon	+	MR1	protein_coding	chr1	181030714	181031074	0.0916030534351145	0.0536272903321913	*	*	*	*	*	0	0	*	*	*	*	*	0	0	chr1-181030605:181031035	chr1	181030605	181031035	chr1	181030714	181031035	chr1-181031066:181031386	chr1	181031066	181031386	chr1
chr1	181451124	181453277	0.312693498452013	0.051336631613914	0.545454545454545	0.15	0.5	0.455438219012133	50	2.25981174812699e-07	HyperHigh	chr1	181451715	181452715	Promoter	+	CACNA1E	protein_coding	chr1	181451715	181452715	0.464468183929401	1	CpG: 32	chr1	181452706	181453073	chr1	181452706	181452715	chr1:181451162-181451821	chr1	181451162	181451821	chr1	181451715	181451821	chr1-181452705:181453335	chr1	181452705	181453335	chr1	181452705	181452715	chr1-181452612:181453142	chr1	181452612	181453142	chr1
chr1	181451124	181453277	0.312693498452013	0.051336631613914	0.545454545454545	0.15	0.5	0.455438219012133	50	2.25981174812699e-07	HyperHigh	chr1	181452716	181453146	FirstExon	+	CACNA1E	protein_coding	chr1	181452716	181453146	0.199721319089642	1	CpG: 32	chr1	181452706	181453073	chr1	181452716	181453073	*	*	*	*	*	0	0	chr1-181452705:181453335	chr1	181452705	181453335	chr1	181452716	181453146	chr1-181452612:181453142	chr1	181452612	181453142	chr1
chr1	181451124	181453277	0.312693498452013	0.051336631613914	0.545454545454545	0.15	0.5	0.455438219012133	50	2.25981174812699e-07	HyperHigh	chr1	181453147	181479612	Intron1	+	CACNA1E	protein_coding	chr1	181453147	181453277	0.0603808639108221	0.0049121481201587	*	*	*	*	*	0	0	*	*	*	*	*	0	0	chr1-181452705:181453335	chr1	181452705	181453335	chr1	181453147	181453277	chr1-181451411:181453454	chr1	181451411	181453454	chr1
chr1	181619989	181626866	0.055555555555556	-0.213820237889193	0.933333333333333	0.894736842105263	0.197224259527442	0.432931646898466	44	0.00997777145057263	HypoLow	chr1	181549913	181620473	Intron6	+	CACNA1E	protein_coding	chr1	181619989	181620473	0.0703795259560855	0.006859410430839	*	*	*	*	*	0	0	*	*	*	*	*	0	0	*	*	*	*	*	0	0	*	*	*	*	*
chr1	181619989	181626866	0.055555555555556	-0.213820237889193	0.933333333333333	0.894736842105263	0.197224259527442	0.432931646898466	44	0.00997777145057263	HypoLow	chr1	181620474	181620577	Exon7	+	CACNA1E	protein_coding	chr1	181620474	181620577	0.0149774611022248	1	*	*	*	*	*	0	0	*	*	*	*	*	0	0	chr1-181620485:181620730	chr1	181620485	181620730	chr1	181620485	181620577	chr1-181620510:181620754	chr1	181620510	181620754	chr1
chr1	181619989	181626866	0.055555555555556	-0.213820237889193	0.933333333333333	0.894736842105263	0.197224259527442	0.432931646898466	44	0.00997777145057263	HypoLow	chr1	181620578	181680089	Intron7	+	CACNA1E	protein_coding	chr1	181620578	181626866	0.914352188454268	0.105661138276957	*	*	*	*	*	0	0	*	*	*	*	*	0	0	chr1-181626305:181626455	chr1	181626305	181626455	chr1	181626305	181626455	chr1-181625702:181625972	chr1	181625702	181625972	chr1
chr1	182025728	182026506	0.336257309941521	0.212863188245238	0.478260869565217	0.111111111111111	0.635213020743189	0.329393612334892	28	1.10689757368934e-06	HyperHigh	chr1	182023705	182027208	LastExon	-	ZNF648	protein_coding	chr1	182025728	182026506	1	0.222095346845561	CpG: 91	chr1	182025604	182026511	chr1	182025728	182026506	*	*	*	*	*	0	0	chr1-182025545:182026555	chr1	182025545	182026555	chr1	182025728	182026506	chr1-182025846:182026162	chr1	182025846	182026162	chr1
chr1	182569111	182570019	-0.238095238095238	0.106349131373529	0.318181818181818	0.615384615384615	0.528320833573719	0.417209722462608	20	0.03909340754839	HypoHigh	chr1	182567758	182569648	LastExon	-	RGS16	protein_coding	chr1	182569111	182569648	0.591409691629956	0.284126984126984	*	*	*	*	*	0	0	*	*	*	*	*	0	0	chr1-182569560:182569855	chr1	182569560	182569855	chr1	182569560	182569648	chr1-182568723:182569143	chr1	182568723	182569143	chr1
chr1	182569111	182570019	-0.238095238095238	0.106349131373529	0.318181818181818	0.615384615384615	0.528320833573719	0.417209722462608	20	0.03909340754839	HypoHigh	chr1	182569649	182571100	Intron4	-	RGS16	protein_coding	chr1	182569649	182570019	0.407488986784141	0.25499655410062	*	*	*	*	*	0	0	*	*	*	*	*	0	0	chr1-182569885:182570115	chr1	182569885	182570115	chr1	182569885	182570019	chr1-182570018:182571238	chr1	182570018	182571238	chr1
chr1	182884227	182888859	0.055555555555556	-0.270426041486378	1	0.842105263157895	0.167752778258549	0.432931646898466	26	0.0119147117162814	HypoLow	chr1	182874785	182898781	Intron5	-	SHCBP1L	protein_coding	chr1	182884227	182888859	1	0.193032172028671	*	*	*	*	*	0	0	*	*	*	*	*	0	0	chr1-182886640:182886830	chr1	182886640	182886830	chr1	182886640	182886830	chr1-182886614:182886998	chr1	182886614	182886998	chr1
chr1	182921685	182922136	0.259740259740259	-0.234313684728136	0.857142857142857	0.571428571428571	0.440726448505556	0.607010652711274	16	0.000769700611249004	HyperLow	chr1	182920599	182921863	Intron1	-	SHCBP1L	protein_coding	chr1	182921685	182921863	0.394678492239468	0.140822784810127	CpG: 79	chr1	182921819	182922644	chr1	182921819	182921863	*	*	*	*	*	0	0	chr1-182921740:182921890	chr1	182921740	182921890	chr1	182921740	182921863	*	*	*	*	*
chr1	182921685	182922136	0.259740259740259	-0.234313684728136	0.857142857142857	0.571428571428571	0.440726448505556	0.607010652711274	16	0.000769700611249004	HyperLow	chr1	182921864	182922660	FirstExon	-	SHCBP1L	protein_coding	chr1	182921864	182922136	0.60310421286031	0.341708542713568	CpG: 79	chr1	182921819	182922644	chr1	182921864	182922136	*	*	*	*	*	0	0	chr1-182921985:182922495	chr1	182921985	182922495	chr1	182921985	182922136	chr1-182922126:182922522	chr1	182922126	182922522	chr1
chr1	183155193	183155630	0.300833333333334	0.272585067668353	0.469202898550725	0.065	0.657792352357155	0.373209949931567	13	0.000889341928186358	HyperHigh	chr1	183154422	183155422	Promoter	+	LAMC2	protein_coding	chr1	183155193	183155422	0.524027459954233	0.229	*	*	*	*	*	0	0	*	*	*	*	*	0	0	chr1-183155065:183155575	chr1	183155065	183155575	chr1	183155193	183155422	chr1-183155323:183155703	chr1	183155323	183155703	chr1
chr1	183155193	183155630	0.300833333333334	0.272585067668353	0.469202898550725	0.065	0.657792352357155	0.373209949931567	13	0.000889341928186358	HyperHigh	chr1	183155423	183155566	FirstExon	+	LAMC2	protein_coding	chr1	183155423	183155566	0.327231121281465	1	*	*	*	*	*	0	0	*	*	*	*	*	0	0	chr1-183155065:183155575	chr1	183155065	183155575	chr1	183155423	183155566	chr1-183155323:183155703	chr1	183155323	183155703	chr1
chr1	183155193	183155630	0.300833333333334	0.272585067668353	0.469202898550725	0.065	0.657792352357155	0.373209949931567	13	0.000889341928186358	HyperHigh	chr1	183155567	183177015	Intron1	+	LAMC2	protein_coding	chr1	183155567	183155630	0.1441647597254	0.00293733681462141	*	*	*	*	*	0	0	*	*	*	*	*	0	0	chr1-183155585:183155775	chr1	183155585	183155775	chr1	183155585	183155630	chr1-183155323:183155703	chr1	183155323	183155703	chr1
chr1	183385830	183387691	0.315934065934066	0.323484822785371	0.458333333333333	0.0869565217391304	0.686271296777067	0.331343403825652	68	2.05343688230389e-14	HyperHigh	chr1	183262929	183387317	Intron1	-	NMNAT2	protein_coding	chr1	183385830	183387317	0.799032778076303	0.011954529375824	CpG: 114	chr1	183386000	183387664	chr1	183386000	183387317	chr1:183386078-183386213	chr1	183386078	183386213	chr1	183386078	183386213	chr1-183387165:183387375	chr1	183387165	183387375	chr1	183387165	183387317	chr1-183387256:183387547	chr1	183387256	183387547	chr1
chr1	183385830	183387691	0.315934065934066	0.323484822785371	0.458333333333333	0.0869565217391304	0.686271296777067	0.331343403825652	68	2.05343688230389e-14	HyperHigh	chr1	183387318	183387737	FirstExon	-	NMNAT2	protein_coding	chr1	183387318	183387691	0.200429876410532	0.890214797136038	CpG: 114	chr1	183386000	183387664	chr1	183387318	183387664	*	*	*	*	*	0	0	chr1-183387400:183387655	chr1	183387400	183387655	chr1	183387400	183387655	chr1-183387429:183387619	chr1	183387429	183387619	chr1
chr1	184214578	184225125	0.041666666666667	-0.24986508575316	1	0.909090909090909	0	0.307309364962454	42	0.000195266059849799	HypoLow	*	*	*	InterGenic	*	*	*	*	*	*	*	*	*	*	*	*	*	0	0	chr1:184214560-184214923	chr1	184214560	184214923	chr1	184214578	184214923	chr1-184224780:184224990	chr1	184224780	184224990	chr1	184224780	184224990	chr1-184223928:184224212	chr1	184223928	184224212	chr1
chr1	184604462	184610679	0.050125313283208	-0.223641857712728	1	0.870833333333334	0.162042321394155	0.331877376755904	55	0.000159951345266459	HypoLow	*	*	*	InterGenic	*	*	*	*	*	*	*	*	*	*	*	*	*	0	0	chr1:184607018-184607429	chr1	184607018	184607429	chr1	184607018	184607429	chr1-184610645:184610795	chr1	184610645	184610795	chr1	184610645	184610679	chr1-184610402:184610782	chr1	184610402	184610782	chr1
chr1	184633499	184633784	0.294117647058824	0.169805710643557	0.826086956521739	0.214285714285714	0.408131481801995	0.328808909576947	12	0.0085492501724884	HyperHigh	*	*	*	InterGenic	*	*	*	*	*	*	*	*	CpG: 36	chr1	184633223	184633663	chr1	184633499	184633663	*	*	*	*	*	0	0	chr1-184633405:184633690	chr1	184633405	184633690	chr1	184633499	184633690	chr1-184633729:184634249	chr1	184633729	184634249	chr1
chr1	185702894	185703741	0.153846153846154	0.318144667641655	0.227272727272727	0	0.518203253755189	0.137938950101211	24	0.000572700951641481	HypoHigh	chr1	185702682	185703682	Promoter	+	HMCN1	protein_coding	chr1	185702894	185703682	0.930342384887839	0.788	CpG: 26	chr1	185703458	185703662	chr1	185703458	185703662	*	*	*	*	*	0	0	chr1-185702980:185703950	chr1	185702980	185703950	chr1	185702980	185703682	chr1-185703480:185704295	chr1	185703480	185704295	chr1
chr1	185702894	185703741	0.153846153846154	0.318144667641655	0.227272727272727	0	0.518203253755189	0.137938950101211	24	0.000572700951641481	HypoHigh	chr1	185703683	185704179	FirstExon	+	HMCN1	protein_coding	chr1	185703683	185703741	0.0684769775678867	0.116935483870968	*	*	*	*	*	0	0	*	*	*	*	*	0	0	chr1-185702980:185703950	chr1	185702980	185703950	chr1	185703683	185703741	chr1-185703709:185704065	chr1	185703709	185704065	chr1
chr1	191904581	191926262	-0.083333333333333	0.201210753610957	0.833333333333333	0.9375	0.468546354076522	0.270426041486378	108	2.66411461976007e-08	HypoHigh	chr1	191844831	191933523	Intron1	+	RP11-541F9.2	lincRNA	chr1	191904581	191926262	1	0.244452712758761	*	*	*	*	*	0	0	*	*	*	*	*	0	0	chr1-191922700:191922970	chr1	191922700	191922970	chr1	191922700	191922970	chr1-191923030:191923351	chr1	191923030	191923351	chr1
chr1	196847158	196847844	0.285714285714286	0.098402970973113	0.666666666666667	0.19047619047619	0.518885569154274	0.417209722462608	14	0.00945710270202567	HyperHigh	chr1	196827539	196881869	Intron3	+	CFHR4	protein_coding	chr1	196847158	196847844	1	0.0126265415056138	CpG: 29	chr1	196847158	196847418	chr1	196847158	196847418	*	*	*	*	*	0	0	chr1-196847145:196847515	chr1	196847145	196847515	chr1	196847158	196847515	chr1-196847216:196847378	chr1	196847216	196847378	chr1
chr1	200841943	200842307	0.1	-0.41355684389223	1	0.833333333333333	0	0.538001820951407	12	0.0193047645520736	HypoLow	chr1	200841082	200842082	Promoter	+	GPR25	protein_coding	chr1	200841943	200842082	0.381868131868132	0.139	*	*	*	*	*	0	0	*	*	*	*	*	0	0	chr1-200841765:200842195	chr1	200841765	200842195	chr1	200841943	200842082	chr1-200841885:200842429	chr1	200841885	200842429	chr1
chr1	200841943	200842307	0.1	-0.41355684389223	1	0.833333333333333	0	0.538001820951407	12	0.0193047645520736	HypoLow	chr1	200842083	200843306	FirstExon	+	GPR25	protein_coding	chr1	200842083	200842307	0.615384615384615	0.183156173344235	CpG: 124	chr1	200842196	200843388	chr1	200842196	200842307	*	*	*	*	*	0	0	chr1-200841765:200842195	chr1	200841765	200842195	chr1	200842083	200842195	chr1-200842266:200842626	chr1	200842266	200842626	chr1
chr1	200842335	200843346	0.576156299840511	0.258406618671243	0.763305322128851	0.105263157894737	0.612436647129557	0.374334954714937	33	3.03419040278925e-11	HyperHigh	chr1	200842083	200843306	FirstExon	+	GPR25	protein_coding	chr1	200842335	200843306	0.960435212660732	0.793949304987735	CpG: 124	chr1	200842196	200843388	chr1	200842335	200843306	*	*	*	*	*	0	0	chr1-200843245:200844115	chr1	200843245	200844115	chr1	200843245	200843306	chr1-200842833:200843097	chr1	200842833	200843097	chr1
chr1	201157706	201160176	0.0778508771929825	-0.225355034571981	0.973684210526316	0.825757575757575	0.228658419422619	0.456624590154976	27	0.010979387663536	HypoLow	*	*	*	InterGenic	*	*	*	*	*	*	*	*	*	*	*	*	*	0	0	*	*	*	*	*	0	0	chr1-201159720:201160195	chr1	201159720	201160195	chr1	201159720	201160176	chr1-201159985:201160255	chr1	201159985	201160255	chr1
chr1	201228918	201229246	0.197010869565217	0.337099918841243	0.25	0	0.486382639009082	0.0460325712746565	11	0.00337784302100563	HypoHigh	*	*	*	InterGenic	*	*	*	*	*	*	*	*	*	*	*	*	*	0	0	*	*	*	*	*	0	0	chr1-201228585:201229690	chr1	201228585	201229690	chr1	201228918	201229246	chr1-201229108:201229778	chr1	201229108	201229778	chr1
chr1	201252664	201253526	0.225641025641026	-0.027598392021091	0.647058823529412	0.392307692307693	0.490496603978656	0.486382639009082	29	0.00517605993563695	HyperHigh	chr1	201252580	201253032	FirstExon	+	PKP1	protein_coding	chr1	201252664	201253032	0.426914153132251	0.814159292035398	CpG: 98	chr1	201252452	201253648	chr1	201252664	201253032	*	*	*	*	*	0	0	chr1-201252165:201252855	chr1	201252165	201252855	chr1	201252664	201252855	chr1-201252652:201252972	chr1	201252652	201252972	chr1
chr1	201252664	201253526	0.225641025641026	-0.027598392021091	0.647058823529412	0.392307692307693	0.490496603978656	0.486382639009082	29	0.00517605993563695	HyperHigh	chr1	201253033	201263069	Intron1	+	PKP1	protein_coding	chr1	201253033	201253526	0.571925754060325	0.04912315663611	CpG: 98	chr1	201252452	201253648	chr1	201253033	201253526	*	*	*	*	*	0	0	chr1-201253120:201253535	chr1	201253120	201253535	chr1	201253120	201253526	chr1-201252395:201253299	chr1	201252395	201253299	chr1
chr1	201324826	201326104	-0.0916666666666665	0.27741629653341	0.8875	1	0.444957589191678	0.157125886949527	19	0.00677318359140016	HypoHigh	*	*	*	InterGenic	*	*	*	*	*	*	*	*	*	*	*	*	*	0	0	*	*	*	*	*	0	0	chr1-201326020:201326355	chr1	201326020	201326355	chr1	201326020	201326104	chr1-201325943:201326247	chr1	201325943	201326247	chr1
chr1	201337460	201340230	0.0629370629370629	-0.216674140549451	1	0.733333333333333	0.306098611351497	0.432931646898466	32	0.017091953996514	HypoLow	chr1	201337356	201341154	Intron4	-	TNNT2	protein_coding	chr1	201337460	201340230	1	0.729331226961559	*	*	*	*	*	0	0	*	*	*	*	*	0	0	chr1-201339700:201339870	chr1	201339700	201339870	chr1	201339700	201339870	chr1-201338410:201338963	chr1	201338410	201338963	chr1
chr1	201368261	201369030	0.248382505175984	0.278556793888264	0.289915966386555	0.0513157894736842	0.528320833573719	0.298386803982954	27	3.09821712654567e-05	HyperHigh	chr1	201358432	201368396	Intron1	-	LAD1	protein_coding	chr1	201368261	201368396	0.17555266579974	0.0135487755921317	*	*	*	*	*	0	0	*	*	*	*	*	0	0	chr1-201368365:201368910	chr1	201368365	201368910	chr1	201368365	201368396	chr1-201368377:201368985	chr1	201368377	201368985	chr1
chr1	201368261	201369030	0.248382505175984	0.278556793888264	0.289915966386555	0.0513157894736842	0.528320833573719	0.298386803982954	27	3.09821712654567e-05	HyperHigh	chr1	201368397	201368736	FirstExon	-	LAD1	protein_coding	chr1	201368397	201368736	0.440832249674902	1	CpG: 54	chr1	201368560	201369032	chr1	201368560	201368736	*	*	*	*	*	0	0	chr1-201368365:201368910	chr1	201368365	201368910	chr1	201368397	201368736	chr1-201368650:201369087	chr1	201368650	201369087	chr1
chr1	201368261	201369030	0.248382505175984	0.278556793888264	0.289915966386555	0.0513157894736842	0.528320833573719	0.298386803982954	27	3.09821712654567e-05	HyperHigh	chr1	201368737	201369737	Promoter	-	LAD1	protein_coding	chr1	201368737	201369030	0.381014304291287	0.293	CpG: 54	chr1	201368560	201369032	chr1	201368737	201369030	*	*	*	*	*	0	0	chr1-201368965:201369255	chr1	201368965	201369255	chr1	201368965	201369030	chr1-201369019:201369303	chr1	201369019	201369303	chr1
chr1	201462516	201463836	0.248868778280543	0.219985462935166	0.294117647058824	0.0588235294117647	0.5	0.222854814399865	16	0.00120146100936589	HyperHigh	chr1	201459473	201465319	Intron3	-	CSRP1	protein_coding	chr1	201462516	201463836	1	0.225795415668833	*	*	*	*	*	0	0	chr1:201463619-201463933	chr1	201463619	201463933	chr1	201463619	201463836	chr1-201463465:201463755	chr1	201463465	201463755	chr1	201463465	201463755	chr1-201463571:201463827	chr1	201463571	201463827	chr1
chr1	201873242	201877928	-0.0893162393162395	0.284745250864844	0.833333333333333	1	0.45698353148489	0.134176735655481	47	4.57894541348448e-06	HypoHigh	chr1	201869880	201915207	Intron1	-	LMOD1	protein_coding	chr1	201873242	201877928	1	0.103382090144947	*	*	*	*	*	0	0	*	*	*	*	*	0	0	chr1-201877765:201877975	chr1	201877765	201877975	chr1	201877765	201877928	chr1-201876959:201877329	chr1	201876959	201877329	chr1
chr1	202136733	202137549	-0.248376623376624	0.088888888888889	0.174242424242424	0.708333333333333	0.381541071418193	0.288262326418938	11	0.0335525348623177	HypoHigh	chr1	202136178	202137178	Promoter	+	PTPRVP	pseudogene	chr1	202136733	202137178	0.545343137254902	0.445	*	*	*	*	*	0	0	*	*	*	*	*	0	0	chr1-202137145:202137510	chr1	202137145	202137510	chr1	202137145	202137178	chr1-202137168:202137485	chr1	202137168	202137485	chr1
chr1	202136733	202137549	-0.248376623376624	0.088888888888889	0.174242424242424	0.708333333333333	0.381541071418193	0.288262326418938	11	0.0335525348623177	HypoHigh	chr1	202137179	202137639	FirstExon	+	PTPRVP	pseudogene	chr1	202137179	202137549	0.45343137254902	0.804347826086957	*	*	*	*	*	0	0	*	*	*	*	*	0	0	chr1-202137145:202137510	chr1	202137145	202137510	chr1	202137179	202137510	chr1-202137291:202137609	chr1	202137291	202137609	chr1
chr1	202182641	202183414	0.269281045751634	0.221423419573922	0.607692307692308	0.162280701754386	0.526290454417482	0.336287224981383	15	0.0285884925224421	HyperHigh	chr1	202163330	202194550	Intron1	+	LGR6	protein_coding	chr1	202182641	202183414	1	0.0247597693786035	CpG: 31	chr1	202183193	202183526	chr1	202183193	202183414	*	*	*	*	*	0	0	chr1-202183100:202183675	chr1	202183100	202183675	chr1	202183100	202183414	chr1-202183321:202183701	chr1	202183321	202183701	chr1
chr1	203714822	203721491	-0.066666666666666	0.214989321119614	0.9	1	0.270426041486378	0	62	5.36811076278293e-05	HypoHigh	*	*	*	InterGenic	*	*	*	*	*	*	*	*	*	*	*	*	*	0	0	*	*	*	*	*	0	0	chr1-203721180:203721450	chr1	203721180	203721450	chr1	203721180	203721450	chr1-203721113:203721509	chr1	203721113	203721509	chr1
chr1	203724753	203728715	-0.08974358974359	0.232964579512741	0.882352941176471	1	0.408131481801995	0.181188147733199	38	0.000490022870420666	HypoHigh	*	*	*	InterGenic	*	*	*	*	*	*	*	*	*	*	*	*	*	0	0	chr1:203728040-203728170	chr1	203728040	203728170	chr1	203728040	203728170	chr1-203725700:203726115	chr1	203725700	203726115	chr1	203725700	203726115	chr1-203727952:203728472	chr1	203727952	203728472	chr1
chr1	204264531	204265383	-0.449747474747475	0.065772495119449	0.354166666666667	0.788888888888889	0.493957665701222	0.420071006914396	13	0.0038382964035256	HypoHigh	chr1	204243938	204328821	Intron1	-	PLEKHA6	protein_coding	chr1	204264531	204265383	1	0.0100373455226606	*	*	*	*	*	0	0	*	*	*	*	*	0	0	chr1-204264825:204265315	chr1	204264825	204265315	chr1	204264825	204265315	chr1-204265360:204265900	chr1	204265360	204265900	chr1
chr1	204327539	204331069	-0.124183006535948	-0.215192173168423	0.0714285714285714	0.235294117647059	0.240642698295787	0.385593216482346	32	0.00754995838715539	HypoLow	chr1	204243938	204328821	Intron1	-	PLEKHA6	protein_coding	chr1	204327539	204328821	0.363172804532578	0.0151031419718907	*	*	*	*	*	0	0	*	*	*	*	*	0	0	chr1-204328300:204328875	chr1	204328300	204328875	chr1	204328300	204328821	chr1-204328805:204329370	chr1	204328805	204329370	chr1
chr1	204327539	204331069	-0.124183006535948	-0.215192173168423	0.0714285714285714	0.235294117647059	0.240642698295787	0.385593216482346	32	0.00754995838715539	HypoLow	chr1	204328822	204329044	FirstExon	-	PLEKHA6	protein_coding	chr1	204328822	204329044	0.0628895184135977	1	*	*	*	*	*	0	0	*	*	*	*	*	0	0	chr1-204328880:204329415	chr1	204328880	204329415	chr1	204328880	204329044	chr1-204329042:204329392	chr1	204329042	204329392	chr1
chr1	204327539	204331069	-0.124183006535948	-0.215192173168423	0.0714285714285714	0.235294117647059	0.240642698295787	0.385593216482346	32	0.00754995838715539	HypoLow	chr1	204329045	204330045	Promoter	-	PLEKHA6	protein_coding	chr1	204329045	204330045	0.28328611898017	1	*	*	*	*	*	0	0	*	*	*	*	*	0	0	chr1-204329425:204329730	chr1	204329425	204329730	chr1	204329425	204329730	chr1-204329420:204330076	chr1	204329420	204330076	chr1
chr1	205312493	205313093	0.107954545454545	0.2142359237188	0.162280701754386	0.0476190476190476	0.43386298981536	0.222343476214566	25	0.000235915987419851	HypoHigh	chr1	205312357	205312921	Exon5	-	KLHDC8A	protein_coding	chr1	205312493	205312921	0.713333333333333	0.75886524822695	CpG: 111	chr1	205312493	205313576	chr1	205312493	205312921	*	*	*	*	*	0	0	chr1-205312860:205313790	chr1	205312860	205313790	chr1	205312860	205312921	chr1-205312701:205313345	chr1	205312701	205313345	chr1
chr1	205312493	205313093	0.107954545454545	0.2142359237188	0.162280701754386	0.0476190476190476	0.43386298981536	0.222343476214566	25	0.000235915987419851	HypoHigh	chr1	205312922	205313261	Intron4	-	KLHDC8A	protein_coding	chr1	205312922	205313093	0.285	0.504424778761062	CpG: 111	chr1	205312493	205313576	chr1	205312922	205313093	*	*	*	*	*	0	0	chr1-205312860:205313790	chr1	205312860	205313790	chr1	205312922	205313093	chr1-205313017:205313521	chr1	205313017	205313521	chr1
chr1	205424111	205425909	0.0588235294117647	0.21340214445349	0.0769230769230769	0	0.432931646898466	0.240642698295787	40	0.0121629021063287	HypoHigh	chr1	205424056	205425056	Promoter	+	RP11-576D8.4	lincRNA	chr1	205424111	205425056	0.525583982202447	0.945	CpG: 137	chr1	205424829	205426556	chr1	205424829	205425056	chr1:205423770-205424352	chr1	205423770	205424352	chr1	205424111	205424352	chr1-205424700:205425395	chr1	205424700	205425395	chr1	205424700	205425056	chr1-205424998:205425983	chr1	205424998	205425983	chr1
chr1	205424111	205425909	0.0588235294117647	0.21340214445349	0.0769230769230769	0	0.432931646898466	0.240642698295787	40	0.0121629021063287	HypoHigh	chr1	205425057	205425351	FirstExon	+	RP11-576D8.4	lincRNA	chr1	205425057	205425351	0.163515016685206	1	CpG: 137	chr1	205424829	205426556	chr1	205425057	205425351	*	*	*	*	*	0	0	chr1-205424700:205425395	chr1	205424700	205425395	chr1	205425057	205425351	chr1-205425205:205426337	chr1	205425205	205426337	chr1
chr1	205424111	205425909	0.0588235294117647	0.21340214445349	0.0769230769230769	0	0.432931646898466	0.240642698295787	40	0.0121629021063287	HypoHigh	chr1	205425352	205426019	Intron1	+	RP11-576D8.4	lincRNA	chr1	205425352	205425909	0.309788654060067	0.835082458770615	CpG: 137	chr1	205424829	205426556	chr1	205425352	205425909	*	*	*	*	*	0	0	chr1-205425885:205426995	chr1	205425885	205426995	chr1	205425885	205425909	chr1-205425899:205426543	chr1	205425899	205426543	chr1
chr1	206223049	206223330	0.285714285714286	0.011562822591632	0.666666666666667	0.214285714285714	0.468546354076522	0.5	12	0.00779237982311082	HyperHigh	chr1	206222991	206223261	Exon2	-	RP11-38J22.3	antisense	chr1	206223049	206223261	0.754448398576512	0.785185185185185	*	*	*	*	*	0	0	*	*	*	*	*	0	0	chr1-206222880:206223250	chr1	206222880	206223250	chr1	206223049	206223250	chr1-206223255:206223677	chr1	206223255	206223677	chr1
chr1	206223049	206223330	0.285714285714286	0.011562822591632	0.666666666666667	0.214285714285714	0.468546354076522	0.5	12	0.00779237982311082	HyperHigh	chr1	206223262	206223505	Intron1	-	RP11-38J22.3	antisense	chr1	206223262	206223330	0.241992882562278	0.279835390946502	*	*	*	*	*	0	0	*	*	*	*	*	0	0	*	*	*	*	*	0	0	chr1-206223304:206223704	chr1	206223304	206223704	chr1
chr1	206223049	206223330	0.285714285714286	0.011562822591632	0.666666666666667	0.214285714285714	0.468546354076522	0.5	12	0.00779237982311082	HyperHigh	chr1	206222975	206223975	Promoter	+	AVPR1B	protein_coding	chr1	206223049	206223330	1	0.281	*	*	*	*	*	0	0	*	*	*	*	*	0	0	chr1-206222880:206223250	chr1	206222880	206223250	chr1	206223049	206223250	chr1-206223304:206223704	chr1	206223304	206223704	chr1
chr1	207597750	207598586	0.142045454545454	-0.211195969734841	0.938888888888888	0.759615384615385	0.192213459404	0.489621919613899	19	0.00430001651612414	HypoLow	*	*	*	InterGenic	*	*	*	*	*	*	*	*	*	*	*	*	*	0	0	chr1:207598053-207598267	chr1	207598053	207598267	chr1	207598053	207598267	chr1-207597845:207598475	chr1	207597845	207598475	chr1	207597845	207598475	chr1-207598253:207598573	chr1	207598253	207598573	chr1
chr1	208135620	208136392	-0.236111111111111	0.307141377429955	0.5625	0.791666666666667	0.645884205176006	0.339147049074952	13	0.0260665689343225	HypoHigh	*	*	*	InterGenic	*	*	*	*	*	*	*	*	*	*	*	*	*	0	0	*	*	*	*	*	0	0	chr1-208136105:208136795	chr1	208136105	208136795	chr1	208136105	208136392	chr1-208136379:208137214	chr1	208136379	208137214	chr1
chr1	208256202	208257293	0.312820512820513	-0.171291074139652	0.833333333333333	0.516129032258065	0.432931646898466	0.563160755673061	18	7.4503906460754e-06	HyperLow	chr1	208255854	208257724	Intron10	-	PLXNA2	protein_coding	chr1	208256202	208257293	1	0.583422459893048	*	*	*	*	*	0	0	*	*	*	*	*	0	0	chr1-208256785:208257275	chr1	208256785	208257275	chr1	208256785	208257275	chr1-208256878:208256969	chr1	208256878	208256969	chr1
chr1	209238937	209244924	-0.138095238095238	0.233626362502117	0.8	1	0.45698353148489	0.216674140549451	29	0.00240636073045683	HypoHigh	*	*	*	InterGenic	*	*	*	*	*	*	*	*	*	*	*	*	*	0	0	*	*	*	*	*	0	0	chr1-209242145:209242315	chr1	209242145	209242315	chr1	209242145	209242315	chr1-209244166:209244884	chr1	209244166	209244884	chr1
chr1	209978841	209979972	0.25	-0.113346353118859	0.545454545454545	0.153846153846154	0.458289014656807	0.52203631327916	27	0.00556090295682203	HyperLow	chr1	209975389	209979291	Intron1	-	IRF6	protein_coding	chr1	209978841	209979291	0.397877984084881	0.115325474115838	*	*	*	*	*	0	0	*	*	*	*	*	0	0	chr1-209978785:209979995	chr1	209978785	209979995	chr1	209978841	209979291	chr1-209979290:209979700	chr1	209979290	209979700	chr1
chr1	209978841	209979972	0.25	-0.113346353118859	0.545454545454545	0.153846153846154	0.458289014656807	0.52203631327916	27	0.00556090295682203	HyperLow	chr1	209979292	209979389	FirstExon	-	IRF6	protein_coding	chr1	209979292	209979389	0.0857648099027409	1	CpG: 38	chr1	209979316	209979666	chr1	209979316	209979389	*	*	*	*	*	0	0	chr1-209978785:209979995	chr1	209978785	209979995	chr1	209979292	209979389	chr1-209979385:209979885	chr1	209979385	209979885	chr1
chr1	209978841	209979972	0.25	-0.113346353118859	0.545454545454545	0.153846153846154	0.458289014656807	0.52203631327916	27	0.00556090295682203	HyperLow	chr1	209979390	209980390	Promoter	-	IRF6	protein_coding	chr1	209979390	209979972	0.514588859416446	0.582	CpG: 38	chr1	209979316	209979666	chr1	209979390	209979666	*	*	*	*	*	0	0	chr1-209978785:209979995	chr1	209978785	209979995	chr1	209979390	209979972	chr1-209979859:209980235	chr1	209979859	209980235	chr1
chr1	210110860	210112280	0.375	0.257697746868815	0.454545454545455	0.0714285714285714	0.597493750120193	0.288618872485741	30	4.87970131559779e-08	HyperHigh	chr1	210110595	210111595	Promoter	+	SYT14	protein_coding	chr1	210110860	210111595	0.517605633802817	0.735	CpG: 99	chr1	210111179	210112054	chr1	210111179	210111595	*	*	*	*	*	0	0	chr1-210111385:210111975	chr1	210111385	210111975	chr1	210111385	210111595	chr1-210111510:210112324	chr1	210111510	210112324	chr1
chr1	210110860	210112280	0.375	0.257697746868815	0.454545454545455	0.0714285714285714	0.597493750120193	0.288618872485741	30	4.87970131559779e-08	HyperHigh	chr1	210111596	210111622	FirstExon	+	SYT14	protein_coding	chr1	210111596	210111622	0.0183098591549296	1	CpG: 99	chr1	210111179	210112054	chr1	210111596	210111622	*	*	*	*	*	0	0	chr1-210111385:210111975	chr1	210111385	210111975	chr1	210111596	210111622	chr1-210111510:210112324	chr1	210111510	210112324	chr1
chr1	210110860	210112280	0.375	0.257697746868815	0.454545454545455	0.0714285714285714	0.597493750120193	0.288618872485741	30	4.87970131559779e-08	HyperHigh	chr1	210111623	210126053	Intron1	+	SYT14	protein_coding	chr1	210111623	210112280	0.462676056338028	0.0455301455301455	CpG: 99	chr1	210111179	210112054	chr1	210111623	210112054	*	*	*	*	*	0	0	chr1-210112085:210112490	chr1	210112085	210112490	chr1	210112085	210112280	chr1-210111890:210112897	chr1	210111890	210112897	chr1
chr1	210424277	210426412	0.0869565217391304	0.211779514389691	0.176470588235294	0.0555555555555556	0.496175098299249	0.233280946628746	64	0.000328687634478352	HypoHigh	*	*	*	InterGenic	*	*	*	*	*	*	*	*	*	*	*	*	*	0	0	chr1:210425971-210426288	chr1	210425971	210426288	chr1	210425971	210426288	chr1-210425925:210426935	chr1	210425925	210426935	chr1	210425925	210426412	chr1-210426098:210426614	chr1	210426098	210426614	chr1
chr1	210465413	210466206	0.192558602388324	0.398289125981061	0.275	0.0363756613756614	0.541689913744984	0.193824439646394	31	3.28699939391141e-06	HypoHigh	*	*	*	InterGenic	*	*	*	*	*	*	*	*	CpG: 44	chr1	210465709	210466212	chr1	210465709	210466206	*	*	*	*	*	0	0	chr1-210465200:210466490	chr1	210465200	210466490	chr1	210465413	210466206	chr1-210466039:210466423	chr1	210466039	210466423	chr1
chr1	211669272	211674234	-0.083333333333333	0.208856700608239	0.904545454545455	1	0.306703988156976	0	41	2.61125629192189e-05	HypoHigh	*	*	*	InterGenic	*	*	*	*	*	*	*	*	*	*	*	*	*	0	0	*	*	*	*	*	0	0	chr1-211674085:211674235	chr1	211674085	211674235	chr1	211674085	211674234	chr1-211671985:211672369	chr1	211671985	211672369	chr1
chr1	211700920	211705565	-0.0526315789473684	-0.21251250375535	0.625	0.75	0.216674140549451	0.333333333333333	46	0.469456356002444	HypoLow	*	*	*	InterGenic	*	*	*	*	*	*	*	*	*	*	*	*	*	0	0	chr1:211702766-211702975	chr1	211702766	211702975	chr1	211702766	211702975	chr1-211705485:211705755	chr1	211705485	211705755	chr1	211705485	211705565	chr1-211705446:211705850	chr1	211705446	211705850	chr1
chr1	211779338	211779841	-0.536706349206349	-0.104483034565656	0.222222222222222	0.763888888888889	0.471277954657867	0.501323809620441	11	0.000244804824524455	HypoLow	*	*	*	InterGenic	*	*	*	*	*	*	*	*	*	*	*	*	*	0	0	*	*	*	*	*	0	0	chr1-211779825:211780075	chr1	211779825	211780075	chr1	211779825	211779841	chr1-211779815:211780179	chr1	211779815	211780179	chr1
chr1	214078931	214089810	0	0.20843820755113	0.904545454545455	0.928571428571429	0.374105018213642	0.181188147733199	93	0.165112385634128	HypoHigh	chr1	214068862	214139413	Intron1	-	PROX1-AS1	antisense	chr1	214078931	214089810	1	0.154200507434338	*	*	*	*	*	0	0	*	*	*	*	*	0	0	chr1-214089165:214089355	chr1	214089165	214089355	chr1	214089165	214089355	chr1-214087754:214088038	chr1	214087754	214088038	chr1
chr1	215254945	215257327	0.0797101449275366	0.22446277303443	0.125	0.0384615384615385	0.426890709840296	0.181188147733199	66	1.27761970110189e-05	HypoHigh	chr1	215179299	215259710	Intron1	+	KCNK2	protein_coding	chr1	215254945	215257327	1	0.0296228127992439	CpG: 53	chr1	215256051	215256636	chr1	215256051	215256636	*	*	*	*	*	0	0	chr1-215256185:215257315	chr1	215256185	215257315	chr1	215256185	215257315	chr1-215257060:215257470	chr1	215257060	215257470	chr1
chr1	216136707	216144107	-0.071794871794872	0.226190763960238	0.870833333333334	0.970588235294118	0.382944951426972	0.197224259527442	51	0.00998641796403995	HypoHigh	chr1	216108138	216138658	Intron37	-	USH2A	protein_coding	chr1	216136707	216138658	0.263648648648649	0.0639252948885976	*	*	*	*	*	0	0	*	*	*	*	*	0	0	*	*	*	*	*	0	0	chr1-216137304:216137514	chr1	216137304	216137514	chr1
chr1	216136707	216144107	-0.071794871794872	0.226190763960238	0.870833333333334	0.970588235294118	0.382944951426972	0.197224259527442	51	0.00998641796403995	HypoHigh	chr1	216138659	216138821	Exon37	-	USH2A	protein_coding	chr1	216138659	216138821	0.0218918918918919	1	*	*	*	*	*	0	0	*	*	*	*	*	0	0	*	*	*	*	*	0	0	*	*	*	*	*
chr1	216136707	216144107	-0.071794871794872	0.226190763960238	0.870833333333334	0.970588235294118	0.382944951426972	0.197224259527442	51	0.00998641796403995	HypoHigh	chr1	216138822	216143966	Intron36	-	USH2A	protein_coding	chr1	216138822	216143966	0.695135135135135	1	*	*	*	*	*	0	0	*	*	*	*	*	0	0	chr1-216143860:216144070	chr1	216143860	216144070	chr1	216143860	216143966	chr1-216143832:216144116	chr1	216143832	216144116	chr1
chr1	216136707	216144107	-0.071794871794872	0.226190763960238	0.870833333333334	0.970588235294118	0.382944951426972	0.197224259527442	51	0.00998641796403995	HypoHigh	chr1	216143967	216144118	Exon36	-	USH2A	protein_coding	chr1	216143967	216144107	0.0189189189189189	0.927152317880795	*	*	*	*	*	0	0	*	*	*	*	*	0	0	chr1-216143860:216144070	chr1	216143860	216144070	chr1	216143967	216144070	chr1-216143832:216144116	chr1	216143832	216144116	chr1
chr1	216774122	216774838	0.222222222222222	0.40989444998174	0.285714285714286	0.0476190476190476	0.635213020743189	0.181188147733199	24	3.16186813264312e-07	HyperHigh	chr1	216741441	216824314	Intron5	-	ESRRG	protein_coding	chr1	216774122	216774838	1	0.00863972584557093	CpG: 43	chr1	216774339	216774734	chr1	216774339	216774734	chr1:216774004-216774285	chr1	216774004	216774285	chr1	216774122	216774285	chr1-216774085:216774955	chr1	216774085	216774955	chr1	216774122	216774838	chr1-216774560:216775151	chr1	216774560	216775151	chr1
chr1	217309969	217314097	0.224233283056813	0.255610914380366	0.333333333333333	0.054093567251462	0.533692012218979	0.27700667082291	105	1.15185529723076e-15	HyperHigh	chr1	217133028	217311008	Intron1	-	ESRRG	protein_coding	chr1	217309969	217311008	0.251695736434109	0.00583773457691875	CpG: 46	chr1	217310749	217311178	chr1	217310749	217311008	*	*	*	*	*	0	0	chr1-217310105:217311955	chr1	217310105	217311955	chr1	217310105	217311008	chr1-217310678:217311294	chr1	217310678	217311294	chr1
chr1	217309969	217314097	0.224233283056813	0.255610914380366	0.333333333333333	0.054093567251462	0.533692012218979	0.27700667082291	105	1.15185529723076e-15	HyperHigh	chr1	217311009	217311097	FirstExon	-	ESRRG	protein_coding	chr1	217311009	217311097	0.0213178294573643	1	CpG: 46	chr1	217310749	217311178	chr1	217311009	217311097	*	*	*	*	*	0	0	chr1-217310105:217311955	chr1	217310105	217311955	chr1	217311009	217311097	chr1-217310678:217311294	chr1	217310678	217311294	chr1
chr1	217309969	217314097	0.224233283056813	0.255610914380366	0.333333333333333	0.054093567251462	0.533692012218979	0.27700667082291	105	1.15185529723076e-15	HyperHigh	chr1	217311098	217312098	Promoter	-	ESRRG	protein_coding	chr1	217311098	217312098	0.242248062015504	1	CpG: 25	chr1	217311467	217311773	chr1	217311467	217311773	*	*	*	*	*	0	0	chr1-217311985:217312015	chr1	217311985	217312015	chr1	217311985	217312015	chr1-217311443:217312087	chr1	217311443	217312087	chr1
chr1	218098311	218098649	0.370833333333333	0.228736068446934	0.4375	0.166666666666667	0.622544630323737	0.528320833573719	12	0.0047017212171665	HyperHigh	*	*	*	InterGenic	*	*	*	*	*	*	*	*	*	*	*	*	*	0	0	*	*	*	*	*	0	0	chr1-218098220:218098775	chr1	218098220	218098775	chr1	218098311	218098649	chr1-218098250:218098894	chr1	218098250	218098894	chr1
chr1	219297082	219300308	0.095238095238095	-0.233873897835013	1	0.857142857142857	0.216674140549451	0.417209722462608	22	0.0107230416400281	HypoLow	chr1	219260003	219323280	Intron3	-	RP11-135J2.4	antisense	chr1	219297082	219300308	1	0.0509821894211167	*	*	*	*	*	0	0	*	*	*	*	*	0	0	chr1-219300260:219300470	chr1	219300260	219300470	chr1	219300260	219300308	chr1-219300141:219300846	chr1	219300141	219300846	chr1
chr1	220131592	220131774	-0.417251461988304	0.201300891588162	0.404970760233918	0.809090909090909	0.576943597871219	0.411181795791648	7	0.00216450216450216	HypoHigh	*	*	*	InterGenic	*	*	*	*	*	*	*	*	*	*	*	*	*	0	0	*	*	*	*	*	0	0	*	*	*	*	*	0	0	*	*	*	*	*
chr1	220565177	220573860	-0.083916083916084	0.210571034600288	0.84412955465587	0.935416666666667	0.466224656114295	0.271676853994307	43	0.00172518816336997	HypoHigh	chr1	220573463	220574463	Promoter	+	RP11-410C4.5	lincRNA	chr1	220573463	220573860	0.0457215248186111	0.397	*	*	*	*	*	0	0	*	*	*	*	*	0	0	*	*	*	*	*	0	0	*	*	*	*	*
chr1	223566179	223567250	0.234848484848485	0.307916481145415	0.5	0.238095238095238	0.624407145204638	0.38003855950487	30	2.02629728425392e-05	HyperHigh	chr1	223565714	223566714	Promoter	+	C1orf65	protein_coding	chr1	223566179	223566714	0.49953314659197	0.535	CpG: 61	chr1	223566642	223567268	chr1	223566642	223566714	*	*	*	*	*	0	0	chr1-223566705:223566735	chr1	223566705	223566735	chr1	223566705	223566714	chr1-223566685:223567115	chr1	223566685	223567115	chr1
chr1	223566179	223567250	0.234848484848485	0.307916481145415	0.5	0.238095238095238	0.624407145204638	0.38003855950487	30	2.02629728425392e-05	HyperHigh	chr1	223566715	223568812	FirstExon	+	C1orf65	protein_coding	chr1	223566715	223567250	0.49953314659197	0.255126371006199	CpG: 61	chr1	223566642	223567268	chr1	223566715	223567250	*	*	*	*	*	0	0	chr1-223566805:223567375	chr1	223566805	223567375	chr1	223566805	223567250	chr1-223566959:223567339	chr1	223566959	223567339	chr1
chr1	224731481	224737897	0.05	-0.235707387371024	1	0.92	0.137938950101211	0.307309364962454	46	9.51172782793058e-05	HypoLow	*	*	*	InterGenic	*	*	*	*	*	*	*	*	*	*	*	*	*	0	0	chr1:224733345-224733601	chr1	224733345	224733601	chr1	224733345	224733601	chr1-224734740:224734895	chr1	224734740	224734895	chr1	224734740	224734895	chr1-224736797:224737177	chr1	224736797	224737177	chr1
chr1	224804112	224804987	0.196969696969697	0.306098611351497	0.333333333333333	0.0526315789473684	0.516264980231799	0.240642698295787	32	2.84995956959411e-06	HypoHigh	chr1	224803995	224804957	FirstExon	+	CNIH3	protein_coding	chr1	224804112	224804957	0.965714285714286	0.878378378378378	CpG: 159	chr1	224803637	224805314	chr1	224804112	224804957	*	*	*	*	*	0	0	chr1-224803385:224806415	chr1	224803385	224806415	chr1	224804112	224804957	chr1-224804857:224806011	chr1	224804857	224806011	chr1
chr1	224804112	224804987	0.196969696969697	0.306098611351497	0.333333333333333	0.0526315789473684	0.516264980231799	0.240642698295787	32	2.84995956959411e-06	HypoHigh	chr1	224804958	224868659	Intron1	+	CNIH3	protein_coding	chr1	224804958	224804987	0.0331428571428571	0.000455251879876297	CpG: 159	chr1	224803637	224805314	chr1	224804958	224804987	*	*	*	*	*	0	0	chr1-224803385:224806415	chr1	224803385	224806415	chr1	224804958	224804987	chr1-224804857:224806011	chr1	224804857	224806011	chr1
chr1	224804112	224804987	0.196969696969697	0.306098611351497	0.333333333333333	0.0526315789473684	0.516264980231799	0.240642698295787	32	2.84995956959411e-06	HypoHigh	chr1	224803923	224804923	Promoter	-	RP11-100E13.1	antisense	chr1	224804112	224804923	0.926857142857143	0.811	CpG: 159	chr1	224803637	224805314	chr1	224804112	224804923	*	*	*	*	*	0	0	chr1-224803385:224806415	chr1	224803385	224806415	chr1	224804112	224804923	chr1-224804857:224806011	chr1	224804857	224806011	chr1
chr1	225061669	225064337	0.214285714285714	-0.222222222222222	0.941176470588235	0.684210526315789	0.197224259527442	0.43810682890206	20	0.00498547016950735	HyperLow	*	*	*	InterGenic	*	*	*	*	*	*	*	*	*	*	*	*	*	0	0	*	*	*	*	*	0	0	chr1-225063840:225064055	chr1	225063840	225064055	chr1	225063840	225064055	chr1-225063774:225064098	chr1	225063774	225064098	chr1
chr1	225192600	225195930	0	0.216332584364788	0.947368421052632	1	0.281783645540812	0	24	0.555837096356078	HypoHigh	chr1	225155286	225195114	Intron7	+	DNAH14	protein_coding	chr1	225192600	225195114	0.754954954954955	0.0631214221150949	*	*	*	*	*	0	0	*	*	*	*	*	0	0	*	*	*	*	*	0	0	chr1-225194701:225195217	chr1	225194701	225195217	chr1
chr1	225192600	225195930	0	0.216332584364788	0.947368421052632	1	0.281783645540812	0	24	0.555837096356078	HypoHigh	chr1	225195115	225195246	Exon8	+	DNAH14	protein_coding	chr1	225195115	225195246	0.0393393393393393	1	*	*	*	*	*	0	0	*	*	*	*	*	0	0	*	*	*	*	*	0	0	chr1-225194701:225195217	chr1	225194701	225195217	chr1
chr1	225192600	225195930	0	0.216332584364788	0.947368421052632	1	0.281783645540812	0	24	0.555837096356078	HypoHigh	chr1	225195247	225211316	Intron8	+	DNAH14	protein_coding	chr1	225195247	225195930	0.205105105105105	0.0425042006347626	*	*	*	*	*	0	0	*	*	*	*	*	0	0	*	*	*	*	*	0	0	*	*	*	*	*
chr1	225864872	225865679	0.25	0.037719270622996	0.545454545454545	0.25	0.516264980231799	0.459594497828725	20	0.00459157495392682	HyperHigh	*	*	*	InterGenic	*	*	*	*	*	*	*	*	CpG: 25	chr1	225865068	225865328	chr1	225865068	225865328	*	*	*	*	*	0	0	chr1-225864985:225865795	chr1	225864985	225865795	chr1	225864985	225865679	chr1-225865588:225865877	chr1	225865588	225865877	chr1
chr1	225998612	225998948	0.4	-0.222222222222222	0.857142857142857	0.476190476190476	0.306098611351497	0.584238426326568	8	0.00873443758538893	HyperLow	chr1	225997872	226016425	Intron1	+	EPHX1	protein_coding	chr1	225998612	225998948	1	0.018110278661133	*	*	*	*	*	0	0	*	*	*	*	*	0	0	chr1-225998560:225998975	chr1	225998560	225998975	chr1	225998612	225998948	chr1-225998935:225999459	chr1	225998935	225999459	chr1
chr1	226322520	226322965	0.164835164835165	-0.254734835502873	0.625	0.375	0.306098611351497	0.63943194468483	14	0.10598835194923	HypoLow	*	*	*	InterGenic	*	*	*	*	*	*	*	*	*	*	*	*	*	0	0	*	*	*	*	*	0	0	chr1-226322720:226323255	chr1	226322720	226323255	chr1	226322720	226322965	chr1-226322950:226323434	chr1	226322950	226323434	chr1
chr1	226681445	226682227	-0.295634920634921	-0.243432400872635	0.0972222222222222	0.364389233954451	0.437096626973749	0.507285631488224	19	0.00113004548316485	HypoLow	*	*	*	InterGenic	*	*	*	*	*	*	*	*	*	*	*	*	*	0	0	*	*	*	*	*	0	0	chr1-226681960:226682135	chr1	226681960	226682135	chr1	226681960	226682135	chr1-226681915:226682345	chr1	226681915	226682345	chr1
chr1	227729706	227730219	0.375	0.272229696105007	0.4375	0.0625	0.5	0.222854814399865	16	0.000504149456388901	HyperHigh	*	*	*	InterGenic	*	*	*	*	*	*	*	*	CpG: 100	chr1	227729515	227730492	chr1	227729706	227730219	chr1:227730002-227730151	chr1	227730002	227730151	chr1	227730002	227730151	chr1-227729880:227730610	chr1	227729880	227730610	chr1	227729880	227730219	chr1-227730218:227730562	chr1	227730218	227730562	chr1
chr1	227746157	227749376	0.241657754010696	-0.053387542440047	0.85	0.53968253968254	0.468546354076522	0.518600262064762	101	8.74159998351361e-09	HyperHigh	*	*	*	InterGenic	*	*	*	*	*	*	*	*	CpG: 43	chr1	227748423	227748860	chr1	227748423	227748860	*	*	*	*	*	0	0	chr1-227748900:227749495	chr1	227748900	227749495	chr1	227748900	227749376	chr1-227748607:227749267	chr1	227748607	227749267	chr1
chr1	228075147	228075895	0.3125	-0.0347584872467009	0.6	0.363636363636364	0.550007473882785	0.5	24	4.755904881873e-05	HyperHigh	*	*	*	InterGenic	*	*	*	*	*	*	*	*	CpG: 32	chr1	228075377	228075750	chr1	228075377	228075750	chr1:228074836-228075224	chr1	228074836	228075224	chr1	228075147	228075224	chr1-228071845:228075835	chr1	228071845	228075835	chr1	228075147	228075835	chr1-228075598:228075848	chr1	228075598	228075848	chr1
chr1	228246875	228248354	0.103787878787879	0.222132854448552	0.224747474747474	0.0555555555555556	0.524373437530048	0.257742782841639	47	7.94810153928082e-05	HypoHigh	chr1	228246687	228248961	LastExon	+	WNT3A	protein_coding	chr1	228246875	228248354	1	0.650395778364116	CpG: 66	chr1	228246631	228247197	chr1	228246875	228247197	*	*	*	*	*	0	0	chr1-228248145:228248535	chr1	228248145	228248535	chr1	228248145	228248354	chr1-228248353:228248843	chr1	228248353	228248843	chr1
chr1	228576323	228579037	-0.00986842105263197	0.216674140549451	0.9375	0.952380952380952	0.385593216482346	0.130414521209752	36	0.0317489863668189	HypoHigh	*	*	*	InterGenic	*	*	*	*	*	*	*	*	*	*	*	*	*	0	0	*	*	*	*	*	0	0	chr1-228579000:228579175	chr1	228579000	228579175	chr1	228579000	228579037	chr1-228578997:228579237	chr1	228578997	228579237	chr1
chr1	228603644	228604184	0.12	0.210975499327283	0.176470588235294	0.05	0.452259883149013	0.270426041486378	22	0.0137949883219136	HypoHigh	chr1	228602779	228604239	Intron1	-	TRIM17	protein_coding	chr1	228603644	228604184	1	0.36986301369863	CpG: 75	chr1	228603706	228604567	chr1	228603706	228604184	*	*	*	*	*	0	0	chr1-228603925:228604855	chr1	228603925	228604855	chr1	228603925	228604184	chr1-228603997:228604317	chr1	228603997	228604317	chr1
chr1	228645507	228647018	0.1	0.223703046930032	0.142857142857143	0.0416666666666667	0.432931646898466	0.216674140549451	46	1.03013179026707e-06	HypoHigh	chr1	228645065	228645560	FirstExon	-	HIST3H2A	protein_coding	chr1	228645507	228645560	0.0350761085373925	0.107070707070707	CpG: 114	chr1	228645196	228646434	chr1	228645507	228645560	*	*	*	*	*	0	0	chr1-228644540:228645890	chr1	228644540	228645890	chr1	228645507	228645560	chr1-228645559:228645919	chr1	228645559	228645919	chr1
chr1	228645507	228647018	0.1	0.223703046930032	0.142857142857143	0.0416666666666667	0.432931646898466	0.216674140549451	46	1.03013179026707e-06	HypoHigh	chr1	228645561	228646561	Promoter	-	HIST3H2A	protein_coding	chr1	228645561	228646561	0.661813368630046	1	CpG: 114	chr1	228645196	228646434	chr1	228645561	228646434	*	*	*	*	*	0	0	chr1-228646540:228646770	chr1	228646540	228646770	chr1	228646540	228646561	chr1-228646482:228646738	chr1	228646482	228646738	chr1
chr1	228645507	228647018	0.1	0.223703046930032	0.142857142857143	0.0416666666666667	0.432931646898466	0.216674140549451	46	1.03013179026707e-06	HypoHigh	chr1	228644807	228645807	Promoter	+	HIST3H2BB	protein_coding	chr1	228645507	228645807	0.198544010589014	0.3	CpG: 114	chr1	228645196	228646434	chr1	228645507	228645807	*	*	*	*	*	0	0	chr1-228644540:228645890	chr1	228644540	228645890	chr1	228645507	228645807	chr1-228645756:228645888	chr1	228645756	228645888	chr1
chr1	228645507	228647018	0.1	0.223703046930032	0.142857142857143	0.0416666666666667	0.432931646898466	0.216674140549451	46	1.03013179026707e-06	HypoHigh	chr1	228645808	228646259	FirstExon	+	HIST3H2BB	protein_coding	chr1	228645808	228646259	0.298477829252151	1	CpG: 114	chr1	228645196	228646434	chr1	228645808	228646259	*	*	*	*	*	0	0	chr1-228646080:228646455	chr1	228646080	228646455	chr1	228646080	228646259	chr1-228646255:228646485	chr1	228646255	228646485	chr1
chr1	228651775	228653012	0.218253968253968	0.32941539942828	0.218253968253968	0	0.555112626396376	0.162042321394155	29	3.45888079345272e-06	HyperHigh	*	*	*	InterGenic	*	*	*	*	*	*	*	*	CpG: 84	chr1	228651447	228652529	chr1	228651775	228652529	*	*	*	*	*	0	0	chr1-228652925:228653175	chr1	228652925	228653175	chr1	228652925	228653012	chr1-228652603:228652963	chr1	228652603	228652963	chr1
chr1	228657006	228658516	0.233333333333333	0.062907291846955	0.636363636363636	0.285714285714286	0.612197222702993	0.523650198151556	40	3.19300054923041e-05	HyperHigh	*	*	*	InterGenic	*	*	*	*	*	*	*	*	CpG: 20	chr1	228657327	228657561	chr1	228657327	228657561	*	*	*	*	*	0	0	chr1-228657905:228658355	chr1	228657905	228658355	chr1	228657905	228658355	chr1-228657311:228657695	chr1	228657311	228657695	chr1
chr1	228785906	228786195	0.236842105263158	0.221679166426281	0.411764705882353	0.0526315789473684	0.640642698295787	0.331343403825652	12	0.039494186834188	HyperHigh	*	*	*	InterGenic	*	*	*	*	*	*	*	*	CpG: 17	chr1	228785986	228786204	chr1	228785986	228786195	*	*	*	*	*	0	0	chr1-228785860:228786235	chr1	228785860	228786235	chr1	228785906	228786195	chr1-228786015:228786295	chr1	228786015	228786295	chr1
chr1	229567126	229569825	0.25	0.324654095795232	0.357142857142857	0.0714285714285714	0.706026069783236	0.330358686612741	84	2.60455190400937e-14	HyperHigh	chr1	229566992	229567389	LastExon	-	ACTA1	protein_coding	chr1	229567126	229567389	0.0974434975917006	0.662468513853904	CpG: 245	chr1	229567206	229570684	chr1	229567206	229567389	*	*	*	*	*	0	0	chr1-229567385:229567535	chr1	229567385	229567535	chr1	229567385	229567389	chr1-229567202:229567466	chr1	229567202	229567466	chr1
chr1	229567126	229569825	0.25	0.324654095795232	0.357142857142857	0.0714285714285714	0.706026069783236	0.330358686612741	84	2.60455190400937e-14	HyperHigh	chr1	229567390	229567467	Intron6	-	ACTA1	protein_coding	chr1	229567390	229567467	0.0285290848462393	1	CpG: 245	chr1	229567206	229570684	chr1	229567390	229567467	*	*	*	*	*	0	0	chr1-229567385:229567535	chr1	229567385	229567535	chr1	229567390	229567467	chr1-229567202:229567466	chr1	229567202	229567466	chr1
chr1	229567126	229569825	0.25	0.324654095795232	0.357142857142857	0.0714285714285714	0.706026069783236	0.330358686612741	84	2.60455190400937e-14	HyperHigh	chr1	229567468	229567649	Exon6	-	ACTA1	protein_coding	chr1	229567468	229567649	0.0670618747684328	1	CpG: 245	chr1	229567206	229570684	chr1	229567468	229567649	*	*	*	*	*	0	0	chr1-229567545:229568375	chr1	229567545	229568375	chr1	229567545	229567649	chr1-229567583:229568287	chr1	229567583	229568287	chr1
chr1	229567126	229569825	0.25	0.324654095795232	0.357142857142857	0.0714285714285714	0.706026069783236	0.330358686612741	84	2.60455190400937e-14	HyperHigh	chr1	229567650	229567740	Intron5	-	ACTA1	protein_coding	chr1	229567650	229567740	0.0333456835865135	1	CpG: 245	chr1	229567206	229570684	chr1	229567650	229567740	*	*	*	*	*	0	0	chr1-229567545:229568375	chr1	229567545	229568375	chr1	229567650	229567740	chr1-229567583:229568287	chr1	229567583	229568287	chr1
chr1	229567126	229569825	0.25	0.324654095795232	0.357142857142857	0.0714285714285714	0.706026069783236	0.330358686612741	84	2.60455190400937e-14	HyperHigh	chr1	229567741	229567932	Exon5	-	ACTA1	protein_coding	chr1	229567741	229567932	0.0707669507224898	1	CpG: 245	chr1	229567206	229570684	chr1	229567741	229567932	*	*	*	*	*	0	0	chr1-229567545:229568375	chr1	229567545	229568375	chr1	229567741	229567932	chr1-229567864:229568320	chr1	229567864	229568320	chr1
chr1	229567126	229569825	0.25	0.324654095795232	0.357142857142857	0.0714285714285714	0.706026069783236	0.330358686612741	84	2.60455190400937e-14	HyperHigh	chr1	229567933	229568016	Intron4	-	ACTA1	protein_coding	chr1	229567933	229568016	0.0307521304186736	1	CpG: 245	chr1	229567206	229570684	chr1	229567933	229568016	*	*	*	*	*	0	0	chr1-229567545:229568375	chr1	229567545	229568375	chr1	229567933	229568016	chr1-229567864:229568320	chr1	229567864	229568320	chr1
chr1	229567126	229569825	0.25	0.324654095795232	0.357142857142857	0.0714285714285714	0.706026069783236	0.330358686612741	84	2.60455190400937e-14	HyperHigh	chr1	229568017	229568178	Exon4	-	ACTA1	protein_coding	chr1	229568017	229568178	0.0596517228603186	1	CpG: 245	chr1	229567206	229570684	chr1	229568017	229568178	*	*	*	*	*	0	0	chr1-229567545:229568375	chr1	229567545	229568375	chr1	229568017	229568178	chr1-229567864:229568320	chr1	229567864	229568320	chr1
chr1	229567126	229569825	0.25	0.324654095795232	0.357142857142857	0.0714285714285714	0.706026069783236	0.330358686612741	84	2.60455190400937e-14	HyperHigh	chr1	229568179	229568302	Intron3	-	ACTA1	protein_coding	chr1	229568179	229568302	0.0455724342349018	1	CpG: 245	chr1	229567206	229570684	chr1	229568179	229568302	*	*	*	*	*	0	0	chr1-229567545:229568375	chr1	229567545	229568375	chr1	229568179	229568302	chr1-229568292:229570655	chr1	229568292	229570655	chr1
chr1	229567126	229569825	0.25	0.324654095795232	0.357142857142857	0.0714285714285714	0.706026069783236	0.330358686612741	84	2.60455190400937e-14	HyperHigh	chr1	229568303	229568627	Exon3	-	ACTA1	protein_coding	chr1	229568303	229568627	0.120044460911449	1	CpG: 245	chr1	229567206	229570684	chr1	229568303	229568627	*	*	*	*	*	0	0	chr1-229568600:229568895	chr1	229568600	229568895	chr1	229568600	229568627	chr1-229568543:229570379	chr1	229568543	229570379	chr1
chr1	229567126	229569825	0.25	0.324654095795232	0.357142857142857	0.0714285714285714	0.706026069783236	0.330358686612741	84	2.60455190400937e-14	HyperHigh	chr1	229568628	229568733	Intron2	-	ACTA1	protein_coding	chr1	229568628	229568733	0.0389032975175991	1	CpG: 245	chr1	229567206	229570684	chr1	229568628	229568733	*	*	*	*	*	0	0	chr1-229568600:229568895	chr1	229568600	229568895	chr1	229568628	229568733	chr1-229568543:229570379	chr1	229568543	229570379	chr1
chr1	229567126	229569825	0.25	0.324654095795232	0.357142857142857	0.0714285714285714	0.706026069783236	0.330358686612741	84	2.60455190400937e-14	HyperHigh	chr1	229568734	229568874	Exon2	-	ACTA1	protein_coding	chr1	229568734	229568874	0.0518710633567988	1	CpG: 245	chr1	229567206	229570684	chr1	229568734	229568874	*	*	*	*	*	0	0	chr1-229568600:229568895	chr1	229568600	229568895	chr1	229568734	229568874	chr1-229568543:229570379	chr1	229568543	229570379	chr1
chr1	229567126	229569825	0.25	0.324654095795232	0.357142857142857	0.0714285714285714	0.706026069783236	0.330358686612741	84	2.60455190400937e-14	HyperHigh	chr1	229568875	229569750	Intron1	-	ACTA1	protein_coding	chr1	229568875	229569750	0.324194145979993	1	CpG: 245	chr1	229567206	229570684	chr1	229568875	229569750	*	*	*	*	*	0	0	chr1-229569565:229571175	chr1	229569565	229571175	chr1	229569565	229569750	chr1-229569676:229570056	chr1	229569676	229570056	chr1
chr1	229567126	229569825	0.25	0.324654095795232	0.357142857142857	0.0714285714285714	0.706026069783236	0.330358686612741	84	2.60455190400937e-14	HyperHigh	chr1	229569751	229569841	FirstExon	-	ACTA1	protein_coding	chr1	229569751	229569825	0.0274175620600222	0.822222222222222	CpG: 245	chr1	229567206	229570684	chr1	229569751	229569825	*	*	*	*	*	0	0	chr1-229569565:229571175	chr1	229569565	229571175	chr1	229569751	229569825	chr1-229569819:229570711	chr1	229569819	229570711	chr1
chr1	229702293	229703963	0.215488215488215	-0.155309495166773	0.736111111111111	0.424705882352941	0.476732473207378	0.639913555107174	13	0.04944895912472	HyperLow	*	*	*	InterGenic	*	*	*	*	*	*	*	*	*	*	*	*	*	0	0	*	*	*	*	*	0	0	chr1-229703280:229703510	chr1	229703280	229703510	chr1	229703280	229703510	chr1-229703423:229703501	chr1	229703423	229703501	chr1
chr1	230002235	230006435	0.0764705882352941	-0.270426041486378	0.941176470588235	0.866666666666667	0	0.385593216482346	32	0.0132349499189068	HypoLow	*	*	*	InterGenic	*	*	*	*	*	*	*	*	*	*	*	*	*	0	0	*	*	*	*	*	0	0	chr1-230006225:230006515	chr1	230006225	230006515	chr1	230006225	230006435	chr1-230005495:230005871	chr1	230005495	230005871	chr1
chr1	231004630	231004950	0.213903743315508	0.468546354076522	0.272727272727273	0.0526315789473684	0.583333333333333	0.123744108880292	10	0.00253225243997617	HyperHigh	chr1	231004558	231004661	Exon2	-	C1orf198	protein_coding	chr1	231004630	231004661	0.096875	0.300970873786408	CpG: 93	chr1	231003631	231004655	chr1	231004630	231004655	*	*	*	*	*	0	0	chr1-231002800:231005115	chr1	231002800	231005115	chr1	231004630	231004661	chr1-231004631:231005095	chr1	231004631	231005095	chr1
chr1	231004630	231004950	0.213903743315508	0.468546354076522	0.272727272727273	0.0526315789473684	0.583333333333333	0.123744108880292	10	0.00253225243997617	HyperHigh	chr1	231004662	231005227	Intron1	-	C1orf198	protein_coding	chr1	231004662	231004950	0.9	0.509734513274336	*	*	*	*	*	0	0	*	*	*	*	*	0	0	chr1-231002800:231005115	chr1	231002800	231005115	chr1	231004662	231004950	chr1-231004875:231005235	chr1	231004875	231005235	chr1
chr1	231298921	231299730	0.408963585434174	0.137035354658544	0.65	0.178571428571429	0.723650198151556	0.583333333333333	26	1.00421833274861e-06	HyperHigh	chr1	231297858	231299759	FirstExon	+	TRIM67	protein_coding	chr1	231298921	231299730	1	0.425565491846397	CpG: 209	chr1	231297812	231299777	chr1	231298921	231299730	*	*	*	*	*	0	0	chr1-231298825:231299995	chr1	231298825	231299995	chr1	231298921	231299730	chr1-231299472:231299868	chr1	231299472	231299868	chr1
chr1	232519074	232521390	-0.087121212121212	0.227034969599654	0.833333333333333	0.9375	0.45698353148489	0.222343476214566	31	0.00369225712126433	HypoHigh	*	*	*	InterGenic	*	*	*	*	*	*	*	*	*	*	*	*	*	0	0	*	*	*	*	*	0	0	chr1-232520920:232521270	chr1	232520920	232521270	chr1	232520920	232521270	chr1-232521029:232521265	chr1	232521029	232521265	chr1
chr1	232842521	232843195	-0.280375874125875	0.271816019277765	0.545454545454546	0.96875	0.400939843704928	0.228658419422619	7	0.090412064700097	HypoHigh	*	*	*	InterGenic	*	*	*	*	*	*	*	*	*	*	*	*	*	0	0	*	*	*	*	*	0	0	chr1-232843000:232843215	chr1	232843000	232843215	chr1	232843000	232843195	chr1-232842933:232843203	chr1	232842933	232843203	chr1
chr1	232941693	232941956	-0.377380952380952	-0.137389702249428	0.139423076923077	0.535714285714285	0.491102777938034	0.645356693300352	9	0.00272194902918454	HypoLow	chr1	232940643	232946092	FirstExon	+	MAP10	protein_coding	chr1	232941693	232941956	1	0.0482657368324463	CpG: 69	chr1	232941054	232941707	chr1	232941693	232941707	*	*	*	*	*	0	0	chr1-232941700:232942050	chr1	232941700	232942050	chr1	232941700	232941956	chr1-232941922:232942162	chr1	232941922	232942162	chr1
chr1	233059965	233063141	0.076923076923077	-0.240642698295787	0.952380952380952	0.866666666666667	0.146498995640504	0.382944951426972	26	0.000162846419417643	HypoLow	*	*	*	InterGenic	*	*	*	*	*	*	*	*	*	*	*	*	*	0	0	*	*	*	*	*	0	0	chr1-233062260:233062410	chr1	233062260	233062410	chr1	233062260	233062410	chr1-233061609:233061849	chr1	233061609	233061849	chr1
chr1	233749103	233751124	0.208455882352941	0.245489690348416	0.348484848484849	0.0769230769230769	0.591937120662593	0.255534369891082	55	1.31207519027769e-07	HyperHigh	chr1	233748749	233749749	Promoter	+	KCNK1	protein_coding	chr1	233749103	233749749	0.319643740722415	0.646	CpG: 71	chr1	233749373	233750314	chr1	233749373	233749749	*	*	*	*	*	0	0	chr1-233749440:233750275	chr1	233749440	233750275	chr1	233749440	233749749	chr1-233749644:233750533	chr1	233749644	233750533	chr1
chr1	233749103	233751124	0.208455882352941	0.245489690348416	0.348484848484849	0.0769230769230769	0.591937120662593	0.255534369891082	55	1.31207519027769e-07	HyperHigh	chr1	233749750	233750272	FirstExon	+	KCNK1	protein_coding	chr1	233749750	233750272	0.258287976249381	1	CpG: 71	chr1	233749373	233750314	chr1	233749750	233750272	*	*	*	*	*	0	0	chr1-233749440:233750275	chr1	233749440	233750275	chr1	233749750	233750272	chr1-233750240:233751439	chr1	233750240	233751439	chr1
chr1	233749103	233751124	0.208455882352941	0.245489690348416	0.348484848484849	0.0769230769230769	0.591937120662593	0.255534369891082	55	1.31207519027769e-07	HyperHigh	chr1	233750273	233802340	Intron1	+	KCNK1	protein_coding	chr1	233750273	233751124	0.4210786739238	0.016344325580502	CpG: 71	chr1	233749373	233750314	chr1	233750273	233750314	chr1:233750790-233751092	chr1	233750790	233751092	chr1	233750790	233751092	chr1-233750805:233751335	chr1	233750805	233751335	chr1	233750805	233751124	chr1-233751100:233751416	chr1	233751100	233751416	chr1
chr1	234040044	234041844	0.45079365079365	0.420841404004282	0.566964285714285	0.0816666666666667	0.702865540762873	0.286376966017784	49	1.00321951970844e-14	HyperHigh	chr1	234039678	234040678	Promoter	+	SLC35F3	protein_coding	chr1	234040044	234040678	0.352222222222222	0.634	CpG: 126	chr1	234040298	234041457	chr1	234040298	234040678	*	*	*	*	*	0	0	chr1-234040645:234041135	chr1	234040645	234041135	chr1	234040645	234040678	chr1-234040562:234042655	chr1	234040562	234042655	chr1
chr1	234040044	234041844	0.45079365079365	0.420841404004282	0.566964285714285	0.0816666666666667	0.702865540762873	0.286376966017784	49	1.00321951970844e-14	HyperHigh	chr1	234040679	234040876	FirstExon	+	SLC35F3	protein_coding	chr1	234040679	234040876	0.109444444444444	1	CpG: 126	chr1	234040298	234041457	chr1	234040679	234040876	*	*	*	*	*	0	0	chr1-234040645:234041135	chr1	234040645	234041135	chr1	234040679	234040876	chr1-234040866:234041646	chr1	234040866	234041646	chr1
chr1	234040044	234041844	0.45079365079365	0.420841404004282	0.566964285714285	0.0816666666666667	0.702865540762873	0.286376966017784	49	1.00321951970844e-14	HyperHigh	chr1	234040877	234041274	Intron1	+	SLC35F3	protein_coding	chr1	234040877	234041274	0.220555555555556	1	CpG: 126	chr1	234040298	234041457	chr1	234040877	234041274	*	*	*	*	*	0	0	chr1-234040645:234041135	chr1	234040645	234041135	chr1	234040877	234041135	chr1-234041038:234041363	chr1	234041038	234041363	chr1
chr1	234040044	234041844	0.45079365079365	0.420841404004282	0.566964285714285	0.0816666666666667	0.702865540762873	0.286376966017784	49	1.00321951970844e-14	HyperHigh	chr1	234041275	234041504	Exon2	+	SLC35F3	protein_coding	chr1	234041275	234041504	0.127222222222222	1	CpG: 126	chr1	234040298	234041457	chr1	234041275	234041457	*	*	*	*	*	0	0	chr1-234041360:234042035	chr1	234041360	234042035	chr1	234041360	234041504	chr1-234041038:234041363	chr1	234041038	234041363	chr1
chr1	234040044	234041844	0.45079365079365	0.420841404004282	0.566964285714285	0.0816666666666667	0.702865540762873	0.286376966017784	49	1.00321951970844e-14	HyperHigh	chr1	234041505	234367162	Intron2	+	SLC35F3	protein_coding	chr1	234041505	234041844	0.188333333333333	0.00104097255701551	*	*	*	*	*	0	0	*	*	*	*	*	0	0	chr1-234041360:234042035	chr1	234041360	234042035	chr1	234041505	234041844	chr1-234041027:234041537	chr1	234041027	234041537	chr1
chr1	234046900	234050309	0.122222222222222	-0.21301198418544	0.916666666666667	0.826086956521739	0.318144667641655	0.523650198151556	36	0.0128044544724995	HypoLow	chr1	234041505	234367162	Intron2	+	SLC35F3	protein_coding	chr1	234046900	234050309	1	0.0104680691647961	*	*	*	*	*	0	0	*	*	*	*	*	0	0	chr1-234050060:234050375	chr1	234050060	234050375	chr1	234050060	234050309	chr1-234049702:234050382	chr1	234049702	234050382	chr1
chr1	234492429	234493258	0.468762718762719	-0.104525575442237	0.875483870967742	0.347413793103448	0.331299087978808	0.432935619285689	21	1.41555848183737e-07	HyperLow	chr1	234491751	234492751	Promoter	+	RP5-827C21.2	antisense	chr1	234492429	234492751	0.388419782870929	0.322	CpG: 32	chr1	234492484	234492860	chr1	234492484	234492751	*	*	*	*	*	0	0	chr1-234492420:234492815	chr1	234492420	234492815	chr1	234492429	234492751	chr1-234492743:234492842	chr1	234492743	234492842	chr1
chr1	234492429	234493258	0.468762718762719	-0.104525575442237	0.875483870967742	0.347413793103448	0.331299087978808	0.432935619285689	21	1.41555848183737e-07	HyperLow	chr1	234492752	234492836	FirstExon	+	RP5-827C21.2	antisense	chr1	234492752	234492836	0.101326899879373	1	CpG: 32	chr1	234492484	234492860	chr1	234492752	234492836	*	*	*	*	*	0	0	chr1-234492420:234492815	chr1	234492420	234492815	chr1	234492752	234492815	chr1-234492743:234492842	chr1	234492743	234492842	chr1
chr1	234492429	234493258	0.468762718762719	-0.104525575442237	0.875483870967742	0.347413793103448	0.331299087978808	0.432935619285689	21	1.41555848183737e-07	HyperLow	chr1	234492837	234501249	Intron1	+	RP5-827C21.2	antisense	chr1	234492837	234493258	0.507840772014475	0.0500475511174513	CpG: 32	chr1	234492484	234492860	chr1	234492837	234492860	*	*	*	*	*	0	0	chr1-234492840:234493070	chr1	234492840	234493070	chr1	234492840	234493070	chr1-234492743:234492842	chr1	234492743	234492842	chr1
chr1	234611382	234611950	-0.310064935064935	0.289277661367932	0.322916666666667	0.641025641025641	0.679594526186154	0.425070684680537	11	0.0031742232317777	HypoHigh	chr1	234608558	234613918	Intron1	-	TARBP1	protein_coding	chr1	234611382	234611950	1	0.105970149253731	*	*	*	*	*	0	0	*	*	*	*	*	0	0	chr1-234611865:234612275	chr1	234611865	234612275	chr1	234611865	234611950	chr1-234611795:234612395	chr1	234611795	234612395	chr1
chr1	236849472	236850670	0.110906862745098	0.207655906804891	0.245215311004784	0	0.507765594049157	0.134176735655481	31	0.000292707935297432	HypoHigh	chr1	236848807	236849807	Promoter	+	ACTN2	protein_coding	chr1	236849472	236849807	0.279632721202003	0.335	CpG: 84	chr1	236849472	236850323	chr1	236849472	236849807	*	*	*	*	*	0	0	chr1-236849545:236850395	chr1	236849545	236850395	chr1	236849545	236849807	chr1-236849761:236850111	chr1	236849761	236850111	chr1
chr1	236849472	236850670	0.110906862745098	0.207655906804891	0.245215311004784	0	0.507765594049157	0.134176735655481	31	0.000292707935297432	HypoHigh	chr1	236849808	236850099	FirstExon	+	ACTN2	protein_coding	chr1	236849808	236850099	0.242904841402337	1	CpG: 84	chr1	236849472	236850323	chr1	236849808	236850099	*	*	*	*	*	0	0	chr1-236849545:236850395	chr1	236849545	236850395	chr1	236849808	236850099	chr1-236849996:236850346	chr1	236849996	236850346	chr1
chr1	236849472	236850670	0.110906862745098	0.207655906804891	0.245215311004784	0	0.507765594049157	0.134176735655481	31	0.000292707935297432	HypoHigh	chr1	236850100	236881157	Intron1	+	ACTN2	protein_coding	chr1	236850100	236850670	0.475792988313856	0.0183533502913997	CpG: 84	chr1	236849472	236850323	chr1	236850100	236850323	*	*	*	*	*	0	0	chr1-236850560:236850835	chr1	236850560	236850835	chr1	236850560	236850670	chr1-236850655:236851445	chr1	236850655	236851445	chr1
chr1	237204851	237206579	0.153846153846154	0.304618371113485	0.272727272727273	0.0434782608695652	0.4971048856788	0.181188147733199	54	1.99769669207478e-06	HypoHigh	chr1	237204504	237205504	Promoter	+	RYR2	protein_coding	chr1	237204851	237205504	0.377893518518519	0.653	CpG: 170	chr1	237205126	237206644	chr1	237205126	237205504	*	*	*	*	*	0	0	chr1-237205245:237205655	chr1	237205245	237205655	chr1	237205245	237205504	chr1-237205489:237205769	chr1	237205489	237205769	chr1
chr1	237204851	237206579	0.153846153846154	0.304618371113485	0.272727272727273	0.0434782608695652	0.4971048856788	0.181188147733199	54	1.99769669207478e-06	HypoHigh	chr1	237205505	237205869	FirstExon	+	RYR2	protein_coding	chr1	237205505	237205869	0.210648148148148	1	CpG: 170	chr1	237205126	237206644	chr1	237205505	237205869	*	*	*	*	*	0	0	chr1-237205705:237205995	chr1	237205705	237205995	chr1	237205705	237205869	chr1-237205824:237206294	chr1	237205824	237206294	chr1
chr1	237204851	237206579	0.153846153846154	0.304618371113485	0.272727272727273	0.0434782608695652	0.4971048856788	0.181188147733199	54	1.99769669207478e-06	HypoHigh	chr1	237205870	237433796	Intron1	+	RYR2	protein_coding	chr1	237205870	237206579	0.410300925925926	0.00311065872256785	CpG: 170	chr1	237205126	237206644	chr1	237205870	237206579	*	*	*	*	*	0	0	chr1-237206045:237207435	chr1	237206045	237207435	chr1	237206045	237206579	chr1-237206569:237206698	chr1	237206569	237206698	chr1
chr1	237560690	237564262	-0.055555555555556	0.206500297786364	0.888888888888889	1	0.45698353148489	0.181188147733199	24	0.0263417531842337	HypoHigh	chr1	237551484	237580348	Intron10	+	RYR2	protein_coding	chr1	237560690	237564262	1	0.123752771618625	*	*	*	*	*	0	0	*	*	*	*	*	0	0	chr1-237564025:237564175	chr1	237564025	237564175	chr1	237564025	237564175	chr1-237560773:237561013	chr1	237560773	237561013	chr1
chr1	239228084	239254308	0.0645833333333335	-0.208856700608239	1	0.9	0.16876000613148	0.328609144127516	95	7.25219214069336e-07	HypoLow	*	*	*	InterGenic	*	*	*	*	*	*	*	*	*	*	*	*	*	0	0	*	*	*	*	*	0	0	chr1-239250245:239250395	chr1	239250245	239250395	chr1	239250245	239250395	chr1-239247823:239248120	chr1	239247823	239248120	chr1
chr1	240160852	240161598	0.293040293040293	0.195111570162648	0.472222222222222	0.0833333333333333	0.581810768695428	0.317657164436031	25	8.95342432762381e-07	HyperHigh	*	*	*	InterGenic	*	*	*	*	*	*	*	*	CpG: 105	chr1	240160837	240161616	chr1	240160852	240161598	*	*	*	*	*	0	0	chr1-240161125:240161550	chr1	240161125	240161550	chr1	240161125	240161550	chr1-240161560:240161996	chr1	240161560	240161996	chr1
chr1	240257013	240257184	0.229166666666667	-0.34713268584052	0.866666666666667	0.466666666666667	0.240642698295787	0.63943194468483	10	0.0847671089767105	HyperLow	chr1	240255180	240257024	FirstExon	+	FMN2	protein_coding	chr1	240257013	240257024	0.064327485380117	0.00596529284164859	CpG: 194	chr1	240254959	240257063	chr1	240257013	240257024	*	*	*	*	*	0	0	chr1-240255600:240257370	chr1	240255600	240257370	chr1	240257013	240257024	chr1-240256940:240257616	chr1	240256940	240257616	chr1
chr1	240257013	240257184	0.229166666666667	-0.34713268584052	0.866666666666667	0.466666666666667	0.240642698295787	0.63943194468483	10	0.0847671089767105	HyperLow	chr1	240257025	240286478	Intron1	+	FMN2	protein_coding	chr1	240257025	240257184	0.929824561403509	0.00539843139917835	CpG: 194	chr1	240254959	240257063	chr1	240257025	240257063	*	*	*	*	*	0	0	chr1-240255600:240257370	chr1	240255600	240257370	chr1	240257025	240257184	chr1-240256940:240257616	chr1	240256940	240257616	chr1
chr1	240828590	240831013	0.073426573426573	-0.265188665691678	0.928571428571429	0.866666666666667	0.181188147733199	0.457213587395619	32	0.00618938086606664	HypoLow	*	*	*	InterGenic	*	*	*	*	*	*	*	*	*	*	*	*	*	0	0	*	*	*	*	*	0	0	chr1-240830705:240831195	chr1	240830705	240831195	chr1	240830705	240831013	chr1-240830715:240831042	chr1	240830715	240831042	chr1
chr1	240878802	240881541	0.089962121212121	-0.225579010017378	1	0.8625	0	0.327516148780901	27	0.00166697263914613	HypoLow	*	*	*	InterGenic	*	*	*	*	*	*	*	*	*	*	*	*	*	0	0	*	*	*	*	*	0	0	chr1-240880700:240880850	chr1	240880700	240880850	chr1	240880700	240880850	chr1-240881475:240882197	chr1	240881475	240882197	chr1
chr1	241308440	241315498	-0.087121212121212	0.204243135408736	0.866666666666667	0.942810457516339	0.441411941097516	0.240642698295787	51	0.00113087181648884	HypoHigh	chr1	241262063	241518998	Intron2	-	RGS7	protein_coding	chr1	241308440	241315498	1	0.0274699826804445	*	*	*	*	*	0	0	*	*	*	*	*	0	0	chr1-241310645:241310795	chr1	241310645	241310795	chr1	241310645	241310795	chr1-241312435:241313115	chr1	241312435	241313115	chr1
chr1	241519521	241520925	0.121323529411764	0.216299169769059	0.162280701754386	0	0.466297714315684	0.216674140549451	39	2.70919149382268e-05	HypoHigh	chr1	241519127	241520198	Intron1	-	RGS7	protein_coding	chr1	241519521	241520198	0.482193732193732	0.632119514472456	CpG: 89	chr1	241520103	241520790	chr1	241520103	241520198	*	*	*	*	*	0	0	chr1-241519385:241520695	chr1	241519385	241520695	chr1	241519521	241520198	chr1-241520134:241521013	chr1	241520134	241521013	chr1
chr1	241519521	241520925	0.121323529411764	0.216299169769059	0.162280701754386	0	0.466297714315684	0.216674140549451	39	2.70919149382268e-05	HypoHigh	chr1	241520199	241520530	FirstExon	-	RGS7	protein_coding	chr1	241520199	241520530	0.235754985754986	1	CpG: 89	chr1	241520103	241520790	chr1	241520199	241520530	*	*	*	*	*	0	0	chr1-241519385:241520695	chr1	241519385	241520695	chr1	241520199	241520530	chr1-241520439:241520652	chr1	241520439	241520652	chr1
chr1	241519521	241520925	0.121323529411764	0.216299169769059	0.162280701754386	0	0.466297714315684	0.216674140549451	39	2.70919149382268e-05	HypoHigh	chr1	241520531	241521531	Promoter	-	RGS7	protein_coding	chr1	241520531	241520925	0.280626780626781	0.394	CpG: 89	chr1	241520103	241520790	chr1	241520531	241520790	*	*	*	*	*	0	0	chr1-241519385:241520695	chr1	241519385	241520695	chr1	241520531	241520695	chr1-241520914:241521314	chr1	241520914	241521314	chr1
chr1	242614941	242616370	0.0606617647058825	-0.264986239473323	1	0.911111111111111	0	0.364947822875612	23	0.0116270952543978	HypoLow	chr1	242511545	242687389	Intron1	-	PLD5	protein_coding	chr1	242614941	242616370	1	0.00812652123473078	*	*	*	*	*	0	0	*	*	*	*	*	0	0	*	*	*	*	*	0	0	chr1-242615648:242615872	chr1	242615648	242615872	chr1
chr1	243053545	243054641	0.276315789473684	0	0.529411764705882	0.222222222222222	0.561938569717677	0.5	36	0.000287436787011932	HyperHigh	*	*	*	InterGenic	*	*	*	*	*	*	*	*	CpG: 43	chr1	243053597	243054072	chr1	243053597	243054072	*	*	*	*	*	0	0	chr1-243054345:243054635	chr1	243054345	243054635	chr1	243054345	243054635	chr1-243053896:243054042	chr1	243053896	243054042	chr1
chr1	243893828	243895499	-0.7	-0.219985462935166	0	0.818181818181818	0.216674140549451	0.417209722462608	20	2.27336574821934e-07	HypoLow	chr1	243859019	244006426	Intron1	-	AKT3	protein_coding	chr1	243893828	243895499	1	0.0113359609787866	*	*	*	*	*	0	0	chr1:243894639-243895081	chr1	243894639	243895081	chr1	243894639	243895081	chr1-243895380:243895690	chr1	243895380	243895690	chr1	243895380	243895499	chr1-243895273:243895637	chr1	243895273	243895637	chr1
chr1	243893828	243895499	-0.7	-0.219985462935166	0	0.818181818181818	0.216674140549451	0.417209722462608	20	2.27336574821934e-07	HypoLow	chr1	243866348	243902824	Intron2	-	RP11-370K11.1	sense_intronic	chr1	243893828	243895499	1	0.0458109441824762	*	*	*	*	*	0	0	chr1:243894639-243895081	chr1	243894639	243895081	chr1	243894639	243895081	chr1-243895380:243895690	chr1	243895380	243895690	chr1	243895380	243895499	chr1-243895273:243895637	chr1	243895273	243895637	chr1
chr1	245534202	245535410	-0.122377622377623	0.253453551494032	0.738636363636364	0.964285714285715	0.491469272620864	0.243550091017914	19	0.0613591906553965	HypoHigh	chr1	245530670	245582880	Intron3	+	KIF26B	protein_coding	chr1	245534202	245535410	1	0.0231373300134074	*	*	*	*	*	0	0	*	*	*	*	*	0	0	chr1-245534865:245535235	chr1	245534865	245535235	chr1	245534865	245535235	chr1-245534597:245534881	chr1	245534597	245534881	chr1
chr1	245691394	245691745	0.297975708502024	0.09189270428624	0.677083333333333	0.335664335664336	0.507351736291401	0.351396847575513	11	0.00219376357412373	HyperHigh	chr1	245583048	245704068	Intron4	+	KIF26B	protein_coding	chr1	245691394	245691745	1	0.00290034705007437	*	*	*	*	*	0	0	*	*	*	*	*	0	0	chr1-245691565:245691930	chr1	245691565	245691930	chr1	245691565	245691745	chr1-245691739:245692135	chr1	245691739	245692135	chr1
chr1	245710155	245710656	0.307142857142857	-0.0418243720275365	0.763636363636363	0.468627450980392	0.288262326418938	0.333333333333333	13	0.000727583413657811	HyperMid	chr1	245704253	245765878	Intron5	+	KIF26B	protein_coding	chr1	245710155	245710656	1	0.00812981744421907	*	*	*	*	*	0	0	*	*	*	*	*	0	0	chr1-245710285:245710515	chr1	245710285	245710515	chr1	245710285	245710515	chr1-245710190:245710610	chr1	245710190	245710610	chr1
chr1	246246279	246247619	-0.214285714285714	-0.197224259527442	0.125	0.277777777777778	0.328808909576947	0.554832593066821	18	0.000637512063642374	HypoLow	chr1	246093240	246490502	Intron5	-	SMYD3	protein_coding	chr1	246246279	246247619	1	0.00337308879278662	*	*	*	*	*	0	0	*	*	*	*	*	0	0	*	*	*	*	*	0	0	chr1-246246479:246246935	chr1	246246479	246246935	chr1
chr1	246758393	246764324	0.1	-0.225681240600673	1	0.894736842105263	0.228658419422619	0.444957589191678	37	0.000164041736678742	HypoLow	chr1	246755244	246784730	Intron2	+	CNST	protein_coding	chr1	246758393	246764324	1	0.201146306721834	*	*	*	*	*	0	0	chr1:246763574-246763751	chr1	246763574	246763751	chr1	246763574	246763751	chr1-246763925:246764195	chr1	246763925	246764195	chr1	246763925	246764195	chr1-246762726:246762938	chr1	246762726	246762938	chr1
chr1	246886932	246887324	0.145787545787545	0.257354020830781	0.58041958041958	0.0467391304347826	0.588652440316392	0.219089409872464	13	0.0971469793870087	HypoHigh	chr1	246886348	246887348	Promoter	+	SCCPDH	protein_coding	chr1	246886932	246887324	1	0.392	CpG: 68	chr1	246887264	246888028	chr1	246887264	246887324	*	*	*	*	*	0	0	chr1-246887240:246888455	chr1	246887240	246888455	chr1	246887240	246887324	chr1-246887305:246887798	chr1	246887305	246887798	chr1
chr1	247242196	247243106	-0.123809523809524	-0.328808909576947	0	0.142857142857143	0	0.425871145606372	18	0.000391488340220635	HypoLow	chr1	247242058	247243058	Promoter	-	ZNF670	protein_coding	chr1	247242196	247243058	0.947252747252747	0.862	CpG: 55	chr1	247241579	247242201	chr1	247242196	247242201	*	*	*	*	*	0	0	chr1-247242685:247243055	chr1	247242685	247243055	chr1	247242685	247243055	chr1-247242981:247243221	chr1	247242981	247243221	chr1
chr1	247608999	247609521	0.411904761904762	-0.094018540050628	0.817813765182186	0.425	0.308713891031344	0.464070425952623	9	0.00384992387045094	HyperHigh	chr1	247608124	247611706	Intron10	+	NLRP3	protein_coding	chr1	247608999	247609521	1	0.14572864321608	*	*	*	*	*	0	0	chr1:247608966-247609716	chr1	247608966	247609716	chr1	247608999	247609521	chr1-247609320:247609575	chr1	247609320	247609575	chr1	247609320	247609521	chr1-247609273:247609544	chr1	247609273	247609544	chr1
chr1	247693959	247694459	0.545454545454545	0.266801074613892	0.772727272727273	0.133333333333333	0.594719709283807	0.330421420178476	18	1.40207108605792e-05	HyperHigh	chr1	247690357	247712346	Intron2	+	GCSAML	protein_coding	chr1	247693959	247694459	1	0.0227386420482969	CpG: 51	chr1	247694035	247694501	chr1	247694035	247694459	*	*	*	*	*	0	0	chr1-247694025:247694495	chr1	247694025	247694495	chr1	247694025	247694459	chr1-247694166:247694590	chr1	247694166	247694590	chr1
chr1	247693959	247694459	0.545454545454545	0.266801074613892	0.772727272727273	0.133333333333333	0.594719709283807	0.330421420178476	18	1.40207108605792e-05	HyperHigh	chr1	247693434	247695842	LastExon	-	OR2C3	protein_coding	chr1	247693959	247694459	1	0.207641196013289	CpG: 51	chr1	247694035	247694501	chr1	247694035	247694459	*	*	*	*	*	0	0	chr1-247694025:247694495	chr1	247694025	247694495	chr1	247694025	247694459	chr1-247694166:247694590	chr1	247694166	247694590	chr1
chr1	248675447	248681294	0.220588235294118	-0.309381170205508	1	0.705882352941177	0	0.450548038384464	22	0.00615877150501029	HyperLow	*	*	*	InterGenic	*	*	*	*	*	*	*	*	*	*	*	*	*	0	0	*	*	*	*	*	0	0	*	*	*	*	*	0	0	*	*	*	*	*
chr2	45263	47233	0.211111111111111	0.330702360083587	0.285714285714286	0.0192307692307692	0.542357139597981	0.147135407315485	57	3.46290061362955e-12	HyperHigh	chr2	41628	45439	Intron1	-	FAM110C	protein_coding	chr2	45263	45439	0.0893401015228426	0.0461821044345316	*	*	*	*	*	0	0	*	*	*	*	*	0	0	chr2-44865:45775	chr2	44865	45775	chr2	45263	45439	chr2-45376:46403	chr2	45376	46403	chr2
chr2	45263	47233	0.211111111111111	0.330702360083587	0.285714285714286	0.0192307692307692	0.542357139597981	0.147135407315485	57	3.46290061362955e-12	HyperHigh	chr2	45440	46385	FirstExon	-	FAM110C	protein_coding	chr2	45440	46385	0.479695431472081	1	CpG: 124	chr2	45510	46559	chr2	45510	46385	*	*	*	*	*	0	0	chr2-45920:46355	chr2	45920	46355	chr2	45920	46355	chr2-46362:46507	chr2	46362	46507	chr2
chr2	45263	47233	0.211111111111111	0.330702360083587	0.285714285714286	0.0192307692307692	0.542357139597981	0.147135407315485	57	3.46290061362955e-12	HyperHigh	chr2	46386	47386	Promoter	-	FAM110C	protein_coding	chr2	46386	47233	0.42994923857868	0.847	CpG: 124	chr2	45510	46559	chr2	46386	46559	*	*	*	*	*	0	0	chr2-46465:47395	chr2	46465	47395	chr2	46465	47233	chr2-47160:47476	chr2	47160	47476	chr2
chr2	176606	186424	-0.071428571428571	0.213100732040172	0.818181818181818	0.916666666666667	0.45698353148489	0.181188147733199	38	0.0104910723841442	HypoHigh	*	*	*	InterGenic	*	*	*	*	*	*	*	*	*	*	*	*	*	0	0	*	*	*	*	*	0	0	chr2-185525:185675	chr2	185525	185675	chr2	185525	185675	chr2-185259:185529	chr2	185259	185529	chr2
chr2	443609	444008	0.318681318681319	0.163590625567103	0.5	0.0833333333333333	0.45698353148489	0.270426041486378	10	0.018972655941358	HyperHigh	*	*	*	InterGenic	*	*	*	*	*	*	*	*	*	*	*	*	*	0	0	*	*	*	*	*	0	0	chr2-443845:444010	chr2	443845	444010	chr2	443845	444008	chr2-443835:444053	chr2	443835	444053	chr2
chr2	468449	468754	0.233333333333333	0.286883323476076	0.352941176470588	0.0952380952380952	0.517032723669088	0.288618872485741	12	0.00591545005838887	HyperHigh	*	*	*	InterGenic	*	*	*	*	*	*	*	*	CpG: 79	chr2	467849	468659	chr2	468449	468659	*	*	*	*	*	0	0	chr2-468345:468695	chr2	468345	468695	chr2	468449	468695	chr2-468749:468907	chr2	468749	468907	chr2
chr2	924800	925245	-0.154621848739496	0.252910783467852	0.633928571428572	0.925133689839572	0.486382639009082	0.181188147733199	15	0.0123442275694136	HypoHigh	*	*	*	InterGenic	*	*	*	*	*	*	*	*	*	*	*	*	*	0	0	*	*	*	*	*	0	0	chr2-924805:925075	chr2	924805	925075	chr2	924805	925075	*	*	*	*	*
chr2	1163544	1165018	0.105263157894737	-0.20657238512341	1	0.863636363636364	0.146498995640504	0.474598313565133	28	0.000114549140379942	HypoLow	chr2	1161322	1168777	Intron7	+	SNTG2	protein_coding	chr2	1163544	1165018	1	0.197719651240778	CpG: 50	chr2	1163016	1163820	chr2	1163544	1163820	*	*	*	*	*	0	0	chr2-1164205:1165235	chr2	1164205	1165235	chr2	1164205	1165018	*	*	*	*	*
chr2	1286200	1286771	-0.209090909090909	-0.142302253131185	0.0625	0.25	0.24484330714649	0.402506249879807	16	0.0413714480947257	HypoLow	chr2	1271344	1312265	Intron14	+	SNTG2	protein_coding	chr2	1286200	1286771	1	0.0139537156960974	CpG: 20	chr2	1286393	1286642	chr2	1286393	1286642	*	*	*	*	*	0	0	chr2-1286385:1286630	chr2	1286385	1286630	chr2	1286385	1286630	chr2-1286459:1286823	chr2	1286459	1286823	chr2
chr2	1322649	1324620	0.105263157894737	-0.306098611351497	1	0.894736842105263	0	0.306098611351497	22	2.25159999574707e-05	HypoLow	chr2	1320148	1371114	Intron16	+	SNTG2	protein_coding	chr2	1322649	1324620	1	0.038672840717341	*	*	*	*	*	0	0	*	*	*	*	*	0	0	*	*	*	*	*	0	0	*	*	*	*	*
chr2	1543777	1544531	-0.5	0.20653955992337	0.416666666666667	0.894736842105263	0.5	0.216674140549451	26	1.83773512243264e-09	HypoHigh	chr2	1520755	1546192	Intron5	+	TPO	protein_coding	chr2	1543777	1544531	1	0.029641860282266	CpG: 19	chr2	1544272	1544489	chr2	1544272	1544489	*	*	*	*	*	0	0	chr2-1544225:1544555	chr2	1544225	1544555	chr2	1544225	1544531	chr2-1544196:1544680	chr2	1544196	1544680	chr2
chr2	1730256	1731356	0.108187134502924	-0.357506830071791	1	0.81547619047619	0.120765276943716	0.54740526270112	19	0.00441899108273599	HypoLow	chr2	1696907	1748027	Intron1	-	PXDN	protein_coding	chr2	1730256	1731356	1	0.0215179968701095	*	*	*	*	*	0	0	*	*	*	*	*	0	0	chr2-1731265:1731415	chr2	1731265	1731415	chr2	1731265	1731356	chr2-1730864:1731308	chr2	1730864	1731308	chr2
chr2	1746671	1749097	0.153846153846154	0.421263492952669	0.222222222222222	0	0.542229616567277	0.146498995640504	78	5.57478816577056e-18	HypoHigh	chr2	1696907	1748027	Intron1	-	PXDN	protein_coding	chr2	1746671	1748027	0.558944765045342	0.0265258215962441	CpG: 198	chr2	1746833	1748971	chr2	1746833	1748027	*	*	*	*	*	0	0	chr2-1747985:1748735	chr2	1747985	1748735	chr2	1747985	1748027	chr2-1748019:1748442	chr2	1748019	1748442	chr2
chr2	1746671	1749097	0.153846153846154	0.421263492952669	0.222222222222222	0	0.542229616567277	0.146498995640504	78	5.57478816577056e-18	HypoHigh	chr2	1748028	1748278	FirstExon	-	PXDN	protein_coding	chr2	1748028	1748278	0.103050288540808	1	CpG: 198	chr2	1746833	1748971	chr2	1748028	1748278	*	*	*	*	*	0	0	chr2-1747985:1748735	chr2	1747985	1748735	chr2	1748028	1748278	chr2-1748251:1748631	chr2	1748251	1748631	chr2
chr2	1746671	1749097	0.153846153846154	0.421263492952669	0.222222222222222	0	0.542229616567277	0.146498995640504	78	5.57478816577056e-18	HypoHigh	chr2	1748279	1749279	Promoter	-	PXDN	protein_coding	chr2	1748279	1749097	0.337180544105524	0.818	CpG: 198	chr2	1746833	1748971	chr2	1748279	1748971	*	*	*	*	*	0	0	chr2-1748945:1749095	chr2	1748945	1749095	chr2	1748945	1749095	chr2-1748305:1748414	chr2	1748305	1748414	chr2
chr2	2471786	2473200	-0.0909090909090911	0.240642698295787	0.875	0.894736842105263	0.45698353148489	0.216674140549451	16	0.240772911120861	HypoHigh	*	*	*	InterGenic	*	*	*	*	*	*	*	*	*	*	*	*	*	0	0	*	*	*	*	*	0	0	chr2-2472825:2472995	chr2	2472825	2472995	chr2	2472825	2472995	chr2-2472279:2472549	chr2	2472279	2472549	chr2
chr2	2617159	2617728	0.263888888888889	0.090393834625427	0.5	0.111111111111111	0.510164352252494	0.408131481801995	18	0.000359097666651774	HyperHigh	*	*	*	InterGenic	*	*	*	*	*	*	*	*	*	*	*	*	*	0	0	chr2:2617084-2617480	chr2	2617084	2617480	chr2	2617159	2617480	chr2-2617525:2617735	chr2	2617525	2617735	chr2	2617525	2617728	chr2-2617497:2617947	chr2	2617497	2617947	chr2
chr2	3750487	3751912	0.392080745341615	0.232978054049518	0.759310344827586	0.167832167832168	0.648662499625609	0.509442784577137	39	8.83128892117304e-10	HyperHigh	chr2	3750175	3750704	LastExon	-	AC010907.5	antisense	chr2	3750487	3750704	0.152280701754386	0.410207939508507	*	*	*	*	*	0	0	*	*	*	*	*	0	0	chr2-3750445:3750775	chr2	3750445	3750775	chr2	3750487	3750704	chr2-3750644:3751424	chr2	3750644	3751424	chr2
chr2	3750487	3751912	0.392080745341615	0.232978054049518	0.759310344827586	0.167832167832168	0.648662499625609	0.509442784577137	39	8.83128892117304e-10	HyperHigh	chr2	3750705	3751466	Intron1	-	AC010907.5	antisense	chr2	3750705	3751466	0.534035087719298	1	CpG: 125	chr2	3750828	3751927	chr2	3750828	3751466	*	*	*	*	*	0	0	chr2-3751025:3751955	chr2	3751025	3751955	chr2	3751025	3751466	chr2-3751313:3751633	chr2	3751313	3751633	chr2
chr2	3750487	3751912	0.392080745341615	0.232978054049518	0.759310344827586	0.167832167832168	0.648662499625609	0.509442784577137	39	8.83128892117304e-10	HyperHigh	chr2	3751467	3751743	FirstExon	-	AC010907.5	antisense	chr2	3751467	3751743	0.193684210526316	1	CpG: 125	chr2	3750828	3751927	chr2	3751467	3751743	*	*	*	*	*	0	0	chr2-3751025:3751955	chr2	3751025	3751955	chr2	3751467	3751743	chr2-3751658:3751898	chr2	3751658	3751898	chr2
chr2	3750487	3751912	0.392080745341615	0.232978054049518	0.759310344827586	0.167832167832168	0.648662499625609	0.509442784577137	39	8.83128892117304e-10	HyperHigh	chr2	3751744	3752744	Promoter	-	AC010907.5	antisense	chr2	3751744	3751912	0.117894736842105	0.168	CpG: 125	chr2	3750828	3751927	chr2	3751744	3751912	*	*	*	*	*	0	0	chr2-3751025:3751955	chr2	3751025	3751955	chr2	3751744	3751912	chr2-3751658:3751898	chr2	3751658	3751898	chr2
chr2	3826335	3827066	-0.517857142857143	-0.0915986246389261	0.263157894736842	0.739130434782609	0.501958751868036	0.591952982748214	16	3.30778674209302e-06	HypoHigh	chr2	3817002	3826405	Intron5	+	DCDC2C	protein_coding	chr2	3826335	3826405	0.0957592339261286	0.00744443262788472	*	*	*	*	*	0	0	*	*	*	*	*	0	0	*	*	*	*	*	0	0	*	*	*	*	*
chr2	3826335	3827066	-0.517857142857143	-0.0915986246389261	0.263157894736842	0.739130434782609	0.501958751868036	0.591952982748214	16	3.30778674209302e-06	HypoHigh	chr2	3826406	3826474	Exon6	+	DCDC2C	protein_coding	chr2	3826406	3826474	0.0930232558139535	1	*	*	*	*	*	0	0	*	*	*	*	*	0	0	chr2-3826425:3826730	chr2	3826425	3826730	chr2	3826425	3826474	*	*	*	*	*
chr2	3826335	3827066	-0.517857142857143	-0.0915986246389261	0.263157894736842	0.739130434782609	0.501958751868036	0.591952982748214	16	3.30778674209302e-06	HypoHigh	chr2	3826475	3832648	Intron6	+	DCDC2C	protein_coding	chr2	3826475	3827066	0.808481532147743	0.0957395107727199	*	*	*	*	*	0	0	*	*	*	*	*	0	0	chr2-3826740:3827075	chr2	3826740	3827075	chr2	3826740	3827066	*	*	*	*	*
chr2	5813360	5814240	0.213636363636364	0.272757242087054	0.415071770334928	0.0859649122807019	0.661291317807314	0.272229696105007	31	3.73349926737355e-05	HyperHigh	chr2	5742803	5831318	Intron1	-	AC107057.2	antisense	chr2	5813360	5814240	1	0.00994181777099926	CpG: 26	chr2	5813482	5813710	chr2	5813482	5813710	*	*	*	*	*	0	0	chr2-5813420:5814375	chr2	5813420	5814375	chr2	5813420	5814240	chr2-5814123:5814439	chr2	5814123	5814439	chr2
chr2	5813360	5814240	0.213636363636364	0.272757242087054	0.415071770334928	0.0859649122807019	0.661291317807314	0.272229696105007	31	3.73349926737355e-05	HyperHigh	chr2	5790044	5824557	Intron2	-	AC108025.2	antisense	chr2	5813360	5814240	1	0.0254976385709733	CpG: 26	chr2	5813482	5813710	chr2	5813482	5813710	*	*	*	*	*	0	0	chr2-5813420:5814375	chr2	5813420	5814375	chr2	5813420	5814240	chr2-5814123:5814439	chr2	5814123	5814439	chr2
chr2	5830798	5837928	0.363636363636364	0.306098611351497	0.454545454545455	0.0588235294117647	0.583333333333333	0.233280946628746	168	2.39811878564854e-33	HyperHigh	chr2	5742803	5831318	Intron1	-	AC107057.2	antisense	chr2	5830798	5831318	0.0729312762973352	0.00587471050104502	CpG: 24	chr2	5831187	5831413	chr2	5831187	5831318	*	*	*	*	*	0	0	chr2-5831265:5832235	chr2	5831265	5832235	chr2	5831265	5831318	chr2-5831307:5831951	chr2	5831307	5831951	chr2
chr2	5830798	5837928	0.363636363636364	0.306098611351497	0.454545454545455	0.0588235294117647	0.583333333333333	0.233280946628746	168	2.39811878564854e-33	HyperHigh	chr2	5831319	5831620	FirstExon	-	AC107057.2	antisense	chr2	5831319	5831620	0.0422159887798036	1	CpG: 24	chr2	5831187	5831413	chr2	5831319	5831413	*	*	*	*	*	0	0	chr2-5831265:5832235	chr2	5831265	5832235	chr2	5831319	5831620	chr2-5831595:5831788	chr2	5831595	5831788	chr2
chr2	5830798	5837928	0.363636363636364	0.306098611351497	0.454545454545455	0.0588235294117647	0.583333333333333	0.233280946628746	168	2.39811878564854e-33	HyperHigh	chr2	5831621	5832621	Promoter	-	AC107057.2	antisense	chr2	5831621	5832621	0.140252454417952	1	CpG: 192	chr2	5832041	5834208	chr2	5832041	5832621	*	*	*	*	*	0	0	chr2-5832585:5832735	chr2	5832585	5832735	chr2	5832585	5832621	chr2-5832611:5833131	chr2	5832611	5833131	chr2
chr2	5830798	5837928	0.363636363636364	0.306098611351497	0.454545454545455	0.0588235294117647	0.583333333333333	0.233280946628746	168	2.39811878564854e-33	HyperHigh	chr2	5824672	5831106	Intron1	-	AC108025.2	antisense	chr2	5830798	5831106	0.0431977559607293	0.047870686975443	*	*	*	*	*	0	0	*	*	*	*	*	0	0	chr2-5830900:5831110	chr2	5830900	5831110	chr2	5830900	5831106	chr2-5831099:5831479	chr2	5831099	5831479	chr2
chr2	5830798	5837928	0.363636363636364	0.306098611351497	0.454545454545455	0.0588235294117647	0.583333333333333	0.233280946628746	168	2.39811878564854e-33	HyperHigh	chr2	5831107	5831250	FirstExon	-	AC108025.2	antisense	chr2	5831107	5831250	0.0200561009817672	1	CpG: 24	chr2	5831187	5831413	chr2	5831187	5831250	*	*	*	*	*	0	0	chr2-5830900:5831110	chr2	5830900	5831110	chr2	5831107	5831110	chr2-5831246:5831975	chr2	5831246	5831975	chr2
chr2	5830798	5837928	0.363636363636364	0.306098611351497	0.454545454545455	0.0588235294117647	0.583333333333333	0.233280946628746	168	2.39811878564854e-33	HyperHigh	chr2	5831251	5832251	Promoter	-	AC108025.2	antisense	chr2	5831251	5832251	0.140252454417952	1	CpG: 192	chr2	5832041	5834208	chr2	5832041	5832251	*	*	*	*	*	0	0	chr2-5831265:5832235	chr2	5831265	5832235	chr2	5831265	5832235	chr2-5832139:5832376	chr2	5832139	5832376	chr2
chr2	5830798	5837928	0.363636363636364	0.306098611351497	0.454545454545455	0.0588235294117647	0.583333333333333	0.233280946628746	168	2.39811878564854e-33	HyperHigh	chr2	5831798	5832798	Promoter	+	SOX11	protein_coding	chr2	5831798	5832798	0.140252454417952	1	CpG: 192	chr2	5832041	5834208	chr2	5832041	5832798	*	*	*	*	*	0	0	chr2-5832740:5834235	chr2	5832740	5834235	chr2	5832740	5832798	chr2-5832785:5835392	chr2	5832785	5835392	chr2
chr2	5830798	5837928	0.363636363636364	0.306098611351497	0.454545454545455	0.0588235294117647	0.583333333333333	0.233280946628746	168	2.39811878564854e-33	HyperHigh	chr2	5832799	5841516	FirstExon	+	SOX11	protein_coding	chr2	5832799	5837928	0.719354838709677	0.588390501319261	CpG: 138	chr2	5836068	5837643	chr2	5836068	5837643	*	*	*	*	*	0	0	chr2-5837745:5838135	chr2	5837745	5838135	chr2	5837745	5837928	chr2-5837840:5838344	chr2	5837840	5838344	chr2
chr2	5830798	5837928	0.363636363636364	0.306098611351497	0.454545454545455	0.0588235294117647	0.583333333333333	0.233280946628746	168	2.39811878564854e-33	HyperHigh	chr2	5835351	5836351	Promoter	+	AC010729.1	3prime_overlapping_ncrna	chr2	5835351	5836351	0.140252454417952	1	CpG: 138	chr2	5836068	5837643	chr2	5836068	5836351	*	*	*	*	*	0	0	chr2-5835625:5837695	chr2	5835625	5837695	chr2	5835625	5836351	chr2-5836273:5836489	chr2	5836273	5836489	chr2
chr2	5830798	5837928	0.363636363636364	0.306098611351497	0.454545454545455	0.0588235294117647	0.583333333333333	0.233280946628746	168	2.39811878564854e-33	HyperHigh	chr2	5836352	5836425	FirstExon	+	AC010729.1	3prime_overlapping_ncrna	chr2	5836352	5836425	0.0102384291725105	1	CpG: 138	chr2	5836068	5837643	chr2	5836352	5836425	*	*	*	*	*	0	0	chr2-5835625:5837695	chr2	5835625	5837695	chr2	5836352	5836425	chr2-5836273:5836489	chr2	5836273	5836489	chr2
chr2	5830798	5837928	0.363636363636364	0.306098611351497	0.454545454545455	0.0588235294117647	0.583333333333333	0.233280946628746	168	2.39811878564854e-33	HyperHigh	chr2	5836426	5841597	Intron1	+	AC010729.1	3prime_overlapping_ncrna	chr2	5836426	5837928	0.210659186535764	0.290466060723264	CpG: 138	chr2	5836068	5837643	chr2	5836426	5837643	*	*	*	*	*	0	0	chr2-5837745:5838135	chr2	5837745	5838135	chr2	5837745	5837928	chr2-5837840:5838344	chr2	5837840	5838344	chr2
chr2	7181033	7182861	-0.105263157894737	0.328808909576947	0.894736842105263	1	0.396240625180289	0	18	0.000807893827665419	HypoHigh	chr2	7179760	7184313	LastExon	+	RNF144A	protein_coding	chr2	7181033	7182861	1	0.401493520755546	*	*	*	*	*	0	0	*	*	*	*	*	0	0	chr2-7182680:7182995	chr2	7182680	7182995	chr2	7182680	7182861	*	*	*	*	*
chr2	7568995	7569316	-0.475	-0.323650198151556	0.125	0.666666666666667	0.240642698295787	0.5	8	0.0213077106716282	HypoLow	chr2	7568674	7570003	Exon4	+	AC013460.1	processed_transcript	chr2	7568995	7569316	1	0.241534988713318	*	*	*	*	*	0	0	*	*	*	*	*	0	0	chr2-7569285:7569470	chr2	7569285	7569470	chr2	7569285	7569316	chr2-7569164:7569500	chr2	7569164	7569500	chr2
chr2	7985864	7993756	-0.0645833333333335	0.22525305668186	0.853571428571428	0.95	0.372643836278798	0.167752778258549	59	1.4911273825176e-05	HypoHigh	*	*	*	InterGenic	*	*	*	*	*	*	*	*	*	*	*	*	*	0	0	*	*	*	*	*	0	0	chr2-7989705:7989990	chr2	7989705	7989990	chr2	7989705	7989990	chr2-7993553:7993804	chr2	7993553	7993804	chr2
chr2	8502878	8504695	-0.176923076923077	0.323091381246613	0.745989304812834	1	0.552332233906472	0.135213020743189	15	0.0498646231038613	HypoHigh	*	*	*	InterGenic	*	*	*	*	*	*	*	*	*	*	*	*	*	0	0	*	*	*	*	*	0	0	chr2-8504465:8504615	chr2	8504465	8504615	chr2	8504465	8504615	chr2-8504679:8505228	chr2	8504679	8505228	chr2
chr2	8597176	8597907	-0.291666666666667	0.037551600630668	0.3	0.6	0.408131481801995	0.431820614746107	20	8.90100883400111e-05	HypoHigh	*	*	*	InterGenic	*	*	*	*	*	*	*	*	CpG: 61	chr2	8596907	8597573	chr2	8597176	8597573	chr2:8597253-8597584	chr2	8597253	8597584	chr2	8597253	8597584	chr2-8597725:8598115	chr2	8597725	8598115	chr2	8597725	8597907	chr2-8597885:8598115	chr2	8597885	8598115	chr2
chr2	9838071	9840385	0.083333333333333	-0.288618872485741	0.923076923076923	0.823529411764706	0.216674140549451	0.517032723669088	26	0.0411057652011376	HypoLow	chr2	9833697	9848229	Intron4	+	RP11-521D12.2	lincRNA	chr2	9838071	9840385	1	0.159234792182769	*	*	*	*	*	0	0	*	*	*	*	*	0	0	chr2-9840340:9840715	chr2	9840340	9840715	chr2	9840340	9840385	chr2-9839792:9840028	chr2	9839792	9840028	chr2
chr2	9897641	9898313	0.277777777777778	-0.209008031321242	0.857142857142857	0.5	0.382944951426972	0.63208020839343	20	7.32246877455712e-06	HyperLow	chr2	9897625	9899428	LastExon	-	RP11-521D12.5	lincRNA	chr2	9897641	9898313	1	0.372712146422629	*	*	*	*	*	0	0	*	*	*	*	*	0	0	chr2-9897905:9898375	chr2	9897905	9898375	chr2	9897905	9898313	chr2-9898191:9898431	chr2	9898191	9898431	chr2
chr2	10146540	10146913	0.485714285714286	0.202148214182692	0.722222222222222	0.16	0.694987500240385	0.478183046665067	12	0.00224949046557507	HyperHigh	chr2	10146159	10147159	Promoter	-	AC010969.1	antisense	chr2	10146540	10146913	1	0.373	*	*	*	*	*	0	0	*	*	*	*	*	0	0	chr2-10146845:10147335	chr2	10146845	10147335	chr2	10146845	10146913	chr2-10146892:10147047	chr2	10146892	10147047	chr2
chr2	10182842	10183270	0.429403929403929	0.338221291849592	0.502564102564103	0.0854545454545454	0.738847679008864	0.335532059237131	17	1.01642218471963e-05	HyperHigh	chr2	10182681	10183681	Promoter	+	KLF11	protein_coding	chr2	10182842	10183270	1	0.428	CpG: 183	chr2	10182635	10184702	chr2	10182842	10183270	*	*	*	*	*	0	0	chr2-10182385:10183335	chr2	10182385	10183335	chr2	10182842	10183270	chr2-10183259:10183769	chr2	10183259	10183769	chr2
chr2	10444801	10445646	-0.204545454545455	-0.285714285714286	0.0909090909090909	0.333333333333333	0.333333333333333	0.650275264839363	20	0.00258560583437013	HypoLow	chr2	10443304	10536960	Intron1	+	HPCAL1	protein_coding	chr2	10444801	10445646	1	0.00902237977278551	*	*	*	*	*	0	0	*	*	*	*	*	0	0	chr2-10445380:10445710	chr2	10445380	10445710	chr2	10445380	10445646	chr2-10445487:10445751	chr2	10445487	10445751	chr2
chr2	10635591	10636017	0.221428571428571	0.090835895098144	0.633333333333334	0.157894736842105	0.513214666242147	0.385213020743189	13	0.0239113666752928	HyperHigh	*	*	*	InterGenic	*	*	*	*	*	*	*	*	*	*	*	*	*	0	0	*	*	*	*	*	0	0	chr2-10635325:10636175	chr2	10635325	10636175	chr2	10635591	10636017	chr2-10635298:10635894	chr2	10635298	10635894	chr2
chr2	10890075	10892801	-0.051315789473684	0.293941128446154	0.851818181818182	1	0.414700603214922	0.0689694750506055	33	0.00829350307743126	HypoHigh	chr2	10866696	10894106	Intron3	+	ATP6V1C2	protein_coding	chr2	10890075	10892801	1	0.0994527544691718	*	*	*	*	*	0	0	*	*	*	*	*	0	0	chr2-10892465:10892735	chr2	10892465	10892735	chr2	10892465	10892735	chr2-10892557:10892957	chr2	10892557	10892957	chr2
chr2	11925124	11925374	0.210526315789474	0.256567438206294	0.466666666666667	0.125	0.65698353148489	0.331909150694975	12	0.0103523518412985	HyperHigh	chr2	11925012	11925202	Exon11	+	LPIN1	protein_coding	chr2	11925124	11925202	0.312	0.410526315789474	CpG: 29	chr2	11924983	11925253	chr2	11925124	11925202	*	*	*	*	*	0	0	chr2-11925100:11925450	chr2	11925100	11925450	chr2	11925124	11925202	chr2-11925102:11925386	chr2	11925102	11925386	chr2
chr2	11925124	11925374	0.210526315789474	0.256567438206294	0.466666666666667	0.125	0.65698353148489	0.331909150694975	12	0.0103523518412985	HyperHigh	chr2	11925203	11927199	Intron11	+	LPIN1	protein_coding	chr2	11925203	11925374	0.684	0.0856713426853707	CpG: 29	chr2	11924983	11925253	chr2	11925203	11925253	*	*	*	*	*	0	0	chr2-11925100:11925450	chr2	11925100	11925450	chr2	11925203	11925374	chr2-11925102:11925386	chr2	11925102	11925386	chr2
chr2	12858615	12859796	0.214285714285714	0.112134769027496	0.571428571428571	0.0666666666666667	0.328808909576947	0.306098611351497	28	0.000185745390342591	HyperHigh	chr2	12857015	12858703	FirstExon	+	TRIB2	protein_coding	chr2	12858615	12858703	0.0745131244707875	0.0521327014218009	CpG: 213	chr2	12856625	12859019	chr2	12858615	12858703	*	*	*	*	*	0	0	chr2-12858265:12859590	chr2	12858265	12859590	chr2	12858615	12858703	chr2-12858697:12859077	chr2	12858697	12859077	chr2
chr2	12858615	12859796	0.214285714285714	0.112134769027496	0.571428571428571	0.0666666666666667	0.328808909576947	0.306098611351497	28	0.000185745390342591	HyperHigh	chr2	12858704	12863385	Intron1	+	TRIB2	protein_coding	chr2	12858704	12859796	0.924640135478408	0.233283486434523	CpG: 213	chr2	12856625	12859019	chr2	12858704	12859019	*	*	*	*	*	0	0	chr2-12858265:12859590	chr2	12858265	12859590	chr2	12858704	12859590	chr2-12859793:12860182	chr2	12859793	12860182	chr2
chr2	12868385	12868928	0.378571428571429	0.1588864776792	0.527777777777778	0.0839160839160839	0.496846001985768	0.285216757684581	11	0.00575863053261433	HyperHigh	chr2	12863679	12880451	Intron2	+	TRIB2	protein_coding	chr2	12868385	12868928	1	0.0323753875506797	*	*	*	*	*	0	0	*	*	*	*	*	0	0	chr2-12868420:12868955	chr2	12868420	12868955	chr2	12868420	12868928	chr2-12868631:12868981	chr2	12868631	12868981	chr2
chr2	14026239	14038557	0.032738095238095	-0.212786957802777	0.9375	0.875	0.206460731559588	0.486382639009082	52	0.00188040259133026	HypoLow	*	*	*	InterGenic	*	*	*	*	*	*	*	*	*	*	*	*	*	0	0	*	*	*	*	*	0	0	*	*	*	*	*	0	0	chr2-14035371:14035647	chr2	14035371	14035647	chr2
chr2	14458039	14466792	-0.1125	0.208093032273111	0.837662337662338	0.933333333333333	0.471683085246986	0.306098611351497	33	0.00444815103668126	HypoHigh	chr2	14457228	14540966	Intron1	-	LINC00276	lincRNA	chr2	14458039	14466792	1	0.104528410040842	*	*	*	*	*	0	0	*	*	*	*	*	0	0	chr2-14465140:14465290	chr2	14465140	14465290	chr2	14465140	14465290	chr2-14466712:14467096	chr2	14466712	14467096	chr2
chr2	14772264	14775712	0.333333333333333	0.384818715494248	0.452991452991453	0.0769230769230769	0.640037321490309	0.228658419422619	99	1.87124448918308e-21	HyperHigh	chr2	14774214	14775214	Promoter	+	FAM84A	protein_coding	chr2	14774214	14775214	0.290023201856148	1	CpG: 244	chr2	14772377	14775809	chr2	14774214	14775214	*	*	*	*	*	0	0	chr2-14774085:14775255	chr2	14774085	14775255	chr2	14774214	14775214	chr2-14775169:14775598	chr2	14775169	14775598	chr2
chr2	14772264	14775712	0.333333333333333	0.384818715494248	0.452991452991453	0.0769230769230769	0.640037321490309	0.228658419422619	99	1.87124448918308e-21	HyperHigh	chr2	14775215	14775768	FirstExon	+	FAM84A	protein_coding	chr2	14775215	14775712	0.144141531322506	0.89873417721519	CpG: 244	chr2	14772377	14775809	chr2	14775215	14775712	*	*	*	*	*	0	0	chr2-14775320:14776055	chr2	14775320	14776055	chr2	14775320	14775712	chr2-14775695:14776011	chr2	14775695	14776011	chr2
chr2	15880703	15887583	-0.0909090909090911	0.222222222222222	0.818181818181818	0.941176470588235	0.482205555876069	0.216674140549451	36	0.0050292151867172	HypoHigh	chr2	15841500	15883612	Intron2	+	AC008271.1	protein_coding	chr2	15880703	15883612	0.42281976744186	0.0690776975683891	*	*	*	*	*	0	0	*	*	*	*	*	0	0	*	*	*	*	*	0	0	chr2-15883511:15884041	chr2	15883511	15884041	chr2
chr2	15880703	15887583	-0.0909090909090911	0.222222222222222	0.818181818181818	0.941176470588235	0.482205555876069	0.216674140549451	36	0.0050292151867172	HypoHigh	chr2	15883613	15883647	Exon3	+	AC008271.1	protein_coding	chr2	15883613	15883647	0.00494186046511628	1	*	*	*	*	*	0	0	*	*	*	*	*	0	0	*	*	*	*	*	0	0	chr2-15883511:15884041	chr2	15883511	15884041	chr2
chr2	15880703	15887583	-0.0909090909090911	0.222222222222222	0.818181818181818	0.941176470588235	0.482205555876069	0.216674140549451	36	0.0050292151867172	HypoHigh	chr2	15883648	15884349	Intron3	+	AC008271.1	protein_coding	chr2	15883648	15884349	0.101889534883721	1	*	*	*	*	*	0	0	*	*	*	*	*	0	0	*	*	*	*	*	0	0	chr2-15883511:15884041	chr2	15883511	15884041	chr2
chr2	15880703	15887583	-0.0909090909090911	0.222222222222222	0.818181818181818	0.941176470588235	0.482205555876069	0.216674140549451	36	0.0050292151867172	HypoHigh	chr2	15884350	15884463	LastExon	+	AC008271.1	protein_coding	chr2	15884350	15884463	0.0164244186046512	1	*	*	*	*	*	0	0	*	*	*	*	*	0	0	*	*	*	*	*	0	0	*	*	*	*	*
chr2	16421923	16423967	-0.122222222222222	0.309640763852832	0.822222222222223	0.972222222222222	0.425070684680537	0.146498995640504	15	0.00551898759555668	HypoHigh	*	*	*	InterGenic	*	*	*	*	*	*	*	*	*	*	*	*	*	0	0	chr2:16421806-16421992	chr2	16421806	16421992	chr2	16421923	16421992	*	*	*	*	*	0	0	chr2-16421746:16421986	chr2	16421746	16421986	chr2
chr2	19095782	19104114	-0.083333333333333	0.255726487724281	0.8	0.923076923076923	0.468546354076522	0.240642698295787	34	0.0117985139570781	HypoHigh	*	*	*	InterGenic	*	*	*	*	*	*	*	*	*	*	*	*	*	0	0	*	*	*	*	*	0	0	chr2-19103580:19103855	chr2	19103580	19103855	chr2	19103580	19103855	chr2-19101995:19102379	chr2	19101995	19102379	chr2
chr2	19612768	19616700	0.0631410256410255	-0.32910400855057	1	0.936858974358975	0	0.366672633791991	19	2.54707845705449e-05	HypoLow	*	*	*	InterGenic	*	*	*	*	*	*	*	*	*	*	*	*	*	0	0	*	*	*	*	*	0	0	chr2-19616645:19616795	chr2	19616645	19616795	chr2	19616645	19616700	chr2-19616609:19616849	chr2	19616609	19616849	chr2
chr2	19627095	19641786	0.045454545454545	-0.262375528733756	1	0.894736842105263	0.15633186452976	0.417209722462608	62	0.00176358970682064	HypoLow	*	*	*	InterGenic	*	*	*	*	*	*	*	*	*	*	*	*	*	0	0	chr2:19628762-19628784	chr2	19628762	19628784	chr2	19628762	19628784	chr2-19637940:19638090	chr2	19637940	19638090	chr2	19637940	19638090	chr2-19639744:19640224	chr2	19639744	19640224	chr2
chr2	20345514	20345950	0.641258741258741	-0.035672569865119	0.883116883116883	0.227272727272727	0.270426041486378	0.306098611351497	9	0.00090685675099235	HyperMid	*	*	*	InterGenic	*	*	*	*	*	*	*	*	*	*	*	*	*	0	0	chr2:20345416-20345679	chr2	20345416	20345679	chr2	20345514	20345679	chr2-20345420:20345935	chr2	20345420	20345935	chr2	20345514	20345935	chr2-20345777:20345892	chr2	20345777	20345892	chr2
chr2	20385089	20386590	-0.181818181818182	-0.306098611351497	0.1	0.333333333333333	0.306098611351497	0.5	16	0.0443302082669819	HypoLow	*	*	*	InterGenic	*	*	*	*	*	*	*	*	*	*	*	*	*	0	0	chr2:20386283-20386578	chr2	20386283	20386578	chr2	20386283	20386578	chr2-20386540:20386715	chr2	20386540	20386715	chr2	20386540	20386590	chr2-20386489:20386993	chr2	20386489	20386993	chr2
chr2	20647513	20647921	0.505952380952381	0.308475653521173	0.553571428571428	0.0961098398169337	0.631424941747685	0.257742782841639	15	1.25035371019665e-05	HyperHigh	chr2	20646835	20649200	FirstExon	+	RHOB	protein_coding	chr2	20647513	20647921	1	0.172515856236786	CpG: 158	chr2	20646428	20647988	chr2	20647513	20647921	*	*	*	*	*	0	0	chr2-20647045:20648575	chr2	20647045	20648575	chr2	20647513	20647921	chr2-20647864:20648120	chr2	20647864	20648120	chr2
chr2	20810954	20811582	0.412121212121212	0.064995833413461	0.7	0.2	0.611309072547277	0.417209722462608	12	0.00100606056162483	HyperHigh	*	*	*	InterGenic	*	*	*	*	*	*	*	*	*	*	*	*	*	0	0	chr2:20811186-20811439	chr2	20811186	20811439	chr2	20811186	20811439	chr2-20811060:20811555	chr2	20811060	20811555	chr2	20811060	20811555	chr2-20811339:20812059	chr2	20811339	20812059	chr2
chr2	20867448	20867660	0.364145658263305	0.468428096690818	0.411764705882353	0.05	0.80646064854879	0.315457645328481	8	0.0174825174825175	HyperHigh	chr2	20867391	20870223	Intron1	+	GDF7	protein_coding	chr2	20867448	20867660	1	0.0748587570621469	CpG: 214	chr2	20865289	20867589	chr2	20867448	20867589	*	*	*	*	*	0	0	chr2-20864905:20869175	chr2	20864905	20869175	chr2	20867448	20867660	chr2-20867623:20868499	chr2	20867623	20868499	chr2
chr2	23132429	23138449	-0.015873015873016	0.213420254714876	0.861904761904762	0.916666666666667	0.444957589191678	0.240642698295787	45	0.0242068538268108	HypoHigh	*	*	*	InterGenic	*	*	*	*	*	*	*	*	*	*	*	*	*	0	0	*	*	*	*	*	0	0	chr2-23133845:23133995	chr2	23133845	23133995	chr2	23133845	23133995	chr2-23135396:23135549	chr2	23135396	23135549	chr2
chr2	24271438	24272272	0.222222222222222	0.017234208955844	0.571428571428571	0.363636363636364	0.486382639009082	0.518203253755189	16	0.048714105260772	HyperHigh	chr2	24271570	24272570	Promoter	+	FKBP1B	protein_coding	chr2	24271570	24272272	0.841726618705036	0.702	*	*	*	*	*	0	0	*	*	*	*	*	0	0	chr2-24271700:24272170	chr2	24271700	24272170	chr2	24271700	24272170	chr2-24272265:24272735	chr2	24272265	24272735	chr2
[truncated: 9,357 more rows]
[truncated: 2 more columns]

## Sheet: README
The table reports DMRs identified in sample UD10 at Relapse vs Tumor (first diagnosis). For each DMR we report all the fields of the annotated PoreMeth2 output as documented on GitHub (https://github.com/Lab-CoMBINE/PoreMeth2).
