# Supplementary material for: PoreMeth2 for decoding the evolution of methylome alterations with nanopore sequencing
Source: HighWire-hosted journal article supplement (doi:10.1101/gr.280259.124), 2025-10-20
Supplement: Supplemental_Table_3.xlsx [file Supplemental_Table_3.xlsx]

## Sheet: DMRs_AML2_Rel_vs_AML2_Tum
chr	start	end	DeltaBeta	DeltaEntropy	BetaRel	BetaTum	EntropyRel	EntropyTum	NumCpG	PValue	Class	chr.GenCode	start.GenCode	end.GenCode	feature.GenCode	strand.GenCode	symbol.GenCode	type.GenCode	chr.GenCode.overlap	start.GenCode.overlap	end.GenCode.overlap	ratio1.GenCode.overlap	ratio2.GenCode.overlap	name.CGI	chr.CGI	start.CGI	end.CGI	chr.CGI.overlap	start.CGI.overlap	end.CGI.overlap	name.Enhancer	chr.Enhancer	start.Enhancer	end.Enhancer	chr.Enhancer.overlap	start.Enhancer.overlap	end.Enhancer.overlap	name.DNASE	chr.DNASE	start.DNASE	end.DNASE	chr.DNASE.overlap	start.DNASE.overlap	end.DNASE.overlap	name.TFBS	chr.TFBS	start.TFBS	end.TFBS	chr.TFBS.overlap
chr1	933387	934136	0.133928571428571	0.209797278016774	0.25	0.0476190476190476	0.5	0.288618872485741	26	0.0293189655218208	HypoHigh	chr1	931346	933431	FirstExon	-	RP11-54O7.17	lincRNA	chr1	933387	933431	0.0587449933244326	0.0211031175059952	CpG: 413	chr1	933387	937410	chr1	933387	933431	*	*	*	*	*	0	0	chr1-933080:933810	chr1	933080	933810	chr1	933387	933431	chr1-933316:933840	chr1	933316	933840	chr1
chr1	933387	934136	0.133928571428571	0.209797278016774	0.25	0.0476190476190476	0.5	0.288618872485741	26	0.0293189655218208	HypoHigh	chr1	933432	934432	Promoter	-	RP11-54O7.17	lincRNA	chr1	933432	934136	0.939919893190921	0.704	CpG: 413	chr1	933387	937410	chr1	933432	934136	*	*	*	*	*	0	0	chr1-933880:935235	chr1	933880	935235	chr1	933880	934136	chr1-934082:934882	chr1	934082	934882	chr1
chr1	1008446	1009502	0.222222222222222	-0.183659166810897	1	0.75	0.216674140549451	0.5	24	2.00278072790012e-06	HyperLow	chr1	1007956	1009395	Intron1	-	RNF223	protein_coding	chr1	1008446	1009395	0.898674242424242	0.65948575399583	*	*	*	*	*	0	0	chr1:1008722-1008886	chr1	1008722	1008886	chr1	1008722	1008886	chr1-1009105:1009975	chr1	1009105	1009975	chr1	1009105	1009395	chr1-1009357:1009917	chr1	1009357	1009917	chr1
chr1	1008446	1009502	0.222222222222222	-0.183659166810897	1	0.75	0.216674140549451	0.5	24	2.00278072790012e-06	HyperLow	chr1	1009396	1009687	FirstExon	-	RNF223	protein_coding	chr1	1009396	1009502	0.100378787878788	0.36426116838488	*	*	*	*	*	0	0	*	*	*	*	*	0	0	chr1-1009105:1009975	chr1	1009105	1009975	chr1	1009396	1009502	chr1-1009494:1009850	chr1	1009494	1009850	chr1
chr1	1116868	1117890	-0.213815789473684	-0.278353410252211	0.153846153846154	0.466666666666667	0.306098611351497	0.61412366439237	28	0.00488256013296451	HypoLow	chr1	1116241	1117120	Intron8	+	TTLL10	protein_coding	chr1	1116868	1117120	0.246575342465753	0.286689419795222	*	*	*	*	*	0	0	*	*	*	*	*	0	0	chr1-1116865:1117975	chr1	1116865	1117975	chr1	1116868	1117120	chr1-1116838:1117218	chr1	1116838	1117218	chr1
chr1	1116868	1117890	-0.213815789473684	-0.278353410252211	0.153846153846154	0.466666666666667	0.306098611351497	0.61412366439237	28	0.00488256013296451	HypoLow	chr1	1117121	1117195	Exon9	+	TTLL10	protein_coding	chr1	1117121	1117195	0.0724070450097847	1	*	*	*	*	*	0	0	*	*	*	*	*	0	0	chr1-1116865:1117975	chr1	1116865	1117975	chr1	1117121	1117195	chr1-1116838:1117218	chr1	1116838	1117218	chr1
chr1	1116868	1117890	-0.213815789473684	-0.278353410252211	0.153846153846154	0.466666666666667	0.306098611351497	0.61412366439237	28	0.00488256013296451	HypoLow	chr1	1117196	1117740	Intron9	+	TTLL10	protein_coding	chr1	1117196	1117740	0.532289628180039	1	*	*	*	*	*	0	0	*	*	*	*	*	0	0	chr1-1116865:1117975	chr1	1116865	1117975	chr1	1117196	1117740	chr1-1117212:1117788	chr1	1117212	1117788	chr1
chr1	1116868	1117890	-0.213815789473684	-0.278353410252211	0.153846153846154	0.466666666666667	0.306098611351497	0.61412366439237	28	0.00488256013296451	HypoLow	chr1	1117741	1117826	Exon10	+	TTLL10	protein_coding	chr1	1117741	1117826	0.0831702544031311	1	*	*	*	*	*	0	0	*	*	*	*	*	0	0	chr1-1116865:1117975	chr1	1116865	1117975	chr1	1117741	1117826	chr1-1117212:1117788	chr1	1117212	1117788	chr1
chr1	1116868	1117890	-0.213815789473684	-0.278353410252211	0.153846153846154	0.466666666666667	0.306098611351497	0.61412366439237	28	0.00488256013296451	HypoLow	chr1	1117827	1118255	Intron10	+	TTLL10	protein_coding	chr1	1117827	1117890	0.0616438356164384	0.147196261682243	*	*	*	*	*	0	0	*	*	*	*	*	0	0	chr1-1116865:1117975	chr1	1116865	1117975	chr1	1117827	1117890	*	*	*	*	*
chr1	1181692	1182447	0.215686274509804	0.144222552984722	0.409090909090909	0.125	0.607689327424554	0.459472950906775	28	0.000307984836761496	HyperHigh	chr1	1179878	1181893	Intron1	-	FAM132A	protein_coding	chr1	1181692	1181893	0.266225165562914	0.0997518610421836	CpG: 81	chr1	1181756	1182470	chr1	1181756	1181893	*	*	*	*	*	0	0	chr1-1181705:1182695	chr1	1181705	1182695	chr1	1181705	1181893	chr1-1181841:1182474	chr1	1181841	1182474	chr1
chr1	1181692	1182447	0.215686274509804	0.144222552984722	0.409090909090909	0.125	0.607689327424554	0.459472950906775	28	0.000307984836761496	HyperHigh	chr1	1181894	1182102	FirstExon	-	FAM132A	protein_coding	chr1	1181894	1182102	0.275496688741722	1	CpG: 81	chr1	1181756	1182470	chr1	1181894	1182102	*	*	*	*	*	0	0	chr1-1181705:1182695	chr1	1181705	1182695	chr1	1181894	1182102	chr1-1182067:1183031	chr1	1182067	1183031	chr1
chr1	1181692	1182447	0.215686274509804	0.144222552984722	0.409090909090909	0.125	0.607689327424554	0.459472950906775	28	0.000307984836761496	HyperHigh	chr1	1182103	1183103	Promoter	-	FAM132A	protein_coding	chr1	1182103	1182447	0.455629139072848	0.344	CpG: 81	chr1	1181756	1182470	chr1	1182103	1182447	*	*	*	*	*	0	0	chr1-1181705:1182695	chr1	1181705	1182695	chr1	1182103	1182447	chr1-1182421:1183021	chr1	1182421	1183021	chr1
chr1	1244470	1244825	0.0627450980392157	0.325765386136737	0.075	0	0.598673618138967	0.18920620363032	13	0.0150168770190502	HypoHigh	chr1	1244466	1244653	Exon3	+	PUSL1	protein_coding	chr1	1244470	1244653	0.515492957746479	0.978609625668449	CpG: 281	chr1	1242400	1245185	chr1	1244470	1244653	*	*	*	*	*	0	0	chr1-1242500:1245395	chr1	1242500	1245395	chr1	1244470	1244653	chr1-1244612:1245334	chr1	1244612	1245334	chr1
chr1	1244470	1244825	0.0627450980392157	0.325765386136737	0.075	0	0.598673618138967	0.18920620363032	13	0.0150168770190502	HypoHigh	chr1	1244654	1244833	Intron3	+	PUSL1	protein_coding	chr1	1244654	1244825	0.48169014084507	0.955307262569832	CpG: 281	chr1	1242400	1245185	chr1	1244654	1244825	*	*	*	*	*	0	0	chr1-1242500:1245395	chr1	1242500	1245395	chr1	1244654	1244825	chr1-1244821:1245754	chr1	1244821	1245754	chr1
chr1	1361665	1363090	0.214229691876751	0.124169605097646	0.514705882352941	0.270979020979021	0.566444187489916	0.409509117036967	39	0.000185801653847463	HyperHigh	chr1	1361508	1361765	FirstExon	+	TMEM88B	protein_coding	chr1	1361665	1361765	0.0701754385964912	0.389105058365759	CpG: 20	chr1	1361560	1361787	chr1	1361665	1361765	*	*	*	*	*	0	0	chr1-1361625:1362250	chr1	1361625	1362250	chr1	1361665	1361765	chr1-1361319:1361860	chr1	1361319	1361860	chr1
chr1	1361665	1363090	0.214229691876751	0.124169605097646	0.514705882352941	0.270979020979021	0.566444187489916	0.409509117036967	39	0.000185801653847463	HyperHigh	chr1	1361766	1362933	Intron1	+	TMEM88B	protein_coding	chr1	1361766	1362933	0.818947368421053	1	CpG: 20	chr1	1361560	1361787	chr1	1361766	1361787	*	*	*	*	*	0	0	chr1-1362700:1363075	chr1	1362700	1363075	chr1	1362700	1362933	chr1-1362926:1363242	chr1	1362926	1363242	chr1
chr1	1361665	1363090	0.214229691876751	0.124169605097646	0.514705882352941	0.270979020979021	0.566444187489916	0.409509117036967	39	0.000185801653847463	HyperHigh	chr1	1362934	1363167	LastExon	+	TMEM88B	protein_coding	chr1	1362934	1363090	0.109473684210526	0.669527896995708	CpG: 50	chr1	1362954	1363299	chr1	1362954	1363090	*	*	*	*	*	0	0	chr1-1363085:1363450	chr1	1363085	1363450	chr1	1363085	1363090	chr1-1363086:1363798	chr1	1363086	1363798	chr1
chr1	1411578	1412633	0.076923076923077	-0.216674140549451	1	0.916666666666667	0	0.320412201574292	30	0.00895124350290067	HypoLow	chr1	1407470	1412653	Intron1	+	ATAD3B	protein_coding	chr1	1411578	1412633	1	0.203550067528458	*	*	*	*	*	0	0	*	*	*	*	*	0	0	*	*	*	*	*	0	0	chr1-1412601:1413012	chr1	1412601	1413012	chr1
chr1	1475161	1476321	0.38974358974359	0.135065410995988	0.5	0.142857142857143	0.421033862297183	0.329615164877711	45	2.33615759742145e-09	HyperHigh	chr1	1475064	1475170	Exon2	-	TMEM240	protein_coding	chr1	1475161	1475170	0.00775862068965517	0.0849056603773585	CpG: 32	chr1	1474962	1475220	chr1	1475161	1475170	*	*	*	*	*	0	0	chr1-1474560:1476135	chr1	1474560	1476135	chr1	1475161	1475170	chr1-1474999:1475283	chr1	1474999	1475283	chr1
chr1	1475161	1476321	0.38974358974359	0.135065410995988	0.5	0.142857142857143	0.421033862297183	0.329615164877711	45	2.33615759742145e-09	HyperHigh	chr1	1475171	1475669	Intron1	-	TMEM240	protein_coding	chr1	1475171	1475669	0.429310344827586	1	CpG: 32	chr1	1474962	1475220	chr1	1475171	1475220	*	*	*	*	*	0	0	chr1-1474560:1476135	chr1	1474560	1476135	chr1	1475171	1475669	chr1-1475308:1476149	chr1	1475308	1476149	chr1
chr1	1475161	1476321	0.38974358974359	0.135065410995988	0.5	0.142857142857143	0.421033862297183	0.329615164877711	45	2.33615759742145e-09	HyperHigh	chr1	1475670	1475737	FirstExon	-	TMEM240	protein_coding	chr1	1475670	1475737	0.0577586206896552	1	*	*	*	*	*	0	0	*	*	*	*	*	0	0	chr1-1474560:1476135	chr1	1474560	1476135	chr1	1475670	1475737	chr1-1475725:1476321	chr1	1475725	1476321	chr1
chr1	1475161	1476321	0.38974358974359	0.135065410995988	0.5	0.142857142857143	0.421033862297183	0.329615164877711	45	2.33615759742145e-09	HyperHigh	chr1	1475738	1476738	Promoter	-	TMEM240	protein_coding	chr1	1475738	1476321	0.502586206896552	0.583	CpG: 55	chr1	1476093	1476669	chr1	1476093	1476321	*	*	*	*	*	0	0	chr1-1476205:1476935	chr1	1476205	1476935	chr1	1476205	1476321	chr1-1476308:1476984	chr1	1476308	1476984	chr1
chr1	1549665	1550150	0.375	-0.0370753653260181	0.8	0.304347826086957	0.542229616567277	0.483886921452589	12	0.00426263663367284	HyperHigh	chr1	1549138	1551175	FirstExon	-	RP11-345P4.9	antisense	chr1	1549665	1550150	1	0.238095238095238	*	*	*	*	*	0	0	*	*	*	*	*	0	0	chr1-1549565:1550250	chr1	1549565	1550250	chr1	1549665	1550150	chr1-1550099:1550495	chr1	1550099	1550495	chr1
chr1	1549665	1550150	0.375	-0.0370753653260181	0.8	0.304347826086957	0.542229616567277	0.483886921452589	12	0.00426263663367284	HyperHigh	chr1	1549794	1550794	Promoter	+	MIB2	protein_coding	chr1	1549794	1550150	0.734020618556701	0.356	*	*	*	*	*	0	0	*	*	*	*	*	0	0	chr1-1549565:1550250	chr1	1549565	1550250	chr1	1549794	1550150	chr1-1550099:1550495	chr1	1550099	1550495	chr1
chr1	1564421	1565540	0.309462915601023	-0.149417236488864	0.91304347826087	0.571428571428571	0.293168820270669	0.507309364962454	38	1.41977408650172e-10	HyperLow	chr1	1564103	1564512	Intron16	+	MIB2	protein_coding	chr1	1564421	1564512	0.0813226094727435	0.222493887530562	CpG: 470	chr1	1564421	1570006	chr1	1564421	1564512	*	*	*	*	*	0	0	chr1-1564425:1564735	chr1	1564425	1564735	chr1	1564425	1564512	chr1-1564492:1564907	chr1	1564492	1564907	chr1
chr1	1564421	1565540	0.309462915601023	-0.149417236488864	0.91304347826087	0.571428571428571	0.293168820270669	0.507309364962454	38	1.41977408650172e-10	HyperLow	chr1	1564513	1564691	Exon17	+	MIB2	protein_coding	chr1	1564513	1564691	0.159070598748883	1	CpG: 470	chr1	1564421	1570006	chr1	1564513	1564691	*	*	*	*	*	0	0	chr1-1564425:1564735	chr1	1564425	1564735	chr1	1564513	1564691	chr1-1564604:1565184	chr1	1564604	1565184	chr1
chr1	1564421	1565540	0.309462915601023	-0.149417236488864	0.91304347826087	0.571428571428571	0.293168820270669	0.507309364962454	38	1.41977408650172e-10	HyperLow	chr1	1564692	1564764	Intron17	+	MIB2	protein_coding	chr1	1564692	1564764	0.064343163538874	1	CpG: 470	chr1	1564421	1570006	chr1	1564692	1564764	*	*	*	*	*	0	0	chr1-1564425:1564735	chr1	1564425	1564735	chr1	1564692	1564735	chr1-1564731:1565327	chr1	1564731	1565327	chr1
chr1	1564421	1565540	0.309462915601023	-0.149417236488864	0.91304347826087	0.571428571428571	0.293168820270669	0.507309364962454	38	1.41977408650172e-10	HyperLow	chr1	1564765	1564946	Exon18	+	MIB2	protein_coding	chr1	1564765	1564946	0.161751563896336	1	CpG: 470	chr1	1564421	1570006	chr1	1564765	1564946	*	*	*	*	*	0	0	chr1-1564825:1565955	chr1	1564825	1565955	chr1	1564825	1564946	chr1-1564886:1565091	chr1	1564886	1565091	chr1
chr1	1564421	1565540	0.309462915601023	-0.149417236488864	0.91304347826087	0.571428571428571	0.293168820270669	0.507309364962454	38	1.41977408650172e-10	HyperLow	chr1	1564947	1565018	Intron18	+	MIB2	protein_coding	chr1	1564947	1565018	0.063449508489723	1	CpG: 470	chr1	1564421	1570006	chr1	1564947	1565018	*	*	*	*	*	0	0	chr1-1564825:1565955	chr1	1564825	1565955	chr1	1564947	1565018	chr1-1564886:1565091	chr1	1564886	1565091	chr1
chr1	1564421	1565540	0.309462915601023	-0.149417236488864	0.91304347826087	0.571428571428571	0.293168820270669	0.507309364962454	38	1.41977408650172e-10	HyperLow	chr1	1565019	1565084	Exon19	+	MIB2	protein_coding	chr1	1565019	1565084	0.0580875781948168	1	CpG: 470	chr1	1564421	1570006	chr1	1565019	1565084	*	*	*	*	*	0	0	chr1-1564825:1565955	chr1	1564825	1565955	chr1	1565019	1565084	chr1-1564886:1565091	chr1	1564886	1565091	chr1
chr1	1564421	1565540	0.309462915601023	-0.149417236488864	0.91304347826087	0.571428571428571	0.293168820270669	0.507309364962454	38	1.41977408650172e-10	HyperLow	chr1	1565085	1565671	Intron19	+	MIB2	protein_coding	chr1	1565085	1565540	0.406613047363718	0.776450511945392	CpG: 470	chr1	1564421	1570006	chr1	1565085	1565540	*	*	*	*	*	0	0	chr1-1564825:1565955	chr1	1564825	1565955	chr1	1565085	1565540	chr1-1565522:1566106	chr1	1565522	1566106	chr1
chr1	1655040	1655270	0.218181818181818	0.116870330927866	0.375	0.111111111111111	0.45698353148489	0.323650198151556	12	0.0038115908866658	HyperHigh	chr1	1654271	1655696	Intron1	-	CDK11A	protein_coding	chr1	1655040	1655270	1	0.16140350877193	*	*	*	*	*	0	0	*	*	*	*	*	0	0	*	*	*	*	*	0	0	*	*	*	*	*
chr1	1655040	1655270	0.218181818181818	0.116870330927866	0.375	0.111111111111111	0.45698353148489	0.323650198151556	12	0.0038115908866658	HyperHigh	chr1	1654271	1666128	Intron2	-	RP1-283E3.8	processed_transcript	chr1	1655040	1655270	1	0.0193978240701695	*	*	*	*	*	0	0	*	*	*	*	*	0	0	*	*	*	*	*	0	0	*	*	*	*	*
chr1	1655040	1655270	0.218181818181818	0.116870330927866	0.375	0.111111111111111	0.45698353148489	0.323650198151556	12	0.0038115908866658	HyperHigh	chr1	1655053	1656053	Promoter	+	RP1-283E3.4	pseudogene	chr1	1655053	1655270	0.943478260869565	0.217	*	*	*	*	*	0	0	*	*	*	*	*	0	0	*	*	*	*	*	0	0	*	*	*	*	*
chr1	1690234	1690791	0.164880952380952	-0.271017111767611	0.854166666666667	0.714285714285714	0.359512229910011	0.61465718243315	21	0.000284930798674704	HypoLow	chr1	1688750	1690539	Intron5	-	NADK	protein_coding	chr1	1690234	1690539	0.547576301615799	0.170486305198435	*	*	*	*	*	0	0	*	*	*	*	*	0	0	chr1-1690225:1690595	chr1	1690225	1690595	chr1	1690234	1690539	chr1-1690509:1690813	chr1	1690509	1690813	chr1
chr1	1690234	1690791	0.164880952380952	-0.271017111767611	0.854166666666667	0.714285714285714	0.359512229910011	0.61465718243315	21	0.000284930798674704	HypoLow	chr1	1690540	1690682	Exon5	-	NADK	protein_coding	chr1	1690540	1690682	0.254937163375224	1	*	*	*	*	*	0	0	*	*	*	*	*	0	0	chr1-1690600:1690655	chr1	1690600	1690655	chr1	1690600	1690655	chr1-1690562:1691205	chr1	1690562	1691205	chr1
chr1	1690234	1690791	0.164880952380952	-0.271017111767611	0.854166666666667	0.714285714285714	0.359512229910011	0.61465718243315	21	0.000284930798674704	HypoLow	chr1	1690683	1691172	Intron4	-	NADK	protein_coding	chr1	1690683	1690791	0.193895870736086	0.220858895705521	*	*	*	*	*	0	0	*	*	*	*	*	0	0	chr1-1690725:1690890	chr1	1690725	1690890	chr1	1690725	1690791	chr1-1690749:1691159	chr1	1690749	1691159	chr1
chr1	1714041	1714869	0.230463980463981	0.029846660548749	0.576923076923076	0.187643020594966	0.488652440316391	0.421178952790122	19	0.0208763914866154	HyperHigh	*	*	*	InterGenic	*	*	*	*	*	*	*	*	CpG: 45	chr1	1713639	1714141	chr1	1714041	1714141	chr1:1714020-1714715	chr1	1714020	1714715	chr1	1714041	1714715	chr1-1713785:1715135	chr1	1713785	1715135	chr1	1714041	1714869	chr1-1714675:1715099	chr1	1714675	1715099	chr1
chr1	1791359	1793629	0.123764822134387	-0.207931028708414	0.909090909090909	0.8125	0.306098611351497	0.583352286613666	23	0.0363573796651287	HypoLow	chr1	1770678	1822258	Intron1	-	GNB1	protein_coding	chr1	1791359	1793629	1	0.044009305932532	*	*	*	*	*	0	0	*	*	*	*	*	0	0	chr1-1793580:1793855	chr1	1793580	1793855	chr1	1793580	1793629	chr1-1793485:1793761	chr1	1793485	1793761	chr1
chr1	1949969	1950544	0.213636363636364	0.042084094359571	0.543154761904762	0.303030303030303	0.63495402717342	0.61664713009524	19	0.0381975566508234	HyperHigh	chr1	1949779	1950779	Promoter	+	GABRD	protein_coding	chr1	1949969	1950544	1	0.575	CpG: 117	chr1	1950411	1951479	chr1	1950411	1950544	*	*	*	*	*	0	0	chr1-1949845:1953995	chr1	1949845	1953995	chr1	1949969	1950544	chr1-1950507:1951686	chr1	1950507	1951686	chr1
chr1	2120718	2121664	0.25563909774436	-0.024970787306704	0.666666666666667	0.380952380952381	0.41088675227194	0.453654682481227	34	1.82679786988279e-06	HyperHigh	chr1	2120987	2121220	LastExon	-	C1orf86	protein_coding	chr1	2120987	2121220	0.24630021141649	1	CpG: 55	chr1	2121017	2121818	chr1	2121017	2121220	*	*	*	*	*	0	0	chr1-2120905:2121270	chr1	2120905	2121270	chr1	2120987	2121220	chr1-2121208:2121484	chr1	2121208	2121484	chr1
chr1	2120718	2121664	0.25563909774436	-0.024970787306704	0.666666666666667	0.380952380952381	0.41088675227194	0.453654682481227	34	1.82679786988279e-06	HyperHigh	chr1	2121221	2125077	Intron7	-	C1orf86	protein_coding	chr1	2121221	2121664	0.468287526427061	0.114885892116183	CpG: 55	chr1	2121017	2121818	chr1	2121221	2121664	*	*	*	*	*	0	0	chr1-2121365:2121775	chr1	2121365	2121775	chr1	2121365	2121664	chr1-2121633:2121889	chr1	2121633	2121889	chr1
chr1	2162472	2164698	0.2	-0.337263285938176	1	0.777777777777778	0.197224259527442	0.583333333333333	48	1.18629217142853e-09	-	chr1	2161175	2234416	Intron1	+	SKI	protein_coding	chr1	2162472	2164698	1	0.0303928127688044	*	*	*	*	*	0	0	chr1:2162325-2162996	chr1	2162325	2162996	chr1	2162472	2162996	chr1-2163960:2164670	chr1	2163960	2164670	chr1	2163960	2164670	chr1-2164536:2164940	chr1	2164536	2164940	chr1
chr1	2203566	2207238	0.0745614035087719	-0.21340214445349	1	0.894736842105263	0	0.315220101533547	68	6.27266195190285e-08	HypoLow	chr1	2161175	2234416	Intron1	+	SKI	protein_coding	chr1	2203566	2207238	1	0.0501358528692945	*	*	*	*	*	0	0	*	*	*	*	*	0	0	chr1-2206605:2206915	chr1	2206605	2206915	chr1	2206605	2206915	chr1-2207184:2207680	chr1	2207184	2207680	chr1
chr1	2474388	2475774	0.207967836257309	-0.0258585285062045	0.759615384615385	0.480769230769231	0.493191319504541	0.517575274693036	29	0.00456354219844432	HyperHigh	*	*	*	InterGenic	*	*	*	*	*	*	*	*	*	*	*	*	*	0	0	*	*	*	*	*	0	0	chr1-2475600:2475750	chr1	2475600	2475750	chr1	2475600	2475750	chr1-2475708:2476335	chr1	2475708	2476335	chr1
chr1	2509993	2510375	-0.286029411764706	0.057713139499857	0.192156862745098	0.623529411764706	0.5458220498496	0.40084865387299	9	0.035556231642398	HypoHigh	*	*	*	InterGenic	*	*	*	*	*	*	*	*	*	*	*	*	*	0	0	chr1:2509702-2510198	chr1	2509702	2510198	chr1	2509993	2510198	chr1-2510260:2510410	chr1	2510260	2510410	chr1	2510260	2510375	chr1-2510015:2510415	chr1	2510015	2510415	chr1
chr1	2560266	2560994	0.258986928104575	0.114175883373955	0.416666666666667	0.105555555555555	0.600626562469952	0.388139592342579	21	0.0120800667243669	HyperHigh	chr1	2543644	2560769	Intron2	-	MMEL1	protein_coding	chr1	2560266	2560769	0.690934065934066	0.0293722627737226	CpG: 96	chr1	2559892	2561055	chr1	2560266	2560769	*	*	*	*	*	0	0	chr1-2560725:2560775	chr1	2560725	2560775	chr1	2560725	2560769	chr1-2560197:2561101	chr1	2560197	2561101	chr1
chr1	2560266	2560994	0.258986928104575	0.114175883373955	0.416666666666667	0.105555555555555	0.600626562469952	0.388139592342579	21	0.0120800667243669	HyperHigh	chr1	2560770	2560960	Exon2	-	MMEL1	protein_coding	chr1	2560770	2560960	0.260989010989011	1	CpG: 96	chr1	2559892	2561055	chr1	2560770	2560960	*	*	*	*	*	0	0	chr1-2560780:2561235	chr1	2560780	2561235	chr1	2560780	2560960	chr1-2560197:2561101	chr1	2560197	2561101	chr1
chr1	2560266	2560994	0.258986928104575	0.114175883373955	0.416666666666667	0.105555555555555	0.600626562469952	0.388139592342579	21	0.0120800667243669	HyperHigh	chr1	2560961	2564304	Intron1	-	MMEL1	protein_coding	chr1	2560961	2560994	0.0453296703296703	0.00987137301824708	CpG: 96	chr1	2559892	2561055	chr1	2560961	2560994	*	*	*	*	*	0	0	chr1-2560780:2561235	chr1	2560780	2561235	chr1	2560961	2560994	chr1-2560197:2561101	chr1	2560197	2561101	chr1
chr1	2706212	2706930	0.287194055944056	-0.14137699913004	0.73030303030303	0.449519230769231	0.503654682481227	0.597068387611763	27	0.00016585551766065	HyperLow	chr1	2702498	2717335	Intron2	-	TTC34	protein_coding	chr1	2706212	2706930	1	0.0483925321830559	CpG: 111	chr1	2706025	2706961	chr1	2706212	2706930	*	*	*	*	*	0	0	chr1-2706905:2707055	chr1	2706905	2707055	chr1	2706905	2706930	chr1-2706110:2706343	chr1	2706110	2706343	chr1
chr1	2764198	2764754	0.4	0.214152942904075	0.636363636363636	0.136363636363636	0.584238426326568	0.350993858376756	18	2.42236866540208e-05	HyperHigh	*	*	*	InterGenic	*	*	*	*	*	*	*	*	*	*	*	*	*	0	0	*	*	*	*	*	0	0	chr1-2764240:2764430	chr1	2764240	2764430	chr1	2764240	2764430	chr1-2764554:2764957	chr1	2764554	2764957	chr1
chr1	2844769	2848001	0.068965517241379	-0.21340214445349	0.933333333333333	0.870967741935484	0.240642698295787	0.486382639009082	74	7.7874582370391e-05	HypoLow	*	*	*	InterGenic	*	*	*	*	*	*	*	*	CpG: 19	chr1	2847056	2847288	chr1	2847056	2847288	*	*	*	*	*	0	0	chr1-2847605:2847795	chr1	2847605	2847795	chr1	2847605	2847795	chr1-2847492:2848285	chr1	2847492	2848285	chr1
chr1	3028782	3029107	-0.1	0.353759374819711	0.866666666666667	1	0.452259883149013	0	12	0.0127178079859604	HypoHigh	chr1	2985861	3102688	Intron1	+	PRDM16	protein_coding	chr1	3028782	3029107	1	0.00278189117241734	*	*	*	*	*	0	0	*	*	*	*	*	0	0	chr1-3029005:3029235	chr1	3029005	3029235	chr1	3029005	3029107	*	*	*	*	*
chr1	3051800	3052038	0.3	0.32043285330089	0.5	0.266666666666667	0.706026069783236	0.385593216482346	8	0.0242295587456873	HyperHigh	chr1	2985861	3102688	Intron1	+	PRDM16	protein_coding	chr1	3051800	3052038	1	0.00203720030472408	*	*	*	*	*	0	0	*	*	*	*	*	0	0	chr1-3051940:3052195	chr1	3051940	3052195	chr1	3051940	3052038	chr1-3051917:3052361	chr1	3051917	3052361	chr1
chr1	3091155	3092000	0.136936592818946	0.21651681525214	0.176470588235294	0.0611888111888112	0.43386298981536	0.18920620363032	19	0.0107005713407966	HypoHigh	chr1	2985861	3102688	Intron1	+	PRDM16	protein_coding	chr1	3091155	3092000	1	0.00723291704828507	*	*	*	*	*	0	0	*	*	*	*	*	0	0	chr1-3091485:3091975	chr1	3091485	3091975	chr1	3091485	3091975	chr1-3091425:3091783	chr1	3091425	3091783	chr1
chr1	3204578	3207151	0.111111111111111	-0.283325859450549	1	0.857142857142857	0	0.417209722462608	40	4.66976163908005e-06	HypoLow	chr1	3160702	3301715	Intron3	+	PRDM16	protein_coding	chr1	3204578	3207151	1	0.01824654464482	*	*	*	*	*	0	0	*	*	*	*	*	0	0	chr1-3207065:3207215	chr1	3207065	3207215	chr1	3207065	3207151	chr1-3206747:3207397	chr1	3206747	3207397	chr1
chr1	3266822	3267275	-0.3125	0.117055048573028	0.5	0.75	0.5	0.382944951426972	8	0.0150820346748684	HypoHigh	chr1	3160702	3301715	Intron3	+	PRDM16	protein_coding	chr1	3266822	3267275	1	0.0032124697722905	*	*	*	*	*	0	0	*	*	*	*	*	0	0	chr1-3267020:3267335	chr1	3267020	3267335	chr1	3267020	3267275	chr1-3267080:3267664	chr1	3267080	3267664	chr1
chr1	3353864	3354359	0.107142857142857	-0.226572748347719	0.916666666666667	0.821428571428571	0.288618872485741	0.5	12	0.048207390023631	HypoLow	chr1	3350241	3355185	LastExon	+	PRDM16	protein_coding	chr1	3353864	3354359	1	0.100121359223301	*	*	*	*	*	0	0	*	*	*	*	*	0	0	chr1-3353740:3353890	chr1	3353740	3353890	chr1	3353864	3353890	*	*	*	*	*
chr1	3537190	3539865	0.063405797101449	-0.23004541721229	0.9375	0.783625730994152	0	0.425070684680537	39	0.0301116290310716	HypoLow	chr1	3539754	3540120	LastExon	-	RP11-46F15.2	antisense	chr1	3539754	3539865	0.0414953271028037	0.30327868852459	*	*	*	*	*	0	0	*	*	*	*	*	0	0	*	*	*	*	*	0	0	chr1-3539441:3539925	chr1	3539441	3539925	chr1
chr1	3574271	3575101	0.119047619047619	-0.278406350095526	0.9375	0.730769230769231	0.240642698295787	0.459594497828725	22	0.0262818808685318	HypoLow	chr1	3569206	3598896	Intron1	+	TP73	protein_coding	chr1	3574271	3575101	1	0.0279555405860559	*	*	*	*	*	0	0	*	*	*	*	*	0	0	chr1-3575045:3575195	chr1	3575045	3575195	chr1	3575045	3575101	chr1-3574855:3575139	chr1	3574855	3575139	chr1
chr1	3646580	3647369	0.351648351648352	0.271349417417776	0.715686274509804	0.077037037037037	0.569082963200077	0.325361576366418	19	4.94723419996157e-05	HyperHigh	chr1	3646564	3646712	Exon11	+	TP73	protein_coding	chr1	3646580	3646712	0.167300380228137	0.891891891891892	*	*	*	*	*	0	0	*	*	*	*	*	0	0	chr1-3646645:3646795	chr1	3646645	3646795	chr1	3646645	3646712	chr1-3646465:3646634	chr1	3646465	3646634	chr1
chr1	3646580	3647369	0.351648351648352	0.271349417417776	0.715686274509804	0.077037037037037	0.569082963200077	0.325361576366418	19	4.94723419996157e-05	HyperHigh	chr1	3646713	3647490	Intron11	+	TP73	protein_coding	chr1	3646713	3647369	0.831432192648923	0.844272844272844	*	*	*	*	*	0	0	*	*	*	*	*	0	0	chr1-3646800:3647075	chr1	3646800	3647075	chr1	3646800	3647075	chr1-3647331:3647861	chr1	3647331	3647861	chr1
chr1	3655717	3656712	0.183333333333333	-0.289164153728252	1	0.794736842105263	0	0.418134958534165	19	2.05199748763871e-06	HypoLow	chr1	3652548	3656951	LastExon	-	TP73-AS1	antisense	chr1	3655717	3656712	1	0.225982284805814	*	*	*	*	*	0	0	*	*	*	*	*	0	0	chr1-3656645:3656930	chr1	3656645	3656930	chr1	3656645	3656712	chr1-3656669:3656833	chr1	3656669	3656833	chr1
chr1	3663008	3663601	0.075892857142857	-0.233532764684356	0.980769230769231	0.866071428571428	0.137938950101211	0.382944951426972	19	0.000999251378414843	HypoLow	chr1	3662171	3663886	FirstExon	-	TP73-AS1	antisense	chr1	3663008	3663601	1	0.345772594752187	CpG: 101	chr1	3662963	3664085	chr1	3663008	3663601	*	*	*	*	*	0	0	chr1-3662425:3663755	chr1	3662425	3663755	chr1	3663008	3663601	chr1-3663599:3664123	chr1	3663599	3664123	chr1
chr1	3663622	3664355	0.227272727272727	0.254734835502873	0.238095238095238	0	0.431820614746107	0.130414521209752	22	0.000212366458693629	HyperHigh	chr1	3662171	3663886	FirstExon	-	TP73-AS1	antisense	chr1	3663622	3663886	0.360163710777626	0.153935860058309	CpG: 101	chr1	3662963	3664085	chr1	3663622	3663886	*	*	*	*	*	0	0	chr1-3663840:3664115	chr1	3663840	3664115	chr1	3663840	3663886	chr1-3663865:3664653	chr1	3663865	3664653	chr1
chr1	3663622	3664355	0.227272727272727	0.254734835502873	0.238095238095238	0	0.431820614746107	0.130414521209752	22	0.000212366458693629	HyperHigh	chr1	3663887	3664887	Promoter	-	TP73-AS1	antisense	chr1	3663887	3664355	0.638472032742155	0.468	CpG: 101	chr1	3662963	3664085	chr1	3663887	3664085	*	*	*	*	*	0	0	chr1-3663840:3664115	chr1	3663840	3664115	chr1	3663887	3664115	chr1-3663932:3664192	chr1	3663932	3664192	chr1
chr1	3710039	3710650	0.352941176470588	-0.137288419053449	0.9	0.380952380952381	0.306098611351497	0.563160755673061	14	0.0101881111132607	HyperLow	chr1	3703875	3712425	Intron1	-	LRRC47	protein_coding	chr1	3710039	3710650	1	0.0714619883040936	*	*	*	*	*	0	0	*	*	*	*	*	0	0	chr1-3710005:3710470	chr1	3710005	3710470	chr1	3710039	3710470	chr1-3710615:3711065	chr1	3710615	3711065	chr1
chr1	3759499	3760296	0.330357142857143	-0.119954077930328	0.8125	0.470588235294118	0.240642698295787	0.333333333333333	14	0.0102140620945791	HyperLow	chr1	3756341	3761470	Intron6	-	CEP104	protein_coding	chr1	3759499	3760296	1	0.155390914408267	*	*	*	*	*	0	0	*	*	*	*	*	0	0	chr1-3759600:3759750	chr1	3759600	3759750	chr1	3759600	3759750	chr1-3759813:3760118	chr1	3759813	3760118	chr1
chr1	4233327	4233934	0.164705882352941	0.322310824219241	0.34313725490196	0.0571895424836601	0.597338671619557	0.365200238229091	11	0.205870333421459	HypoHigh	*	*	*	InterGenic	*	*	*	*	*	*	*	*	*	*	*	*	*	0	0	*	*	*	*	*	0	0	chr1-4233825:4233975	chr1	4233825	4233975	chr1	4233825	4233934	chr1-4233374:4233670	chr1	4233374	4233670	chr1
chr1	4513179	4522014	0.071428571428571	-0.219346950973481	0.909090909090909	0.826086956521739	0.306098611351497	0.483969205023802	96	0.00170056014947063	HypoLow	*	*	*	InterGenic	*	*	*	*	*	*	*	*	*	*	*	*	*	0	0	*	*	*	*	*	0	0	chr1-4521725:4522235	chr1	4521725	4522235	chr1	4521725	4522014	*	*	*	*	*
chr1	4713719	4715053	0.25	0.235888822993546	0.333333333333333	0.0454545454545455	0.584478128729595	0.364971439470699	38	9.0403001788766e-07	HyperHigh	chr1	4714104	4715104	Promoter	+	AJAP1	protein_coding	chr1	4714104	4715053	0.711394302848576	0.949	CpG: 232	chr1	4713989	4716555	chr1	4714104	4715053	*	*	*	*	*	0	0	chr1-4714780:4715635	chr1	4714780	4715635	chr1	4714780	4715053	chr1-4715027:4715689	chr1	4715027	4715689	chr1
chr1	4894031	4897551	0.0909090909090911	-0.248933838829129	0.96875	0.75	0.197224259527442	0.398250897659601	25	0.0234236921134801	HypoLow	*	*	*	InterGenic	*	*	*	*	*	*	*	*	*	*	*	*	*	0	0	*	*	*	*	*	0	0	chr1-4897320:4897515	chr1	4897320	4897515	chr1	4897320	4897515	chr1-4896678:4896956	chr1	4896678	4896956	chr1
chr1	5036794	5043138	0.0791925465838505	-0.204928993085604	0.909090909090909	0.77124183006536	0.306098611351497	0.432438554997761	67	0.00719186265639486	HypoLow	*	*	*	InterGenic	*	*	*	*	*	*	*	*	*	*	*	*	*	0	0	*	*	*	*	*	0	0	chr1-5040685:5040835	chr1	5040685	5040835	chr1	5040685	5040835	*	*	*	*	*
chr1	5133856	5156375	0.1	-0.216674140549451	1	0.8	0.270426041486378	0.462091364631989	78	2.58183200743004e-05	HypoLow	chr1	5146519	5146629	LastExon	-	RP11-542C10.1	lincRNA	chr1	5146519	5146629	0.00488476397708602	1	*	*	*	*	*	0	0	*	*	*	*	*	0	0	*	*	*	*	*	0	0	chr1-5146353:5146576	chr1	5146353	5146576	chr1
chr1	5133856	5156375	0.1	-0.216674140549451	1	0.8	0.270426041486378	0.462091364631989	78	2.58183200743004e-05	HypoLow	chr1	5146630	5148310	Intron3	-	RP11-542C10.1	lincRNA	chr1	5146630	5148310	0.0746036680136773	1	*	*	*	*	*	0	0	*	*	*	*	*	0	0	*	*	*	*	*	0	0	*	*	*	*	*
chr1	5133856	5156375	0.1	-0.216674140549451	1	0.8	0.270426041486378	0.462091364631989	78	2.58183200743004e-05	HypoLow	chr1	5148311	5148433	Exon3	-	RP11-542C10.1	lincRNA	chr1	5148311	5148433	0.00541764732004085	1	*	*	*	*	*	0	0	*	*	*	*	*	0	0	*	*	*	*	*	0	0	*	*	*	*	*
chr1	5133856	5156375	0.1	-0.216674140549451	1	0.8	0.270426041486378	0.462091364631989	78	2.58183200743004e-05	HypoLow	chr1	5148434	5150639	Intron2	-	RP11-542C10.1	lincRNA	chr1	5148434	5150639	0.0979173142679515	1	*	*	*	*	*	0	0	*	*	*	*	*	0	0	*	*	*	*	*	0	0	*	*	*	*	*
chr1	5133856	5156375	0.1	-0.216674140549451	1	0.8	0.270426041486378	0.462091364631989	78	2.58183200743004e-05	HypoLow	chr1	5150640	5150687	Exon2	-	RP11-542C10.1	lincRNA	chr1	5150640	5150687	0.00208712642657312	1	*	*	*	*	*	0	0	*	*	*	*	*	0	0	*	*	*	*	*	0	0	*	*	*	*	*
chr1	5133856	5156375	0.1	-0.216674140549451	1	0.8	0.270426041486378	0.462091364631989	78	2.58183200743004e-05	HypoLow	chr1	5150688	5150792	Intron1	-	RP11-542C10.1	lincRNA	chr1	5150688	5150792	0.0046183223056086	1	*	*	*	*	*	0	0	*	*	*	*	*	0	0	*	*	*	*	*	0	0	*	*	*	*	*
chr1	5133856	5156375	0.1	-0.216674140549451	1	0.8	0.270426041486378	0.462091364631989	78	2.58183200743004e-05	HypoLow	chr1	5150793	5150959	FirstExon	-	RP11-542C10.1	lincRNA	chr1	5150793	5150959	0.00737155291087526	1	*	*	*	*	*	0	0	*	*	*	*	*	0	0	*	*	*	*	*	0	0	*	*	*	*	*
chr1	5133856	5156375	0.1	-0.216674140549451	1	0.8	0.270426041486378	0.462091364631989	78	2.58183200743004e-05	HypoLow	chr1	5150960	5151960	Promoter	-	RP11-542C10.1	lincRNA	chr1	5150960	5151960	0.0444069452462365	1	*	*	*	*	*	0	0	*	*	*	*	*	0	0	*	*	*	*	*	0	0	*	*	*	*	*
chr1	5391876	5395168	0.0754985754985755	-0.222691901715455	0.930952380952381	0.869565217391304	0.18920620363032	0.463748106165537	59	0.00143491543916663	HypoLow	*	*	*	InterGenic	*	*	*	*	*	*	*	*	*	*	*	*	*	0	0	*	*	*	*	*	0	0	chr1-5393465:5393715	chr1	5393465	5393715	chr1	5393465	5393715	chr1-5393480:5393724	chr1	5393480	5393724	chr1
chr1	5726982	5727990	0.27367717421897	0.00686831690697698	0.605263157894737	0.333333333333333	0.502661392330803	0.505263194724894	21	0.000301823048585399	HyperHigh	chr1	5647636	5728200	Intron1	-	RP11-154H17.1	lincRNA	chr1	5726982	5727990	1	0.0125117918673353	*	*	*	*	*	0	0	*	*	*	*	*	0	0	chr1-5727740:5727930	chr1	5727740	5727930	chr1	5727740	5727930	*	*	*	*	*
chr1	6032886	6036234	0.076923076923077	-0.222854814399865	1	0.904761904761905	0	0.307309364962454	52	2.48149324547124e-05	HypoLow	chr1	6029320	6038329	Intron3	-	NPHP4	protein_coding	chr1	6032886	6036234	1	0.371628371628372	*	*	*	*	*	0	0	chr1:6034742-6034859	chr1	6034742	6034859	chr1	6034742	6034859	chr1-6035605:6036335	chr1	6035605	6036335	chr1	6035605	6036234	chr1-6036137:6036517	chr1	6036137	6036517	chr1
chr1	6305865	6306450	0.132992327365729	0.216674140549451	0.166666666666667	0	0.461477168113533	0.130414521209752	18	0.00960239237134147	HypoHigh	*	*	*	InterGenic	*	*	*	*	*	*	*	*	CpG: 120	chr1	6305148	6306463	chr1	6305865	6306450	*	*	*	*	*	0	0	chr1-6305665:6307090	chr1	6305665	6307090	chr1	6305865	6306450	chr1-6306443:6307006	chr1	6306443	6307006	chr1
chr1	6372260	6374154	0.0655913978494625	-0.252755321366877	1	0.922962962962963	0	0.354191656877364	27	0.000176362239618391	HypoLow	chr1	6355041	6378551	Intron6	-	ACOT7	protein_coding	chr1	6372260	6374154	1	0.0805614632071459	*	*	*	*	*	0	0	chr1:6373523-6373899	chr1	6373523	6373899	chr1	6373523	6373899	chr1-6374000:6374195	chr1	6374000	6374195	chr1	6374000	6374154	chr1-6373937:6374221	chr1	6373937	6374221	chr1
chr1	6418509	6419230	-0.076190476190476	-0.287706856188877	0.0909090909090909	0.125	0.240642698295787	0.486382639009082	14	0.120262106611357	HypoLow	chr1	6409927	6453316	Intron1	-	ACOT7	protein_coding	chr1	6418509	6419230	1	0.0166171149369656	*	*	*	*	*	0	0	*	*	*	*	*	0	0	chr1-6418840:6419230	chr1	6418840	6419230	chr1	6418840	6419230	chr1-6419085:6419329	chr1	6419085	6419329	chr1
chr1	6477743	6478730	-0.125	0.305443570173785	0.833333333333333	1	0.517815099268087	0.216674140549451	13	0.0259868054603831	HypoHigh	chr1	6473343	6479666	Intron3	-	HES2	protein_coding	chr1	6477743	6478730	1	0.156096789498656	*	*	*	*	*	0	0	*	*	*	*	*	0	0	chr1-6478725:6479475	chr1	6478725	6479475	chr1	6478725	6478730	chr1-6478570:6481119	chr1	6478570	6481119	chr1
chr1	6504452	6505846	0.117647058823529	-0.214548798693221	0.923076923076923	0.875	0.240642698295787	0.453654682481227	30	0.0516901563686647	HypoLow	chr1	6501126	6504540	Intron5	+	ESPN	protein_coding	chr1	6504452	6504540	0.0631276901004304	0.025776215582894	*	*	*	*	*	0	0	*	*	*	*	*	0	0	*	*	*	*	*	0	0	*	*	*	*	*
chr1	6504452	6505846	0.117647058823529	-0.214548798693221	0.923076923076923	0.875	0.240642698295787	0.453654682481227	30	0.0516901563686647	HypoLow	chr1	6504541	6504742	Exon6	+	ESPN	protein_coding	chr1	6504541	6504742	0.144189383070301	1	*	*	*	*	*	0	0	*	*	*	*	*	0	0	chr1-6504665:6504855	chr1	6504665	6504855	chr1	6504665	6504742	chr1-6504679:6505103	chr1	6504679	6505103	chr1
chr1	6504452	6505846	0.117647058823529	-0.214548798693221	0.923076923076923	0.875	0.240642698295787	0.453654682481227	30	0.0516901563686647	HypoLow	chr1	6504743	6505723	Intron6	+	ESPN	protein_coding	chr1	6504743	6505723	0.703012912482066	1	*	*	*	*	*	0	0	*	*	*	*	*	0	0	chr1-6505545:6505915	chr1	6505545	6505915	chr1	6505545	6505723	chr1-6505346:6506070	chr1	6505346	6506070	chr1
chr1	6504452	6505846	0.117647058823529	-0.214548798693221	0.923076923076923	0.875	0.240642698295787	0.453654682481227	30	0.0516901563686647	HypoLow	chr1	6505724	6505995	Exon7	+	ESPN	protein_coding	chr1	6505724	6505846	0.0875179340028694	0.450184501845018	*	*	*	*	*	0	0	*	*	*	*	*	0	0	chr1-6505545:6505915	chr1	6505545	6505915	chr1	6505724	6505846	chr1-6505346:6506070	chr1	6505346	6506070	chr1
chr1	6504452	6505846	0.117647058823529	-0.214548798693221	0.923076923076923	0.875	0.240642698295787	0.453654682481227	30	0.0516901563686647	HypoLow	chr1	6503230	6505621	Intron2	-	RP1-202O8.2	antisense	chr1	6504452	6505621	0.838593974175036	0.488916771225429	*	*	*	*	*	0	0	*	*	*	*	*	0	0	chr1-6505545:6505915	chr1	6505545	6505915	chr1	6505545	6505621	chr1-6505346:6506070	chr1	6505346	6506070	chr1
chr1	6504452	6505846	0.117647058823529	-0.214548798693221	0.923076923076923	0.875	0.240642698295787	0.453654682481227	30	0.0516901563686647	HypoLow	chr1	6505622	6505741	Exon2	-	RP1-202O8.2	antisense	chr1	6505622	6505741	0.0853658536585366	1	*	*	*	*	*	0	0	*	*	*	*	*	0	0	chr1-6505545:6505915	chr1	6505545	6505915	chr1	6505622	6505741	chr1-6505346:6506070	chr1	6505346	6506070	chr1
chr1	6504452	6505846	0.117647058823529	-0.214548798693221	0.923076923076923	0.875	0.240642698295787	0.453654682481227	30	0.0516901563686647	HypoLow	chr1	6505742	6506971	Intron1	-	RP1-202O8.2	antisense	chr1	6505742	6505846	0.0746054519368723	0.0846216436126932	*	*	*	*	*	0	0	*	*	*	*	*	0	0	chr1-6505545:6505915	chr1	6505545	6505915	chr1	6505742	6505846	chr1-6505346:6506070	chr1	6505346	6506070	chr1
chr1	7469390	7470330	0.3	-0.215956597522704	0.909090909090909	0.555555555555556	0.353759374819711	0.61412366439237	12	0.00772291821808908	HyperLow	chr1	7309687	7527889	Intron5	+	CAMTA1	protein_coding	chr1	7469390	7470330	1	0.00430793484935977	*	*	*	*	*	0	0	*	*	*	*	*	0	0	chr1-7470325:7470595	chr1	7470325	7470595	chr1	7470325	7470330	*	*	*	*	*
chr1	7763826	7765645	0.228888888888889	0.261724112231989	0.394444444444444	0.0455486542443064	0.579997455340993	0.27289397858065	43	5.05174481144027e-06	HyperHigh	chr1	7737794	7792507	Intron11	+	CAMTA1	protein_coding	chr1	7763826	7765645	1	0.0332462120519803	CpG: 157	chr1	7764593	7765856	chr1	7764593	7765645	chr1:7764543-7764931	chr1	7764543	7764931	chr1	7764543	7764931	chr1-7765380:7766435	chr1	7765380	7766435	chr1	7765380	7765645	chr1-7765558:7765922	chr1	7765558	7765922	chr1
chr1	8257659	8258345	-0.292173913043478	-0.166123610870725	0.2	0.526315789473684	0.417209722462608	0.583333333333333	18	0.00716973429280321	HypoLow	*	*	*	InterGenic	*	*	*	*	*	*	*	*	*	*	*	*	*	0	0	chr1:8257762-8258040	chr1	8257762	8258040	chr1	8257762	8258040	chr1-8257800:8258355	chr1	8257800	8258355	chr1	8257800	8258345	chr1-8258157:8258263	chr1	8258157	8258263	chr1
chr1	8449392	8450276	0.114551083591331	-0.286169751345975	0.948684210526316	0.845238095238095	0.197224259527442	0.517393232355516	19	0.00396702709165724	HypoLow	chr1	8426035	8482786	Intron13	-	RERE	protein_coding	chr1	8449392	8450276	1	0.0155768180296382	*	*	*	*	*	0	0	*	*	*	*	*	0	0	chr1-8450080:8450270	chr1	8450080	8450270	chr1	8450080	8450270	chr1-8450003:8450383	chr1	8450003	8450383	chr1
chr1	9057707	9061695	0.070028011204481	-0.288618872485741	1	0.904761904761905	0.137938950101211	0.425871145606372	46	6.13647903970724e-06	HypoLow	*	*	*	InterGenic	*	*	*	*	*	*	*	*	*	*	*	*	*	0	0	*	*	*	*	*	0	0	chr1-9061300:9061450	chr1	9061300	9061450	chr1	9061300	9061450	chr1-9061593:9061957	chr1	9061593	9061957	chr1
chr1	9143775	9145074	0.115972222222222	-0.295614062710337	0.973684210526316	0.818014705882353	0	0.458289014656807	27	0.000796519906596281	HypoLow	*	*	*	InterGenic	*	*	*	*	*	*	*	*	*	*	*	*	*	0	0	*	*	*	*	*	0	0	chr1-9144865:9145330	chr1	9144865	9145330	chr1	9144865	9145074	chr1-9144568:9145208	chr1	9144568	9145208	chr1
chr1	9218581	9218872	0.536027568922306	0.252999486707792	0.65686274509804	0.131428571428572	0.614874404751526	0.412995020266199	9	0.000922886379454514	HyperHigh	*	*	*	InterGenic	*	*	*	*	*	*	*	*	*	*	*	*	*	0	0	*	*	*	*	*	0	0	chr1-9218505:9218810	chr1	9218505	9218810	chr1	9218581	9218810	*	*	*	*	*
chr1	9294259	9294581	-0.234333297747412	-0.416085863582753	0.0678733031674208	0.322413793103449	0.0905940738665995	0.623544998070512	11	0.0309554806999333	HypoLow	chr1	9293833	9294833	Promoter	+	H6PD	protein_coding	chr1	9294259	9294581	1	0.322	CpG: 79	chr1	9294401	9295118	chr1	9294401	9294581	*	*	*	*	*	0	0	chr1-9294085:9294775	chr1	9294085	9294775	chr1	9294259	9294581	chr1-9294525:9295307	chr1	9294525	9295307	chr1
chr1	9335231	9336340	0.223529411764706	-0.02340068820697	0.636363636363636	0.266666666666667	0.459594497828725	0.353759374819711	18	0.0118853180208615	HyperHigh	*	*	*	InterGenic	*	*	*	*	*	*	*	*	*	*	*	*	*	0	0	chr1:9335683-9335930	chr1	9335683	9335930	chr1	9335683	9335930	chr1-9335925:9336255	chr1	9335925	9336255	chr1	9335925	9336255	chr1-9335735:9335971	chr1	9335735	9335971	chr1
chr1	9340771	9341794	0.172794117647059	-0.210013664478727	0.9375	0.764705882352941	0.288618872485741	0.450548038384464	18	0.00121606688940499	HypoLow	*	*	*	InterGenic	*	*	*	*	*	*	*	*	*	*	*	*	*	0	0	*	*	*	*	*	0	0	chr1-9341145:9342390	chr1	9341145	9342390	chr1	9341145	9341794	chr1-9341355:9341611	chr1	9341355	9341611	chr1
chr1	9853517	9855371	0.108187134502924	-0.318260015764987	1	0.856209150326797	0.157125886949527	0.470655816047343	25	0.000825408171437568	HypoLow	chr1	9833453	9883700	Intron1	-	CLSTN1	protein_coding	chr1	9853517	9855371	1	0.0368977252373276	*	*	*	*	*	0	0	*	*	*	*	*	0	0	chr1-9854625:9855250	chr1	9854625	9855250	chr1	9854625	9855250	chr1-9853457:9853657	chr1	9853457	9853657	chr1
chr1	9909811	9911244	0.707142857142857	0.119213877794194	0.833333333333333	0.0627450980392157	0.432376130822287	0.318144667641655	29	4.64045214223867e-10	HyperHigh	chr1	9908334	9910834	LastExon	-	CTNNBIP1	protein_coding	chr1	9909811	9910834	0.713886950453594	0.4092	*	*	*	*	*	0	0	*	*	*	*	*	0	0	chr1-9910525:9911215	chr1	9910525	9911215	chr1	9910525	9910834	chr1-9910632:9911356	chr1	9910632	9911356	chr1
chr1	9909811	9911244	0.707142857142857	0.119213877794194	0.833333333333333	0.0627450980392157	0.432376130822287	0.318144667641655	29	4.64045214223867e-10	HyperHigh	chr1	9910835	9931244	Intron5	-	CTNNBIP1	protein_coding	chr1	9910835	9911244	0.285415212840195	0.0200401783526875	*	*	*	*	*	0	0	*	*	*	*	*	0	0	chr1-9910525:9911215	chr1	9910525	9911215	chr1	9910835	9911215	chr1-9910632:9911356	chr1	9910632	9911356	chr1
chr1	9909811	9911244	0.707142857142857	0.119213877794194	0.833333333333333	0.0627450980392157	0.432376130822287	0.318144667641655	29	4.64045214223867e-10	HyperHigh	chr1	9909533	9910043	Intron2	+	RP11-84A14.5	antisense	chr1	9909811	9910043	0.161898115840893	0.454901960784314	*	*	*	*	*	0	0	*	*	*	*	*	0	0	chr1-9909705:9910475	chr1	9909705	9910475	chr1	9909811	9910043	chr1-9909938:9910502	chr1	9909938	9910502	chr1
chr1	9909811	9911244	0.707142857142857	0.119213877794194	0.833333333333333	0.0627450980392157	0.432376130822287	0.318144667641655	29	4.64045214223867e-10	HyperHigh	chr1	9910044	9910212	LastExon	+	RP11-84A14.5	antisense	chr1	9910044	9910212	0.117236566643405	1	*	*	*	*	*	0	0	*	*	*	*	*	0	0	chr1-9909705:9910475	chr1	9909705	9910475	chr1	9910044	9910212	chr1-9910189:9910569	chr1	9910189	9910569	chr1
chr1	10855327	10856232	0.0952380952380952	0.260154549023825	0.0952380952380952	0	0.45698353148489	0.0954656523719854	30	0.000385362847780429	HypoHigh	chr1	10820915	10856620	Intron1	-	CASZ1	protein_coding	chr1	10855327	10856232	1	0.0253465901134295	CpG: 247	chr1	10853894	10856964	chr1	10855327	10856232	*	*	*	*	*	0	0	chr1-10855500:10856235	chr1	10855500	10856235	chr1	10855500	10856232	chr1-10856160:10856989	chr1	10856160	10856989	chr1
chr1	10936082	10942940	0.0825757575757575	-0.233926588215022	0.95	0.884615384615385	0.167752778258549	0.402506249879807	105	2.62086464574037e-08	HypoLow	*	*	*	InterGenic	*	*	*	*	*	*	*	*	*	*	*	*	*	0	0	*	*	*	*	*	0	0	chr1-10940220:10940370	chr1	10940220	10940370	chr1	10940220	10940370	chr1-10942275:10942691	chr1	10942275	10942691	chr1
chr1	10976671	10977552	-0.214285714285714	-0.156812599316163	0.416666666666667	0.666666666666667	0.459594497828725	0.561938569717677	16	0.0326115216731803	HypoLow	*	*	*	InterGenic	*	*	*	*	*	*	*	*	*	*	*	*	*	0	0	*	*	*	*	*	0	0	chr1-10977540:10977690	chr1	10977540	10977690	chr1	10977540	10977552	chr1-10977501:10977951	chr1	10977501	10977951	chr1
chr1	11026616	11027129	0.209090909090909	-0.27423213451626	0.909090909090909	0.6	0.240642698295787	0.518885569154274	14	0.0155651450057383	HyperLow	*	*	*	InterGenic	*	*	*	*	*	*	*	*	*	*	*	*	*	0	0	*	*	*	*	*	0	0	chr1-11026685:11026890	chr1	11026685	11026890	chr1	11026685	11026890	chr1-11027049:11027719	chr1	11027049	11027719	chr1
chr1	11475606	11479394	0.0879227053140095	-0.211360667579954	1	0.882352941176471	0.174470462995874	0.333333333333333	37	0.00010693358936863	HypoLow	*	*	*	InterGenic	*	*	*	*	*	*	*	*	*	*	*	*	*	0	0	*	*	*	*	*	0	0	chr1-11478545:11478835	chr1	11478545	11478835	chr1	11478545	11478835	chr1-11477253:11477537	chr1	11477253	11477537	chr1
chr1	11750133	11750893	0.333333333333333	0.214152942904075	0.384615384615385	0.0476190476190476	0.486382639009082	0.240642698295787	20	0.00068966911675976	HyperHigh	chr1	11742074	11751469	Intron1	-	MAD2L2	protein_coding	chr1	11750133	11750893	1	0.0808940926024481	CpG: 169	chr1	11750701	11752651	chr1	11750701	11750893	*	*	*	*	*	0	0	chr1-11750445:11752175	chr1	11750445	11752175	chr1	11750445	11750893	chr1-11750859:11751349	chr1	11750859	11751349	chr1
chr1	11750133	11750893	0.333333333333333	0.214152942904075	0.384615384615385	0.0476190476190476	0.486382639009082	0.240642698295787	20	0.00068966911675976	HyperHigh	chr1	11750785	11751785	Promoter	+	DRAXIN	protein_coding	chr1	11750785	11750893	0.142105263157895	0.108	CpG: 169	chr1	11750701	11752651	chr1	11750785	11750893	*	*	*	*	*	0	0	chr1-11750445:11752175	chr1	11750445	11752175	chr1	11750785	11750893	chr1-11750859:11751349	chr1	11750859	11751349	chr1
chr1	11857233	11858822	0.166666666666667	-0.370216656809409	1	0.769230769230769	0	0.432931646898466	14	0.000577063387639193	HypoLow	chr1	11856457	11860268	Intron4	-	MTHFR	protein_coding	chr1	11857233	11858822	1	0.416950931514038	*	*	*	*	*	0	0	*	*	*	*	*	0	0	chr1-11858540:11858730	chr1	11858540	11858730	chr1	11858540	11858730	chr1-11858760:11859064	chr1	11858760	11859064	chr1
chr1	12043253	12044946	0.1	-0.216150781368583	0.946778711484593	0.800889877641825	0.319715972342415	0.503190714957711	21	0.0187215952012059	HypoLow	chr1	12042172	12049221	Intron2	+	MFN2	protein_coding	chr1	12043253	12044946	1	0.240175911476805	*	*	*	*	*	0	0	*	*	*	*	*	0	0	chr1-12044625:12044815	chr1	12044625	12044815	chr1	12044625	12044815	chr1-12044675:12045085	chr1	12044675	12045085	chr1
chr1	12231808	12236041	0.05	-0.205992182590375	0.9	0.814814814814815	0.240642698295787	0.417209722462608	54	0.0258099615261829	HypoLow	chr1	12227227	12248852	Intron1	+	TNFRSF1B	protein_coding	chr1	12231808	12236041	1	0.195745664739884	*	*	*	*	*	0	0	chr1:12235070-12235463	chr1	12235070	12235463	chr1	12235070	12235463	chr1-12235605:12235850	chr1	12235605	12235850	chr1	12235605	12235850	chr1-12235815:12236215	chr1	12235815	12236215	chr1
chr1	12806324	12808593	0.208333333333333	-0.15395603072156	0.833333333333333	0.55	0.429018009372909	0.449529298670807	16	0.0336582865656017	HyperLow	chr1	12806163	12806489	FirstExon	+	C1orf158	protein_coding	chr1	12806324	12806489	0.0727192595857206	0.506134969325153	*	*	*	*	*	0	0	*	*	*	*	*	0	0	*	*	*	*	*	0	0	chr1-12805918:12806694	chr1	12805918	12806694	chr1
chr1	12806324	12808593	0.208333333333333	-0.15395603072156	0.833333333333333	0.55	0.429018009372909	0.449529298670807	16	0.0336582865656017	HyperLow	chr1	12806490	12815649	Intron1	+	C1orf158	protein_coding	chr1	12806490	12808593	0.926840017628911	0.229610219456273	*	*	*	*	*	0	0	*	*	*	*	*	0	0	*	*	*	*	*	0	0	chr1-12808572:12809032	chr1	12808572	12809032	chr1
chr1	13909862	13911048	0.269230769230769	0.318472862778152	0.384615384615385	0.0588235294117647	0.596643025103333	0.285665239284678	34	2.30445400826875e-05	HyperHigh	chr1	13908959	13909959	Promoter	+	PDPN	protein_coding	chr1	13909862	13909959	0.081787521079258	0.097	*	*	*	*	*	0	0	*	*	*	*	*	0	0	chr1-13909280:13909955	chr1	13909280	13909955	chr1	13909862	13909955	chr1-13909830:13911312	chr1	13909830	13911312	chr1
chr1	13909862	13911048	0.269230769230769	0.318472862778152	0.384615384615385	0.0588235294117647	0.596643025103333	0.285665239284678	34	2.30445400826875e-05	HyperHigh	chr1	13909960	13910595	FirstExon	+	PDPN	protein_coding	chr1	13909960	13910595	0.535413153456998	1	CpG: 59	chr1	13910137	13910868	chr1	13910137	13910595	*	*	*	*	*	0	0	chr1-13910065:13911355	chr1	13910065	13911355	chr1	13910065	13910595	chr1-13910543:13910787	chr1	13910543	13910787	chr1
chr1	13909862	13911048	0.269230769230769	0.318472862778152	0.384615384615385	0.0588235294117647	0.596643025103333	0.285665239284678	34	2.30445400826875e-05	HyperHigh	chr1	13910596	13933667	Intron1	+	PDPN	protein_coding	chr1	13910596	13911048	0.381112984822934	0.0195916952017685	CpG: 59	chr1	13910137	13910868	chr1	13910596	13910868	*	*	*	*	*	0	0	chr1-13910065:13911355	chr1	13910065	13911355	chr1	13910596	13911048	chr1-13911011:13911343	chr1	13911011	13911343	chr1
chr1	15111178	15111971	0.336400441663599	-0.210470896122317	0.904545454545455	0.567251461988304	0.206949200038446	0.428968085484082	13	0.00160608359546534	HyperLow	chr1	14925720	15287179	Intron1	+	KAZN	protein_coding	chr1	15111178	15111971	1	0.00219388644355238	*	*	*	*	*	0	0	chr1:15111272-15111486	chr1	15111272	15111486	chr1	15111272	15111486	chr1-15111725:15111970	chr1	15111725	15111970	chr1	15111725	15111970	chr1-15111965:15112181	chr1	15111965	15112181	chr1
chr1	15152783	15153192	0.623737373737374	0.239458138037123	0.683333333333333	0.0753968253968254	0.507351736291401	0.302346738582945	9	0.00718951725016505	HyperHigh	chr1	14925720	15287179	Intron1	+	KAZN	protein_coding	chr1	15152783	15153192	1	0.00113152529055854	*	*	*	*	*	0	0	*	*	*	*	*	0	0	chr1-15152685:15153055	chr1	15152685	15153055	chr1	15152783	15153055	chr1-15152795:15153051	chr1	15152795	15153051	chr1
chr1	15243436	15245541	-0.094298245614035	0.259131330056045	0.823529411764706	0.948684210526316	0.431820614746107	0.182488518892995	27	0.00468746214072228	HypoHigh	chr1	14925720	15287179	Intron1	+	KAZN	protein_coding	chr1	15243436	15245541	1	0.005823620382948	*	*	*	*	*	0	0	*	*	*	*	*	0	0	chr1-15243525:15243775	chr1	15243525	15243775	chr1	15243525	15243775	chr1-15244174:15244504	chr1	15244174	15244504	chr1
chr1	15445196	15446860	0.125293179472745	-0.20918228935157	0.894444444444444	0.677083333333333	0.306703988156976	0.55765442469414	17	0.0224856493948444	HypoLow	chr1	15444823	15445400	Exon5	-	TMEM51-AS1	processed_transcript	chr1	15445196	15445400	0.122596153846154	0.353552859618718	*	*	*	*	*	0	0	*	*	*	*	*	0	0	chr1-15445200:15445350	chr1	15445200	15445350	chr1	15445200	15445350	*	*	*	*	*
chr1	15445196	15446860	0.125293179472745	-0.20918228935157	0.894444444444444	0.677083333333333	0.306703988156976	0.55765442469414	17	0.0224856493948444	HypoLow	chr1	15445401	15447072	Intron4	-	TMEM51-AS1	processed_transcript	chr1	15445401	15446860	0.876802884615385	0.873129862357869	*	*	*	*	*	0	0	*	*	*	*	*	0	0	chr1-15446125:15446655	chr1	15446125	15446655	chr1	15446125	15446655	*	*	*	*	*
chr1	15461954	15462488	0.270833333333333	0.017794444123931	0.615384615384615	0.1875	0.333333333333333	0.289464243003454	12	0.0487803246957424	HyperHigh	chr1	15450870	15478786	Intron1	-	TMEM51-AS1	processed_transcript	chr1	15461954	15462488	1	0.019128815016478	*	*	*	*	*	0	0	*	*	*	*	*	0	0	*	*	*	*	*	0	0	*	*	*	*	*
chr1	15673793	15674132	0.439102564102565	-0.151016941194391	0.719457013574661	0.204805491990847	0.4053714531523	0.460571974135874	7	0.0303479417395604	HyperLow	chr1	15672020	15675537	Intron16	+	FHAD1	protein_coding	chr1	15673793	15674132	1	0.096388967870344	*	*	*	*	*	0	0	*	*	*	*	*	0	0	chr1-15673780:15673990	chr1	15673780	15673990	chr1	15673793	15673990	chr1-15673801:15673947	chr1	15673801	15673947	chr1
chr1	15710911	15711442	0.365384615384615	-0.201210753610957	0.888888888888889	0.478260869565217	0.306098611351497	0.597493750120193	16	0.000669048028402885	HyperLow	chr1	15708690	15723792	Intron29	+	FHAD1	protein_coding	chr1	15710911	15711442	1	0.0351609058402861	*	*	*	*	*	0	0	*	*	*	*	*	0	0	chr1-15711365:15711615	chr1	15711365	15711615	chr1	15711365	15711442	chr1-15711008:15711712	chr1	15711008	15711712	chr1
chr1	15858262	15859481	0.405128205128205	-0.166123610870725	0.833333333333333	0.363636363636364	0.287706856188877	0.516264980231799	10	0.00123406005758947	HyperLow	chr1	15855768	15860731	Intron2	+	DNAJC16	protein_coding	chr1	15858262	15859481	1	0.245617570018134	*	*	*	*	*	0	0	*	*	*	*	*	0	0	chr1-15858805:15859035	chr1	15858805	15859035	chr1	15858805	15859035	chr1-15858553:15858829	chr1	15858553	15858829	chr1
chr1	15929419	15929663	0.347619047619048	0.080330317807236	0.858333333333334	0.475	0.420071006914396	0.425985515862637	7	0.0300577569306801	HyperHigh	chr1	15914938	15929583	Intron1	-	RP4-680D5.2	antisense	chr1	15929419	15929583	0.672131147540984	0.0111983612154319	*	*	*	*	*	0	0	*	*	*	*	*	0	0	chr1-15929540:15930255	chr1	15929540	15930255	chr1	15929540	15929583	chr1-15929566:15930506	chr1	15929566	15930506	chr1
chr1	15929419	15929663	0.347619047619048	0.080330317807236	0.858333333333334	0.475	0.420071006914396	0.425985515862637	7	0.0300577569306801	HyperHigh	chr1	15929584	15930121	FirstExon	-	RP4-680D5.2	antisense	chr1	15929584	15929663	0.323770491803279	0.147113594040968	*	*	*	*	*	0	0	*	*	*	*	*	0	0	chr1-15929540:15930255	chr1	15929540	15930255	chr1	15929584	15929663	chr1-15929643:15930322	chr1	15929643	15930322	chr1
chr1	16070933	16073100	0.033899923605806	-0.221572333820827	0.941176470588235	0.912878787878788	0.142218972870857	0.412670602132302	35	0.0864230836715652	HypoLow	chr1	16066718	16075924	Intron1	-	RP11-169K16.4	antisense	chr1	16070933	16073100	1	0.235389963067565	*	*	*	*	*	0	0	*	*	*	*	*	0	0	chr1-16073005:16073310	chr1	16073005	16073310	chr1	16073005	16073100	chr1-16071645:16071828	chr1	16071645	16071828	chr1
chr1	16070933	16073100	0.033899923605806	-0.221572333820827	0.941176470588235	0.912878787878788	0.142218972870857	0.412670602132302	35	0.0864230836715652	HypoLow	chr1	16070655	16071075	Exon4	+	TMEM82	protein_coding	chr1	16070933	16071075	0.0655283802491924	0.338095238095238	*	*	*	*	*	0	0	*	*	*	*	*	0	0	chr1-16070685:16071090	chr1	16070685	16071090	chr1	16070933	16071075	chr1-16070673:16070997	chr1	16070673	16070997	chr1
chr1	16070933	16073100	0.033899923605806	-0.221572333820827	0.941176470588235	0.912878787878788	0.142218972870857	0.412670602132302	35	0.0864230836715652	HypoLow	chr1	16071076	16073361	Intron4	+	TMEM82	protein_coding	chr1	16071076	16073100	0.934010152284264	0.885776805251641	*	*	*	*	*	0	0	*	*	*	*	*	0	0	chr1-16073005:16073310	chr1	16073005	16073310	chr1	16073005	16073100	chr1-16071645:16071828	chr1	16071645	16071828	chr1
chr1	16176776	16180180	0.0595238095238095	-0.220409966376456	1	0.884444444444444	0.18920620363032	0.417209722462608	29	0.0317932663662316	HypoLow	chr1	16174646	16199310	Intron1	+	SPEN	protein_coding	chr1	16176776	16180180	1	0.138014920531949	*	*	*	*	*	0	0	chr1:16176617-16176801	chr1	16176617	16176801	chr1	16176776	16176801	chr1-16179060:16179230	chr1	16179060	16179230	chr1	16179060	16179230	chr1-16180030:16180334	chr1	16180030	16180334	chr1
chr1	16284217	16295965	0.0465367965367965	-0.216283242175115	1	0.914855072463769	0	0.307309364962454	101	7.8007461738749e-07	HypoLow	chr1	16274993	16299533	Intron2	-	ZBTB17	protein_coding	chr1	16284217	16295965	1	0.478728606356968	*	*	*	*	*	0	0	chr1:16292565-16293101	chr1	16292565	16293101	chr1	16292565	16293101	chr1-16294365:16294515	chr1	16294365	16294515	chr1	16294365	16294515	chr1-16295221:16295491	chr1	16295221	16295491	chr1
chr1	16386844	16391488	0.075	-0.201210753610957	0.916666666666667	0.8	0.240642698295787	0.459594497828725	56	0.00168219443127879	HypoLow	chr1	16386547	16388593	Intron4	-	FAM131C	protein_coding	chr1	16386844	16388593	0.376614987080103	0.854838709677419	*	*	*	*	*	0	0	*	*	*	*	*	0	0	chr1-16387825:16388255	chr1	16387825	16388255	chr1	16387825	16388255	chr1-16387203:16387583	chr1	16387203	16387583	chr1
chr1	16386844	16391488	0.075	-0.201210753610957	0.916666666666667	0.8	0.240642698295787	0.459594497828725	56	0.00168219443127879	HypoLow	chr1	16388594	16388687	Exon4	-	FAM131C	protein_coding	chr1	16388594	16388687	0.0200258397932817	1	*	*	*	*	*	0	0	*	*	*	*	*	0	0	chr1-16388685:16388835	chr1	16388685	16388835	chr1	16388685	16388687	*	*	*	*	*
chr1	16386844	16391488	0.075	-0.201210753610957	0.916666666666667	0.8	0.240642698295787	0.459594497828725	56	0.00168219443127879	HypoLow	chr1	16388688	16388993	Intron3	-	FAM131C	protein_coding	chr1	16388688	16388993	0.0656761412575366	1	*	*	*	*	*	0	0	*	*	*	*	*	0	0	chr1-16388845:16388995	chr1	16388845	16388995	chr1	16388845	16388993	*	*	*	*	*
chr1	16386844	16391488	0.075	-0.201210753610957	0.916666666666667	0.8	0.240642698295787	0.459594497828725	56	0.00168219443127879	HypoLow	chr1	16388994	16389029	Exon3	-	FAM131C	protein_coding	chr1	16388994	16389029	0.00753660637381568	1	*	*	*	*	*	0	0	*	*	*	*	*	0	0	chr1-16388845:16388995	chr1	16388845	16388995	chr1	16388994	16388995	*	*	*	*	*
chr1	16386844	16391488	0.075	-0.201210753610957	0.916666666666667	0.8	0.240642698295787	0.459594497828725	56	0.00168219443127879	HypoLow	chr1	16389030	16390015	Intron2	-	FAM131C	protein_coding	chr1	16389030	16390015	0.212101636520241	1	*	*	*	*	*	0	0	*	*	*	*	*	0	0	chr1-16389725:16389975	chr1	16389725	16389975	chr1	16389725	16389975	*	*	*	*	*
chr1	16386844	16391488	0.075	-0.201210753610957	0.916666666666667	0.8	0.240642698295787	0.459594497828725	56	0.00168219443127879	HypoLow	chr1	16390016	16390131	Exon2	-	FAM131C	protein_coding	chr1	16390016	16390131	0.0247631352282515	1	*	*	*	*	*	0	0	*	*	*	*	*	0	0	*	*	*	*	*	0	0	*	*	*	*	*
chr1	16386844	16391488	0.075	-0.201210753610957	0.916666666666667	0.8	0.240642698295787	0.459594497828725	56	0.00168219443127879	HypoLow	chr1	16390132	16399915	Intron1	-	FAM131C	protein_coding	chr1	16390132	16391488	0.291989664082687	0.138607789021772	*	*	*	*	*	0	0	*	*	*	*	*	0	0	chr1-16391425:16391655	chr1	16391425	16391655	chr1	16391425	16391488	chr1-16391227:16391851	chr1	16391227	16391851	chr1
chr1	16456885	16458292	0.129807692307692	-0.206522752880162	1	0.833333333333333	0.181188147733199	0.493836729578753	26	0.000273007840890271	HypoLow	chr1	16456721	16456914	Exon15	-	EPHA2	protein_coding	chr1	16456885	16456914	0.0206112295664534	0.150259067357513	*	*	*	*	*	0	0	*	*	*	*	*	0	0	*	*	*	*	*	0	0	chr1-16456680:16457027	chr1	16456680	16457027	chr1
chr1	16456885	16458292	0.129807692307692	-0.206522752880162	1	0.833333333333333	0.181188147733199	0.493836729578753	26	0.000273007840890271	HypoLow	chr1	16456915	16458215	Intron14	-	EPHA2	protein_coding	chr1	16456915	16458215	0.923951670220327	1	*	*	*	*	*	0	0	*	*	*	*	*	0	0	chr1-16458200:16458595	chr1	16458200	16458595	chr1	16458200	16458215	chr1-16458145:16458975	chr1	16458145	16458975	chr1
chr1	16456885	16458292	0.129807692307692	-0.206522752880162	1	0.833333333333333	0.181188147733199	0.493836729578753	26	0.000273007840890271	HypoLow	chr1	16458216	16458365	Exon14	-	EPHA2	protein_coding	chr1	16458216	16458292	0.0540156361051883	0.51006711409396	*	*	*	*	*	0	0	*	*	*	*	*	0	0	chr1-16458200:16458595	chr1	16458200	16458595	chr1	16458216	16458292	chr1-16458215:16458645	chr1	16458215	16458645	chr1
chr1	16554850	16555078	-0.29004329004329	-0.235517895975539	0.230769230769231	0.5	0.365265085000311	0.615072601772367	8	0.00407925407925408	HypoLow	*	*	*	InterGenic	*	*	*	*	*	*	*	*	*	*	*	*	*	0	0	*	*	*	*	*	0	0	chr1-16554205:16555155	chr1	16554205	16555155	chr1	16554850	16555078	chr1-16555057:16555577	chr1	16555057	16555577	chr1
chr1	16605167	16606621	0.276351727982163	-0.167412889313337	0.870833333333334	0.511904761904762	0.432557506643443	0.507309364962454	17	0.0069399871374288	HyperLow	chr1	16583255	16621277	Intron4	-	FBXO42	protein_coding	chr1	16605167	16606621	1	0.0382410183577929	*	*	*	*	*	0	0	*	*	*	*	*	0	0	chr1-16605780:16606150	chr1	16605780	16606150	chr1	16605780	16606150	chr1-16605726:16606106	chr1	16605726	16606106	chr1
chr1	16747834	16748221	-0.230769230769231	0.228231076336485	0.5	0.875	0.657249085709394	0.307309364962454	8	0.0262237762237762	HypoHigh	chr1	16737411	16748405	Intron5	-	SPATA21	protein_coding	chr1	16747834	16748221	1	0.0352010187374932	*	*	*	*	*	0	0	*	*	*	*	*	0	0	chr1-16748125:16748275	chr1	16748125	16748275	chr1	16748125	16748221	chr1-16748139:16748389	chr1	16748139	16748389	chr1
chr1	16843112	16850599	0.105263157894737	-0.2123432909292	0.916666666666667	0.818181818181818	0.306098611351497	0.523650198151556	92	9.42849183844032e-05	HypoLow	chr1	16846188	16847188	Promoter	+	RP4-798A10.4	lincRNA	chr1	16846188	16847188	0.133564845732603	1	*	*	*	*	*	0	0	*	*	*	*	*	0	0	chr1-16846900:16847555	chr1	16846900	16847555	chr1	16846900	16847188	chr1-16847134:16847914	chr1	16847134	16847914	chr1
chr1	16843112	16850599	0.105263157894737	-0.2123432909292	0.916666666666667	0.818181818181818	0.306098611351497	0.523650198151556	92	9.42849183844032e-05	HypoLow	chr1	16847189	16847282	FirstExon	+	RP4-798A10.4	lincRNA	chr1	16847189	16847282	0.0124215306531321	1	CpG: 42	chr1	16847280	16847892	chr1	16847280	16847282	*	*	*	*	*	0	0	chr1-16846900:16847555	chr1	16846900	16847555	chr1	16847189	16847282	chr1-16847134:16847914	chr1	16847134	16847914	chr1
chr1	16843112	16850599	0.105263157894737	-0.2123432909292	0.916666666666667	0.818181818181818	0.306098611351497	0.523650198151556	92	9.42849183844032e-05	HypoLow	chr1	16847283	16848058	Intron1	+	RP4-798A10.4	lincRNA	chr1	16847283	16848058	0.103512755442767	1	CpG: 42	chr1	16847280	16847892	chr1	16847283	16847892	*	*	*	*	*	0	0	chr1-16847765:16847935	chr1	16847765	16847935	chr1	16847765	16847935	chr1-16847383:16847793	chr1	16847383	16847793	chr1
chr1	16843112	16850599	0.105263157894737	-0.2123432909292	0.916666666666667	0.818181818181818	0.306098611351497	0.523650198151556	92	9.42849183844032e-05	HypoLow	chr1	16848059	16848291	LastExon	+	RP4-798A10.4	lincRNA	chr1	16848059	16848291	0.0309870442099639	1	*	*	*	*	*	0	0	*	*	*	*	*	0	0	chr1-16848125:16848395	chr1	16848125	16848395	chr1	16848125	16848291	chr1-16848270:16848670	chr1	16848270	16848670	chr1
chr1	16973883	16975111	0.167152031063321	-0.229036569644375	0.845490716180372	0.642025089605735	0.496387399797197	0.74068468048422	47	1.94174498401822e-07	HypoLow	*	*	*	InterGenic	*	*	*	*	*	*	*	*	CpG: 133	chr1	16973485	16975045	chr1	16973883	16975045	*	*	*	*	*	0	0	chr1-16974225:16974655	chr1	16974225	16974655	chr1	16974225	16974655	chr1-16974395:16974795	chr1	16974395	16974795	chr1
chr1	17215373	17215766	0.140032679738562	0.243454193850215	0.214052287581699	0.0606617647058823	0.532747386253376	0.177427506616428	17	0.0114810158110255	HypoHigh	chr1	17215281	17215710	Intron1	-	RP11-108M9.4	lincRNA	chr1	17215373	17215710	0.857506361323155	0.785547785547786	CpG: 51	chr1	17215421	17216094	chr1	17215421	17215710	*	*	*	*	*	0	0	chr1-17215680:17216415	chr1	17215680	17216415	chr1	17215680	17215710	chr1-17215678:17216226	chr1	17215678	17216226	chr1
chr1	17215373	17215766	0.140032679738562	0.243454193850215	0.214052287581699	0.0606617647058823	0.532747386253376	0.177427506616428	17	0.0114810158110255	HypoHigh	chr1	17215711	17215868	FirstExon	-	RP11-108M9.4	lincRNA	chr1	17215711	17215766	0.139949109414758	0.35031847133758	CpG: 51	chr1	17215421	17216094	chr1	17215711	17215766	*	*	*	*	*	0	0	chr1-17215680:17216415	chr1	17215680	17216415	chr1	17215711	17215766	chr1-17215740:17216136	chr1	17215740	17216136	chr1
chr1	17939587	17940910	0.102631578947368	-0.285913811576367	0.928205128205128	0.825	0.288618872485741	0.560546201285763	23	0.0241166490797813	HypoLow	chr1	17939553	17939669	Exon8	+	ARHGEF10L	protein_coding	chr1	17939587	17939669	0.0619803476946334	0.706896551724138	*	*	*	*	*	0	0	*	*	*	*	*	0	0	chr1-17939445:17939815	chr1	17939445	17939815	chr1	17939587	17939669	chr1-17939246:17939995	chr1	17939246	17939995	chr1
chr1	17939587	17940910	0.102631578947368	-0.285913811576367	0.928205128205128	0.825	0.288618872485741	0.560546201285763	23	0.0241166490797813	HypoLow	chr1	17939670	17942588	Intron8	+	ARHGEF10L	protein_coding	chr1	17939670	17940910	0.937263794406652	0.424948594928033	*	*	*	*	*	0	0	*	*	*	*	*	0	0	chr1-17940705:17940895	chr1	17940705	17940895	chr1	17940705	17940895	chr1-17939246:17939995	chr1	17939246	17939995	chr1
chr1	18291398	18298629	0.0909090909090911	-0.246003935465634	0.9	0.777777777777778	0.270426041486378	0.5	44	0.00167272243742165	HypoLow	*	*	*	InterGenic	*	*	*	*	*	*	*	*	*	*	*	*	*	0	0	*	*	*	*	*	0	0	chr1-18297865:18298015	chr1	18297865	18298015	chr1	18297865	18298015	chr1-18297285:18297589	chr1	18297285	18297589	chr1
chr1	18436722	18437830	0.0710784313725487	0.239465534930954	0.157894736842105	0	0.473983505511905	0.134176735655481	35	3.32229802746647e-05	HypoHigh	chr1	18434693	18554391	Intron1	+	IGSF21	protein_coding	chr1	18436722	18437830	1	0.009256629183445	CpG: 90	chr1	18436551	18437673	chr1	18436722	18437673	*	*	*	*	*	0	0	chr1-18436365:18437875	chr1	18436365	18437875	chr1	18436722	18437830	chr1-18437272:18437693	chr1	18437272	18437693	chr1
chr1	18444935	18447815	0.160714285714286	-0.2534983432554	0.888888888888889	0.5625	0.306098611351497	0.573976031629121	24	0.0124008169831154	HypoLow	chr1	18434693	18554391	Intron1	+	IGSF21	protein_coding	chr1	18444935	18447815	1	0.024060552390182	*	*	*	*	*	0	0	*	*	*	*	*	0	0	chr1-18447525:18447755	chr1	18447525	18447755	chr1	18447525	18447755	chr1-18447194:18447447	chr1	18447194	18447447	chr1
chr1	19126752	19127723	-0.25	0.207385217919757	0.476190476190476	0.823529411764706	0.622544630323737	0.365265085000311	12	0.0323415436610747	HypoHigh	*	*	*	InterGenic	*	*	*	*	*	*	*	*	*	*	*	*	*	0	0	*	*	*	*	*	0	0	chr1-19127205:19127355	chr1	19127205	19127355	chr1	19127205	19127355	chr1-19127672:19128008	chr1	19127672	19128008	chr1
chr1	19145781	19149176	0.0869408369408371	-0.251241718682486	0.875	0.721111111111111	0.306098611351497	0.567209874875979	77	0.00243606907168052	HypoLow	*	*	*	InterGenic	*	*	*	*	*	*	*	*	*	*	*	*	*	0	0	*	*	*	*	*	0	0	chr1-19147825:19148135	chr1	19147825	19148135	chr1	19147825	19148135	chr1-19147333:19147593	chr1	19147333	19147593	chr1
chr1	19194241	19196120	0.15	-0.216674140549451	0.9	0.666666666666667	0.323650198151556	0.576524652837874	26	0.00247317112995779	HypoLow	chr1	19186194	19200956	Intron22	-	RP13-279N23.2	protein_coding	chr1	19194241	19196120	1	0.127286275572416	*	*	*	*	*	0	0	*	*	*	*	*	0	0	chr1-19196045:19196195	chr1	19196045	19196195	chr1	19196045	19196120	chr1-19195578:19195904	chr1	19195578	19195904	chr1
chr1	19265304	19272993	0.0952380952380955	-0.25920086618645	0.952380952380952	0.866666666666667	0.181188147733199	0.384269083954659	93	1.53947812363551e-14	HypoLow	chr1	19247616	19282161	Intron1	-	IFFO2	protein_coding	chr1	19265304	19272993	1	0.222579244463743	*	*	*	*	*	0	0	chr1:19271920-19272097	chr1	19271920	19272097	chr1	19271920	19272097	chr1-19272420:19272710	chr1	19272420	19272710	chr1	19272420	19272710	chr1-19272613:19273229	chr1	19272613	19273229	chr1
chr1	19600363	19600873	0.3	-0.041071995034693	0.8	0.5	0.554832593066821	0.625043682878803	20	4.45955706748609e-05	HyperHigh	chr1	19600355	19600688	FirstExon	-	AKR7L	polymorphic_pseudogene	chr1	19600363	19600688	0.637254901960784	0.975975975975976	CpG: 72	chr1	19600249	19600942	chr1	19600363	19600688	*	*	*	*	*	0	0	chr1-19600445:19601095	chr1	19600445	19601095	chr1	19600445	19600688	chr1-19600614:19601150	chr1	19600614	19601150	chr1
chr1	19600363	19600873	0.3	-0.041071995034693	0.8	0.5	0.554832593066821	0.625043682878803	20	4.45955706748609e-05	HyperHigh	chr1	19600689	19601689	Promoter	-	AKR7L	polymorphic_pseudogene	chr1	19600689	19600873	0.36078431372549	0.184	CpG: 72	chr1	19600249	19600942	chr1	19600689	19600873	*	*	*	*	*	0	0	chr1-19600445:19601095	chr1	19600445	19601095	chr1	19600689	19600873	chr1-19600614:19601150	chr1	19600614	19601150	chr1
chr1	19615052	19615941	0.200649350649351	-0.270401356163391	1	0.791666666666667	0.146498995640504	0.425070684680537	23	5.04160411913682e-07	HyperLow	chr1	19614990	19615744	FirstExon	-	AKR7A3	protein_coding	chr1	19615052	19615744	0.778402699662542	0.917771883289125	CpG: 73	chr1	19614998	19615660	chr1	19615052	19615660	*	*	*	*	*	0	0	chr1-19615465:19615715	chr1	19615465	19615715	chr1	19615465	19615715	chr1-19615722:19616166	chr1	19615722	19616166	chr1
chr1	19615052	19615941	0.200649350649351	-0.270401356163391	1	0.791666666666667	0.146498995640504	0.425070684680537	23	5.04160411913682e-07	HyperLow	chr1	19615745	19616745	Promoter	-	AKR7A3	protein_coding	chr1	19615745	19615941	0.220472440944882	0.196	*	*	*	*	*	0	0	*	*	*	*	*	0	0	*	*	*	*	*	0	0	chr1-19615801:19616134	chr1	19615801	19616134	chr1
chr1	19696930	19697545	0.384615384615385	-0.136956519908456	0.928571428571429	0.555555555555556	0.216674140549451	0.45698353148489	12	0.000174370153642944	HyperLow	chr1	19684058	19705033	Intron5	-	CAPZB	protein_coding	chr1	19696930	19697545	1	0.0293206197854589	*	*	*	*	*	0	0	*	*	*	*	*	0	0	chr1-19697400:19697530	chr1	19697400	19697530	chr1	19697400	19697530	chr1-19696881:19697425	chr1	19696881	19697425	chr1
chr1	19956330	19965921	0.068181818181818	-0.216674140549451	1	0.882352941176471	0.197224259527442	0.385593216482346	94	9.8721249445076e-09	HypoLow	chr1	19923604	19981504	Intron1	+	MINOS1-NBL1	protein_coding	chr1	19956330	19965921	1	0.165647668393782	*	*	*	*	*	0	0	*	*	*	*	*	0	0	chr1-19965785:19965990	chr1	19965785	19965990	chr1	19965785	19965921	chr1-19965789:19966166	chr1	19965789	19966166	chr1
chr1	20692927	20693396	0.509232026143791	-0.013111929979495	0.7	0.155870445344129	0.522292906902759	0.497038283351729	17	0.000162166444408843	HyperHigh	chr1	20688888	20700087	Intron10	-	RP4-749H3.1	lincRNA	chr1	20692927	20693396	1	0.0418787391731405	CpG: 110	chr1	20692582	20693534	chr1	20692927	20693396	chr1:20693127-20693202	chr1	20693127	20693202	chr1	20693127	20693202	chr1-20693045:20693415	chr1	20693045	20693415	chr1	20693045	20693396	chr1-20693333:20693617	chr1	20693333	20693617	chr1
chr1	20810028	20811811	0.208333333333334	0.227122784883751	0.363636363636364	0.0952380952380952	0.607675496904295	0.385593216482346	60	2.25380462029435e-05	HyperHigh	chr1	20808884	20810212	LastExon	-	CAMK2N1	protein_coding	chr1	20810028	20810212	0.103196859226024	0.13855421686747	*	*	*	*	*	0	0	*	*	*	*	*	0	0	chr1-20810020:20811875	chr1	20810020	20811875	chr1	20810028	20810212	chr1-20810202:20812383	chr1	20810202	20812383	chr1
chr1	20810028	20811811	0.208333333333334	0.227122784883751	0.363636363636364	0.0952380952380952	0.607675496904295	0.385593216482346	60	2.25380462029435e-05	HyperHigh	chr1	20810213	20811706	Intron1	-	CAMK2N1	protein_coding	chr1	20810213	20811706	0.837352776219854	1	CpG: 245	chr1	20810462	20813511	chr1	20810462	20811706	*	*	*	*	*	0	0	chr1-20810020:20811875	chr1	20810020	20811875	chr1	20810213	20811706	chr1-20811689:20812413	chr1	20811689	20812413	chr1
chr1	20810028	20811811	0.208333333333334	0.227122784883751	0.363636363636364	0.0952380952380952	0.607675496904295	0.385593216482346	60	2.25380462029435e-05	HyperHigh	chr1	20811707	20812713	FirstExon	-	CAMK2N1	protein_coding	chr1	20811707	20811811	0.0583286595625351	0.10337972166998	CpG: 245	chr1	20810462	20813511	chr1	20811707	20811811	*	*	*	*	*	0	0	chr1-20810020:20811875	chr1	20810020	20811875	chr1	20811707	20811811	chr1-20811689:20812413	chr1	20811689	20812413	chr1
chr1	20940742	20943029	0.0582922824302135	-0.208313550219945	1	0.911538461538462	0.206949200038446	0.405981480399941	23	0.0264167546032058	HypoLow	chr1	20940393	20944944	Intron3	+	CDA	protein_coding	chr1	20940742	20943029	1	0.502526917161063	*	*	*	*	*	0	0	*	*	*	*	*	0	0	chr1-20942665:20942815	chr1	20942665	20942815	chr1	20942665	20942815	chr1-20942902:20943402	chr1	20942902	20943402	chr1
chr1	21011687	21012402	0.133333333333333	-0.408131481801995	1	0.733333333333333	0	0.520426041486377	12	0.0467787499349542	HypoLow	chr1	21011514	21012538	Intron9	-	KIF17	protein_coding	chr1	21011687	21012402	1	0.6982421875	*	*	*	*	*	0	0	*	*	*	*	*	0	0	chr1-21012305:21012695	chr1	21012305	21012695	chr1	21012305	21012402	chr1-21011701:21011941	chr1	21011701	21011941	chr1
chr1	21043915	21044201	0.327380952380953	-0.0140246528378745	0.726190476190476	0.394086021505376	0.462764942780706	0.492669631252384	13	0.046149100814175	HyperHigh	chr1	21042133	21043968	Intron1	-	KIF17	protein_coding	chr1	21043915	21043968	0.185314685314685	0.0288828337874659	CpG: 109	chr1	21043832	21044771	chr1	21043915	21043968	*	*	*	*	*	0	0	chr1-21043860:21044975	chr1	21043860	21044975	chr1	21043915	21043968	chr1-21043937:21044255	chr1	21043937	21044255	chr1
chr1	21043915	21044201	0.327380952380953	-0.0140246528378745	0.726190476190476	0.394086021505376	0.462764942780706	0.492669631252384	13	0.046149100814175	HyperHigh	chr1	21043969	21044510	FirstExon	-	KIF17	protein_coding	chr1	21043969	21044201	0.811188811188811	0.428835489833641	CpG: 109	chr1	21043832	21044771	chr1	21043969	21044201	*	*	*	*	*	0	0	chr1-21043860:21044975	chr1	21043860	21044975	chr1	21043969	21044201	chr1-21043981:21044297	chr1	21043981	21044297	chr1
chr1	21370181	21375482	0.095238095238095	-0.24484330714649	0.96	0.833333333333333	0.222854814399865	0.453654682481227	32	0.000927995882718604	HypoLow	chr1	21329302	21377358	Intron4	-	EIF4G3	protein_coding	chr1	21370181	21375482	1	0.110308806392542	*	*	*	*	*	0	0	*	*	*	*	*	0	0	chr1-21375040:21375270	chr1	21375040	21375270	chr1	21375040	21375270	chr1-21374994:21375284	chr1	21374994	21375284	chr1
chr1	21639740	21641802	0.122807017543859	-0.260588228175012	0.928571428571429	0.8	0.240642698295787	0.518885569154274	22	0.0714799031727275	HypoLow	chr1	21616650	21671868	Intron1	-	ECE1	protein_coding	chr1	21639740	21641802	1	0.0373428954326488	*	*	*	*	*	0	0	*	*	*	*	*	0	0	chr1-21641020:21641270	chr1	21641020	21641270	chr1	21641020	21641270	chr1-21641636:21642086	chr1	21641636	21642086	chr1
chr1	21754557	21755270	0.208074534161491	-0.253611230209422	0.777777777777778	0.473684210526316	0.431912600179337	0.741533917571527	22	0.00308721200864911	HyperLow	*	*	*	InterGenic	*	*	*	*	*	*	*	*	CpG: 121	chr1	21754797	21755995	chr1	21754797	21755270	*	*	*	*	*	0	0	chr1-21754405:21755355	chr1	21754405	21755355	chr1	21754557	21755270	chr1-21753971:21754865	chr1	21753971	21754865	chr1
chr1	21763070	21763573	0.249046905118869	0.034948312193307	0.657142857142857	0.413095238095238	0.575037329477578	0.589143108287155	17	0.00741447583897094	HyperHigh	*	*	*	InterGenic	*	*	*	*	*	*	*	*	CpG: 34	chr1	21763070	21763416	chr1	21763070	21763416	*	*	*	*	*	0	0	chr1-21763140:21763515	chr1	21763140	21763515	chr1	21763140	21763515	chr1-21763040:21763298	chr1	21763040	21763298	chr1
chr1	21994817	21995518	0.0772442163571194	0.236389772383972	0.190909090909091	0.0350985221674877	0.492854240583328	0.289041557744597	19	0.0152407536243742	HypoHigh	chr1	21976290	21995746	Intron1	-	RAP1GAP	protein_coding	chr1	21994817	21995518	1	0.0360300164473684	CpG: 74	chr1	21995063	21995914	chr1	21995063	21995518	*	*	*	*	*	0	0	chr1-21994645:21995435	chr1	21994645	21995435	chr1	21994817	21995435	chr1-21995489:21996882	chr1	21995489	21996882	chr1
chr1	22110391	22110948	0.178571428571429	-0.278115674361751	1	0.789473684210526	0.130414521209752	0.482205555876069	14	0.00104477463926179	HypoLow	chr1	22110100	22111100	Promoter	-	USP48	protein_coding	chr1	22110391	22110948	1	0.557	*	*	*	*	*	0	0	*	*	*	*	*	0	0	chr1-22110900:22111075	chr1	22110900	22111075	chr1	22110900	22110948	chr1-22110888:22111536	chr1	22110888	22111536	chr1
chr1	22281875	22284037	-0.0944741532976825	0.317253995014791	0.877777777777778	0.942810457516339	0.44204024894756	0.0905940738665995	25	0.0120541278317881	HypoHigh	*	*	*	InterGenic	*	*	*	*	*	*	*	*	*	*	*	*	*	0	0	*	*	*	*	*	0	0	chr1-22283085:22283910	chr1	22283085	22283910	chr1	22283085	22283910	chr1-22283860:22284116	chr1	22283860	22284116	chr1
chr1	23279530	23280476	0.281730769230769	0.048898974963733	0.702941176470588	0.333333333333333	0.561742124285677	0.463209980249695	29	0.00530263147554251	HyperHigh	chr1	23279536	23280517	LastExon	-	LACTBL1	protein_coding	chr1	23279536	23280476	0.993657505285412	0.958205912334353	CpG: 129	chr1	23279553	23280569	chr1	23279553	23280476	*	*	*	*	*	0	0	chr1-23280320:23281535	chr1	23280320	23281535	chr1	23280320	23280476	chr1-23279802:23280298	chr1	23279802	23280298	chr1
chr1	23668690	23669126	0.395833333333333	0.254552325174831	0.611111111111111	0.16	0.733229264910443	0.43056399904602	10	0.00704717893829017	HyperHigh	chr1	23665102	23670703	Intron1	-	HNRNPR	protein_coding	chr1	23668690	23669126	1	0.0778432422781646	*	*	*	*	*	0	0	*	*	*	*	*	0	0	chr1-23668325:23669355	chr1	23668325	23669355	chr1	23668690	23669126	chr1-23668919:23669403	chr1	23668919	23669403	chr1
chr1	23880590	23880998	0.215789473684211	0.28376504689726	0.421052631578947	0.166666666666667	0.686271296777067	0.270426041486378	12	0.0335964345252271	HyperHigh	*	*	*	InterGenic	*	*	*	*	*	*	*	*	*	*	*	*	*	0	0	*	*	*	*	*	0	0	chr1-23880745:23881255	chr1	23880745	23881255	chr1	23880745	23880998	chr1-23880993:23881135	chr1	23880993	23881135	chr1
chr1	24022313	24026699	0.063492063492063	-0.2121402243384	0.96	0.904761904761905	0.167752778258549	0.412213580647056	44	2.94476624713717e-05	HypoLow	chr1	24022288	24022398	Exon5	+	RPL11	protein_coding	chr1	24022313	24022398	0.0193798449612403	0.772727272727273	*	*	*	*	*	0	0	*	*	*	*	*	0	0	*	*	*	*	*	0	0	chr1-24022164:24022747	chr1	24022164	24022747	chr1
chr1	24022313	24026699	0.063492063492063	-0.2121402243384	0.96	0.904761904761905	0.167752778258549	0.412213580647056	44	2.94476624713717e-05	HypoLow	chr1	24022399	24022833	Intron5	+	RPL11	protein_coding	chr1	24022399	24022833	0.0989512083903329	1	*	*	*	*	*	0	0	*	*	*	*	*	0	0	chr1-24022485:24022770	chr1	24022485	24022770	chr1	24022485	24022770	chr1-24022164:24022747	chr1	24022164	24022747	chr1
chr1	24022313	24026699	0.063492063492063	-0.2121402243384	0.96	0.904761904761905	0.167752778258549	0.412213580647056	44	2.94476624713717e-05	HypoLow	chr1	24022834	24022915	LastExon	+	RPL11	protein_coding	chr1	24022834	24022915	0.0184678522571819	1	*	*	*	*	*	0	0	*	*	*	*	*	0	0	chr1-24022880:24023470	chr1	24022880	24023470	chr1	24022880	24022915	chr1-24022852:24023232	chr1	24022852	24023232	chr1
chr1	24126260	24126566	0.228571428571429	0.328099061080403	0.588235294117647	0.2	0.745308783543011	0.432931646898466	12	0.065741880417126	HyperHigh	chr1	24125927	24126876	Intron1	-	GALE	protein_coding	chr1	24126260	24126566	1	0.322444678609062	*	*	*	*	*	0	0	*	*	*	*	*	0	0	chr1-24126000:24127115	chr1	24126000	24127115	chr1	24126260	24126566	chr1-24126540:24126944	chr1	24126540	24126944	chr1
chr1	24485736	24488207	0.105555555555556	-0.272800824138109	1	0.882352941176471	0.157125886949527	0.368352163123342	33	0.000211032259086043	HypoLow	chr1	24485673	24485963	Intron5	-	IFNLR1	protein_coding	chr1	24485736	24485963	0.0918656414407123	0.782758620689655	*	*	*	*	*	0	0	*	*	*	*	*	0	0	*	*	*	*	*	0	0	*	*	*	*	*
chr1	24485736	24488207	0.105555555555556	-0.272800824138109	1	0.882352941176471	0.157125886949527	0.368352163123342	33	0.000211032259086043	HypoLow	chr1	24485964	24486123	Exon5	-	IFNLR1	protein_coding	chr1	24485964	24486123	0.0643464184540672	1	*	*	*	*	*	0	0	*	*	*	*	*	0	0	*	*	*	*	*	0	0	*	*	*	*	*
chr1	24485736	24488207	0.105555555555556	-0.272800824138109	1	0.882352941176471	0.157125886949527	0.368352163123342	33	0.000211032259086043	HypoLow	chr1	24486124	24488031	Intron4	-	IFNLR1	protein_coding	chr1	24486124	24488031	0.77175232699312	1	*	*	*	*	*	0	0	*	*	*	*	*	0	0	chr1-24487800:24488135	chr1	24487800	24488135	chr1	24487800	24488031	chr1-24486350:24486906	chr1	24486350	24486906	chr1
chr1	24485736	24488207	0.105555555555556	-0.272800824138109	1	0.882352941176471	0.157125886949527	0.368352163123342	33	0.000211032259086043	HypoLow	chr1	24488032	24488174	Exon4	-	IFNLR1	protein_coding	chr1	24488032	24488174	0.0574666127074059	1	*	*	*	*	*	0	0	*	*	*	*	*	0	0	chr1-24487800:24488135	chr1	24487800	24488135	chr1	24488032	24488135	*	*	*	*	*
chr1	24485736	24488207	0.105555555555556	-0.272800824138109	1	0.882352941176471	0.157125886949527	0.368352163123342	33	0.000211032259086043	HypoLow	chr1	24488175	24495906	Intron3	-	IFNLR1	protein_coding	chr1	24488175	24488207	0.0129502225819506	0.00413917992497736	*	*	*	*	*	0	0	*	*	*	*	*	0	0	*	*	*	*	*	0	0	*	*	*	*	*
chr1	24667760	24667980	-0.444444444444445	0.057485454758792	0.333333333333333	0.777777777777778	0.686271296777067	0.557931646898466	8	0.00716238345574619	HypoHigh	chr1	24666253	24668604	Intron8	+	GRHL3	protein_coding	chr1	24667760	24667980	1	0.0935772011909826	*	*	*	*	*	0	0	*	*	*	*	*	0	0	chr1-24667825:24668055	chr1	24667825	24668055	chr1	24667825	24667980	chr1-24667922:24668050	chr1	24667922	24668050	chr1
chr1	25995294	26001999	0.08695652173913	-0.243764521359317	0.944444444444444	0.888888888888889	0.181188147733199	0.41066059380038	64	5.64014039336615e-08	HypoLow	chr1	25944829	26012930	Intron1	+	MAN1C1	protein_coding	chr1	25995294	26001999	1	0.0984567040131569	*	*	*	*	*	0	0	*	*	*	*	*	0	0	chr1-26001300:26001495	chr1	26001300	26001495	chr1	26001300	26001495	chr1-26001018:26001216	chr1	26001018	26001216	chr1
chr1	26081297	26084804	0.071661998132586	-0.247551812165522	0.9375	0.849090909090909	0.236961822462266	0.423244245395348	43	0.0253058029701936	HypoLow	chr1	26080070	26085082	Intron5	+	MAN1C1	protein_coding	chr1	26081297	26084804	1	0.699720670391061	*	*	*	*	*	0	0	chr1:26081315-26081453	chr1	26081315	26081453	chr1	26081315	26081453	chr1-26084340:26084675	chr1	26084340	26084675	chr1	26084340	26084675	chr1-26084649:26085125	chr1	26084649	26085125	chr1
chr1	26316860	26317697	0.23434829059829	0.113160443547682	0.689903846153846	0.388888888888889	0.5	0.5	17	0.0331385817030675	HyperHigh	chr1	26316093	26317217	Intron2	-	PAFAH2	protein_coding	chr1	26316860	26317217	0.426523297491039	0.317615658362989	*	*	*	*	*	0	0	*	*	*	*	*	0	0	*	*	*	*	*	0	0	*	*	*	*	*
chr1	26316860	26317697	0.23434829059829	0.113160443547682	0.689903846153846	0.388888888888889	0.5	0.5	17	0.0331385817030675	HyperHigh	chr1	26317218	26317354	Exon2	-	PAFAH2	protein_coding	chr1	26317218	26317354	0.162485065710872	1	*	*	*	*	*	0	0	*	*	*	*	*	0	0	chr1-26317280:26317495	chr1	26317280	26317495	chr1	26317280	26317354	*	*	*	*	*
chr1	26316860	26317697	0.23434829059829	0.113160443547682	0.689903846153846	0.388888888888889	0.5	0.5	17	0.0331385817030675	HyperHigh	chr1	26317355	26324515	Intron1	-	PAFAH2	protein_coding	chr1	26317355	26317697	0.408602150537634	0.0477653631284916	*	*	*	*	*	0	0	*	*	*	*	*	0	0	chr1-26317640:26317790	chr1	26317640	26317790	chr1	26317640	26317697	chr1-26317580:26317925	chr1	26317580	26317925	chr1
chr1	26366352	26369684	0.0352272727272725	-0.215726051029275	0.923076923076923	0.848076923076923	0.297358741918619	0.508132490115899	41	0.076752087415728	HypoLow	chr1	26366268	26366402	Exon6	-	SLC30A2	protein_coding	chr1	26366352	26366402	0.0150060024009604	0.373134328358209	*	*	*	*	*	0	0	*	*	*	*	*	0	0	chr1-26366125:26366430	chr1	26366125	26366430	chr1	26366352	26366402	*	*	*	*	*
chr1	26366352	26369684	0.0352272727272725	-0.215726051029275	0.923076923076923	0.848076923076923	0.297358741918619	0.508132490115899	41	0.076752087415728	HypoLow	chr1	26366403	26368190	Intron5	-	SLC30A2	protein_coding	chr1	26366403	26368190	0.536314525810324	1	*	*	*	*	*	0	0	*	*	*	*	*	0	0	chr1-26367985:26368275	chr1	26367985	26368275	chr1	26367985	26368190	chr1-26366539:26366995	chr1	26366539	26366995	chr1
chr1	26366352	26369684	0.0352272727272725	-0.215726051029275	0.923076923076923	0.848076923076923	0.297358741918619	0.508132490115899	41	0.076752087415728	HypoLow	chr1	26368191	26368296	Exon5	-	SLC30A2	protein_coding	chr1	26368191	26368296	0.0315126050420168	1	*	*	*	*	*	0	0	*	*	*	*	*	0	0	chr1-26367985:26368275	chr1	26367985	26368275	chr1	26368191	26368275	*	*	*	*	*
chr1	26366352	26369684	0.0352272727272725	-0.215726051029275	0.923076923076923	0.848076923076923	0.297358741918619	0.508132490115899	41	0.076752087415728	HypoLow	chr1	26368297	26369039	Intron4	-	SLC30A2	protein_coding	chr1	26368297	26369039	0.222689075630252	1	*	*	*	*	*	0	0	*	*	*	*	*	0	0	chr1-26368345:26368575	chr1	26368345	26368575	chr1	26368345	26368575	chr1-26368902:26369242	chr1	26368902	26369242	chr1
chr1	26366352	26369684	0.0352272727272725	-0.215726051029275	0.923076923076923	0.848076923076923	0.297358741918619	0.508132490115899	41	0.076752087415728	HypoLow	chr1	26369040	26369199	Exon4	-	SLC30A2	protein_coding	chr1	26369040	26369199	0.047719087635054	1	*	*	*	*	*	0	0	*	*	*	*	*	0	0	*	*	*	*	*	0	0	chr1-26369161:26369745	chr1	26369161	26369745	chr1
chr1	26366352	26369684	0.0352272727272725	-0.215726051029275	0.923076923076923	0.848076923076923	0.297358741918619	0.508132490115899	41	0.076752087415728	HypoLow	chr1	26369200	26369888	Intron3	-	SLC30A2	protein_coding	chr1	26369200	26369684	0.145258103241297	0.703488372093023	*	*	*	*	*	0	0	*	*	*	*	*	0	0	*	*	*	*	*	0	0	chr1-26369161:26369745	chr1	26369161	26369745	chr1
chr1	26645927	26646534	0.236099865047234	-0.403016674946753	0.912878787878788	0.695046439628483	0.174470462995874	0.553706750950892	13	0.00195546984638925	HyperLow	chr1	26644563	26646661	Intron1	+	CD52	protein_coding	chr1	26645927	26646534	1	0.28932316491897	*	*	*	*	*	0	0	*	*	*	*	*	0	0	chr1-26646080:26646335	chr1	26646080	26646335	chr1	26646080	26646335	chr1-26646400:26646836	chr1	26646400	26646836	chr1
chr1	26691609	26692398	0.366666666666667	-0.035555180402516	0.7	0.142857142857143	0.468546354076522	0.382944951426972	10	0.0117182833782509	HyperHigh	chr1	26691023	26691717	Exon4	-	ZNF683	protein_coding	chr1	26691609	26691717	0.136882129277567	0.155619596541787	*	*	*	*	*	0	0	*	*	*	*	*	0	0	*	*	*	*	*	0	0	*	*	*	*	*
chr1	26691609	26692398	0.366666666666667	-0.035555180402516	0.7	0.142857142857143	0.468546354076522	0.382944951426972	10	0.0117182833782509	HyperHigh	chr1	26691718	26694083	Intron3	-	ZNF683	protein_coding	chr1	26691718	26692398	0.861850443599493	0.287526427061311	*	*	*	*	*	0	0	*	*	*	*	*	0	0	chr1-26691865:26692015	chr1	26691865	26692015	chr1	26691865	26692015	*	*	*	*	*
chr1	27227192	27227605	0.275641025641025	-0.216674140549451	0.875	0.5	0.197224259527442	0.365265085000311	12	0.0343733404990091	HyperLow	chr1	27226958	27227958	Promoter	-	GPATCH3	protein_coding	chr1	27227192	27227605	1	0.413	*	*	*	*	*	0	0	*	*	*	*	*	0	0	chr1-27227400:27227435	chr1	27227400	27227435	chr1	27227400	27227435	chr1-27227601:27228235	chr1	27227601	27228235	chr1
chr1	27708157	27709574	-0.080952380952381	0.232320087795775	0.854166666666667	1	0.455135599207355	0.228658419422619	21	0.00747681949390804	HypoHigh	chr1	27706686	27708269	Intron4	-	CD164L2	protein_coding	chr1	27708157	27708269	0.0790402258292167	0.0707517372078332	*	*	*	*	*	0	0	*	*	*	*	*	0	0	*	*	*	*	*	0	0	chr1-27707978:27708434	chr1	27707978	27708434	chr1
chr1	27708157	27709574	-0.080952380952381	0.232320087795775	0.854166666666667	1	0.455135599207355	0.228658419422619	21	0.00747681949390804	HypoHigh	chr1	27708270	27708314	Exon4	-	CD164L2	protein_coding	chr1	27708270	27708314	0.0310515172900494	1	*	*	*	*	*	0	0	*	*	*	*	*	0	0	*	*	*	*	*	0	0	chr1-27707978:27708434	chr1	27707978	27708434	chr1
chr1	27708157	27709574	-0.080952380952381	0.232320087795775	0.854166666666667	1	0.455135599207355	0.228658419422619	21	0.00747681949390804	HypoHigh	chr1	27708315	27708817	Intron3	-	CD164L2	protein_coding	chr1	27708315	27708817	0.354269583627382	1	*	*	*	*	*	0	0	*	*	*	*	*	0	0	chr1-27708465:27708935	chr1	27708465	27708935	chr1	27708465	27708817	chr1-27708565:27708805	chr1	27708565	27708805	chr1
chr1	27708157	27709574	-0.080952380952381	0.232320087795775	0.854166666666667	1	0.455135599207355	0.228658419422619	21	0.00747681949390804	HypoHigh	chr1	27708818	27708889	Exon3	-	CD164L2	protein_coding	chr1	27708818	27708889	0.050105857445307	1	*	*	*	*	*	0	0	*	*	*	*	*	0	0	chr1-27708465:27708935	chr1	27708465	27708935	chr1	27708818	27708889	*	*	*	*	*
chr1	27708157	27709574	-0.080952380952381	0.232320087795775	0.854166666666667	1	0.455135599207355	0.228658419422619	21	0.00747681949390804	HypoHigh	chr1	27708890	27708989	Intron2	-	CD164L2	protein_coding	chr1	27708890	27708989	0.0698659139026112	1	*	*	*	*	*	0	0	*	*	*	*	*	0	0	chr1-27708465:27708935	chr1	27708465	27708935	chr1	27708890	27708935	*	*	*	*	*
chr1	27708157	27709574	-0.080952380952381	0.232320087795775	0.854166666666667	1	0.455135599207355	0.228658419422619	21	0.00747681949390804	HypoHigh	chr1	27708990	27709157	Exon2	-	CD164L2	protein_coding	chr1	27708990	27709157	0.117854622441778	1	*	*	*	*	*	0	0	*	*	*	*	*	0	0	chr1-27709145:27709435	chr1	27709145	27709435	chr1	27709145	27709157	*	*	*	*	*
chr1	27708157	27709574	-0.080952380952381	0.232320087795775	0.854166666666667	1	0.455135599207355	0.228658419422619	21	0.00747681949390804	HypoHigh	chr1	27709158	27709641	Intron1	-	CD164L2	protein_coding	chr1	27709158	27709574	0.293577981651376	0.86128364389234	*	*	*	*	*	0	0	*	*	*	*	*	0	0	chr1-27709525:27709695	chr1	27709525	27709695	chr1	27709525	27709574	chr1-27709560:27710143	chr1	27709560	27710143	chr1
chr1	27849622	27850462	-0.125	0.362061049898789	0.833333333333333	0.952380952380952	0.5	0.15633186452976	12	0.0300060295364026	HypoHigh	*	*	*	InterGenic	*	*	*	*	*	*	*	*	*	*	*	*	*	0	0	*	*	*	*	*	0	0	chr1-27850405:27850555	chr1	27850405	27850555	chr1	27850405	27850462	chr1-27850397:27850985	chr1	27850397	27850985	chr1
chr1	28370389	28377919	0.041666666666667	-0.202647585691837	1	0.921296296296297	0.130841529490752	0.372934267085635	53	0.00693691031894669	HypoLow	chr1	28369162	28374893	Intron3	-	EYA3	protein_coding	chr1	28370389	28374893	0.598140770252324	0.785901238876287	*	*	*	*	*	0	0	*	*	*	*	*	0	0	chr1-28373320:28373510	chr1	28373320	28373510	chr1	28373320	28373510	chr1-28374136:28374592	chr1	28374136	28374592	chr1
chr1	28370389	28377919	0.041666666666667	-0.202647585691837	1	0.921296296296297	0.130841529490752	0.372934267085635	53	0.00693691031894669	HypoLow	chr1	28374894	28374937	Exon3	-	EYA3	protein_coding	chr1	28374894	28374937	0.00571049136786189	1	*	*	*	*	*	0	0	*	*	*	*	*	0	0	*	*	*	*	*	0	0	*	*	*	*	*
chr1	28370389	28377919	0.041666666666667	-0.202647585691837	1	0.921296296296297	0.130841529490752	0.372934267085635	53	0.00693691031894669	HypoLow	chr1	28374938	28384504	Intron2	-	EYA3	protein_coding	chr1	28374938	28377919	0.395883134130146	0.311624503449718	*	*	*	*	*	0	0	*	*	*	*	*	0	0	chr1-28377340:28377590	chr1	28377340	28377590	chr1	28377340	28377590	chr1-28377291:28377567	chr1	28377291	28377567	chr1
chr1	28499823	28503937	0.121497326203208	-0.203273613136025	0.9	0.755	0.254734835502873	0.479539240901385	59	0.000274924004580434	HypoLow	chr1	28477571	28520232	Intron1	-	PTAFR	protein_coding	chr1	28499823	28503937	1	0.0964346827313003	*	*	*	*	*	0	0	chr1:28501131-28502017	chr1	28501131	28502017	chr1	28501131	28502017	chr1-28503600:28503955	chr1	28503600	28503955	chr1	28503600	28503937	chr1-28503825:28504000	chr1	28503825	28504000	chr1
chr1	28736508	28737085	0.2	-0.243233690833487	1	0.461538461538462	0.287706856188877	0.49830628274465	10	0.0256235062197717	-	chr1	28733975	28785595	Intron2	+	PHACTR4	protein_coding	chr1	28736508	28737085	1	0.0111778380472685	*	*	*	*	*	0	0	*	*	*	*	*	0	0	chr1-28736280:28736690	chr1	28736280	28736690	chr1	28736508	28736690	chr1-28737057:28737501	chr1	28737057	28737501	chr1
chr1	30085458	30089714	0.0272578728461075	-0.285941644020329	0.898989898989899	0.878676470588236	0.255534369891082	0.516264980231799	27	0.445791094511793	HypoLow	*	*	*	InterGenic	*	*	*	*	*	*	*	*	*	*	*	*	*	0	0	*	*	*	*	*	0	0	*	*	*	*	*	0	0	*	*	*	*	*
chr1	30275669	30278631	0.145656565656565	-0.315806023348424	1	0.718253968253968	0.228658419422619	0.536806290195389	31	0.000294931683250275	HypoLow	*	*	*	InterGenic	*	*	*	*	*	*	*	*	*	*	*	*	*	0	0	*	*	*	*	*	0	0	chr1-30278605:30278875	chr1	30278605	30278875	chr1	30278605	30278631	chr1-30278144:30278393	chr1	30278144	30278393	chr1
chr1	30759489	30762904	-0.00909090909090898	-0.273078559253139	0.9	0.825757575757575	0.228658419422619	0.540481267320664	25	0.395553465820429	HypoLow	*	*	*	InterGenic	*	*	*	*	*	*	*	*	*	*	*	*	*	0	0	*	*	*	*	*	0	0	chr1-30762525:30762675	chr1	30762525	30762675	chr1	30762525	30762675	chr1-30759839:30760275	chr1	30759839	30760275	chr1
chr1	31190645	31190875	0.345334685598377	0.328566892217379	0.654761904761905	0.101724137931035	0.63943194468483	0.329916713312894	9	0.0354207047831773	HyperHigh	chr1	31189763	31191581	Intron3	-	MATN1	protein_coding	chr1	31190645	31190875	1	0.126512651265127	*	*	*	*	*	0	0	*	*	*	*	*	0	0	chr1-31190805:31192750	chr1	31190805	31192750	chr1	31190805	31190875	chr1-31190872:31191315	chr1	31190872	31191315	chr1
chr1	31190645	31190875	0.345334685598377	0.328566892217379	0.654761904761905	0.101724137931035	0.63943194468483	0.329916713312894	9	0.0354207047831773	HyperHigh	chr1	31190350	31191350	Promoter	+	MATN1-AS1	antisense	chr1	31190645	31190875	1	0.23	*	*	*	*	*	0	0	*	*	*	*	*	0	0	chr1-31190805:31192750	chr1	31190805	31192750	chr1	31190805	31190875	chr1-31190872:31191315	chr1	31190872	31191315	chr1
chr1	31233502	31233893	0.220517676767677	0.201259986495134	0.35625	0.0625	0.540185808342531	0.237208461695545	11	0.0277727127504386	HyperHigh	*	*	*	InterGenic	*	*	*	*	*	*	*	*	*	*	*	*	*	0	0	chr1:31233848-31234393	chr1	31233848	31234393	chr1	31233848	31233893	chr1-31233560:31233910	chr1	31233560	31233910	chr1	31233560	31233893	chr1-31233879:31234255	chr1	31233879	31234255	chr1
chr1	32169415	32170421	0.319852941176471	0.247668787489756	0.6	0.105263157894737	0.61412366439237	0.431820614746107	26	1.96820698039743e-05	HyperHigh	chr1	32167829	32169437	Intron1	-	COL16A1	protein_coding	chr1	32169415	32169437	0.0218687872763419	0.013681592039801	*	*	*	*	*	0	0	*	*	*	*	*	0	0	chr1-32169340:32169915	chr1	32169340	32169915	chr1	32169415	32169437	chr1-32169369:32169769	chr1	32169369	32169769	chr1
chr1	32169415	32170421	0.319852941176471	0.247668787489756	0.6	0.105263157894737	0.61412366439237	0.431820614746107	26	1.96820698039743e-05	HyperHigh	chr1	32169438	32169920	FirstExon	-	COL16A1	protein_coding	chr1	32169438	32169920	0.479125248508946	1	CpG: 27	chr1	32169537	32169869	chr1	32169537	32169869	*	*	*	*	*	0	0	chr1-32169340:32169915	chr1	32169340	32169915	chr1	32169438	32169915	chr1-32169589:32170039	chr1	32169589	32170039	chr1
chr1	32169415	32170421	0.319852941176471	0.247668787489756	0.6	0.105263157894737	0.61412366439237	0.431820614746107	26	1.96820698039743e-05	HyperHigh	chr1	32169921	32170921	Promoter	-	COL16A1	protein_coding	chr1	32169921	32170421	0.497017892644135	0.5	*	*	*	*	*	0	0	*	*	*	*	*	0	0	chr1-32170005:32170775	chr1	32170005	32170775	chr1	32170005	32170421	chr1-32170370:32170595	chr1	32170370	32170595	chr1
chr1	32180605	32181516	0.156920077972709	0.329626189697684	0.366666666666666	0.0892857142857142	0.61157763923065	0.300536499019676	31	0.000542585800344033	HypoHigh	*	*	*	InterGenic	*	*	*	*	*	*	*	*	*	*	*	*	*	0	0	chr1:32180603-32180986	chr1	32180603	32180986	chr1	32180605	32180986	chr1-32181065:32181495	chr1	32181065	32181495	chr1	32181065	32181495	chr1-32181515:32181891	chr1	32181515	32181891	chr1
chr1	32290585	32291225	-0.234299516908213	0.408131481801995	0.722222222222222	1	0.518885569154274	0	12	0.000230428318922079	HypoHigh	*	*	*	InterGenic	*	*	*	*	*	*	*	*	*	*	*	*	*	0	0	*	*	*	*	*	0	0	*	*	*	*	*	0	0	chr1-32290997:32291170	chr1	32290997	32291170	chr1
chr1	32800063	32800685	0.217194570135747	0.216340833189103	0.285714285714286	0.0769230769230769	0.332263877327212	0.216674140549451	14	0.0538976021517059	HyperHigh	chr1	32799433	32800698	LastExon	-	MARCKSL1	protein_coding	chr1	32800063	32800685	1	0.491699604743083	*	*	*	*	*	0	0	*	*	*	*	*	0	0	chr1-32800600:32801370	chr1	32800600	32801370	chr1	32800600	32800685	chr1-32800684:32801180	chr1	32800684	32801180	chr1
chr1	32827265	32828104	0.266666666666666	0.101127777457264	0.454545454545455	0.117647058823529	0.472765278018163	0.408131481801995	30	0.000503023349356724	HyperHigh	chr1	32826797	32827797	Promoter	+	TSSK3	protein_coding	chr1	32827265	32827797	0.634088200238379	0.532	CpG: 109	chr1	32826944	32828017	chr1	32827265	32827797	*	*	*	*	*	0	0	chr1-32826525:32828615	chr1	32826525	32828615	chr1	32827265	32827797	chr1-32827775:32828433	chr1	32827775	32828433	chr1
chr1	32827265	32828104	0.266666666666666	0.101127777457264	0.454545454545455	0.117647058823529	0.472765278018163	0.408131481801995	30	0.000503023349356724	HyperHigh	chr1	32827798	32828447	FirstExon	+	TSSK3	protein_coding	chr1	32827798	32828104	0.364719904648391	0.471494607087827	CpG: 109	chr1	32826944	32828017	chr1	32827798	32828017	*	*	*	*	*	0	0	chr1-32826525:32828615	chr1	32826525	32828615	chr1	32827798	32828104	chr1-32827775:32828433	chr1	32827775	32828433	chr1
chr1	32827265	32828104	0.266666666666666	0.101127777457264	0.454545454545455	0.117647058823529	0.472765278018163	0.408131481801995	30	0.000503023349356724	HyperHigh	chr1	32827330	32827477	LastExon	-	FAM229A	protein_coding	chr1	32827330	32827477	0.175208581644815	1	CpG: 109	chr1	32826944	32828017	chr1	32827330	32827477	*	*	*	*	*	0	0	chr1-32826525:32828615	chr1	32826525	32828615	chr1	32827330	32827477	chr1-32827472:32827982	chr1	32827472	32827982	chr1
chr1	32827265	32828104	0.266666666666666	0.101127777457264	0.454545454545455	0.117647058823529	0.472765278018163	0.408131481801995	30	0.000503023349356724	HyperHigh	chr1	32827478	32827558	Intron2	-	FAM229A	protein_coding	chr1	32827478	32827558	0.0953516090584029	1	CpG: 109	chr1	32826944	32828017	chr1	32827478	32827558	*	*	*	*	*	0	0	chr1-32826525:32828615	chr1	32826525	32828615	chr1	32827478	32827558	chr1-32827554:32827984	chr1	32827554	32827984	chr1
chr1	32827265	32828104	0.266666666666666	0.101127777457264	0.454545454545455	0.117647058823529	0.472765278018163	0.408131481801995	30	0.000503023349356724	HyperHigh	chr1	32827559	32827652	Exon2	-	FAM229A	protein_coding	chr1	32827559	32827652	0.110846245530393	1	CpG: 109	chr1	32826944	32828017	chr1	32827559	32827652	*	*	*	*	*	0	0	chr1-32826525:32828615	chr1	32826525	32828615	chr1	32827559	32827652	chr1-32827632:32828060	chr1	32827632	32828060	chr1
chr1	32827265	32828104	0.266666666666666	0.101127777457264	0.454545454545455	0.117647058823529	0.472765278018163	0.408131481801995	30	0.000503023349356724	HyperHigh	chr1	32827653	32829675	Intron1	-	FAM229A	protein_coding	chr1	32827653	32828104	0.537544696066746	0.223046488625124	CpG: 109	chr1	32826944	32828017	chr1	32827653	32828017	*	*	*	*	*	0	0	chr1-32826525:32828615	chr1	32826525	32828615	chr1	32827653	32828104	chr1-32827775:32828433	chr1	32827775	32828433	chr1
chr1	32922627	32928409	0.111111111111111	-0.23261661429584	0.9	0.8	0.306098611351497	0.550007473882785	42	0.00157660645543404	HypoLow	*	*	*	InterGenic	*	*	*	*	*	*	*	*	*	*	*	*	*	0	0	*	*	*	*	*	0	0	chr1-32927345:32927495	chr1	32927345	32927495	chr1	32927345	32927495	chr1-32924525:32924741	chr1	32924525	32924741	chr1
chr1	32930256	32930983	0.263049450549451	-0.088707689977898	0.642857142857143	0.3	0.513251354712389	0.584358277528082	25	0.000343673920122911	HyperHigh	chr1	32929657	32930657	Promoter	+	RP1-27O5.3	protein_coding	chr1	32930256	32930657	0.551581843191197	0.401	CpG: 54	chr1	32930500	32931061	chr1	32930500	32930657	*	*	*	*	*	0	0	chr1-32929740:32930775	chr1	32929740	32930775	chr1	32930256	32930657	chr1-32930655:32931299	chr1	32930655	32931299	chr1
chr1	32930256	32930983	0.263049450549451	-0.088707689977898	0.642857142857143	0.3	0.513251354712389	0.584358277528082	25	0.000343673920122911	HyperHigh	chr1	32930658	32930706	FirstExon	+	RP1-27O5.3	protein_coding	chr1	32930658	32930706	0.0660247592847318	1	CpG: 54	chr1	32930500	32931061	chr1	32930658	32930706	*	*	*	*	*	0	0	chr1-32929740:32930775	chr1	32929740	32930775	chr1	32930658	32930706	chr1-32930655:32931299	chr1	32930655	32931299	chr1
chr1	32930256	32930983	0.263049450549451	-0.088707689977898	0.642857142857143	0.3	0.513251354712389	0.584358277528082	25	0.000343673920122911	HyperHigh	chr1	32930707	32936184	Intron1	+	RP1-27O5.3	protein_coding	chr1	32930707	32930983	0.379642365887208	0.0503925506664232	CpG: 54	chr1	32930500	32931061	chr1	32930707	32930983	*	*	*	*	*	0	0	chr1-32930825:32931175	chr1	32930825	32931175	chr1	32930825	32930983	chr1-32930751:32931187	chr1	32930751	32931187	chr1
chr1	32930256	32930983	0.263049450549451	-0.088707689977898	0.642857142857143	0.3	0.513251354712389	0.584358277528082	25	0.000343673920122911	HyperHigh	chr1	32929669	32930669	Promoter	+	ZBTB8B	protein_coding	chr1	32930256	32930669	0.56808803301238	0.413	CpG: 54	chr1	32930500	32931061	chr1	32930500	32930669	*	*	*	*	*	0	0	chr1-32929740:32930775	chr1	32929740	32930775	chr1	32930256	32930669	chr1-32930655:32931299	chr1	32930655	32931299	chr1
chr1	32930256	32930983	0.263049450549451	-0.088707689977898	0.642857142857143	0.3	0.513251354712389	0.584358277528082	25	0.000343673920122911	HyperHigh	chr1	32930670	32930706	FirstExon	+	ZBTB8B	protein_coding	chr1	32930670	32930706	0.0495185694635488	1	CpG: 54	chr1	32930500	32931061	chr1	32930670	32930706	*	*	*	*	*	0	0	chr1-32929740:32930775	chr1	32929740	32930775	chr1	32930670	32930706	chr1-32930655:32931299	chr1	32930655	32931299	chr1
chr1	32930256	32930983	0.263049450549451	-0.088707689977898	0.642857142857143	0.3	0.513251354712389	0.584358277528082	25	0.000343673920122911	HyperHigh	chr1	32930707	32936184	Intron1	+	ZBTB8B	protein_coding	chr1	32930707	32930983	0.379642365887208	0.0503925506664232	CpG: 54	chr1	32930500	32931061	chr1	32930707	32930983	*	*	*	*	*	0	0	chr1-32930825:32931175	chr1	32930825	32931175	chr1	32930825	32930983	chr1-32930751:32931187	chr1	32930751	32931187	chr1
chr1	33063380	33070262	0.055555555555556	-0.204859662325852	1	0.904761904761905	0	0.267690575774701	68	6.88114226055575e-10	HypoLow	chr1	33060825	33065687	Intron9	+	RP1-27O5.3	protein_coding	chr1	33063380	33065687	0.335222319093287	0.474496092143151	*	*	*	*	*	0	0	*	*	*	*	*	0	0	chr1-33065685:33065855	chr1	33065685	33065855	chr1	33065685	33065687	chr1-33065614:33066018	chr1	33065614	33066018	chr1
chr1	33063380	33070262	0.055555555555556	-0.204859662325852	1	0.904761904761905	0	0.267690575774701	68	6.88114226055575e-10	HypoLow	chr1	33065688	33066393	LastExon	+	RP1-27O5.3	protein_coding	chr1	33065688	33066393	0.102441150828248	1	*	*	*	*	*	0	0	*	*	*	*	*	0	0	chr1-33065685:33065855	chr1	33065685	33065855	chr1	33065688	33065855	chr1-33065614:33066018	chr1	33065614	33066018	chr1
chr1	33063380	33070262	0.055555555555556	-0.204859662325852	1	0.904761904761905	0	0.267690575774701	68	6.88114226055575e-10	HypoLow	chr1	33060825	33065687	Intron4	+	ZBTB8A	protein_coding	chr1	33063380	33065687	0.335222319093287	0.474496092143151	*	*	*	*	*	0	0	*	*	*	*	*	0	0	chr1-33065685:33065855	chr1	33065685	33065855	chr1	33065685	33065687	chr1-33065614:33066018	chr1	33065614	33066018	chr1
chr1	33063380	33070262	0.055555555555556	-0.204859662325852	1	0.904761904761905	0	0.267690575774701	68	6.88114226055575e-10	HypoLow	chr1	33065688	33071540	LastExon	+	ZBTB8A	protein_coding	chr1	33065688	33070262	0.664632374309794	0.781613123718387	*	*	*	*	*	0	0	*	*	*	*	*	0	0	chr1-33070125:33070275	chr1	33070125	33070275	chr1	33070125	33070262	chr1-33070207:33070467	chr1	33070207	33070467	chr1
chr1	33063380	33070262	0.055555555555556	-0.204859662325852	1	0.904761904761905	0	0.267690575774701	68	6.88114226055575e-10	HypoLow	chr1	33065773	33065951	LastExon	-	ZBTB8OS	protein_coding	chr1	33065773	33065951	0.025864574251671	1	*	*	*	*	*	0	0	*	*	*	*	*	0	0	chr1-33065685:33065855	chr1	33065685	33065855	chr1	33065773	33065855	chr1-33065614:33066018	chr1	33065614	33066018	chr1
chr1	33063380	33070262	0.055555555555556	-0.204859662325852	1	0.904761904761905	0	0.267690575774701	68	6.88114226055575e-10	HypoLow	chr1	33065952	33116033	Intron1	-	ZBTB8OS	protein_coding	chr1	33065952	33070262	0.626271432723046	0.086060581857391	*	*	*	*	*	0	0	*	*	*	*	*	0	0	chr1-33070125:33070275	chr1	33070125	33070275	chr1	33070125	33070262	chr1-33070207:33070467	chr1	33070207	33070467	chr1
chr1	33468679	33472167	0.110011312217194	-0.300237674178051	0.976190476190476	0.856410256410256	0.146498995640504	0.459594497828725	23	0.000374237847886026	HypoLow	chr1	33452921	33496635	Intron1	+	RP1-117O3.2	antisense	chr1	33468679	33472167	1	0.0797913711854326	*	*	*	*	*	0	0	*	*	*	*	*	0	0	chr1-33472060:33472075	chr1	33472060	33472075	chr1	33472060	33472075	chr1-33471674:33472100	chr1	33471674	33472100	chr1
chr1	33772207	33772813	0.241567256273139	-0.339164395091018	0.942810457516339	0.686932849364791	0.277981848552328	0.700506785011811	19	6.01079399371466e-06	HyperLow	chr1	33772367	33773054	LastExon	-	A3GALT2	protein_coding	chr1	33772367	33772813	0.735973597359736	0.64919941775837	CpG: 123	chr1	33772146	33773104	chr1	33772367	33772813	*	*	*	*	*	0	0	chr1-33771720:33773055	chr1	33771720	33773055	chr1	33772367	33772813	chr1-33772795:33773299	chr1	33772795	33773299	chr1
chr1	33772207	33772813	0.241567256273139	-0.339164395091018	0.942810457516339	0.686932849364791	0.277981848552328	0.700506785011811	19	6.01079399371466e-06	HyperLow	chr1	33771971	33772971	Promoter	+	RP11-415J8.3	antisense	chr1	33772207	33772813	1	0.606	CpG: 123	chr1	33772146	33773104	chr1	33772207	33772813	*	*	*	*	*	0	0	chr1-33771720:33773055	chr1	33771720	33773055	chr1	33772207	33772813	chr1-33772795:33773299	chr1	33772795	33773299	chr1
chr1	34628437	34630843	0.24025974025974	0.133299461118261	0.454545454545455	0.129166666666666	0.528320833573719	0.453765784934677	71	5.8692854312939e-07	HyperHigh	*	*	*	InterGenic	*	*	*	*	*	*	*	*	CpG: 169	chr1	34628783	34630976	chr1	34628783	34630843	chr1:34628613-34629024	chr1	34628613	34629024	chr1	34628613	34629024	chr1-34630465:34630955	chr1	34630465	34630955	chr1	34630465	34630843	chr1-34630787:34630882	chr1	34630787	34630882	chr1
chr1	35631994	35637878	0.076923076923077	-0.204670635422163	1	0.866666666666667	0.146498995640504	0.330421420178476	62	2.31657312727647e-07	HypoLow	*	*	*	InterGenic	*	*	*	*	*	*	*	*	*	*	*	*	*	0	0	*	*	*	*	*	0	0	chr1-35637760:35637990	chr1	35637760	35637990	chr1	35637760	35637878	chr1-35637713:35638163	chr1	35637713	35638163	chr1
chr1	35656324	35657065	0.26540750915751	0.00845651669873049	0.779352226720648	0.42483660130719	0.499601762736763	0.574187303193511	13	0.00720934335825143	HyperHigh	chr1	35656295	35656596	Exon3	-	SFPQ	protein_coding	chr1	35656324	35656596	0.367071524966262	0.903654485049834	*	*	*	*	*	0	0	*	*	*	*	*	0	0	chr1-35656120:35656790	chr1	35656120	35656790	chr1	35656324	35656596	chr1-35656579:35657039	chr1	35656579	35657039	chr1
chr1	35656324	35657065	0.26540750915751	0.00845651669873049	0.779352226720648	0.42483660130719	0.499601762736763	0.574187303193511	13	0.00720934335825143	HyperHigh	chr1	35656597	35656941	Intron2	-	SFPQ	protein_coding	chr1	35656597	35656941	0.464237516869096	1	*	*	*	*	*	0	0	*	*	*	*	*	0	0	chr1-35656885:35657115	chr1	35656885	35657115	chr1	35656885	35656941	chr1-35656918:35657362	chr1	35656918	35657362	chr1
chr1	35656324	35657065	0.26540750915751	0.00845651669873049	0.779352226720648	0.42483660130719	0.499601762736763	0.574187303193511	13	0.00720934335825143	HyperHigh	chr1	35656942	35657130	Exon2	-	SFPQ	protein_coding	chr1	35656942	35657065	0.165991902834008	0.654255319148936	*	*	*	*	*	0	0	*	*	*	*	*	0	0	chr1-35656885:35657115	chr1	35656885	35657115	chr1	35656942	35657065	chr1-35657064:35657868	chr1	35657064	35657868	chr1
chr1	35694018	35702325	0.052631578947368	-0.216674140549451	1	0.9375	0	0.288618872485741	72	1.09341512288526e-08	HypoLow	*	*	*	InterGenic	*	*	*	*	*	*	*	*	*	*	*	*	*	0	0	*	*	*	*	*	0	0	chr1-35700825:35700975	chr1	35700825	35700975	chr1	35700825	35700975	chr1-35702180:35702700	chr1	35702180	35702700	chr1
chr1	36276811	36277583	0.230654761904762	-0.0402323659225154	0.768716577540107	0.243386243386243	0.469594543680479	0.498273495630788	19	0.0199846920217689	HyperHigh	chr1	36274037	36282482	Intron1	+	AGO4	protein_coding	chr1	36276811	36277583	1	0.0914150384843102	*	*	*	*	*	0	0	*	*	*	*	*	0	0	chr1-36277500:36277730	chr1	36277500	36277730	chr1	36277500	36277583	chr1-36277151:36277431	chr1	36277151	36277431	chr1
chr1	36312902	36316463	0.064180672268907	-0.382944951426972	0.933333333333333	0.875	0	0.382944951426972	23	0.000402709444599684	HypoLow	chr1	36307352	36315757	Intron15	+	AGO4	protein_coding	chr1	36312902	36315757	0.801741083965178	0.339678762641285	*	*	*	*	*	0	0	*	*	*	*	*	0	0	chr1-36315640:36315970	chr1	36315640	36315970	chr1	36315640	36315757	chr1-36315744:36316034	chr1	36315744	36316034	chr1
chr1	36312902	36316463	0.064180672268907	-0.382944951426972	0.933333333333333	0.875	0	0.382944951426972	23	0.000402709444599684	HypoLow	chr1	36315758	36315859	Exon16	+	AGO4	protein_coding	chr1	36315758	36315859	0.0283628194327436	1	*	*	*	*	*	0	0	*	*	*	*	*	0	0	chr1-36315640:36315970	chr1	36315640	36315970	chr1	36315758	36315859	chr1-36315744:36316034	chr1	36315744	36316034	chr1
chr1	36312902	36316463	0.064180672268907	-0.382944951426972	0.933333333333333	0.875	0	0.382944951426972	23	0.000402709444599684	HypoLow	chr1	36315860	36316454	Intron16	+	AGO4	protein_coding	chr1	36315860	36316454	0.166807076663858	1	*	*	*	*	*	0	0	*	*	*	*	*	0	0	chr1-36315640:36315970	chr1	36315640	36315970	chr1	36315860	36315970	chr1-36315744:36316034	chr1	36315744	36316034	chr1
chr1	36312902	36316463	0.064180672268907	-0.382944951426972	0.933333333333333	0.875	0	0.382944951426972	23	0.000402709444599684	HypoLow	chr1	36316455	36316654	Exon17	+	AGO4	protein_coding	chr1	36316455	36316463	0.0022465599550688	0.0402010050251256	*	*	*	*	*	0	0	*	*	*	*	*	0	0	*	*	*	*	*	0	0	*	*	*	*	*
chr1	36770206	36770958	0.269918868317038	-0.0239551367064	0.5	0.154761904761905	0.317253995014791	0.393671109048816	11	0.0307657462510394	HyperHigh	chr1	36769397	36770958	LastExon	+	THRAP3	protein_coding	chr1	36770206	36770958	1	0.481742472773863	*	*	*	*	*	0	0	*	*	*	*	*	0	0	chr1-36770640:36770815	chr1	36770640	36770815	chr1	36770640	36770815	chr1-36770935:36773138	chr1	36770935	36773138	chr1
chr1	36786335	36788130	0.238636363636363	0.042962020186802	0.392307692307693	0.0916666666666666	0.486382639009082	0.419518169165151	61	6.03403857202254e-07	HyperHigh	chr1	36785276	36786399	Exon11	+	SH3D21	protein_coding	chr1	36786335	36786399	0.0356545961002786	0.0569902048085485	*	*	*	*	*	0	0	*	*	*	*	*	0	0	chr1-36785825:36786395	chr1	36785825	36786395	chr1	36786335	36786395	chr1-36786378:36787430	chr1	36786378	36787430	chr1
chr1	36786335	36788130	0.238636363636363	0.042962020186802	0.392307692307693	0.0916666666666666	0.486382639009082	0.419518169165151	61	6.03403857202254e-07	HyperHigh	chr1	36786400	36786515	Intron11	+	SH3D21	protein_coding	chr1	36786400	36786515	0.064066852367688	1	CpG: 219	chr1	36786500	36789402	chr1	36786500	36786515	*	*	*	*	*	0	0	chr1-36786425:36786650	chr1	36786425	36786650	chr1	36786425	36786515	chr1-36786476:36787553	chr1	36786476	36787553	chr1
chr1	36786335	36788130	0.238636363636363	0.042962020186802	0.392307692307693	0.0916666666666666	0.486382639009082	0.419518169165151	61	6.03403857202254e-07	HyperHigh	chr1	36786516	36786579	Exon12	+	SH3D21	protein_coding	chr1	36786516	36786579	0.0350974930362117	1	CpG: 219	chr1	36786500	36789402	chr1	36786516	36786579	*	*	*	*	*	0	0	chr1-36786425:36786650	chr1	36786425	36786650	chr1	36786516	36786579	chr1-36786576:36787479	chr1	36786576	36787479	chr1
chr1	36786335	36788130	0.238636363636363	0.042962020186802	0.392307692307693	0.0916666666666666	0.486382639009082	0.419518169165151	61	6.03403857202254e-07	HyperHigh	chr1	36786580	36786656	Intron12	+	SH3D21	protein_coding	chr1	36786580	36786656	0.0423398328690808	1	CpG: 219	chr1	36786500	36789402	chr1	36786580	36786656	*	*	*	*	*	0	0	chr1-36786425:36786650	chr1	36786425	36786650	chr1	36786580	36786650	chr1-36786642:36787297	chr1	36786642	36787297	chr1
chr1	36786335	36788130	0.238636363636363	0.042962020186802	0.392307692307693	0.0916666666666666	0.486382639009082	0.419518169165151	61	6.03403857202254e-07	HyperHigh	chr1	36786657	36786832	LastExon	+	SH3D21	protein_coding	chr1	36786657	36786832	0.0974930362116992	1	CpG: 219	chr1	36786500	36789402	chr1	36786657	36786832	*	*	*	*	*	0	0	chr1-36786700:36789970	chr1	36786700	36789970	chr1	36786700	36786832	chr1-36786830:36787226	chr1	36786830	36787226	chr1
chr1	36786335	36788130	0.238636363636363	0.042962020186802	0.392307692307693	0.0916666666666666	0.486382639009082	0.419518169165151	61	6.03403857202254e-07	HyperHigh	chr1	36787632	36788326	LastExon	-	EVA1B	protein_coding	chr1	36787632	36788130	0.277437325905292	0.717579250720461	CpG: 219	chr1	36786500	36789402	chr1	36787632	36788130	*	*	*	*	*	0	0	chr1-36786700:36789970	chr1	36786700	36789970	chr1	36787632	36788130	chr1-36788122:36788378	chr1	36788122	36788378	chr1
chr1	36856117	36857647	0.147511312217194	-0.219297615153547	0.939338235294118	0.788888888888889	0.27397603162912	0.455927190488869	17	0.0055458103925215	HypoLow	chr1	36856839	36857205	LastExon	-	LSM10	protein_coding	chr1	36856839	36857205	0.23921568627451	1	*	*	*	*	*	0	0	*	*	*	*	*	0	0	chr1-36856865:36857170	chr1	36856865	36857170	chr1	36856865	36857170	chr1-36857021:36857431	chr1	36857021	36857431	chr1
chr1	36856117	36857647	0.147511312217194	-0.219297615153547	0.939338235294118	0.788888888888889	0.27397603162912	0.455927190488869	17	0.0055458103925215	HypoLow	chr1	36857206	36857958	Intron3	-	LSM10	protein_coding	chr1	36857206	36857647	0.288235294117647	0.586436170212766	*	*	*	*	*	0	0	*	*	*	*	*	0	0	*	*	*	*	*	0	0	chr1-36857021:36857431	chr1	36857021	36857431	chr1
chr1	36916578	36916940	0.130769230769231	-0.304294956732867	0.941176470588235	0.8125	0.15633186452976	0.432931646898466	14	0.0433700175484724	HypoLow	chr1	36916053	36917053	Promoter	-	OSCP1	protein_coding	chr1	36916578	36916940	1	0.362	*	*	*	*	*	0	0	*	*	*	*	*	0	0	chr1-36916320:36916775	chr1	36916320	36916775	chr1	36916578	36916775	chr1-36916837:36917002	chr1	36916837	36917002	chr1
chr1	37044550	37046599	0.097222222222222	-0.230885067435785	0.933333333333333	0.761904761904762	0.306098611351497	0.539063190864238	28	0.00495657659016803	HypoLow	*	*	*	InterGenic	*	*	*	*	*	*	*	*	*	*	*	*	*	0	0	*	*	*	*	*	0	0	chr1-37046220:37046435	chr1	37046220	37046435	chr1	37046220	37046435	chr1-37046172:37046952	chr1	37046172	37046952	chr1
chr1	37706561	37706794	0.281944444444444	-0.130745549542784	0.707264957264957	0.469230769230769	0.503654682481227	0.595434930859952	11	0.0309554806999333	HyperLow	*	*	*	InterGenic	*	*	*	*	*	*	*	*	*	*	*	*	*	0	0	*	*	*	*	*	0	0	chr1-37706465:37706855	chr1	37706465	37706855	chr1	37706561	37706794	chr1-37706444:37706728	chr1	37706444	37706728	chr1
chr1	37949172	37951466	0.109090909090909	-0.248459527667896	0.928571428571429	0.833333333333333	0.15633186452976	0.382944951426972	28	0.000562861938197446	HypoLow	chr1	37948338	37949980	LastExon	+	ZC3H12A	protein_coding	chr1	37949172	37949980	0.352223190932868	0.492082825822168	*	*	*	*	*	0	0	*	*	*	*	*	0	0	chr1-37949965:37950195	chr1	37949965	37950195	chr1	37949965	37949980	chr1-37949896:37952097	chr1	37949896	37952097	chr1
chr1	38093275	38093908	-0.333333333333334	0.137705440315617	0.5	0.842105263157895	0.472765278018163	0.459594497828725	10	0.00787682758938456	HypoHigh	chr1	38082348	38095560	Intron3	-	RSPO1	protein_coding	chr1	38093275	38093908	1	0.0479109900090827	*	*	*	*	*	0	0	*	*	*	*	*	0	0	chr1-38093840:38094495	chr1	38093840	38094495	chr1	38093840	38093908	*	*	*	*	*
chr1	38253567	38259176	0.059027777777778	-0.212527029395257	1	0.916666666666667	0.123744108880292	0.337070117308054	63	4.84943440363599e-05	HypoLow	chr1	38258473	38259473	Promoter	+	MANEAL	protein_coding	chr1	38258473	38259176	0.125334284186129	0.703	CpG: 130	chr1	38259095	38260427	chr1	38259095	38259176	*	*	*	*	*	0	0	chr1-38259060:38259275	chr1	38259060	38259275	chr1	38259060	38259176	chr1-38259010:38259280	chr1	38259010	38259280	chr1
chr1	38510214	38511895	0.310183066361556	-0.038323987218052	0.736111111111111	0.289915966386555	0.503654682481227	0.561135505095409	51	3.29437123691682e-07	HyperHigh	chr1	38509523	38512450	FirstExon	-	POU3F1	protein_coding	chr1	38510214	38511895	1	0.574308165357021	CpG: 312	chr1	38510102	38513642	chr1	38510214	38511895	*	*	*	*	*	0	0	chr1-38511805:38512015	chr1	38511805	38512015	chr1	38511805	38511895	chr1-38511876:38512400	chr1	38511876	38512400	chr1
chr1	38903424	38908725	0.0950046685340806	-0.294905023218385	0.916666666666667	0.792857142857143	0.243550091017914	0.486605433056727	21	0.0343134232114052	HypoLow	*	*	*	InterGenic	*	*	*	*	*	*	*	*	*	*	*	*	*	0	0	*	*	*	*	*	0	0	chr1-38906165:38906315	chr1	38906165	38906315	chr1	38906165	38906315	chr1-38907904:38908314	chr1	38907904	38908314	chr1
chr1	38941619	38942250	0.203947368421053	0.132623264189371	0.357142857142857	0.0909090909090909	0.459594497828725	0.328409378678084	20	0.0109202630172969	HyperHigh	chr1	38941497	38941864	Intron1	+	RP11-329N22.1	lincRNA	chr1	38941619	38941864	0.388272583201268	0.667574931880109	*	*	*	*	*	0	0	*	*	*	*	*	0	0	chr1-38941485:38942130	chr1	38941485	38942130	chr1	38941619	38941864	chr1-38941779:38942647	chr1	38941779	38942647	chr1
chr1	38941619	38942250	0.203947368421053	0.132623264189371	0.357142857142857	0.0909090909090909	0.459594497828725	0.328409378678084	20	0.0109202630172969	HyperHigh	chr1	38941865	38941927	Exon2	+	RP11-329N22.1	lincRNA	chr1	38941865	38941927	0.098256735340729	1	CpG: 42	chr1	38941919	38942404	chr1	38941919	38941927	*	*	*	*	*	0	0	chr1-38941485:38942130	chr1	38941485	38942130	chr1	38941865	38941927	chr1-38941907:38942351	chr1	38941907	38942351	chr1
chr1	38941619	38942250	0.203947368421053	0.132623264189371	0.357142857142857	0.0909090909090909	0.459594497828725	0.328409378678084	20	0.0109202630172969	HyperHigh	chr1	38941928	38942058	Intron2	+	RP11-329N22.1	lincRNA	chr1	38941928	38942058	0.206022187004754	1	CpG: 42	chr1	38941919	38942404	chr1	38941928	38942058	*	*	*	*	*	0	0	chr1-38941485:38942130	chr1	38941485	38942130	chr1	38941928	38942058	chr1-38941943:38942143	chr1	38941943	38942143	chr1
chr1	38941619	38942250	0.203947368421053	0.132623264189371	0.357142857142857	0.0909090909090909	0.459594497828725	0.328409378678084	20	0.0109202630172969	HyperHigh	chr1	38942059	38942156	LastExon	+	RP11-329N22.1	lincRNA	chr1	38942059	38942156	0.153724247226624	1	CpG: 42	chr1	38941919	38942404	chr1	38942059	38942156	*	*	*	*	*	0	0	chr1-38941485:38942130	chr1	38941485	38942130	chr1	38942059	38942130	chr1-38942116:38942526	chr1	38942116	38942526	chr1
chr1	39042980	39044836	0.0666666666666667	0.213239805655213	0.454545454545455	0.25	0.593979021182235	0.353759374819711	30	0.09877932871138	HypoHigh	*	*	*	InterGenic	*	*	*	*	*	*	*	*	CpG: 59	chr1	39044059	39044561	chr1	39044059	39044561	*	*	*	*	*	0	0	chr1-39044805:39045015	chr1	39044805	39045015	chr1	39044805	39044836	chr1-39044824:39044983	chr1	39044824	39044983	chr1
chr1	39808930	39811889	0.0667300535721589	-0.223610803787876	0.957272727272727	0.866071428571428	0.174470462995874	0.39123740373146	39	4.4753327177626e-05	HypoLow	chr1	39806626	39812648	Intron40	+	MACF1	protein_coding	chr1	39808930	39811889	1	0.491364995018266	*	*	*	*	*	0	0	*	*	*	*	*	0	0	chr1-39810525:39810735	chr1	39810525	39810735	chr1	39810525	39810735	chr1-39810566:39810656	chr1	39810566	39810656	chr1
chr1	40104968	40105289	0.403508771929825	-0.013617360990918	0.714285714285714	0.263157894736842	0.597493750120193	0.593557376506962	10	0.0187577128753599	HyperHigh	chr1	40098388	40105217	Intron1	-	HEYL	protein_coding	chr1	40104968	40105217	0.775700934579439	0.0364621467271929	CpG: 78	chr1	40105010	40105707	chr1	40105010	40105217	*	*	*	*	*	0	0	chr1-40105085:40105235	chr1	40105085	40105235	chr1	40105085	40105217	chr1-40105203:40106043	chr1	40105203	40106043	chr1
chr1	40104968	40105289	0.403508771929825	-0.013617360990918	0.714285714285714	0.263157894736842	0.597493750120193	0.593557376506962	10	0.0187577128753599	HyperHigh	chr1	40105218	40105617	FirstExon	-	HEYL	protein_coding	chr1	40105218	40105289	0.221183800623053	0.177944862155388	CpG: 78	chr1	40105010	40105707	chr1	40105218	40105289	*	*	*	*	*	0	0	chr1-40105265:40105855	chr1	40105265	40105855	chr1	40105265	40105289	chr1-40105280:40105856	chr1	40105280	40105856	chr1
chr1	40253730	40254403	0.2	-0.212441230011365	0.896551724137931	0.5	0.492040240383091	0.572305728896233	18	0.0118788333518396	-	chr1	40240711	40253823	Intron1	-	BMP8B	protein_coding	chr1	40253730	40253823	0.138187221396731	0.00709273947528981	CpG: 157	chr1	40253683	40255172	chr1	40253730	40253823	*	*	*	*	*	0	0	chr1-40253765:40254095	chr1	40253765	40254095	chr1	40253765	40253823	chr1-40253766:40254196	chr1	40253766	40254196	chr1
chr1	40253730	40254403	0.2	-0.212441230011365	0.896551724137931	0.5	0.492040240383091	0.572305728896233	18	0.0118788333518396	-	chr1	40253824	40254533	FirstExon	-	BMP8B	protein_coding	chr1	40253824	40254403	0.860326894502229	0.816643159379408	CpG: 157	chr1	40253683	40255172	chr1	40253824	40254403	*	*	*	*	*	0	0	chr1-40254125:40254675	chr1	40254125	40254675	chr1	40254125	40254403	chr1-40254401:40254595	chr1	40254401	40254595	chr1
chr1	40253730	40254403	0.2	-0.212441230011365	0.896551724137931	0.5	0.492040240383091	0.572305728896233	18	0.0118788333518396	-	chr1	40253647	40254647	Promoter	+	RP1-118J21.25	antisense	chr1	40253730	40254403	1	0.673	CpG: 157	chr1	40253683	40255172	chr1	40253730	40254403	*	*	*	*	*	0	0	chr1-40254125:40254675	chr1	40254125	40254675	chr1	40254125	40254403	chr1-40254401:40254595	chr1	40254401	40254595	chr1
chr1	41174258	41176297	0.233333333333333	-0.201756803693773	0.944444444444444	0.666666666666667	0.216674140549451	0.459594497828725	20	5.72024347382453e-06	HyperLow	chr1	41157540	41204507	Intron1	+	NFYC	protein_coding	chr1	41174258	41176297	1	0.0434134605148296	*	*	*	*	*	0	0	*	*	*	*	*	0	0	chr1-41176100:41176590	chr1	41176100	41176590	chr1	41176100	41176297	chr1-41176275:41176645	chr1	41176275	41176645	chr1
chr1	41282310	41284638	0.310357142857143	-0.060528639385473	0.866071428571428	0.427272727272727	0.312121639496576	0.331481842071983	41	0.000215932350173365	HyperHigh	chr1	41250080	41282936	Intron1	+	KCNQ4	protein_coding	chr1	41282310	41282936	0.268900343642612	0.0190528366204042	*	*	*	*	*	0	0	*	*	*	*	*	0	0	chr1-41282765:41283035	chr1	41282765	41283035	chr1	41282765	41282936	*	*	*	*	*
chr1	41282310	41284638	0.310357142857143	-0.060528639385473	0.866071428571428	0.427272727272727	0.312121639496576	0.331481842071983	41	0.000215932350173365	HyperHigh	chr1	41282937	41283027	Exon2	+	KCNQ4	protein_coding	chr1	41282937	41283027	0.038659793814433	1	*	*	*	*	*	0	0	*	*	*	*	*	0	0	chr1-41282765:41283035	chr1	41282765	41283035	chr1	41282937	41283027	*	*	*	*	*
chr1	41282310	41284638	0.310357142857143	-0.060528639385473	0.866071428571428	0.427272727272727	0.312121639496576	0.331481842071983	41	0.000215932350173365	HyperHigh	chr1	41283028	41283835	Intron2	+	KCNQ4	protein_coding	chr1	41283028	41283835	0.346649484536082	1	*	*	*	*	*	0	0	*	*	*	*	*	0	0	chr1-41283785:41284175	chr1	41283785	41284175	chr1	41283785	41283835	chr1-41283828:41284468	chr1	41283828	41284468	chr1
chr1	41282310	41284638	0.310357142857143	-0.060528639385473	0.866071428571428	0.427272727272727	0.312121639496576	0.331481842071983	41	0.000215932350173365	HyperHigh	chr1	41283836	41283962	Exon3	+	KCNQ4	protein_coding	chr1	41283836	41283962	0.0541237113402062	1	CpG: 70	chr1	41283840	41284591	chr1	41283840	41283962	*	*	*	*	*	0	0	chr1-41283785:41284175	chr1	41283785	41284175	chr1	41283836	41283962	chr1-41283956:41284472	chr1	41283956	41284472	chr1
chr1	41282310	41284638	0.310357142857143	-0.060528639385473	0.866071428571428	0.427272727272727	0.312121639496576	0.331481842071983	41	0.000215932350173365	HyperHigh	chr1	41283963	41284176	Intron3	+	KCNQ4	protein_coding	chr1	41283963	41284176	0.0914948453608247	1	CpG: 70	chr1	41283840	41284591	chr1	41283963	41284176	*	*	*	*	*	0	0	chr1-41283785:41284175	chr1	41283785	41284175	chr1	41283963	41284175	chr1-41284164:41284414	chr1	41284164	41284414	chr1
chr1	41282310	41284638	0.310357142857143	-0.060528639385473	0.866071428571428	0.427272727272727	0.312121639496576	0.331481842071983	41	0.000215932350173365	HyperHigh	chr1	41284177	41284352	Exon4	+	KCNQ4	protein_coding	chr1	41284177	41284352	0.0751718213058419	1	CpG: 70	chr1	41283840	41284591	chr1	41284177	41284352	*	*	*	*	*	0	0	chr1-41284185:41284635	chr1	41284185	41284635	chr1	41284185	41284352	chr1-41284208:41284648	chr1	41284208	41284648	chr1
chr1	41282310	41284638	0.310357142857143	-0.060528639385473	0.866071428571428	0.427272727272727	0.312121639496576	0.331481842071983	41	0.000215932350173365	HyperHigh	chr1	41284353	41285018	Intron4	+	KCNQ4	protein_coding	chr1	41284353	41284638	0.122422680412371	0.428571428571429	CpG: 70	chr1	41283840	41284591	chr1	41284353	41284591	*	*	*	*	*	0	0	chr1-41284185:41284635	chr1	41284185	41284635	chr1	41284353	41284635	chr1-41284208:41284648	chr1	41284208	41284648	chr1
chr1	41349665	41350110	0.486011904761905	-0.160432513813264	0.893557422969188	0.373015873015873	0.4389095783293	0.598868822840651	19	1.38995496465819e-06	HyperLow	*	*	*	InterGenic	*	*	*	*	*	*	*	*	CpG: 67	chr1	41349740	41350293	chr1	41349740	41350110	*	*	*	*	*	0	0	chr1-41349745:41350375	chr1	41349745	41350375	chr1	41349745	41350110	chr1-41349809:41350121	chr1	41349809	41350121	chr1
chr1	41906116	41913289	0.059048560135517	-0.249268745191564	1	0.888888888888889	0	0.351648818429142	51	4.35808367551999e-05	HypoLow	*	*	*	InterGenic	*	*	*	*	*	*	*	*	*	*	*	*	*	0	0	*	*	*	*	*	0	0	chr1-41912640:41913195	chr1	41912640	41913195	chr1	41912640	41913195	chr1-41912881:41913137	chr1	41912881	41913137	chr1
chr1	41974550	41976235	0.240651260504202	-0.0866374051020065	0.811011904761905	0.427083333333333	0.497579216204555	0.517815099268087	21	0.00361981141702027	HyperHigh	chr1	41972036	41976934	LastExon	-	HIVEP3	protein_coding	chr1	41974550	41976235	1	0.344017966516946	*	*	*	*	*	0	0	*	*	*	*	*	0	0	chr1-41975980:41976215	chr1	41975980	41976215	chr1	41975980	41976215	chr1-41975915:41976199	chr1	41975915	41976199	chr1
chr1	42272302	42272961	-0.303571428571428	0	0.240384615384616	0.569444444444445	0.5	0.484273177038261	13	0.00321487444872728	HypoHigh	chr1	42094619	42384083	Intron1	-	HIVEP3	protein_coding	chr1	42272302	42272961	1	0.00227662161788685	*	*	*	*	*	0	0	chr1:42272535-42272820	chr1	42272535	42272820	chr1	42272535	42272820	chr1-42272520:42272815	chr1	42272520	42272815	chr1	42272520	42272815	chr1-42272656:42272892	chr1	42272656	42272892	chr1
chr1	42929239	42929470	0.373333333333333	0.104487087255943	0.5	0.105263157894737	0.598930543993879	0.479751339070625	10	0.000762891193228747	HyperHigh	*	*	*	InterGenic	*	*	*	*	*	*	*	*	CpG: 56	chr1	42928797	42929500	chr1	42929239	42929470	*	*	*	*	*	0	0	chr1-42929060:42929555	chr1	42929060	42929555	chr1	42929239	42929470	chr1-42928976:42929684	chr1	42928976	42929684	chr1
chr1	43769001	43770606	0.142857142857143	-0.212293143811123	0.933333333333333	0.733333333333333	0.240642698295787	0.5	24	0.00334362183262328	HypoLow	chr1	43766801	43770521	Intron1	+	TIE1	protein_coding	chr1	43769001	43770521	0.947040498442368	0.408602150537634	*	*	*	*	*	0	0	*	*	*	*	*	0	0	chr1-43769925:43770335	chr1	43769925	43770335	chr1	43769925	43770335	chr1-43770518:43770998	chr1	43770518	43770998	chr1
chr1	43769001	43770606	0.142857142857143	-0.212293143811123	0.933333333333333	0.733333333333333	0.240642698295787	0.5	24	0.00334362183262328	HypoLow	chr1	43770522	43770836	Exon2	+	TIE1	protein_coding	chr1	43770522	43770606	0.0523364485981308	0.267515923566879	CpG: 43	chr1	43770522	43770880	chr1	43770522	43770606	*	*	*	*	*	0	0	chr1-43770605:43770830	chr1	43770605	43770830	chr1	43770605	43770606	chr1-43770595:43770975	chr1	43770595	43770975	chr1
chr1	43814588	43815322	0.218560606060606	-0.216719802456209	0.85	0.629166666666666	0.288328675413353	0.490880208195335	25	3.11796044835226e-07	HyperLow	chr1	43814514	43814673	Exon9	+	MPL	protein_coding	chr1	43814588	43814673	0.115803814713896	0.534591194968553	CpG: 76	chr1	43814305	43815277	chr1	43814588	43814673	*	*	*	*	*	0	0	chr1-43814485:43815315	chr1	43814485	43815315	chr1	43814588	43814673	chr1-43814659:43815335	chr1	43814659	43815335	chr1
chr1	43814588	43815322	0.218560606060606	-0.216719802456209	0.85	0.629166666666666	0.288328675413353	0.490880208195335	25	3.11796044835226e-07	HyperLow	chr1	43814674	43814933	Intron9	+	MPL	protein_coding	chr1	43814674	43814933	0.352861035422343	1	CpG: 76	chr1	43814305	43815277	chr1	43814674	43814933	*	*	*	*	*	0	0	chr1-43814485:43815315	chr1	43814485	43815315	chr1	43814674	43814933	chr1-43814926:43815326	chr1	43814926	43815326	chr1
chr1	43814588	43815322	0.218560606060606	-0.216719802456209	0.85	0.629166666666666	0.288328675413353	0.490880208195335	25	3.11796044835226e-07	HyperLow	chr1	43814934	43815030	Exon10	+	MPL	protein_coding	chr1	43814934	43815030	0.130790190735695	1	CpG: 76	chr1	43814305	43815277	chr1	43814934	43815030	*	*	*	*	*	0	0	chr1-43814485:43815315	chr1	43814485	43815315	chr1	43814934	43815030	chr1-43815029:43815576	chr1	43815029	43815576	chr1
chr1	43814588	43815322	0.218560606060606	-0.216719802456209	0.85	0.629166666666666	0.288328675413353	0.490880208195335	25	3.11796044835226e-07	HyperLow	chr1	43815031	43817886	Intron10	+	MPL	protein_coding	chr1	43815031	43815322	0.396457765667575	0.101926444833625	CpG: 76	chr1	43814305	43815277	chr1	43815031	43815277	*	*	*	*	*	0	0	chr1-43814485:43815315	chr1	43814485	43815315	chr1	43815031	43815315	chr1-43815222:43815442	chr1	43815222	43815442	chr1
chr1	44398885	44399854	0.190746753246753	0.21892503800564	0.291666666666667	0.101010101010101	0.514160416786859	0.307309364962454	33	6.00650247996255e-05	HypoHigh	chr1	44397991	44398991	Promoter	+	ARTN	protein_coding	chr1	44398885	44398991	0.109391124871001	0.106	*	*	*	*	*	0	0	*	*	*	*	*	0	0	chr1-44398505:44400150	chr1	44398505	44400150	chr1	44398885	44398991	chr1-44398962:44399666	chr1	44398962	44399666	chr1
chr1	44398885	44399854	0.190746753246753	0.21892503800564	0.291666666666667	0.101010101010101	0.514160416786859	0.307309364962454	33	6.00650247996255e-05	HypoHigh	chr1	44398992	44399557	FirstExon	+	ARTN	protein_coding	chr1	44398992	44399557	0.583075335397317	1	CpG: 35	chr1	44399068	44399535	chr1	44399068	44399535	*	*	*	*	*	0	0	chr1-44398505:44400150	chr1	44398505	44400150	chr1	44398992	44399557	chr1-44399466:44399996	chr1	44399466	44399996	chr1
chr1	44398885	44399854	0.190746753246753	0.21892503800564	0.291666666666667	0.101010101010101	0.514160416786859	0.307309364962454	33	6.00650247996255e-05	HypoHigh	chr1	44399558	44399783	Intron1	+	ARTN	protein_coding	chr1	44399558	44399783	0.232198142414861	1	*	*	*	*	*	0	0	*	*	*	*	*	0	0	chr1-44398505:44400150	chr1	44398505	44400150	chr1	44399558	44399783	chr1-44399777:44400488	chr1	44399777	44400488	chr1
chr1	44398885	44399854	0.190746753246753	0.21892503800564	0.291666666666667	0.101010101010101	0.514160416786859	0.307309364962454	33	6.00650247996255e-05	HypoHigh	chr1	44399784	44399932	Exon2	+	ARTN	protein_coding	chr1	44399784	44399854	0.0722394220846233	0.472972972972973	*	*	*	*	*	0	0	*	*	*	*	*	0	0	chr1-44398505:44400150	chr1	44398505	44400150	chr1	44399784	44399854	chr1-44399852:44400276	chr1	44399852	44400276	chr1
chr1	44497392	44506766	0.093452380952381	-0.225174855163927	1	0.836021505376344	0.216674140549451	0.405318865840901	75	1.01144806481712e-06	HypoLow	chr1	44497033	44498033	Promoter	-	SLC6A9	protein_coding	chr1	44497392	44498033	0.0683806272669085	0.641	*	*	*	*	*	0	0	*	*	*	*	*	0	0	chr1-44497840:44498430	chr1	44497840	44498430	chr1	44497840	44498033	chr1-44497959:44498876	chr1	44497959	44498876	chr1
chr1	44573022	44593703	0.0588235294117651	-0.204789815295586	1	0.894736842105263	0.15633186452976	0.331130909670121	194	1.68653957498454e-13	HypoLow	chr1	44583521	44584521	Promoter	+	KLF17	protein_coding	chr1	44583521	44584521	0.0483535612397853	1	*	*	*	*	*	0	0	*	*	*	*	*	0	0	chr1-44583865:44584715	chr1	44583865	44584715	chr1	44583865	44584521	chr1-44583750:44584154	chr1	44583750	44584154	chr1
chr1	44573022	44593703	0.0588235294117651	-0.204789815295586	1	0.894736842105263	0.15633186452976	0.331130909670121	194	1.68653957498454e-13	HypoLow	chr1	44584522	44584660	FirstExon	+	KLF17	protein_coding	chr1	44584522	44584660	0.00667279145109037	1	*	*	*	*	*	0	0	*	*	*	*	*	0	0	chr1-44583865:44584715	chr1	44583865	44584715	chr1	44584522	44584660	*	*	*	*	*
chr1	44573022	44593703	0.0588235294117651	-0.204789815295586	1	0.894736842105263	0.15633186452976	0.331130909670121	194	1.68653957498454e-13	HypoLow	chr1	44584661	44595024	Intron1	+	KLF17	protein_coding	chr1	44584661	44593703	0.437212900730139	0.872527260445817	*	*	*	*	*	0	0	*	*	*	*	*	0	0	chr1-44593625:44593855	chr1	44593625	44593855	chr1	44593625	44593703	chr1-44593698:44593974	chr1	44593698	44593974	chr1
chr1	44628951	44631486	0.123376623376623	-0.249456944204059	0.9375	0.842105263157895	0.216674140549451	0.459594497828725	20	0.00634163181515368	HypoLow	*	*	*	InterGenic	*	*	*	*	*	*	*	*	*	*	*	*	*	0	0	*	*	*	*	*	0	0	*	*	*	*	*	0	0	chr1-44630258:44630523	chr1	44630258	44630523	chr1
chr1	44715444	44718003	0.068589743589744	-0.228658419422619	1	0.898989898989899	0	0.314874404751527	43	0.00539660683937725	HypoLow	chr1	44713711	44750506	Intron7	-	ERI3	protein_coding	chr1	44715444	44718003	1	0.0695474928658785	*	*	*	*	*	0	0	*	*	*	*	*	0	0	chr1-44717885:44718135	chr1	44717885	44718135	chr1	44717885	44718003	chr1-44717802:44718406	chr1	44717802	44718406	chr1
chr1	45102934	45106146	0.059027777777778	-0.242743002721138	1	0.930288461538461	0	0.280424284295374	43	1.1956521049807e-06	HypoLow	chr1	45101835	45110369	Intron8	+	RNF220	protein_coding	chr1	45102934	45106146	1	0.376376845558941	*	*	*	*	*	0	0	*	*	*	*	*	0	0	chr1-45105805:45106215	chr1	45105805	45106215	chr1	45105805	45106146	chr1-45106090:45106589	chr1	45106090	45106589	chr1
chr1	45102934	45106146	0.059027777777778	-0.242743002721138	1	0.930288461538461	0	0.280424284295374	43	1.1956521049807e-06	HypoLow	chr1	45102130	45111031	Intron2	-	TMEM53	protein_coding	chr1	45102934	45106146	1	0.36085833052466	*	*	*	*	*	0	0	*	*	*	*	*	0	0	chr1-45105805:45106215	chr1	45105805	45106215	chr1	45105805	45106146	chr1-45106090:45106589	chr1	45106090	45106589	chr1
chr1	45188724	45190043	-0.125	-0.222222222222222	0.0666666666666667	0.157894736842105	0.257742782841639	0.520426041486377	26	0.0222517401213891	HypoLow	chr1	45169846	45189793	Intron7	+	C1orf228	protein_coding	chr1	45188724	45189793	0.810462471569371	0.0535920188499524	CpG: 79	chr1	45189705	45190558	chr1	45189705	45189793	*	*	*	*	*	0	0	chr1-45189585:45190335	chr1	45189585	45190335	chr1	45189585	45189793	chr1-45189702:45190098	chr1	45189702	45190098	chr1
chr1	45188724	45190043	-0.125	-0.222222222222222	0.0666666666666667	0.157894736842105	0.257742782841639	0.520426041486377	26	0.0222517401213891	HypoLow	chr1	45189794	45189916	Exon8	+	C1orf228	protein_coding	chr1	45189794	45189916	0.0924943138741471	1	CpG: 79	chr1	45189705	45190558	chr1	45189794	45189916	*	*	*	*	*	0	0	chr1-45189585:45190335	chr1	45189585	45190335	chr1	45189794	45189916	chr1-45189702:45190098	chr1	45189702	45190098	chr1
chr1	45188724	45190043	-0.125	-0.222222222222222	0.0666666666666667	0.157894736842105	0.257742782841639	0.520426041486377	26	0.0222517401213891	HypoLow	chr1	45189917	45189991	Intron8	+	C1orf228	protein_coding	chr1	45189917	45189991	0.0561031084154663	1	CpG: 79	chr1	45189705	45190558	chr1	45189917	45189991	*	*	*	*	*	0	0	chr1-45189585:45190335	chr1	45189585	45190335	chr1	45189917	45189991	chr1-45189702:45190098	chr1	45189702	45190098	chr1
chr1	45188724	45190043	-0.125	-0.222222222222222	0.0666666666666667	0.157894736842105	0.257742782841639	0.520426041486377	26	0.0222517401213891	HypoLow	chr1	45189992	45190064	Exon9	+	C1orf228	protein_coding	chr1	45189992	45190043	0.0386656557998484	0.708333333333333	CpG: 79	chr1	45189705	45190558	chr1	45189992	45190043	*	*	*	*	*	0	0	chr1-45189585:45190335	chr1	45189585	45190335	chr1	45189992	45190043	chr1-45189702:45190098	chr1	45189702	45190098	chr1
chr1	45204081	45204529	0.263157894736843	-0.399394649303933	0.944444444444444	0.631578947368421	0.11778644500714	0.607689327424554	16	3.71182475386288e-05	HyperLow	chr1	45204491	45205491	Promoter	+	KIF2C	protein_coding	chr1	45204491	45204529	0.0848214285714286	0.038	*	*	*	*	*	0	0	*	*	*	*	*	0	0	*	*	*	*	*	0	0	*	*	*	*	*
chr1	45731744	45732794	-0.263636363636364	0.0713373020888289	0.636363636363636	0.833333333333333	0.552580908834963	0.482205555876069	8	0.0213077106716282	HypoHigh	chr1	45553910	45769598	Intron2	-	ZSWIM5	protein_coding	chr1	45731744	45732794	1	0.00486814287303883	*	*	*	*	*	0	0	*	*	*	*	*	0	0	chr1-45731800:45732375	chr1	45731800	45732375	chr1	45731800	45732375	chr1-45732674:45733104	chr1	45732674	45733104	chr1
chr1	46051107	46052729	0.246753246753247	-0.242920357279274	0.857142857142857	0.428571428571429	0.287706856188877	0.554832593066821	20	0.00183174015459565	HyperLow	chr1	46049878	46056894	Intron1	+	NASP	protein_coding	chr1	46051107	46052729	1	0.231185860889396	*	*	*	*	*	0	0	*	*	*	*	*	0	0	chr1-46052565:46052755	chr1	46052565	46052755	chr1	46052565	46052729	chr1-46052209:46052399	chr1	46052209	46052399	chr1
chr1	46669279	46670450	0.39080459770115	-0.011890856621706	0.666666666666667	0.275862068965517	0.432931646898466	0.441670403608059	20	6.42728656971643e-06	HyperHigh	chr1	46663544	46685376	Intron1	-	POMGNT1	protein_coding	chr1	46669279	46670450	1	0.0536368633198974	*	*	*	*	*	0	0	*	*	*	*	*	0	0	chr1-46668560:46670470	chr1	46668560	46670470	chr1	46669279	46670450	chr1-46669958:46670454	chr1	46669958	46670454	chr1
chr1	46669279	46670450	0.39080459770115	-0.011890856621706	0.666666666666667	0.275862068965517	0.432931646898466	0.441670403608059	20	6.42728656971643e-06	HyperHigh	chr1	46669006	46669296	FirstExon	+	LURAP1	protein_coding	chr1	46669279	46669296	0.0145175064047822	0.0586206896551724	*	*	*	*	*	0	0	*	*	*	*	*	0	0	chr1-46668560:46670470	chr1	46668560	46670470	chr1	46669279	46669296	chr1-46669285:46669785	chr1	46669285	46669785	chr1
chr1	46669279	46670450	0.39080459770115	-0.011890856621706	0.666666666666667	0.275862068965517	0.432931646898466	0.441670403608059	20	6.42728656971643e-06	HyperHigh	chr1	46669297	46685370	Intron1	+	LURAP1	protein_coding	chr1	46669297	46670450	0.984628522630231	0.0717352081129845	*	*	*	*	*	0	0	*	*	*	*	*	0	0	chr1-46668560:46670470	chr1	46668560	46670470	chr1	46669297	46670450	chr1-46669958:46670454	chr1	46669958	46670454	chr1
chr1	46739903	46743939	0.066666666666667	-0.218951799532938	1	0.923076923076923	0	0.301862420566087	38	2.06160574997618e-05	HypoLow	chr1	46739889	46740209	Intron15	+	RAD54L	protein_coding	chr1	46739903	46740209	0.0758176412289395	0.95625	*	*	*	*	*	0	0	*	*	*	*	*	0	0	chr1-46739905:46740215	chr1	46739905	46740215	chr1	46739905	46740209	chr1-46740182:46740806	chr1	46740182	46740806	chr1
chr1	46739903	46743939	0.066666666666667	-0.218951799532938	1	0.923076923076923	0	0.301862420566087	38	2.06160574997618e-05	HypoLow	chr1	46740210	46740389	Exon16	+	RAD54L	protein_coding	chr1	46740210	46740389	0.0443508424182359	1	*	*	*	*	*	0	0	*	*	*	*	*	0	0	chr1-46740325:46740715	chr1	46740325	46740715	chr1	46740325	46740389	chr1-46740332:46740905	chr1	46740332	46740905	chr1
chr1	46739903	46743939	0.066666666666667	-0.218951799532938	1	0.923076923076923	0	0.301862420566087	38	2.06160574997618e-05	HypoLow	chr1	46740390	46743488	Intron16	+	RAD54L	protein_coding	chr1	46740390	46743488	0.767591674925669	1	*	*	*	*	*	0	0	*	*	*	*	*	0	0	chr1-46743325:46743475	chr1	46743325	46743475	chr1	46743325	46743475	chr1-46743487:46743867	chr1	46743487	46743867	chr1
chr1	46739903	46743939	0.066666666666667	-0.218951799532938	1	0.923076923076923	0	0.301862420566087	38	2.06160574997618e-05	HypoLow	chr1	46743489	46743652	Exon17	+	RAD54L	protein_coding	chr1	46743489	46743652	0.040386521308226	1	*	*	*	*	*	0	0	*	*	*	*	*	0	0	chr1-46743520:46744055	chr1	46743520	46744055	chr1	46743520	46743652	chr1-46743636:46744240	chr1	46743636	46744240	chr1
chr1	46739903	46743939	0.066666666666667	-0.218951799532938	1	0.923076923076923	0	0.301862420566087	38	2.06160574997618e-05	HypoLow	chr1	46743653	46743743	Intron17	+	RAD54L	protein_coding	chr1	46743653	46743743	0.0222993062438057	1	*	*	*	*	*	0	0	*	*	*	*	*	0	0	chr1-46743520:46744055	chr1	46743520	46744055	chr1	46743653	46743743	chr1-46743636:46744240	chr1	46743636	46744240	chr1
chr1	46739903	46743939	0.066666666666667	-0.218951799532938	1	0.923076923076923	0	0.301862420566087	38	2.06160574997618e-05	HypoLow	chr1	46743744	46744144	LastExon	+	RAD54L	protein_coding	chr1	46743744	46743939	0.0483151635282458	0.4875	*	*	*	*	*	0	0	*	*	*	*	*	0	0	chr1-46743520:46744055	chr1	46743520	46744055	chr1	46743744	46743939	chr1-46743774:46744150	chr1	46743774	46744150	chr1
chr1	46859478	46860361	0.341666666666667	-0.0154708091314635	0.787114845938375	0.424812030075188	0.52040170724103	0.490297020074158	25	0.00348629352032262	HyperHigh	chr1	46858936	46859936	Promoter	+	FAAH	protein_coding	chr1	46859478	46859936	0.518686296715742	0.458	CpG: 71	chr1	46859724	46860291	chr1	46859724	46859936	*	*	*	*	*	0	0	chr1-46859840:46860650	chr1	46859840	46860650	chr1	46859840	46859936	chr1-46859925:46860261	chr1	46859925	46860261	chr1
chr1	46859478	46860361	0.341666666666667	-0.0154708091314635	0.787114845938375	0.424812030075188	0.52040170724103	0.490297020074158	25	0.00348629352032262	HyperHigh	chr1	46859937	46860215	FirstExon	+	FAAH	protein_coding	chr1	46859937	46860215	0.314835787089468	1	CpG: 71	chr1	46859724	46860291	chr1	46859937	46860215	*	*	*	*	*	0	0	chr1-46859840:46860650	chr1	46859840	46860650	chr1	46859937	46860215	chr1-46860194:46860624	chr1	46860194	46860624	chr1
chr1	46859478	46860361	0.341666666666667	-0.0154708091314635	0.787114845938375	0.424812030075188	0.52040170724103	0.490297020074158	25	0.00348629352032262	HyperHigh	chr1	46860216	46867762	Intron1	+	FAAH	protein_coding	chr1	46860216	46860361	0.164212910532276	0.0192154783991519	CpG: 71	chr1	46859724	46860291	chr1	46860216	46860291	*	*	*	*	*	0	0	chr1-46859840:46860650	chr1	46859840	46860650	chr1	46860216	46860361	chr1-46860351:46860660	chr1	46860351	46860660	chr1
chr1	47392828	47399650	0.104511278195488	-0.238165482832424	0.875	0.763888888888889	0.287706856188877	0.559734721516783	53	0.0207755825834408	HypoLow	chr1	47394849	47395982	LastExon	-	CYP4A11	protein_coding	chr1	47394849	47395982	0.166080328349458	1	*	*	*	*	*	0	0	*	*	*	*	*	0	0	*	*	*	*	*	0	0	chr1-47395476:47396263	chr1	47395476	47396263	chr1
chr1	47392828	47399650	0.104511278195488	-0.238165482832424	0.875	0.763888888888889	0.287706856188877	0.559734721516783	53	0.0207755825834408	HypoLow	chr1	47395983	47398432	Intron11	-	CYP4A11	protein_coding	chr1	47395983	47398432	0.358985634711228	1	*	*	*	*	*	0	0	*	*	*	*	*	0	0	chr1-47396805:47397035	chr1	47396805	47397035	chr1	47396805	47397035	chr1-47396903:47397727	chr1	47396903	47397727	chr1
chr1	47392828	47399650	0.104511278195488	-0.238165482832424	0.875	0.763888888888889	0.287706856188877	0.559734721516783	53	0.0207755825834408	HypoLow	chr1	47398433	47398509	Exon11	-	CYP4A11	protein_coding	chr1	47398433	47398509	0.0111404280269716	1	*	*	*	*	*	0	0	*	*	*	*	*	0	0	*	*	*	*	*	0	0	*	*	*	*	*
chr1	47392828	47399650	0.104511278195488	-0.238165482832424	0.875	0.763888888888889	0.287706856188877	0.559734721516783	53	0.0207755825834408	HypoLow	chr1	47398510	47398654	Intron10	-	CYP4A11	protein_coding	chr1	47398510	47398654	0.0211081794195251	1	*	*	*	*	*	0	0	*	*	*	*	*	0	0	*	*	*	*	*	0	0	*	*	*	*	*
chr1	47392828	47399650	0.104511278195488	-0.238165482832424	0.875	0.763888888888889	0.287706856188877	0.559734721516783	53	0.0207755825834408	HypoLow	chr1	47398655	47398719	Exon10	-	CYP4A11	protein_coding	chr1	47398655	47398719	0.00938141307534447	1	*	*	*	*	*	0	0	*	*	*	*	*	0	0	*	*	*	*	*	0	0	*	*	*	*	*
chr1	47392828	47399650	0.104511278195488	-0.238165482832424	0.875	0.763888888888889	0.287706856188877	0.559734721516783	53	0.0207755825834408	HypoLow	chr1	47398720	47399617	Intron9	-	CYP4A11	protein_coding	chr1	47398720	47399617	0.131486367634125	1	*	*	*	*	*	0	0	*	*	*	*	*	0	0	chr1-47399285:47399475	chr1	47399285	47399475	chr1	47399285	47399475	chr1-47399305:47399815	chr1	47399305	47399815	chr1
chr1	47392828	47399650	0.104511278195488	-0.238165482832424	0.875	0.763888888888889	0.287706856188877	0.559734721516783	53	0.0207755825834408	HypoLow	chr1	47399618	47399751	Exon9	-	CYP4A11	protein_coding	chr1	47399618	47399650	0.00469070653767224	0.240601503759398	*	*	*	*	*	0	0	*	*	*	*	*	0	0	chr1-47399645:47399935	chr1	47399645	47399935	chr1	47399645	47399650	chr1-47399305:47399815	chr1	47399305	47399815	chr1
chr1	47489294	47490973	0.229166666666667	0.052599815172064	0.5	0.235294117647059	0.450548038384464	0.450676700585984	30	0.030919476481743	HyperHigh	chr1	47489240	47489666	FirstExon	+	CYP4X1	protein_coding	chr1	47489294	47489666	0.221560452650387	0.873239436619718	CpG: 40	chr1	47489226	47489633	chr1	47489294	47489633	*	*	*	*	*	0	0	chr1-47488920:47489990	chr1	47488920	47489990	chr1	47489294	47489666	chr1-47489645:47489929	chr1	47489645	47489929	chr1
chr1	47489294	47490973	0.229166666666667	0.052599815172064	0.5	0.235294117647059	0.450548038384464	0.450676700585984	30	0.030919476481743	HyperHigh	chr1	47489667	47495661	Intron1	+	CYP4X1	protein_coding	chr1	47489667	47490973	0.777843954734961	0.217884551217885	*	*	*	*	*	0	0	*	*	*	*	*	0	0	chr1-47490820:47491175	chr1	47490820	47491175	chr1	47490820	47490973	chr1-47489645:47489929	chr1	47489645	47489929	chr1
chr1	47908631	47911258	0.236111111111111	-0.089610591871579	0.818181818181818	0.476190476190476	0.5	0.501840463501648	68	8.10596002770822e-05	HyperHigh	*	*	*	InterGenic	*	*	*	*	*	*	*	*	CpG: 110	chr1	47909712	47911020	chr1	47909712	47911020	chr1:47910443-47910471	chr1	47910443	47910471	chr1	47910443	47910471	chr1-47909945:47910895	chr1	47909945	47910895	chr1	47909945	47910895	chr1-47910988:47911529	chr1	47910988	47911529	chr1
chr1	48182168	48187808	-0.0625	0.236403206681613	0.866071428571428	1	0.425070684680537	0.15633186452976	35	0.0134674350430886	HypoHigh	*	*	*	InterGenic	*	*	*	*	*	*	*	*	*	*	*	*	*	0	0	*	*	*	*	*	0	0	chr1-48187465:48187755	chr1	48187465	48187755	chr1	48187465	48187755	chr1-48187325:48187701	chr1	48187325	48187701	chr1
chr1	48449363	48450387	0.10608660130719	0.207676930630314	0.485294117647059	0.291666666666667	0.588054725621902	0.374208562181927	25	0.0760053079589152	HypoHigh	chr1	48267292	48459705	Intron2	-	TRABD2B	protein_coding	chr1	48449363	48450387	1	0.00532188573537131	CpG: 36	chr1	48449870	48450144	chr1	48449870	48450144	*	*	*	*	*	0	0	chr1-48449805:48450275	chr1	48449805	48450275	chr1	48449805	48450275	chr1-48449976:48450216	chr1	48449976	48450216	chr1
chr1	49095822	49105155	0.1	-0.233339739518578	1	0.842105263157895	0.216674140549451	0.482205555876069	46	0.00015428804878843	HypoLow	chr1	49056658	49100164	Intron9	-	AGBL4	protein_coding	chr1	49095822	49100164	0.465230901103611	0.099802326115938	*	*	*	*	*	0	0	*	*	*	*	*	0	0	chr1-49099105:49099255	chr1	49099105	49099255	chr1	49099105	49099255	*	*	*	*	*
chr1	49095822	49105155	0.1	-0.233339739518578	1	0.842105263157895	0.216674140549451	0.482205555876069	46	0.00015428804878843	HypoLow	chr1	49100165	49100276	Exon9	-	AGBL4	protein_coding	chr1	49100165	49100276	0.0118932819029251	1	*	*	*	*	*	0	0	*	*	*	*	*	0	0	*	*	*	*	*	0	0	chr1-49100175:49100651	chr1	49100175	49100651	chr1
chr1	49095822	49105155	0.1	-0.233339739518578	1	0.842105263157895	0.216674140549451	0.482205555876069	46	0.00015428804878843	HypoLow	chr1	49100277	49119008	Intron8	-	AGBL4	protein_coding	chr1	49100277	49105155	0.522661523625844	0.260423896214831	*	*	*	*	*	0	0	*	*	*	*	*	0	0	chr1-49102360:49102510	chr1	49102360	49102510	chr1	49102360	49102510	chr1-49100175:49100651	chr1	49100175	49100651	chr1
chr1	50489239	50490255	0.236111111111111	0.27828055173361	0.474074074074074	0.15	0.687062083140387	0.326745098593226	29	0.000589518740216732	HyperHigh	chr1	50317191	50489434	Intron1	-	AGBL4	protein_coding	chr1	50489239	50489434	0.191929133858268	0.00113212147953763	CpG: 40	chr1	50489417	50489846	chr1	50489417	50489434	*	*	*	*	*	0	0	chr1-50489420:50489815	chr1	50489420	50489815	chr1	50489420	50489434	chr1-50489421:50489771	chr1	50489421	50489771	chr1
chr1	50489239	50490255	0.236111111111111	0.27828055173361	0.474074074074074	0.15	0.687062083140387	0.326745098593226	29	0.000589518740216732	HyperHigh	chr1	50489435	50489585	FirstExon	-	AGBL4	protein_coding	chr1	50489435	50489585	0.147637795275591	1	CpG: 40	chr1	50489417	50489846	chr1	50489435	50489585	*	*	*	*	*	0	0	chr1-50489420:50489815	chr1	50489420	50489815	chr1	50489435	50489585	chr1-50489541:50489661	chr1	50489541	50489661	chr1
chr1	50489239	50490255	0.236111111111111	0.27828055173361	0.474074074074074	0.15	0.687062083140387	0.326745098593226	29	0.000589518740216732	HyperHigh	chr1	50489586	50490586	Promoter	-	AGBL4	protein_coding	chr1	50489586	50490255	0.658464566929134	0.669	CpG: 40	chr1	50489417	50489846	chr1	50489586	50489846	*	*	*	*	*	0	0	chr1-50489420:50489815	chr1	50489420	50489815	chr1	50489586	50489815	chr1-50489609:50489849	chr1	50489609	50489849	chr1
chr1	50513241	50514286	0.215909090909091	0.107821474888616	0.522727272727272	0.225	0.585939500857616	0.465704771070095	29	0.0173296430383312	HyperHigh	*	*	*	InterGenic	*	*	*	*	*	*	*	*	CpG: 71	chr1	50513644	50514320	chr1	50513644	50514286	*	*	*	*	*	0	0	chr1-50514140:50514290	chr1	50514140	50514290	chr1	50514140	50514286	chr1-50514141:50514381	chr1	50514141	50514381	chr1
chr1	50813479	50814219	-0.174394319131161	-0.225606873948916	0.08125	0.494230769230769	0.255534369891082	0.468465338696773	13	0.0680594645711152	HypoLow	*	*	*	InterGenic	*	*	*	*	*	*	*	*	*	*	*	*	*	0	0	*	*	*	*	*	0	0	chr1-50813740:50813890	chr1	50813740	50813890	chr1	50813740	50813890	chr1-50814213:50814840	chr1	50814213	50814840	chr1
chr1	50885145	50885672	-0.0779352226720649	-0.216312957262252	0.325	0.316666666666666	0.417209722462608	0.657607713568409	11	0.790798282895637	HypoLow	chr1	50883222	50885406	LastExon	-	DMRTA2	protein_coding	chr1	50885145	50885406	0.495256166982922	0.119505494505495	CpG: 480	chr1	50884228	50891471	chr1	50885145	50885406	*	*	*	*	*	0	0	chr1-50883845:50885555	chr1	50883845	50885555	chr1	50885145	50885406	chr1-50885043:50885283	chr1	50885043	50885283	chr1
chr1	50885145	50885672	-0.0779352226720649	-0.216312957262252	0.325	0.316666666666666	0.417209722462608	0.657607713568409	11	0.790798282895637	HypoLow	chr1	50885407	50886649	Intron2	-	DMRTA2	protein_coding	chr1	50885407	50885672	0.502846299810247	0.213365539452496	CpG: 480	chr1	50884228	50891471	chr1	50885407	50885672	*	*	*	*	*	0	0	chr1-50885605:50886575	chr1	50885605	50886575	chr1	50885605	50885672	chr1-50884951:50885898	chr1	50884951	50885898	chr1
chr1	50885724	50889587	0.266666666666667	-0.103066677565937	0.666666666666667	0.25	0.333333333333333	0.459594497828725	78	2.17248624889886e-07	HyperLow	chr1	50885407	50886649	Intron2	-	DMRTA2	protein_coding	chr1	50885724	50886649	0.239451203727673	0.744766505636071	CpG: 480	chr1	50884228	50891471	chr1	50885724	50886649	*	*	*	*	*	0	0	chr1-50886585:50887015	chr1	50886585	50887015	chr1	50886585	50886649	chr1-50886619:50887422	chr1	50886619	50887422	chr1
chr1	50885724	50889587	0.266666666666667	-0.103066677565937	0.666666666666667	0.25	0.333333333333333	0.459594497828725	78	2.17248624889886e-07	HyperLow	chr1	50886650	50887216	Exon2	-	DMRTA2	protein_coding	chr1	50886650	50887216	0.146518250064717	1	CpG: 480	chr1	50884228	50891471	chr1	50886650	50887216	*	*	*	*	*	0	0	chr1-50887105:50887755	chr1	50887105	50887755	chr1	50887105	50887216	chr1-50886753:50887078	chr1	50886753	50887078	chr1
chr1	50885724	50889587	0.266666666666667	-0.103066677565937	0.666666666666667	0.25	0.333333333333333	0.459594497828725	78	2.17248624889886e-07	HyperLow	chr1	50887217	50888787	Intron1	-	DMRTA2	protein_coding	chr1	50887217	50888787	0.406419880921564	1	CpG: 480	chr1	50884228	50891471	chr1	50887217	50888787	*	*	*	*	*	0	0	chr1-50887765:50888915	chr1	50887765	50888915	chr1	50887765	50888787	chr1-50888540:50889462	chr1	50888540	50889462	chr1
chr1	50885724	50889587	0.266666666666667	-0.103066677565937	0.666666666666667	0.25	0.333333333333333	0.459594497828725	78	2.17248624889886e-07	HyperLow	chr1	50888788	50889172	FirstExon	-	DMRTA2	protein_coding	chr1	50888788	50889172	0.0994046078177582	1	CpG: 480	chr1	50884228	50891471	chr1	50888788	50889172	*	*	*	*	*	0	0	chr1-50889020:50890435	chr1	50889020	50890435	chr1	50889020	50889172	chr1-50889136:50889636	chr1	50889136	50889636	chr1
chr1	50885724	50889587	0.266666666666667	-0.103066677565937	0.666666666666667	0.25	0.333333333333333	0.459594497828725	78	2.17248624889886e-07	HyperLow	chr1	50889173	50890173	Promoter	-	DMRTA2	protein_coding	chr1	50889173	50889587	0.107170592803521	0.414	CpG: 480	chr1	50884228	50891471	chr1	50889173	50889587	*	*	*	*	*	0	0	chr1-50889020:50890435	chr1	50889020	50890435	chr1	50889173	50889587	chr1-50889136:50889636	chr1	50889136	50889636	chr1
chr1	52364753	52377683	0.095238095238095	-0.216340833189103	1	0.85	0.197224259527442	0.417209722462608	82	2.77917195077149e-08	HypoLow	chr1	52373628	52385786	LastExon	-	RAB3B	protein_coding	chr1	52373628	52377683	0.313611755607115	0.333525250863629	*	*	*	*	*	0	0	*	*	*	*	*	0	0	chr1-52376685:52376975	chr1	52376685	52376975	chr1	52376685	52376975	chr1-52377223:52377463	chr1	52377223	52377463	chr1
chr1	52817498	52819579	0.172727272727273	-0.306098611351497	1	0.777777777777778	0.216674140549451	0.5	16	0.00175547449590921	HypoLow	chr1	52816269	52819319	LastExon	-	CC2D1B	protein_coding	chr1	52817498	52819319	0.875060067275348	0.597049180327869	*	*	*	*	*	0	0	*	*	*	*	*	0	0	chr1-52819165:52819455	chr1	52819165	52819455	chr1	52819165	52819319	chr1-52818171:52820690	chr1	52818171	52820690	chr1
chr1	52817498	52819579	0.172727272727273	-0.306098611351497	1	0.777777777777778	0.216674140549451	0.5	16	0.00175547449590921	HypoLow	chr1	52819320	52820279	Intron23	-	CC2D1B	protein_coding	chr1	52819320	52819579	0.124459394521864	0.27007299270073	*	*	*	*	*	0	0	*	*	*	*	*	0	0	chr1-52819165:52819455	chr1	52819165	52819455	chr1	52819320	52819455	chr1-52818171:52820690	chr1	52818171	52820690	chr1
chr1	52817498	52819579	0.172727272727273	-0.306098611351497	1	0.777777777777778	0.216674140549451	0.5	16	0.00175547449590921	HypoLow	chr1	52818158	52819158	Promoter	+	RP11-155O18.6	antisense	chr1	52818158	52819158	0.480538202787122	1	*	*	*	*	*	0	0	*	*	*	*	*	0	0	chr1-52818925:52819075	chr1	52818925	52819075	chr1	52818925	52819075	chr1-52818171:52820690	chr1	52818171	52820690	chr1
chr1	52817498	52819579	0.172727272727273	-0.306098611351497	1	0.777777777777778	0.216674140549451	0.5	16	0.00175547449590921	HypoLow	chr1	52819159	52819549	FirstExon	+	RP11-155O18.6	antisense	chr1	52819159	52819549	0.187409899086977	1	*	*	*	*	*	0	0	*	*	*	*	*	0	0	chr1-52819165:52819455	chr1	52819165	52819455	chr1	52819165	52819455	chr1-52818171:52820690	chr1	52818171	52820690	chr1
chr1	53017390	53017780	0.4	0.226819651411726	0.473684210526316	0.1	0.554832593066821	0.382944951426972	10	0.0170039418550136	HyperHigh	chr1	52992046	53018602	Intron1	-	ZCCHC11	protein_coding	chr1	53017390	53017780	1	0.0146859466787167	*	*	*	*	*	0	0	*	*	*	*	*	0	0	chr1-53017185:53018135	chr1	53017185	53018135	chr1	53017390	53017780	chr1-53017776:53018206	chr1	53017776	53018206	chr1
chr1	53308173	53309603	0.230627828054298	-0.0691092388684465	0.618181818181818	0.279220779220779	0.492038771087418	0.520926725953373	49	1.46348329153968e-05	HyperHigh	chr1	53307182	53308182	Promoter	+	ZYG11A	protein_coding	chr1	53308173	53308182	0.00629370629370629	0.009	*	*	*	*	*	0	0	*	*	*	*	*	0	0	*	*	*	*	*	0	0	chr1-53308179:53309193	chr1	53308179	53309193	chr1
chr1	53308173	53309603	0.230627828054298	-0.0691092388684465	0.618181818181818	0.279220779220779	0.492038771087418	0.520926725953373	49	1.46348329153968e-05	HyperHigh	chr1	53308183	53308645	FirstExon	+	ZYG11A	protein_coding	chr1	53308183	53308645	0.323076923076923	1	CpG: 112	chr1	53308294	53309262	chr1	53308294	53308645	*	*	*	*	*	0	0	chr1-53308205:53308575	chr1	53308205	53308575	chr1	53308205	53308575	chr1-53308641:53309336	chr1	53308641	53309336	chr1
chr1	53308173	53309603	0.230627828054298	-0.0691092388684465	0.618181818181818	0.279220779220779	0.492038771087418	0.520926725953373	49	1.46348329153968e-05	HyperHigh	chr1	53308646	53320136	Intron1	+	ZYG11A	protein_coding	chr1	53308646	53309603	0.669230769230769	0.083289817232376	CpG: 112	chr1	53308294	53309262	chr1	53308646	53309262	*	*	*	*	*	0	0	chr1-53309520:53309995	chr1	53309520	53309995	chr1	53309520	53309603	chr1-53309586:53310030	chr1	53309586	53310030	chr1
chr1	53527198	53528270	0.111111111111111	0.207804340928558	0.225	0.0513157894736842	0.437096626973749	0.185910656829658	37	0.00390102631441263	HypoHigh	chr1	53526853	53527853	Promoter	+	PODN	protein_coding	chr1	53527198	53527853	0.611007462686567	0.655	CpG: 117	chr1	53527572	53528974	chr1	53527572	53527853	*	*	*	*	*	0	0	chr1-53526945:53528475	chr1	53526945	53528475	chr1	53527198	53527853	chr1-53527796:53528292	chr1	53527796	53528292	chr1
chr1	53527198	53528270	0.111111111111111	0.207804340928558	0.225	0.0513157894736842	0.437096626973749	0.185910656829658	37	0.00390102631441263	HypoHigh	chr1	53527854	53527980	FirstExon	+	PODN	protein_coding	chr1	53527854	53527980	0.117537313432836	1	CpG: 117	chr1	53527572	53528974	chr1	53527854	53527980	*	*	*	*	*	0	0	chr1-53526945:53528475	chr1	53526945	53528475	chr1	53527854	53527980	chr1-53527796:53528292	chr1	53527796	53528292	chr1
chr1	53527198	53528270	0.111111111111111	0.207804340928558	0.225	0.0513157894736842	0.437096626973749	0.185910656829658	37	0.00390102631441263	HypoHigh	chr1	53527981	53529041	Intron1	+	PODN	protein_coding	chr1	53527981	53528270	0.269589552238806	0.272641509433962	CpG: 117	chr1	53527572	53528974	chr1	53527981	53528270	*	*	*	*	*	0	0	chr1-53526945:53528475	chr1	53526945	53528475	chr1	53527981	53528270	chr1-53528010:53528962	chr1	53528010	53528962	chr1
chr1	53781734	53783143	0.261904761904762	-0.0210114686112649	0.75	0.411764705882353	0.468546354076522	0.45698353148489	16	0.0100883801177743	HyperHigh	chr1	53755362	53792544	Intron2	-	LRP8	protein_coding	chr1	53781734	53783143	1	0.0378946802216126	*	*	*	*	*	0	0	*	*	*	*	*	0	0	chr1-53782465:53783115	chr1	53782465	53783115	chr1	53782465	53783115	chr1-53782769:53783295	chr1	53782769	53783295	chr1
chr1	54163377	54164315	0.25	0.249448029232988	0.454545454545455	0.107142857142857	0.58698801581456	0.306098611351497	16	0.0248928430533414	HyperHigh	chr1	54065952	54199576	Intron1	-	GLIS1	protein_coding	chr1	54163377	54164315	1	0.00701969706040831	*	*	*	*	*	0	0	chr1:54163740-54163856	chr1	54163740	54163856	chr1	54163740	54163856	chr1-54163480:54164455	chr1	54163480	54164455	chr1	54163480	54164315	chr1-54163453:54163629	chr1	54163453	54163629	chr1
chr1	54685928	54687044	0.228260869565217	-0.312364236051014	0.916666666666667	0.467857142857143	0.185528609752769	0.568278470492215	17	0.01239143709726	HyperLow	*	*	*	InterGenic	*	*	*	*	*	*	*	*	*	*	*	*	*	0	0	*	*	*	*	*	0	0	chr1-54686825:54687415	chr1	54686825	54687415	chr1	54686825	54687044	chr1-54686992:54688714	chr1	54686992	54688714	chr1
chr1	54703916	54705089	0.340336134453781	-0.0484753471621255	0.845098039215686	0.415413533834586	0.331846009973037	0.466376797130266	17	0.00235846422620429	HyperHigh	chr1	54694500	54704801	Intron14	-	SSBP3	protein_coding	chr1	54703916	54704801	0.754475703324808	0.0859139889331133	*	*	*	*	*	0	0	*	*	*	*	*	0	0	chr1-54704760:54704995	chr1	54704760	54704995	chr1	54704760	54704801	chr1-54704205:54704735	chr1	54704205	54704735	chr1
chr1	54703916	54705089	0.340336134453781	-0.0484753471621255	0.845098039215686	0.415413533834586	0.331846009973037	0.466376797130266	17	0.00235846422620429	HyperHigh	chr1	54704802	54704872	Exon14	-	SSBP3	protein_coding	chr1	54704802	54704872	0.0596760443307758	1	*	*	*	*	*	0	0	*	*	*	*	*	0	0	chr1-54704760:54704995	chr1	54704760	54704995	chr1	54704802	54704872	*	*	*	*	*
chr1	54703916	54705089	0.340336134453781	-0.0484753471621255	0.845098039215686	0.415413533834586	0.331846009973037	0.466376797130266	17	0.00235846422620429	HyperHigh	chr1	54704873	54706577	Intron13	-	SSBP3	protein_coding	chr1	54704873	54705089	0.184143222506394	0.126760563380282	*	*	*	*	*	0	0	*	*	*	*	*	0	0	chr1-54705045:54705195	chr1	54705045	54705195	chr1	54705045	54705089	*	*	*	*	*
chr1	54703916	54705089	0.340336134453781	-0.0484753471621255	0.845098039215686	0.415413533834586	0.331846009973037	0.466376797130266	17	0.00235846422620429	HyperHigh	chr1	54703710	54704736	FirstExon	+	SSBP3-AS1	protein_coding	chr1	54703916	54704736	0.699062233589088	0.799220272904483	*	*	*	*	*	0	0	*	*	*	*	*	0	0	chr1-54704500:54704650	chr1	54704500	54704650	chr1	54704500	54704650	chr1-54704205:54704735	chr1	54704205	54704735	chr1
chr1	54719786	54720379	0.531010230179028	-0.094881856675316	0.878676470588236	0.303030303030303	0.255534369891082	0.434598556065973	15	0.00010022840262953	HyperMid	chr1	54717534	54722799	Intron7	-	SSBP3	protein_coding	chr1	54719786	54720379	1	0.112630579297246	*	*	*	*	*	0	0	*	*	*	*	*	0	0	chr1-54719760:54720355	chr1	54719760	54720355	chr1	54719786	54720355	chr1-54720043:54720327	chr1	54720043	54720327	chr1
chr1	54861734	54862955	0.118808049535604	-0.268805764793441	1	0.845098039215686	0.18920620363032	0.447208749841447	17	0.000428256928677722	HypoLow	chr1	54747201	54867533	Intron4	-	SSBP3	protein_coding	chr1	54861734	54862955	1	0.0101469268357544	*	*	*	*	*	0	0	*	*	*	*	*	0	0	chr1-54862745:54863250	chr1	54862745	54863250	chr1	54862745	54862955	chr1-54862777:54863007	chr1	54862777	54863007	chr1
chr1	54929214	54931576	-0.136363636363636	-0.306098611351497	0.166666666666667	0.4375	0.306098611351497	0.641608022245798	28	0.0188382136887618	HypoLow	*	*	*	InterGenic	*	*	*	*	*	*	*	*	*	*	*	*	*	0	0	chr1:54929582-54929903	chr1	54929582	54929903	chr1	54929582	54929903	chr1-54930980:54931415	chr1	54930980	54931415	chr1	54930980	54931415	chr1-54931341:54931721	chr1	54931341	54931721	chr1
chr1	55168829	55177615	0.0819397993311035	-0.25781878746449	1	0.866600790513834	0.228658419422619	0.428727354443158	75	8.02211200263647e-09	HypoLow	chr1	55168419	55172107	Intron21	+	MROH7-TTC4	protein_coding	chr1	55168829	55172107	0.373093557933075	0.88882863340564	*	*	*	*	*	0	0	*	*	*	*	*	0	0	chr1-55172085:55172415	chr1	55172085	55172415	chr1	55172085	55172107	chr1-55172071:55172683	chr1	55172071	55172683	chr1
chr1	55168829	55177615	0.0819397993311035	-0.25781878746449	1	0.866600790513834	0.228658419422619	0.428727354443158	75	8.02211200263647e-09	HypoLow	chr1	55172108	55172210	Exon22	+	MROH7-TTC4	protein_coding	chr1	55172108	55172210	0.0116093785567949	1	*	*	*	*	*	0	0	*	*	*	*	*	0	0	chr1-55172085:55172415	chr1	55172085	55172415	chr1	55172108	55172210	chr1-55172071:55172683	chr1	55172071	55172683	chr1
chr1	55168829	55177615	0.0819397993311035	-0.25781878746449	1	0.866600790513834	0.228658419422619	0.428727354443158	75	8.02211200263647e-09	HypoLow	chr1	55172211	55174686	Intron22	+	MROH7-TTC4	protein_coding	chr1	55172211	55174686	0.281698156157523	1	*	*	*	*	*	0	0	*	*	*	*	*	0	0	chr1-55174165:55174315	chr1	55174165	55174315	chr1	55174165	55174315	chr1-55172071:55172683	chr1	55172071	55172683	chr1
chr1	55168829	55177615	0.0819397993311035	-0.25781878746449	1	0.866600790513834	0.228658419422619	0.428727354443158	75	8.02211200263647e-09	HypoLow	chr1	55174687	55174749	Exon23	+	MROH7-TTC4	protein_coding	chr1	55174687	55174749	0.007056681083542	1	*	*	*	*	*	0	0	*	*	*	*	*	0	0	*	*	*	*	*	0	0	*	*	*	*	*
chr1	55168829	55177615	0.0819397993311035	-0.25781878746449	1	0.866600790513834	0.228658419422619	0.428727354443158	75	8.02211200263647e-09	HypoLow	chr1	55174750	55181195	Intron23	+	MROH7-TTC4	protein_coding	chr1	55174750	55177615	0.326086956521739	0.444530643910008	*	*	*	*	*	0	0	*	*	*	*	*	0	0	chr1-55176925:55177195	chr1	55176925	55177195	chr1	55176925	55177195	chr1-55175891:55176175	chr1	55175891	55176175	chr1
chr1	55168829	55177615	0.0819397993311035	-0.25781878746449	1	0.866600790513834	0.228658419422619	0.428727354443158	75	8.02211200263647e-09	HypoLow	chr1	55168419	55172107	Intron21	+	MROH7	protein_coding	chr1	55168829	55172107	0.373093557933075	0.88882863340564	*	*	*	*	*	0	0	*	*	*	*	*	0	0	chr1-55172085:55172415	chr1	55172085	55172415	chr1	55172085	55172107	chr1-55172071:55172683	chr1	55172071	55172683	chr1
chr1	55168829	55177615	0.0819397993311035	-0.25781878746449	1	0.866600790513834	0.228658419422619	0.428727354443158	75	8.02211200263647e-09	HypoLow	chr1	55172108	55172210	Exon22	+	MROH7	protein_coding	chr1	55172108	55172210	0.0116093785567949	1	*	*	*	*	*	0	0	*	*	*	*	*	0	0	chr1-55172085:55172415	chr1	55172085	55172415	chr1	55172108	55172210	chr1-55172071:55172683	chr1	55172071	55172683	chr1
chr1	55168829	55177615	0.0819397993311035	-0.25781878746449	1	0.866600790513834	0.228658419422619	0.428727354443158	75	8.02211200263647e-09	HypoLow	chr1	55172211	55174686	Intron22	+	MROH7	protein_coding	chr1	55172211	55174686	0.281698156157523	1	*	*	*	*	*	0	0	*	*	*	*	*	0	0	chr1-55174165:55174315	chr1	55174165	55174315	chr1	55174165	55174315	chr1-55172071:55172683	chr1	55172071	55172683	chr1
chr1	55168829	55177615	0.0819397993311035	-0.25781878746449	1	0.866600790513834	0.228658419422619	0.428727354443158	75	8.02211200263647e-09	HypoLow	chr1	55174687	55174749	Exon23	+	MROH7	protein_coding	chr1	55174687	55174749	0.007056681083542	1	*	*	*	*	*	0	0	*	*	*	*	*	0	0	*	*	*	*	*	0	0	*	*	*	*	*
chr1	55168829	55177615	0.0819397993311035	-0.25781878746449	1	0.866600790513834	0.228658419422619	0.428727354443158	75	8.02211200263647e-09	HypoLow	chr1	55174750	55175618	Intron23	+	MROH7	protein_coding	chr1	55174750	55175618	0.098793535169588	1	*	*	*	*	*	0	0	*	*	*	*	*	0	0	chr1-55175565:55175815	chr1	55175565	55175815	chr1	55175565	55175618	chr1-55175278:55175568	chr1	55175278	55175568	chr1
chr1	55168829	55177615	0.0819397993311035	-0.25781878746449	1	0.866600790513834	0.228658419422619	0.428727354443158	75	8.02211200263647e-09	HypoLow	chr1	55175619	55175932	LastExon	+	MROH7	protein_coding	chr1	55175619	55175932	0.035624857728204	1	*	*	*	*	*	0	0	*	*	*	*	*	0	0	chr1-55175565:55175815	chr1	55175565	55175815	chr1	55175619	55175815	chr1-55175891:55176175	chr1	55175891	55176175	chr1
chr1	55462577	55462988	0.205882352941176	0.429869519449384	0.384615384615385	0.0526315789473684	0.610749629866743	0.15633186452976	14	0.0114003878890574	HyperHigh	*	*	*	InterGenic	*	*	*	*	*	*	*	*	CpG: 33	chr1	55462688	55463010	chr1	55462688	55462988	*	*	*	*	*	0	0	chr1-55462345:55463055	chr1	55462345	55463055	chr1	55462577	55462988	chr1-55462826:55462967	chr1	55462826	55462967	chr1
chr1	55465936	55469099	-0.075892857142857	0.203739270407367	0.833333333333333	0.935416666666667	0.478928701673459	0.306098611351497	23	0.0687596913891813	HypoHigh	chr1	55465037	55470694	Intron1	+	BSND	protein_coding	chr1	55465936	55469099	1	0.559130281067704	*	*	*	*	*	0	0	*	*	*	*	*	0	0	chr1-55468305:55468515	chr1	55468305	55468515	chr1	55468305	55468515	chr1-55468419:55468799	chr1	55468419	55468799	chr1
chr1	55725798	55726043	0.338522588522589	0.229026061149952	0.688095238095238	0.201923076923077	0.513097467058364	0.24768876689933	7	0.025974025974026	HyperHigh	*	*	*	InterGenic	*	*	*	*	*	*	*	*	*	*	*	*	*	0	0	chr1:55725974-55726130	chr1	55725974	55726130	chr1	55725974	55726043	chr1-55725905:55726190	chr1	55725905	55726190	chr1	55725905	55726043	chr1-55726006:55726166	chr1	55726006	55726166	chr1
chr1	57611204	57615030	0.105263157894737	-0.256190482618775	1	0.827586206896552	0.240642698295787	0.572927630709085	26	0.00328598445957165	HypoLow	chr1	57611103	57756635	Intron8	-	DAB1	protein_coding	chr1	57611204	57615030	1	0.0262897507077481	*	*	*	*	*	0	0	*	*	*	*	*	0	0	chr1-57613125:57613275	chr1	57613125	57613275	chr1	57613125	57613275	*	*	*	*	*
chr1	57653874	57668148	0.0881944444444445	-0.203564799808059	0.909090909090909	0.787593984962406	0.306098611351497	0.459594497828725	77	0.00140138805177989	HypoLow	chr1	57611103	57756635	Intron8	-	DAB1	protein_coding	chr1	57653874	57668148	1	0.0980815215897535	*	*	*	*	*	0	0	*	*	*	*	*	0	0	chr1-57668000:57668190	chr1	57668000	57668190	chr1	57668000	57668148	chr1-57667999:57668259	chr1	57667999	57668259	chr1
chr1	57994190	57997913	-0.240259740259741	0.035672569865119	0.4375	0.705882352941177	0.45698353148489	0.417209722462608	10	0.0377789063391997	HypoHigh	chr1	57756839	58115263	Intron7	-	DAB1	protein_coding	chr1	57994190	57997913	1	0.0103871392540678	*	*	*	*	*	0	0	chr1:57995135-57995251	chr1	57995135	57995251	chr1	57995135	57995251	chr1-57996920:57997070	chr1	57996920	57997070	chr1	57996920	57997070	chr1-57997754:57998350	chr1	57997754	57998350	chr1
chr1	58121377	58128086	0.0826388888888889	-0.258450089084512	0.925824175824176	0.822916666666667	0.29119125278132	0.483713304069404	45	0.00372249796045064	HypoLow	chr1	58115338	58349670	Intron6	-	DAB1	protein_coding	chr1	58121377	58128086	1	0.0286303193759282	*	*	*	*	*	0	0	*	*	*	*	*	0	0	chr1-58124240:58124490	chr1	58124240	58124490	chr1	58124240	58124490	*	*	*	*	*
chr1	58630768	58640509	0.0848484848484851	-0.278139814975071	0.941176470588235	0.85	0.197224259527442	0.478183046665067	76	1.55460083049229e-06	HypoLow	chr1	58616261	58809023	Intron4	-	DAB1	protein_coding	chr1	58630768	58640509	1	0.050533818906216	*	*	*	*	*	0	0	*	*	*	*	*	0	0	chr1-58635380:58635535	chr1	58635380	58635535	chr1	58635380	58635535	chr1-58640369:58640799	chr1	58640369	58640799	chr1
chr1	59041757	59043196	0.468253968253968	-0.203157334773078	0.741666666666666	0.285714285714286	0.467085146456331	0.640394198089342	47	1.69349702696509e-11	HyperLow	chr1	59041099	59043166	FirstExon	-	TACSTD2	protein_coding	chr1	59041757	59043166	0.979152189020153	0.681664247701984	CpG: 146	chr1	59042013	59043295	chr1	59042013	59043166	*	*	*	*	*	0	0	chr1-59041980:59043255	chr1	59041980	59043255	chr1	59041980	59043166	chr1-59043133:59043569	chr1	59043133	59043569	chr1
chr1	59041757	59043196	0.468253968253968	-0.203157334773078	0.741666666666666	0.285714285714286	0.467085146456331	0.640394198089342	47	1.69349702696509e-11	HyperLow	chr1	59043167	59044167	Promoter	-	TACSTD2	protein_coding	chr1	59043167	59043196	0.0201528839471855	0.029	CpG: 146	chr1	59042013	59043295	chr1	59043167	59043196	*	*	*	*	*	0	0	chr1-59041980:59043255	chr1	59041980	59043255	chr1	59043167	59043196	chr1-59043133:59043569	chr1	59043133	59043569	chr1
chr1	59285093	59287661	0.066666666666667	-0.270426041486378	1	0.9	0	0.307309364962454	24	0.00445435092336749	HypoLow	chr1	59250978	59359216	Intron1	+	RP4-794H19.2	lincRNA	chr1	59285093	59287661	1	0.0237254938191763	*	*	*	*	*	0	0	*	*	*	*	*	0	0	chr1-59287560:59287710	chr1	59287560	59287710	chr1	59287560	59287661	chr1-59286976:59287336	chr1	59286976	59287336	chr1
chr1	59328923	59348353	0.071428571428571	-0.216247282633975	1	0.882352941176471	0.162042321394155	0.394049733181077	109	2.19519241727726e-11	HypoLow	chr1	59250978	59359216	Intron1	+	RP4-794H19.2	lincRNA	chr1	59328923	59348353	1	0.179511816552412	*	*	*	*	*	0	0	chr1:59347262-59347482	chr1	59347262	59347482	chr1	59347262	59347482	chr1-59348320:59348695	chr1	59348320	59348695	chr1	59348320	59348353	chr1-59348036:59348486	chr1	59348036	59348486	chr1
chr1	59352449	59359430	0.076923076923077	-0.255121204225566	1	0.884615384615385	0	0.365143759852533	52	7.30712827949381e-07	HypoLow	chr1	59250978	59359216	Intron1	+	RP4-794H19.2	lincRNA	chr1	59352449	59359216	0.969345365993411	0.0625196326613574	*	*	*	*	*	0	0	chr1:59352858-59352971	chr1	59352858	59352971	chr1	59352858	59352971	chr1-59358985:59359235	chr1	59358985	59359235	chr1	59358985	59359216	chr1-59359191:59359471	chr1	59359191	59359471	chr1
chr1	59352449	59359430	0.076923076923077	-0.255121204225566	1	0.884615384615385	0	0.365143759852533	52	7.30712827949381e-07	HypoLow	chr1	59359217	59359389	Exon2	+	RP4-794H19.2	lincRNA	chr1	59359217	59359389	0.0246383039679129	1	*	*	*	*	*	0	0	*	*	*	*	*	0	0	chr1-59359240:59359490	chr1	59359240	59359490	chr1	59359240	59359389	chr1-59359191:59359471	chr1	59359191	59359471	chr1
chr1	59352449	59359430	0.076923076923077	-0.255121204225566	1	0.884615384615385	0	0.365143759852533	52	7.30712827949381e-07	HypoLow	chr1	59359390	59361928	Intron2	+	RP4-794H19.2	lincRNA	chr1	59359390	59359430	0.00572983813207277	0.0157604412923562	*	*	*	*	*	0	0	*	*	*	*	*	0	0	chr1-59359240:59359490	chr1	59359240	59359490	chr1	59359390	59359430	chr1-59359191:59359471	chr1	59359191	59359471	chr1
chr1	59352449	59359430	0.076923076923077	-0.255121204225566	1	0.884615384615385	0	0.365143759852533	52	7.30712827949381e-07	HypoLow	chr1	59349407	59354820	Intron3	-	RP4-794H19.1	lincRNA	chr1	59352449	59354820	0.339636155278613	0.438019582486606	*	*	*	*	*	0	0	chr1:59352858-59352971	chr1	59352858	59352971	chr1	59352858	59352971	chr1-59354485:59354875	chr1	59354485	59354875	chr1	59354485	59354820	chr1-59354719:59355035	chr1	59354719	59355035	chr1
chr1	59352449	59359430	0.076923076923077	-0.255121204225566	1	0.884615384615385	0	0.365143759852533	52	7.30712827949381e-07	HypoLow	chr1	59354821	59354880	Exon3	-	RP4-794H19.1	lincRNA	chr1	59354821	59354880	0.00845151124480733	1	*	*	*	*	*	0	0	*	*	*	*	*	0	0	chr1-59354485:59354875	chr1	59354485	59354875	chr1	59354821	59354875	chr1-59354719:59355035	chr1	59354719	59355035	chr1
chr1	59352449	59359430	0.076923076923077	-0.255121204225566	1	0.884615384615385	0	0.365143759852533	52	7.30712827949381e-07	HypoLow	chr1	59354881	59361516	Intron2	-	RP4-794H19.1	lincRNA	chr1	59354881	59359430	0.651625841569976	0.685606631499623	*	*	*	*	*	0	0	*	*	*	*	*	0	0	chr1-59359240:59359490	chr1	59359240	59359490	chr1	59359240	59359430	chr1-59359191:59359471	chr1	59359191	59359471	chr1
chr1	59697080	59711914	0.095614035087719	-0.226716441054733	1	0.866666666666667	0	0.328808909576947	57	4.61016197664471e-09	HypoLow	*	*	*	InterGenic	*	*	*	*	*	*	*	*	*	*	*	*	*	0	0	*	*	*	*	*	0	0	chr1-59709220:59709535	chr1	59709220	59709535	chr1	59709220	59709535	chr1-59710657:59710889	chr1	59710657	59710889	chr1
chr1	59726297	59740199	0.059090909090909	-0.216674140549451	1	0.85	0	0.333333333333333	48	2.38929194826804e-05	HypoLow	*	*	*	InterGenic	*	*	*	*	*	*	*	*	*	*	*	*	*	0	0	chr1:59738174-59738538	chr1	59738174	59738538	chr1	59738174	59738538	chr1-59738125:59738555	chr1	59738125	59738555	chr1	59738125	59738555	chr1-59738354:59738518	chr1	59738354	59738518	chr1
chr1	60119194	60125840	0.05	-0.207260379179207	0.952380952380952	0.909090909090909	0	0.287706856188877	56	3.2965937328626e-05	HypoLow	chr1	60107024	60125890	Intron12	+	FGGY	protein_coding	chr1	60119194	60125840	1	0.352273931941058	*	*	*	*	*	0	0	*	*	*	*	*	0	0	chr1-60123640:60123855	chr1	60123640	60123855	chr1	60123640	60123855	chr1-60124142:60124398	chr1	60124142	60124398	chr1
chr1	60280087	60281112	0.300699300699301	0.267834115526386	0.461538461538462	0.105263157894737	0.627031586703358	0.410319854371337	36	3.22439493835089e-05	HyperHigh	chr1	60279532	60280532	Promoter	+	HOOK1	protein_coding	chr1	60280087	60280532	0.434146341463415	0.445	*	*	*	*	*	0	0	*	*	*	*	*	0	0	chr1-60280160:60280595	chr1	60280160	60280595	chr1	60280160	60280532	chr1-60280527:60281031	chr1	60280527	60281031	chr1
chr1	60280087	60281112	0.300699300699301	0.267834115526386	0.461538461538462	0.105263157894737	0.627031586703358	0.410319854371337	36	3.22439493835089e-05	HyperHigh	chr1	60280533	60280852	FirstExon	+	HOOK1	protein_coding	chr1	60280533	60280852	0.311219512195122	1	CpG: 49	chr1	60280624	60281048	chr1	60280624	60280852	*	*	*	*	*	0	0	chr1-60280725:60281135	chr1	60280725	60281135	chr1	60280725	60280852	chr1-60280829:60281113	chr1	60280829	60281113	chr1
chr1	60280087	60281112	0.300699300699301	0.267834115526386	0.461538461538462	0.105263157894737	0.627031586703358	0.410319854371337	36	3.22439493835089e-05	HyperHigh	chr1	60280853	60287529	Intron1	+	HOOK1	protein_coding	chr1	60280853	60281112	0.252682926829268	0.0387956860395446	CpG: 49	chr1	60280624	60281048	chr1	60280853	60281048	*	*	*	*	*	0	0	chr1-60280725:60281135	chr1	60280725	60281135	chr1	60280853	60281112	chr1-60281058:60281569	chr1	60281058	60281569	chr1
chr1	60462757	60468692	0.141176470588235	-0.323207556205547	1	0.791666666666667	0.306098611351497	0.615479781557005	30	0.00312351981483697	HypoLow	chr1	60456506	60463280	Intron11	-	C1orf87	protein_coding	chr1	60462757	60463280	0.0881213142375737	0.0772069678181281	*	*	*	*	*	0	0	*	*	*	*	*	0	0	chr1-60463240:60463530	chr1	60463240	60463530	chr1	60463240	60463280	chr1-60463266:60463522	chr1	60463266	60463522	chr1
chr1	60462757	60468692	0.141176470588235	-0.323207556205547	1	0.791666666666667	0.306098611351497	0.615479781557005	30	0.00312351981483697	HypoLow	chr1	60463281	60463488	Exon11	-	C1orf87	protein_coding	chr1	60463281	60463488	0.0348778433024431	1	*	*	*	*	*	0	0	*	*	*	*	*	0	0	chr1-60463240:60463530	chr1	60463240	60463530	chr1	60463281	60463488	chr1-60463295:60463615	chr1	60463295	60463615	chr1
chr1	60462757	60468692	0.141176470588235	-0.323207556205547	1	0.791666666666667	0.306098611351497	0.615479781557005	30	0.00312351981483697	HypoLow	chr1	60463489	60466748	Intron10	-	C1orf87	protein_coding	chr1	60463489	60466748	0.549115417017692	1	*	*	*	*	*	0	0	*	*	*	*	*	0	0	chr1-60464760:60464970	chr1	60464760	60464970	chr1	60464760	60464970	chr1-60465504:60465784	chr1	60465504	60465784	chr1
chr1	60462757	60468692	0.141176470588235	-0.323207556205547	1	0.791666666666667	0.306098611351497	0.615479781557005	30	0.00312351981483697	HypoLow	chr1	60466749	60466828	Exon10	-	C1orf87	protein_coding	chr1	60466749	60466828	0.0133108677337826	1	*	*	*	*	*	0	0	*	*	*	*	*	0	0	*	*	*	*	*	0	0	*	*	*	*	*
chr1	60462757	60468692	0.141176470588235	-0.323207556205547	1	0.791666666666667	0.306098611351497	0.615479781557005	30	0.00312351981483697	HypoLow	chr1	60466829	60476063	Intron9	-	C1orf87	protein_coding	chr1	60466829	60468692	0.313900589721988	0.201754385964912	*	*	*	*	*	0	0	*	*	*	*	*	0	0	*	*	*	*	*	0	0	*	*	*	*	*
chr1	61425617	61431117	-0.066666666666667	0.27132209454908	0.882352941176471	1	0.453654682481227	0.167752778258549	24	0.0287630665592249	HypoHigh	chr1	61331139	61553820	Intron1	+	NFIA	protein_coding	chr1	61425617	61431117	1	0.0246990088961339	*	*	*	*	*	0	0	*	*	*	*	*	0	0	chr1-61431060:61431430	chr1	61431060	61431430	chr1	61431060	61431117	chr1-61431083:61431208	chr1	61431083	61431208	chr1
chr1	61425617	61431117	-0.066666666666667	0.27132209454908	0.882352941176471	1	0.453654682481227	0.167752778258549	24	0.0287630665592249	HypoHigh	chr1	61420275	61429237	Intron2	-	RP4-668G5.1	antisense	chr1	61425617	61429237	0.658181818181818	0.403927694711002	*	*	*	*	*	0	0	*	*	*	*	*	0	0	chr1-61428840:61429135	chr1	61428840	61429135	chr1	61428840	61429135	chr1-61428783:61429183	chr1	61428783	61429183	chr1
chr1	61425617	61431117	-0.066666666666667	0.27132209454908	0.882352941176471	1	0.453654682481227	0.167752778258549	24	0.0287630665592249	HypoHigh	chr1	61429238	61429476	Exon2	-	RP4-668G5.1	antisense	chr1	61429238	61429476	0.0432727272727273	1	*	*	*	*	*	0	0	*	*	*	*	*	0	0	chr1-61429260:61429470	chr1	61429260	61429470	chr1	61429260	61429470	chr1-61428620:61429289	chr1	61428620	61429289	chr1
chr1	61425617	61431117	-0.066666666666667	0.27132209454908	0.882352941176471	1	0.453654682481227	0.167752778258549	24	0.0287630665592249	HypoHigh	chr1	61429477	61436219	Intron1	-	RP4-668G5.1	antisense	chr1	61429477	61431117	0.298181818181818	0.243251260753486	*	*	*	*	*	0	0	*	*	*	*	*	0	0	chr1-61431060:61431430	chr1	61431060	61431430	chr1	61431060	61431117	chr1-61431083:61431208	chr1	61431083	61431208	chr1
chr1	61508656	61509395	0.222222222222222	-0.079875549625657	0.714285714285714	0.142857142857143	0.306098611351497	0.353759374819711	20	0.0231025653813835	HyperHigh	chr1	61331139	61553820	Intron1	+	NFIA	protein_coding	chr1	61508656	61509395	1	0.00331864864986236	CpG: 70	chr1	61508642	61509282	chr1	61508656	61509282	chr1:61509124-61509443	chr1	61509124	61509443	chr1	61509124	61509395	chr1-61508680:61509455	chr1	61508680	61509455	chr1	61508680	61509395	chr1-61509384:61510040	chr1	61509384	61510040	chr1
chr1	61851567	61862436	0.054093567251462	-0.209681686968612	0.909090909090909	0.857142857142857	0.279066448837627	0.429355662293201	75	0.00417452632529962	HypoLow	chr1	61849038	61869775	Intron7	+	NFIA	protein_coding	chr1	61851567	61862436	1	0.524135603028403	*	*	*	*	*	0	0	*	*	*	*	*	0	0	chr1-61861340:61861490	chr1	61861340	61861490	chr1	61861340	61861490	chr1-61860888:61861169	chr1	61860888	61861169	chr1
chr1	62207408	62208511	0.0791666666666666	0.244060669144479	0.117647058823529	0	0.329583798094844	0.120765276943716	33	0.0104991062755491	HypoHigh	chr1	62207670	62208096	FirstExon	-	RP11-430G17.3	lincRNA	chr1	62207670	62208096	0.386219401631913	1	CpG: 89	chr1	62207827	62208818	chr1	62207827	62208096	*	*	*	*	*	0	0	chr1-62207125:62208215	chr1	62207125	62208215	chr1	62207670	62208096	chr1-62208088:62208698	chr1	62208088	62208698	chr1
chr1	62207408	62208511	0.0791666666666666	0.244060669144479	0.117647058823529	0	0.329583798094844	0.120765276943716	33	0.0104991062755491	HypoHigh	chr1	62208097	62209097	Promoter	-	RP11-430G17.3	lincRNA	chr1	62208097	62208511	0.375339981867634	0.414	CpG: 89	chr1	62207827	62208818	chr1	62208097	62208511	*	*	*	*	*	0	0	chr1-62208265:62209295	chr1	62208265	62209295	chr1	62208265	62208511	chr1-62208491:62208887	chr1	62208491	62208887	chr1
chr1	62207408	62208511	0.0791666666666666	0.244060669144479	0.117647058823529	0	0.329583798094844	0.120765276943716	33	0.0104991062755491	HypoHigh	chr1	62207148	62208148	Promoter	+	INADL	protein_coding	chr1	62207408	62208148	0.670897552130553	0.74	CpG: 89	chr1	62207827	62208818	chr1	62207827	62208148	*	*	*	*	*	0	0	chr1-62207125:62208215	chr1	62207125	62208215	chr1	62207408	62208148	chr1-62208120:62208588	chr1	62208120	62208588	chr1
chr1	62207408	62208511	0.0791666666666666	0.244060669144479	0.117647058823529	0	0.329583798094844	0.120765276943716	33	0.0104991062755491	HypoHigh	chr1	62208149	62208227	FirstExon	+	INADL	protein_coding	chr1	62208149	62208227	0.0707162284678151	1	CpG: 89	chr1	62207827	62208818	chr1	62208149	62208227	*	*	*	*	*	0	0	chr1-62207125:62208215	chr1	62207125	62208215	chr1	62208149	62208215	chr1-62208220:62208670	chr1	62208220	62208670	chr1
chr1	62207408	62208511	0.0791666666666666	0.244060669144479	0.117647058823529	0	0.329583798094844	0.120765276943716	33	0.0104991062755491	HypoHigh	chr1	62208228	62228529	Intron1	+	INADL	protein_coding	chr1	62208228	62208511	0.256572982774252	0.0139401999901483	CpG: 89	chr1	62207827	62208818	chr1	62208228	62208511	*	*	*	*	*	0	0	chr1-62208265:62209295	chr1	62208265	62209295	chr1	62208265	62208511	chr1-62208491:62208887	chr1	62208491	62208887	chr1
chr1	62208565	62209172	0.315789473684211	0.043418438768345	0.7	0.176470588235294	0.450548038384464	0.328808909576947	20	0.00174801045214274	HyperHigh	chr1	62208097	62209097	Promoter	-	RP11-430G17.3	lincRNA	chr1	62208565	62209097	0.876441515650741	0.532	CpG: 89	chr1	62207827	62208818	chr1	62208565	62208818	chr1:62208815-62209373	chr1	62208815	62209373	chr1	62208815	62209097	chr1-62208265:62209295	chr1	62208265	62209295	chr1	62208565	62209097	chr1-62208981:62209221	chr1	62208981	62209221	chr1
chr1	62208565	62209172	0.315789473684211	0.043418438768345	0.7	0.176470588235294	0.450548038384464	0.328808909576947	20	0.00174801045214274	HyperHigh	chr1	62208228	62228529	Intron1	+	INADL	protein_coding	chr1	62208565	62209172	1	0.0299000049258657	CpG: 89	chr1	62207827	62208818	chr1	62208565	62208818	chr1:62208815-62209373	chr1	62208815	62209373	chr1	62208815	62209172	chr1-62208265:62209295	chr1	62208265	62209295	chr1	62208565	62209172	chr1-62208981:62209221	chr1	62208981	62209221	chr1
chr1	62784136	62784370	0.284920634920635	-0.103635410146876	0.851648351648352	0.422222222222222	0.395158432409112	0.512103943982527	11	0.0099957741590545	HyperLow	chr1	62747307	62784776	Intron1	-	KANK4	protein_coding	chr1	62784136	62784370	1	0.00624516266780539	CpG: 103	chr1	62784136	62785133	chr1	62784136	62784370	*	*	*	*	*	0	0	chr1-62784025:62784475	chr1	62784025	62784475	chr1	62784136	62784370	chr1-62784302:62785078	chr1	62784302	62785078	chr1
chr1	63785428	63792280	0.219884149311898	0.0574433490009746	0.6	0.229020979020979	0.559109272349011	0.49645842584644	167	1.61734627891208e-13	HyperHigh	chr1	63786555	63786861	LastExon	-	RP4-792G4.2	antisense	chr1	63786555	63786861	0.0446584938704028	1	CpG: 561	chr1	63782394	63790471	chr1	63786555	63786861	*	*	*	*	*	0	0	chr1-63786760:63787170	chr1	63786760	63787170	chr1	63786760	63786861	chr1-63786708:63787164	chr1	63786708	63787164	chr1
chr1	63785428	63792280	0.219884149311898	0.0574433490009746	0.6	0.229020979020979	0.559109272349011	0.49645842584644	167	1.61734627891208e-13	HyperHigh	chr1	63786862	63787037	Intron2	-	RP4-792G4.2	antisense	chr1	63786862	63787037	0.0255399883245768	1	CpG: 561	chr1	63782394	63790471	chr1	63786862	63787037	*	*	*	*	*	0	0	chr1-63786760:63787170	chr1	63786760	63787170	chr1	63786862	63787037	chr1-63786708:63787164	chr1	63786708	63787164	chr1
chr1	63785428	63792280	0.219884149311898	0.0574433490009746	0.6	0.229020979020979	0.559109272349011	0.49645842584644	167	1.61734627891208e-13	HyperHigh	chr1	63787038	63787134	Exon2	-	RP4-792G4.2	antisense	chr1	63787038	63787134	0.0140105078809107	1	CpG: 561	chr1	63782394	63790471	chr1	63787038	63787134	*	*	*	*	*	0	0	chr1-63786760:63787170	chr1	63786760	63787170	chr1	63787038	63787134	chr1-63787087:63787343	chr1	63787087	63787343	chr1
chr1	63785428	63792280	0.219884149311898	0.0574433490009746	0.6	0.229020979020979	0.559109272349011	0.49645842584644	167	1.61734627891208e-13	HyperHigh	chr1	63787135	63790025	Intron1	-	RP4-792G4.2	antisense	chr1	63787135	63790025	0.421774664331582	1	CpG: 561	chr1	63782394	63790471	chr1	63787135	63790025	*	*	*	*	*	0	0	chr1-63789965:63790475	chr1	63789965	63790475	chr1	63789965	63790025	chr1-63790001:63790337	chr1	63790001	63790337	chr1
chr1	63785428	63792280	0.219884149311898	0.0574433490009746	0.6	0.229020979020979	0.559109272349011	0.49645842584644	167	1.61734627891208e-13	HyperHigh	chr1	63790026	63790112	FirstExon	-	RP4-792G4.2	antisense	chr1	63790026	63790112	0.0125510799766492	1	CpG: 561	chr1	63782394	63790471	chr1	63790026	63790112	*	*	*	*	*	0	0	chr1-63789965:63790475	chr1	63789965	63790475	chr1	63790026	63790112	chr1-63790108:63790628	chr1	63790108	63790628	chr1
chr1	63785428	63792280	0.219884149311898	0.0574433490009746	0.6	0.229020979020979	0.559109272349011	0.49645842584644	167	1.61734627891208e-13	HyperHigh	chr1	63790113	63791113	Promoter	-	RP4-792G4.2	antisense	chr1	63790113	63791113	0.145942790426153	1	CpG: 561	chr1	63782394	63790471	chr1	63790113	63790471	*	*	*	*	*	0	0	chr1-63791065:63791430	chr1	63791065	63791430	chr1	63791065	63791113	chr1-63790326:63790489	chr1	63790326	63790489	chr1
chr1	63785428	63792280	0.219884149311898	0.0574433490009746	0.6	0.229020979020979	0.559109272349011	0.49645842584644	167	1.61734627891208e-13	HyperHigh	chr1	63787729	63788729	Promoter	+	FOXD3	protein_coding	chr1	63787729	63788729	0.145942790426153	1	CpG: 561	chr1	63782394	63790471	chr1	63787729	63788729	*	*	*	*	*	0	0	chr1-63788345:63789835	chr1	63788345	63789835	chr1	63788345	63788729	chr1-63788608:63789213	chr1	63788608	63789213	chr1
chr1	63785428	63792280	0.219884149311898	0.0574433490009746	0.6	0.229020979020979	0.559109272349011	0.49645842584644	167	1.61734627891208e-13	HyperHigh	chr1	63788730	63790797	FirstExon	+	FOXD3	protein_coding	chr1	63788730	63790797	0.301663747810858	1	CpG: 561	chr1	63782394	63790471	chr1	63788730	63790471	*	*	*	*	*	0	0	chr1-63789965:63790475	chr1	63789965	63790475	chr1	63789965	63790475	chr1-63790326:63790489	chr1	63790326	63790489	chr1
chr1	63795241	63796240	0.224213286713286	0.162051655838463	0.414772727272728	0.16025641025641	0.528320833573719	0.440432111228287	29	0.00394473606396291	HyperHigh	*	*	*	InterGenic	*	*	*	*	*	*	*	*	CpG: 66	chr1	63795363	63796140	chr1	63795363	63796140	*	*	*	*	*	0	0	chr1-63796205:63796615	chr1	63796205	63796615	chr1	63796205	63796240	chr1-63796151:63796641	chr1	63796151	63796641	chr1
chr1	64966379	64968840	-0.081730769230769	0.264388798375234	0.866666666666666	0.959166666666667	0.503654682481227	0.273370654823642	15	0.0662957715614278	HypoHigh	chr1	64936626	65016276	Intron1	+	CACHD1	protein_coding	chr1	64966379	64968840	1	0.0308976773383553	*	*	*	*	*	0	0	*	*	*	*	*	0	0	chr1-64968680:64968895	chr1	64968680	64968895	chr1	64968680	64968840	chr1-64968576:64969016	chr1	64968576	64969016	chr1
chr1	65990801	65991908	0.223214285714286	0.023421186986438	0.714285714285714	0.413793103448276	0.618854920710318	0.524467484139256	28	0.00658090602314877	HyperHigh	chr1	65891062	66031228	Intron2	+	LEPR	protein_coding	chr1	65990801	65991908	1	0.0078977783485296	CpG: 88	chr1	65991001	65991811	chr1	65991001	65991811	*	*	*	*	*	0	0	chr1-65991905:65992295	chr1	65991905	65992295	chr1	65991905	65991908	chr1-65991897:65992237	chr1	65991897	65992237	chr1
chr1	66023329	66035245	0.083333333333333	-0.240642698295787	1	0.857142857142857	0.197224259527442	0.382944951426972	66	8.31664177021179e-06	HypoLow	chr1	65891062	66031228	Intron2	+	LEPR	protein_coding	chr1	66023329	66031228	0.662890231621349	0.0563546081075296	*	*	*	*	*	0	0	*	*	*	*	*	0	0	chr1-66029660:66029850	chr1	66029660	66029850	chr1	66029660	66029850	chr1-66024011:66024255	chr1	66024011	66024255	chr1
chr1	66023329	66035245	0.083333333333333	-0.240642698295787	1	0.857142857142857	0.197224259527442	0.382944951426972	66	8.31664177021179e-06	HypoLow	chr1	66031229	66031288	Exon3	+	LEPR	protein_coding	chr1	66031229	66031288	0.0049513259483048	1	*	*	*	*	*	0	0	*	*	*	*	*	0	0	*	*	*	*	*	0	0	*	*	*	*	*
chr1	66023329	66035245	0.083333333333333	-0.240642698295787	1	0.857142857142857	0.197224259527442	0.382944951426972	66	8.31664177021179e-06	HypoLow	chr1	66031289	66036155	Intron3	+	LEPR	protein_coding	chr1	66031289	66035245	0.331990600872776	0.812988080558981	*	*	*	*	*	0	0	*	*	*	*	*	0	0	chr1-66032145:66032295	chr1	66032145	66032295	chr1	66032145	66032295	chr1-66034921:66035095	chr1	66034921	66035095	chr1
chr1	66257837	66259371	0.263157894736842	-0.029783343190591	0.769230769230769	0.4375	0.5	0.538110278386422	46	0.000391885428330269	HyperHigh	chr1	66257196	66258196	Promoter	+	PDE4B	protein_coding	chr1	66257837	66258196	0.234028683181226	0.359	*	*	*	*	*	0	0	*	*	*	*	*	0	0	chr1-66257840:66259015	chr1	66257840	66259015	chr1	66257840	66258196	chr1-66258143:66259366	chr1	66258143	66259366	chr1
chr1	66257837	66259371	0.263157894736842	-0.029783343190591	0.769230769230769	0.4375	0.5	0.538110278386422	46	0.000391885428330269	HyperHigh	chr1	66258197	66258313	FirstExon	+	PDE4B	protein_coding	chr1	66258197	66258313	0.075619295958279	1	*	*	*	*	*	0	0	*	*	*	*	*	0	0	chr1-66257840:66259015	chr1	66257840	66259015	chr1	66258197	66258313	chr1-66258143:66259366	chr1	66258143	66259366	chr1
chr1	66257837	66259371	0.263157894736842	-0.029783343190591	0.769230769230769	0.4375	0.5	0.538110278386422	46	0.000391885428330269	HyperHigh	chr1	66258314	66378927	Intron1	+	PDE4B	protein_coding	chr1	66258314	66259371	0.689048239895698	0.00876356611642195	CpG: 54	chr1	66258440	66258918	chr1	66258440	66258918	*	*	*	*	*	0	0	chr1-66259040:66259375	chr1	66259040	66259375	chr1	66259040	66259371	chr1-66259017:66259373	chr1	66259017	66259373	chr1
chr1	66798504	66800150	-0.425837320574162	-0.166270810877521	0.181818181818182	0.611111111111111	0.240642698295787	0.552580908834963	8	0.00315890713941138	HypoLow	chr1	66798304	66821209	Intron8	+	PDE4B	protein_coding	chr1	66798504	66800150	1	0.0718620388561449	*	*	*	*	*	0	0	*	*	*	*	*	0	0	chr1-66800080:66800310	chr1	66800080	66800310	chr1	66800080	66800150	chr1-66799993:66800383	chr1	66799993	66800383	chr1
chr1	67772626	67774056	0.275462962962963	0.229573958513622	0.375	0.0526315789473684	0.478183046665067	0.219450474152136	40	7.64931534362504e-06	HyperHigh	chr1	67772046	67773046	Promoter	+	IL12RB2	protein_coding	chr1	67772626	67773046	0.293706293706294	0.42	*	*	*	*	*	0	0	*	*	*	*	*	0	0	chr1-67772745:67774195	chr1	67772745	67774195	chr1	67772745	67773046	chr1-67773008:67773214	chr1	67773008	67773214	chr1
chr1	67772626	67774056	0.275462962962963	0.229573958513622	0.375	0.0526315789473684	0.478183046665067	0.219450474152136	40	7.64931534362504e-06	HyperHigh	chr1	67773047	67773650	FirstExon	+	IL12RB2	protein_coding	chr1	67773047	67773650	0.421678321678322	1	CpG: 60	chr1	67773329	67773767	chr1	67773329	67773650	*	*	*	*	*	0	0	chr1-67772745:67774195	chr1	67772745	67774195	chr1	67773047	67773650	chr1-67773457:67773787	chr1	67773457	67773787	chr1
chr1	67772626	67774056	0.275462962962963	0.229573958513622	0.375	0.0526315789473684	0.478183046665067	0.219450474152136	40	7.64931534362504e-06	HyperHigh	chr1	67773651	67786015	Intron1	+	IL12RB2	protein_coding	chr1	67773651	67774056	0.283216783216783	0.0327563895179554	CpG: 60	chr1	67773329	67773767	chr1	67773651	67773767	*	*	*	*	*	0	0	chr1-67772745:67774195	chr1	67772745	67774195	chr1	67773651	67774056	chr1-67773457:67773787	chr1	67773457	67773787	chr1
chr1	67993977	67999943	-0.080357142857143	0.201256564704331	0.861904761904762	0.95	0.444957589191678	0.283749559899731	49	1.72042433107014e-05	HypoHigh	chr1	67994312	67995312	Promoter	+	RP4-763G1.2	lincRNA	chr1	67994312	67995312	0.167616493462957	1	*	*	*	*	*	0	0	*	*	*	*	*	0	0	chr1-67995045:67995195	chr1	67995045	67995195	chr1	67995045	67995195	chr1-67994640:67995102	chr1	67994640	67995102	chr1
chr1	67993977	67999943	-0.080357142857143	0.201256564704331	0.861904761904762	0.95	0.444957589191678	0.283749559899731	49	1.72042433107014e-05	HypoHigh	chr1	67995313	67995432	FirstExon	+	RP4-763G1.2	lincRNA	chr1	67995313	67995432	0.0199463627220919	1	*	*	*	*	*	0	0	*	*	*	*	*	0	0	*	*	*	*	*	0	0	*	*	*	*	*
chr1	67993977	67999943	-0.080357142857143	0.201256564704331	0.861904761904762	0.95	0.444957589191678	0.283749559899731	49	1.72042433107014e-05	HypoHigh	chr1	67995433	67995997	Intron1	+	RP4-763G1.2	lincRNA	chr1	67995433	67995997	0.0945357023131076	1	*	*	*	*	*	0	0	*	*	*	*	*	0	0	chr1-67995860:67996055	chr1	67995860	67996055	chr1	67995860	67995997	*	*	*	*	*
chr1	67993977	67999943	-0.080357142857143	0.201256564704331	0.861904761904762	0.95	0.444957589191678	0.283749559899731	49	1.72042433107014e-05	HypoHigh	chr1	67995998	67996061	Exon2	+	RP4-763G1.2	lincRNA	chr1	67995998	67996061	0.0105598390881663	1	*	*	*	*	*	0	0	*	*	*	*	*	0	0	chr1-67995860:67996055	chr1	67995860	67996055	chr1	67995998	67996055	*	*	*	*	*
chr1	67993977	67999943	-0.080357142857143	0.201256564704331	0.861904761904762	0.95	0.444957589191678	0.283749559899731	49	1.72042433107014e-05	HypoHigh	chr1	67996062	67997788	Intron2	+	RP4-763G1.2	lincRNA	chr1	67996062	67997788	0.289306067717063	1	*	*	*	*	*	0	0	*	*	*	*	*	0	0	chr1-67997345:67997495	chr1	67997345	67997495	chr1	67997345	67997495	chr1-67997693:67998766	chr1	67997693	67998766	chr1
chr1	67993977	67999943	-0.080357142857143	0.201256564704331	0.861904761904762	0.95	0.444957589191678	0.283749559899731	49	1.72042433107014e-05	HypoHigh	chr1	67997789	67998012	LastExon	+	RP4-763G1.2	lincRNA	chr1	67997789	67998012	0.0373784780422394	1	*	*	*	*	*	0	0	*	*	*	*	*	0	0	*	*	*	*	*	0	0	chr1-67998007:67998568	chr1	67998007	67998568	chr1
chr1	68078735	68092971	0.104895104895105	-0.212293143811123	1	0.866666666666667	0.181188147733199	0.382944951426972	96	4.55752658132467e-13	HypoLow	*	*	*	InterGenic	*	*	*	*	*	*	*	*	*	*	*	*	*	0	0	chr1:68084470-68084693	chr1	68084470	68084693	chr1	68084470	68084693	chr1-68092620:68092850	chr1	68092620	68092850	chr1	68092620	68092850	chr1-68092230:68092775	chr1	68092230	68092775	chr1
chr1	68561433	68569129	0.043478260869565	-0.25583995836618	0.928571428571429	0.85	0.216674140549451	0.452259883149013	44	0.0384679415942661	HypoLow	chr1	68537557	68564325	Intron3	+	GNG12-AS1	antisense	chr1	68561433	68564325	0.375779625779626	0.108039450089659	*	*	*	*	*	0	0	*	*	*	*	*	0	0	chr1-68564205:68564355	chr1	68564205	68564355	chr1	68564205	68564325	*	*	*	*	*
chr1	68561433	68569129	0.043478260869565	-0.25583995836618	0.928571428571429	0.85	0.216674140549451	0.452259883149013	44	0.0384679415942661	HypoLow	chr1	68564326	68564519	Exon4	+	GNG12-AS1	antisense	chr1	68564326	68564519	0.0250779625779626	1	*	*	*	*	*	0	0	*	*	*	*	*	0	0	chr1-68564205:68564355	chr1	68564205	68564355	chr1	68564326	68564355	*	*	*	*	*
chr1	68561433	68569129	0.043478260869565	-0.25583995836618	0.928571428571429	0.85	0.216674140549451	0.452259883149013	44	0.0384679415942661	HypoLow	chr1	68564520	68565411	Intron4	+	GNG12-AS1	antisense	chr1	68564520	68565411	0.115774428274428	1	*	*	*	*	*	0	0	*	*	*	*	*	0	0	*	*	*	*	*	0	0	*	*	*	*	*
chr1	68561433	68569129	0.043478260869565	-0.25583995836618	0.928571428571429	0.85	0.216674140549451	0.452259883149013	44	0.0384679415942661	HypoLow	chr1	68565412	68565475	Exon5	+	GNG12-AS1	antisense	chr1	68565412	68565475	0.00818607068607069	1	*	*	*	*	*	0	0	*	*	*	*	*	0	0	*	*	*	*	*	0	0	*	*	*	*	*
chr1	68561433	68569129	0.043478260869565	-0.25583995836618	0.928571428571429	0.85	0.216674140549451	0.452259883149013	44	0.0384679415942661	HypoLow	chr1	68565476	68566380	Intron5	+	GNG12-AS1	antisense	chr1	68565476	68566380	0.117463617463617	1	*	*	*	*	*	0	0	*	*	*	*	*	0	0	*	*	*	*	*	0	0	*	*	*	*	*
chr1	68561433	68569129	0.043478260869565	-0.25583995836618	0.928571428571429	0.85	0.216674140549451	0.452259883149013	44	0.0384679415942661	HypoLow	chr1	68566381	68566457	Exon6	+	GNG12-AS1	antisense	chr1	68566381	68566457	0.00987525987525988	1	*	*	*	*	*	0	0	*	*	*	*	*	0	0	chr1-68566400:68566550	chr1	68566400	68566550	chr1	68566400	68566457	*	*	*	*	*
chr1	68561433	68569129	0.043478260869565	-0.25583995836618	0.928571428571429	0.85	0.216674140549451	0.452259883149013	44	0.0384679415942661	HypoLow	chr1	68566458	68583133	Intron6	+	GNG12-AS1	antisense	chr1	68566458	68569129	0.34706340956341	0.160179910044978	*	*	*	*	*	0	0	*	*	*	*	*	0	0	chr1-68568780:68569055	chr1	68568780	68569055	chr1	68568780	68569055	chr1-68568597:68569037	chr1	68568597	68569037	chr1
chr1	68561433	68569129	0.043478260869565	-0.25583995836618	0.928571428571429	0.85	0.216674140549451	0.452259883149013	44	0.0384679415942661	HypoLow	chr1	68564156	68564436	LastExon	-	WLS	protein_coding	chr1	68564156	68564436	0.0363825363825364	1	*	*	*	*	*	0	0	*	*	*	*	*	0	0	chr1-68564205:68564355	chr1	68564205	68564355	chr1	68564205	68564355	*	*	*	*	*
chr1	68561433	68569129	0.043478260869565	-0.25583995836618	0.928571428571429	0.85	0.216674140549451	0.452259883149013	44	0.0384679415942661	HypoLow	chr1	68564437	68603462	Intron11	-	WLS	protein_coding	chr1	68564437	68569129	0.60966735966736	0.120230621396541	*	*	*	*	*	0	0	*	*	*	*	*	0	0	chr1-68568780:68569055	chr1	68568780	68569055	chr1	68568780	68569055	chr1-68568597:68569037	chr1	68568597	68569037	chr1
chr1	69156169	69163309	0.049299719887955	-0.201113947149886	0.881944444444444	0.745989304812834	0.312727016302054	0.507309364962454	37	0.0616803574793234	HypoLow	*	*	*	InterGenic	*	*	*	*	*	*	*	*	*	*	*	*	*	0	0	*	*	*	*	*	0	0	chr1-69157765:69157915	chr1	69157765	69157915	chr1	69157765	69157915	*	*	*	*	*
chr1	70032456	70035545	0.212100764732343	0.213442986862372	0.421052631578947	0.106203007518797	0.614801722974687	0.399507770536734	89	8.40781110303224e-08	HyperHigh	chr1	70033080	70034080	Promoter	+	LRRC7	protein_coding	chr1	70033080	70034080	0.323729362253156	1	CpG: 133	chr1	70032967	70034495	chr1	70033080	70034080	*	*	*	*	*	0	0	chr1-70033425:70034375	chr1	70033425	70034375	chr1	70033425	70034080	chr1-70033882:70034262	chr1	70033882	70034262	chr1
chr1	70032456	70035545	0.212100764732343	0.213442986862372	0.421052631578947	0.106203007518797	0.614801722974687	0.399507770536734	89	8.40781110303224e-08	HyperHigh	chr1	70034081	70034324	FirstExon	+	LRRC7	protein_coding	chr1	70034081	70034324	0.078666235027517	1	CpG: 133	chr1	70032967	70034495	chr1	70034081	70034324	*	*	*	*	*	0	0	chr1-70033425:70034375	chr1	70033425	70034375	chr1	70034081	70034324	chr1-70034251:70034440	chr1	70034251	70034440	chr1
chr1	70032456	70035545	0.212100764732343	0.213442986862372	0.421052631578947	0.106203007518797	0.614801722974687	0.399507770536734	89	8.40781110303224e-08	HyperHigh	chr1	70034325	70144063	Intron1	+	LRRC7	protein_coding	chr1	70034325	70035545	0.394949821948851	0.0111173886894239	CpG: 133	chr1	70032967	70034495	chr1	70034325	70034495	chr1:70034819-70036254	chr1	70034819	70036254	chr1	70034819	70035545	chr1-70035285:70035575	chr1	70035285	70035575	chr1	70035285	70035545	chr1-70035533:70035793	chr1	70035533	70035793	chr1
chr1	70342233	70344790	-0.299019607843137	0.155318865840901	0.233333333333334	0.815686274509804	0.458289014656807	0.452848462458315	13	0.0397093282535411	HypoHigh	chr1	70303967	70397189	Intron8	+	LRRC7	protein_coding	chr1	70342233	70344790	1	0.0274291476260968	*	*	*	*	*	0	0	*	*	*	*	*	0	0	chr1-70344000:70344150	chr1	70344000	70344150	chr1	70344000	70344150	chr1-70343990:70344366	chr1	70343990	70344366	chr1
chr1	70876084	70877249	0.0926573426573428	0.223098568928308	0.153846153846154	0	0.406477157119965	0.181188147733199	33	0.000144108183113731	HypoHigh	chr1	70875954	70876954	Promoter	+	CTH	protein_coding	chr1	70876084	70876954	0.746781115879828	0.87	CpG: 40	chr1	70876622	70877091	chr1	70876622	70876954	*	*	*	*	*	0	0	chr1-70876325:70876955	chr1	70876325	70876955	chr1	70876325	70876954	chr1-70876930:70877274	chr1	70876930	70877274	chr1
chr1	70876084	70877249	0.0926573426573428	0.223098568928308	0.153846153846154	0	0.406477157119965	0.181188147733199	33	0.000144108183113731	HypoHigh	chr1	70876955	70877266	FirstExon	+	CTH	protein_coding	chr1	70876955	70877249	0.252360515021459	0.945337620578778	CpG: 40	chr1	70876622	70877091	chr1	70876955	70877091	*	*	*	*	*	0	0	chr1-70877040:70877550	chr1	70877040	70877550	chr1	70877040	70877249	chr1-70877124:70877608	chr1	70877124	70877608	chr1
chr1	71615856	71639766	0.068589743589744	-0.23527425288561	0.923076923076923	0.818181818181818	0.279066448837627	0.457704993332341	99	1.49763958800357e-05	HypoLow	chr1	71557388	71688739	Intron2	+	ZRANB2-AS2	processed_transcript	chr1	71615856	71639766	1	0.182031351112668	*	*	*	*	*	0	0	*	*	*	*	*	0	0	chr1-71639745:71639895	chr1	71639745	71639895	chr1	71639745	71639766	chr1-71636742:71636868	chr1	71636742	71636868	chr1
chr1	72577859	72586281	0.0666666666666667	-0.272229696105007	1	0.916666666666667	0.137938950101211	0.38003855950487	32	0.000692590674003359	HypoLow	chr1	72400995	72748001	Intron1	-	NEGR1	protein_coding	chr1	72577859	72586281	1	0.0242704737093883	*	*	*	*	*	0	0	*	*	*	*	*	0	0	chr1-72585280:72585430	chr1	72585280	72585430	chr1	72585280	72585430	chr1-72585125:72585621	chr1	72585125	72585621	chr1
chr1	72726541	72746664	0.068312324929972	-0.20317355737286	0.83974358974359	0.666666666666667	0.328808909576947	0.559120218448317	95	0.00900570075285327	HypoLow	chr1	72400995	72748001	Intron1	-	NEGR1	protein_coding	chr1	72726541	72746664	1	0.0579903517518429	*	*	*	*	*	0	0	*	*	*	*	*	0	0	chr1-72746425:72746675	chr1	72746425	72746675	chr1	72746425	72746664	chr1-72746434:72746755	chr1	72746434	72746755	chr1
chr1	72749148	72751054	0.0690476190476188	0.201862278656903	0.143589743589743	0.0588235294117647	0.436432222745668	0.270426041486378	41	0.00316358831577265	HypoHigh	chr1	72748418	72749418	Promoter	-	NEGR1	protein_coding	chr1	72749148	72749418	0.141657922350472	0.27	CpG: 86	chr1	72748471	72749736	chr1	72749148	72749418	chr1:72749220-72749791	chr1	72749220	72749791	chr1	72749220	72749418	chr1-72748360:72750315	chr1	72748360	72750315	chr1	72749148	72749418	chr1-72749401:72749657	chr1	72749401	72749657	chr1
chr1	74782212	74788435	0.111111111111111	-0.255081164468178	0.909090909090909	0.789473684210526	0.323650198151556	0.546741309647284	36	0.00292474990643082	HypoLow	chr1	74737393	74797133	Intron7	+	FPGT-TNNI3K	protein_coding	chr1	74782212	74788435	1	0.104168061600268	*	*	*	*	*	0	0	*	*	*	*	*	0	0	chr1-74787045:74787195	chr1	74787045	74787195	chr1	74787045	74787195	chr1-74783494:74783616	chr1	74783494	74783616	chr1
chr1	74782212	74788435	0.111111111111111	-0.255081164468178	0.909090909090909	0.789473684210526	0.323650198151556	0.546741309647284	36	0.00292474990643082	HypoLow	chr1	74737393	74797133	Intron5	+	TNNI3K	protein_coding	chr1	74782212	74788435	1	0.104168061600268	*	*	*	*	*	0	0	*	*	*	*	*	0	0	chr1-74787045:74787195	chr1	74787045	74787195	chr1	74787045	74787195	chr1-74783494:74783616	chr1	74783494	74783616	chr1
chr1	75210290	75210855	-0.252100840336135	0.163446963806386	0.5	0.777777777777778	0.486382639009082	0.425871145606372	14	0.000227679172355441	HypoHigh	chr1	75204473	75214434	Intron3	+	TYW3	protein_coding	chr1	75210290	75210855	1	0.0567212127296456	*	*	*	*	*	0	0	*	*	*	*	*	0	0	chr1-75210440:75210615	chr1	75210440	75210615	chr1	75210440	75210615	chr1-75209553:75210396	chr1	75209553	75210396	chr1
chr1	75433601	75439200	0.257575757575758	-0.257062144321564	0.857142857142857	0.545454545454545	0.328409378678084	0.563160755673061	14	0.0308486746995001	HyperLow	*	*	*	InterGenic	*	*	*	*	*	*	*	*	*	*	*	*	*	0	0	chr1:75435312-75435653	chr1	75435312	75435653	chr1	75435312	75435653	chr1-75437780:75437950	chr1	75437780	75437950	chr1	75437780	75437950	chr1-75438964:75439234	chr1	75438964	75439234	chr1
chr1	75544164	75545503	-0.238095238095238	0.200257277304467	0.467261904761904	0.717948717948718	0.654964026429901	0.459101626877594	7	0.0930735930735931	HypoHigh	*	*	*	InterGenic	*	*	*	*	*	*	*	*	*	*	*	*	*	0	0	*	*	*	*	*	0	0	chr1-75545020:75545170	chr1	75545020	75545170	chr1	75545020	75545170	chr1-75545494:75546010	chr1	75545494	75546010	chr1
chr1	75546025	75551302	0.250678733031674	-0.18446560363702	0.826797385620915	0.416666666666667	0.350355034571981	0.519531595432119	23	0.0118842461623844	HyperLow	*	*	*	InterGenic	*	*	*	*	*	*	*	*	*	*	*	*	*	0	0	*	*	*	*	*	0	0	chr1-75549860:75550110	chr1	75549860	75550110	chr1	75549860	75550110	chr1-75551076:75551556	chr1	75551076	75551556	chr1
chr1	75600674	75602924	0.281609195402299	-0.078757151134358	0.764705882352941	0.344827586206897	0.510164352252494	0.574363778941963	62	1.44213347479243e-07	HyperHigh	chr1	75596418	75602287	Intron2	+	LHX8	protein_coding	chr1	75600674	75602287	0.716888888888889	0.274833872891464	CpG: 81	chr1	75601998	75602878	chr1	75601998	75602287	*	*	*	*	*	0	0	chr1-75602225:75602435	chr1	75602225	75602435	chr1	75602225	75602287	chr1-75602285:75602595	chr1	75602285	75602595	chr1
chr1	75600674	75602924	0.281609195402299	-0.078757151134358	0.764705882352941	0.344827586206897	0.510164352252494	0.574363778941963	62	1.44213347479243e-07	HyperHigh	chr1	75602288	75602374	Exon3	+	LHX8	protein_coding	chr1	75602288	75602374	0.0382222222222222	1	CpG: 81	chr1	75601998	75602878	chr1	75602288	75602374	*	*	*	*	*	0	0	chr1-75602225:75602435	chr1	75602225	75602435	chr1	75602288	75602374	chr1-75602285:75602595	chr1	75602285	75602595	chr1
chr1	75600674	75602924	0.281609195402299	-0.078757151134358	0.764705882352941	0.344827586206897	0.510164352252494	0.574363778941963	62	1.44213347479243e-07	HyperHigh	chr1	75602375	75602784	Intron3	+	LHX8	protein_coding	chr1	75602375	75602784	0.181777777777778	1	CpG: 81	chr1	75601998	75602878	chr1	75602375	75602784	*	*	*	*	*	0	0	chr1-75602745:75602970	chr1	75602745	75602970	chr1	75602745	75602784	chr1-75602766:75603136	chr1	75602766	75603136	chr1
chr1	75600674	75602924	0.281609195402299	-0.078757151134358	0.764705882352941	0.344827586206897	0.510164352252494	0.574363778941963	62	1.44213347479243e-07	HyperHigh	chr1	75602785	75602946	Exon4	+	LHX8	protein_coding	chr1	75602785	75602924	0.0617777777777778	0.863354037267081	CpG: 81	chr1	75601998	75602878	chr1	75602785	75602878	*	*	*	*	*	0	0	chr1-75602745:75602970	chr1	75602745	75602970	chr1	75602785	75602924	chr1-75602766:75603136	chr1	75602766	75603136	chr1
chr1	75791443	75804799	0.0976190476190475	-0.206969884546216	0.9	0.766968325791855	0.306098611351497	0.516264980231799	67	0.000727510915904133	HypoLow	chr1	75766371	75805266	Intron4	-	SLC44A5	protein_coding	chr1	75791443	75804799	1	0.343386039336676	*	*	*	*	*	0	0	chr1:75798807-75799079	chr1	75798807	75799079	chr1	75798807	75799079	chr1-75804760:75805035	chr1	75804760	75805035	chr1	75804760	75804799	chr1-75804791:75805111	chr1	75804791	75805111	chr1
chr1	77180877	77190643	0	-0.201842495543515	0.894444444444444	0.854895104895105	0.197224259527442	0.33107112145514	35	0.191064972913615	HypoLow	*	*	*	InterGenic	*	*	*	*	*	*	*	*	*	*	*	*	*	0	0	*	*	*	*	*	0	0	chr1-77189740:77189910	chr1	77189740	77189910	chr1	77189740	77189910	chr1-77190616:77190996	chr1	77190616	77190996	chr1
chr1	77332812	77335029	0.253936122357175	0.155083465357637	0.455555555555555	0.146428571428571	0.640037321490309	0.455135599207355	63	4.0831348416205e-08	HyperHigh	chr1	77332125	77333125	Promoter	+	ST6GALNAC5	protein_coding	chr1	77332812	77333125	0.141181777176364	0.313	CpG: 112	chr1	77333111	77334534	chr1	77333111	77333125	*	*	*	*	*	0	0	chr1-77333000:77333835	chr1	77333000	77333835	chr1	77333000	77333125	chr1-77333103:77333667	chr1	77333103	77333667	chr1
chr1	77332812	77335029	0.253936122357175	0.155083465357637	0.455555555555555	0.146428571428571	0.640037321490309	0.455135599207355	63	4.0831348416205e-08	HyperHigh	chr1	77333126	77333375	FirstExon	+	ST6GALNAC5	protein_coding	chr1	77333126	77333375	0.112313937753721	1	CpG: 112	chr1	77333111	77334534	chr1	77333126	77333375	*	*	*	*	*	0	0	chr1-77333000:77333835	chr1	77333000	77333835	chr1	77333126	77333375	chr1-77333200:77333844	chr1	77333200	77333844	chr1
chr1	77332812	77335029	0.253936122357175	0.155083465357637	0.455555555555555	0.146428571428571	0.640037321490309	0.455135599207355	63	4.0831348416205e-08	HyperHigh	chr1	77333376	77334181	Intron1	+	ST6GALNAC5	protein_coding	chr1	77333376	77334181	0.363103292737934	1	CpG: 112	chr1	77333111	77334534	chr1	77333376	77334181	*	*	*	*	*	0	0	chr1-77333860:77334550	chr1	77333860	77334550	chr1	77333860	77334181	chr1-77334164:77334548	chr1	77334164	77334548	chr1
chr1	77332812	77335029	0.253936122357175	0.155083465357637	0.455555555555555	0.146428571428571	0.640037321490309	0.455135599207355	63	4.0831348416205e-08	HyperHigh	chr1	77334182	77334427	Exon2	+	ST6GALNAC5	protein_coding	chr1	77334182	77334427	0.110509697789806	1	CpG: 112	chr1	77333111	77334534	chr1	77334182	77334427	*	*	*	*	*	0	0	chr1-77333860:77334550	chr1	77333860	77334550	chr1	77334182	77334427	chr1-77334198:77334531	chr1	77334198	77334531	chr1
chr1	77332812	77335029	0.253936122357175	0.155083465357637	0.455555555555555	0.146428571428571	0.640037321490309	0.455135599207355	63	4.0831348416205e-08	HyperHigh	chr1	77334428	77509888	Intron2	+	ST6GALNAC5	protein_coding	chr1	77334428	77335029	0.271087054578259	0.0034252821155819	CpG: 112	chr1	77333111	77334534	chr1	77334428	77334534	*	*	*	*	*	0	0	chr1-77334685:77335075	chr1	77334685	77335075	chr1	77334685	77335029	chr1-77334713:77335025	chr1	77334713	77335025	chr1
chr1	77409965	77415477	0.095238095238095	-0.240642698295787	0.9	0.818181818181818	0.240642698295787	0.466527076882021	34	0.00900298466108497	HypoLow	chr1	77334428	77509888	Intron2	+	ST6GALNAC5	protein_coding	chr1	77409965	77415477	1	0.0314145674227744	*	*	*	*	*	0	0	*	*	*	*	*	0	0	chr1-77415245:77415475	chr1	77415245	77415475	chr1	77415245	77415475	chr1-77415374:77415854	chr1	77415374	77415854	chr1
chr1	81111909	81115529	-0.145712560386474	0.212534859675108	0.570261437908496	0.854895104895105	0.55725973927632	0.424900942705027	13	0.139137461869483	HypoHigh	chr1	81110039	81112247	Intron3	+	RP5-887A10.1	lincRNA	chr1	81111909	81112247	0.0933701657458564	0.153079710144928	*	*	*	*	*	0	0	*	*	*	*	*	0	0	*	*	*	*	*	0	0	chr1-81111737:81112181	chr1	81111737	81112181	chr1
chr1	81111909	81115529	-0.145712560386474	0.212534859675108	0.570261437908496	0.854895104895105	0.55725973927632	0.424900942705027	13	0.139137461869483	HypoHigh	chr1	81112248	81112473	LastExon	+	RP5-887A10.1	lincRNA	chr1	81112248	81112473	0.0621546961325967	1	*	*	*	*	*	0	0	*	*	*	*	*	0	0	*	*	*	*	*	0	0	chr1-81111693:81112253	chr1	81111693	81112253	chr1
chr1	81569291	81570781	0.106442577030812	-0.429038170603153	1	0.818014705882353	0.228658419422619	0.563278470232042	13	0.0082860774783283	HypoLow	*	*	*	InterGenic	*	*	*	*	*	*	*	*	*	*	*	*	*	0	0	*	*	*	*	*	0	0	*	*	*	*	*	0	0	*	*	*	*	*
chr1	81994237	82002325	0.1	-0.283325859450549	0.9375	0.8125	0.270426041486378	0.5	52	0.000121535755341766	HypoLow	chr1	81910775	82046560	Intron2	+	LPHN2	protein_coding	chr1	81994237	82002325	1	0.0595647531023309	*	*	*	*	*	0	0	*	*	*	*	*	0	0	chr1-81994825:81995095	chr1	81994825	81995095	chr1	81994825	81995095	chr1-82001573:82001813	chr1	82001573	82001813	chr1
chr1	81994237	82002325	0.1	-0.283325859450549	0.9375	0.8125	0.270426041486378	0.5	52	0.000121535755341766	HypoLow	chr1	81980881	82023348	Intron1	-	RP5-837I24.2	antisense	chr1	81994237	82002325	1	0.190453764099183	*	*	*	*	*	0	0	*	*	*	*	*	0	0	chr1-81994825:81995095	chr1	81994825	81995095	chr1	81994825	81995095	chr1-82001573:82001813	chr1	82001573	82001813	chr1
chr1	82161397	82162414	-0.0625	0.2139895654856	0.935416666666667	1	0.288262326418938	0.15633186452976	19	0.115697592022116	HypoHigh	chr1	82046666	82227495	Intron3	+	LPHN2	protein_coding	chr1	82161397	82162414	1	0.00562409790465025	*	*	*	*	*	0	0	*	*	*	*	*	0	0	chr1-82161920:82162150	chr1	82161920	82162150	chr1	82161920	82162150	chr1-82161531:82161927	chr1	82161531	82161927	chr1
chr1	82162641	82165325	0.171804511278196	-0.232797766621516	0.954545454545454	0.757142857142857	0.243550091017914	0.5	11	0.0347201974258921	HypoLow	chr1	82046666	82227495	Intron3	+	LPHN2	protein_coding	chr1	82162641	82165325	1	0.0148427519922136	*	*	*	*	*	0	0	*	*	*	*	*	0	0	chr1-82164960:82165230	chr1	82164960	82165230	chr1	82164960	82165230	chr1-82164977:82165217	chr1	82164977	82165217	chr1
chr1	82265944	82269182	0.2	0.240642698295787	0.307692307692308	0.0555555555555556	0.594719709283807	0.294727906593063	102	3.50250673490691e-13	-	chr1	82227538	82302569	Intron4	+	LPHN2	protein_coding	chr1	82265944	82269182	1	0.0431554957284322	CpG: 274	chr1	82265998	82269048	chr1	82265998	82269048	chr1:82268420-82269588	chr1	82268420	82269588	chr1	82268420	82269182	chr1-82268960:82269855	chr1	82268960	82269855	chr1	82268960	82269182	chr1-82268841:82269061	chr1	82268841	82269061	chr1
chr1	82720147	82723362	0.111111111111111	-0.270426041486378	1	0.818181818181818	0.216674140549451	0.461477168113533	20	0.00321030256745152	HypoLow	chr1	82681457	82726699	Intron1	-	RP11-147G16.1	lincRNA	chr1	82720147	82723362	1	0.0710622872552053	*	*	*	*	*	0	0	*	*	*	*	*	0	0	*	*	*	*	*	0	0	*	*	*	*	*
chr1	83142903	83163216	0.08	-0.249789071324682	1	0.882352941176471	0	0.350033119915121	109	1.64101137203366e-12	HypoLow	*	*	*	InterGenic	*	*	*	*	*	*	*	*	*	*	*	*	*	0	0	chr1:83153203-83153587	chr1	83153203	83153587	chr1	83153203	83153587	chr1-83161005:83161450	chr1	83161005	83161450	chr1	83161005	83161450	chr1-83161107:83161552	chr1	83161107	83161552	chr1
chr1	83175553	83190543	0.08695652173913	-0.24484330714649	1	0.857142857142857	0	0.363076692947528	46	3.00444609539415e-07	HypoLow	*	*	*	InterGenic	*	*	*	*	*	*	*	*	*	*	*	*	*	0	0	*	*	*	*	*	0	0	chr1-83188380:83188610	chr1	83188380	83188610	chr1	83188380	83188610	chr1-83188563:83188939	chr1	83188563	83188939	chr1
chr1	83231707	83238863	0.0675983436853	-0.275187055710578	0.944444444444444	0.88562091503268	0.142218972870857	0.4566580250915	37	2.63782680644251e-05	HypoLow	*	*	*	InterGenic	*	*	*	*	*	*	*	*	*	*	*	*	*	0	0	*	*	*	*	*	0	0	chr1-83238165:83238315	chr1	83238165	83238315	chr1	83238165	83238315	chr1-83235317:83235707	chr1	83235317	83235707	chr1
chr1	83243975	83252961	0.052631578947368	-0.244682997873173	1	0.882352941176471	0.181188147733199	0.425871145606372	34	0.0059354759622211	HypoLow	*	*	*	InterGenic	*	*	*	*	*	*	*	*	*	*	*	*	*	0	0	*	*	*	*	*	0	0	chr1-83251160:83251390	chr1	83251160	83251390	chr1	83251160	83251390	chr1-83251079:83251335	chr1	83251079	83251335	chr1
chr1	84627246	84630599	-0.0979214340198324	0.315479781557005	0.869318181818182	1	0.417001313704183	0	23	0.000835485479121036	HypoHigh	chr1	84544055	84644859	Intron1	+	PRKACB	protein_coding	chr1	84627246	84630599	1	0.0332625689456768	*	*	*	*	*	0	0	*	*	*	*	*	0	0	chr1-84630540:84630730	chr1	84630540	84630730	chr1	84630540	84630599	chr1-84630206:84630556	chr1	84630206	84630556	chr1
chr1	85248344	85254915	0.073221247563353	-0.228491765742445	1	0.894444444444444	0.167752778258549	0.426380927723334	55	2.02242701593104e-06	HypoLow	*	*	*	InterGenic	*	*	*	*	*	*	*	*	*	*	*	*	*	0	0	chr1:85248638-85248992	chr1	85248638	85248992	chr1	85248638	85248992	chr1-85250905:85251230	chr1	85250905	85251230	chr1	85250905	85251230	chr1-85253721:85254101	chr1	85253721	85254101	chr1
chr1	85358375	85359289	0.227884615384615	0.207349561563602	0.408333333333334	0.0611111111111111	0.527144630190561	0.339147049074952	35	0.00032419670283981	HyperHigh	*	*	*	InterGenic	*	*	*	*	*	*	*	*	CpG: 89	chr1	85358359	85359187	chr1	85358375	85359187	*	*	*	*	*	0	0	chr1-85358060:85359375	chr1	85358060	85359375	chr1	85358375	85359289	chr1-85359102:85359452	chr1	85359102	85359452	chr1
chr1	85531635	85544093	0.085512494471473	-0.212468722798046	1	0.868115942028985	0.181188147733199	0.385593216482346	89	1.4200416637813e-09	HypoLow	chr1	85465022	85537610	Intron1	+	WDR63	protein_coding	chr1	85531635	85537610	0.47961149462193	0.0823138810822726	*	*	*	*	*	0	0	*	*	*	*	*	0	0	chr1-85537225:85537375	chr1	85537225	85537375	chr1	85537225	85537375	chr1-85536804:85536932	chr1	85536804	85536932	chr1
chr1	85531635	85544093	0.085512494471473	-0.212468722798046	1	0.868115942028985	0.181188147733199	0.385593216482346	89	1.4200416637813e-09	HypoLow	chr1	85537611	85537688	Exon2	+	WDR63	protein_coding	chr1	85537611	85537688	0.00618076737839139	1	*	*	*	*	*	0	0	*	*	*	*	*	0	0	*	*	*	*	*	0	0	*	*	*	*	*
chr1	85531635	85544093	0.085512494471473	-0.212468722798046	1	0.868115942028985	0.181188147733199	0.385593216482346	89	1.4200416637813e-09	HypoLow	chr1	85537689	85538736	Intron2	+	WDR63	protein_coding	chr1	85537689	85538736	0.0840423824048804	1	*	*	*	*	*	0	0	*	*	*	*	*	0	0	chr1-85538685:85538835	chr1	85538685	85538835	chr1	85538685	85538736	*	*	*	*	*
chr1	85531635	85544093	0.085512494471473	-0.212468722798046	1	0.868115942028985	0.181188147733199	0.385593216482346	89	1.4200416637813e-09	HypoLow	chr1	85538737	85538775	Exon3	+	WDR63	protein_coding	chr1	85538737	85538775	0.00305024883608926	1	*	*	*	*	*	0	0	*	*	*	*	*	0	0	chr1-85538685:85538835	chr1	85538685	85538835	chr1	85538737	85538775	*	*	*	*	*
chr1	85531635	85544093	0.085512494471473	-0.212468722798046	1	0.868115942028985	0.181188147733199	0.385593216482346	89	1.4200416637813e-09	HypoLow	chr1	85538776	85546916	Intron3	+	WDR63	protein_coding	chr1	85538776	85544093	0.426794027933858	0.653194103194103	*	*	*	*	*	0	0	*	*	*	*	*	0	0	chr1-85543105:85543255	chr1	85543105	85543255	chr1	85543105	85543255	chr1-85540131:85540371	chr1	85540131	85540371	chr1
chr1	85572627	85583459	0.066666666666667	-0.2375835839156	0.960769230769231	0.866666666666667	0.134176735655481	0.33107112145514	67	1.34235355908467e-07	HypoLow	chr1	85570281	85573715	Intron13	+	WDR63	protein_coding	chr1	85572627	85573715	0.100443131462334	0.316831683168317	*	*	*	*	*	0	0	*	*	*	*	*	0	0	chr1-85572805:85572955	chr1	85572805	85572955	chr1	85572805	85572955	*	*	*	*	*
chr1	85572627	85583459	0.066666666666667	-0.2375835839156	0.960769230769231	0.866666666666667	0.134176735655481	0.33107112145514	67	1.34235355908467e-07	HypoLow	chr1	85573716	85573860	Exon14	+	WDR63	protein_coding	chr1	85573716	85573860	0.0132939438700148	1	*	*	*	*	*	0	0	*	*	*	*	*	0	0	*	*	*	*	*	0	0	chr1-85573805:85574085	chr1	85573805	85574085	chr1
chr1	85572627	85583459	0.066666666666667	-0.2375835839156	0.960769230769231	0.866666666666667	0.134176735655481	0.33107112145514	67	1.34235355908467e-07	HypoLow	chr1	85573861	85575730	Intron14	+	WDR63	protein_coding	chr1	85573861	85575730	0.172544313146233	1	*	*	*	*	*	0	0	*	*	*	*	*	0	0	chr1-85575165:85575410	chr1	85575165	85575410	chr1	85575165	85575410	chr1-85575152:85575582	chr1	85575152	85575582	chr1
chr1	85572627	85583459	0.066666666666667	-0.2375835839156	0.960769230769231	0.866666666666667	0.134176735655481	0.33107112145514	67	1.34235355908467e-07	HypoLow	chr1	85575731	85575818	Exon15	+	WDR63	protein_coding	chr1	85575731	85575818	0.00803175775480059	1	*	*	*	*	*	0	0	*	*	*	*	*	0	0	*	*	*	*	*	0	0	chr1-85575808:85576036	chr1	85575808	85576036	chr1
chr1	85572627	85583459	0.066666666666667	-0.2375835839156	0.960769230769231	0.866666666666667	0.134176735655481	0.33107112145514	67	1.34235355908467e-07	HypoLow	chr1	85575819	85583411	Intron15	+	WDR63	protein_coding	chr1	85575819	85583411	0.700886262924668	1	*	*	*	*	*	0	0	*	*	*	*	*	0	0	chr1-85582620:85582850	chr1	85582620	85582850	chr1	85582620	85582850	chr1-85582621:85582861	chr1	85582621	85582861	chr1
chr1	85572627	85583459	0.066666666666667	-0.2375835839156	0.960769230769231	0.866666666666667	0.134176735655481	0.33107112145514	67	1.34235355908467e-07	HypoLow	chr1	85583412	85583542	Exon16	+	WDR63	protein_coding	chr1	85583412	85583459	0.00433899556868538	0.361538461538462	*	*	*	*	*	0	0	*	*	*	*	*	0	0	*	*	*	*	*	0	0	*	*	*	*	*
chr1	86081442	86082051	0.111111111111111	-0.25631875404301	1	0.866666666666667	0.176802025943535	0.362076448744198	14	0.0102740900059411	HypoLow	*	*	*	InterGenic	*	*	*	*	*	*	*	*	CpG: 47	chr1	86081700	86082068	chr1	86081700	86082051	*	*	*	*	*	0	0	chr1-86081905:86082075	chr1	86081905	86082075	chr1	86081905	86082051	chr1-86081209:86081639	chr1	86081209	86081639	chr1
chr1	86525354	86545309	0.097435897435898	-0.236445955786468	0.947368421052632	0.857142857142857	0.181188147733199	0.452259883149013	90	6.25887587448769e-10	HypoLow	chr1	86524858	86529397	Intron8	-	COL24A1	protein_coding	chr1	86525354	86529397	0.202605863192182	0.890724829257546	*	*	*	*	*	0	0	chr1:86527312-86527621	chr1	86527312	86527621	chr1	86527312	86527621	chr1-86528180:86528390	chr1	86528180	86528390	chr1	86528180	86528390	chr1-86527485:86527715	chr1	86527485	86527715	chr1
chr1	86525354	86545309	0.097435897435898	-0.236445955786468	0.947368421052632	0.857142857142857	0.181188147733199	0.452259883149013	90	6.25887587448769e-10	HypoLow	chr1	86529398	86529442	Exon8	-	COL24A1	protein_coding	chr1	86529398	86529442	0.00220496116261589	1	*	*	*	*	*	0	0	*	*	*	*	*	0	0	*	*	*	*	*	0	0	*	*	*	*	*
chr1	86525354	86545309	0.097435897435898	-0.236445955786468	0.947368421052632	0.857142857142857	0.181188147733199	0.452259883149013	90	6.25887587448769e-10	HypoLow	chr1	86529443	86554856	Intron7	-	COL24A1	protein_coding	chr1	86529443	86545309	0.79508895013781	0.624326132294495	*	*	*	*	*	0	0	*	*	*	*	*	0	0	chr1-86543720:86543870	chr1	86543720	86543870	chr1	86543720	86543870	chr1-86543600:86544027	chr1	86543600	86544027	chr1
chr1	86968570	86970111	0.313636363636364	-0.071865410119201	0.666666666666667	0.368421052631579	0.552580908834963	0.575798891191493	30	1.73031600461437e-06	HyperHigh	*	*	*	InterGenic	*	*	*	*	*	*	*	*	*	*	*	*	*	0	0	chr1:86968505-86968764	chr1	86968505	86968764	chr1	86968570	86968764	chr1-86969540:86970050	chr1	86969540	86970050	chr1	86969540	86970050	chr1-86969891:86970147	chr1	86969891	86970147	chr1
chr1	88343864	88346165	-0.0660552897395005	0.251008175963631	0.833333333333333	0.957427536231884	0.478491765742445	0.198931144141325	13	0.00414878675477294	HypoHigh	*	*	*	InterGenic	*	*	*	*	*	*	*	*	*	*	*	*	*	0	0	*	*	*	*	*	0	0	chr1-88346100:88346330	chr1	88346100	88346330	chr1	88346100	88346165	chr1-88345441:88345801	chr1	88345441	88345801	chr1
chr1	88928246	88928742	0.392100492100492	-0.0696468519287095	0.732142857142857	0.238325281803543	0.449707639169339	0.539241395609188	15	0.00471083919199098	HyperHigh	*	*	*	InterGenic	*	*	*	*	*	*	*	*	CpG: 50	chr1	88928283	88928760	chr1	88928283	88928742	*	*	*	*	*	0	0	chr1-88928200:88929075	chr1	88928200	88929075	chr1	88928246	88928742	chr1-88928483:88928680	chr1	88928483	88928680	chr1
chr1	89482403	89484827	0.123188405797101	-0.281233798980032	0.928205128205128	0.849624060150376	0.174470462995874	0.495123955102091	19	0.00358864962960703	HypoLow	chr1	89481098	89486214	Intron2	-	GBP3	protein_coding	chr1	89482403	89484827	1	0.473807662236122	*	*	*	*	*	0	0	*	*	*	*	*	0	0	chr1-89484040:89484290	chr1	89484040	89484290	chr1	89484040	89484290	chr1-89484055:89484325	chr1	89484055	89484325	chr1
chr1	90446129	90449573	0.088095238095238	-0.223522019649608	0.964285714285714	0.878676470588236	0.142218972870857	0.355785975005421	37	7.67345159604204e-05	HypoLow	*	*	*	InterGenic	*	*	*	*	*	*	*	*	*	*	*	*	*	0	0	*	*	*	*	*	0	0	chr1-90449225:90449435	chr1	90449225	90449435	chr1	90449225	90449435	chr1-90449515:90449998	chr1	90449515	90449998	chr1
chr1	91118427	91121293	0.0833333333333335	-0.249083543001756	1	0.842424242424243	0.240642698295787	0.482938545241728	23	0.00545103015800346	HypoLow	*	*	*	InterGenic	*	*	*	*	*	*	*	*	*	*	*	*	*	0	0	*	*	*	*	*	0	0	*	*	*	*	*	0	0	*	*	*	*	*
chr1	91170156	91172531	0.282828282828283	-0.068717542523954	0.642857142857143	0.260869565217391	0.45698353148489	0.520426041486377	38	0.000355863684169338	HyperHigh	*	*	*	InterGenic	*	*	*	*	*	*	*	*	CpG: 67	chr1	91172102	91172771	chr1	91172102	91172531	*	*	*	*	*	0	0	chr1-91172180:91172935	chr1	91172180	91172935	chr1	91172180	91172531	chr1-91172520:91172790	chr1	91172520	91172790	chr1
chr1	91181963	91185976	0.262202380952381	0.015392768056917	0.666666666666667	0.242647058823529	0.545400036684901	0.538000292440541	119	3.87465489746968e-13	HyperHigh	chr1	91180314	91182127	Intron1	-	BARHL2	protein_coding	chr1	91181963	91182127	0.0408671816596063	0.090457804743519	CpG: 20	chr1	91182097	91182364	chr1	91182097	91182127	*	*	*	*	*	0	0	chr1-91181625:91182315	chr1	91181625	91182315	chr1	91181963	91182127	chr1-91181985:91182275	chr1	91181985	91182275	chr1
chr1	91181963	91185976	0.262202380952381	0.015392768056917	0.666666666666667	0.242647058823529	0.545400036684901	0.538000292440541	119	3.87465489746968e-13	HyperHigh	chr1	91182128	91182794	FirstExon	-	BARHL2	protein_coding	chr1	91182128	91182794	0.165960627959133	1	CpG: 26	chr1	91182509	91182857	chr1	91182509	91182794	*	*	*	*	*	0	0	chr1-91182325:91182955	chr1	91182325	91182955	chr1	91182325	91182794	chr1-91182576:91183056	chr1	91182576	91183056	chr1
chr1	91181963	91185976	0.262202380952381	0.015392768056917	0.666666666666667	0.242647058823529	0.545400036684901	0.538000292440541	119	3.87465489746968e-13	HyperHigh	chr1	91182795	91183795	Promoter	-	BARHL2	protein_coding	chr1	91182795	91183795	0.24919013207077	1	CpG: 124	chr1	91183240	91184540	chr1	91183240	91183795	chr1:91183313-91183764	chr1	91183313	91183764	chr1	91183313	91183764	chr1-91183065:91184690	chr1	91183065	91184690	chr1	91183065	91183795	chr1-91183658:91186314	chr1	91183658	91186314	chr1
chr1	91315174	91317881	0.0866596638655463	0.206213276059904	0.16025641025641	0.0526315789473684	0.399456596961568	0.178294640221425	59	5.08721129148126e-05	HypoHigh	chr1	91297754	91317039	Intron1	-	RP4-665J23.1	lincRNA	chr1	91315174	91317039	0.688954562246029	0.0967072854550168	CpG: 106	chr1	91316249	91317390	chr1	91316249	91317039	*	*	*	*	*	0	0	chr1-91316020:91317035	chr1	91316020	91317035	chr1	91316020	91317035	chr1-91317027:91317210	chr1	91317027	91317210	chr1
chr1	91315174	91317881	0.0866596638655463	0.206213276059904	0.16025641025641	0.0526315789473684	0.399456596961568	0.178294640221425	59	5.08721129148126e-05	HypoHigh	chr1	91317040	91317072	FirstExon	-	RP4-665J23.1	lincRNA	chr1	91317040	91317072	0.0118212042851866	1	CpG: 106	chr1	91316249	91317390	chr1	91317040	91317072	*	*	*	*	*	0	0	chr1-91317045:91317355	chr1	91317045	91317355	chr1	91317045	91317072	chr1-91317042:91318347	chr1	91317042	91318347	chr1
chr1	91315174	91317881	0.0866596638655463	0.206213276059904	0.16025641025641	0.0526315789473684	0.399456596961568	0.178294640221425	59	5.08721129148126e-05	HypoHigh	chr1	91317073	91318073	Promoter	-	RP4-665J23.1	lincRNA	chr1	91317073	91317881	0.29848540820096	0.808	CpG: 106	chr1	91316249	91317390	chr1	91317073	91317390	*	*	*	*	*	0	0	chr1-91317440:91317670	chr1	91317440	91317670	chr1	91317440	91317670	chr1-91317571:91317971	chr1	91317571	91317971	chr1
chr1	91315174	91317881	0.0866596638655463	0.206213276059904	0.16025641025641	0.0526315789473684	0.399456596961568	0.178294640221425	59	5.08721129148126e-05	HypoHigh	chr1	91316315	91317315	Promoter	+	RP4-665J23.2	lincRNA	chr1	91316315	91317315	0.36941263391208	1	CpG: 106	chr1	91316249	91317390	chr1	91316315	91317315	*	*	*	*	*	0	0	chr1-91317045:91317355	chr1	91317045	91317355	chr1	91317045	91317315	chr1-91317137:91317289	chr1	91317137	91317289	chr1
chr1	91315174	91317881	0.0866596638655463	0.206213276059904	0.16025641025641	0.0526315789473684	0.399456596961568	0.178294640221425	59	5.08721129148126e-05	HypoHigh	chr1	91317316	91317836	FirstExon	+	RP4-665J23.2	lincRNA	chr1	91317316	91317836	0.192094569634281	1	CpG: 106	chr1	91316249	91317390	chr1	91317316	91317390	*	*	*	*	*	0	0	chr1-91317440:91317670	chr1	91317440	91317670	chr1	91317440	91317670	chr1-91317571:91317971	chr1	91317571	91317971	chr1
chr1	91315174	91317881	0.0866596638655463	0.206213276059904	0.16025641025641	0.0526315789473684	0.399456596961568	0.178294640221425	59	5.08721129148126e-05	HypoHigh	chr1	91317837	91319784	Intron1	+	RP4-665J23.2	lincRNA	chr1	91317837	91317881	0.0162541558921315	0.0225988700564972	*	*	*	*	*	0	0	*	*	*	*	*	0	0	*	*	*	*	*	0	0	chr1-91317571:91317971	chr1	91317571	91317971	chr1
chr1	91869792	91870412	0.0625	0.240642698295787	0.0666666666666667	0	0.281783645540812	0	24	0.00111070280065683	HypoHigh	chr1	91866667	91870354	Intron1	-	HFM1	protein_coding	chr1	91869792	91870354	0.906451612903226	0.152427447789531	CpG: 62	chr1	91869876	91870390	chr1	91869876	91870354	*	*	*	*	*	0	0	chr1-91870265:91870530	chr1	91870265	91870530	chr1	91870265	91870354	chr1-91870335:91870795	chr1	91870335	91870795	chr1
chr1	91869792	91870412	0.0625	0.240642698295787	0.0666666666666667	0	0.281783645540812	0	24	0.00111070280065683	HypoHigh	chr1	91870355	91870426	FirstExon	-	HFM1	protein_coding	chr1	91870355	91870412	0.0919354838709677	0.802816901408451	CpG: 62	chr1	91869876	91870390	chr1	91870355	91870390	*	*	*	*	*	0	0	chr1-91870265:91870530	chr1	91870265	91870530	chr1	91870355	91870412	chr1-91870411:91870847	chr1	91870411	91870847	chr1
chr1	92926907	92927860	-0.107142857142857	0.25538462338683	0.470588235294118	0.857142857142857	0.523650198151556	0.41355684389223	8	0.140843743351186	HypoHigh	*	*	*	InterGenic	*	*	*	*	*	*	*	*	*	*	*	*	*	0	0	*	*	*	*	*	0	0	chr1-92927320:92927635	chr1	92927320	92927635	chr1	92927320	92927635	chr1-92927401:92927691	chr1	92927401	92927691	chr1
chr1	92947704	92948738	0.537343783667313	0.161766002786443	0.757352941176471	0.0871212121212121	0.42154043403449	0.290696490496598	35	1.05231881106311e-09	HyperHigh	chr1	92946646	92948420	Intron3	-	GFI1	protein_coding	chr1	92947704	92948420	0.692456479690522	0.403607666290868	CpG: 491	chr1	92945907	92952609	chr1	92947704	92948420	chr1:92947789-92948106	chr1	92947789	92948106	chr1	92947789	92948106	chr1-92946345:92949015	chr1	92946345	92949015	chr1	92947704	92948420	chr1-92948296:92949696	chr1	92948296	92949696	chr1
chr1	92947704	92948738	0.537343783667313	0.161766002786443	0.757352941176471	0.0871212121212121	0.42154043403449	0.290696490496598	35	1.05231881106311e-09	HyperHigh	chr1	92948421	92948603	Exon3	-	GFI1	protein_coding	chr1	92948421	92948603	0.176015473887814	1	CpG: 491	chr1	92945907	92952609	chr1	92948421	92948603	*	*	*	*	*	0	0	chr1-92946345:92949015	chr1	92946345	92949015	chr1	92948421	92948603	chr1-92948296:92949696	chr1	92948296	92949696	chr1
chr1	92947704	92948738	0.537343783667313	0.161766002786443	0.757352941176471	0.0871212121212121	0.42154043403449	0.290696490496598	35	1.05231881106311e-09	HyperHigh	chr1	92948604	92948929	Intron2	-	GFI1	protein_coding	chr1	92948604	92948738	0.129593810444874	0.412307692307692	CpG: 491	chr1	92945907	92952609	chr1	92948604	92948738	*	*	*	*	*	0	0	chr1-92946345:92949015	chr1	92946345	92949015	chr1	92948604	92948738	chr1-92948736:92949072	chr1	92948736	92949072	chr1
chr1	94146363	94147530	0.073593073593074	0.215244222413141	0.2	0.0476190476190476	0.432931646898466	0.278115674361751	36	0.0184077815660558	HypoHigh	chr1	94140498	94171647	Intron3	-	BCAR3	protein_coding	chr1	94146363	94147530	1	0.0374650871617066	CpG: 116	chr1	94146321	94147504	chr1	94146363	94147504	*	*	*	*	*	0	0	chr1-94147245:94147815	chr1	94147245	94147815	chr1	94147245	94147530	chr1-94147528:94147838	chr1	94147528	94147838	chr1
chr1	94702500	94703701	0.0909090909090909	0.209874722659607	0.210526315789474	0.0416666666666667	0.43810682890206	0.197224259527442	30	0.00277321314295969	HypoHigh	chr1	94697200	94702970	Intron1	-	ARHGAP29	protein_coding	chr1	94702500	94702970	0.391340549542048	0.0814558058925477	CpG: 73	chr1	94702690	94703344	chr1	94702690	94702970	*	*	*	*	*	0	0	chr1-94702365:94703575	chr1	94702365	94703575	chr1	94702500	94702970	chr1-94702968:94703418	chr1	94702968	94703418	chr1
chr1	94702500	94703701	0.0909090909090909	0.209874722659607	0.210526315789474	0.0416666666666667	0.43810682890206	0.197224259527442	30	0.00277321314295969	HypoHigh	chr1	94702971	94703121	FirstExon	-	ARHGAP29	protein_coding	chr1	94702971	94703121	0.124895920066611	1	CpG: 73	chr1	94702690	94703344	chr1	94702971	94703121	*	*	*	*	*	0	0	chr1-94702365:94703575	chr1	94702365	94703575	chr1	94702971	94703121	chr1-94703118:94703597	chr1	94703118	94703597	chr1
chr1	94702500	94703701	0.0909090909090909	0.209874722659607	0.210526315789474	0.0416666666666667	0.43810682890206	0.197224259527442	30	0.00277321314295969	HypoHigh	chr1	94703122	94704122	Promoter	-	ARHGAP29	protein_coding	chr1	94703122	94703701	0.482098251457119	0.579	CpG: 73	chr1	94702690	94703344	chr1	94703122	94703344	*	*	*	*	*	0	0	chr1-94702365:94703575	chr1	94702365	94703575	chr1	94703122	94703575	chr1-94703414:94703834	chr1	94703414	94703834	chr1
chr1	95392258	95393175	0.0714285714285714	0.212992863088909	0.169540229885058	0.0392307692307692	0.476986230586075	0.254034673318938	35	0.0246342794018491	HypoHigh	chr1	95369081	95392393	Intron1	-	CNN3	protein_coding	chr1	95392258	95392393	0.14721919302072	0.00579100892244338	CpG: 137	chr1	95391837	95393116	chr1	95392258	95392393	*	*	*	*	*	0	0	chr1-95391620:95392450	chr1	95391620	95392450	chr1	95392258	95392393	chr1-95392374:95392698	chr1	95392374	95392698	chr1
chr1	95392258	95393175	0.0714285714285714	0.212992863088909	0.169540229885058	0.0392307692307692	0.476986230586075	0.254034673318938	35	0.0246342794018491	HypoHigh	chr1	95392394	95392834	FirstExon	-	CNN3	protein_coding	chr1	95392394	95392834	0.479825517993457	1	CpG: 137	chr1	95391837	95393116	chr1	95392394	95392834	*	*	*	*	*	0	0	chr1-95392560:95392975	chr1	95392560	95392975	chr1	95392560	95392834	chr1-95392796:95393643	chr1	95392796	95393643	chr1
chr1	95392258	95393175	0.0714285714285714	0.212992863088909	0.169540229885058	0.0392307692307692	0.476986230586075	0.254034673318938	35	0.0246342794018491	HypoHigh	chr1	95392835	95393835	Promoter	-	CNN3	protein_coding	chr1	95392835	95393175	0.370774263904035	0.34	CpG: 137	chr1	95391837	95393116	chr1	95392835	95393116	*	*	*	*	*	0	0	chr1-95393065:95393555	chr1	95393065	95393555	chr1	95393065	95393175	chr1-95393131:95393655	chr1	95393131	95393655	chr1
chr1	95392258	95393175	0.0714285714285714	0.212992863088909	0.169540229885058	0.0392307692307692	0.476986230586075	0.254034673318938	35	0.0246342794018491	HypoHigh	chr1	95392121	95393121	Promoter	+	RP4-639F20.1	antisense	chr1	95392258	95393121	0.941112322791712	0.863	CpG: 137	chr1	95391837	95393116	chr1	95392258	95393116	*	*	*	*	*	0	0	chr1-95393065:95393555	chr1	95393065	95393555	chr1	95393065	95393121	chr1-95393111:95393404	chr1	95393111	95393404	chr1
chr1	95392258	95393175	0.0714285714285714	0.212992863088909	0.169540229885058	0.0392307692307692	0.476986230586075	0.254034673318938	35	0.0246342794018491	HypoHigh	chr1	95393122	95393181	FirstExon	+	RP4-639F20.1	antisense	chr1	95393122	95393175	0.0577971646673937	0.898305084745763	*	*	*	*	*	0	0	*	*	*	*	*	0	0	chr1-95393065:95393555	chr1	95393065	95393555	chr1	95393122	95393175	chr1-95393131:95393655	chr1	95393131	95393655	chr1
chr1	96577631	96589852	0.101948051948052	-0.208604825353185	0.9	0.757352941176471	0.306098611351497	0.545189678275229	43	0.00515709970989608	HypoLow	*	*	*	InterGenic	*	*	*	*	*	*	*	*	*	*	*	*	*	0	0	*	*	*	*	*	0	0	chr1-96582340:96582550	chr1	96582340	96582550	chr1	96582340	96582550	chr1-96585778:96585903	chr1	96585778	96585903	chr1
chr1	97444579	97454686	0.0930735930735935	-0.243390046862425	0.945906432748538	0.82843137254902	0.271327868795692	0.491396793946429	61	3.5744727143452e-06	HypoLow	*	*	*	InterGenic	*	*	*	*	*	*	*	*	*	*	*	*	*	0	0	*	*	*	*	*	0	0	chr1-97452800:97453070	chr1	97452800	97453070	chr1	97452800	97453070	chr1-97453915:97454191	chr1	97453915	97454191	chr1
chr1	97880037	97901852	0.079365079365079	-0.222854814399865	1	0.904761904761905	0	0.317331360636261	84	5.27399659360365e-12	HypoLow	chr1	97848018	97915614	Intron14	-	DPYD	protein_coding	chr1	97880037	97901852	1	0.32272619681638	*	*	*	*	*	0	0	chr1:97890575-97890709	chr1	97890575	97890709	chr1	97890575	97890709	chr1-97901600:97901750	chr1	97901600	97901750	chr1	97901600	97901750	chr1-97900347:97900623	chr1	97900347	97900623	chr1
chr1	97880037	97901852	0.079365079365079	-0.222854814399865	1	0.904761904761905	0	0.317331360636261	84	5.27399659360365e-12	HypoLow	chr1	97859976	97885562	Intron1	-	DPYD-IT1	sense_intronic	chr1	97880037	97885562	0.253266101306441	0.215938403814586	*	*	*	*	*	0	0	*	*	*	*	*	0	0	chr1-97882120:97882310	chr1	97882120	97882310	chr1	97882120	97882310	chr1-97885330:97885948	chr1	97885330	97885948	chr1
chr1	97880037	97901852	0.079365079365079	-0.222854814399865	1	0.904761904761905	0	0.317331360636261	84	5.27399659360365e-12	HypoLow	chr1	97885563	97885697	FirstExon	-	DPYD-IT1	sense_intronic	chr1	97885563	97885697	0.00614256245702498	1	*	*	*	*	*	0	0	*	*	*	*	*	0	0	*	*	*	*	*	0	0	chr1-97885330:97885948	chr1	97885330	97885948	chr1
chr1	97880037	97901852	0.079365079365079	-0.222854814399865	1	0.904761904761905	0	0.317331360636261	84	5.27399659360365e-12	HypoLow	chr1	97885698	97886698	Promoter	-	DPYD-IT1	sense_intronic	chr1	97885698	97886698	0.0458400183360073	1	*	*	*	*	*	0	0	*	*	*	*	*	0	0	*	*	*	*	*	0	0	chr1-97885330:97885948	chr1	97885330	97885948	chr1
chr1	98903890	98915498	0.0909090909090911	-0.250170234785386	0.944444444444444	0.875	0.197224259527442	0.452259883149013	36	3.14728076631559e-05	HypoLow	*	*	*	InterGenic	*	*	*	*	*	*	*	*	*	*	*	*	*	0	0	*	*	*	*	*	0	0	chr1-98905080:98905230	chr1	98905080	98905230	chr1	98905080	98905230	chr1-98914367:98914711	chr1	98914367	98914711	chr1
chr1	99126441	99127602	0.110246163682864	0.32149940217399	0.179144385026738	0.0488095238095238	0.514183803003841	0.18920620363032	33	0.000493824994584917	HypoHigh	chr1	99126256	99127256	Promoter	+	SNX7	protein_coding	chr1	99126441	99127256	0.70198105081826	0.815	CpG: 92	chr1	99126872	99127711	chr1	99126872	99127256	*	*	*	*	*	0	0	chr1-99127020:99127370	chr1	99127020	99127370	chr1	99127020	99127256	chr1-99127244:99127464	chr1	99127244	99127464	chr1
chr1	99126441	99127602	0.110246163682864	0.32149940217399	0.179144385026738	0.0488095238095238	0.514183803003841	0.18920620363032	33	0.000493824994584917	HypoHigh	chr1	99127257	99127467	FirstExon	+	SNX7	protein_coding	chr1	99127257	99127467	0.180878552971576	1	CpG: 92	chr1	99126872	99127711	chr1	99127257	99127467	*	*	*	*	*	0	0	chr1-99127385:99128290	chr1	99127385	99128290	chr1	99127385	99127467	chr1-99127445:99127785	chr1	99127445	99127785	chr1
chr1	99126441	99127602	0.110246163682864	0.32149940217399	0.179144385026738	0.0488095238095238	0.514183803003841	0.18920620363032	33	0.000493824994584917	HypoHigh	chr1	99127468	99150440	Intron1	+	SNX7	protein_coding	chr1	99127468	99127602	0.11541774332472	0.00583318822914853	CpG: 92	chr1	99126872	99127711	chr1	99127468	99127602	*	*	*	*	*	0	0	chr1-99127385:99128290	chr1	99127385	99128290	chr1	99127468	99127602	chr1-99127590:99127840	chr1	99127590	99127840	chr1
chr1	99307483	99309888	0.204166666666666	-0.368352163123342	1	0.75	0	0.486382639009082	13	0.00757466847470759	HyperLow	*	*	*	InterGenic	*	*	*	*	*	*	*	*	*	*	*	*	*	0	0	*	*	*	*	*	0	0	chr1-99309200:99309370	chr1	99309200	99309370	chr1	99309200	99309370	chr1-99307835:99308155	chr1	99307835	99308155	chr1
chr1	100111644	100112003	0.366141456582633	0.01031184731079	0.6125	0.258333333333334	0.501564473609714	0.483406509308132	11	0.0411737675271034	HyperHigh	chr1	100111499	100111918	FirstExon	+	PALMD	protein_coding	chr1	100111644	100111918	0.763231197771588	0.653937947494033	*	*	*	*	*	0	0	*	*	*	*	*	0	0	chr1-100111305:100112150	chr1	100111305	100112150	chr1	100111644	100111918	chr1-100111902:100112637	chr1	100111902	100112637	chr1
chr1	100111644	100112003	0.366141456582633	0.01031184731079	0.6125	0.258333333333334	0.501564473609714	0.483406509308132	11	0.0411737675271034	HyperHigh	chr1	100111919	100127874	Intron1	+	PALMD	protein_coding	chr1	100111919	100112003	0.233983286908078	0.00526480727044814	*	*	*	*	*	0	0	*	*	*	*	*	0	0	chr1-100111305:100112150	chr1	100111305	100112150	chr1	100111919	100112003	chr1-100111967:100112403	chr1	100111967	100112403	chr1
chr1	101704881	101705291	-0.235294117647059	0.135037888403994	0.5	0.80952380952381	0.51505073239965	0.272229696105007	14	0.0425531829324323	HypoHigh	chr1	101704378	101707074	LastExon	+	S1PR1	protein_coding	chr1	101704881	101705291	1	0.152077151335312	*	*	*	*	*	0	0	*	*	*	*	*	0	0	chr1-101704785:101705590	chr1	101704785	101705590	chr1	101704881	101705291	chr1-101704975:101705205	chr1	101704975	101705205	chr1
chr1	101872175	101894506	0.0845238095238096	-0.235744051950419	0.933333333333333	0.833333333333333	0.310659356442522	0.5	59	0.00174024326291845	HypoLow	*	*	*	InterGenic	*	*	*	*	*	*	*	*	*	*	*	*	*	0	0	chr1:101875946-101876333	chr1	101875946	101876333	chr1	101875946	101876333	chr1-101888160:101888330	chr1	101888160	101888330	chr1	101888160	101888330	chr1-101894091:101894532	chr1	101894091	101894532	chr1
chr1	103493343	103507195	0.09090909090909	-0.224171530156879	0.933333333333333	0.826086956521739	0.287706856188877	0.520935543897725	58	0.000183281895781035	HypoLow	chr1	103491889	103496671	Intron5	-	COL11A1	protein_coding	chr1	103493343	103496671	0.240254114929252	0.695943120033459	*	*	*	*	*	0	0	*	*	*	*	*	0	0	*	*	*	*	*	0	0	*	*	*	*	*
chr1	103493343	103507195	0.09090909090909	-0.224171530156879	0.933333333333333	0.826086956521739	0.287706856188877	0.520935543897725	58	0.000183281895781035	HypoLow	chr1	103496672	103496800	Exon5	-	COL11A1	protein_coding	chr1	103496672	103496800	0.00924054288189431	1	*	*	*	*	*	0	0	*	*	*	*	*	0	0	*	*	*	*	*	0	0	*	*	*	*	*
chr1	103493343	103507195	0.09090909090909	-0.224171530156879	0.933333333333333	0.826086956521739	0.287706856188877	0.520935543897725	58	0.000183281895781035	HypoLow	chr1	103496801	103540173	Intron4	-	COL11A1	protein_coding	chr1	103496801	103507195	0.750360958706324	0.239647698976298	*	*	*	*	*	0	0	*	*	*	*	*	0	0	*	*	*	*	*	0	0	chr1-103500820:103501200	chr1	103500820	103501200	chr1
chr1	104581510	104586486	0.120614035087719	-0.282264420527705	0.857843137254902	0.735119047619047	0.306098611351497	0.621659762980364	19	0.0454093361880095	HypoLow	*	*	*	InterGenic	*	*	*	*	*	*	*	*	*	*	*	*	*	0	0	chr1:104585164-104585551	chr1	104585164	104585551	chr1	104585164	104585551	*	*	*	*	*	0	0	*	*	*	*	*
chr1	105059828	105061608	0.177375256322625	-0.2196748818641	0.961538461538461	0.685855263157894	0.243550091017914	0.493618216330697	15	0.0029254660097692	HypoLow	*	*	*	InterGenic	*	*	*	*	*	*	*	*	*	*	*	*	*	0	0	*	*	*	*	*	0	0	*	*	*	*	*	0	0	chr1-105059986:105060256	chr1	105059986	105060256	chr1
chr1	106032563	106035790	0.119240196078431	-0.217661477131198	0.933333333333333	0.738636363636364	0.306703988156976	0.48345193139559	19	0.031951865897611	HypoLow	*	*	*	InterGenic	*	*	*	*	*	*	*	*	*	*	*	*	*	0	0	*	*	*	*	*	0	0	chr1-106035660:106035830	chr1	106035660	106035830	chr1	106035660	106035790	chr1-106035756:106036132	chr1	106035756	106036132	chr1
chr1	106887393	106899967	0.088815789473684	-0.211779514389691	0.888888888888889	0.705882352941177	0.306098611351497	0.507309364962454	44	0.0237797797861515	HypoLow	*	*	*	InterGenic	*	*	*	*	*	*	*	*	*	*	*	*	*	0	0	*	*	*	*	*	0	0	chr1-106897825:106897975	chr1	106897825	106897975	chr1	106897825	106897975	chr1-106897990:106898300	chr1	106897990	106898300	chr1
chr1	107058598	107065417	0.1	-0.259357301704213	0.909090909090909	0.789473684210526	0.270426041486378	0.507309364962454	36	0.0570918753153201	HypoLow	*	*	*	InterGenic	*	*	*	*	*	*	*	*	*	*	*	*	*	0	0	*	*	*	*	*	0	0	chr1-107062325:107062475	chr1	107062325	107062475	chr1	107062325	107062475	chr1-107064841:107065477	chr1	107064841	107065477	chr1
chr1	107178194	107179510	0.166666666666667	0.234436241193308	0.842105263157895	0.666666666666667	0.468546354076522	0.318144667641655	14	0.225357872819692	HypoHigh	*	*	*	InterGenic	*	*	*	*	*	*	*	*	*	*	*	*	*	0	0	*	*	*	*	*	0	0	*	*	*	*	*	0	0	chr1-107178095:107178952	chr1	107178095	107178952	chr1
chr1	107217579	107225497	0.0698392790784095	-0.221103842578694	0.928571428571429	0.78125	0.262580438494626	0.533692012218979	43	0.0300931013987167	HypoLow	*	*	*	InterGenic	*	*	*	*	*	*	*	*	*	*	*	*	*	0	0	*	*	*	*	*	0	0	chr1-107224780:107225010	chr1	107224780	107225010	chr1	107224780	107225010	chr1-107225135:107225515	chr1	107225135	107225515	chr1
chr1	107748179	107755440	0.0846702317290555	-0.237268051116687	0.928205128205128	0.777777777777778	0.222343476214566	0.493191319504541	51	0.000673897712764042	HypoLow	chr1	107691462	107866903	Intron2	+	NTNG1	protein_coding	chr1	107748179	107755440	1	0.0413871329962779	*	*	*	*	*	0	0	*	*	*	*	*	0	0	chr1-107754825:107754975	chr1	107754825	107754975	chr1	107754825	107754975	chr1-107753950:107754430	chr1	107753950	107754430	chr1
chr1	108963806	108964408	0.258129338691999	-0.00702609205678001	0.625776397515528	0.393020594965675	0.660616291837014	0.693850056803903	25	7.83779171706174e-05	HyperHigh	chr1	108918604	108993188	Intron1	+	NBPF6	protein_coding	chr1	108963806	108964408	1	0.00807143623297222	CpG: 51	chr1	108963749	108964291	chr1	108963806	108964291	*	*	*	*	*	0	0	*	*	*	*	*	0	0	*	*	*	*	*
chr1	108963806	108964408	0.258129338691999	-0.00702609205678001	0.625776397515528	0.393020594965675	0.660616291837014	0.693850056803903	25	7.83779171706174e-05	HyperHigh	chr1	108963311	108964196	FirstExon	+	RP11-131J3.1	lincRNA	chr1	108963806	108964196	0.647840531561462	0.440677966101695	CpG: 51	chr1	108963749	108964291	chr1	108963806	108964196	*	*	*	*	*	0	0	*	*	*	*	*	0	0	*	*	*	*	*
chr1	108963806	108964408	0.258129338691999	-0.00702609205678001	0.625776397515528	0.393020594965675	0.660616291837014	0.693850056803903	25	7.83779171706174e-05	HyperHigh	chr1	108964197	108974211	Intron1	+	RP11-131J3.1	lincRNA	chr1	108964197	108964408	0.350498338870432	0.0210705012981825	CpG: 51	chr1	108963749	108964291	chr1	108964197	108964291	*	*	*	*	*	0	0	*	*	*	*	*	0	0	*	*	*	*	*
chr1	109236437	109237234	0.399159663865547	-0.114555204878465	0.842105263157895	0.4375	0.507309364962454	0.597493750120193	10	0.0016731410288292	HyperLow	chr1	109235490	109238323	Intron1	+	PRPF38B	protein_coding	chr1	109236437	109237234	1	0.281327214966467	*	*	*	*	*	0	0	*	*	*	*	*	0	0	chr1-109237120:109237450	chr1	109237120	109237450	chr1	109237120	109237234	chr1-109237017:109237441	chr1	109237017	109237441	chr1
chr1	109631564	109632775	0.333333333333333	-0.146775843334821	0.866666666666667	0.470588235294118	0.307309364962454	0.506576153859854	26	3.5892826993137e-05	HyperLow	chr1	109630593	109633480	FirstExon	-	RP5-1065J22.8	antisense	chr1	109631564	109632775	1	0.41946657429858	*	*	*	*	*	0	0	*	*	*	*	*	0	0	chr1-109631825:109632135	chr1	109631825	109632135	chr1	109631825	109632135	chr1-109632736:109633910	chr1	109632736	109633910	chr1
chr1	109631564	109632775	0.333333333333333	-0.146775843334821	0.866666666666667	0.470588235294118	0.307309364962454	0.506576153859854	26	3.5892826993137e-05	HyperLow	chr1	109631424	109632424	Promoter	+	TMEM167B	protein_coding	chr1	109631564	109632424	0.710156895127993	0.86	*	*	*	*	*	0	0	*	*	*	*	*	0	0	chr1-109631825:109632135	chr1	109631825	109632135	chr1	109631825	109632135	chr1-109632367:109632747	chr1	109632367	109632747	chr1
chr1	109631564	109632775	0.333333333333333	-0.146775843334821	0.866666666666667	0.470588235294118	0.307309364962454	0.506576153859854	26	3.5892826993137e-05	HyperLow	chr1	109632425	109633504	FirstExon	+	TMEM167B	protein_coding	chr1	109632425	109632775	0.289017341040462	0.324374420759963	*	*	*	*	*	0	0	*	*	*	*	*	0	0	*	*	*	*	*	0	0	chr1-109632736:109633910	chr1	109632736	109633910	chr1
chr1	109729428	109732081	0.0642806267806265	-0.263423220142872	0.875	0.807598039215687	0.270426041486378	0.566001942430226	27	0.0572268150186306	HypoLow	chr1	109727756	109730798	Intron8	+	KIAA1324	protein_coding	chr1	109729428	109730798	0.516396532227667	0.450361604207758	*	*	*	*	*	0	0	*	*	*	*	*	0	0	chr1-109730225:109730515	chr1	109730225	109730515	chr1	109730225	109730515	chr1-109730441:109730657	chr1	109730441	109730657	chr1
chr1	109729428	109732081	0.0642806267806265	-0.263423220142872	0.875	0.807598039215687	0.270426041486378	0.566001942430226	27	0.0572268150186306	HypoLow	chr1	109730799	109730976	Exon9	+	KIAA1324	protein_coding	chr1	109730799	109730976	0.0667169242367132	1	*	*	*	*	*	0	0	*	*	*	*	*	0	0	*	*	*	*	*	0	0	chr1-109730380:109730830	chr1	109730380	109730830	chr1
chr1	109729428	109732081	0.0642806267806265	-0.263423220142872	0.875	0.807598039215687	0.270426041486378	0.566001942430226	27	0.0572268150186306	HypoLow	chr1	109730977	109731687	Intron9	+	KIAA1324	protein_coding	chr1	109730977	109731687	0.26762156049755	1	*	*	*	*	*	0	0	*	*	*	*	*	0	0	chr1-109731485:109731735	chr1	109731485	109731735	chr1	109731485	109731687	chr1-109731140:109731410	chr1	109731140	109731410	chr1
chr1	109729428	109732081	0.0642806267806265	-0.263423220142872	0.875	0.807598039215687	0.270426041486378	0.566001942430226	27	0.0572268150186306	HypoLow	chr1	109731688	109731816	Exon10	+	KIAA1324	protein_coding	chr1	109731688	109731816	0.0482472672446287	1	*	*	*	*	*	0	0	*	*	*	*	*	0	0	chr1-109731485:109731735	chr1	109731485	109731735	chr1	109731688	109731735	*	*	*	*	*
chr1	109729428	109732081	0.0642806267806265	-0.263423220142872	0.875	0.807598039215687	0.270426041486378	0.566001942430226	27	0.0572268150186306	HypoLow	chr1	109731817	109732213	Intron10	+	KIAA1324	protein_coding	chr1	109731817	109732081	0.0995099886920467	0.666666666666667	*	*	*	*	*	0	0	*	*	*	*	*	0	0	*	*	*	*	*	0	0	*	*	*	*	*
chr1	110200725	110209550	0.041666666666667	-0.251799617272235	1	0.909090909090909	0	0.346950694324252	66	0.0123314815196414	HypoLow	chr1	110200495	110201435	Intron5	+	GSTM4	protein_coding	chr1	110200725	110201435	0.0804532577903683	0.75531914893617	*	*	*	*	*	0	0	*	*	*	*	*	0	0	chr1-110200985:110201575	chr1	110200985	110201575	chr1	110200985	110201435	chr1-110201383:110201575	chr1	110201383	110201575	chr1
chr1	110200725	110209550	0.041666666666667	-0.251799617272235	1	0.909090909090909	0	0.346950694324252	66	0.0123314815196414	HypoLow	chr1	110201436	110201531	Exon6	+	GSTM4	protein_coding	chr1	110201436	110201531	0.0107648725212465	1	*	*	*	*	*	0	0	*	*	*	*	*	0	0	chr1-110200985:110201575	chr1	110200985	110201575	chr1	110201436	110201531	chr1-110201383:110201575	chr1	110201383	110201575	chr1
chr1	110200725	110209550	0.041666666666667	-0.251799617272235	1	0.909090909090909	0	0.346950694324252	66	0.0123314815196414	HypoLow	chr1	110201532	110201621	Intron6	+	GSTM4	protein_coding	chr1	110201532	110201621	0.0100849858356941	1	*	*	*	*	*	0	0	*	*	*	*	*	0	0	chr1-110200985:110201575	chr1	110200985	110201575	chr1	110201532	110201575	chr1-110201383:110201575	chr1	110201383	110201575	chr1
chr1	110200725	110209550	0.041666666666667	-0.251799617272235	1	0.909090909090909	0	0.346950694324252	66	0.0123314815196414	HypoLow	chr1	110201622	110201732	Exon7	+	GSTM4	protein_coding	chr1	110201622	110201732	0.0124645892351275	1	*	*	*	*	*	0	0	*	*	*	*	*	0	0	*	*	*	*	*	0	0	chr1-110201703:110201996	chr1	110201703	110201996	chr1
chr1	110200725	110209550	0.041666666666667	-0.251799617272235	1	0.909090909090909	0	0.346950694324252	66	0.0123314815196414	HypoLow	chr1	110201733	110207632	Intron7	+	GSTM4	protein_coding	chr1	110201733	110207632	0.668441926345609	1	*	*	*	*	*	0	0	*	*	*	*	*	0	0	chr1-110207380:110207570	chr1	110207380	110207570	chr1	110207380	110207570	chr1-110206735:110207111	chr1	110206735	110207111	chr1
chr1	110200725	110209550	0.041666666666667	-0.251799617272235	1	0.909090909090909	0	0.346950694324252	66	0.0123314815196414	HypoLow	chr1	110207633	110208118	LastExon	+	GSTM4	protein_coding	chr1	110207633	110208118	0.054957507082153	1	*	*	*	*	*	0	0	*	*	*	*	*	0	0	*	*	*	*	*	0	0	chr1-110208028:110208438	chr1	110208028	110208438	chr1
chr1	110386435	110391338	-0.0571895424836605	0.21973964930115	0.925824175824176	1	0.409857986171208	0	33	0.0144377481776861	HypoHigh	chr1	110376038	110413989	Intron3	+	RP4-735C1.6	lincRNA	chr1	110386435	110391338	1	0.129192906642776	*	*	*	*	*	0	0	*	*	*	*	*	0	0	chr1-110391300:110391515	chr1	110391300	110391515	chr1	110391300	110391338	chr1-110391328:110391698	chr1	110391328	110391698	chr1
chr1	110849921	110872739	0.0608294930875575	-0.229895874840346	1	0.905505952380953	0.065207260604876	0.364024066209113	155	1.31455452655665e-09	HypoLow	chr1	110835130	110861386	Intron2	-	RP5-1074L1.1	antisense	chr1	110849921	110861386	0.502454202822333	0.436662096282754	*	*	*	*	*	0	0	*	*	*	*	*	0	0	chr1-110859765:110859915	chr1	110859765	110859915	chr1	110859765	110859915	chr1-110860403:110860643	chr1	110860403	110860643	chr1
chr1	110849921	110872739	0.0608294930875575	-0.229895874840346	1	0.905505952380953	0.065207260604876	0.364024066209113	155	1.31455452655665e-09	HypoLow	chr1	110861387	110861504	Exon2	-	RP5-1074L1.1	antisense	chr1	110861387	110861504	0.00512753089666053	1	*	*	*	*	*	0	0	*	*	*	*	*	0	0	*	*	*	*	*	0	0	*	*	*	*	*
chr1	110849921	110872739	0.0608294930875575	-0.229895874840346	1	0.905505952380953	0.065207260604876	0.364024066209113	155	1.31455452655665e-09	HypoLow	chr1	110861505	110881618	Intron1	-	RP5-1074L1.1	antisense	chr1	110861505	110872739	0.492330616180209	0.558544225128027	*	*	*	*	*	0	0	*	*	*	*	*	0	0	chr1-110871460:110871610	chr1	110871460	110871610	chr1	110871460	110871610	chr1-110871425:110871682	chr1	110871425	110871682	chr1
chr1	111100104	111104374	0.0909090909090911	-0.204928970532924	0.894736842105263	0.8	0.373880254062286	0.518885569154274	32	0.0276059768995112	HypoLow	*	*	*	InterGenic	*	*	*	*	*	*	*	*	*	*	*	*	*	0	0	*	*	*	*	*	0	0	chr1-111104085:111104335	chr1	111104085	111104335	chr1	111104085	111104335	*	*	*	*	*
chr1	111303061	111317008	0.0645833333333335	-0.205926394793961	0.912878787878788	0.845238095238095	0.255534369891082	0.462764942780706	67	0.0080014511987845	HypoLow	*	*	*	InterGenic	*	*	*	*	*	*	*	*	*	*	*	*	*	0	0	*	*	*	*	*	0	0	chr1-111317000:111317350	chr1	111317000	111317350	chr1	111317000	111317008	chr1-111316931:111317461	chr1	111316931	111317461	chr1
chr1	111583122	111602239	0.0705882352941175	-0.210073486435629	0.923076923076923	0.857142857142857	0.240642698295787	0.458289014656807	81	0.00134024943785027	HypoLow	*	*	*	InterGenic	*	*	*	*	*	*	*	*	*	*	*	*	*	0	0	*	*	*	*	*	0	0	chr1-111594940:111595210	chr1	111594940	111595210	chr1	111594940	111595210	chr1-111599178:111599594	chr1	111599178	111599594	chr1
chr1	112041662	112046961	0.10421888053467	-0.269531595432119	1	0.857142857142857	0	0.417209722462608	33	5.75063138744966e-05	HypoLow	chr1	112033385	112106467	Intron1	-	ADORA3	protein_coding	chr1	112041662	112046961	1	0.0725075942092444	*	*	*	*	*	0	0	*	*	*	*	*	0	0	chr1-112046445:112046795	chr1	112046445	112046795	chr1	112046445	112046795	chr1-112046687:112047064	chr1	112046687	112047064	chr1
chr1	112938141	112939505	0.0729166666666667	0.207384393939607	0.111455108359133	0	0.395538216614484	0.135121552260398	39	5.21165243417108e-05	HypoHigh	chr1	112937802	112938802	Promoter	+	CTTNBP2NL	protein_coding	chr1	112938141	112938802	0.484604105571848	0.661	CpG: 46	chr1	112938495	112939113	chr1	112938495	112938802	*	*	*	*	*	0	0	chr1-112938505:112938895	chr1	112938505	112938895	chr1	112938505	112938802	chr1-112938784:112939144	chr1	112938784	112939144	chr1
chr1	112938141	112939505	0.0729166666666667	0.207384393939607	0.111455108359133	0	0.395538216614484	0.135121552260398	39	5.21165243417108e-05	HypoHigh	chr1	112938803	112938894	FirstExon	+	CTTNBP2NL	protein_coding	chr1	112938803	112938894	0.0667155425219941	1	CpG: 46	chr1	112938495	112939113	chr1	112938803	112938894	*	*	*	*	*	0	0	chr1-112938505:112938895	chr1	112938505	112938895	chr1	112938803	112938894	chr1-112938855:112939359	chr1	112938855	112939359	chr1
chr1	112938141	112939505	0.0729166666666667	0.207384393939607	0.111455108359133	0	0.395538216614484	0.135121552260398	39	5.21165243417108e-05	HypoHigh	chr1	112938895	112954815	Intron1	+	CTTNBP2NL	protein_coding	chr1	112938895	112939505	0.447214076246334	0.0383165829145729	CpG: 46	chr1	112938495	112939113	chr1	112938895	112939113	*	*	*	*	*	0	0	chr1-112939340:112940095	chr1	112939340	112940095	chr1	112939340	112939505	chr1-112939039:112939569	chr1	112939039	112939569	chr1
chr1	113051585	113055061	0.161904761904762	0.205830820394918	0.599358974358974	0.405882352941176	0.484660592125405	0.270426041486378	43	0.0207934247824607	HypoHigh	chr1	113033704	113057495	Intron2	+	WNT2B	protein_coding	chr1	113051585	113055061	1	0.146105670211424	CpG: 144	chr1	113050813	113052301	chr1	113051585	113052301	*	*	*	*	*	0	0	chr1-113055005:113055495	chr1	113055005	113055495	chr1	113055005	113055061	chr1-113054748:113055098	chr1	113054748	113055098	chr1
chr1	113265040	113265852	0.166666666666667	0.306098611351497	0.272727272727273	0	0.482205555876069	0.197224259527442	16	0.0105016742130496	HypoHigh	chr1	113264971	113265637	Intron2	+	FAM19A3	protein_coding	chr1	113265040	113265637	0.735221674876847	0.896396396396396	CpG: 20	chr1	113265573	113265787	chr1	113265573	113265637	*	*	*	*	*	0	0	chr1-113265220:113265655	chr1	113265220	113265655	chr1	113265220	113265637	chr1-113265521:113266264	chr1	113265521	113266264	chr1
chr1	113265040	113265852	0.166666666666667	0.306098611351497	0.272727272727273	0	0.482205555876069	0.197224259527442	16	0.0105016742130496	HypoHigh	chr1	113265638	113265787	Exon3	+	FAM19A3	protein_coding	chr1	113265638	113265787	0.183497536945813	1	CpG: 20	chr1	113265573	113265787	chr1	113265638	113265787	*	*	*	*	*	0	0	chr1-113265785:113266115	chr1	113265785	113266115	chr1	113265785	113265787	chr1-113265732:113266032	chr1	113265732	113266032	chr1
chr1	113265040	113265852	0.166666666666667	0.306098611351497	0.272727272727273	0	0.482205555876069	0.197224259527442	16	0.0105016742130496	HypoHigh	chr1	113265788	113266566	Intron3	+	FAM19A3	protein_coding	chr1	113265788	113265852	0.0788177339901478	0.0822622107969152	*	*	*	*	*	0	0	*	*	*	*	*	0	0	chr1-113265785:113266115	chr1	113265785	113266115	chr1	113265788	113265852	chr1-113265843:113266139	chr1	113265843	113266139	chr1
chr1	113286041	113287132	0.25	-0.0788864718007329	0.714285714285714	0.466666666666667	0.524207887965055	0.574410476265873	38	2.08667039536885e-05	HyperHigh	*	*	*	InterGenic	*	*	*	*	*	*	*	*	CpG: 85	chr1	113286332	113287172	chr1	113286332	113287132	*	*	*	*	*	0	0	chr1-113286960:113287215	chr1	113286960	113287215	chr1	113286960	113287132	chr1-113286941:113287200	chr1	113286941	113287200	chr1
chr1	115083139	115089829	0.0745614035087719	-0.216577697307024	0.9375	0.842105263157895	0.181188147733199	0.425871145606372	48	0.00139276393360986	HypoLow	*	*	*	InterGenic	*	*	*	*	*	*	*	*	*	*	*	*	*	0	0	*	*	*	*	*	0	0	chr1-115089820:115090015	chr1	115089820	115090015	chr1	115089820	115089829	chr1-115089737:115089977	chr1	115089737	115089977	chr1
chr1	115212948	115214153	0.153846153846154	0.205571885739253	0.473684210526316	0.130434782608696	0.561938569717677	0.315457645328481	22	0.0892846714113921	HypoHigh	chr1	115212733	115213733	Promoter	-	DENND2C	protein_coding	chr1	115212948	115213733	0.651452282157676	0.785	CpG: 73	chr1	115212239	115212985	chr1	115212948	115212985	*	*	*	*	*	0	0	chr1-115212920:115213555	chr1	115212920	115213555	chr1	115212948	115213555	chr1-115213623:115213993	chr1	115213623	115213993	chr1
chr1	115397582	115398042	0.227272727272727	0.024051884586424	0.454545454545455	0.19047619047619	0.520426041486377	0.518885569154274	16	0.0397911484066329	HyperHigh	chr1	115397424	115397639	FirstExon	+	SYCP1	protein_coding	chr1	115397582	115397639	0.123913043478261	0.265116279069767	CpG: 37	chr1	115397448	115397942	chr1	115397582	115397639	*	*	*	*	*	0	0	chr1-115397600:115397770	chr1	115397600	115397770	chr1	115397600	115397639	chr1-115397614:115397814	chr1	115397614	115397814	chr1
chr1	115397582	115398042	0.227272727272727	0.024051884586424	0.454545454545455	0.19047619047619	0.520426041486377	0.518885569154274	16	0.0397911484066329	HyperHigh	chr1	115397640	115398061	Intron1	+	SYCP1	protein_coding	chr1	115397640	115398042	0.873913043478261	0.954869358669834	CpG: 37	chr1	115397448	115397942	chr1	115397640	115397942	*	*	*	*	*	0	0	chr1-115397600:115397770	chr1	115397600	115397770	chr1	115397640	115397770	chr1-115397614:115397814	chr1	115397614	115397814	chr1
chr1	115880067	115881543	0.215188834154352	0.110205354229445	0.5625	0.137387387387387	0.635872577395516	0.52789061744481	47	8.84360600962532e-06	HyperHigh	chr1	115825862	115908290	Intron1	+	RP4-663N10.1	antisense	chr1	115880067	115881543	1	0.017906536613772	CpG: 103	chr1	115880167	115881332	chr1	115880167	115881332	*	*	*	*	*	0	0	chr1-115881525:115881675	chr1	115881525	115881675	chr1	115881525	115881543	chr1-115880731:115880967	chr1	115880731	115880967	chr1
chr1	115880067	115881543	0.215188834154352	0.110205354229445	0.5625	0.137387387387387	0.635872577395516	0.52789061744481	47	8.84360600962532e-06	HyperHigh	chr1	115836372	115880824	Intron1	-	NGF	protein_coding	chr1	115880067	115880824	0.512872628726287	0.0170296049671556	CpG: 103	chr1	115880167	115881332	chr1	115880167	115880824	*	*	*	*	*	0	0	chr1-115879185:115880990	chr1	115879185	115880990	chr1	115880067	115880824	chr1-115880731:115880967	chr1	115880731	115880967	chr1
chr1	115880067	115881543	0.215188834154352	0.110205354229445	0.5625	0.137387387387387	0.635872577395516	0.52789061744481	47	8.84360600962532e-06	HyperHigh	chr1	115880825	115880857	FirstExon	-	NGF	protein_coding	chr1	115880825	115880857	0.021680216802168	1	CpG: 103	chr1	115880167	115881332	chr1	115880825	115880857	*	*	*	*	*	0	0	chr1-115879185:115880990	chr1	115879185	115880990	chr1	115880825	115880857	chr1-115880731:115880967	chr1	115880731	115880967	chr1
chr1	115880067	115881543	0.215188834154352	0.110205354229445	0.5625	0.137387387387387	0.635872577395516	0.52789061744481	47	8.84360600962532e-06	HyperHigh	chr1	115880858	115881858	Promoter	-	NGF	protein_coding	chr1	115880858	115881543	0.464092140921409	0.685	CpG: 103	chr1	115880167	115881332	chr1	115880858	115881332	*	*	*	*	*	0	0	chr1-115881525:115881675	chr1	115881525	115881675	chr1	115881525	115881543	chr1-115880731:115880967	chr1	115880731	115880967	chr1
chr1	116257849	116268362	0.0855157913981445	-0.242725414176361	0.9375	0.848076923076923	0.228658419422619	0.477485416947116	79	2.72334165127066e-06	HypoLow	chr1	116247914	116260460	Intron8	-	CASQ2	protein_coding	chr1	116257849	116260460	0.24835917435556	0.208114139964929	*	*	*	*	*	0	0	*	*	*	*	*	0	0	chr1-116260185:116260450	chr1	116260185	116260450	chr1	116260185	116260450	chr1-116260248:116260386	chr1	116260248	116260386	chr1
chr1	116257849	116268362	0.0855157913981445	-0.242725414176361	0.9375	0.848076923076923	0.228658419422619	0.477485416947116	79	2.72334165127066e-06	HypoLow	chr1	116260461	116260515	Exon8	-	CASQ2	protein_coding	chr1	116260461	116260515	0.00513649766955198	1	*	*	*	*	*	0	0	*	*	*	*	*	0	0	*	*	*	*	*	0	0	chr1-116260192:116260528	chr1	116260192	116260528	chr1
chr1	116257849	116268362	0.0855157913981445	-0.242725414176361	0.9375	0.848076923076923	0.228658419422619	0.477485416947116	79	2.72334165127066e-06	HypoLow	chr1	116260516	116268128	Intron7	-	CASQ2	protein_coding	chr1	116260516	116268128	0.724055930752402	1	*	*	*	*	*	0	0	*	*	*	*	*	0	0	chr1-116266480:116266650	chr1	116266480	116266650	chr1	116266480	116266650	chr1-116266508:116266864	chr1	116266508	116266864	chr1
chr1	116257849	116268362	0.0855157913981445	-0.242725414176361	0.9375	0.848076923076923	0.228658419422619	0.477485416947116	79	2.72334165127066e-06	HypoLow	chr1	116268129	116268174	Exon7	-	CASQ2	protein_coding	chr1	116268129	116268174	0.00428041472462665	1	*	*	*	*	*	0	0	*	*	*	*	*	0	0	*	*	*	*	*	0	0	*	*	*	*	*
chr1	116257849	116268362	0.0855157913981445	-0.242725414176361	0.9375	0.848076923076923	0.228658419422619	0.477485416947116	79	2.72334165127066e-06	HypoLow	chr1	116268175	116269612	Intron6	-	CASQ2	protein_coding	chr1	116268175	116268362	0.0177875011890041	0.130132219902575	*	*	*	*	*	0	0	*	*	*	*	*	0	0	chr1-116268280:116268490	chr1	116268280	116268490	chr1	116268280	116268362	chr1-116268361:116268484	chr1	116268361	116268484	chr1
chr1	116370827	116371474	0.25	0.331096574046277	0.266666666666667	0.0625	0.524467484139256	0.197224259527442	24	0.000172154675873828	HyperHigh	*	*	*	InterGenic	*	*	*	*	*	*	*	*	CpG: 48	chr1	116370810	116371303	chr1	116370827	116371303	chr1:116370977-116371565	chr1	116370977	116371565	chr1	116370977	116371474	chr1-116370840:116371670	chr1	116370840	116371670	chr1	116370840	116371474	chr1-116371426:116371631	chr1	116371426	116371631	chr1
chr1	116382292	116383275	0.233333333333334	0.08106377316818	0.571895424836601	0.130252100840336	0.519242592913106	0.330358686612741	23	0.00876279559358098	HyperHigh	chr1	116379313	116386538	FirstExon	-	NHLH2	protein_coding	chr1	116382292	116383275	1	0.136055363321799	CpG: 209	chr1	116380359	116382364	chr1	116382292	116382364	*	*	*	*	*	0	0	chr1-116383240:116383935	chr1	116383240	116383935	chr1	116383240	116383275	chr1-116382802:116383486	chr1	116382802	116383486	chr1
chr1	117292597	117300429	-0.228571428571429	0.221950694324251	0.577380952380952	0.916083916083916	0.556279629950143	0.306098611351497	47	7.72470575416739e-05	HypoHigh	chr1	117296006	117297006	Promoter	+	CD2	protein_coding	chr1	117296006	117297006	0.127681307456588	1	*	*	*	*	*	0	0	*	*	*	*	*	0	0	chr1-117296905:117297135	chr1	117296905	117297135	chr1	117296905	117297006	chr1-117296970:117297240	chr1	117296970	117297240	chr1
chr1	117292597	117300429	-0.228571428571429	0.221950694324251	0.577380952380952	0.916083916083916	0.556279629950143	0.306098611351497	47	7.72470575416739e-05	HypoHigh	chr1	117297007	117297175	FirstExon	+	CD2	protein_coding	chr1	117297007	117297175	0.0214504596527068	1	*	*	*	*	*	0	0	*	*	*	*	*	0	0	chr1-117296905:117297135	chr1	117296905	117297135	chr1	117297007	117297135	chr1-117296970:117297240	chr1	117296970	117297240	chr1
chr1	117292597	117300429	-0.228571428571429	0.221950694324251	0.577380952380952	0.916083916083916	0.556279629950143	0.306098611351497	47	7.72470575416739e-05	HypoHigh	chr1	117297176	117297252	Intron1	+	CD2	protein_coding	chr1	117297176	117297252	0.00970377936670072	1	*	*	*	*	*	0	0	*	*	*	*	*	0	0	*	*	*	*	*	0	0	chr1-117296970:117297240	chr1	117296970	117297240	chr1
chr1	117292597	117300429	-0.228571428571429	0.221950694324251	0.577380952380952	0.916083916083916	0.556279629950143	0.306098611351497	47	7.72470575416739e-05	HypoHigh	chr1	117297253	117297573	Exon2	+	CD2	protein_coding	chr1	117297253	117297573	0.0408580183861083	1	*	*	*	*	*	0	0	*	*	*	*	*	0	0	*	*	*	*	*	0	0	chr1-117297269:117297545	chr1	117297269	117297545	chr1
chr1	117292597	117300429	-0.228571428571429	0.221950694324251	0.577380952380952	0.916083916083916	0.556279629950143	0.306098611351497	47	7.72470575416739e-05	HypoHigh	chr1	117297574	117303023	Intron2	+	CD2	protein_coding	chr1	117297574	117300429	0.36453013278856	0.523949348504313	*	*	*	*	*	0	0	*	*	*	*	*	0	0	chr1-117300400:117300570	chr1	117300400	117300570	chr1	117300400	117300429	chr1-117300401:117301122	chr1	117300401	117301122	chr1
chr1	117367681	117379370	0.0625	-0.23192619754641	1	0.875	0.181188147733199	0.382944951426972	91	6.53469148028744e-08	HypoLow	*	*	*	InterGenic	*	*	*	*	*	*	*	*	*	*	*	*	*	0	0	chr1:117368438-117368774	chr1	117368438	117368774	chr1	117368438	117368774	chr1-117379100:117379270	chr1	117379100	117379270	chr1	117379100	117379270	chr1-117378539:117378923	chr1	117378539	117378923	chr1
chr1	117529547	117529771	-0.285714285714286	0.085802830818651	0.153846153846154	0.428571428571429	0.307309364962454	0.5	8	0.0296622589113772	HypoHigh	chr1	117529423	117532980	LastExon	+	PTGFRN	protein_coding	chr1	117529547	117529771	1	0.0629744166432387	*	*	*	*	*	0	0	*	*	*	*	*	0	0	chr1-117529625:117529650	chr1	117529625	117529650	chr1	117529625	117529650	chr1-117529730:117530254	chr1	117529730	117530254	chr1
chr1	118187495	118189490	0.066666666666667	-0.306098611351497	1	0.9	0	0.328808909576947	20	0.000482985893053668	HypoLow	*	*	*	InterGenic	*	*	*	*	*	*	*	*	*	*	*	*	*	0	0	*	*	*	*	*	0	0	chr1-118189185:118189495	chr1	118189185	118189495	chr1	118189185	118189490	chr1-118189034:118189618	chr1	118189034	118189618	chr1
chr1	119029968	119035406	0.10385101010101	-0.348907406387699	0.881944444444444	0.8125	0	0.517815099268087	27	0.0464951762223634	HypoLow	*	*	*	InterGenic	*	*	*	*	*	*	*	*	*	*	*	*	*	0	0	*	*	*	*	*	0	0	chr1-119035160:119035310	chr1	119035160	119035310	chr1	119035160	119035310	chr1-119030566:119030946	chr1	119030566	119030946	chr1
chr1	119526881	119528046	0.140384615384615	0.306631350436412	0.332720588235294	0.125	0.612197222702993	0.323650198151556	37	0.00150255278441688	HypoHigh	chr1	119474456	119531977	Intron1	-	TBX15	protein_coding	chr1	119526881	119528046	1	0.0202534726447732	CpG: 35	chr1	119526782	119527192	chr1	119526881	119527192	chr1:119526348-119526895	chr1	119526348	119526895	chr1	119526881	119526895	chr1-119526805:119528235	chr1	119526805	119528235	chr1	119526881	119528046	chr1-119527949:119528135	chr1	119527949	119528135	chr1
chr1	119529023	119530676	0.232142857142857	0.215292468241948	0.588235294117647	0.333333333333333	0.640393230649166	0.444893047017198	44	0.000199321336785338	HyperHigh	chr1	119474456	119531977	Intron1	-	TBX15	protein_coding	chr1	119529023	119530676	1	0.0287373307140001	CpG: 84	chr1	119529819	119530712	chr1	119529819	119530676	chr1:119529353-119529528	chr1	119529353	119529528	chr1	119529353	119529528	chr1-119529065:119530735	chr1	119529065	119530735	chr1	119529065	119530676	chr1-119530488:119531160	chr1	119530488	119531160	chr1
chr1	119548802	119551803	0.20918549043549	0.0735156204371795	0.5	0.125	0.503654682481227	0.449004098123819	91	2.05333546754215e-07	HyperHigh	*	*	*	InterGenic	*	*	*	*	*	*	*	*	CpG: 176	chr1	119549144	119551320	chr1	119549144	119551320	*	*	*	*	*	0	0	chr1-119551705:119551910	chr1	119551705	119551910	chr1	119551705	119551803	chr1-119551353:119551567	chr1	119551353	119551567	chr1
chr1	120091771	120092760	0.184210526315789	-0.335977894073514	0.947368421052632	0.75	0.107585652965799	0.5	14	0.0158154974458546	HypoLow	*	*	*	InterGenic	*	*	*	*	*	*	*	*	*	*	*	*	*	0	0	*	*	*	*	*	0	0	chr1-120092305:120092570	chr1	120092305	120092570	chr1	120092305	120092570	chr1-120092307:120092577	chr1	120092307	120092577	chr1
chr1	120255706	120256111	0.321428571428571	-0.124465387694523	0.5	0.178571428571429	0.486382639009082	0.573976031629121	12	0.00250863844073921	HyperLow	chr1	120254784	120263792	Intron1	+	PHGDH	protein_coding	chr1	120255706	120256111	1	0.0449600355239787	*	*	*	*	*	0	0	chr1:120255895-120256325	chr1	120255895	120256325	chr1	120255895	120256111	chr1-120256080:120256730	chr1	120256080	120256730	chr1	120256080	120256111	chr1-120255951:120256731	chr1	120255951	120256731	chr1
chr1	121171701	121184966	0.0625	-0.287706856188877	1	0.863636363636364	0.197224259527442	0.452259883149013	56	4.36601687542906e-05	HypoLow	chr1	121139165	121201872	Intron1	+	AL592494.5	lincRNA	chr1	121171701	121184966	1	0.211539381568246	*	*	*	*	*	0	0	*	*	*	*	*	0	0	chr1-121184945:121185370	chr1	121184945	121185370	chr1	121184945	121184966	chr1-121184938:121185318	chr1	121184938	121185318	chr1
chr1	143543594	143646727	0.235650119582337	-0.156968716752321	0.83421052631579	0.682539682539683	0.306098611351497	0.273370654823642	11	0.0184377824235448	HyperLow	*	*	*	InterGenic	*	*	*	*	*	*	*	*	*	*	*	*	*	0	0	*	*	*	*	*	0	0	chr1-143544020:143544415	chr1	143544020	143544415	chr1	143544020	143544415	chr1-143543628:143543978	chr1	143543628	143543978	chr1
chr1	145415318	145415681	0.276206140350877	-0.137499446951638	0.741830065359477	0.413095238095238	0.53811555349326	0.67728334240384	15	0.00378559407121608	HyperLow	chr1	145415279	145415838	Exon2	+	HFE2	protein_coding	chr1	145415318	145415681	1	0.649373881932022	CpG: 26	chr1	145415411	145415708	chr1	145415411	145415681	*	*	*	*	*	0	0	chr1-145415185:145415675	chr1	145415185	145415675	chr1	145415318	145415675	chr1-145415641:145416339	chr1	145415641	145416339	chr1
chr1	145440345	145441551	0.128571428571429	0.215192173168423	0.333333333333333	0.0714285714285714	0.468546354076522	0.307309364962454	14	0.0716477588922448	HypoHigh	chr1	145440269	145440525	Exon5	+	TXNIP	protein_coding	chr1	145440345	145440525	0.149253731343284	0.703125	*	*	*	*	*	0	0	*	*	*	*	*	0	0	chr1-145440060:145440530	chr1	145440060	145440530	chr1	145440345	145440525	chr1-145440442:145440772	chr1	145440442	145440772	chr1
chr1	145440345	145441551	0.128571428571429	0.215192173168423	0.333333333333333	0.0714285714285714	0.468546354076522	0.307309364962454	14	0.0716477588922448	HypoHigh	chr1	145440526	145440631	Intron5	+	TXNIP	protein_coding	chr1	145440526	145440631	0.0870646766169154	1	*	*	*	*	*	0	0	*	*	*	*	*	0	0	chr1-145440060:145440530	chr1	145440060	145440530	chr1	145440526	145440530	chr1-145440442:145440772	chr1	145440442	145440772	chr1
chr1	145440345	145441551	0.128571428571429	0.215192173168423	0.333333333333333	0.0714285714285714	0.468546354076522	0.307309364962454	14	0.0716477588922448	HypoHigh	chr1	145440632	145440788	Exon6	+	TXNIP	protein_coding	chr1	145440632	145440788	0.129353233830846	1	*	*	*	*	*	0	0	*	*	*	*	*	0	0	*	*	*	*	*	0	0	chr1-145440735:145441155	chr1	145440735	145441155	chr1
chr1	145440345	145441551	0.128571428571429	0.215192173168423	0.333333333333333	0.0714285714285714	0.468546354076522	0.307309364962454	14	0.0716477588922448	HypoHigh	chr1	145440789	145440901	Intron6	+	TXNIP	protein_coding	chr1	145440789	145440901	0.0928689883913764	1	*	*	*	*	*	0	0	*	*	*	*	*	0	0	chr1-145440820:145441055	chr1	145440820	145441055	chr1	145440820	145440901	chr1-145440900:145441484	chr1	145440900	145441484	chr1
chr1	145440345	145441551	0.128571428571429	0.215192173168423	0.333333333333333	0.0714285714285714	0.468546354076522	0.307309364962454	14	0.0716477588922448	HypoHigh	chr1	145440902	145441053	Exon7	+	TXNIP	protein_coding	chr1	145440902	145441053	0.125207296849088	1	*	*	*	*	*	0	0	*	*	*	*	*	0	0	chr1-145440820:145441055	chr1	145440820	145441055	chr1	145440902	145441053	chr1-145441043:145441231	chr1	145441043	145441231	chr1
chr1	145440345	145441551	0.128571428571429	0.215192173168423	0.333333333333333	0.0714285714285714	0.468546354076522	0.307309364962454	14	0.0716477588922448	HypoHigh	chr1	145441054	145441182	Intron7	+	TXNIP	protein_coding	chr1	145441054	145441182	0.106135986733002	1	*	*	*	*	*	0	0	*	*	*	*	*	0	0	chr1-145440820:145441055	chr1	145440820	145441055	chr1	145441054	145441055	chr1-145441159:145441733	chr1	145441159	145441733	chr1
chr1	145440345	145441551	0.128571428571429	0.215192173168423	0.333333333333333	0.0714285714285714	0.468546354076522	0.307309364962454	14	0.0716477588922448	HypoHigh	chr1	145441183	145442635	LastExon	+	TXNIP	protein_coding	chr1	145441183	145441551	0.30514096185738	0.253443526170799	*	*	*	*	*	0	0	*	*	*	*	*	0	0	chr1-145441500:145441730	chr1	145441500	145441730	chr1	145441500	145441551	chr1-145441513:145442043	chr1	145441513	145442043	chr1
chr1	145979221	145979967	0.272995283018868	0.128029800728709	0.529411764705882	0.19047619047619	0.680124464562832	0.516978929666474	28	5.35199547246616e-05	HyperHigh	*	*	*	InterGenic	*	*	*	*	*	*	*	*	CpG: 60	chr1	145979221	145979979	chr1	145979221	145979967	*	*	*	*	*	0	0	*	*	*	*	*	0	0	*	*	*	*	*
chr1	146549144	146551385	0.337622549019608	-0.189670503892874	0.8125	0.46606334841629	0.382944951426972	0.597068387611763	77	2.1805023984301e-15	HyperLow	*	*	*	InterGenic	*	*	*	*	*	*	*	*	CpG: 71	chr1	146550290	146551260	chr1	146550290	146551260	*	*	*	*	*	0	0	chr1-146549505:146552150	chr1	146549505	146552150	chr1	146549505	146551385	chr1-146551337:146551661	chr1	146551337	146551661	chr1
chr1	147104931	147120493	0.108391608391608	-0.240378703543447	0.933333333333333	0.8	0.240642698295787	0.436432222745668	98	1.28743611824628e-06	HypoLow	chr1	147114034	147119368	LastExon	-	ACP6	protein_coding	chr1	147114034	147119368	0.342758000257036	1	*	*	*	*	*	0	0	*	*	*	*	*	0	0	chr1-147119285:147120095	chr1	147119285	147120095	chr1	147119285	147119368	chr1-147119262:147119646	chr1	147119262	147119646	chr1
chr1	147104931	147120493	0.108391608391608	-0.240378703543447	0.933333333333333	0.8	0.240642698295787	0.436432222745668	98	1.28743611824628e-06	HypoLow	chr1	147119369	147120047	Intron9	-	ACP6	protein_coding	chr1	147119369	147120047	0.0435676648245727	1	*	*	*	*	*	0	0	*	*	*	*	*	0	0	chr1-147119285:147120095	chr1	147119285	147120095	chr1	147119369	147120047	chr1-147119980:147120436	chr1	147119980	147120436	chr1
chr1	147104931	147120493	0.108391608391608	-0.240378703543447	0.933333333333333	0.8	0.240642698295787	0.436432222745668	98	1.28743611824628e-06	HypoLow	chr1	147120048	147120213	Exon9	-	ACP6	protein_coding	chr1	147120048	147120213	0.0106027502891659	1	*	*	*	*	*	0	0	*	*	*	*	*	0	0	chr1-147120120:147120370	chr1	147120120	147120370	chr1	147120120	147120213	chr1-147119980:147120436	chr1	147119980	147120436	chr1
chr1	147104931	147120493	0.108391608391608	-0.240378703543447	0.933333333333333	0.8	0.240642698295787	0.436432222745668	98	1.28743611824628e-06	HypoLow	chr1	147120214	147121945	Intron8	-	ACP6	protein_coding	chr1	147120214	147120493	0.0179282868525896	0.161178509532062	*	*	*	*	*	0	0	*	*	*	*	*	0	0	chr1-147120120:147120370	chr1	147120120	147120370	chr1	147120214	147120370	chr1-147119980:147120436	chr1	147119980	147120436	chr1
chr1	147486004	147487646	0.216613247863248	0.0983568724349875	0.607219827586207	0.320685434516524	0.657076729495393	0.608609012079079	57	1.7943610030234e-05	HyperHigh	*	*	*	InterGenic	*	*	*	*	*	*	*	*	CpG: 28	chr1	147486967	147487310	chr1	147486967	147487310	*	*	*	*	*	0	0	*	*	*	*	*	0	0	*	*	*	*	*
chr1	147520954	147521700	0.281083696178036	0.142994831299385	0.527777777777778	0.19047619047619	0.680124464562832	0.516978929666474	28	4.12006343786603e-05	HyperHigh	*	*	*	InterGenic	*	*	*	*	*	*	*	*	CpG: 60	chr1	147520954	147521712	chr1	147520954	147521700	*	*	*	*	*	0	0	*	*	*	*	*	0	0	*	*	*	*	*
chr1	147751622	147752653	0.25	-0.0890979898812669	0.833333333333333	0.428571428571429	0.45698353148489	0.500538157270061	14	0.0191311624394861	HyperHigh	chr1	147745214	147752771	Intron1	-	RP11-495P10.6	lincRNA	chr1	147751622	147752653	1	0.136429800185259	*	*	*	*	*	0	0	*	*	*	*	*	0	0	chr1-147752460:147752910	chr1	147752460	147752910	chr1	147752460	147752653	chr1-147752631:147752909	chr1	147752631	147752909	chr1
chr1	147800990	147803091	0.0903820816864295	-0.238838670858929	0.962250712250712	0.866666666666667	0.16525916135437	0.364170888973919	51	3.11185983563215e-07	HypoLow	chr1	147800123	147801123	Promoter	+	RP11-495P10.3	lincRNA	chr1	147800990	147801123	0.0633031889576392	0.133	*	*	*	*	*	0	0	*	*	*	*	*	0	0	*	*	*	*	*	0	0	chr1-147801094:147801370	chr1	147801094	147801370	chr1
chr1	147800990	147803091	0.0903820816864295	-0.238838670858929	0.962250712250712	0.866666666666667	0.16525916135437	0.364170888973919	51	3.11185983563215e-07	HypoLow	chr1	147801124	147801487	FirstExon	+	RP11-495P10.3	lincRNA	chr1	147801124	147801487	0.172774869109948	1	*	*	*	*	*	0	0	*	*	*	*	*	0	0	chr1-147801125:147801275	chr1	147801125	147801275	chr1	147801125	147801275	chr1-147801094:147801370	chr1	147801094	147801370	chr1
chr1	147800990	147803091	0.0903820816864295	-0.238838670858929	0.962250712250712	0.866666666666667	0.16525916135437	0.364170888973919	51	3.11185983563215e-07	HypoLow	chr1	147801488	147801650	Intron1	+	RP11-495P10.3	lincRNA	chr1	147801488	147801650	0.0771061399333651	1	*	*	*	*	*	0	0	*	*	*	*	*	0	0	chr1-147801500:147801735	chr1	147801500	147801735	chr1	147801500	147801650	*	*	*	*	*
chr1	147800990	147803091	0.0903820816864295	-0.238838670858929	0.962250712250712	0.866666666666667	0.16525916135437	0.364170888973919	51	3.11185983563215e-07	HypoLow	chr1	147801651	147802209	Exon2	+	RP11-495P10.3	lincRNA	chr1	147801651	147802209	0.265587815326035	1	*	*	*	*	*	0	0	*	*	*	*	*	0	0	chr1-147801500:147801735	chr1	147801500	147801735	chr1	147801651	147801735	*	*	*	*	*
chr1	147800990	147803091	0.0903820816864295	-0.238838670858929	0.962250712250712	0.866666666666667	0.16525916135437	0.364170888973919	51	3.11185983563215e-07	HypoLow	chr1	147802210	147816356	Intron2	+	RP11-495P10.3	lincRNA	chr1	147802210	147803091	0.419324131366016	0.0622790894952637	*	*	*	*	*	0	0	*	*	*	*	*	0	0	chr1-147802745:147802895	chr1	147802745	147802895	chr1	147802745	147802895	*	*	*	*	*
chr1	147833412	147834049	0.372807017543859	0.077978523212391	0.6	0.136363636363636	0.609623787750815	0.510971521326466	26	1.17325619890034e-07	HyperHigh	*	*	*	InterGenic	*	*	*	*	*	*	*	*	*	*	*	*	*	0	0	*	*	*	*	*	0	0	*	*	*	*	*	0	0	*	*	*	*	*
chr1	149137209	149138615	0.261904761904762	0.049380818426502	0.611111111111111	0.36	0.630353704024218	0.566813239380364	44	0.00013887013002347	HyperHigh	*	*	*	InterGenic	*	*	*	*	*	*	*	*	CpG: 75	chr1	149137542	149138399	chr1	149137542	149138399	chr1:149138053-149138113	chr1	149138053	149138113	chr1	149138053	149138113	chr1-149138605:149138915	chr1	149138605	149138915	chr1	149138605	149138615	chr1-149137970:149138215	chr1	149137970	149138215	chr1
chr1	149155688	149157099	0.238095238095239	0.057953664981404	0.592592592592593	0.304347826086957	0.607675496904295	0.584238426326568	46	4.1252043495084e-05	HyperHigh	*	*	*	InterGenic	*	*	*	*	*	*	*	*	CpG: 46	chr1	149156106	149156671	chr1	149156106	149156671	*	*	*	*	*	0	0	chr1-149156445:149156755	chr1	149156445	149156755	chr1	149156445	149156755	chr1-149156336:149156773	chr1	149156336	149156773	chr1
chr1	149825265	149826900	-0.145147222768706	-0.208980511273238	0.200892857142857	0.495833333333333	0.444957589191678	0.541225076502304	29	0.0603291308474239	HypoLow	chr1	149824181	149825836	FirstExon	+	HIST2H3A	protein_coding	chr1	149825265	149825836	0.349235474006116	0.345015105740181	*	*	*	*	*	0	0	*	*	*	*	*	0	0	*	*	*	*	*	0	0	*	*	*	*	*
chr1	149825265	149826900	-0.145147222768706	-0.208980511273238	0.200892857142857	0.495833333333333	0.444957589191678	0.541225076502304	29	0.0603291308474239	HypoLow	chr1	149825607	149825779	LastExon	-	HIST2H4B	protein_coding	chr1	149825607	149825779	0.10519877675841	1	*	*	*	*	*	0	0	*	*	*	*	*	0	0	*	*	*	*	*	0	0	*	*	*	*	*
chr1	149825265	149826900	-0.145147222768706	-0.208980511273238	0.200892857142857	0.495833333333333	0.444957589191678	0.541225076502304	29	0.0603291308474239	HypoLow	chr1	149825780	149832267	Intron1	-	HIST2H4B	protein_coding	chr1	149825780	149826900	0.685015290519878	0.172652998304301	*	*	*	*	*	0	0	*	*	*	*	*	0	0	*	*	*	*	*	0	0	*	*	*	*	*
chr1	150130041	150131551	0.211538461538462	-0.172730303745715	0.916083916083916	0.694444444444444	0.314874404751527	0.473127315215457	23	0.0073379006221342	HyperLow	chr1	150129210	150131013	Intron4	+	PLEKHO1	protein_coding	chr1	150130041	150131013	0.643708609271523	0.53910149750416	*	*	*	*	*	0	0	*	*	*	*	*	0	0	chr1-150130865:150131695	chr1	150130865	150131695	chr1	150130865	150131013	chr1-150130338:150130554	chr1	150130338	150130554	chr1
chr1	150130041	150131551	0.211538461538462	-0.172730303745715	0.916083916083916	0.694444444444444	0.314874404751527	0.473127315215457	23	0.0073379006221342	HyperLow	chr1	150131014	150131825	LastExon	+	PLEKHO1	protein_coding	chr1	150131014	150131551	0.355629139072848	0.662145499383477	*	*	*	*	*	0	0	*	*	*	*	*	0	0	chr1-150130865:150131695	chr1	150130865	150131695	chr1	150131014	150131551	chr1-150131344:150131694	chr1	150131344	150131694	chr1
chr1	150216266	150220126	0.090909090909091	-0.23478083110573	1	0.857142857142857	0	0.270426041486378	41	0.000928454013019364	HypoLow	*	*	*	InterGenic	*	*	*	*	*	*	*	*	*	*	*	*	*	0	0	*	*	*	*	*	0	0	chr1-150219645:150219795	chr1	150219645	150219795	chr1	150219645	150219795	chr1-150219989:150220173	chr1	150219989	150220173	chr1
chr1	150488677	150489359	0.0263236763236765	0.305796299405166	0.360869565217392	0.121428571428571	0.438402110145667	0.108337070274725	13	0.185593205234634	HypoHigh	chr1	150488539	150490248	Intron1	+	LINC00568	lincRNA	chr1	150488677	150489359	1	0.399063779988297	*	*	*	*	*	0	0	*	*	*	*	*	0	0	chr1-150488660:150489475	chr1	150488660	150489475	chr1	150488677	150489359	chr1-150489171:150489441	chr1	150489171	150489441	chr1
chr1	151103462	151104083	0.319444444444444	0.156023952396341	0.333333333333333	0.0357142857142857	0.486382639009082	0.15633186452976	20	0.00034626082815767	HyperHigh	chr1	151102551	151104086	FirstExon	-	RP11-68I18.10	sense_overlapping	chr1	151103462	151104083	1	0.404560260586319	CpG: 191	chr1	151103685	151106100	chr1	151103685	151104083	*	*	*	*	*	0	0	chr1-151104020:151104375	chr1	151104020	151104375	chr1	151104020	151104083	chr1-151103795:151103956	chr1	151103795	151103956	chr1
chr1	151118271	151118653	0.319444444444444	0.176840931326471	0.635416666666667	0.305555555555555	0.611436041929953	0.484901780684946	15	0.00622365196383898	HyperHigh	chr1	151117500	151119087	FirstExon	-	SEMA6C	protein_coding	chr1	151118271	151118653	1	0.240705734089477	CpG: 113	chr1	151118049	151119373	chr1	151118271	151118653	*	*	*	*	*	0	0	chr1-151118545:151119035	chr1	151118545	151119035	chr1	151118545	151118653	chr1-151118596:151119376	chr1	151118596	151119376	chr1
chr1	151261941	151265891	0.076923076923077	-0.20808802953019	1	0.894444444444444	0.216674140549451	0.306098611351497	45	0.000350833444768851	HypoLow	chr1	151264273	151265509	LastExon	-	PI4KB	protein_coding	chr1	151264273	151265509	0.312911392405063	1	*	*	*	*	*	0	0	*	*	*	*	*	0	0	chr1-151264705:151265555	chr1	151264705	151265555	chr1	151264705	151265509	chr1-151265397:151265993	chr1	151265397	151265993	chr1
chr1	151261941	151265891	0.076923076923077	-0.20808802953019	1	0.894444444444444	0.216674140549451	0.306098611351497	45	0.000350833444768851	HypoLow	chr1	151265510	151266493	Intron10	-	PI4KB	protein_coding	chr1	151265510	151265891	0.0964556962025317	0.387589013224822	*	*	*	*	*	0	0	*	*	*	*	*	0	0	chr1-151265665:151266055	chr1	151265665	151266055	chr1	151265665	151265891	chr1-151265771:151266151	chr1	151265771	151266151	chr1
chr1	151429958	151430481	0.154761904761905	0.257742782841639	0.25	0.117647058823529	0.720321349147894	0.353759374819711	18	0.00169710454506791	HypoHigh	chr1	151414682	151431627	Intron1	-	POGZ	protein_coding	chr1	151429958	151430481	1	0.0308645618176453	*	*	*	*	*	0	0	*	*	*	*	*	0	0	chr1-151430445:151430710	chr1	151430445	151430710	chr1	151430445	151430481	chr1-151430480:151431056	chr1	151430480	151431056	chr1
chr1	151445904	151446463	0.113095238095238	0.301775843137072	0.214285714285714	0	0.486624255858345	0.15284586417988	13	0.0109490933513168	HypoHigh	*	*	*	InterGenic	*	*	*	*	*	*	*	*	CpG: 23	chr1	151445871	151446142	chr1	151445904	151446142	chr1:151445792-151446161	chr1	151445792	151446161	chr1	151445904	151446161	chr1-151446305:151446515	chr1	151446305	151446515	chr1	151446305	151446463	chr1-151446304:151446740	chr1	151446304	151446740	chr1
chr1	151763139	151763853	0.118823529411764	0.260259182589174	0.139423076923077	0.015625	0.418574745587452	0.142218972870857	23	0.000788799094928799	HypoHigh	chr1	151762999	151763999	Promoter	-	TDRKH	protein_coding	chr1	151763139	151763853	1	0.714	CpG: 104	chr1	151762604	151764007	chr1	151763139	151763853	*	*	*	*	*	0	0	chr1-151763400:151764095	chr1	151763400	151764095	chr1	151763400	151763853	chr1-151763851:151764076	chr1	151763851	151764076	chr1
chr1	151763139	151763853	0.118823529411764	0.260259182589174	0.139423076923077	0.015625	0.418574745587452	0.142218972870857	23	0.000788799094928799	HypoHigh	chr1	151762317	151763317	Promoter	+	RP11-98D18.9	antisense	chr1	151763139	151763317	0.249299719887955	0.178	CpG: 104	chr1	151762604	151764007	chr1	151763139	151763317	*	*	*	*	*	0	0	chr1-151762940:151763315	chr1	151762940	151763315	chr1	151763139	151763315	chr1-151763316:151763726	chr1	151763316	151763726	chr1
chr1	151763139	151763853	0.118823529411764	0.260259182589174	0.139423076923077	0.015625	0.418574745587452	0.142218972870857	23	0.000788799094928799	HypoHigh	chr1	151763318	151763721	FirstExon	+	RP11-98D18.9	antisense	chr1	151763318	151763721	0.564425770308123	1	CpG: 104	chr1	151762604	151764007	chr1	151763318	151763721	*	*	*	*	*	0	0	chr1-151763400:151764095	chr1	151763400	151764095	chr1	151763400	151763721	chr1-151763714:151764138	chr1	151763714	151764138	chr1
chr1	151763139	151763853	0.118823529411764	0.260259182589174	0.139423076923077	0.015625	0.418574745587452	0.142218972870857	23	0.000788799094928799	HypoHigh	chr1	151763722	151766290	Intron1	+	RP11-98D18.9	antisense	chr1	151763722	151763853	0.183473389355742	0.05101246105919	CpG: 104	chr1	151762604	151764007	chr1	151763722	151763853	*	*	*	*	*	0	0	chr1-151763400:151764095	chr1	151763400	151764095	chr1	151763722	151763853	chr1-151763851:151764076	chr1	151763851	151764076	chr1
chr1	151803663	151806059	0.211111111111111	-0.199012522981464	0.956439393939394	0.728365384615385	0.343550752746405	0.455319106983058	17	0.000828549038871207	HyperLow	chr1	151801935	151804200	Intron1	-	RORC	protein_coding	chr1	151803663	151804200	0.224123539232053	0.237086092715232	*	*	*	*	*	0	0	*	*	*	*	*	0	0	chr1-151804005:151804175	chr1	151804005	151804175	chr1	151804005	151804175	chr1-151804181:151804611	chr1	151804181	151804611	chr1
chr1	151803663	151806059	0.211111111111111	-0.199012522981464	0.956439393939394	0.728365384615385	0.343550752746405	0.455319106983058	17	0.000828549038871207	HyperLow	chr1	151804201	151804348	FirstExon	-	RORC	protein_coding	chr1	151804201	151804348	0.0613522537562604	1	*	*	*	*	*	0	0	*	*	*	*	*	0	0	chr1-151804205:151804470	chr1	151804205	151804470	chr1	151804205	151804348	chr1-151804200:151804510	chr1	151804200	151804510	chr1
chr1	151803663	151806059	0.211111111111111	-0.199012522981464	0.956439393939394	0.728365384615385	0.343550752746405	0.455319106983058	17	0.000828549038871207	HyperLow	chr1	151804349	151805349	Promoter	-	RORC	protein_coding	chr1	151804349	151805349	0.417362270450751	1	*	*	*	*	*	0	0	*	*	*	*	*	0	0	chr1-151805080:151805355	chr1	151805080	151805355	chr1	151805080	151805349	chr1-151805257:151805607	chr1	151805257	151805607	chr1
chr1	151845179	151845648	0.626525553012967	-0.34111385632402	0.921212121212121	0.307246376811595	0.151415430085132	0.497492676218149	9	0.00525002907542027	HyperLow	*	*	*	InterGenic	*	*	*	*	*	*	*	*	*	*	*	*	*	0	0	*	*	*	*	*	0	0	chr1-151845340:151845610	chr1	151845340	151845610	chr1	151845340	151845610	chr1-151845425:151845521	chr1	151845425	151845521	chr1
chr1	152595781	152596020	0.168831168831169	0.202727575709104	0.307692307692308	0.0869565217391304	0.61412366439237	0.423927407199933	10	0.0635529878094002	HypoHigh	chr1	152595580	152596580	Promoter	-	LCE3A	protein_coding	chr1	152595781	152596020	1	0.239	*	*	*	*	*	0	0	*	*	*	*	*	0	0	chr1-152595745:152596155	chr1	152595745	152596155	chr1	152595781	152596020	chr1-152595809:152595999	chr1	152595809	152595999	chr1
chr1	153563141	153567682	0.042572463768116	-0.226584093174339	1	0.919484702093398	0	0.308660032947284	53	2.45027086350984e-05	HypoLow	*	*	*	InterGenic	*	*	*	*	*	*	*	*	*	*	*	*	*	0	0	*	*	*	*	*	0	0	chr1-153565140:153565515	chr1	153565140	153565515	chr1	153565140	153565515	*	*	*	*	*
chr1	153761957	153763051	0.284210526315789	-0.102032870450498	0.733333333333333	0.421052631578947	0.431820614746107	0.5	30	5.93642600244726e-05	HyperLow	*	*	*	InterGenic	*	*	*	*	*	*	*	*	*	*	*	*	*	0	0	chr1:153762591-153763309	chr1	153762591	153763309	chr1	153762591	153763051	chr1-153762825:153763415	chr1	153762825	153763415	chr1	153762825	153763051	chr1-153763022:153763707	chr1	153763022	153763707	chr1
chr1	154194354	154197708	0.080515297906602	-0.268819411194758	0.96875	0.872282608695652	0.0838763891292745	0.319220137316288	19	0.0123019991960361	HypoLow	chr1	154196557	154197557	Promoter	+	UBAP2L	protein_coding	chr1	154196557	154197557	0.298151460942159	1	*	*	*	*	*	0	0	*	*	*	*	*	0	0	chr1-154196900:154197050	chr1	154196900	154197050	chr1	154196900	154197050	chr1-154197252:154197732	chr1	154197252	154197732	chr1
chr1	154194354	154197708	0.080515297906602	-0.268819411194758	0.96875	0.872282608695652	0.0838763891292745	0.319220137316288	19	0.0123019991960361	HypoLow	chr1	154197558	154197689	FirstExon	+	UBAP2L	protein_coding	chr1	154197558	154197689	0.0390578413834228	1	*	*	*	*	*	0	0	*	*	*	*	*	0	0	*	*	*	*	*	0	0	chr1-154197252:154197732	chr1	154197252	154197732	chr1
chr1	154194354	154197708	0.080515297906602	-0.268819411194758	0.96875	0.872282608695652	0.0838763891292745	0.319220137316288	19	0.0123019991960361	HypoLow	chr1	154197690	154199757	Intron1	+	UBAP2L	protein_coding	chr1	154197690	154197708	0.00536672629695885	0.00870827285921625	*	*	*	*	*	0	0	*	*	*	*	*	0	0	*	*	*	*	*	0	0	chr1-154197252:154197732	chr1	154197252	154197732	chr1
chr1	154315374	154315691	0.356907894736842	-0.141617583271047	0.878676470588236	0.486842105263158	0.321814740105816	0.462764942780706	11	0.0112989519182699	HyperLow	chr1	154315272	154315437	Exon15	+	ATP8B2	protein_coding	chr1	154315374	154315437	0.198738170347003	0.381818181818182	*	*	*	*	*	0	0	*	*	*	*	*	0	0	chr1-154315225:154315435	chr1	154315225	154315435	chr1	154315374	154315435	chr1-154315328:154315658	chr1	154315328	154315658	chr1
chr1	154315374	154315691	0.356907894736842	-0.141617583271047	0.878676470588236	0.486842105263158	0.321814740105816	0.462764942780706	11	0.0112989519182699	HyperLow	chr1	154315438	154315588	Intron15	+	ATP8B2	protein_coding	chr1	154315438	154315588	0.473186119873817	1	*	*	*	*	*	0	0	*	*	*	*	*	0	0	chr1-154315440:154315675	chr1	154315440	154315675	chr1	154315440	154315588	chr1-154315328:154315658	chr1	154315328	154315658	chr1
chr1	154315374	154315691	0.356907894736842	-0.141617583271047	0.878676470588236	0.486842105263158	0.321814740105816	0.462764942780706	11	0.0112989519182699	HyperLow	chr1	154315589	154315777	Exon16	+	ATP8B2	protein_coding	chr1	154315589	154315691	0.321766561514196	0.542553191489362	*	*	*	*	*	0	0	*	*	*	*	*	0	0	chr1-154315440:154315675	chr1	154315440	154315675	chr1	154315589	154315675	chr1-154315328:154315658	chr1	154315328	154315658	chr1
chr1	154700316	154705359	0.0666666666666667	-0.235585742599562	0.947368421052632	0.85	0.197224259527442	0.45698353148489	42	0.000565521673301721	HypoLow	chr1	154698503	154705478	Intron4	-	KCNN3	protein_coding	chr1	154700316	154705359	1	0.723010752688172	*	*	*	*	*	0	0	*	*	*	*	*	0	0	chr1-154704880:154705595	chr1	154704880	154705595	chr1	154704880	154705359	chr1-154703617:154703861	chr1	154703617	154703861	chr1
chr1	154836208	154836480	-0.311111111111111	-0.258228640994849	0.0526315789473684	0.533333333333333	0.167752778258549	0.597493750120193	8	0.0406919393973458	HypoLow	chr1	154794661	154841507	Intron1	-	KCNN3	protein_coding	chr1	154836208	154836480	1	0.00580625880544764	*	*	*	*	*	0	0	*	*	*	*	*	0	0	chr1-154836165:154836615	chr1	154836165	154836615	chr1	154836208	154836480	chr1-154836427:154836612	chr1	154836427	154836612	chr1
chr1	154842745	154843313	0.244418449197861	0.146409611441479	0.696691176470589	0.183333333333334	0.571690730718402	0.370732407567664	15	0.0120143942585435	HyperHigh	chr1	154841508	154842756	FirstExon	-	KCNN3	protein_coding	chr1	154842745	154842756	0.0193661971830986	0.00881410256410256	*	*	*	*	*	0	0	*	*	*	*	*	0	0	chr1-154842705:154842975	chr1	154842705	154842975	chr1	154842745	154842756	chr1-154842748:154842988	chr1	154842748	154842988	chr1
chr1	154842745	154843313	0.244418449197861	0.146409611441479	0.696691176470589	0.183333333333334	0.571690730718402	0.370732407567664	15	0.0120143942585435	HyperHigh	chr1	154842757	154843757	Promoter	-	KCNN3	protein_coding	chr1	154842757	154843313	0.97887323943662	0.556	*	*	*	*	*	0	0	*	*	*	*	*	0	0	chr1-154843145:154843295	chr1	154843145	154843295	chr1	154843145	154843295	chr1-154843298:154843543	chr1	154843298	154843543	chr1
chr1	154856178	154856788	0.663194444444444	0.037487419416412	0.875	0.201388888888889	0.5	0.430195682475504	9	0.00384992387045094	HyperHigh	*	*	*	InterGenic	*	*	*	*	*	*	*	*	*	*	*	*	*	0	0	*	*	*	*	*	0	0	chr1-154856520:154856910	chr1	154856520	154856910	chr1	154856520	154856788	chr1-154856595:154857144	chr1	154856595	154857144	chr1
chr1	155034767	155035231	0.095238095238095	-0.283764977779629	1	0.84	0.287706856188877	0.453654682481227	20	0.011272091511504	HypoLow	chr1	155034721	155034845	Exon22	+	ADAM15	protein_coding	chr1	155034767	155034845	0.168103448275862	0.629032258064516	*	*	*	*	*	0	0	*	*	*	*	*	0	0	chr1-155034745:155034950	chr1	155034745	155034950	chr1	155034767	155034845	chr1-155034822:155035529	chr1	155034822	155035529	chr1
chr1	155034767	155035231	0.095238095238095	-0.283764977779629	1	0.84	0.287706856188877	0.453654682481227	20	0.011272091511504	HypoLow	chr1	155034846	155034935	Intron22	+	ADAM15	protein_coding	chr1	155034846	155034935	0.191810344827586	1	CpG: 125	chr1	155034925	155036578	chr1	155034925	155034935	*	*	*	*	*	0	0	chr1-155034745:155034950	chr1	155034745	155034950	chr1	155034846	155034935	chr1-155034849:155035331	chr1	155034849	155035331	chr1
chr1	155034767	155035231	0.095238095238095	-0.283764977779629	1	0.84	0.287706856188877	0.453654682481227	20	0.011272091511504	HypoLow	chr1	155034936	155035234	LastExon	+	ADAM15	protein_coding	chr1	155034936	155035231	0.635775862068966	0.98993288590604	CpG: 125	chr1	155034925	155036578	chr1	155034936	155035231	*	*	*	*	*	0	0	chr1-155035205:155035455	chr1	155035205	155035455	chr1	155035205	155035231	chr1-155035230:155035425	chr1	155035230	155035425	chr1
chr1	155034767	155035231	0.095238095238095	-0.283764977779629	1	0.84	0.287706856188877	0.453654682481227	20	0.011272091511504	HypoLow	chr1	155035206	155036206	Promoter	+	EFNA4	protein_coding	chr1	155035206	155035231	0.0538793103448276	0.025	CpG: 125	chr1	155034925	155036578	chr1	155035206	155035231	*	*	*	*	*	0	0	chr1-155035205:155035455	chr1	155035205	155035455	chr1	155035206	155035231	chr1-155035230:155035425	chr1	155035230	155035425	chr1
chr1	155034767	155035231	0.095238095238095	-0.283764977779629	1	0.84	0.287706856188877	0.453654682481227	20	0.011272091511504	HypoLow	chr1	155035223	155036223	Promoter	+	EFNA3	protein_coding	chr1	155035223	155035231	0.0172413793103448	0.008	CpG: 125	chr1	155034925	155036578	chr1	155035223	155035231	*	*	*	*	*	0	0	chr1-155035205:155035455	chr1	155035205	155035455	chr1	155035223	155035231	chr1-155035230:155035425	chr1	155035230	155035425	chr1
chr1	155089618	155093927	0.0532271241830067	-0.201537263052885	0.923076923076923	0.878676470588236	0	0.353759374819711	53	0.00469190862302774	HypoLow	*	*	*	InterGenic	*	*	*	*	*	*	*	*	*	*	*	*	*	0	0	*	*	*	*	*	0	0	chr1-155093825:155094055	chr1	155093825	155094055	chr1	155093825	155093927	chr1-155093765:155093901	chr1	155093765	155093901	chr1
chr1	155264661	155265483	0.125	0.203462994183922	0.45	0.272727272727273	0.591952982748214	0.471756316675698	28	0.0865578810765059	HypoHigh	chr1	155264544	155264906	Intron5	-	PKLR	protein_coding	chr1	155264661	155264906	0.298053527980535	0.676795580110497	CpG: 88	chr1	155264318	155265536	chr1	155264661	155264906	*	*	*	*	*	0	0	chr1-155264745:155264935	chr1	155264745	155264935	chr1	155264745	155264906	chr1-155264586:155265622	chr1	155264586	155265622	chr1
chr1	155264661	155265483	0.125	0.203462994183922	0.45	0.272727272727273	0.591952982748214	0.471756316675698	28	0.0865578810765059	HypoHigh	chr1	155264907	155265093	Exon5	-	PKLR	protein_coding	chr1	155264907	155265093	0.226277372262774	1	CpG: 88	chr1	155264318	155265536	chr1	155264907	155265093	*	*	*	*	*	0	0	chr1-155264940:155265555	chr1	155264940	155265555	chr1	155264940	155265093	chr1-155265053:155265663	chr1	155265053	155265663	chr1
chr1	155264661	155265483	0.125	0.203462994183922	0.45	0.272727272727273	0.591952982748214	0.471756316675698	28	0.0865578810765059	HypoHigh	chr1	155265094	155265227	Intron4	-	PKLR	protein_coding	chr1	155265094	155265227	0.161800486618005	1	CpG: 88	chr1	155264318	155265536	chr1	155265094	155265227	*	*	*	*	*	0	0	chr1-155264940:155265555	chr1	155264940	155265555	chr1	155265094	155265227	chr1-155265225:155265515	chr1	155265225	155265515	chr1
chr1	155264661	155265483	0.125	0.203462994183922	0.45	0.272727272727273	0.591952982748214	0.471756316675698	28	0.0865578810765059	HypoHigh	chr1	155265228	155265359	Exon4	-	PKLR	protein_coding	chr1	155265228	155265359	0.159367396593674	1	CpG: 88	chr1	155264318	155265536	chr1	155265228	155265359	*	*	*	*	*	0	0	chr1-155264940:155265555	chr1	155264940	155265555	chr1	155265228	155265359	chr1-155265239:155265729	chr1	155265239	155265729	chr1
chr1	155264661	155265483	0.125	0.203462994183922	0.45	0.272727272727273	0.591952982748214	0.471756316675698	28	0.0865578810765059	HypoHigh	chr1	155265360	155265455	Intron3	-	PKLR	protein_coding	chr1	155265360	155265455	0.115571776155718	1	CpG: 88	chr1	155264318	155265536	chr1	155265360	155265455	*	*	*	*	*	0	0	chr1-155264940:155265555	chr1	155264940	155265555	chr1	155265360	155265455	chr1-155265239:155265729	chr1	155265239	155265729	chr1
chr1	155264661	155265483	0.125	0.203462994183922	0.45	0.272727272727273	0.591952982748214	0.471756316675698	28	0.0865578810765059	HypoHigh	chr1	155265456	155265547	Exon3	-	PKLR	protein_coding	chr1	155265456	155265483	0.0328467153284672	0.296703296703297	CpG: 88	chr1	155264318	155265536	chr1	155265456	155265483	*	*	*	*	*	0	0	chr1-155264940:155265555	chr1	155264940	155265555	chr1	155265456	155265483	chr1-155265239:155265729	chr1	155265239	155265729	chr1
chr1	155484398	155484954	0.208333333333333	-0.270426041486378	1	0.789473684210526	0	0.307309364962454	14	0.000706945196013791	HyperLow	chr1	155452241	155490890	Intron2	-	ASH1L	protein_coding	chr1	155484398	155484954	1	0.0143858832052576	*	*	*	*	*	0	0	chr1:155484519-155484611	chr1	155484519	155484611	chr1	155484519	155484611	chr1-155484945:155485095	chr1	155484945	155485095	chr1	155484945	155484954	chr1-155484917:155485373	chr1	155484917	155485373	chr1
chr1	155715802	155716084	0.333333333333333	0.040147632763249	0.818181818181818	0.285714285714286	0.464049074554845	0.417209722462608	12	0.0300060295364026	HyperHigh	*	*	*	InterGenic	*	*	*	*	*	*	*	*	CpG: 65	chr1	155715297	155715908	chr1	155715802	155715908	*	*	*	*	*	0	0	chr1-155715705:155716335	chr1	155715705	155716335	chr1	155715802	155716084	chr1-155715252:155715848	chr1	155715252	155715848	chr1
chr1	155716107	155721061	0	-0.209392434548259	0.98	0.9375	0	0.306703988156976	57	0.0438396878515615	HypoLow	chr1	155719508	155720524	LastExon	-	GON4L	protein_coding	chr1	155719508	155720524	0.205086798546629	1	*	*	*	*	*	0	0	*	*	*	*	*	0	0	chr1-155720025:155720555	chr1	155720025	155720555	chr1	155720025	155720524	chr1-155720343:155720535	chr1	155720343	155720535	chr1
chr1	155716107	155721061	0	-0.209392434548259	0.98	0.9375	0	0.306703988156976	57	0.0438396878515615	HypoLow	chr1	155720525	155721557	Intron31	-	GON4L	protein_coding	chr1	155720525	155721061	0.108195397658458	0.51937984496124	*	*	*	*	*	0	0	*	*	*	*	*	0	0	chr1-155720025:155720555	chr1	155720025	155720555	chr1	155720525	155720555	chr1-155721060:155721853	chr1	155721060	155721853	chr1
chr1	156041496	156046828	0.074074074074074	-0.255726487724281	0.923076923076923	0.842105263157895	0.270426041486378	0.544035239497006	42	0.0096559328032453	HypoLow	chr1	156041804	156047473	LastExon	-	MEX3A	protein_coding	chr1	156041804	156046828	0.942235558889722	0.88622331980949	CpG: 91	chr1	156046343	156047384	chr1	156046343	156046828	*	*	*	*	*	0	0	chr1-156046605:156046895	chr1	156046605	156046895	chr1	156046605	156046828	chr1-156046819:156047403	chr1	156046819	156047403	chr1
chr1	156119033	156123351	0.076923076923077	-0.216674140549451	1	0.866666666666667	0.15633186452976	0.328808909576947	52	1.20752550142032e-07	HypoLow	chr1	156118809	156119809	Promoter	+	SEMA4A	protein_coding	chr1	156119033	156119809	0.179712830013895	0.776	*	*	*	*	*	0	0	*	*	*	*	*	0	0	chr1-156119525:156119935	chr1	156119525	156119935	chr1	156119525	156119809	chr1-156119707:156120007	chr1	156119707	156120007	chr1
chr1	156119033	156123351	0.076923076923077	-0.216674140549451	1	0.866666666666667	0.15633186452976	0.328808909576947	52	1.20752550142032e-07	HypoLow	chr1	156119810	156119884	FirstExon	+	SEMA4A	protein_coding	chr1	156119810	156119884	0.0171375636868921	1	*	*	*	*	*	0	0	*	*	*	*	*	0	0	chr1-156119525:156119935	chr1	156119525	156119935	chr1	156119810	156119884	chr1-156119707:156120007	chr1	156119707	156120007	chr1
chr1	156119033	156123351	0.076923076923077	-0.216674140549451	1	0.866666666666667	0.15633186452976	0.328808909576947	52	1.20752550142032e-07	HypoLow	chr1	156119885	156124340	Intron1	+	SEMA4A	protein_coding	chr1	156119885	156123351	0.80268642890227	0.778002244668911	*	*	*	*	*	0	0	*	*	*	*	*	0	0	chr1-156123085:156123515	chr1	156123085	156123515	chr1	156123085	156123351	chr1-156123275:156123659	chr1	156123275	156123659	chr1
chr1	156161640	156162866	-0.217855815681903	0.00489592985248202	0.430769230769231	0.716666666666666	0.446263072363596	0.410813666800299	23	0.0104602643671301	HypoHigh	*	*	*	InterGenic	*	*	*	*	*	*	*	*	*	*	*	*	*	0	0	*	*	*	*	*	0	0	chr1-156162740:156162890	chr1	156162740	156162890	chr1	156162740	156162866	chr1-156162864:156164298	chr1	156162864	156164298	chr1
chr1	156552847	156554625	0.0767045454545455	-0.244148482338461	0.946778711484593	0.874509803921569	0.123744108880292	0.384269083954659	25	0.0227885902735286	HypoLow	chr1	156552834	156552962	Exon3	+	TTC24	protein_coding	chr1	156552847	156552962	0.0646794150731159	0.8984375	*	*	*	*	*	0	0	*	*	*	*	*	0	0	chr1-156552945:156553215	chr1	156552945	156553215	chr1	156552945	156552962	chr1-156552380:156552944	chr1	156552380	156552944	chr1
chr1	156552847	156554625	0.0767045454545455	-0.244148482338461	0.946778711484593	0.874509803921569	0.123744108880292	0.384269083954659	25	0.0227885902735286	HypoLow	chr1	156552963	156553129	Intron3	+	TTC24	protein_coding	chr1	156552963	156553129	0.093363329583802	1	*	*	*	*	*	0	0	*	*	*	*	*	0	0	chr1-156552945:156553215	chr1	156552945	156553215	chr1	156552963	156553129	chr1-156552342:156553087	chr1	156552342	156553087	chr1
chr1	156552847	156554625	0.0767045454545455	-0.244148482338461	0.946778711484593	0.874509803921569	0.123744108880292	0.384269083954659	25	0.0227885902735286	HypoLow	chr1	156553130	156553242	Exon4	+	TTC24	protein_coding	chr1	156553130	156553242	0.062992125984252	1	*	*	*	*	*	0	0	*	*	*	*	*	0	0	chr1-156552945:156553215	chr1	156552945	156553215	chr1	156553130	156553215	*	*	*	*	*
chr1	156552847	156554625	0.0767045454545455	-0.244148482338461	0.946778711484593	0.874509803921569	0.123744108880292	0.384269083954659	25	0.0227885902735286	HypoLow	chr1	156553243	156553588	Intron4	+	TTC24	protein_coding	chr1	156553243	156553588	0.194038245219348	1	*	*	*	*	*	0	0	*	*	*	*	*	0	0	chr1-156553405:156553555	chr1	156553405	156553555	chr1	156553405	156553555	chr1-156553515:156555107	chr1	156553515	156555107	chr1
chr1	156552847	156554625	0.0767045454545455	-0.244148482338461	0.946778711484593	0.874509803921569	0.123744108880292	0.384269083954659	25	0.0227885902735286	HypoLow	chr1	156553589	156553687	Exon5	+	TTC24	protein_coding	chr1	156553589	156553687	0.0551181102362205	1	*	*	*	*	*	0	0	*	*	*	*	*	0	0	chr1-156553605:156553850	chr1	156553605	156553850	chr1	156553605	156553687	chr1-156553665:156554139	chr1	156553665	156554139	chr1
chr1	156552847	156554625	0.0767045454545455	-0.244148482338461	0.946778711484593	0.874509803921569	0.123744108880292	0.384269083954659	25	0.0227885902735286	HypoLow	chr1	156553688	156554668	Intron5	+	TTC24	protein_coding	chr1	156553688	156554625	0.526996625421822	0.956122448979592	*	*	*	*	*	0	0	*	*	*	*	*	0	0	chr1-156553900:156554215	chr1	156553900	156554215	chr1	156553900	156554215	chr1-156554618:156555014	chr1	156554618	156555014	chr1
chr1	156611086	156612187	0.635606060606061	0.402074834408922	0.707142857142857	0.0341435185185185	0.634892824354524	0.18920620363032	25	9.05863280922544e-09	HyperHigh	chr1	156610797	156611797	Promoter	-	RP11-284F21.9	lincRNA	chr1	156611086	156611797	0.645776566757493	0.711	CpG: 69	chr1	156611639	156612447	chr1	156611639	156611797	*	*	*	*	*	0	0	chr1-156611505:156612430	chr1	156611505	156612430	chr1	156611505	156611797	chr1-156611772:156613246	chr1	156611772	156613246	chr1
chr1	156611086	156612187	0.635606060606061	0.402074834408922	0.707142857142857	0.0341435185185185	0.634892824354524	0.18920620363032	25	9.05863280922544e-09	HyperHigh	chr1	156610739	156611739	Promoter	+	BCAN	protein_coding	chr1	156611086	156611739	0.593097184377838	0.653	CpG: 69	chr1	156611639	156612447	chr1	156611639	156611739	*	*	*	*	*	0	0	chr1-156611505:156612430	chr1	156611505	156612430	chr1	156611505	156611739	chr1-156611737:156613098	chr1	156611737	156613098	chr1
chr1	156611086	156612187	0.635606060606061	0.402074834408922	0.707142857142857	0.0341435185185185	0.634892824354524	0.18920620363032	25	9.05863280922544e-09	HyperHigh	chr1	156611740	156612067	FirstExon	+	BCAN	protein_coding	chr1	156611740	156612067	0.29700272479564	1	CpG: 69	chr1	156611639	156612447	chr1	156611740	156612067	*	*	*	*	*	0	0	chr1-156611505:156612430	chr1	156611505	156612430	chr1	156611740	156612067	chr1-156612058:156612622	chr1	156612058	156612622	chr1
chr1	156611086	156612187	0.635606060606061	0.402074834408922	0.707142857142857	0.0341435185185185	0.634892824354524	0.18920620363032	25	9.05863280922544e-09	HyperHigh	chr1	156612068	156615838	Intron1	+	BCAN	protein_coding	chr1	156612068	156612187	0.108083560399637	0.0315649867374005	CpG: 69	chr1	156611639	156612447	chr1	156612068	156612187	*	*	*	*	*	0	0	chr1-156611505:156612430	chr1	156611505	156612430	chr1	156612068	156612187	chr1-156612129:156612633	chr1	156612129	156612633	chr1
chr1	156611086	156612187	0.635606060606061	0.402074834408922	0.707142857142857	0.0341435185185185	0.634892824354524	0.18920620363032	25	9.05863280922544e-09	HyperHigh	chr1	156611458	156614679	FirstExon	-	RP11-284F21.10	antisense	chr1	156611458	156612187	0.662125340599455	0.226327227569078	CpG: 69	chr1	156611639	156612447	chr1	156611639	156612187	*	*	*	*	*	0	0	chr1-156611505:156612430	chr1	156611505	156612430	chr1	156611505	156612187	chr1-156612129:156612633	chr1	156612129	156612633	chr1
chr1	156612203	156626030	0.146428571428571	-0.200409331377805	0.95	0.787593984962406	0.216674140549451	0.468546354076522	141	5.39867011901044e-13	HypoLow	chr1	156612068	156615838	Intron1	+	BCAN	protein_coding	chr1	156612203	156615838	0.262891444275692	0.964190981432361	CpG: 69	chr1	156611639	156612447	chr1	156612203	156612447	*	*	*	*	*	0	0	chr1-156615665:156616415	chr1	156615665	156616415	chr1	156615665	156615838	chr1-156615755:156615985	chr1	156615755	156615985	chr1
chr1	156612203	156626030	0.146428571428571	-0.200409331377805	0.95	0.787593984962406	0.216674140549451	0.468546354076522	141	5.39867011901044e-13	HypoLow	chr1	156615839	156615937	Exon2	+	BCAN	protein_coding	chr1	156615839	156615937	0.00708758226657988	1	*	*	*	*	*	0	0	*	*	*	*	*	0	0	chr1-156615665:156616415	chr1	156615665	156616415	chr1	156615839	156615937	chr1-156615755:156615985	chr1	156615755	156615985	chr1
chr1	156612203	156626030	0.146428571428571	-0.200409331377805	0.95	0.787593984962406	0.216674140549451	0.468546354076522	141	5.39867011901044e-13	HypoLow	chr1	156615938	156616592	Intron2	+	BCAN	protein_coding	chr1	156615938	156616592	0.0472987632892167	1	CpG: 50	chr1	156616553	156616946	chr1	156616553	156616592	*	*	*	*	*	0	0	chr1-156616525:156616910	chr1	156616525	156616910	chr1	156616525	156616592	chr1-156616587:156616971	chr1	156616587	156616971	chr1
chr1	156612203	156626030	0.146428571428571	-0.200409331377805	0.95	0.787593984962406	0.216674140549451	0.468546354076522	141	5.39867011901044e-13	HypoLow	chr1	156616593	156616967	Exon3	+	BCAN	protein_coding	chr1	156616593	156616967	0.0270485282418457	1	CpG: 50	chr1	156616553	156616946	chr1	156616593	156616946	*	*	*	*	*	0	0	chr1-156616525:156616910	chr1	156616525	156616910	chr1	156616593	156616910	chr1-156616747:156617131	chr1	156616747	156617131	chr1
chr1	156612203	156626030	0.146428571428571	-0.200409331377805	0.95	0.787593984962406	0.216674140549451	0.468546354076522	141	5.39867011901044e-13	HypoLow	chr1	156616968	156617299	Intron3	+	BCAN	protein_coding	chr1	156616968	156617299	0.0239386707167137	1	*	*	*	*	*	0	0	*	*	*	*	*	0	0	chr1-156617285:156617455	chr1	156617285	156617455	chr1	156617285	156617299	chr1-156617271:156617997	chr1	156617271	156617997	chr1
chr1	156612203	156626030	0.146428571428571	-0.200409331377805	0.95	0.787593984962406	0.216674140549451	0.468546354076522	141	5.39867011901044e-13	HypoLow	chr1	156617300	156617474	Exon4	+	BCAN	protein_coding	chr1	156617300	156617474	0.0125840746365806	1	*	*	*	*	*	0	0	*	*	*	*	*	0	0	chr1-156617465:156618095	chr1	156617465	156618095	chr1	156617465	156617474	chr1-156617271:156617997	chr1	156617271	156617997	chr1
chr1	156612203	156626030	0.146428571428571	-0.200409331377805	0.95	0.787593984962406	0.216674140549451	0.468546354076522	141	5.39867011901044e-13	HypoLow	chr1	156617475	156617774	Intron4	+	BCAN	protein_coding	chr1	156617475	156617774	0.0216243581398713	1	*	*	*	*	*	0	0	*	*	*	*	*	0	0	chr1-156617465:156618095	chr1	156617465	156618095	chr1	156617475	156617774	chr1-156617271:156617997	chr1	156617271	156617997	chr1
chr1	156612203	156626030	0.146428571428571	-0.200409331377805	0.95	0.787593984962406	0.216674140549451	0.468546354076522	141	5.39867011901044e-13	HypoLow	chr1	156617775	156617902	Exon5	+	BCAN	protein_coding	chr1	156617775	156617902	0.00918492803934331	1	*	*	*	*	*	0	0	*	*	*	*	*	0	0	chr1-156617465:156618095	chr1	156617465	156618095	chr1	156617775	156617902	chr1-156617271:156617997	chr1	156617271	156617997	chr1
chr1	156612203	156626030	0.146428571428571	-0.200409331377805	0.95	0.787593984962406	0.216674140549451	0.468546354076522	141	5.39867011901044e-13	HypoLow	chr1	156617903	156618359	Intron5	+	BCAN	protein_coding	chr1	156617903	156618359	0.0329789542200043	1	*	*	*	*	*	0	0	*	*	*	*	*	0	0	chr1-156618125:156618415	chr1	156618125	156618415	chr1	156618125	156618359	chr1-156618341:156619047	chr1	156618341	156619047	chr1
chr1	156612203	156626030	0.146428571428571	-0.200409331377805	0.95	0.787593984962406	0.216674140549451	0.468546354076522	141	5.39867011901044e-13	HypoLow	chr1	156618360	156618653	Exon6	+	BCAN	protein_coding	chr1	156618360	156618653	0.0211904245317133	1	*	*	*	*	*	0	0	*	*	*	*	*	0	0	chr1-156618465:156618655	chr1	156618465	156618655	chr1	156618465	156618653	chr1-156618647:156619131	chr1	156618647	156619131	chr1
chr1	156612203	156626030	0.146428571428571	-0.200409331377805	0.95	0.787593984962406	0.216674140549451	0.468546354076522	141	5.39867011901044e-13	HypoLow	chr1	156618654	156621247	Intron6	+	BCAN	protein_coding	chr1	156618654	156621247	0.187531640992262	1	*	*	*	*	*	0	0	*	*	*	*	*	0	0	chr1-156621205:156621355	chr1	156621205	156621355	chr1	156621205	156621247	chr1-156621115:156621359	chr1	156621115	156621359	chr1
chr1	156612203	156626030	0.146428571428571	-0.200409331377805	0.95	0.787593984962406	0.216674140549451	0.468546354076522	141	5.39867011901044e-13	HypoLow	chr1	156621248	156621481	Exon7	+	BCAN	protein_coding	chr1	156621248	156621481	0.0168510884501338	1	*	*	*	*	*	0	0	*	*	*	*	*	0	0	chr1-156621205:156621355	chr1	156621205	156621355	chr1	156621248	156621355	chr1-156621408:156622557	chr1	156621408	156622557	chr1
chr1	156612203	156626030	0.146428571428571	-0.200409331377805	0.95	0.787593984962406	0.216674140549451	0.468546354076522	141	5.39867011901044e-13	HypoLow	chr1	156621482	156622039	Intron7	+	BCAN	protein_coding	chr1	156621482	156622039	0.0402835032906632	1	*	*	*	*	*	0	0	*	*	*	*	*	0	0	chr1-156621860:156622130	chr1	156621860	156622130	chr1	156621860	156622039	chr1-156621875:156622319	chr1	156621875	156622319	chr1
chr1	156612203	156626030	0.146428571428571	-0.200409331377805	0.95	0.787593984962406	0.216674140549451	0.468546354076522	141	5.39867011901044e-13	HypoLow	chr1	156622040	156622684	Exon8	+	BCAN	protein_coding	chr1	156622040	156622684	0.0465755406089535	1	*	*	*	*	*	0	0	*	*	*	*	*	0	0	chr1-156622165:156622395	chr1	156622165	156622395	chr1	156622165	156622395	chr1-156622543:156622779	chr1	156622543	156622779	chr1
chr1	156612203	156626030	0.146428571428571	-0.200409331377805	0.95	0.787593984962406	0.216674140549451	0.468546354076522	141	5.39867011901044e-13	HypoLow	chr1	156622685	156626073	Intron8	+	BCAN	protein_coding	chr1	156622685	156626030	0.241917986548058	0.987308146399056	*	*	*	*	*	0	0	*	*	*	*	*	0	0	chr1-156625785:156626015	chr1	156625785	156626015	chr1	156625785	156626015	chr1-156625929:156626588	chr1	156625929	156626588	chr1
chr1	156612203	156626030	0.146428571428571	-0.200409331377805	0.95	0.787593984962406	0.216674140549451	0.468546354076522	141	5.39867011901044e-13	HypoLow	chr1	156611458	156614679	FirstExon	-	RP11-284F21.10	antisense	chr1	156612203	156614679	0.179069935633181	0.768705371002794	CpG: 69	chr1	156611639	156612447	chr1	156612203	156612447	*	*	*	*	*	0	0	chr1-156614565:156614815	chr1	156614565	156614815	chr1	156614565	156614679	chr1-156614533:156614662	chr1	156614533	156614662	chr1
chr1	156612203	156626030	0.146428571428571	-0.200409331377805	0.95	0.787593984962406	0.216674140549451	0.468546354076522	141	5.39867011901044e-13	HypoLow	chr1	156614680	156615680	Promoter	-	RP11-284F21.10	antisense	chr1	156614680	156615680	0.0723222680263253	1	*	*	*	*	*	0	0	*	*	*	*	*	0	0	chr1-156615665:156616415	chr1	156615665	156616415	chr1	156615665	156615680	chr1-156615678:156618275	chr1	156615678	156618275	chr1
chr1	156612203	156626030	0.146428571428571	-0.200409331377805	0.95	0.787593984962406	0.216674140549451	0.468546354076522	141	5.39867011901044e-13	HypoLow	chr1	156616299	156616946	LastExon	-	RP11-284F21.7	antisense	chr1	156616299	156616946	0.0467925074130325	1	CpG: 50	chr1	156616553	156616946	chr1	156616553	156616946	*	*	*	*	*	0	0	chr1-156616525:156616910	chr1	156616525	156616910	chr1	156616525	156616910	chr1-156616747:156617131	chr1	156616747	156617131	chr1
chr1	156612203	156626030	0.146428571428571	-0.200409331377805	0.95	0.787593984962406	0.216674140549451	0.468546354076522	141	5.39867011901044e-13	HypoLow	chr1	156616947	156631106	Intron1	-	RP11-284F21.7	antisense	chr1	156616947	156626030	0.656903160483113	0.641500105939685	*	*	*	*	*	0	0	*	*	*	*	*	0	0	chr1-156625785:156626015	chr1	156625785	156626015	chr1	156625785	156626015	chr1-156625929:156626588	chr1	156625929	156626588	chr1
chr1	156626135	156627077	0.35	0.239094220841842	0.625	0.0625	0.673414735717919	0.315457645328481	24	2.60910293356343e-06	HyperHigh	chr1	156626074	156626181	Exon9	+	BCAN	protein_coding	chr1	156626135	156626181	0.0488322717622081	0.429906542056075	*	*	*	*	*	0	0	*	*	*	*	*	0	0	chr1-156626045:156626295	chr1	156626045	156626295	chr1	156626135	156626181	chr1-156626161:156626437	chr1	156626161	156626437	chr1
chr1	156626135	156627077	0.35	0.239094220841842	0.625	0.0625	0.673414735717919	0.315457645328481	24	2.60910293356343e-06	HyperHigh	chr1	156626182	156626729	Intron9	+	BCAN	protein_coding	chr1	156626182	156626729	0.58067940552017	1	*	*	*	*	*	0	0	*	*	*	*	*	0	0	chr1-156626505:156626995	chr1	156626505	156626995	chr1	156626505	156626729	chr1-156626680:156627545	chr1	156626680	156627545	chr1
chr1	156626135	156627077	0.35	0.239094220841842	0.625	0.0625	0.673414735717919	0.315457645328481	24	2.60910293356343e-06	HyperHigh	chr1	156626730	156626888	Exon10	+	BCAN	protein_coding	chr1	156626730	156626888	0.167728237791932	1	*	*	*	*	*	0	0	*	*	*	*	*	0	0	chr1-156626505:156626995	chr1	156626505	156626995	chr1	156626730	156626888	chr1-156626838:156627665	chr1	156626838	156627665	chr1
chr1	156626135	156627077	0.35	0.239094220841842	0.625	0.0625	0.673414735717919	0.315457645328481	24	2.60910293356343e-06	HyperHigh	chr1	156626889	156627466	Intron10	+	BCAN	protein_coding	chr1	156626889	156627077	0.199575371549894	0.325823223570191	*	*	*	*	*	0	0	*	*	*	*	*	0	0	chr1-156627005:156627215	chr1	156627005	156627215	chr1	156627005	156627077	chr1-156627068:156627876	chr1	156627068	156627876	chr1
chr1	156626135	156627077	0.35	0.239094220841842	0.625	0.0625	0.673414735717919	0.315457645328481	24	2.60910293356343e-06	HyperHigh	chr1	156616947	156631106	Intron1	-	RP11-284F21.7	antisense	chr1	156626135	156627077	1	0.06653012218377	*	*	*	*	*	0	0	*	*	*	*	*	0	0	chr1-156627005:156627215	chr1	156627005	156627215	chr1	156627005	156627077	chr1-156627068:156627876	chr1	156627068	156627876	chr1
chr1	156659828	156660552	0.1875	0.240642698295787	0.307692307692308	0	0.323650198151556	0.15633186452976	14	0.0304259777261303	HypoHigh	chr1	156657487	156660673	LastExon	-	RP11-66D17.3	lincRNA	chr1	156659828	156660552	1	0.227244193345888	*	*	*	*	*	0	0	*	*	*	*	*	0	0	chr1-156660180:156660470	chr1	156660180	156660470	chr1	156660180	156660470	chr1-156660250:156661015	chr1	156660250	156661015	chr1
chr1	157248675	157253527	0.08	-0.213950693201979	0.916666666666667	0.777777777777778	0.240642698295787	0.472765278018163	40	0.00398651392721826	HypoLow	chr1	157249505	157250505	Promoter	+	RP11-85G21.3	lincRNA	chr1	157249505	157250505	0.206100577081616	1	*	*	*	*	*	0	0	chr1:157249264-157249609	chr1	157249264	157249609	chr1	157249505	157249609	chr1-157249725:157249875	chr1	157249725	157249875	chr1	157249725	157249875	chr1-157249494:157249576	chr1	157249494	157249576	chr1
chr1	157248675	157253527	0.08	-0.213950693201979	0.916666666666667	0.777777777777778	0.240642698295787	0.472765278018163	40	0.00398651392721826	HypoLow	chr1	157250506	157250643	FirstExon	+	RP11-85G21.3	lincRNA	chr1	157250506	157250643	0.0282357790601814	1	*	*	*	*	*	0	0	*	*	*	*	*	0	0	*	*	*	*	*	0	0	*	*	*	*	*
chr1	157248675	157253527	0.08	-0.213950693201979	0.916666666666667	0.777777777777778	0.240642698295787	0.472765278018163	40	0.00398651392721826	HypoLow	chr1	157250644	157252367	Intron1	+	RP11-85G21.3	lincRNA	chr1	157250644	157252367	0.355111294311624	1	*	*	*	*	*	0	0	*	*	*	*	*	0	0	chr1-157251145:157251370	chr1	157251145	157251370	chr1	157251145	157251370	chr1-157252298:157252678	chr1	157252298	157252678	chr1
chr1	157248675	157253527	0.08	-0.213950693201979	0.916666666666667	0.777777777777778	0.240642698295787	0.472765278018163	40	0.00398651392721826	HypoLow	chr1	157252368	157252858	LastExon	+	RP11-85G21.3	lincRNA	chr1	157252368	157252858	0.100989282769992	1	*	*	*	*	*	0	0	*	*	*	*	*	0	0	*	*	*	*	*	0	0	chr1-157252759:157253035	chr1	157252759	157253035	chr1
chr1	158024435	158026132	0.129186602870814	-0.214152942904075	0.933333333333333	0.785714285714286	0.181188147733199	0.459594497828725	24	0.00636791380802384	HypoLow	chr1	157963523	158045902	Intron1	+	KIRREL	protein_coding	chr1	158024435	158026132	1	0.0205999101712815	*	*	*	*	*	0	0	*	*	*	*	*	0	0	chr1-158025665:158025950	chr1	158025665	158025950	chr1	158025665	158025950	*	*	*	*	*
chr1	158147392	158147991	0.269230769230769	0.017869653490538	0.636363636363636	0.266666666666667	0.482938545241728	0.538110278386422	20	0.00815460068610853	HyperHigh	*	*	*	InterGenic	*	*	*	*	*	*	*	*	CpG: 37	chr1	158147433	158147854	chr1	158147433	158147854	chr1:158147244-158147839	chr1	158147244	158147839	chr1	158147392	158147839	chr1-158147980:158147990	chr1	158147980	158147990	chr1	158147980	158147990	chr1-158147876:158148219	chr1	158147876	158148219	chr1
chr1	158918548	158921366	0.0770534290271135	-0.23216371506744	0.970588235294118	0.854497354497354	0.228658419422619	0.389185496456675	27	0.0100869858608858	HypoLow	chr1	158914833	158943436	Intron7	+	PYHIN1	protein_coding	chr1	158918548	158921366	1	0.0985211341467678	*	*	*	*	*	0	0	*	*	*	*	*	0	0	*	*	*	*	*	0	0	chr1-158920837:158921220	chr1	158920837	158921220	chr1
chr1	159496312	159506620	0.0707070707070709	-0.201210753610957	0.933333333333333	0.857142857142857	0.240642698295787	0.396240625180289	44	0.0012210997333403	HypoLow	chr1	159504793	159505842	FirstExon	-	OR10J5	protein_coding	chr1	159504793	159505842	0.101765618936748	1	*	*	*	*	*	0	0	*	*	*	*	*	0	0	*	*	*	*	*	0	0	*	*	*	*	*
chr1	159496312	159506620	0.0707070707070709	-0.201210753610957	0.933333333333333	0.857142857142857	0.240642698295787	0.396240625180289	44	0.0012210997333403	HypoLow	chr1	159505843	159506843	Promoter	-	OR10J5	protein_coding	chr1	159505843	159506620	0.0753783469150175	0.777	*	*	*	*	*	0	0	*	*	*	*	*	0	0	*	*	*	*	*	0	0	*	*	*	*	*
chr1	160000781	160001001	0.178571428571429	0.240642698295787	0.25	0.0714285714285714	0.45698353148489	0.228012811879681	8	0.00716238345574619	HypoHigh	chr1	159997462	160001783	FirstExon	-	PIGM	protein_coding	chr1	160000781	160001001	1	0.0509141402453136	*	*	*	*	*	0	0	*	*	*	*	*	0	0	chr1-160000565:160002215	chr1	160000565	160002215	chr1	160000781	160001001	chr1-160000983:160002090	chr1	160000983	160002090	chr1
chr1	160666201	160673079	0.087121212121212	-0.208011126801186	0.912878787878788	0.811011904761905	0.18920620363032	0.372504999487784	67	0.00129864871835406	HypoLow	chr1	160654980	160681471	Intron1	-	CD48	protein_coding	chr1	160666201	160673079	1	0.259635347853988	*	*	*	*	*	0	0	*	*	*	*	*	0	0	chr1-160669185:160669410	chr1	160669185	160669410	chr1	160669185	160669410	chr1-160668041:160669066	chr1	160668041	160669066	chr1
chr1	160835470	160850050	0.076923076923077	-0.213676418827735	1	0.862852664576802	0.130414521209752	0.37348427823042	107	2.08302192765884e-08	HypoLow	chr1	160846329	160846606	LastExon	-	ITLN1	protein_coding	chr1	160846329	160846606	0.0189986282578875	1	*	*	*	*	*	0	0	*	*	*	*	*	0	0	chr1-160846065:160846475	chr1	160846065	160846475	chr1	160846329	160846475	chr1-160846129:160846505	chr1	160846129	160846505	chr1
chr1	160835470	160850050	0.076923076923077	-0.213676418827735	1	0.862852664576802	0.130414521209752	0.37348427823042	107	2.08302192765884e-08	HypoLow	chr1	160846607	160849100	Intron7	-	ITLN1	protein_coding	chr1	160846607	160849100	0.170987654320988	1	*	*	*	*	*	0	0	*	*	*	*	*	0	0	chr1-160848765:160849195	chr1	160848765	160849195	chr1	160848765	160849100	chr1-160847034:160847304	chr1	160847034	160847304	chr1
chr1	160835470	160850050	0.076923076923077	-0.213676418827735	1	0.862852664576802	0.130414521209752	0.37348427823042	107	2.08302192765884e-08	HypoLow	chr1	160849101	160849204	Exon7	-	ITLN1	protein_coding	chr1	160849101	160849204	0.00706447187928669	1	*	*	*	*	*	0	0	*	*	*	*	*	0	0	chr1-160848765:160849195	chr1	160848765	160849195	chr1	160849101	160849195	*	*	*	*	*
chr1	160835470	160850050	0.076923076923077	-0.213676418827735	1	0.862852664576802	0.130414521209752	0.37348427823042	107	2.08302192765884e-08	HypoLow	chr1	160849205	160850377	Intron6	-	ITLN1	protein_coding	chr1	160849205	160850050	0.0579561042524005	0.72098976109215	*	*	*	*	*	0	0	*	*	*	*	*	0	0	*	*	*	*	*	0	0	chr1-160850029:160850573	chr1	160850029	160850573	chr1
chr1	160951170	160951657	0.347826086956522	-0.299268506630254	0.933333333333333	0.55	0.385593216482346	0.682146448223672	18	0.000757768148819602	HyperLow	*	*	*	InterGenic	*	*	*	*	*	*	*	*	*	*	*	*	*	0	0	*	*	*	*	*	0	0	chr1-160951240:160951610	chr1	160951240	160951610	chr1	160951240	160951610	chr1-160951495:160951671	chr1	160951495	160951671	chr1
chr1	161215449	161218656	0.0588235294117651	-0.255178695272594	1	0.909090909090909	0.112430022205671	0.365265085000311	36	2.16776098810269e-05	HypoLow	*	*	*	InterGenic	*	*	*	*	*	*	*	*	*	*	*	*	*	0	0	*	*	*	*	*	0	0	chr1-161218165:161218455	chr1	161218165	161218455	chr1	161218165	161218455	chr1-161216166:161216586	chr1	161216166	161216586	chr1
chr1	161228338	161229289	0.188235294117647	0.209905340088677	0.366666666666667	0.2	0.61412366439237	0.421269724627849	28	0.0203475010419458	HypoHigh	chr1	161227516	161228516	Promoter	+	PCP4L1	protein_coding	chr1	161228338	161228516	0.187171398527865	0.178	CpG: 54	chr1	161228477	161229028	chr1	161228477	161228516	*	*	*	*	*	0	0	chr1-161228305:161228835	chr1	161228305	161228835	chr1	161228338	161228516	chr1-161228501:161228937	chr1	161228501	161228937	chr1
chr1	161228338	161229289	0.188235294117647	0.209905340088677	0.366666666666667	0.2	0.61412366439237	0.421269724627849	28	0.0203475010419458	HypoHigh	chr1	161228517	161228773	FirstExon	+	PCP4L1	protein_coding	chr1	161228517	161228773	0.26919032597266	1	CpG: 54	chr1	161228477	161229028	chr1	161228517	161228773	*	*	*	*	*	0	0	chr1-161228305:161228835	chr1	161228305	161228835	chr1	161228517	161228773	chr1-161228618:161229940	chr1	161228618	161229940	chr1
chr1	161228338	161229289	0.188235294117647	0.209905340088677	0.366666666666667	0.2	0.61412366439237	0.421269724627849	28	0.0203475010419458	HypoHigh	chr1	161228774	161253457	Intron1	+	PCP4L1	protein_coding	chr1	161228774	161229289	0.541535226077813	0.0208645626544585	CpG: 54	chr1	161228477	161229028	chr1	161228774	161229028	*	*	*	*	*	0	0	chr1-161228945:161229350	chr1	161228945	161229350	chr1	161228945	161229289	chr1-161228618:161229940	chr1	161228618	161229940	chr1
chr1	161664612	161669653	0.115384615384615	-0.288618872485741	1	0.842105263157895	0.181188147733199	0.479751339070625	26	4.81206267485645e-05	HypoLow	*	*	*	InterGenic	*	*	*	*	*	*	*	*	*	*	*	*	*	0	0	*	*	*	*	*	0	0	*	*	*	*	*	0	0	chr1-161668504:161668960	chr1	161668504	161668960	chr1
chr1	163097941	163110180	0.125178062678063	-0.23400164914029	0.933333333333333	0.794736842105263	0.306098611351497	0.475636056389526	51	0.000531283382061269	HypoLow	*	*	*	InterGenic	*	*	*	*	*	*	*	*	*	*	*	*	*	0	0	chr1:163107964-163108181	chr1	163107964	163108181	chr1	163107964	163108181	chr1-163103660:163103850	chr1	163103660	163103850	chr1	163103660	163103850	chr1-163102910:163103180	chr1	163102910	163103180	chr1
chr1	163201345	163207968	0.080128205128205	-0.259648786364903	0.9375	0.886752136752137	0.181188147733199	0.436319524342446	33	0.00412422166407426	HypoLow	chr1	163138159	163276022	Intron3	-	RGS5	protein_coding	chr1	163201345	163207968	1	0.0480404459499648	*	*	*	*	*	0	0	*	*	*	*	*	0	0	chr1-163207525:163207875	chr1	163207525	163207875	chr1	163207525	163207875	chr1-163204930:163205346	chr1	163204930	163205346	chr1
chr1	163944801	163948523	0.118973905351614	-0.280685660860964	0.925824175824176	0.824898785425102	0.182488518892995	0.516041728034369	33	0.00759731809281259	HypoLow	*	*	*	InterGenic	*	*	*	*	*	*	*	*	*	*	*	*	*	0	0	*	*	*	*	*	0	0	*	*	*	*	*	0	0	*	*	*	*	*
chr1	165551605	165557710	0.107142857142857	-0.222222222222222	0.9375	0.8125	0.270426041486378	0.507309364962454	42	0.000235633033175335	HypoLow	chr1	165551393	165552393	Promoter	-	RP11-280O1.2	antisense	chr1	165551605	165552393	0.129074529074529	0.788	*	*	*	*	*	0	0	*	*	*	*	*	0	0	*	*	*	*	*	0	0	*	*	*	*	*
chr1	166134325	166135616	0.218045112781955	0.228530447910024	0.285714285714286	0.0666666666666667	0.459594497828725	0.216674140549451	36	0.000621980089212188	HyperHigh	chr1	166040001	166135222	Intron2	-	FAM78B	protein_coding	chr1	166134325	166135222	0.694810224632068	0.00942019092427091	CpG: 188	chr1	166134258	166136448	chr1	166134325	166135222	*	*	*	*	*	0	0	chr1-166134185:166135495	chr1	166134185	166135495	chr1	166134325	166135222	chr1-166135211:166135368	chr1	166135211	166135368	chr1
chr1	166134325	166135616	0.218045112781955	0.228530447910024	0.285714285714286	0.0666666666666667	0.459594497828725	0.216674140549451	36	0.000621980089212188	HyperHigh	chr1	166135223	166135956	Exon2	-	FAM78B	protein_coding	chr1	166135223	166135616	0.304415182029435	0.536152796725784	CpG: 188	chr1	166134258	166136448	chr1	166135223	166135616	*	*	*	*	*	0	0	chr1-166135505:166135835	chr1	166135505	166135835	chr1	166135505	166135616	chr1-166135590:166135872	chr1	166135590	166135872	chr1
chr1	166134325	166135616	0.218045112781955	0.228530447910024	0.285714285714286	0.0666666666666667	0.459594497828725	0.216674140549451	36	0.000621980089212188	HyperHigh	chr1	166134027	166134332	FirstExon	-	RP11-9L18.3	sense_intronic	chr1	166134325	166134332	0.00542215336948102	0.0229508196721311	CpG: 188	chr1	166134258	166136448	chr1	166134325	166134332	*	*	*	*	*	0	0	chr1-166134185:166135495	chr1	166134185	166135495	chr1	166134325	166134332	chr1-166134329:166135028	chr1	166134329	166135028	chr1
chr1	166134325	166135616	0.218045112781955	0.228530447910024	0.285714285714286	0.0666666666666667	0.459594497828725	0.216674140549451	36	0.000621980089212188	HyperHigh	chr1	166134333	166135333	Promoter	-	RP11-9L18.3	sense_intronic	chr1	166134333	166135333	0.774593338497289	1	CpG: 188	chr1	166134258	166136448	chr1	166134333	166135333	*	*	*	*	*	0	0	chr1-166134185:166135495	chr1	166134185	166135495	chr1	166134333	166135333	chr1-166135211:166135368	chr1	166135211	166135368	chr1
chr1	166809525	166810539	0.552744708994709	-0.06828680794698	0.784615384615384	0.0993431855500821	0.437096626973749	0.359365407145205	17	0.000175833927747932	HyperHigh	chr1	166808842	166810191	Intron1	+	POGK	protein_coding	chr1	166809525	166810191	0.656804733727811	0.493699036323202	*	*	*	*	*	0	0	*	*	*	*	*	0	0	chr1-166809600:166810575	chr1	166809600	166810575	chr1	166809600	166810191	chr1-166810125:166810581	chr1	166810125	166810581	chr1
chr1	166809525	166810539	0.552744708994709	-0.06828680794698	0.784615384615384	0.0993431855500821	0.437096626973749	0.359365407145205	17	0.000175833927747932	HyperHigh	chr1	166810192	166810325	Exon2	+	POGK	protein_coding	chr1	166810192	166810325	0.131163708086785	1	*	*	*	*	*	0	0	*	*	*	*	*	0	0	chr1-166809600:166810575	chr1	166809600	166810575	chr1	166810192	166810325	chr1-166810233:166810629	chr1	166810233	166810629	chr1
chr1	166809525	166810539	0.552744708994709	-0.06828680794698	0.784615384615384	0.0993431855500821	0.437096626973749	0.359365407145205	17	0.000175833927747932	HyperHigh	chr1	166810326	166815848	Intron2	+	POGK	protein_coding	chr1	166810326	166810539	0.210059171597633	0.0385729808040565	*	*	*	*	*	0	0	*	*	*	*	*	0	0	chr1-166809600:166810575	chr1	166809600	166810575	chr1	166810326	166810539	chr1-166810436:166811146	chr1	166810436	166811146	chr1
chr1	167090269	167091266	0.235294117647059	0.035852883000201	0.444444444444444	0.111111111111111	0.385593216482346	0.315457645328481	30	0.00273982500368953	HyperHigh	chr1	167088704	167095023	Intron5	+	DUSP27	protein_coding	chr1	167090269	167091266	1	0.157778129450862	CpG: 42	chr1	167090575	167091010	chr1	167090575	167091010	*	*	*	*	*	0	0	chr1-167090585:167092090	chr1	167090585	167092090	chr1	167090585	167091266	chr1-167091192:167091472	chr1	167091192	167091472	chr1
chr1	167407856	167409197	0.303030303030303	-0.405213910680142	1	0.608695652173913	0.167752778258549	0.552580908834963	36	1.45740294183089e-10	HyperLow	chr1	167407807	167407887	Exon4	-	CD247	protein_coding	chr1	167407856	167407887	0.023117076808352	0.3875	*	*	*	*	*	0	0	*	*	*	*	*	0	0	*	*	*	*	*	0	0	*	*	*	*	*
chr1	167407856	167409197	0.303030303030303	-0.405213910680142	1	0.608695652173913	0.167752778258549	0.552580908834963	36	1.45740294183089e-10	HyperLow	chr1	167407888	167408580	Intron3	-	CD247	protein_coding	chr1	167407888	167408580	0.516032811334825	1	CpG: 50	chr1	167408512	167409137	chr1	167408512	167408580	*	*	*	*	*	0	0	chr1-167408525:167409195	chr1	167408525	167409195	chr1	167408525	167408580	chr1-167408571:167409135	chr1	167408571	167409135	chr1
chr1	167407856	167409197	0.303030303030303	-0.405213910680142	1	0.608695652173913	0.167752778258549	0.552580908834963	36	1.45740294183089e-10	HyperLow	chr1	167408581	167408637	Exon3	-	CD247	protein_coding	chr1	167408581	167408637	0.0417598806860552	1	CpG: 50	chr1	167408512	167409137	chr1	167408581	167408637	*	*	*	*	*	0	0	chr1-167408525:167409195	chr1	167408525	167409195	chr1	167408581	167408637	chr1-167408636:167409346	chr1	167408636	167409346	chr1
chr1	167407856	167409197	0.303030303030303	-0.405213910680142	1	0.608695652173913	0.167752778258549	0.552580908834963	36	1.45740294183089e-10	HyperLow	chr1	167408638	167409900	Intron2	-	CD247	protein_coding	chr1	167408638	167409197	0.416853094705444	0.442947702060222	CpG: 50	chr1	167408512	167409137	chr1	167408638	167409137	*	*	*	*	*	0	0	chr1-167408525:167409195	chr1	167408525	167409195	chr1	167408638	167409195	chr1-167408762:167408964	chr1	167408762	167408964	chr1
chr1	167416426	167416909	0.445787545787546	0.139120699081997	0.682692307692307	0.161904761904761	0.583876389129274	0.495672316154451	7	0.0411255411255411	HyperHigh	chr1	167410005	167487644	Intron1	-	CD247	protein_coding	chr1	167416426	167416909	1	0.00622110022025013	*	*	*	*	*	0	0	chr1:167416859-167417570	chr1	167416859	167417570	chr1	167416859	167416909	chr1-167416800:167417250	chr1	167416800	167417250	chr1	167416800	167416909	chr1-167416867:167417211	chr1	167416867	167417211	chr1
chr1	167461208	167461839	0.352678571428572	-0.0443776220494225	0.804761904761905	0.373913043478261	0.452092902200277	0.519957589191677	13	0.000137752298745027	HyperHigh	chr1	167410005	167487644	Intron1	-	CD247	protein_coding	chr1	167461208	167461839	1	0.00812735867283195	*	*	*	*	*	0	0	chr1:167461792-167462175	chr1	167461792	167462175	chr1	167461792	167461839	chr1-167461725:167462135	chr1	167461725	167462135	chr1	167461725	167461839	chr1-167461456:167461746	chr1	167461456	167461746	chr1
chr1	167486677	167487294	-0.370833333333333	-0.268625428256891	0.125	0.5	0.174470462995874	0.464049074554845	17	8.48366697329574e-06	HypoLow	chr1	167410005	167487644	Intron1	-	CD247	protein_coding	chr1	167486677	167487294	1	0.00794703692731746	*	*	*	*	*	0	0	chr1:167486210-167486705	chr1	167486210	167486705	chr1	167486677	167486705	chr1-167487165:167487535	chr1	167487165	167487535	chr1	167487165	167487294	chr1-167487228:167487678	chr1	167487228	167487678	chr1
chr1	168106407	168106748	0.324786324786325	0.062907291846956	0.5625	0.222222222222222	0.583333333333333	0.510206331616172	12	0.00765377831187145	HyperHigh	chr1	168106403	168106821	FirstExon	-	GPR161	protein_coding	chr1	168106407	168106748	1	0.815789473684211	*	*	*	*	*	0	0	*	*	*	*	*	0	0	chr1-168104825:168106915	chr1	168104825	168106915	chr1	168106407	168106748	chr1-168106534:168106824	chr1	168106534	168106824	chr1
chr1	168593442	168597034	0.05	-0.306098611351497	0.941176470588235	0.882352941176471	0.167752778258549	0.440726448505556	30	0.00205478750683402	HypoLow	*	*	*	InterGenic	*	*	*	*	*	*	*	*	*	*	*	*	*	0	0	chr1:168594082-168594481	chr1	168594082	168594481	chr1	168594082	168594481	chr1-168596685:168596915	chr1	168596685	168596915	chr1	168596685	168596915	chr1-168596670:168596931	chr1	168596670	168596931	chr1
chr1	168842415	168845328	0.112770897832817	-0.238462338322107	0.975	0.84412955465587	0.162042321394155	0.383648343971437	21	3.44238608667927e-05	HypoLow	*	*	*	InterGenic	*	*	*	*	*	*	*	*	*	*	*	*	*	0	0	*	*	*	*	*	0	0	chr1-168845180:168845330	chr1	168845180	168845330	chr1	168845180	168845328	chr1-168844446:168844686	chr1	168844446	168844686	chr1
chr1	168934707	168941858	0.076555023923445	-0.269061574314459	0.941176470588235	0.85	0.216674140549451	0.496175098299249	38	0.000410052301740247	HypoLow	chr1	168877209	169025421	Intron3	-	LINC00970	antisense	chr1	168934707	168941858	1	0.0482484549159312	*	*	*	*	*	0	0	*	*	*	*	*	0	0	chr1-168941540:168941710	chr1	168941540	168941710	chr1	168941540	168941710	chr1-168941654:168941892	chr1	168941654	168941892	chr1
chr1	169221246	169226486	0.118055555555556	-0.206782546358273	1	0.781746031746032	0.206949200038446	0.314874404751527	19	0.00408858257970889	HypoLow	chr1	169206926	169256540	Intron7	-	NME7	protein_coding	chr1	169221246	169226486	1	0.105615350505906	*	*	*	*	*	0	0	*	*	*	*	*	0	0	*	*	*	*	*	0	0	*	*	*	*	*
chr1	169429391	169429823	0.316742081447964	0.166666666666667	0.6	0.3125	0.5	0.43810682890206	12	0.00853055104658991	HyperHigh	chr1	169429103	169429490	Intron1	-	RP1-206D15.3	lincRNA	chr1	169429391	169429490	0.229166666666667	0.255813953488372	*	*	*	*	*	0	0	*	*	*	*	*	0	0	chr1-169429380:169429935	chr1	169429380	169429935	chr1	169429391	169429490	chr1-169429461:169430105	chr1	169429461	169430105	chr1
chr1	169429391	169429823	0.316742081447964	0.166666666666667	0.6	0.3125	0.5	0.43810682890206	12	0.00853055104658991	HyperHigh	chr1	169429491	169429690	FirstExon	-	RP1-206D15.3	lincRNA	chr1	169429491	169429690	0.460648148148148	1	*	*	*	*	*	0	0	*	*	*	*	*	0	0	chr1-169429380:169429935	chr1	169429380	169429935	chr1	169429491	169429690	chr1-169429687:169429977	chr1	169429687	169429977	chr1
chr1	169429391	169429823	0.316742081447964	0.166666666666667	0.6	0.3125	0.5	0.43810682890206	12	0.00853055104658991	HyperHigh	chr1	169429691	169430691	Promoter	-	RP1-206D15.3	lincRNA	chr1	169429691	169429823	0.305555555555556	0.132	*	*	*	*	*	0	0	*	*	*	*	*	0	0	chr1-169429380:169429935	chr1	169429380	169429935	chr1	169429691	169429823	chr1-169429687:169429977	chr1	169429687	169429977	chr1
chr1	172013548	172014456	-0.25	0.254734835502873	0.666666666666667	0.916666666666667	0.452259883149013	0	8	0.0542155482977505	HypoHigh	chr1	172013525	172013592	Exon9	+	DNM3	protein_coding	chr1	172013548	172013592	0.0484581497797357	0.656716417910448	*	*	*	*	*	0	0	*	*	*	*	*	0	0	*	*	*	*	*	0	0	chr1-172013577:172013947	chr1	172013577	172013947	chr1
chr1	172013548	172014456	-0.25	0.254734835502873	0.666666666666667	0.916666666666667	0.452259883149013	0	8	0.0542155482977505	HypoHigh	chr1	172013593	172017751	Intron9	+	DNM3	protein_coding	chr1	172013593	172014456	0.950440528634361	0.207551707551708	*	*	*	*	*	0	0	*	*	*	*	*	0	0	chr1-172013700:172013850	chr1	172013700	172013850	chr1	172013700	172013850	chr1-172013577:172013947	chr1	172013577	172013947	chr1
chr1	172917114	172928824	0.071428571428571	-0.216674140549451	1	0.888888888888889	0	0.331343403825652	60	8.84328186962222e-06	HypoLow	chr1	172745268	172973421	Intron1	+	RP1-15D23.2	lincRNA	chr1	172917114	172928824	1	0.0513252072074441	*	*	*	*	*	0	0	chr1:172920935-172921277	chr1	172920935	172921277	chr1	172920935	172921277	chr1-172926580:172926870	chr1	172926580	172926870	chr1	172926580	172926870	chr1-172924726:172924942	chr1	172924726	172924942	chr1
chr1	173375725	173376189	0.303571428571429	-0.067068353101534	0.666666666666667	0.333333333333333	0.450548038384464	0.482938545241728	12	0.00160230934336247	HyperHigh	*	*	*	InterGenic	*	*	*	*	*	*	*	*	*	*	*	*	*	0	0	*	*	*	*	*	0	0	chr1-173375965:173376275	chr1	173375965	173376275	chr1	173375965	173376189	chr1-173376056:173376340	chr1	173376056	173376340	chr1
chr1	173638557	173639237	0.232142857142857	0.140642698295787	0.421052631578947	0.117647058823529	0.597493750120193	0.333333333333333	18	0.00676562948182131	HyperHigh	chr1	173628573	173638955	Intron1	-	ANKRD45	protein_coding	chr1	173638557	173638955	0.585294117647059	0.0383355808129455	CpG: 32	chr1	173638662	173639045	chr1	173638662	173638955	*	*	*	*	*	0	0	chr1-173638625:173639130	chr1	173638625	173639130	chr1	173638625	173638955	chr1-173638903:173639808	chr1	173638903	173639808	chr1
chr1	173638557	173639237	0.232142857142857	0.140642698295787	0.421052631578947	0.117647058823529	0.597493750120193	0.333333333333333	18	0.00676562948182131	HyperHigh	chr1	173638956	173639001	FirstExon	-	ANKRD45	protein_coding	chr1	173638956	173639001	0.0661764705882353	1	CpG: 32	chr1	173638662	173639045	chr1	173638956	173639001	*	*	*	*	*	0	0	chr1-173638625:173639130	chr1	173638625	173639130	chr1	173638956	173639001	chr1-173638903:173639808	chr1	173638903	173639808	chr1
chr1	173638557	173639237	0.232142857142857	0.140642698295787	0.421052631578947	0.117647058823529	0.597493750120193	0.333333333333333	18	0.00676562948182131	HyperHigh	chr1	173639002	173640002	Promoter	-	ANKRD45	protein_coding	chr1	173639002	173639237	0.345588235294118	0.235	CpG: 32	chr1	173638662	173639045	chr1	173639002	173639045	*	*	*	*	*	0	0	chr1-173638625:173639130	chr1	173638625	173639130	chr1	173639002	173639130	chr1-173638903:173639808	chr1	173638903	173639808	chr1
chr1	174842495	174847350	0.128571428571429	-0.222854814399865	1	0.846153846153846	0.15633186452976	0.353759374819711	40	9.75611827237697e-08	HypoLow	chr1	174781099	174926593	Intron19	+	RABGAP1L	protein_coding	chr1	174842495	174847350	1	0.0333690736387755	*	*	*	*	*	0	0	*	*	*	*	*	0	0	chr1-174846385:174846730	chr1	174846385	174846730	chr1	174846385	174846730	chr1-174847312:174847708	chr1	174847312	174847708	chr1
chr1	174907709	174908564	0.202380952380952	0.283821063674914	0.610859728506787	0.305555555555555	0.5081324901159	0.228658419422619	9	0.244848687892805	HyperHigh	chr1	174781099	174926593	Intron19	+	RABGAP1L	protein_coding	chr1	174907709	174908564	1	0.0058765309909687	*	*	*	*	*	0	0	chr1:174907888-174908105	chr1	174907888	174908105	chr1	174907888	174908105	chr1-174907800:174908070	chr1	174907800	174908070	chr1	174907800	174908070	chr1-174907824:174908094	chr1	174907824	174908094	chr1
chr1	174907709	174908564	0.202380952380952	0.283821063674914	0.610859728506787	0.305555555555555	0.5081324901159	0.228658419422619	9	0.244848687892805	HyperHigh	chr1	174907662	174914960	Intron3	-	RP1-102G20.5	antisense	chr1	174907709	174908564	1	0.117155385036996	*	*	*	*	*	0	0	chr1:174907888-174908105	chr1	174907888	174908105	chr1	174907888	174908105	chr1-174907800:174908070	chr1	174907800	174908070	chr1	174907800	174908070	chr1-174907824:174908094	chr1	174907824	174908094	chr1
chr1	177139964	177141565	0.208791208791209	-0.077903655780735	0.538461538461538	0.148148148148148	0.45698353148489	0.43810682890206	28	0.00582386496571242	HyperHigh	chr1	177139632	177140632	Promoter	+	BRINP2	protein_coding	chr1	177139964	177140632	0.417239225484072	0.668	CpG: 23	chr1	177140120	177140323	chr1	177140120	177140323	*	*	*	*	*	0	0	chr1-177140405:177140655	chr1	177140405	177140655	chr1	177140405	177140632	chr1-177140149:177141008	chr1	177140149	177141008	chr1
chr1	177139964	177141565	0.208791208791209	-0.077903655780735	0.538461538461538	0.148148148148148	0.45698353148489	0.43810682890206	28	0.00582386496571242	HyperHigh	chr1	177140633	177140868	FirstExon	+	BRINP2	protein_coding	chr1	177140633	177140868	0.146783260462211	1	*	*	*	*	*	0	0	*	*	*	*	*	0	0	chr1-177140685:177141255	chr1	177140685	177141255	chr1	177140685	177140868	chr1-177140149:177141008	chr1	177140149	177141008	chr1
chr1	177139964	177141565	0.208791208791209	-0.077903655780735	0.538461538461538	0.148148148148148	0.45698353148489	0.43810682890206	28	0.00582386496571242	HyperHigh	chr1	177140869	177198936	Intron1	+	BRINP2	protein_coding	chr1	177140869	177141565	0.43472829481574	0.0119861539256376	*	*	*	*	*	0	0	*	*	*	*	*	0	0	chr1-177140685:177141255	chr1	177140685	177141255	chr1	177140869	177141255	chr1-177141315:177141719	chr1	177141315	177141719	chr1
chr1	177989757	178006372	0.074074074074074	-0.224103267486432	1	0.888888888888889	0.15633186452976	0.381703471460528	114	7.58396064888224e-14	HypoLow	chr1	177955065	177991574	Intron1	-	RP4-798P15.3	processed_transcript	chr1	177989757	177991574	0.109359012940114	0.0497685502204936	*	*	*	*	*	0	0	*	*	*	*	*	0	0	chr1-177991400:177991550	chr1	177991400	177991550	chr1	177991400	177991550	chr1-177991171:177991892	chr1	177991171	177991892	chr1
chr1	177989757	178006372	0.074074074074074	-0.224103267486432	1	0.888888888888889	0.15633186452976	0.381703471460528	114	7.58396064888224e-14	HypoLow	chr1	177991575	177991679	FirstExon	-	RP4-798P15.3	processed_transcript	chr1	177991575	177991679	0.00625940415287391	1	*	*	*	*	*	0	0	*	*	*	*	*	0	0	*	*	*	*	*	0	0	chr1-177991171:177991892	chr1	177991171	177991892	chr1
chr1	177989757	178006372	0.074074074074074	-0.224103267486432	1	0.888888888888889	0.15633186452976	0.381703471460528	114	7.58396064888224e-14	HypoLow	chr1	177991680	177992680	Promoter	-	RP4-798P15.3	processed_transcript	chr1	177991680	177992680	0.0601865783930184	1	*	*	*	*	*	0	0	*	*	*	*	*	0	0	chr1-177992520:177992750	chr1	177992520	177992750	chr1	177992520	177992680	chr1-177992563:177992823	chr1	177992563	177992823	chr1
chr1	177989757	178006372	0.074074074074074	-0.224103267486432	1	0.888888888888889	0.15633186452976	0.381703471460528	114	7.58396064888224e-14	HypoLow	chr1	177977285	177991574	Intron9	-	RP11-568K15.1	pseudogene	chr1	177989757	177991574	0.109359012940114	0.127160753026804	*	*	*	*	*	0	0	*	*	*	*	*	0	0	chr1-177991400:177991550	chr1	177991400	177991550	chr1	177991400	177991550	chr1-177991171:177991892	chr1	177991171	177991892	chr1
chr1	177989757	178006372	0.074074074074074	-0.224103267486432	1	0.888888888888889	0.15633186452976	0.381703471460528	114	7.58396064888224e-14	HypoLow	chr1	177991575	177991803	Exon9	-	RP11-568K15.1	pseudogene	chr1	177991575	177991803	0.0137225398736082	1	*	*	*	*	*	0	0	*	*	*	*	*	0	0	*	*	*	*	*	0	0	chr1-177991171:177991892	chr1	177991171	177991892	chr1
chr1	177989757	178006372	0.074074074074074	-0.224103267486432	1	0.888888888888889	0.15633186452976	0.381703471460528	114	7.58396064888224e-14	HypoLow	chr1	177991804	177993538	Intron8	-	RP11-568K15.1	pseudogene	chr1	177991804	177993538	0.104363526933494	1	*	*	*	*	*	0	0	*	*	*	*	*	0	0	chr1-177992520:177992750	chr1	177992520	177992750	chr1	177992520	177992750	chr1-177992563:177992823	chr1	177992563	177992823	chr1
chr1	177989757	178006372	0.074074074074074	-0.224103267486432	1	0.888888888888889	0.15633186452976	0.381703471460528	114	7.58396064888224e-14	HypoLow	chr1	177993539	177993621	Exon8	-	RP11-568K15.1	pseudogene	chr1	177993539	177993621	0.00493529942822751	1	*	*	*	*	*	0	0	*	*	*	*	*	0	0	*	*	*	*	*	0	0	chr1-177993596:177994036	chr1	177993596	177994036	chr1
chr1	177989757	178006372	0.074074074074074	-0.224103267486432	1	0.888888888888889	0.15633186452976	0.381703471460528	114	7.58396064888224e-14	HypoLow	chr1	177993622	177995289	Intron7	-	RP11-568K15.1	pseudogene	chr1	177993622	177995289	0.100331026181162	1	*	*	*	*	*	0	0	*	*	*	*	*	0	0	chr1-177994765:177995050	chr1	177994765	177995050	chr1	177994765	177995050	chr1-177994684:177994979	chr1	177994684	177994979	chr1
chr1	177989757	178006372	0.074074074074074	-0.224103267486432	1	0.888888888888889	0.15633186452976	0.381703471460528	114	7.58396064888224e-14	HypoLow	chr1	177995290	177995390	Exon7	-	RP11-568K15.1	pseudogene	chr1	177995290	177995390	0.00601865783930184	1	*	*	*	*	*	0	0	*	*	*	*	*	0	0	*	*	*	*	*	0	0	*	*	*	*	*
chr1	177989757	178006372	0.074074074074074	-0.224103267486432	1	0.888888888888889	0.15633186452976	0.381703471460528	114	7.58396064888224e-14	HypoLow	chr1	177995391	178000685	Intron6	-	RP11-568K15.1	pseudogene	chr1	177995391	178000685	0.318627746012639	1	*	*	*	*	*	0	0	*	*	*	*	*	0	0	chr1-177999965:178000115	chr1	177999965	178000115	chr1	177999965	178000115	chr1-178000672:178000962	chr1	178000672	178000962	chr1
chr1	177989757	178006372	0.074074074074074	-0.224103267486432	1	0.888888888888889	0.15633186452976	0.381703471460528	114	7.58396064888224e-14	HypoLow	chr1	178000686	178000795	Exon6	-	RP11-568K15.1	pseudogene	chr1	178000686	178000795	0.006560337044839	1	*	*	*	*	*	0	0	*	*	*	*	*	0	0	chr1-178000780:178000930	chr1	178000780	178000930	chr1	178000780	178000795	chr1-178000740:178000980	chr1	178000740	178000980	chr1
chr1	177989757	178006372	0.074074074074074	-0.224103267486432	1	0.888888888888889	0.15633186452976	0.381703471460528	114	7.58396064888224e-14	HypoLow	chr1	178000796	178001564	Intron5	-	RP11-568K15.1	pseudogene	chr1	178000796	178001564	0.0462232922058381	1	*	*	*	*	*	0	0	*	*	*	*	*	0	0	chr1-178001560:178001795	chr1	178001560	178001795	chr1	178001560	178001564	chr1-178001070:178001231	chr1	178001070	178001231	chr1
chr1	177989757	178006372	0.074074074074074	-0.224103267486432	1	0.888888888888889	0.15633186452976	0.381703471460528	114	7.58396064888224e-14	HypoLow	chr1	178001565	178001630	Exon5	-	RP11-568K15.1	pseudogene	chr1	178001565	178001630	0.00391212759554619	1	*	*	*	*	*	0	0	*	*	*	*	*	0	0	chr1-178001560:178001795	chr1	178001560	178001795	chr1	178001565	178001630	chr1-178000936:178001581	chr1	178000936	178001581	chr1
chr1	177989757	178006372	0.074074074074074	-0.224103267486432	1	0.888888888888889	0.15633186452976	0.381703471460528	114	7.58396064888224e-14	HypoLow	chr1	178001631	178002161	Intron4	-	RP11-568K15.1	pseudogene	chr1	178001631	178002161	0.0318988865482997	1	*	*	*	*	*	0	0	*	*	*	*	*	0	0	chr1-178001560:178001795	chr1	178001560	178001795	chr1	178001631	178001795	chr1-178000550:178001753	chr1	178000550	178001753	chr1
chr1	177989757	178006372	0.074074074074074	-0.224103267486432	1	0.888888888888889	0.15633186452976	0.381703471460528	114	7.58396064888224e-14	HypoLow	chr1	178002162	178002220	Exon4	-	RP11-568K15.1	pseudogene	chr1	178002162	178002220	0.00349082154679506	1	*	*	*	*	*	0	0	*	*	*	*	*	0	0	chr1-178002200:178002470	chr1	178002200	178002470	chr1	178002200	178002220	*	*	*	*	*
chr1	177989757	178006372	0.074074074074074	-0.224103267486432	1	0.888888888888889	0.15633186452976	0.381703471460528	114	7.58396064888224e-14	HypoLow	chr1	178002221	178003839	Intron3	-	RP11-568K15.1	pseudogene	chr1	178002221	178003839	0.0973818838399037	1	*	*	*	*	*	0	0	*	*	*	*	*	0	0	chr1-178003805:178004215	chr1	178003805	178004215	chr1	178003805	178003839	chr1-178003835:178004179	chr1	178003835	178004179	chr1
chr1	177989757	178006372	0.074074074074074	-0.224103267486432	1	0.888888888888889	0.15633186452976	0.381703471460528	114	7.58396064888224e-14	HypoLow	chr1	178003840	178003936	Exon3	-	RP11-568K15.1	pseudogene	chr1	178003840	178003936	0.00577791152572976	1	*	*	*	*	*	0	0	*	*	*	*	*	0	0	chr1-178003805:178004215	chr1	178003805	178004215	chr1	178003840	178003936	chr1-178003873:178004383	chr1	178003873	178004383	chr1
chr1	177989757	178006372	0.074074074074074	-0.224103267486432	1	0.888888888888889	0.15633186452976	0.381703471460528	114	7.58396064888224e-14	HypoLow	chr1	178003937	178006828	Intron2	-	RP11-568K15.1	pseudogene	chr1	178003937	178006372	0.146554318387	0.842269111034244	*	*	*	*	*	0	0	*	*	*	*	*	0	0	chr1-178006125:178006275	chr1	178006125	178006275	chr1	178006125	178006275	chr1-178006349:178006779	chr1	178006349	178006779	chr1
chr1	178230199	178244014	0.0909090909090911	-0.228012811879681	1	0.875	0.197224259527442	0.452259883149013	76	6.46517532638725e-10	HypoLow	chr1	178063830	178252698	Intron1	+	RASAL2	protein_coding	chr1	178230199	178244014	1	0.0731463244170532	*	*	*	*	*	0	0	chr1:178235815-178236162	chr1	178235815	178236162	chr1	178235815	178236162	chr1-178243260:178243470	chr1	178243260	178243470	chr1	178243260	178243470	chr1-178243015:178243096	chr1	178243015	178243096	chr1
chr1	179355461	179361176	0.08	-0.257742782841639	1	0.888888888888889	0	0.41355684389223	38	1.92139834313122e-05	HypoLow	chr1	179354495	179363037	Intron9	+	AXDND1	protein_coding	chr1	179355461	179361176	1	0.669047061578085	*	*	*	*	*	0	0	*	*	*	*	*	0	0	chr1-179355425:179355695	chr1	179355425	179355695	chr1	179355461	179355695	chr1-179360712:179361132	chr1	179360712	179361132	chr1
chr1	179544764	179545457	0.255263157894737	-0.029046976160975	0.65686274509804	0.230263157894737	0.60974902466714	0.56790056535245	23	0.000607571638549818	HyperHigh	chr1	179544726	179545087	FirstExon	-	NPHS2	protein_coding	chr1	179544764	179545087	0.466089466089466	0.894736842105263	CpG: 66	chr1	179544720	179545307	chr1	179544764	179545087	*	*	*	*	*	0	0	chr1-179544580:179545455	chr1	179544580	179545455	chr1	179544764	179545087	chr1-179544777:179545033	chr1	179544777	179545033	chr1
chr1	179544764	179545457	0.255263157894737	-0.029046976160975	0.65686274509804	0.230263157894737	0.60974902466714	0.56790056535245	23	0.000607571638549818	HyperHigh	chr1	179545088	179546088	Promoter	-	NPHS2	protein_coding	chr1	179545088	179545457	0.532467532467532	0.369	CpG: 66	chr1	179544720	179545307	chr1	179545088	179545307	*	*	*	*	*	0	0	chr1-179544580:179545455	chr1	179544580	179545455	chr1	179545088	179545455	chr1-179544766:179545891	chr1	179544766	179545891	chr1
chr1	179711711	179713787	0.32481684981685	0.172743646504643	0.577380952380952	0.195238095238095	0.593166747208716	0.449326967546474	65	6.26368917917313e-11	HyperHigh	chr1	179711490	179711832	LastExon	+	RP11-12M5.1	lincRNA	chr1	179711711	179711832	0.0582851637764933	0.353801169590643	*	*	*	*	*	0	0	*	*	*	*	*	0	0	chr1-179711725:179713695	chr1	179711725	179713695	chr1	179711725	179711832	chr1-179711829:179712423	chr1	179711829	179712423	chr1
chr1	179711711	179713787	0.32481684981685	0.172743646504643	0.577380952380952	0.195238095238095	0.593166747208716	0.449326967546474	65	6.26368917917313e-11	HyperHigh	chr1	179711297	179712297	Promoter	+	FAM163A	protein_coding	chr1	179711711	179712297	0.282273603082852	0.586	CpG: 199	chr1	179711947	179713951	chr1	179711947	179712297	*	*	*	*	*	0	0	chr1-179711725:179713695	chr1	179711725	179713695	chr1	179711725	179712297	chr1-179712273:179712657	chr1	179712273	179712657	chr1
chr1	179711711	179713787	0.32481684981685	0.172743646504643	0.577380952380952	0.195238095238095	0.593166747208716	0.449326967546474	65	6.26368917917313e-11	HyperHigh	chr1	179712298	179712558	FirstExon	+	FAM163A	protein_coding	chr1	179712298	179712558	0.1252408477842	1	CpG: 199	chr1	179711947	179713951	chr1	179712298	179712558	*	*	*	*	*	0	0	chr1-179711725:179713695	chr1	179711725	179713695	chr1	179712298	179712558	chr1-179712273:179712657	chr1	179712273	179712657	chr1
chr1	179711711	179713787	0.32481684981685	0.172743646504643	0.577380952380952	0.195238095238095	0.593166747208716	0.449326967546474	65	6.26368917917313e-11	HyperHigh	chr1	179712559	179776932	Intron1	+	FAM163A	protein_coding	chr1	179712559	179713787	0.591522157996146	0.0190763208177341	CpG: 199	chr1	179711947	179713951	chr1	179712559	179713787	*	*	*	*	*	0	0	chr1-179711725:179713695	chr1	179711725	179713695	chr1	179712559	179713695	chr1-179713744:179714234	chr1	179713744	179714234	chr1
chr1	179713819	179716170	0.105042016806723	-0.201210753610957	0.923076923076923	0.8125	0.306098611351497	0.364971439470699	28	0.0373387040621899	HypoLow	chr1	179712559	179776932	Intron1	+	FAM163A	protein_coding	chr1	179713819	179716170	1	0.0365215229987728	CpG: 199	chr1	179711947	179713951	chr1	179713819	179713951	*	*	*	*	*	0	0	chr1-179716045:179716195	chr1	179716045	179716195	chr1	179716045	179716170	chr1-179714486:179714710	chr1	179714486	179714710	chr1
chr1	180198076	180198456	0.266233766233766	0.023781713243412	0.615384615384615	0.263157894736842	0.615479781557005	0.523650198151556	18	0.00257012389031993	HyperHigh	chr1	180198420	180199420	Promoter	+	LHX4	protein_coding	chr1	180198420	180198456	0.0947368421052632	0.036	CpG: 459	chr1	180198119	180204975	chr1	180198420	180198456	*	*	*	*	*	0	0	chr1-180197725:180198535	chr1	180197725	180198535	chr1	180198420	180198456	chr1-180198435:180199051	chr1	180198435	180199051	chr1
chr1	180533773	180539193	0.052631578947368	-0.232254428691944	1	0.904761904761905	0.137938950101211	0.346306865010531	44	9.14157334944628e-05	HypoLow	chr1	180531481	180534386	Intron2	+	RP11-522D2.1	lincRNA	chr1	180533773	180534386	0.11309963099631	0.211015490533563	*	*	*	*	*	0	0	*	*	*	*	*	0	0	*	*	*	*	*	0	0	chr1-180534129:180534505	chr1	180534129	180534505	chr1
chr1	180533773	180539193	0.052631578947368	-0.232254428691944	1	0.904761904761905	0.137938950101211	0.346306865010531	44	9.14157334944628e-05	HypoLow	chr1	180534387	180535654	LastExon	+	RP11-522D2.1	lincRNA	chr1	180534387	180535654	0.233763837638376	1	*	*	*	*	*	0	0	*	*	*	*	*	0	0	chr1-180535300:180535510	chr1	180535300	180535510	chr1	180535300	180535510	chr1-180535155:180535595	chr1	180535155	180535595	chr1
chr1	181286776	181287758	0.0909090909090909	0.200535581913157	0.166666666666667	0.0625	0.459594497828725	0.288618872485741	30	0.0393919239397285	HypoHigh	*	*	*	InterGenic	*	*	*	*	*	*	*	*	CpG: 52	chr1	181287300	181287873	chr1	181287300	181287758	*	*	*	*	*	0	0	chr1-181287085:181288075	chr1	181287085	181288075	chr1	181287085	181287758	chr1-181287543:181287783	chr1	181287543	181287783	chr1
chr1	181451124	181452672	0.219251336898396	0.153211336435247	0.555555555555556	0.15	0.63208020839343	0.486382639009082	36	0.000234056121871148	HyperHigh	chr1	181451715	181452715	Promoter	+	CACNA1E	protein_coding	chr1	181451715	181452672	0.618217054263566	0.957	CpG: 64	chr1	181451311	181452049	chr1	181451715	181452049	chr1:181451162-181451821	chr1	181451162	181451821	chr1	181451715	181451821	chr1-181452285:181452595	chr1	181452285	181452595	chr1	181452285	181452595	chr1-181452612:181453142	chr1	181452612	181453142	chr1
chr1	182025815	182026536	0.233835431405764	0.04780226114452	0.690789473684211	0.212406015037594	0.598004508596415	0.505792889234205	27	0.000578958549386687	HyperHigh	chr1	182023705	182027208	LastExon	-	ZNF648	protein_coding	chr1	182025815	182026536	1	0.205823579788752	CpG: 91	chr1	182025604	182026511	chr1	182025815	182026511	*	*	*	*	*	0	0	chr1-182025545:182026555	chr1	182025545	182026555	chr1	182025815	182026536	chr1-182025846:182026162	chr1	182025846	182026162	chr1
chr1	182409518	182414124	0.105263157894737	-0.250543055795941	0.941176470588235	0.875	0.206460731559588	0.486382639009082	44	2.5261036232426e-05	HypoLow	*	*	*	InterGenic	*	*	*	*	*	*	*	*	*	*	*	*	*	0	0	*	*	*	*	*	0	0	chr1-182413565:182413975	chr1	182413565	182413975	chr1	182413565	182413975	chr1-182413656:182413880	chr1	182413656	182413880	chr1
chr1	182653529	182654077	0.266666666666667	0.00808273111027502	0.461538461538462	0.2	0.43056399904602	0.436432222745668	14	0.027233820961507	HyperHigh	*	*	*	InterGenic	*	*	*	*	*	*	*	*	*	*	*	*	*	0	0	*	*	*	*	*	0	0	chr1-182653965:182654115	chr1	182653965	182654115	chr1	182653965	182654077	chr1-182654054:182654758	chr1	182654054	182654758	chr1
chr1	182921685	182922339	0.268155757286192	-0.0503924704005	0.713636363636363	0.422619047619048	0.62863511722642	0.624331404674447	23	0.00646136779174342	HyperHigh	chr1	182920599	182921863	Intron1	-	SHCBP1L	protein_coding	chr1	182921685	182921863	0.27217125382263	0.140822784810127	CpG: 79	chr1	182921819	182922644	chr1	182921819	182921863	*	*	*	*	*	0	0	chr1-182921740:182921890	chr1	182921740	182921890	chr1	182921740	182921863	*	*	*	*	*
chr1	182921685	182922339	0.268155757286192	-0.0503924704005	0.713636363636363	0.422619047619048	0.62863511722642	0.624331404674447	23	0.00646136779174342	HyperHigh	chr1	182921864	182922660	FirstExon	-	SHCBP1L	protein_coding	chr1	182921864	182922339	0.726299694189602	0.596733668341708	CpG: 79	chr1	182921819	182922644	chr1	182921864	182922339	*	*	*	*	*	0	0	chr1-182921985:182922495	chr1	182921985	182922495	chr1	182921985	182922339	chr1-182922203:182922432	chr1	182922203	182922432	chr1
chr1	183024183	183028976	0.095238095238095	-0.23216371506744	1	0.882352941176471	0.228012811879681	0.452259883149013	40	0.000410494589522982	HypoLow	chr1	182993270	183072462	Intron1	+	LAMC1	protein_coding	chr1	183024183	183028976	1	0.0605237902818467	*	*	*	*	*	0	0	*	*	*	*	*	0	0	chr1-183028060:183028355	chr1	183028060	183028355	chr1	183028060	183028355	chr1-183028185:183028644	chr1	183028185	183028644	chr1
chr1	183154980	183155630	0.210714285714286	0.12378465733905	0.555555555555556	0.226190476190476	0.637927859519488	0.48241988463363	21	0.00289979769982911	HyperHigh	chr1	183154422	183155422	Promoter	+	LAMC2	protein_coding	chr1	183154980	183155422	0.68	0.442	*	*	*	*	*	0	0	*	*	*	*	*	0	0	chr1-183155065:183155575	chr1	183155065	183155575	chr1	183155065	183155422	chr1-183155323:183155703	chr1	183155323	183155703	chr1
chr1	183154980	183155630	0.210714285714286	0.12378465733905	0.555555555555556	0.226190476190476	0.637927859519488	0.48241988463363	21	0.00289979769982911	HyperHigh	chr1	183155423	183155566	FirstExon	+	LAMC2	protein_coding	chr1	183155423	183155566	0.22	1	*	*	*	*	*	0	0	*	*	*	*	*	0	0	chr1-183155065:183155575	chr1	183155065	183155575	chr1	183155423	183155566	chr1-183155323:183155703	chr1	183155323	183155703	chr1
chr1	183154980	183155630	0.210714285714286	0.12378465733905	0.555555555555556	0.226190476190476	0.637927859519488	0.48241988463363	21	0.00289979769982911	HyperHigh	chr1	183155567	183177015	Intron1	+	LAMC2	protein_coding	chr1	183155567	183155630	0.0969230769230769	0.00293733681462141	*	*	*	*	*	0	0	*	*	*	*	*	0	0	chr1-183155585:183155775	chr1	183155585	183155775	chr1	183155585	183155630	chr1-183155323:183155703	chr1	183155323	183155703	chr1
chr1	183871570	183884948	0.0625	-0.216674140549451	1	0.869565217391304	0.216674140549451	0.412213580647056	76	2.83423444747261e-05	HypoLow	chr1	183869371	183871701	Intron12	+	RGL1	protein_coding	chr1	183871570	183871701	0.00979219614292121	0.0562231759656652	*	*	*	*	*	0	0	*	*	*	*	*	0	0	*	*	*	*	*	0	0	chr1-183871226:183871630	chr1	183871226	183871630	chr1
chr1	183871570	183884948	0.0625	-0.216674140549451	1	0.869565217391304	0.216674140549451	0.412213580647056	76	2.83423444747261e-05	HypoLow	chr1	183871702	183871734	Exon13	+	RGL1	protein_coding	chr1	183871702	183871734	0.00239198684407236	1	*	*	*	*	*	0	0	*	*	*	*	*	0	0	*	*	*	*	*	0	0	chr1-183871048:183871839	chr1	183871048	183871839	chr1
chr1	183871570	183884948	0.0625	-0.216674140549451	1	0.869565217391304	0.216674140549451	0.412213580647056	76	2.83423444747261e-05	HypoLow	chr1	183871735	183873983	Intron13	+	RGL1	protein_coding	chr1	183871735	183873983	0.168037075796083	1	*	*	*	*	*	0	0	*	*	*	*	*	0	0	chr1-183873340:183873490	chr1	183873340	183873490	chr1	183873340	183873490	chr1-183873176:183873556	chr1	183873176	183873556	chr1
chr1	183871570	183884948	0.0625	-0.216674140549451	1	0.869565217391304	0.216674140549451	0.412213580647056	76	2.83423444747261e-05	HypoLow	chr1	183873984	183874105	Exon14	+	RGL1	protein_coding	chr1	183873984	183874105	0.0090447002541486	1	*	*	*	*	*	0	0	*	*	*	*	*	0	0	*	*	*	*	*	0	0	*	*	*	*	*
chr1	183871570	183884948	0.0625	-0.216674140549451	1	0.869565217391304	0.216674140549451	0.412213580647056	76	2.83423444747261e-05	HypoLow	chr1	183874106	183876145	Intron14	+	RGL1	protein_coding	chr1	183874106	183876145	0.152414411720736	1	*	*	*	*	*	0	0	*	*	*	*	*	0	0	*	*	*	*	*	0	0	chr1-183874286:183874662	chr1	183874286	183874662	chr1
chr1	183871570	183884948	0.0625	-0.216674140549451	1	0.869565217391304	0.216674140549451	0.412213580647056	76	2.83423444747261e-05	HypoLow	chr1	183876146	183876235	Exon15	+	RGL1	protein_coding	chr1	183876146	183876235	0.00665271341007624	1	*	*	*	*	*	0	0	*	*	*	*	*	0	0	*	*	*	*	*	0	0	*	*	*	*	*
chr1	183871570	183884948	0.0625	-0.216674140549451	1	0.869565217391304	0.216674140549451	0.412213580647056	76	2.83423444747261e-05	HypoLow	chr1	183876236	183881215	Intron15	+	RGL1	protein_coding	chr1	183876236	183881215	0.372178203019883	1	*	*	*	*	*	0	0	chr1:183880519-183880826	chr1	183880519	183880826	chr1	183880519	183880826	chr1-183880505:183880790	chr1	183880505	183880790	chr1	183880505	183880790	chr1-183881198:183881678	chr1	183881198	183881678	chr1
chr1	183871570	183884948	0.0625	-0.216674140549451	1	0.869565217391304	0.216674140549451	0.412213580647056	76	2.83423444747261e-05	HypoLow	chr1	183881216	183881402	Exon16	+	RGL1	protein_coding	chr1	183881216	183881402	0.0139034235311706	1	*	*	*	*	*	0	0	*	*	*	*	*	0	0	chr1-183881245:183881395	chr1	183881245	183881395	chr1	183881245	183881395	chr1-183881382:183881732	chr1	183881382	183881732	chr1
chr1	183871570	183884948	0.0625	-0.216674140549451	1	0.869565217391304	0.216674140549451	0.412213580647056	76	2.83423444747261e-05	HypoLow	chr1	183881403	183885580	Intron16	+	RGL1	protein_coding	chr1	183881403	183884948	0.264987292569891	0.848695235815178	*	*	*	*	*	0	0	*	*	*	*	*	0	0	chr1-183884720:183885055	chr1	183884720	183885055	chr1	183884720	183884948	chr1-183884898:183885482	chr1	183884898	183885482	chr1
chr1	184007072	184007758	0.142857142857143	-0.328808909576947	1	0.777777777777778	0.146498995640504	0.510164352252494	14	0.0127699542927365	HypoLow	chr1	184006864	184007864	Promoter	-	COLGALT2	protein_coding	chr1	184007072	184007758	1	0.686	*	*	*	*	*	0	0	*	*	*	*	*	0	0	chr1-184005565:184007115	chr1	184005565	184007115	chr1	184007072	184007115	chr1-184007355:184007735	chr1	184007355	184007735	chr1
chr1	184633111	184633395	0.305059523809524	0.22933982814368	0.3875	0.0370879120879121	0.61517495390999	0.359866145244612	11	0.00246886309828463	HyperHigh	*	*	*	InterGenic	*	*	*	*	*	*	*	*	CpG: 36	chr1	184633223	184633663	chr1	184633223	184633395	*	*	*	*	*	0	0	chr1-184633080:184633375	chr1	184633080	184633375	chr1	184633111	184633375	chr1-184633268:184633544	chr1	184633268	184633544	chr1
chr1	186605301	186607113	0.085561497326203	-0.315457645328481	1	0.882352941176471	0	0.402506249879807	24	0.000254931004381341	HypoLow	*	*	*	InterGenic	*	*	*	*	*	*	*	*	*	*	*	*	*	0	0	*	*	*	*	*	0	0	chr1-186606205:186606355	chr1	186606205	186606355	chr1	186606205	186606355	chr1-186606693:186607083	chr1	186606693	186607083	chr1
chr1	187780204	187794158	0.0851449275362315	-0.234119828264312	0.919871794871795	0.791304347826087	0.282094837281638	0.484294097442576	51	0.0066129401030371	HypoLow	*	*	*	InterGenic	*	*	*	*	*	*	*	*	*	*	*	*	*	0	0	*	*	*	*	*	0	0	chr1-187788320:187788510	chr1	187788320	187788510	chr1	187788320	187788510	chr1-187786906:187787356	chr1	187786906	187787356	chr1
chr1	188207723	188219230	0.066666666666667	-0.30805811743348	1	0.904545454545455	0	0.402506249879807	29	0.00863512205228069	HypoLow	*	*	*	InterGenic	*	*	*	*	*	*	*	*	*	*	*	*	*	0	0	*	*	*	*	*	0	0	chr1-188219040:188219230	chr1	188219040	188219230	chr1	188219040	188219230	chr1-188219087:188219155	chr1	188219087	188219155	chr1
chr1	188232421	188258928	0.106477732793523	-0.246033383563357	0.904545454545455	0.8	0.270426041486378	0.490993329756741	101	4.29883018766496e-07	HypoLow	*	*	*	InterGenic	*	*	*	*	*	*	*	*	*	*	*	*	*	0	0	*	*	*	*	*	0	0	chr1-188256940:188257090	chr1	188256940	188257090	chr1	188256940	188257090	chr1-188257254:188257794	chr1	188257254	188257794	chr1
chr1	188510847	188513397	0.127005347593583	-0.317527271924427	0.958333333333333	0.83974358974359	0.240642698295787	0.566459049230059	17	0.0172237191423141	HypoLow	*	*	*	InterGenic	*	*	*	*	*	*	*	*	*	*	*	*	*	0	0	*	*	*	*	*	0	0	*	*	*	*	*	0	0	chr1-188513127:188513277	chr1	188513127	188513277	chr1
chr1	188818575	188823514	0.115089514066496	-0.270460941216717	0.857142857142857	0.7	0.365265085000311	0.63066516234634	22	0.0293993024890633	HypoLow	*	*	*	InterGenic	*	*	*	*	*	*	*	*	*	*	*	*	*	0	0	*	*	*	*	*	0	0	chr1-188820545:188820835	chr1	188820545	188820835	chr1	188820545	188820835	chr1-188820482:188820766	chr1	188820482	188820766	chr1
chr1	188866531	188884755	0.0745098039215679	-0.217474135732638	0.909090909090909	0.851851851851852	0.307309364962454	0.495158432409111	86	0.000965452332698044	HypoLow	chr1	188873818	188874818	Promoter	+	LINC01035	lincRNA	chr1	188873818	188874818	0.0548726953467954	1	*	*	*	*	*	0	0	*	*	*	*	*	0	0	*	*	*	*	*	0	0	*	*	*	*	*
chr1	188866531	188884755	0.0745098039215679	-0.217474135732638	0.909090909090909	0.851851851851852	0.307309364962454	0.495158432409111	86	0.000965452332698044	HypoLow	chr1	188874819	188875057	FirstExon	+	LINC01035	lincRNA	chr1	188874819	188875057	0.0130597014925373	1	*	*	*	*	*	0	0	*	*	*	*	*	0	0	*	*	*	*	*	0	0	*	*	*	*	*
chr1	188866531	188884755	0.0745098039215679	-0.217474135732638	0.909090909090909	0.851851851851852	0.307309364962454	0.495158432409111	86	0.000965452332698044	HypoLow	chr1	188875058	189005848	Intron1	+	LINC01035	lincRNA	chr1	188875058	188884755	0.532100526777875	0.0741417539567245	*	*	*	*	*	0	0	*	*	*	*	*	0	0	*	*	*	*	*	0	0	chr1-188883742:188884242	chr1	188883742	188884242	chr1
chr1	189608865	189613837	0.082706766917293	-0.245739940713295	0.909090909090909	0.842105263157895	0.240642698295787	0.459594497828725	22	0.0943055309066683	HypoLow	*	*	*	InterGenic	*	*	*	*	*	*	*	*	*	*	*	*	*	0	0	*	*	*	*	*	0	0	chr1-189610980:189611190	chr1	189610980	189611190	chr1	189610980	189611190	chr1-189610973:189611217	chr1	189610973	189611217	chr1
chr1	190332616	190344643	0.0606617647058825	-0.243125547879861	0.961538461538461	0.833333333333333	0.270426041486378	0.496846001985768	51	0.000851113167042147	HypoLow	chr1	190250881	190423784	Intron2	-	BRINP3	protein_coding	chr1	190332616	190344643	1	0.0695592326333262	*	*	*	*	*	0	0	*	*	*	*	*	0	0	chr1-190342920:190343170	chr1	190342920	190343170	chr1	190342920	190343170	chr1-190342893:190343163	chr1	190342893	190343163	chr1
chr1	190375767	190398903	0.1	-0.201667334304654	0.947368421052632	0.823529411764706	0.24484330714649	0.450676700585984	102	8.42028020048306e-08	HypoLow	chr1	190250881	190423784	Intron2	-	BRINP3	protein_coding	chr1	190375767	190398903	1	0.13380912997461	*	*	*	*	*	0	0	*	*	*	*	*	0	0	chr1-190398360:190398510	chr1	190398360	190398510	chr1	190398360	190398510	chr1-190397545:190397801	chr1	190397545	190397801	chr1
chr1	190828045	190830721	0.343362193362194	-0.0561130189793145	0.8	0.44949494949495	0.472988568418904	0.52718762930911	11	0.0209886837297748	HyperHigh	*	*	*	InterGenic	*	*	*	*	*	*	*	*	*	*	*	*	*	0	0	*	*	*	*	*	0	0	*	*	*	*	*	0	0	chr1-190829306:190829716	chr1	190829306	190829716	chr1
chr1	192778594	192779094	0.208064516129032	-0.366623762141977	0.95	0.761904761904762	0.146498995640504	0.519242592913106	12	0.00218529904598545	HyperLow	chr1	192778312	192779295	Intron1	+	RGS2	protein_coding	chr1	192778594	192779094	1	0.508646998982706	*	*	*	*	*	0	0	*	*	*	*	*	0	0	chr1-192778785:192778935	chr1	192778785	192778935	chr1	192778785	192778935	chr1-192778502:192779452	chr1	192778502	192779452	chr1
chr1	193348582	193365009	0.083333333333333	-0.24484330714649	1	0.888888888888889	0.15633186452976	0.402506249879807	78	1.43087424225781e-09	HypoLow	*	*	*	InterGenic	*	*	*	*	*	*	*	*	*	*	*	*	*	0	0	chr1:193357937-193358136	chr1	193357937	193358136	chr1	193357937	193358136	chr1-193364585:193364895	chr1	193364585	193364895	chr1	193364585	193364895	chr1-193364737:193365157	chr1	193364737	193365157	chr1
chr1	193506442	193536958	0.0571895424836605	-0.20444652130023	1	0.894736842105263	0.15633186452976	0.33925885353093	191	3.19491631198928e-16	HypoLow	*	*	*	InterGenic	*	*	*	*	*	*	*	*	*	*	*	*	*	0	0	chr1:193536100-193536513	chr1	193536100	193536513	chr1	193536100	193536513	chr1-193535705:193535855	chr1	193535705	193535855	chr1	193535705	193535855	chr1-193535333:193535692	chr1	193535333	193535692	chr1
chr1	193918193	193958516	0.0625	-0.216674140549451	1	0.9	0.137938950101211	0.353759374819711	158	6.14162140664559e-11	HypoLow	*	*	*	InterGenic	*	*	*	*	*	*	*	*	*	*	*	*	*	0	0	*	*	*	*	*	0	0	chr1-193954485:193954635	chr1	193954485	193954635	chr1	193954485	193954635	chr1-193957981:193958401	chr1	193957981	193958401	chr1
chr1	193968248	193997905	0.0734953703703705	-0.202167348265258	1	0.888888888888889	0	0.328808909576947	191	8.68406469563729e-19	HypoLow	*	*	*	InterGenic	*	*	*	*	*	*	*	*	*	*	*	*	*	0	0	*	*	*	*	*	0	0	chr1-193997220:193997450	chr1	193997220	193997450	chr1	193997220	193997450	chr1-193997196:193997438	chr1	193997196	193997438	chr1
chr1	194725850	194745854	0.0625	-0.249030337208715	1	0.888888888888889	0.197224259527442	0.441670403608059	102	5.92465205848439e-07	HypoLow	*	*	*	InterGenic	*	*	*	*	*	*	*	*	*	*	*	*	*	0	0	*	*	*	*	*	0	0	chr1-194743740:194743890	chr1	194743740	194743890	chr1	194743740	194743890	chr1-194744287:194744737	chr1	194744287	194744737	chr1
chr1	194797826	194814746	0.1	-0.215420548537987	0.944444444444444	0.833333333333333	0.257911941907031	0.471266521535227	77	4.0558013869058e-08	HypoLow	*	*	*	InterGenic	*	*	*	*	*	*	*	*	*	*	*	*	*	0	0	*	*	*	*	*	0	0	chr1-194799600:194799770	chr1	194799600	194799770	chr1	194799600	194799770	chr1-194812857:194813257	chr1	194812857	194813257	chr1
chr1	195732761	195736909	0.12985347985348	-0.222663293473189	0.940972222222222	0.827380952380952	0.206949200038446	0.446263072363596	23	0.000116206103268965	HypoLow	*	*	*	InterGenic	*	*	*	*	*	*	*	*	*	*	*	*	*	0	0	*	*	*	*	*	0	0	chr1-195735880:195736110	chr1	195735880	195736110	chr1	195735880	195736110	chr1-195735983:195736077	chr1	195735983	195736077	chr1
chr1	196577247	196578551	0.339583333333334	0.125740958535478	0.473389355742297	0.138095238095238	0.62894739604367	0.45953372436775	35	3.87258619148859e-09	HyperHigh	chr1	196461472	196577344	Intron1	-	KCNT2	protein_coding	chr1	196577247	196577344	0.0743865030674847	0.000837130626898647	*	*	*	*	*	0	0	*	*	*	*	*	0	0	chr1-196577125:196577435	chr1	196577125	196577435	chr1	196577247	196577344	chr1-196577291:196577761	chr1	196577291	196577761	chr1
chr1	196577247	196578551	0.339583333333334	0.125740958535478	0.473389355742297	0.138095238095238	0.62894739604367	0.45953372436775	35	3.87258619148859e-09	HyperHigh	chr1	196577345	196577541	FirstExon	-	KCNT2	protein_coding	chr1	196577345	196577541	0.150306748466258	1	*	*	*	*	*	0	0	*	*	*	*	*	0	0	chr1-196577540:196578250	chr1	196577540	196578250	chr1	196577540	196577541	chr1-196577474:196578321	chr1	196577474	196578321	chr1
chr1	196577247	196578551	0.339583333333334	0.125740958535478	0.473389355742297	0.138095238095238	0.62894739604367	0.45953372436775	35	3.87258619148859e-09	HyperHigh	chr1	196577542	196578542	Promoter	-	KCNT2	protein_coding	chr1	196577542	196578542	0.766871165644172	1	CpG: 24	chr1	196577708	196578011	chr1	196577708	196578011	*	*	*	*	*	0	0	chr1-196578260:196578670	chr1	196578260	196578670	chr1	196578260	196578542	chr1-196578522:196578778	chr1	196578522	196578778	chr1
chr1	196945635	196954840	0.0909090909090911	-0.222315997205466	0.95	0.861904761904762	0.270426041486378	0.468546354076522	69	4.24134842003885e-09	HypoLow	chr1	196945685	196946685	Promoter	+	CFHR5	protein_coding	chr1	196945685	196946685	0.108636610537751	1	*	*	*	*	*	0	0	*	*	*	*	*	0	0	*	*	*	*	*	0	0	chr1-196946525:196946792	chr1	196946525	196946792	chr1
chr1	196945635	196954840	0.0909090909090911	-0.222315997205466	0.95	0.861904761904762	0.270426041486378	0.468546354076522	69	4.24134842003885e-09	HypoLow	chr1	196946686	196946852	FirstExon	+	CFHR5	protein_coding	chr1	196946686	196946852	0.0180336773492667	1	*	*	*	*	*	0	0	*	*	*	*	*	0	0	*	*	*	*	*	0	0	chr1-196946525:196946792	chr1	196946525	196946792	chr1
chr1	196945635	196954840	0.0909090909090911	-0.222315997205466	0.95	0.861904761904762	0.270426041486378	0.468546354076522	69	4.24134842003885e-09	HypoLow	chr1	196946853	196952014	Intron1	+	CFHR5	protein_coding	chr1	196946853	196952014	0.560673546985334	1	*	*	*	*	*	0	0	*	*	*	*	*	0	0	chr1-196951685:196951835	chr1	196951685	196951835	chr1	196951685	196951835	chr1-196949476:196949886	chr1	196949476	196949886	chr1
chr1	196945635	196954840	0.0909090909090911	-0.222315997205466	0.95	0.861904761904762	0.270426041486378	0.468546354076522	69	4.24134842003885e-09	HypoLow	chr1	196952015	196952209	Exon2	+	CFHR5	protein_coding	chr1	196952015	196952209	0.0210755024443237	1	*	*	*	*	*	0	0	*	*	*	*	*	0	0	*	*	*	*	*	0	0	*	*	*	*	*
chr1	196945635	196954840	0.0909090909090911	-0.222315997205466	0.95	0.861904761904762	0.270426041486378	0.468546354076522	69	4.24134842003885e-09	HypoLow	chr1	196952210	196953090	Intron2	+	CFHR5	protein_coding	chr1	196952210	196953090	0.0956002172732211	1	*	*	*	*	*	0	0	*	*	*	*	*	0	0	*	*	*	*	*	0	0	*	*	*	*	*
chr1	196945635	196954840	0.0909090909090911	-0.222315997205466	0.95	0.861904761904762	0.270426041486378	0.468546354076522	69	4.24134842003885e-09	HypoLow	chr1	196953091	196953267	Exon3	+	CFHR5	protein_coding	chr1	196953091	196953267	0.0191200434546442	1	*	*	*	*	*	0	0	*	*	*	*	*	0	0	*	*	*	*	*	0	0	*	*	*	*	*
chr1	196945635	196954840	0.0909090909090911	-0.222315997205466	0.95	0.861904761904762	0.270426041486378	0.468546354076522	69	4.24134842003885e-09	HypoLow	chr1	196953268	196963209	Intron3	+	CFHR5	protein_coding	chr1	196953268	196954840	0.170776751765345	0.158132984609194	*	*	*	*	*	0	0	*	*	*	*	*	0	0	*	*	*	*	*	0	0	chr1-196954445:196954717	chr1	196954445	196954717	chr1
chr1	196970278	196974928	0.074074074074074	-0.277913132871544	1	0.91304347826087	0	0.38003855950487	24	0.00194970764245487	HypoLow	chr1	196967435	196971611	Intron7	+	CFHR5	protein_coding	chr1	196970278	196971611	0.286666666666667	0.319204980842912	*	*	*	*	*	0	0	*	*	*	*	*	0	0	*	*	*	*	*	0	0	chr1-196971035:196971295	chr1	196971035	196971295	chr1
chr1	196970278	196974928	0.074074074074074	-0.277913132871544	1	0.91304347826087	0	0.38003855950487	24	0.00194970764245487	HypoLow	chr1	196971612	196971794	Exon8	+	CFHR5	protein_coding	chr1	196971612	196971794	0.0391397849462366	1	*	*	*	*	*	0	0	*	*	*	*	*	0	0	*	*	*	*	*	0	0	*	*	*	*	*
chr1	196970278	196974928	0.074074074074074	-0.277913132871544	1	0.91304347826087	0	0.38003855950487	24	0.00194970764245487	HypoLow	chr1	196971795	196973790	Intron8	+	CFHR5	protein_coding	chr1	196971795	196973790	0.429032258064516	1	*	*	*	*	*	0	0	*	*	*	*	*	0	0	*	*	*	*	*	0	0	chr1-196972720:196973060	chr1	196972720	196973060	chr1
chr1	196970278	196974928	0.074074074074074	-0.277913132871544	1	0.91304347826087	0	0.38003855950487	24	0.00194970764245487	HypoLow	chr1	196973791	196973973	Exon9	+	CFHR5	protein_coding	chr1	196973791	196973973	0.0391397849462366	1	*	*	*	*	*	0	0	*	*	*	*	*	0	0	*	*	*	*	*	0	0	*	*	*	*	*
chr1	196970278	196974928	0.074074074074074	-0.277913132871544	1	0.91304347826087	0	0.38003855950487	24	0.00194970764245487	HypoLow	chr1	196973974	196977616	Intron9	+	CFHR5	protein_coding	chr1	196973974	196974928	0.205161290322581	0.261943986820428	*	*	*	*	*	0	0	*	*	*	*	*	0	0	*	*	*	*	*	0	0	chr1-196974713:196974989	chr1	196974713	196974989	chr1
chr1	198665999	198676012	0.0995475113122171	-0.228012811879681	1	0.884615384615385	0	0.352759014408778	58	1.31986097041012e-12	HypoLow	chr1	198665841	198666038	Exon4	+	PTPRC	protein_coding	chr1	198665999	198666038	0.00389493658244282	0.197969543147208	*	*	*	*	*	0	0	*	*	*	*	*	0	0	*	*	*	*	*	0	0	*	*	*	*	*
chr1	198665999	198676012	0.0995475113122171	-0.228012811879681	1	0.884615384615385	0	0.352759014408778	58	1.31986097041012e-12	HypoLow	chr1	198666039	198668692	Intron4	+	PTPRC	protein_coding	chr1	198666039	198668692	0.264955557774893	1	*	*	*	*	*	0	0	*	*	*	*	*	0	0	chr1-198668560:198668870	chr1	198668560	198668870	chr1	198668560	198668692	chr1-198668600:198668890	chr1	198668600	198668890	chr1
chr1	198665999	198676012	0.0995475113122171	-0.228012811879681	1	0.884615384615385	0	0.352759014408778	58	1.31986097041012e-12	HypoLow	chr1	198668693	198668833	Exon5	+	PTPRC	protein_coding	chr1	198668693	198668833	0.0139818236292819	1	*	*	*	*	*	0	0	*	*	*	*	*	0	0	chr1-198668560:198668870	chr1	198668560	198668870	chr1	198668693	198668833	chr1-198668600:198668890	chr1	198668600	198668890	chr1
chr1	198665999	198676012	0.0995475113122171	-0.228012811879681	1	0.884615384615385	0	0.352759014408778	58	1.31986097041012e-12	HypoLow	chr1	198668834	198671515	Intron5	+	PTPRC	protein_coding	chr1	198668834	198671515	0.267751922500749	1	*	*	*	*	*	0	0	*	*	*	*	*	0	0	chr1-198670940:198671190	chr1	198670940	198671190	chr1	198670940	198671190	chr1-198671295:198671699	chr1	198671295	198671699	chr1
chr1	198665999	198676012	0.0995475113122171	-0.228012811879681	1	0.884615384615385	0	0.352759014408778	58	1.31986097041012e-12	HypoLow	chr1	198671516	198671659	Exon6	+	PTPRC	protein_coding	chr1	198671516	198671659	0.0142814341356237	1	*	*	*	*	*	0	0	*	*	*	*	*	0	0	*	*	*	*	*	0	0	chr1-198671295:198671699	chr1	198671295	198671699	chr1
chr1	198665999	198676012	0.0995475113122171	-0.228012811879681	1	0.884615384615385	0	0.352759014408778	58	1.31986097041012e-12	HypoLow	chr1	198671660	198672426	Intron6	+	PTPRC	protein_coding	chr1	198671660	198672426	0.0765005492859283	1	*	*	*	*	*	0	0	*	*	*	*	*	0	0	*	*	*	*	*	0	0	chr1-198671295:198671699	chr1	198671295	198671699	chr1
chr1	198665999	198676012	0.0995475113122171	-0.228012811879681	1	0.884615384615385	0	0.352759014408778	58	1.31986097041012e-12	HypoLow	chr1	198672427	198672501	Exon7	+	PTPRC	protein_coding	chr1	198672427	198672501	0.00739039248976331	1	*	*	*	*	*	0	0	*	*	*	*	*	0	0	*	*	*	*	*	0	0	*	*	*	*	*
chr1	198665999	198676012	0.0995475113122171	-0.228012811879681	1	0.884615384615385	0	0.352759014408778	58	1.31986097041012e-12	HypoLow	chr1	198672502	198673600	Intron7	+	PTPRC	protein_coding	chr1	198672502	198673600	0.109657445321083	1	*	*	*	*	*	0	0	*	*	*	*	*	0	0	*	*	*	*	*	0	0	*	*	*	*	*
chr1	198665999	198676012	0.0995475113122171	-0.228012811879681	1	0.884615384615385	0	0.352759014408778	58	1.31986097041012e-12	HypoLow	chr1	198673601	198673627	Exon8	+	PTPRC	protein_coding	chr1	198673601	198673627	0.00259662438829522	1	*	*	*	*	*	0	0	*	*	*	*	*	0	0	*	*	*	*	*	0	0	*	*	*	*	*
chr1	198665999	198676012	0.0995475113122171	-0.228012811879681	1	0.884615384615385	0	0.352759014408778	58	1.31986097041012e-12	HypoLow	chr1	198673628	198675862	Intron8	+	PTPRC	protein_coding	chr1	198673628	198675862	0.223109957055827	1	*	*	*	*	*	0	0	*	*	*	*	*	0	0	*	*	*	*	*	0	0	chr1-198675176:198675392	chr1	198675176	198675392	chr1
chr1	198665999	198676012	0.0995475113122171	-0.228012811879681	1	0.884615384615385	0	0.352759014408778	58	1.31986097041012e-12	HypoLow	chr1	198675863	198676081	Exon9	+	PTPRC	protein_coding	chr1	198675863	198676012	0.0148806551483072	0.68348623853211	*	*	*	*	*	0	0	*	*	*	*	*	0	0	*	*	*	*	*	0	0	*	*	*	*	*
chr1	200494584	200495332	0.66	0.228491765742445	0.83974358974359	0.0988235294117645	0.444957589191678	0.25166143543947	9	0.00186480186480186	HyperHigh	*	*	*	InterGenic	*	*	*	*	*	*	*	*	*	*	*	*	*	0	0	*	*	*	*	*	0	0	chr1-200494445:200495215	chr1	200494445	200495215	chr1	200494584	200495215	chr1-200494857:200495221	chr1	200494857	200495221	chr1
chr1	200941084	200941560	0.245098039215686	0.265346291211894	0.612299465240641	0.416666666666667	0.67221877667497	0.395538216614484	11	0.0817535829999502	HyperHigh	chr1	200938520	200943322	LastExon	-	KIF21B	protein_coding	chr1	200941084	200941560	1	0.0991253644314869	*	*	*	*	*	0	0	*	*	*	*	*	0	0	chr1-200941160:200941895	chr1	200941160	200941895	chr1	200941160	200941560	chr1-200941510:200941784	chr1	200941510	200941784	chr1
chr1	201083812	201084427	0.225	0.146886418598831	0.526315789473684	0.321428571428571	0.554832593066821	0.432931646898466	24	0.0180956249372154	HyperHigh	chr1	201083081	201085005	LastExon	-	ASCL5	protein_coding	chr1	201083812	201084427	1	0.31964656964657	CpG: 94	chr1	201083458	201084567	chr1	201083812	201084427	chr1:201084133-201084558	chr1	201084133	201084558	chr1	201084133	201084427	chr1-201083585:201084355	chr1	201083585	201084355	chr1	201083812	201084355	chr1-201084411:201084790	chr1	201084411	201084790	chr1
chr1	201551139	201573402	0.052631578947368	-0.21251250375535	0.95	0.875	0.167752778258549	0.399394649303933	192	7.83224385826732e-10	HypoLow	*	*	*	InterGenic	*	*	*	*	*	*	*	*	*	*	*	*	*	0	0	chr1:201572031-201572237	chr1	201572031	201572237	chr1	201572031	201572237	chr1-201572845:201573250	chr1	201572845	201573250	chr1	201572845	201573250	chr1-201573138:201573335	chr1	201573138	201573335	chr1
chr1	201617151	201618051	0.5	0.005625231922188	0.642857142857143	0.142857142857143	0.365265085000311	0.315457645328481	30	1.06472177005404e-09	HyperHigh	chr1	201598636	201617761	Intron2	+	NAV1	protein_coding	chr1	201617151	201617761	0.677777777777778	0.0318954248366013	CpG: 179	chr1	201617041	201619788	chr1	201617151	201617761	*	*	*	*	*	0	0	chr1-201617105:201617935	chr1	201617105	201617935	chr1	201617151	201617761	chr1-201617754:201618155	chr1	201617754	201618155	chr1
chr1	201617151	201618051	0.5	0.005625231922188	0.642857142857143	0.142857142857143	0.365265085000311	0.315457645328481	30	1.06472177005404e-09	HyperHigh	chr1	201617762	201618553	Exon3	+	NAV1	protein_coding	chr1	201617762	201618051	0.321111111111111	0.365360303413401	CpG: 179	chr1	201617041	201619788	chr1	201617762	201618051	*	*	*	*	*	0	0	chr1-201617965:201619855	chr1	201617965	201619855	chr1	201617965	201618051	chr1-201617967:201618575	chr1	201617967	201618575	chr1
chr1	201618672	201619743	0.314685314685314	-0.232227110033303	0.941176470588235	0.571428571428571	0.197224259527442	0.431945463097055	36	1.85268413539583e-08	HyperLow	chr1	201618554	201681944	Intron3	+	NAV1	protein_coding	chr1	201618672	201619743	1	0.0168954093705632	CpG: 179	chr1	201617041	201619788	chr1	201618672	201619743	chr1:201619383-201619798	chr1	201619383	201619798	chr1	201619383	201619743	chr1-201617965:201619855	chr1	201617965	201619855	chr1	201618672	201619743	chr1-201619690:201620328	chr1	201619690	201620328	chr1
chr1	201755391	201764727	0.0625	-0.240642698295787	1	0.888888888888889	0.216674140549451	0.381703471460528	74	5.75012303162719e-05	HypoLow	chr1	201754480	201755556	Intron10	+	NAV1	protein_coding	chr1	201755391	201755556	0.0176735218508997	0.153345724907063	*	*	*	*	*	0	0	*	*	*	*	*	0	0	chr1-201755340:201755655	chr1	201755340	201755655	chr1	201755391	201755556	chr1-201755282:201755526	chr1	201755282	201755526	chr1
chr1	201755391	201764727	0.0625	-0.240642698295787	1	0.888888888888889	0.216674140549451	0.381703471460528	74	5.75012303162719e-05	HypoLow	chr1	201755557	201755705	Exon11	+	NAV1	protein_coding	chr1	201755557	201755705	0.0158526135389889	1	*	*	*	*	*	0	0	*	*	*	*	*	0	0	chr1-201755340:201755655	chr1	201755340	201755655	chr1	201755557	201755655	*	*	*	*	*
chr1	201755391	201764727	0.0625	-0.240642698295787	1	0.888888888888889	0.216674140549451	0.381703471460528	74	5.75012303162719e-05	HypoLow	chr1	201755706	201758867	Intron11	+	NAV1	protein_coding	chr1	201755706	201758867	0.338581833761782	1	*	*	*	*	*	0	0	*	*	*	*	*	0	0	chr1-201758725:201758875	chr1	201758725	201758875	chr1	201758725	201758867	chr1-201757316:201757960	chr1	201757316	201757960	chr1
chr1	201755391	201764727	0.0625	-0.240642698295787	1	0.888888888888889	0.216674140549451	0.381703471460528	74	5.75012303162719e-05	HypoLow	chr1	201758868	201758920	Exon12	+	NAV1	protein_coding	chr1	201758868	201758920	0.00556983718937446	1	*	*	*	*	*	0	0	*	*	*	*	*	0	0	chr1-201758725:201758875	chr1	201758725	201758875	chr1	201758868	201758875	*	*	*	*	*
chr1	201755391	201764727	0.0625	-0.240642698295787	1	0.888888888888889	0.216674140549451	0.381703471460528	74	5.75012303162719e-05	HypoLow	chr1	201758921	201759681	Intron12	+	NAV1	protein_coding	chr1	201758921	201759681	0.0814053127677806	1	*	*	*	*	*	0	0	*	*	*	*	*	0	0	chr1-201759420:201759690	chr1	201759420	201759690	chr1	201759420	201759681	chr1-201759429:201759704	chr1	201759429	201759704	chr1
chr1	201755391	201764727	0.0625	-0.240642698295787	1	0.888888888888889	0.216674140549451	0.381703471460528	74	5.75012303162719e-05	HypoLow	chr1	201759682	201759705	Exon13	+	NAV1	protein_coding	chr1	201759682	201759705	0.00246358183376178	1	*	*	*	*	*	0	0	*	*	*	*	*	0	0	chr1-201759420:201759690	chr1	201759420	201759690	chr1	201759682	201759690	chr1-201759429:201759704	chr1	201759429	201759704	chr1
chr1	201755391	201764727	0.0625	-0.240642698295787	1	0.888888888888889	0.216674140549451	0.381703471460528	74	5.75012303162719e-05	HypoLow	chr1	201759706	201759816	Intron13	+	NAV1	protein_coding	chr1	201759706	201759816	0.0117823479005998	1	*	*	*	*	*	0	0	*	*	*	*	*	0	0	chr1-201759720:201759950	chr1	201759720	201759950	chr1	201759720	201759816	chr1-201759410:201759850	chr1	201759410	201759850	chr1
chr1	201755391	201764727	0.0625	-0.240642698295787	1	0.888888888888889	0.216674140549451	0.381703471460528	74	5.75012303162719e-05	HypoLow	chr1	201759817	201759894	Exon14	+	NAV1	protein_coding	chr1	201759817	201759894	0.00824764353041988	1	*	*	*	*	*	0	0	*	*	*	*	*	0	0	chr1-201759720:201759950	chr1	201759720	201759950	chr1	201759817	201759894	chr1-201759410:201759850	chr1	201759410	201759850	chr1
chr1	201755391	201764727	0.0625	-0.240642698295787	1	0.888888888888889	0.216674140549451	0.381703471460528	74	5.75012303162719e-05	HypoLow	chr1	201759895	201762919	Intron14	+	NAV1	protein_coding	chr1	201759895	201762919	0.323907455012853	1	*	*	*	*	*	0	0	*	*	*	*	*	0	0	chr1-201762720:201763075	chr1	201762720	201763075	chr1	201762720	201762919	chr1-201762591:201762881	chr1	201762591	201762881	chr1
chr1	201755391	201764727	0.0625	-0.240642698295787	1	0.888888888888889	0.216674140549451	0.381703471460528	74	5.75012303162719e-05	HypoLow	chr1	201762920	201763003	Exon15	+	NAV1	protein_coding	chr1	201762920	201763003	0.00889031705227078	1	*	*	*	*	*	0	0	*	*	*	*	*	0	0	chr1-201762720:201763075	chr1	201762720	201763075	chr1	201762920	201763003	chr1-201761766:201762932	chr1	201761766	201762932	chr1
chr1	201755391	201764727	0.0625	-0.240642698295787	1	0.888888888888889	0.216674140549451	0.381703471460528	74	5.75012303162719e-05	HypoLow	chr1	201763004	201763593	Intron15	+	NAV1	protein_coding	chr1	201763004	201763593	0.06308911739503	1	*	*	*	*	*	0	0	*	*	*	*	*	0	0	chr1-201763105:201763255	chr1	201763105	201763255	chr1	201763105	201763255	*	*	*	*	*
chr1	201755391	201764727	0.0625	-0.240642698295787	1	0.888888888888889	0.216674140549451	0.381703471460528	74	5.75012303162719e-05	HypoLow	chr1	201763594	201763705	Exon16	+	NAV1	protein_coding	chr1	201763594	201763705	0.0118894601542416	1	*	*	*	*	*	0	0	*	*	*	*	*	0	0	*	*	*	*	*	0	0	*	*	*	*	*
chr1	201755391	201764727	0.0625	-0.240642698295787	1	0.888888888888889	0.216674140549451	0.381703471460528	74	5.75012303162719e-05	HypoLow	chr1	201763706	201772720	Intron16	+	NAV1	protein_coding	chr1	201763706	201764727	0.109361610968295	0.113268249389838	*	*	*	*	*	0	0	*	*	*	*	*	0	0	chr1-201764105:201764490	chr1	201764105	201764490	chr1	201764105	201764490	chr1-201764295:201764579	chr1	201764295	201764579	chr1
chr1	201755391	201764727	0.0625	-0.240642698295787	1	0.888888888888889	0.216674140549451	0.381703471460528	74	5.75012303162719e-05	HypoLow	chr1	201657542	201786354	Intron2	-	IPO9-AS1	antisense	chr1	201755391	201764727	1	0.0724777194671304	*	*	*	*	*	0	0	*	*	*	*	*	0	0	chr1-201764105:201764490	chr1	201764105	201764490	chr1	201764105	201764490	chr1-201764295:201764579	chr1	201764295	201764579	chr1
chr1	201915303	201915949	0.1	0.240039363246786	0.230769230769231	0.0769230769230769	0.486382639009082	0.270426041486378	22	0.0171442365627311	HypoHigh	chr1	201915208	201915715	FirstExon	-	LMOD1	protein_coding	chr1	201915303	201915715	0.637770897832817	0.812623274161736	*	*	*	*	*	0	0	*	*	*	*	*	0	0	chr1-201915385:201916035	chr1	201915385	201916035	chr1	201915385	201915715	chr1-201915687:201915943	chr1	201915687	201915943	chr1
chr1	201915303	201915949	0.1	0.240039363246786	0.230769230769231	0.0769230769230769	0.486382639009082	0.270426041486378	22	0.0171442365627311	HypoHigh	chr1	201915716	201916716	Promoter	-	LMOD1	protein_coding	chr1	201915716	201915949	0.360681114551084	0.233	*	*	*	*	*	0	0	*	*	*	*	*	0	0	chr1-201915385:201916035	chr1	201915385	201916035	chr1	201915716	201915949	chr1-201915888:201916598	chr1	201915888	201916598	chr1
chr1	202935937	202936250	0.176470588235294	0.313095502188221	0.5	0.0833333333333333	0.666666666666667	0.222854814399865	12	0.0325872710426173	HypoHigh	chr1	202935877	202936026	Exon2	-	CYB5R1	protein_coding	chr1	202935937	202936026	0.284345047923323	0.597315436241611	*	*	*	*	*	0	0	*	*	*	*	*	0	0	chr1-202935460:202936235	chr1	202935460	202936235	chr1	202935937	202936026	chr1-202936018:202936402	chr1	202936018	202936402	chr1
chr1	202935937	202936250	0.176470588235294	0.313095502188221	0.5	0.0833333333333333	0.666666666666667	0.222854814399865	12	0.0325872710426173	HypoHigh	chr1	202936027	202936318	Intron1	-	CYB5R1	protein_coding	chr1	202936027	202936250	0.712460063897764	0.766323024054983	CpG: 19	chr1	202936045	202936252	chr1	202936045	202936250	*	*	*	*	*	0	0	chr1-202935460:202936235	chr1	202935460	202936235	chr1	202936027	202936235	chr1-202936244:202936417	chr1	202936244	202936417	chr1
chr1	203102934	203103694	0.166666666666667	0.292704540761318	0.5	0.1	0.494451918327229	0.216674140549451	14	0.110481879578752	HypoHigh	chr1	203098311	203134388	Intron5	+	ADORA1	protein_coding	chr1	203102934	203103694	1	0.0210660531640657	*	*	*	*	*	0	0	*	*	*	*	*	0	0	chr1-203103505:203103755	chr1	203103505	203103755	chr1	203103505	203103694	chr1-203103178:203103292	chr1	203103178	203103292	chr1
chr1	203136952	203138945	0.0954545454545455	-0.221643613723331	0.98	0.875	0.134176735655481	0.350033119915121	33	0.00038347988175791	HypoLow	chr1	203136939	203137219	LastExon	-	MYBPH	protein_coding	chr1	203136952	203137219	0.133968891118916	0.953571428571429	*	*	*	*	*	0	0	*	*	*	*	*	0	0	chr1-203136460:203137255	chr1	203136460	203137255	chr1	203136952	203137219	*	*	*	*	*
chr1	203136952	203138945	0.0954545454545455	-0.221643613723331	0.98	0.875	0.134176735655481	0.350033119915121	33	0.00038347988175791	HypoLow	chr1	203137220	203137754	Intron10	-	MYBPH	protein_coding	chr1	203137220	203137754	0.267937782237832	1	*	*	*	*	*	0	0	*	*	*	*	*	0	0	chr1-203137525:203138195	chr1	203137525	203138195	chr1	203137525	203137754	chr1-203137532:203137748	chr1	203137532	203137748	chr1
chr1	203136952	203138945	0.0954545454545455	-0.221643613723331	0.98	0.875	0.134176735655481	0.350033119915121	33	0.00038347988175791	HypoLow	chr1	203137755	203137803	Exon10	-	MYBPH	protein_coding	chr1	203137755	203137803	0.0240842950326141	1	*	*	*	*	*	0	0	*	*	*	*	*	0	0	chr1-203137525:203138195	chr1	203137525	203138195	chr1	203137755	203137803	*	*	*	*	*
chr1	203136952	203138945	0.0954545454545455	-0.221643613723331	0.98	0.875	0.134176735655481	0.350033119915121	33	0.00038347988175791	HypoLow	chr1	203137804	203138033	Intron9	-	MYBPH	protein_coding	chr1	203137804	203138033	0.11490215755143	1	*	*	*	*	*	0	0	*	*	*	*	*	0	0	chr1-203137525:203138195	chr1	203137525	203138195	chr1	203137804	203138033	*	*	*	*	*
chr1	203136952	203138945	0.0954545454545455	-0.221643613723331	0.98	0.875	0.134176735655481	0.350033119915121	33	0.00038347988175791	HypoLow	chr1	203138034	203138220	Exon9	-	MYBPH	protein_coding	chr1	203138034	203138220	0.0933266432513798	1	*	*	*	*	*	0	0	*	*	*	*	*	0	0	chr1-203137525:203138195	chr1	203137525	203138195	chr1	203138034	203138195	*	*	*	*	*
chr1	203136952	203138945	0.0954545454545455	-0.221643613723331	0.98	0.875	0.134176735655481	0.350033119915121	33	0.00038347988175791	HypoLow	chr1	203138221	203138380	Intron8	-	MYBPH	protein_coding	chr1	203138221	203138380	0.0797792272955344	1	*	*	*	*	*	0	0	*	*	*	*	*	0	0	*	*	*	*	*	0	0	*	*	*	*	*
chr1	203136952	203138945	0.0954545454545455	-0.221643613723331	0.98	0.875	0.134176735655481	0.350033119915121	33	0.00038347988175791	HypoLow	chr1	203138381	203138517	Exon8	-	MYBPH	protein_coding	chr1	203138381	203138517	0.0682388359257401	1	*	*	*	*	*	0	0	*	*	*	*	*	0	0	chr1-203138405:203138655	chr1	203138405	203138655	chr1	203138405	203138517	chr1-203138465:203138865	chr1	203138465	203138865	chr1
chr1	203136952	203138945	0.0954545454545455	-0.221643613723331	0.98	0.875	0.134176735655481	0.350033119915121	33	0.00038347988175791	HypoLow	chr1	203138518	203139418	Intron7	-	MYBPH	protein_coding	chr1	203138518	203138945	0.214249874560963	0.474444444444444	*	*	*	*	*	0	0	*	*	*	*	*	0	0	chr1-203138845:203139115	chr1	203138845	203139115	chr1	203138845	203138945	chr1-203138929:203139239	chr1	203138929	203139239	chr1
chr1	203617630	203620759	0.126190476190476	-0.245489214007779	0.888888888888889	0.764705882352941	0.257742782841639	0.483969205023802	38	0.00194135830534362	HypoLow	chr1	203596348	203651869	Intron1	+	ATP2B4	protein_coding	chr1	203617630	203620759	1	0.0563570540876425	*	*	*	*	*	0	0	chr1:203619380-203619832	chr1	203619380	203619832	chr1	203619380	203619832	chr1-203619320:203619955	chr1	203619320	203619955	chr1	203619320	203619955	chr1-203620053:203620247	chr1	203620053	203620247	chr1
chr1	204182914	204183317	0.283671679197996	0.19079189119011	0.441558441558442	0.107619047619048	0.522676778621403	0.319435149842552	19	0.000176396115078879	HyperHigh	chr1	204172116	204183009	Intron1	-	GOLT1A	protein_coding	chr1	204182914	204183009	0.235732009925558	0.00872119709905444	*	*	*	*	*	0	0	*	*	*	*	*	0	0	chr1-204182825:204183675	chr1	204182825	204183675	chr1	204182914	204183009	chr1-204183007:204183711	chr1	204183007	204183711	chr1
chr1	204182914	204183317	0.283671679197996	0.19079189119011	0.441558441558442	0.107619047619048	0.522676778621403	0.319435149842552	19	0.000176396115078879	HyperHigh	chr1	204183010	204183220	FirstExon	-	GOLT1A	protein_coding	chr1	204183010	204183220	0.521091811414392	1	*	*	*	*	*	0	0	*	*	*	*	*	0	0	chr1-204182825:204183675	chr1	204182825	204183675	chr1	204183010	204183220	chr1-204183209:204183449	chr1	204183209	204183449	chr1
[truncated: 12,208 more rows]
[truncated: 2 more columns]

## Sheet: README
The table reports DMRs identified in sample AML2 at Relapse vs Tumor (first diagnosis). For each DMR we report all the fields of the annotated PoreMeth2 output as documented on GitHub (https://github.com/Lab-CoMBINE/PoreMeth2).
