# Supplementary material for: PoreMeth2 for decoding the evolution of methylome alterations with nanopore sequencing
Source: HighWire-hosted journal article supplement (doi:10.1101/gr.280259.124), 2025-10-20
Supplement: Supplemental_Table_4.xlsx [file Supplemental_Table_4.xlsx]

## Sheet: AML2
symbol	baseMean	log2FoldChange	lfcSE	stat	pvalue	padj
RPL11	76430	0.350615	0.00824117	42.5443	0	0
HIST2H2AC	1341.93	-2.30263	0.0596506	-38.602	0	0
RPS27	80038.4	0.359629	0.00870001	41.3366	0	0
HNRNPU	8442.57	-0.887517	0.0208509	-42.5649	0	0
CXCR4	2623.55	-2.24431	0.0413872	-54.2271	0	0
HNRNPA3	6120.82	-0.90835	0.024171	-37.5801	0	0
STK17B	1578.34	-2.43126	0.0586895	-41.4257	0	0
NCL	8701.52	-1.14434	0.0236072	-48.4741	0	0
RPL32	98421.8	0.33227	0.00763502	43.5193	0	0
RPSA	49719.9	0.531303	0.0100564	52.8323	0	0
RPL14	41491.9	0.378518	0.0100248	37.7581	0	0
RPL29	61359.8	0.359768	0.00896378	40.1358	0	0
RPL9	63435	0.500689	0.00883322	56.6825	0	0
CXCL8	4037.96	-4.36625	0.0939758	-46.4614	0	0
EREG	9182.28	-2.01583	0.0221188	-91.1368	0	0
RPS3A	125677	0.387791	0.00778594	49.8066	0	0
PIK3R1	2745.47	-1.93228	0.0385392	-50.1381	0	0
RPS23	112890	0.289081	0.00764728	37.8018	0	0
HIST1H1E	3970.57	-3.04778	0.0771764	-39.4911	0	0
HIST1H1D	6371.5	-2.45258	0.0474582	-51.6787	0	0
HIST1H1B	1540.4	-2.48947	0.0585795	-42.4973	0	0
HLA-A	11519	1.04317	0.0179138	58.2331	0	0
HLA-B	7676.92	0.809602	0.021347	37.9258	0	0
RPL10A	58695.4	0.393278	0.00929444	42.3132	0	0
HSP90AB1	21499.9	-0.583116	0.0137486	-42.4127	0	0
EEF1A1	177986	0.564896	0.00706047	80.0082	0	0
BCLAF1	3418.04	-1.27714	0.0335425	-38.0752	0	0
RPS4X	123415	0.316378	0.00727746	43.4736	0	0
TSC22D3	2837.53	-1.79628	0.0419341	-42.8358	0	0
RPL10	131619	0.359258	0.00727265	49.3986	0	0
RPL30	79041.6	0.442542	0.00841092	52.6152	0	0
EIF3E	12233.1	0.67207	0.0177143	37.9394	0	0
RPS13	63255.2	0.547258	0.00925594	59.125	0	0
HSPA8	6838.8	1.0417	0.0241238	43.1815	0	0
SRGN	14129	-0.964296	0.0204681	-47.1122	0	0
CD69	1807.77	-2.16846	0.0505843	-42.8682	0	0
EIF4B	3926.11	-1.44951	0.0306958	-47.2219	0	0
NACA	39228.5	0.441079	0.0110635	39.8681	0	0
TPT1	186362	0.509354	0.00708799	71.8615	0	0
B2M	37279.8	1.05184	0.01099	95.7083	0	0
RPL23A	49068.2	0.670621	0.00934323	71.7762	0	0
RPL23	13782.3	-0.775184	0.0172825	-44.8537	0	0
AC004687.1	1747.78	2.10902	0.050546	41.7249	0	0
TPM4	3384.98	-2.08146	0.0362328	-57.4469	0	0
KLF2	2656.29	-1.94959	0.0436029	-44.7125	0	0
RPL18A	72839.6	0.35019	0.00826132	42.3891	0	0
JUND	11690.5	-1.08256	0.0184789	-58.5837	0	0
MIF	3210.04	1.38492	0.0340311	40.6958	0	0
MT-CO1	163080	0.298468	0.00728877	40.949	0	0
MT-CO2	199476	0.503121	0.00695194	72.3713	0	0
MT-ATP6	265156	0.416409	0.00598578	69.5663	0	0
MT-CO3	288958	0.586233	0.00571223	102.628	0	0
MT-ND3	146376	0.592542	0.00811401	73.027	0	0
MT-ND4L	15541.4	-1.06137	0.0180175	-58.908	0	0
MT-CYB	153164	0.438166	0.00698119	62.7638	0	0
RPS24	120445	0.297524	0.00801858	37.1043	2.39812e-301	7.14296e-299
RACK1	50331.1	0.36109	0.00983983	36.6968	8.22332e-295	2.4064e-292
CD74	6606.82	0.847314	0.0231363	36.6227	1.24586e-293	3.58292e-291
CPA3	2181.55	-1.56715	0.0432638	-36.2232	2.63059e-287	7.437e-285
RPS21	25266.8	-0.441421	0.0121937	-36.2006	5.9498e-287	1.65405e-284
HIST1H1C	4421.02	-1.13303	0.0316873	-35.7566	5.22871e-280	1.42975e-277
HLA-C	5482.81	0.884601	0.0248447	35.6052	1.1647e-277	3.13343e-275
PMAIP1	2202.16	-1.60172	0.045171	-35.4591	2.1022e-275	5.56582e-273
RPL17	3591.4	1.13228	0.0321283	35.2424	4.48964e-272	1.17011e-269
RPS2	133424	0.257924	0.00739452	34.8803	1.47656e-266	3.78908e-264
ACTB	21924.4	0.565487	0.0162625	34.7725	6.33102e-265	1.60002e-262
DDX3X	4366.61	-0.99119	0.0286959	-34.5411	1.93771e-261	4.82404e-259
H2AFY	14923.3	0.546296	0.0158397	34.489	1.17336e-260	2.87819e-258
HBA1	30479.2	-3.02053	0.0877248	-34.4319	8.40735e-260	2.03239e-257
TMPO	3100.85	-1.26413	0.0367771	-34.3729	6.41594e-259	1.52883e-256
RPL5	53032	0.336287	0.00980591	34.2943	9.53196e-258	2.23934e-255
RPS5	42075.2	0.336467	0.00984043	34.1924	3.1412e-256	7.27712e-254
RPS3	90499.3	0.273502	0.00800317	34.1742	5.84716e-256	1.33604e-253
MT-ND1	133623	0.242526	0.00711315	34.0955	8.61019e-255	1.94078e-252
ARL5B	881.052	-2.50958	0.0736702	-34.0651	2.42789e-254	5.39962e-252
PNRC1	4590.54	-0.937176	0.0275192	-34.0554	3.37642e-254	7.41035e-252
DYNLL1	4600.62	0.954917	0.0281947	33.8687	1.92671e-251	4.17371e-249
RPL19	75455.2	0.279529	0.00836024	33.4355	4.18522e-245	8.94994e-243
HBA2	42019.1	-2.88835	0.0870787	-33.1694	2.97538e-241	6.2822e-239
SMCHD1	2301.6	-1.29613	0.0396087	-32.7233	7.28155e-235	1.5182e-232
TOP2B	3110.33	-1.10209	0.0337336	-32.6704	4.11945e-234	8.48301e-232
RGS2	754.918	-2.75711	0.084421	-32.6591	5.96005e-234	1.21236e-231
ARGLU1	5261.95	-0.839042	0.0257203	-32.6218	2.01153e-233	4.04244e-231
NFIL3	741.328	-2.85137	0.0877217	-32.5047	9.15066e-232	1.81706e-229
RPL24	36614	0.372951	0.0115983	32.1556	7.37279e-227	1.4468e-224
XIST	13474	-0.531246	0.0166556	-31.896	3.03127e-223	5.87925e-221
FOSL2	1148.77	-1.98485	0.0632154	-31.3982	2.13808e-216	4.09922e-214
IRF2BP2	3887.32	-0.956827	0.0305855	-31.2836	7.78765e-215	1.47611e-212
SRRM2	4287.65	-0.919437	0.0294176	-31.2546	1.93175e-214	3.62041e-212
RPL8	40477.7	0.313213	0.0100904	31.0407	1.52334e-211	2.82325e-209
ZFP36L2	20850.9	-0.410196	0.0133401	-30.7492	1.25397e-207	2.29848e-205
IL1RL1	491.017	-4.16928	0.13611	-30.6316	4.64322e-206	8.41836e-204
HINT1	16876.2	0.44833	0.0147035	30.4914	3.3917e-204	6.08319e-202
PRKDC	2791.86	-1.09685	0.0363957	-30.137	1.59025e-199	2.82186e-197
JUN	5289.26	-0.950104	0.0318559	-29.825	1.85224e-195	3.25215e-193
RPL15	70697.4	0.260538	0.00874165	29.8042	3.44819e-195	5.99124e-193
MAP3K8	729.558	-2.34157	0.0786489	-29.7725	8.87313e-195	1.52581e-192
RPS7	53707.8	0.294567	0.00992485	29.6797	1.40285e-193	2.38771e-191
SF3B1	3764.5	-0.895736	0.0303231	-29.5397	8.89491e-192	1.49866e-189
MACF1	4475.12	-0.849394	0.0288223	-29.47	6.97995e-191	1.16426e-188
LCP1	4508.45	-0.821619	0.0281788	-29.1573	6.75314e-187	1.11527e-184
NAP1L1	8944.15	-0.565877	0.0195089	-29.0061	5.51107e-185	9.01222e-183
ITPR2	1991.97	-1.30428	0.0451007	-28.9194	6.81901e-184	1.10428e-181
RPL6	47653.5	0.279236	0.00965812	28.9121	8.42316e-184	1.35095e-181
RPL27	23534.5	0.36521	0.0126461	28.8794	2.16911e-183	3.44579e-181
NFKBIA	1953.92	-1.3344	0.0463483	-28.7908	2.80011e-182	4.40622e-180
GAPDH	45800.7	0.292706	0.0101674	28.7886	2.97758e-182	4.64169e-180
PLCG2	1234.94	-1.61697	0.0565907	-28.5731	1.45295e-179	2.244e-177
CHD4	3092.46	-0.960979	0.0336578	-28.5514	2.6952e-179	4.12441e-177
TSC22D1	1651.84	-1.44085	0.0505779	-28.4878	1.6607e-178	2.51823e-176
RPL7A	65867.5	0.250361	0.00879376	28.4703	2.73334e-178	4.1074e-176
RPS27A	68542.5	0.259651	0.00916881	28.3189	2.02238e-176	3.0119e-174
ACTG1	23844.7	0.364642	0.0129414	28.1764	1.13917e-174	1.68153e-172
TFRC	922.033	-2.05786	0.073241	-28.0971	1.06257e-173	1.55471e-171
LYL1	4598.83	0.818162	0.0292246	27.9957	1.83397e-172	2.66005e-170
SPTBN1	1486.76	-1.40181	0.050092	-27.9847	2.4939e-172	3.58605e-170
EPB41	1446.62	-1.40528	0.0502177	-27.9837	2.5629e-172	3.65378e-170
BTG1	5142.88	-0.766066	0.027406	-27.9525	6.15113e-172	8.69499e-170
SFPQ	5306.51	-0.719959	0.0259801	-27.712	5.01114e-169	7.02402e-167
BHLHE41	612.058	-2.58193	0.093416	-27.639	3.7809e-168	5.25545e-166
RPS11	40782.4	-0.282425	0.0103518	-27.2826	6.81922e-164	9.40038e-162
ITGA4	2340.02	-1.06123	0.0389479	-27.2474	1.78366e-163	2.43865e-161
RPS29	42427.1	0.278029	0.0102046	27.2455	1.87864e-163	2.54762e-161
VPS13C	1688.78	-1.26158	0.0463267	-27.2323	2.69391e-163	3.62374e-161
CD2	501.35	2.78274	0.102275	27.2084	5.16075e-163	6.88651e-161
TENT5C	807.811	-1.94427	0.0715792	-27.1624	1.80558e-162	2.39024e-160
OAZ1	9427.54	0.556053	0.0205452	27.0649	2.55036e-161	3.34961e-159
MT-ATP8	3480.93	-0.864372	0.0322101	-26.8354	1.24826e-158	1.62664e-156
RPL18	61134.3	0.247938	0.00924193	26.8275	1.54545e-158	1.9983e-156
ARRDC3	743.54	-2.02461	0.0756521	-26.7621	8.9361e-158	1.14657e-155
PCM1	3205.4	-0.893287	0.0334852	-26.6771	8.6911e-157	1.10662e-154
KMT2E	3259.42	-0.868585	0.0325826	-26.6579	1.44773e-156	1.82941e-154
ARHGAP5	1320.74	-1.45435	0.0548342	-26.5226	5.31897e-155	6.6707e-153
KLF3	1048.52	-1.60782	0.0607053	-26.4857	1.41631e-154	1.76299e-152
LINC01088	398.393	3.00666	0.113956	26.3844	2.07011e-153	2.55774e-151
EIF2AK1	1455.92	-1.33625	0.0507119	-26.3499	5.14947e-153	6.31567e-151
RPL37	72313.3	0.234288	0.00892176	26.2603	5.45268e-152	6.63873e-150
NIN	2173.87	-1.06166	0.0404712	-26.2325	1.13244e-151	1.36877e-149
H3F3B	16385.3	-0.407193	0.0155612	-26.1672	6.28206e-151	7.53847e-149
HNRNPDL	3990.31	-0.757045	0.0289959	-26.1087	2.90063e-150	3.4559e-148
MYL12A	2879.22	0.951623	0.0364918	26.0778	6.52015e-150	7.71319e-148
BTF3	19639	0.355433	0.0137708	25.8107	6.7284e-147	7.9035e-145
TPR	3373.17	-0.84615	0.0330951	-25.5672	3.53369e-144	4.12182e-142
LBR	2753.42	-0.917345	0.0359385	-25.5254	1.02977e-143	1.19281e-141
HNRNPD	4102.68	-0.767693	0.0300878	-25.5151	1.33901e-143	1.54033e-141
ARHGDIB	7127.5	0.570839	0.0224115	25.4709	4.1463e-143	4.73701e-141
MYL12B	5124.32	0.654718	0.0258772	25.301	3.11732e-141	3.53721e-139
OSBPL8	1778.49	-1.10956	0.0441637	-25.1238	2.73194e-139	3.07897e-137
SMARCA5	1901.61	-1.12552	0.0447993	-25.1235	2.75201e-139	3.08077e-137
PRRC2C	3899.88	-0.770402	0.0307251	-25.074	9.55297e-139	1.06229e-136
RPL35A	55961	0.237935	0.0095236	24.9837	9.18226e-138	1.01431e-135
ARPC3	8189.15	0.518351	0.0207505	24.9801	1.00568e-137	1.1036e-135
TPM3	5367.44	-0.72164	0.0289402	-24.9355	3.06465e-137	3.34107e-135
PDZD8	845.967	-1.73745	0.0698395	-24.8777	1.29696e-136	1.40476e-134
COMT	2496.69	0.917925	0.0370376	24.7836	1.34679e-135	1.44932e-133
CHST12	2461.74	0.937034	0.0380584	24.621	7.53459e-134	8.05621e-132
LST1	1982.4	1.03149	0.0419585	24.5836	1.89394e-133	2.01216e-131
YWHAZ	2634.6	-0.91121	0.0371053	-24.5574	3.60744e-133	3.80836e-131
AREG	1702.82	-9.50509	0.387386	-24.5365	6.02671e-133	6.32236e-131
REL	1521.21	-1.20734	0.0492977	-24.4908	1.84951e-132	1.92812e-130
PHF3	2080.45	-1.07743	0.0441616	-24.3975	1.81774e-131	1.88323e-129
SPRY1	509.155	-2.25922	0.0930779	-24.2723	3.84312e-130	3.95699e-128
SETD2	1251.25	-1.40333	0.0586056	-23.9454	1.0328e-126	1.05688e-124
KRT1	313.339	-4.52653	0.189377	-23.9021	2.90923e-126	2.9589e-124
TRIP12	1255.8	-1.34866	0.0564989	-23.8705	6.19861e-126	6.26624e-124
RAD21	2661.75	-0.969838	0.0406303	-23.8698	6.30191e-126	6.33228e-124
NOP53	10767.8	0.454773	0.019096	23.8151	2.33004e-125	2.32725e-123
NIPBL	2407.11	-0.923998	0.03887	-23.7715	6.58581e-125	6.53877e-123
MSL2	1295.28	-1.28387	0.0542864	-23.6499	1.18173e-123	1.16635e-121
RPL41	85292.3	-0.197574	0.0083668	-23.6141	2.76333e-123	2.71132e-121
CCL3	388.588	-2.72276	0.115595	-23.5542	1.13675e-122	1.10883e-120
TNFAIP3	335.331	-3.62525	0.154727	-23.4299	2.11685e-121	2.05286e-119
PDLIM1	3362.28	0.741785	0.0317905	23.3335	2.02646e-120	1.95384e-118
SPAG9	984.801	-1.47502	0.0632616	-23.3162	3.03991e-120	2.91412e-118
PRPF4B	2165.36	-0.957301	0.0410972	-23.2936	5.14881e-120	4.90755e-118
ARMH1	6483.14	0.537675	0.023121	23.2548	1.27086e-119	1.20443e-117
ZEB2	4027.09	-0.713868	0.0307676	-23.202	4.34884e-119	4.09823e-117
FTL	29348.5	0.321453	0.0139066	23.1152	3.25805e-118	3.05305e-116
HP1BP3	3567.16	-0.726737	0.0314512	-23.1068	3.9529e-118	3.68348e-116
HLA-DRA	4578.75	0.64692	0.0281597	22.9732	8.63451e-117	8.00131e-115
ZNF331	539.276	-2.00233	0.0877014	-22.8312	2.24728e-115	2.07098e-113
C9orf139	828.794	1.53445	0.0672923	22.8028	4.30383e-115	3.94439e-113
RIOK3	874.561	-1.4831	0.0650608	-22.7955	5.07671e-115	4.6273e-113
PAK2	1977.14	-0.947603	0.0415907	-22.784	6.6025e-115	5.98531e-113
DEK	6839.72	-0.510732	0.0224824	-22.7169	3.04747e-114	2.74767e-112
CCNA1	787.46	-1.6184	0.0712555	-22.7126	3.36181e-114	3.01479e-112
JMJD1C	3371.11	-0.715269	0.0316423	-22.6048	3.88572e-113	3.46598e-111
GOLGB1	1568.54	-1.08709	0.0481628	-22.5712	8.31482e-113	7.37719e-111
CDV3	1840.18	-0.999618	0.0442911	-22.5693	8.68933e-113	7.66867e-111
RPS15A	65777.9	0.198331	0.00881331	22.5035	3.83446e-112	3.36626e-110
GTF2I	3149.64	-0.750209	0.0333554	-22.4914	5.03993e-112	4.40137e-110
EBPL	2750.53	0.783553	0.0348984	22.4524	1.21214e-111	1.05305e-109
MED13L	2009.27	-0.923109	0.0411818	-22.4155	2.78132e-111	2.40375e-109
SMARCA2	2003.47	-0.977584	0.0437956	-22.3215	2.28513e-110	1.96474e-108
RPL39	72366.6	0.200992	0.00900502	22.32	2.36487e-110	2.02287e-108
PER1	305.236	-2.95341	0.132325	-22.3193	2.39849e-110	2.04117e-108
TMEM173	3089.67	0.778015	0.0348815	22.3046	3.3371e-110	2.82552e-108
MSRB3	1180.02	-1.2238	0.054998	-22.2518	1.08428e-109	9.13425e-108
BIRC6	1460.38	-1.08125	0.0487141	-22.1957	3.77624e-109	3.16521e-107
BMI1	1288.75	-1.17498	0.0531099	-22.1235	1.87871e-108	1.56684e-106
HNRNPC	4888.62	-0.595381	0.0269136	-22.1219	1.94632e-108	1.61515e-106
FTH1	29124.9	-0.27796	0.0125692	-22.1144	2.29781e-108	1.8974e-106
NFKBID	395.829	-2.4939	0.112966	-22.0765	5.31477e-108	4.36701e-106
SYAP1	618.77	-1.84455	0.0838045	-22.0102	2.30195e-107	1.88219e-105
ILF3	2220.42	-0.90132	0.0409958	-21.9857	3.94694e-107	3.21146e-105
MT-ND5	43597.7	-0.228938	0.0104827	-21.8397	9.7403e-106	7.88681e-104
EIF3A	3644.84	-0.673378	0.0308906	-21.7988	2.38195e-105	1.91937e-103
CD37	3347.16	0.708877	0.03257	21.7647	5.01043e-105	4.01798e-103
XRCC5	3930.68	-0.641355	0.0295314	-21.7177	1.39464e-104	1.11304e-102
SOX4	12939.2	-0.430766	0.019883	-21.665	4.38889e-104	3.48603e-102
SLC25A5	4988.46	0.554246	0.0257346	21.537	7.01176e-103	5.54295e-101
H3F3A	27762.6	0.273668	0.0127182	21.5179	1.0587e-102	8.32975e-101
INKA1	548.798	1.83456	0.0855151	21.453	4.28064e-102	3.35216e-100
HIST1H2BN	474.714	1.99325	0.0929577	21.4426	5.3528e-102	4.17218e-100
BLVRB	1649.42	-1.03446	0.0483151	-21.4107	1.06315e-101	8.24804e-100
LRPPRC	1520	-1.01912	0.0477313	-21.3512	3.7988e-101	2.93352e-99
SUPT16H	1996.02	-0.895054	0.0419676	-21.3273	6.33916e-101	4.87268e-99
PABPC1	18551.5	-0.302421	0.0142149	-21.275	1.93548e-100	1.48091e-98
LPCAT2	2238.29	-0.839949	0.0394858	-21.2722	2.05455e-100	1.56483e-98
ATRX	3413.03	-0.713661	0.033597	-21.2418	3.9246e-100	2.97556e-98
GSTP1	9428.5	0.40564	0.0191559	21.1758	1.59719e-99	1.20548e-97
TENT5A	2218.39	-0.84936	0.0401232	-21.1688	1.8521e-99	1.39158e-97
KMT2C	1458.45	-1.02505	0.0484595	-21.1527	2.60477e-99	1.94832e-97
ARPC1B	1839.68	0.937426	0.0443428	21.1404	3.38009e-99	2.51696e-97
SMARCC1	2322.08	-0.80766	0.0382621	-21.1086	6.62727e-99	4.91302e-97
SRSF10	3456.05	-0.683479	0.0324071	-21.0904	9.73999e-99	7.18863e-97
CRNDE	1491.17	1.03463	0.0491385	21.0555	2.03809e-98	1.49759e-96
SON	4528.12	-0.584834	0.027779	-21.0531	2.14241e-98	1.56734e-96
HMGA1	6605.42	0.496458	0.0236339	21.0062	5.76099e-98	4.19622e-96
ETF1	730.487	-1.54388	0.0735082	-21.0028	6.17931e-98	4.48135e-96
ANKRD36C	1302.75	-1.10479	0.052673	-20.9744	1.12282e-97	8.10764e-96
RPL21	53535.4	0.193246	0.00923319	20.9295	2.8855e-97	2.07458e-95
ADRM1	1112.75	1.17094	0.0559528	20.9273	3.01871e-97	2.16103e-95
RFLNB	1831.82	-0.942377	0.0450864	-20.9016	5.1775e-97	3.69062e-95
IL1B	1919.41	0.87065	0.0417712	20.8433	1.75259e-96	1.24397e-94
NDFIP1	304.952	2.59543	0.12464	20.8235	2.65179e-96	1.87423e-94
ZBTB21	317.935	-2.57599	0.123741	-20.8176	2.99539e-96	2.10815e-94
CANX	2613.25	-0.768329	0.0370622	-20.7308	1.82754e-95	1.28082e-93
EIF3F	5872.11	0.496793	0.0239682	20.7272	1.96969e-95	1.37466e-93
FBL	2477.96	-0.776587	0.0375318	-20.6914	4.13714e-95	2.87531e-93
IGFBP7	3950.44	0.614653	0.0297124	20.6867	4.56063e-95	3.15649e-93
SCAF11	3184.42	-0.685366	0.0331552	-20.6714	6.26274e-95	4.31663e-93
SMARCE1	799.502	-1.44414	0.0698983	-20.6605	7.85041e-95	5.38868e-93
CAPG	1586.79	0.94535	0.0458434	20.6213	1.76749e-94	1.20827e-92
MTRNR2L12	8843.31	-0.435421	0.0211184	-20.6181	1.88995e-94	1.28671e-92
TRIM24	1318.08	-1.14288	0.0554801	-20.5997	2.75904e-94	1.87077e-92
UTRN	1671.32	-0.956959	0.0465736	-20.5472	8.14942e-94	5.50333e-92
GTSF1	587.383	1.62023	0.0789835	20.5136	1.62922e-93	1.09578e-91
NRIP1	1109.12	-1.16563	0.056849	-20.504	1.98489e-93	1.32964e-91
EEF1B2	43496	0.205067	0.0100102	20.4859	2.87912e-93	1.92095e-91
ZFAS1	13226	0.375512	0.0183625	20.4499	6.0192e-93	4.00001e-91
MTRNR2L8	898.936	-1.31865	0.0649396	-20.3058	1.14236e-91	7.56134e-90
AKAP9	2590.51	-0.75001	0.036981	-20.2809	1.89445e-91	1.24899e-89
TNFSF13B	1360.82	1.06769	0.0526662	20.2728	2.23695e-91	1.46899e-89
HLA-DPB1	2172.69	0.792196	0.0392236	20.1969	1.04199e-90	6.81584e-89
RPS25	33346.8	0.238046	0.0117908	20.1892	1.21888e-90	7.94179e-89
TLN1	2255.15	-0.819799	0.0406074	-20.1884	1.23734e-90	8.03064e-89
OSM	406.744	-2.13811	0.106346	-20.1051	6.65522e-90	4.30268e-88
PLP2	1676.19	0.89623	0.0446773	20.0601	1.64755e-89	1.06105e-87
TTC3	2840.59	-0.732213	0.0366185	-19.9957	6.00197e-89	3.85049e-87
RPL22	36297.7	0.215833	0.0107962	19.9915	6.52807e-89	4.17196e-87
TUT4	1702.48	-0.901876	0.0451316	-19.9833	7.70287e-89	4.90396e-87
SPINT2	1656.03	0.898165	0.0450773	19.925	2.47136e-88	1.56738e-86
JOSD1	727.307	-1.50768	0.0756872	-19.9199	2.73765e-88	1.7297e-86
HNRNPAB	2866.3	-0.694146	0.0349312	-19.8718	7.13354e-88	4.49009e-86
MIS18BP1	2936.79	-0.695395	0.0350015	-19.8676	7.76364e-88	4.86833e-86
SYNCRIP	2294.4	-0.804105	0.040522	-19.8437	1.2497e-87	7.8071e-86
ADAR	1572.62	-0.936018	0.0471977	-19.8319	1.58114e-87	9.84082e-86
XXYLT1-AS2	742.002	1.38708	0.0699604	19.8266	1.75367e-87	1.0874e-85
TMSB4X	23103.4	0.28547	0.0144307	19.7821	4.24698e-87	2.6044e-85
SMYD3	1169.76	1.15732	0.0585142	19.7785	4.56239e-87	2.78757e-85
TRGC1	370.164	-2.15458	0.109084	-19.7515	7.78214e-87	4.73745e-85
SORL1	2015.38	-0.875224	0.0443488	-19.735	1.07944e-86	6.54731e-85
EIF4G1	997.384	-1.19777	0.0607918	-19.7027	2.04243e-86	1.23434e-84
PTBP3	1820.51	-0.866911	0.0440315	-19.6884	2.71014e-86	1.62629e-84
ICAM3	3358.06	0.633977	0.0322005	19.6884	2.71048e-86	1.62629e-84
TAX1BP1	1741.7	-0.925951	0.0470771	-19.6688	3.9895e-86	2.38512e-84
SPEN	1308.56	-1.06245	0.0541346	-19.626	9.26698e-86	5.52047e-84
KIT	689.729	-1.42579	0.0727059	-19.6104	1.2596e-85	7.47693e-84
DIAPH2	825.052	-1.29062	0.0658168	-19.6092	1.28975e-85	7.62875e-84
APLP2	1098.51	-1.0967	0.0560043	-19.5825	2.18106e-85	1.28099e-83
ANXA2	311.997	2.40119	0.122858	19.5444	4.60366e-85	2.69435e-83
CITED2	1001.21	1.22114	0.0626097	19.5041	1.01351e-84	5.91098e-83
MXD1	443.414	-1.84007	0.0943583	-19.5009	1.0783e-84	6.26694e-83
KRTCAP2	1187.86	1.05601	0.0542775	19.4557	2.6091e-84	1.5111e-82
MYH9	1900.22	-0.836392	0.0431222	-19.3958	8.36776e-84	4.82956e-82
INPP4B	731.015	-1.34844	0.0698181	-19.3136	4.12477e-83	2.3643e-81
DDX21	2077.06	-0.79951	0.0414243	-19.3005	5.31903e-83	3.03841e-81
ARF5	1054.59	1.13229	0.0586888	19.2931	6.13299e-83	3.49141e-81
SSBP2	1861.82	0.83131	0.0431235	19.2774	8.30906e-83	4.71412e-81
RPL28	72502.8	0.168993	0.00877019	19.269	9.774e-83	5.52645e-81
TM9SF3	1179.84	-1.0602	0.0550344	-19.2642	1.07246e-82	6.04348e-81
COMMD6	7517.17	0.410176	0.0213594	19.2035	3.45748e-82	1.93526e-80
TRPS1	1617.55	0.917349	0.0477945	19.1936	4.18618e-82	2.3353e-80
ACIN1	1193.99	-1.03434	0.0538945	-19.192	4.31977e-82	2.40179e-80
SHOC2	946.288	-1.22121	0.0636468	-19.1873	4.72725e-82	2.61962e-80
SMC3	3005.73	-0.658734	0.0343327	-19.1868	4.77127e-82	2.63526e-80
TRBC1	1080.06	1.12354	0.0586693	19.1504	9.60252e-82	5.28614e-80
FNBP1	2372.41	-0.735857	0.0385114	-19.1075	2.18604e-81	1.19945e-79
HNRNPA1	23898.5	0.243425	0.0127438	19.1015	2.45256e-81	1.34127e-79
ARHGEF6	991.279	-1.13604	0.0595579	-19.0745	4.1136e-81	2.24231e-79
ATXN7L3B	1563.57	-0.908817	0.0476696	-19.0649	4.93975e-81	2.68388e-79
RPL26	66129.8	0.177183	0.00931421	19.0229	1.10206e-80	5.96832e-79
SELENOP	1965.19	-0.805413	0.0425426	-18.9319	6.22854e-80	3.35136e-78
TET2	786.29	-1.27851	0.0675986	-18.9132	8.87416e-80	4.75952e-78
KAT6B	1105.35	-1.06599	0.0564108	-18.8969	1.20948e-79	6.46608e-78
BRCA2	1241.97	-1.05483	0.0558597	-18.8836	1.5565e-79	8.29472e-78
RNF19A	895.707	-1.21188	0.0644035	-18.8169	5.48601e-79	2.91422e-77
PSMB10	713.989	1.34724	0.0719263	18.7308	2.77747e-78	1.47074e-76
BDP1	1331.49	-0.954874	0.0510175	-18.7166	3.62607e-78	1.91401e-76
DHX9	1561.52	-0.881669	0.0471651	-18.6932	5.61845e-78	2.95633e-76
CERS2	1023.85	1.07517	0.0575262	18.69	5.96605e-78	3.1213e-76
ATP5MC2	10581.8	0.337735	0.0180704	18.69	5.9694e-78	3.1213e-76
ANP32E	2109.99	-0.803698	0.0431128	-18.6417	1.47356e-77	7.68092e-76
USP34	1247.38	-0.980345	0.0525977	-18.6386	1.56408e-77	8.12736e-76
LAPTM5	5517.4	0.480719	0.0258359	18.6066	2.83967e-77	1.47099e-75
SUZ12	2054.68	-0.788106	0.0424175	-18.5797	4.68992e-77	2.42192e-75
RANBP2	967.459	-1.11773	0.0601605	-18.5791	4.74789e-77	2.44428e-75
PARP1	3003.2	-0.629834	0.0339328	-18.5612	6.6159e-77	3.39548e-75
SELENOH	3133.21	0.61627	0.0332537	18.5324	1.13172e-76	5.79052e-75
BPTF	3184.56	-0.641087	0.0346384	-18.508	1.78022e-76	9.08076e-75
SMC5	1207.29	-0.990673	0.0535361	-18.5048	1.88951e-76	9.60883e-75
CHD1	1237.88	-1.00795	0.0544828	-18.5003	2.0538e-76	1.04126e-74
CTSW	1166.84	0.994388	0.0538173	18.4771	3.15783e-76	1.59614e-74
RPS14	80201.6	-0.155623	0.00843	-18.4606	4.2834e-76	2.15852e-74
XPO1	1998.07	-0.766539	0.0415484	-18.4493	5.28315e-76	2.65431e-74
FUBP1	1640.9	-0.835068	0.0454513	-18.3728	2.17013e-75	1.08702e-73
NAA15	688.198	-1.31675	0.0719793	-18.2935	9.33027e-75	4.65955e-73
TCEA1	2349.36	-0.688741	0.037749	-18.2453	2.25636e-74	1.12346e-72
CAPRIN1	1737.07	-0.863062	0.0474789	-18.1778	7.73713e-74	3.84093e-72
ATAD2	1546.14	-0.932139	0.051409	-18.1318	1.78665e-73	8.84311e-72
SET	7799.2	-0.38277	0.0211235	-18.1206	2.19294e-73	1.08219e-71
SPECC1	851.344	-1.18658	0.0654876	-18.1192	2.24697e-73	1.10559e-71
WNK1	1519.78	-0.882212	0.048695	-18.1171	2.33671e-73	1.14636e-71
LARS	1668.6	-0.830955	0.0458665	-18.1168	2.34751e-73	1.14828e-71
AC025171.3	612.948	1.3827	0.0765949	18.0521	7.58927e-73	3.70143e-71
MAZ	2522.31	0.661926	0.0367269	18.0229	1.28733e-72	6.26027e-71
HSPA1A	735.864	1.25069	0.06942	18.0162	1.45276e-72	7.04418e-71
ZNF711	439.672	-1.70012	0.0943956	-18.0106	1.60806e-72	7.7746e-71
DDX17	6065.51	-0.437337	0.0242963	-18.0001	1.94324e-72	9.36799e-71
BAHCC1	1031.07	-1.03839	0.0578215	-17.9585	4.11976e-72	1.98033e-70
CCDC88A	3018.43	-0.603852	0.0336632	-17.9381	5.95066e-72	2.85221e-70
SLC38A1	1646.97	-0.821698	0.04582	-17.9332	6.49537e-72	3.10438e-70
BACH1	682.657	-1.28991	0.072052	-17.9025	1.12699e-71	5.37092e-70
S100A11	700.487	1.31336	0.0733851	17.8968	1.24888e-71	5.93484e-70
ATF3	531.79	-3.59086	0.200665	-17.8948	1.29394e-71	6.1315e-70
RPL13A	70676.3	-0.149295	0.00834935	-17.8811	1.65608e-71	7.82531e-70
ELF1	2789.85	-0.658463	0.0369158	-17.8369	3.65551e-71	1.71275e-69
GYPC	2458.9	-0.733091	0.0411603	-17.8106	5.84326e-71	2.73013e-69
CEP350	1318.81	-0.922037	0.0517806	-17.8066	6.27821e-71	2.92516e-69
EMB	1568.04	-0.851418	0.0479112	-17.7707	1.19095e-70	5.53343e-69
MCM4	1521.15	-0.849423	0.0479397	-17.7186	3.01434e-70	1.39665e-68
SDE2	466.586	-1.64347	0.0928166	-17.7066	3.7289e-70	1.72294e-68
C6orf48	4802.79	0.474296	0.0268324	17.6762	6.39532e-70	2.94679e-68
RIF1	1752.98	-0.849629	0.0481334	-17.6515	9.90329e-70	4.5506e-68
MSH6	1284.15	-0.960723	0.0545795	-17.6023	2.36673e-69	1.08453e-67
PPIA	8980.23	0.355107	0.0201804	17.5967	2.61329e-69	1.19424e-67
KTN1	2705.96	-0.629279	0.0358279	-17.5639	4.65253e-69	2.11456e-67
STK26	1436.9	-0.849353	0.0483724	-17.5586	5.11114e-69	2.31668e-67
PFN1	6681.84	0.409803	0.0233412	17.5571	5.25027e-69	2.37329e-67
ATAD5	1116.09	-0.977203	0.0556741	-17.5522	5.72321e-69	2.58009e-67
ATP6V0E1	2507.97	0.637152	0.0363679	17.5197	1.01445e-68	4.54867e-67
GNAQ	1871.51	-0.735219	0.041989	-17.5098	1.20643e-68	5.39498e-67
FECH	484.992	-1.53659	0.0877602	-17.5089	1.22517e-68	5.46411e-67
ACTR2	3943.63	-0.526715	0.0300958	-17.5013	1.40062e-68	6.22996e-67
SUMO2	7333.44	0.376385	0.0215346	17.4781	2.1032e-68	9.33016e-67
C1QTNF4	4073.35	0.538839	0.0308604	17.4605	2.86278e-68	1.26661e-66
RPL13	151890	0.119431	0.0068435	17.4517	3.3422e-68	1.47481e-66
SETX	887.305	-1.09062	0.0626432	-17.4101	6.91766e-68	3.03649e-66
FAM210B	325.998	-1.94274	0.111742	-17.3859	1.05471e-67	4.61748e-66
PAXBP1	874.652	-1.1134	0.0640524	-17.3826	1.11816e-67	4.88242e-66
C3orf80	476.709	1.51195	0.0871015	17.3585	1.70133e-67	7.39016e-66
SMC1A	2273.65	-0.767706	0.0442809	-17.3372	2.46439e-67	1.06769e-65
CBX5	2083.51	-0.707631	0.0408437	-17.3253	3.02894e-67	1.3055e-65
PJA2	1387.92	-0.889332	0.051484	-17.274	7.38939e-67	3.16851e-65
ANGPT1	3780.04	0.506134	0.0293858	17.2238	1.76074e-66	7.51128e-65
NORAD	1571.38	-0.863665	0.0501511	-17.2213	1.83951e-66	7.82728e-65
SNRNP200	1653.91	-0.813236	0.0472586	-17.2082	2.30541e-66	9.7848e-65
SNCA	596.821	-1.37345	0.0800563	-17.156	5.6694e-66	2.40014e-64
OPA1	710.622	-1.25405	0.0731544	-17.1425	7.15491e-66	3.02137e-64
KLF10	930.086	-1.09732	0.0640869	-17.1223	1.01142e-65	4.26023e-64
TMEM59	2635.21	0.637903	0.0373539	17.0773	2.19179e-65	9.20882e-64
PSME4	682.87	-1.28261	0.0751177	-17.0746	2.29257e-65	9.60804e-64
WDR82	1046.62	-0.994768	0.0582765	-17.0698	2.49087e-65	1.0413e-63
TXNIP	6476.21	-0.397655	0.0233059	-17.0624	2.82633e-65	1.17858e-63
CFL1	8537.65	0.352686	0.0206743	17.0592	2.98857e-65	1.24313e-63
RPS16	38126.9	0.177063	0.010385	17.0498	3.50808e-65	1.45559e-63
BLOC1S6	1222.62	-0.916722	0.0537866	-17.0437	3.89483e-65	1.61205e-63
SERBP1	5919.74	-0.407776	0.0239679	-17.0134	6.53359e-65	2.69753e-63
SLK	827.602	-1.11348	0.0655797	-16.979	1.17505e-64	4.82754e-63
CYBA	9143.21	0.333426	0.0196387	16.978	1.19433e-64	4.89468e-63
NSD3	2143.42	-0.674894	0.0398507	-16.9356	2.45983e-64	1.00563e-62
USP7	886.161	-1.09645	0.0647649	-16.9296	2.72102e-64	1.1097e-62
ACSM3	301.643	-1.95481	0.115513	-16.9229	3.05207e-64	1.24167e-62
PCNT	568.653	-1.41393	0.0835636	-16.9204	3.1815e-64	1.29118e-62
NRDC	1173.08	-0.917429	0.0542323	-16.9166	3.39218e-64	1.37334e-62
OGA	1364.21	-0.851696	0.0504355	-16.8868	5.62439e-64	2.27155e-62
PPP1R15A	2191.09	-0.686228	0.0407075	-16.8575	9.23858e-64	3.72221e-62
XRN1	937.1	-1.03889	0.0616577	-16.8493	1.06169e-63	4.26721e-62
SF3A2	890.869	1.07819	0.0640036	16.8458	1.1263e-63	4.51604e-62
SDHD	930.634	1.02437	0.0608094	16.8456	1.13039e-63	4.52157e-62
KLF13	988.969	-1.00534	0.059726	-16.8326	1.40882e-63	5.62181e-62
RASGRP3	934.741	-1.1392	0.0677231	-16.8214	1.69977e-63	6.76664e-62
TXN	4575.08	0.466416	0.0277304	16.8197	1.75065e-63	6.95258e-62
MZB1	2896.45	0.605977	0.0360425	16.8129	1.96482e-63	7.78462e-62
TGOLN2	1991.56	-0.693154	0.0412647	-16.7977	2.53486e-63	1.00193e-61
N4BP2	1213.03	-0.934707	0.0560284	-16.6827	1.75007e-62	6.90097e-61
CNTRL	2342.5	-0.636998	0.0382081	-16.6718	2.10121e-62	8.26608e-61
HSP90B1	2761.09	-0.604957	0.0363209	-16.6559	2.74236e-62	1.0763e-60
PRPF8	1822.56	-0.717183	0.0430601	-16.6554	2.76554e-62	1.08284e-60
CLTC	1326.99	-0.844437	0.050768	-16.6333	4.00177e-62	1.55957e-60
SRSF5	10575.8	-0.307206	0.0185029	-16.6031	6.61803e-62	2.57317e-60
UHRF1BP1L	383.526	-1.65004	0.0995222	-16.5796	9.78283e-62	3.79483e-60
RAC2	3630.13	0.504883	0.0304567	16.5771	1.0204e-61	3.94902e-60
IQGAP1	1501.57	-0.816092	0.0492433	-16.5726	1.09875e-61	4.24241e-60
UBA52	27568.2	0.206707	0.0125091	16.5245	2.4427e-61	9.40976e-60
EIF3H	6635.1	0.372376	0.0225555	16.5094	3.14183e-61	1.2075e-59
GLUL	3485.77	-0.542603	0.0328682	-16.5084	3.18991e-61	1.22317e-59
PDS5A	1258.55	-0.860746	0.0521529	-16.5043	3.41761e-61	1.30747e-59
DENND3	928.01	-1.00426	0.0608972	-16.4911	4.25178e-61	1.62288e-59
ATP11B	544.607	-1.37378	0.083343	-16.4835	4.82048e-61	1.83574e-59
ABRACL	2438.36	0.615587	0.037352	16.4807	5.05107e-61	1.91918e-59
EIF5B	2127.5	-0.661653	0.0401493	-16.4798	5.12584e-61	1.94316e-59
PDS5B	1504.32	-0.816518	0.0495908	-16.4651	6.53413e-61	2.47141e-59
SH3BGRL3	7237.45	0.359471	0.0218729	16.4345	1.08333e-60	4.08824e-59
CLIC1	6731.84	0.371811	0.022672	16.3996	1.92603e-60	7.25198e-59
FAM53C	542.941	-1.38443	0.0844204	-16.3992	1.93687e-60	7.27635e-59
G3BP2	1362.42	-0.815276	0.0497231	-16.3963	2.03193e-60	7.61633e-59
NCOA4	1782.25	-0.737981	0.0450762	-16.3718	3.03889e-60	1.13652e-58
GNB4	1099.76	-0.954071	0.0583512	-16.3505	4.31419e-60	1.60986e-58
TP53BP2	429.712	-1.51482	0.0927149	-16.3385	5.25363e-60	1.95604e-58
MT-ND4	162334	0.109507	0.00670485	16.3324	5.80158e-60	2.15524e-58
PTPN11	723.825	-1.18422	0.072512	-16.3313	5.90793e-60	2.18987e-58
CSGALNACT2	522.613	-1.376	0.0843317	-16.3165	7.52739e-60	2.78397e-58
HLA-DPA1	1911.1	0.758333	0.0465693	16.284	1.2828e-59	4.72341e-58
SOS2	668.202	-1.18536	0.072811	-16.2799	1.37084e-59	5.03647e-58
DOCK2	1359.9	-0.833956	0.0515987	-16.1623	9.29755e-59	3.40094e-57
HUWE1	1114.35	-0.92945	0.057519	-16.159	9.81454e-59	3.5822e-57
DYNC1H1	1712.7	-0.78951	0.0488683	-16.1559	1.03269e-58	3.76097e-57
ZBTB16	1741.37	-0.717104	0.04448	-16.1219	1.78878e-58	6.50039e-57
TRAK2	304.107	-1.94584	0.120897	-16.095	2.76363e-58	1.00212e-56
ROCK1	2566.42	-0.619568	0.0385388	-16.0765	3.73005e-58	1.34962e-56
NASP	5264.12	-0.444231	0.0276702	-16.0545	5.31907e-58	1.91624e-56
TAF1D	3409.79	-0.516895	0.0322299	-16.0377	6.96418e-58	2.49812e-56
UBR5	896.814	-0.997365	0.0622344	-16.0259	8.42033e-58	3.01397e-56
RPL38	19090.8	0.228058	0.0142386	16.0169	9.73801e-58	3.47816e-56
HNRNPA2B1	12972.5	-0.30548	0.0191108	-15.9847	1.63428e-57	5.81234e-56
QKI	1407.92	-0.787706	0.0493365	-15.966	2.20541e-57	7.82686e-56
CFD	1011.52	-0.985858	0.0617946	-15.9538	2.68051e-57	9.49276e-56
TBC1D1	882.241	-1.01507	0.0636841	-15.9392	3.38829e-57	1.19739e-55
TALDO1	6649.38	0.381226	0.0239207	15.937	3.5063e-57	1.23647e-55
VPS37B	731.533	-1.14311	0.0717363	-15.9349	3.62737e-57	1.27647e-55
KAT6A	964.105	-0.963104	0.0605425	-15.9079	5.5862e-57	1.96164e-55
HNRNPH1	4457.08	-0.453803	0.0285393	-15.901	6.23864e-57	2.18614e-55
ZNF451	794.676	-1.06532	0.067003	-15.8996	6.37291e-57	2.22851e-55
EIF4G2	3007.49	-0.543323	0.0342515	-15.8628	1.14727e-56	3.98675e-55
HIPK3	776.584	-1.08837	0.0686903	-15.8446	1.53285e-56	5.31558e-55
RPL31	18893.4	-0.222271	0.0140621	-15.8064	2.81022e-56	9.72501e-55
GLS	1497.99	-0.762095	0.0482488	-15.7951	3.36235e-56	1.16116e-54
SLC25A6	11968.7	0.270893	0.0171546	15.7913	3.5718e-56	1.23094e-54
AFF1	1151.51	-0.849553	0.0538375	-15.7799	4.27578e-56	1.47051e-54
ARFGEF1	813.348	-1.0542	0.0668422	-15.7715	4.88494e-56	1.67656e-54
PPDPF	1694.23	-0.71784	0.0455174	-15.7707	4.95102e-56	1.69575e-54
TMEM131	645.16	-1.17237	0.0743764	-15.7627	5.62076e-56	1.92119e-54
ZNF267	522.567	-1.31978	0.0837311	-15.7622	5.66634e-56	1.93281e-54
RPS18	133797	0.115407	0.00732411	15.7571	6.13638e-56	2.08887e-54
MBNL1	4114.53	-0.457623	0.0290616	-15.7466	7.2439e-56	2.46086e-54
SKIL	358.451	-1.61114	0.102594	-15.7041	1.41861e-55	4.80942e-54
FUOM	326.751	-1.68307	0.107232	-15.6957	1.61973e-55	5.48014e-54
AHNAK	1203.23	-0.858992	0.0547326	-15.6943	1.65364e-55	5.58354e-54
CENPU	969.449	-1.03818	0.066176	-15.6882	1.82234e-55	6.14073e-54
MTPN	2669.58	-0.585175	0.0373719	-15.6582	2.92226e-55	9.82728e-54
KIF2A	1188.85	-0.82486	0.0527596	-15.6343	4.25017e-55	1.42642e-53
PPP4R3A	1125.91	-0.85175	0.0544876	-15.632	4.40787e-55	1.47637e-53
TRIM44	989.299	-0.919182	0.0588249	-15.6257	4.86381e-55	1.62582e-53
TOPBP1	1048.67	-0.910468	0.0582864	-15.6206	5.2724e-55	1.75887e-53
RUNX1	2584.34	-0.559795	0.0358503	-15.6148	5.77461e-55	1.92256e-53
SPTAN1	736.33	-1.06479	0.0684054	-15.5659	1.2408e-54	4.1228e-53
GPR183	336.225	-1.65184	0.106292	-15.5406	1.84315e-54	6.11206e-53
TXNRD1	1233.47	-0.881865	0.0567822	-15.5307	2.15147e-54	7.12036e-53
MDN1	715.003	-1.08034	0.0695827	-15.526	2.3142e-54	7.62861e-53
FKBP1A	2075	0.648319	0.0417567	15.5261	2.30989e-54	7.62861e-53
HBB	277979	-2.69797	0.174176	-15.4899	4.05611e-54	1.33181e-52
ATP5MC3	3358.83	0.48471	0.0313322	15.47	5.52961e-54	1.81206e-52
ALAS2	973.741	-2.28707	0.147915	-15.4621	6.24983e-54	2.04406e-52
MAP4	684.128	-1.1223	0.0727447	-15.428	1.06152e-53	3.4515e-52
MYCBP2	2752.62	-0.546116	0.0354938	-15.3862	2.02511e-53	6.57175e-52
SYPL1	2100.61	0.621801	0.0404749	15.3626	2.91528e-53	9.4421e-52
MTMR6	342.678	-1.59423	0.103794	-15.3595	3.05694e-53	9.88174e-52
CENPC	1285.54	-0.81387	0.0530029	-15.3552	3.26983e-53	1.05495e-51
TAF15	1365.45	-0.781176	0.0509642	-15.3279	4.97462e-53	1.60186e-51
ZNF91	896.207	-0.95118	0.062162	-15.3016	7.4574e-53	2.39671e-51
IMP3	940.212	0.908788	0.0594131	15.2961	8.12165e-53	2.60518e-51
FRYL	1183.87	-0.865653	0.0566075	-15.2922	8.61896e-53	2.75939e-51
CCNL1	4102.66	-0.458331	0.0300474	-15.2536	1.55738e-52	4.97644e-51
USP48	1149.55	-0.840663	0.0551343	-15.2475	1.70941e-52	5.45181e-51
NONO	2438.47	-0.56481	0.0371491	-15.2039	3.33328e-52	1.05903e-50
ZNF43	816.449	-1.01596	0.0669598	-15.1728	5.35756e-52	1.69894e-50
LAT2	1198.04	0.82385	0.0543799	15.1499	7.58764e-52	2.40155e-50
CTDSPL2	913.289	-0.966254	0.0639057	-15.12	1.19577e-51	3.77754e-50
PDE3B	372.51	-1.65345	0.109384	-15.1159	1.27159e-51	4.00949e-50
PTGER4	711.823	-1.07982	0.0715563	-15.0906	1.8687e-51	5.88111e-50
SLC25A3	6457.14	0.344595	0.0228384	15.0884	1.92994e-51	6.0624e-50
PHB2	2714.53	0.53698	0.0356427	15.0656	2.72587e-51	8.54654e-50
MTDH	4006.92	-0.451062	0.0299424	-15.0643	2.77927e-51	8.69759e-50
DCTN4	438.525	-1.4168	0.0941123	-15.0543	3.23349e-51	1.01001e-49
NEAT1	9806.59	-0.592329	0.0393568	-15.0502	3.4407e-51	1.07273e-49
HNRNPR	3950.55	-0.452984	0.0301006	-15.049	3.50544e-51	1.09087e-49
CSDE1	3244.07	-0.480659	0.0319691	-15.0351	4.32256e-51	1.34265e-49
IL18	2009.17	0.621195	0.0413322	15.0293	4.71626e-51	1.46222e-49
EIF2AK2	1344.14	-0.795524	0.0529758	-15.0168	5.70307e-51	1.76488e-49
BTG2	1204.81	-0.866101	0.0578011	-14.9842	9.32054e-51	2.87901e-49
TMBIM4	2075.56	0.598948	0.040078	14.9446	1.68973e-50	5.20974e-49
RB1CC1	1508.12	-0.73046	0.0489456	-14.9239	2.30373e-50	7.08972e-49
HLA-DRB1	2124.79	0.620585	0.0416165	14.912	2.75339e-50	8.45792e-49
HDGF	2259.32	-0.602306	0.0404632	-14.8853	4.10762e-50	1.25947e-48
UBE2H	480.121	-1.34741	0.0906887	-14.8576	6.21324e-50	1.90159e-48
EIF5	2063.14	-0.618455	0.04176	-14.8097	1.26743e-49	3.86484e-48
HIPK1	776.67	-1.04351	0.0704887	-14.804	1.38043e-49	4.20175e-48
ATP5PO	3336.73	0.482859	0.0326907	14.7705	2.2693e-49	6.89469e-48
PARP4	937.381	-0.913305	0.0618527	-14.7658	2.43354e-49	7.38025e-48
SRSF7	4466.93	0.413397	0.028008	14.76	2.65407e-49	8.03448e-48
GLRX	601.216	1.14397	0.0775321	14.7547	2.86756e-49	8.66502e-48
MIR181A1HG	1305.08	-0.753057	0.0510666	-14.7466	3.23712e-49	9.76403e-48
EIF3M	3779.99	0.482195	0.0327321	14.7316	4.04311e-49	1.21731e-47
ORAI3	1755.68	0.64962	0.0441062	14.7285	4.22791e-49	1.27066e-47
IRAK3	1264.27	-0.752251	0.0511095	-14.7184	4.90997e-49	1.47299e-47
CREBBP	791.008	-0.961414	0.0653506	-14.7116	5.42735e-49	1.62237e-47
ATP5MG	8652.36	0.303183	0.0206155	14.7065	5.85528e-49	1.74716e-47
RNF10	844.747	-0.936581	0.0637438	-14.6929	7.15829e-49	2.13215e-47
PTP4A1	755.786	-1.02109	0.069558	-14.6796	8.70596e-49	2.58851e-47
ZMYM4	732.871	-1.0054	0.0686066	-14.6546	1.25986e-48	3.73924e-47
COPA	1010.5	-0.893886	0.0610623	-14.6389	1.58558e-48	4.6976e-47
HERC5	396.157	-1.42726	0.0976386	-14.6177	2.16468e-48	6.40193e-47
USP1	1418.76	-0.760923	0.0520611	-14.616	2.2216e-48	6.55863e-47
PDCD4	1401.22	-0.737903	0.0505455	-14.5988	2.8593e-48	8.42633e-47
ARL6IP5	3570.37	0.449195	0.030795	14.5866	3.41733e-48	1.00531e-46
MDH1	1486.39	0.693029	0.0475134	14.586	3.44966e-48	1.01303e-46
HSD17B11	3567.78	0.478967	0.0328542	14.5786	3.84593e-48	1.12742e-46
KDM1A	866.641	-0.929496	0.0637846	-14.5724	4.20735e-48	1.2312e-46
RPL12	50628.8	0.138409	0.00950752	14.5578	5.20788e-48	1.51866e-46
ITM2A	2723.36	0.505362	0.0347265	14.5526	5.61931e-48	1.63578e-46
HNRNPM	3354.82	-0.465077	0.0319773	-14.544	6.37718e-48	1.85316e-46
DYRK1A	1212.58	-0.771055	0.053101	-14.5205	8.98186e-48	2.60552e-46
FAM129A	1437.9	-0.785371	0.0541069	-14.5152	9.70943e-48	2.81169e-46
PDE4D	330.097	-1.56059	0.107601	-14.5034	1.15298e-47	3.33306e-46
ASF1A	513.693	1.1881	0.0819819	14.4923	1.35597e-47	3.91309e-46
SMAP2	643.099	-1.0774	0.0744229	-14.4767	1.69999e-47	4.89737e-46
SMARCC2	954.943	-0.855649	0.0591355	-14.4693	1.89426e-47	5.43825e-46
TROVE2	982.28	-0.851969	0.058969	-14.4478	2.59e-47	7.39746e-46
RAB11FIP1	521.311	-1.19483	0.082893	-14.4141	4.21626e-47	1.20218e-45
SREK1	2110.45	-0.599805	0.0416272	-14.409	4.54427e-47	1.29349e-45
HTATIP2	525.909	1.15016	0.0799932	14.3783	7.084e-47	2.01297e-45
UBE3A	1494.47	-0.696025	0.0484179	-14.3753	7.38987e-47	2.09631e-45
NDUFB3	862.2	0.902911	0.0628861	14.3579	9.50916e-47	2.69292e-45
CDC42	3533.5	-0.444034	0.0309346	-14.3539	1.00648e-46	2.84544e-45
ARL8B	856.394	-0.933484	0.0650355	-14.3535	1.01338e-46	2.86008e-45
DDOST	1533.5	0.683141	0.0476116	14.3482	1.09356e-46	3.08118e-45
CTSA	1708.91	0.63193	0.0440457	14.3471	1.11017e-46	3.1227e-45
MARCH7	1566.72	-0.672595	0.0469171	-14.3358	1.30707e-46	3.67037e-45
LCOR	1118.4	-0.79871	0.0557267	-14.3326	1.36846e-46	3.8363e-45
USP24	569.866	-1.12133	0.0782487	-14.3303	1.41539e-46	3.9612e-45
PKN2	1020.2	-0.82919	0.0578676	-14.3291	1.43971e-46	4.0225e-45
RPL34	75996.4	0.129856	0.0090641	14.3264	1.49576e-46	4.17213e-45
IKZF1	2689.32	-0.502867	0.0351166	-14.3199	1.64305e-46	4.57532e-45
TCF25	1717.39	-0.632714	0.0442138	-14.3103	1.8863e-46	5.24392e-45
BRD4	1659.76	-0.665786	0.0465292	-14.309	1.92233e-46	5.33517e-45
HIST1H2BG	323.958	1.60589	0.112281	14.3024	2.11245e-46	5.85309e-45
LAMTOR1	2653.82	0.503139	0.0351922	14.2969	2.28818e-46	6.3295e-45
MAP3K1	607.853	-1.14815	0.0803712	-14.2856	2.68946e-46	7.42719e-45
MDFI	350.496	1.44071	0.100897	14.279	2.95685e-46	8.1521e-45
DHX36	2040.45	-0.577566	0.0404539	-14.2771	3.039e-46	8.35099e-45
CCDC171	840.292	-0.898825	0.0629643	-14.2752	3.12608e-46	8.57616e-45
UBTF	1516	-0.676289	0.0474614	-14.2492	4.53138e-46	1.24111e-44
S100A4	2625.31	0.532326	0.0373701	14.2447	4.83694e-46	1.32263e-44
STK17A	558.322	-1.20638	0.0847514	-14.2344	5.60521e-46	1.5302e-44
NUMA1	1173.88	-0.78519	0.0551838	-14.2286	6.08602e-46	1.65874e-44
HDLBP	1056.98	-0.835219	0.0588726	-14.1869	1.10441e-45	3.00514e-44
AIF1	10817.3	0.27592	0.0194496	14.1864	1.11197e-45	3.02079e-44
UHRF2	732.591	-0.966333	0.0682052	-14.168	1.44497e-45	3.91904e-44
AZU1	7927.81	-1.03731	0.0733297	-14.1459	1.98019e-45	5.35325e-44
ZFC3H1	867.489	-0.909566	0.0643361	-14.1377	2.22336e-45	6.00091e-44
OSTC	2354.3	0.56876	0.040249	14.131	2.44581e-45	6.59064e-44
C14orf119	537.734	1.1261	0.0797285	14.1241	2.69754e-45	7.25726e-44
TP53BP1	600.1	-1.07865	0.076373	-14.1235	2.72323e-45	7.31457e-44
TBCC	435.59	1.27207	0.0903949	14.0723	5.61953e-45	1.50455e-43
ANKRD11	2625.83	-0.521256	0.0371973	-14.0133	1.29305e-44	3.45641e-43
TMF1	1253.12	-0.728394	0.0519956	-14.0088	1.37806e-44	3.67778e-43
RNF169	587.78	-1.08234	0.0772777	-14.0059	1.43534e-44	3.82453e-43
BST2	2423.77	0.520242	0.0371736	13.9949	1.67385e-44	4.45291e-43
GNAS	10423	0.261809	0.0187079	13.9945	1.68294e-44	4.46996e-43
ATF7IP	1353.29	-0.727079	0.0519674	-13.9911	1.76735e-44	4.68671e-43
PNN	6592.74	-0.339375	0.0242613	-13.9883	1.8369e-44	4.8634e-43
HLA-F	457.298	1.22629	0.0876938	13.9838	1.95758e-44	5.17472e-43
CERS6	982.288	-0.824719	0.0589997	-13.9784	2.11269e-44	5.5759e-43
USP12	498.472	-1.19649	0.0856346	-13.972	2.3101e-44	6.08727e-43
GSN	1024.32	0.80364	0.0575405	13.9665	2.49562e-44	6.56575e-43
AFG3L2	687.337	-1.00198	0.0717535	-13.9641	2.57967e-44	6.77622e-43
SEPT7	3644.4	-0.423632	0.0304066	-13.9322	4.03652e-44	1.05863e-42
FOS	4866.08	0.402523	0.0289072	13.9247	4.48488e-44	1.17254e-42
SRRM1	3472.12	-0.453771	0.0326084	-13.9158	5.08171e-44	1.32649e-42
TMOD3	1054.3	-0.809678	0.0582442	-13.9014	6.2072e-44	1.61775e-42
HSPA5	1832.05	-0.608905	0.0438942	-13.8721	9.3501e-44	2.43307e-42
MPG	1898.9	0.617091	0.0446468	13.8216	1.88812e-43	4.90559e-42
HMGN3	1694.64	0.620829	0.0449275	13.8185	1.9722e-43	5.11605e-42
RBBP4	2084.89	-0.556205	0.0402586	-13.8158	2.04701e-43	5.30189e-42
SUCO	494.582	-1.1562	0.0837147	-13.8112	2.18181e-43	5.64226e-42
PTPRC	2133.1	-0.570401	0.0413023	-13.8104	2.2061e-43	5.69624e-42
BNIP3L	1949.68	-0.599786	0.0434324	-13.8097	2.22886e-43	5.74612e-42
CEP95	774.317	-0.945943	0.0685281	-13.8037	2.42046e-43	6.23045e-42
DNTTIP2	1246.83	-0.736283	0.0533801	-13.7932	2.80027e-43	7.197e-42
YTHDC1	1622.23	-0.645333	0.0468084	-13.7867	3.06505e-43	7.86538e-42
SH3GLB1	1200.74	-0.734217	0.0532725	-13.7823	3.25785e-43	8.34729e-42
CD164	4954.38	0.373298	0.0271123	13.7686	3.93749e-43	1.00732e-41
MXI1	423.973	-1.33039	0.0966415	-13.7662	4.06933e-43	1.03946e-41
CSNK1G3	460.418	-1.22097	0.0887462	-13.7581	4.55617e-43	1.16203e-41
HECA	319.059	-1.50382	0.109311	-13.7573	4.60672e-43	1.17313e-41
UBR4	697.915	-0.971118	0.0706075	-13.7538	4.8356e-43	1.22767e-41
PRR14L	460.665	-1.20335	0.0875307	-13.7478	5.25193e-43	1.33134e-41
DMXL1	458.724	-1.20332	0.08769	-13.7224	7.45437e-43	1.88678e-41
RPL36A	3940.85	-0.400024	0.0291657	-13.7156	8.19281e-43	2.07055e-41
U2SURP	2499.65	-0.510424	0.0372285	-13.7106	8.77574e-43	2.21451e-41
AC020916.1	405.89	-1.36511	0.0995696	-13.7102	8.8266e-43	2.22398e-41
CD2AP	805.5	-0.925042	0.0675234	-13.6996	1.02135e-42	2.56955e-41
KRCC1	591.286	1.049	0.0765762	13.6988	1.03274e-42	2.59429e-41
ITPR1	661.752	-1.00325	0.0732868	-13.6894	1.17463e-42	2.9463e-41
SLTM	2225.19	-0.539011	0.0393971	-13.6815	1.30967e-42	3.28006e-41
ATP5F1B	3978.35	0.4023	0.0294197	13.6745	1.44127e-42	3.60427e-41
NUP98	605.128	-1.0407	0.0761101	-13.6737	1.45866e-42	3.64229e-41
KIF11	598.968	-1.09707	0.0802495	-13.6707	1.51943e-42	3.78835e-41
PAFAH1B1	1125.17	-0.74803	0.054744	-13.6642	1.66233e-42	4.13847e-41
BIN1	724.693	0.940147	0.0688816	13.6487	2.0538e-42	5.10542e-41
SEPT2	1503.8	-0.642583	0.0471108	-13.6398	2.32152e-42	5.76236e-41
SRP9	2648.24	0.476615	0.0349593	13.6334	2.53375e-42	6.27979e-41
MARCH8	439.83	-1.23063	0.0902756	-13.6319	2.58704e-42	6.40236e-41
CD81	402.955	-1.28617	0.0944156	-13.6224	2.94647e-42	7.28104e-41
SFT2D1	549.904	1.07321	0.079095	13.5686	6.14906e-42	1.51725e-40
ETV6	3306.28	0.46087	0.0339735	13.5656	6.40693e-42	1.57855e-40
RLIM	459.001	-1.19826	0.0883791	-13.5582	7.08761e-42	1.74368e-40
DNMT1	2341.83	-0.54453	0.0401664	-13.5569	7.21502e-42	1.77241e-40
SINHCAF	2075.23	-0.565677	0.0417661	-13.5439	8.60637e-42	2.11109e-40
ARID2	903.468	-0.849983	0.0628982	-13.5136	1.29966e-41	3.18331e-40
HELLS	2238.59	-0.600338	0.04443	-13.512	1.3285e-41	3.24918e-40
AF064858.1	2110.79	0.555038	0.0410901	13.5078	1.40582e-41	3.43325e-40
CCNT1	591.396	-1.06038	0.0785183	-13.5049	1.46225e-41	3.56583e-40
EPC2	461.633	-1.17197	0.0869051	-13.4856	1.90026e-41	4.62045e-40
RALGPS2	539.19	-1.13354	0.0840969	-13.4789	2.08095e-41	5.05245e-40
ARHGAP11A	652.516	-0.984297	0.0731069	-13.4638	2.55411e-41	6.19223e-40
PLEK	2375.53	-0.518028	0.0384847	-13.4606	2.66584e-41	6.45374e-40
DDX6	1791.3	-0.585776	0.0436107	-13.4319	3.93081e-41	9.48855e-40
ESD	2656.96	0.493755	0.0367638	13.4305	4.00917e-41	9.66372e-40
FAM208B	662.197	-0.966045	0.0719349	-13.4294	4.0646e-41	9.78319e-40
WAPL	1163.79	-0.730308	0.0543889	-13.4275	4.1712e-41	1.00253e-39
GCLC	477.656	-1.1941	0.0889526	-13.424	4.37247e-41	1.04939e-39
BCOR	436.393	-1.23618	0.0921354	-13.417	4.80515e-41	1.14993e-39
GLRX5	1941.92	-0.611821	0.0456083	-13.4147	4.95998e-41	1.18528e-39
EWSR1	1821.24	-0.579435	0.0432411	-13.4001	6.03834e-41	1.44091e-39
KAT7	591.574	-1.04264	0.0778502	-13.3929	6.65092e-41	1.58482e-39
BAZ2A	938.017	-0.79742	0.0595653	-13.3873	7.17169e-41	1.70647e-39
BANF1	2209.27	0.520094	0.0388617	13.3832	7.58103e-41	1.8013e-39
RNF125	920.816	-0.833175	0.0622856	-13.3767	8.27601e-41	1.96364e-39
ZNF106	748.22	-0.945177	0.0706829	-13.3721	8.80463e-41	2.0861e-39
HTT	554.627	-1.13307	0.0847913	-13.3631	9.93911e-41	2.35155e-39
TPP2	1184.13	-0.731066	0.0548201	-13.3357	1.4341e-40	3.38343e-39
RPS20	30227.6	-0.150951	0.0113223	-13.3322	1.5033e-40	3.54168e-39
NPIPB5	646.872	-0.979083	0.0734856	-13.3235	1.69075e-40	3.97769e-39
NPM1	17586.3	-0.190037	0.0142697	-13.3175	1.83074e-40	4.30096e-39
FAU	33286.1	0.153442	0.0115221	13.3173	1.83705e-40	4.3097e-39
NDUFA4	4513.18	0.369454	0.0277809	13.2989	2.34997e-40	5.50526e-39
FNBP4	1477.99	-0.682921	0.0513654	-13.2954	2.46302e-40	5.76202e-39
LNPEP	1459.41	-0.684009	0.0514917	-13.2839	2.87105e-40	6.70717e-39
C1orf43	1101.31	0.742987	0.0560606	13.2533	4.31959e-40	1.0063e-38
CLINT1	2066.83	-0.590694	0.0446394	-13.2326	5.69032e-40	1.32193e-38
BAZ1B	1329.39	-0.683151	0.0516419	-13.2286	5.99788e-40	1.39144e-38
LRRFIP1	5383.37	-0.331589	0.0250699	-13.2266	6.16386e-40	1.42796e-38
SERINC1	767.858	-0.87979	0.0665596	-13.2181	6.9013e-40	1.59658e-38
TRA2B	3517.88	-0.412359	0.0312331	-13.2026	8.47091e-40	1.95699e-38
CD55	678.41	-0.93038	0.0705526	-13.187	1.04184e-39	2.40357e-38
KCTD20	711.179	-0.944139	0.0716113	-13.1842	1.08154e-39	2.49173e-38
DNAJA1	2690.77	0.466363	0.0354198	13.1667	1.36416e-39	3.13851e-38
LAMP2	1870.88	-0.554534	0.0421362	-13.1605	1.48067e-39	3.40186e-38
EEF2	15125.6	0.201494	0.0153496	13.127	2.30622e-39	5.2913e-38
ZNF33A	970.907	-0.786438	0.0599175	-13.1253	2.3574e-39	5.40129e-38
CPVL	498.025	-1.0961	0.0835195	-13.1239	2.40364e-39	5.49969e-38
YES1	320.529	-1.42911	0.10899	-13.1124	2.79715e-39	6.39129e-38
NKTR	3354.38	-0.412211	0.0314541	-13.1051	3.07714e-39	7.02144e-38
ZNRF1	1396.13	0.655755	0.0500475	13.1027	3.17926e-39	7.24454e-38
KIAA1109	612.506	-0.973502	0.0743149	-13.0997	3.30625e-39	7.51337e-38
TUBGCP2	730.092	-0.897308	0.0685607	-13.0878	3.86709e-39	8.76399e-38
APPL1	1674.92	-0.600787	0.0459628	-13.0712	4.81221e-39	1.08764e-37
PICALM	603.194	-1.02846	0.0787462	-13.0604	5.54228e-39	1.25095e-37
TMED8	454.884	-1.18859	0.0910521	-13.054	6.031e-39	1.35942e-37
SERTAD2	1063.21	-0.755867	0.0579533	-13.0427	6.99395e-39	1.57435e-37
CUX1	2270.85	-0.529978	0.0406356	-13.0422	7.03849e-39	1.58224e-37
ASCC3	588.327	-1.01591	0.0779174	-13.0383	7.41366e-39	1.66433e-37
CEP170	1023.97	-0.739691	0.0567358	-13.0375	7.49068e-39	1.67936e-37
RREB1	725.656	-0.884782	0.0679203	-13.0268	8.61957e-39	1.92986e-37
S1PR4	1339.9	0.682853	0.0525161	13.0027	1.1803e-38	2.63906e-37
SPART	1714.19	-0.60393	0.0464761	-12.9944	1.31575e-38	2.93798e-37
ALCAM	1226.76	-0.687947	0.0529503	-12.9923	1.35266e-38	3.01637e-37
ZBED4	599.34	-1.04383	0.080358	-12.9897	1.39914e-38	3.11585e-37
KIAA0232	378.772	-1.27275	0.0979844	-12.9893	1.40738e-38	3.13002e-37
MTRNR2L1	352.887	-1.31665	0.101417	-12.9826	1.53601e-38	3.41154e-37
HNRNPK	6067.51	-0.319916	0.0246709	-12.9674	1.87357e-38	4.15574e-37
KDM6A	596.852	-1.04723	0.0808372	-12.9548	2.20624e-38	4.88712e-37
DHX40	488.847	-1.10148	0.0850832	-12.9459	2.47958e-38	5.48533e-37
MRPL18	905.354	0.794259	0.0613583	12.9446	2.52012e-38	5.56763e-37
IDH1	442.865	1.19139	0.0920825	12.9383	2.73467e-38	6.03364e-37
RBM12	564.664	-1.01061	0.0781149	-12.9375	2.76381e-38	6.08988e-37
AFTPH	738.489	-0.886861	0.0685918	-12.9295	3.06626e-38	6.74739e-37
CCDC6	367.104	-1.27793	0.0988518	-12.9278	3.13753e-38	6.89513e-37
KPNB1	2646.71	-0.457348	0.035384	-12.9253	3.24045e-38	7.11193e-37
CDK12	910.944	-0.788287	0.0609901	-12.9248	3.26025e-38	7.14599e-37
LTC4S	928.856	0.769334	0.0596269	12.9025	4.35927e-38	9.52984e-37
FNDC3B	424.134	-1.24406	0.0965369	-12.8869	5.33621e-38	1.16503e-36
PAPOLA	2430.85	-0.480565	0.0372926	-12.8863	5.37355e-38	1.17164e-36
CACNA2D4	592.469	1.0063	0.078125	12.8806	5.78658e-38	1.26006e-36
TRMT112	1811.28	0.545393	0.0423803	12.869	6.72415e-38	1.46231e-36
LIMS1	2019.94	0.525114	0.0408459	12.856	7.95968e-38	1.72874e-36
SRP72	2465.35	-0.491637	0.0382695	-12.8467	8.97354e-38	1.94641e-36
REPIN1	1096.26	0.727445	0.0566318	12.8452	9.15485e-38	1.98315e-36
PHIP	2579.69	-0.493888	0.0384607	-12.8414	9.61509e-38	2.08015e-36
GCC2	1549.68	-0.623712	0.0485869	-12.837	1.01682e-37	2.19697e-36
HSP90AA1	16507.7	-0.209281	0.0163042	-12.836	1.03073e-37	2.22413e-36
PRSS57	6625.25	0.293789	0.0229392	12.8073	1.49314e-37	3.21778e-36
JAK1	1695.1	-0.567116	0.0443456	-12.7886	1.89976e-37	4.08351e-36
ANO6	566.129	-0.997594	0.0780984	-12.7736	2.30398e-37	4.946e-36
IGF2BP2	2055.71	-0.535696	0.0420169	-12.7495	3.13627e-37	6.71541e-36
F8A1	393.957	1.20078	0.0942421	12.7415	3.477e-37	7.43544e-36
PIK3CB	452.105	-1.13939	0.0894283	-12.7408	3.50862e-37	7.49344e-36
TNFRSF1A	1091.48	0.708949	0.0556456	12.7404	3.52393e-37	7.51651e-36
KCNK17	612.693	0.93735	0.0735876	12.7379	3.6416e-37	7.75758e-36
PNRC2	1473.27	-0.611589	0.0480445	-12.7296	4.04656e-37	8.60927e-36
PBRM1	1503.74	-0.625247	0.0491195	-12.7291	4.07488e-37	8.65846e-36
AC026471.1	351.882	-1.31263	0.103163	-12.7239	4.35668e-37	9.24548e-36
SLC39A3	2502.13	0.471467	0.0370666	12.7195	4.61026e-37	9.77117e-36
NECAP1	563.66	-1.00914	0.0794815	-12.6966	6.17829e-37	1.30779e-35
SENP6	1224.52	-0.680127	0.0536047	-12.6878	6.90778e-37	1.46035e-35
KIAA1551	640.963	-0.933306	0.0736202	-12.6773	7.89982e-37	1.66796e-35
AL390728.6	458.713	1.10421	0.0871262	12.6737	8.26904e-37	1.74371e-35
PANK3	543.668	-1.00291	0.0791653	-12.6685	8.83945e-37	1.86164e-35
IPO7	976.652	-0.744124	0.0588227	-12.6503	1.11468e-36	2.34463e-35
ERH	2442.53	0.467257	0.0369493	12.6459	1.17881e-36	2.47638e-35
FAM30A	2363.44	0.478235	0.0378278	12.6424	1.23185e-36	2.58455e-35
DNM1L	1113.34	-0.702367	0.0555789	-12.6373	1.31521e-36	2.756e-35
NOP14	674.448	-0.973001	0.0770247	-12.6323	1.40057e-36	2.93119e-35
AKR1A1	1331.22	0.628045	0.0497897	12.614	1.76895e-36	3.69751e-35
KLF7	315.332	-1.38203	0.109676	-12.601	2.08525e-36	4.34774e-35
NDUFB5	1539.17	0.579641	0.0460166	12.5964	2.21103e-36	4.60424e-35
FLNA	1240.64	-0.657358	0.0522173	-12.5889	2.43033e-36	5.0546e-35
HECTD4	454.518	-1.12226	0.0892008	-12.5813	2.67571e-36	5.5511e-35
ASH1L	1496.83	-0.599634	0.0476612	-12.5812	2.6799e-36	5.55289e-35
YBX3	6121.98	-0.343748	0.0273459	-12.5704	3.07274e-36	6.3511e-35
GSPT1	1235.63	-0.700492	0.0557533	-12.5641	3.32431e-36	6.86255e-35
MAPK6	436.524	-1.18359	0.094237	-12.5598	3.51393e-36	7.24504e-35
RNMT	988.138	-0.820037	0.0653354	-12.5512	3.91515e-36	8.0623e-35
SKAP2	1945.33	-0.521625	0.0416148	-12.5346	4.82687e-36	9.92753e-35
YME1L1	1429.15	-0.63418	0.0506084	-12.5311	5.04404e-36	1.03614e-34
CNOT1	1004.08	-0.731596	0.0583977	-12.5278	5.25927e-36	1.07902e-34
RRBP1	951.456	-0.783077	0.0625401	-12.5212	5.71665e-36	1.16998e-34
CD38	1234.7	-0.680255	0.0543416	-12.5181	5.94165e-36	1.21454e-34
CDK5RAP2	638.614	-0.959758	0.0767101	-12.5115	6.45892e-36	1.31866e-34
HERC1	926.126	-0.8127	0.0650006	-12.503	7.19147e-36	1.46464e-34
NET1	391.505	-1.21667	0.0974775	-12.4816	9.41196e-36	1.91453e-34
CHCHD2	8197.64	0.271753	0.0217858	12.4739	1.03679e-35	2.10641e-34
CLEC11A	6998.23	0.283436	0.0227302	12.4696	1.09412e-35	2.22018e-34
ADA	900.051	0.749973	0.0601574	12.4668	1.13223e-35	2.29472e-34
SNX3	3399.75	0.404264	0.0324498	12.4582	1.26252e-35	2.55568e-34
UBR2	698.21	-0.871066	0.0699295	-12.4563	1.29161e-35	2.6114e-34
RALBP1	2001.33	-0.528199	0.0424254	-12.4501	1.39707e-35	2.81779e-34
SUPT6H	690.471	-0.888556	0.0714143	-12.4423	1.54046e-35	3.10324e-34
HIST1H2AH	409.769	-1.18838	0.0955349	-12.4392	1.60117e-35	3.22166e-34
DAD1	1919.6	0.522283	0.0420194	12.4296	1.80607e-35	3.62954e-34
DOCK11	643.723	-0.943747	0.0759294	-12.4293	1.81291e-35	3.63891e-34
RNF168	1000.3	-0.725879	0.0584525	-12.4183	2.08012e-35	4.17025e-34
AP3B1	736.893	-0.855172	0.0690119	-12.3917	2.89972e-35	5.79943e-34
MSH2	869.263	-0.767888	0.0619747	-12.3904	2.94748e-35	5.88791e-34
STK4	2308.47	-0.467798	0.0377853	-12.3804	3.33597e-35	6.65597e-34
ARID1A	1690.06	-0.597123	0.0482795	-12.368	3.89212e-35	7.75634e-34
C12orf57	3702.04	0.381738	0.0308826	12.361	4.25101e-35	8.45135e-34
STAB1	395.702	1.14982	0.0930216	12.3608	4.25857e-35	8.4563e-34
HNRNPF	3427.54	0.388012	0.0314164	12.3506	4.83259e-35	9.58474e-34
ZBTB10	494.668	-1.08311	0.0877722	-12.34	5.51488e-35	1.0912e-33
LINC01089	490.619	1.02873	0.0833797	12.3379	5.65871e-35	1.11833e-33
EPRS	1412.21	-0.602797	0.0489065	-12.3255	6.60384e-35	1.30358e-33
AL157895.1	1242.58	0.686558	0.0557282	12.3198	7.09128e-35	1.39649e-33
PPP2R5C	765.995	-0.848285	0.0688872	-12.3141	7.60407e-35	1.49571e-33
CD247	628.202	0.91694	0.0744913	12.3094	8.06637e-35	1.58291e-33
LYSMD2	1468.56	0.57628	0.0468176	12.309	8.09858e-35	1.58736e-33
KDM5A	1604.96	-0.569167	0.0463789	-12.2721	1.2785e-34	2.50005e-33
PPP1R18	553.664	0.95821	0.0783131	12.2356	2.0053e-34	3.91667e-33
MBOAT7	1080.13	0.680799	0.0556834	12.2263	2.25072e-34	4.38576e-33
ANKRD18B	421.795	-1.14988	0.0941029	-12.2194	2.44762e-34	4.76387e-33
EZH2	798.369	-0.855712	0.0700495	-12.2158	2.55925e-34	4.97533e-33
MAML3	426.42	-1.12653	0.0922272	-12.2147	2.59298e-34	5.03503e-33
ANKLE2	919.869	-0.753166	0.0616739	-12.2121	2.67971e-34	5.19739e-33
TSC22D4	912.583	0.753639	0.0617186	12.2109	2.71941e-34	5.26827e-33
SAV1	628.983	-0.923851	0.0756801	-12.2073	2.84108e-34	5.49759e-33
NSD2	1085.55	-0.75126	0.0615446	-12.2068	2.86078e-34	5.5293e-33
UNC50	335.993	1.26167	0.10342	12.1995	3.12867e-34	6.04008e-33
MPHOSPH9	1157.23	-0.657552	0.0540789	-12.1591	5.13151e-34	9.87238e-33
SNRK	538.15	-0.97939	0.0805914	-12.1525	5.56143e-34	1.06872e-32
IGF1R	311.308	-1.29656	0.10674	-12.1469	5.95571e-34	1.14317e-32
FXYD5	3618.13	0.374407	0.0308317	12.1436	6.20554e-34	1.18975e-32
SPN	6816.39	-0.288347	0.0237455	-12.1432	6.23179e-34	1.19341e-32
GMFG	4616.84	0.3236	0.0266562	12.1397	6.50288e-34	1.2439e-32
TGFB1	1066.28	0.692828	0.0571233	12.1287	7.44642e-34	1.42275e-32
ATP13A3	696.208	-0.920418	0.0759071	-12.1256	7.73025e-34	1.47529e-32
TARS	833.421	-0.785896	0.064837	-12.1211	8.16575e-34	1.55662e-32
LITAF	1492.09	0.575131	0.0474539	12.1198	8.29844e-34	1.58011e-32
NUB1	962.474	-0.716322	0.0591324	-12.1139	8.91866e-34	1.69627e-32
FCHSD2	634.708	-0.89096	0.0736953	-12.0898	1.19608e-33	2.26711e-32
WBP11	897.484	-0.768955	0.063717	-12.0683	1.55348e-33	2.93788e-32
CTSD	1716.2	0.520488	0.0431523	12.0616	1.68388e-33	3.18087e-32
HSPE1	2297.45	0.452762	0.0375718	12.0506	1.9257e-33	3.63355e-32
NPC2	1679.58	0.545785	0.0453137	12.0446	2.07126e-33	3.90379e-32
PTPN6	1877.07	0.513492	0.0426553	12.0382	2.2381e-33	4.20875e-32
LIMD2	1961.31	0.515561	0.0428394	12.0347	2.33418e-33	4.38448e-32
STAG2	690.177	-0.85759	0.0713117	-12.0259	2.59654e-33	4.86632e-32
USP15	1952.78	-0.493555	0.0410577	-12.021	2.7558e-33	5.15901e-32
ARCN1	527.492	-0.989811	0.0826037	-11.9826	4.38158e-33	8.18418e-32
SEPHS2	987.794	0.708905	0.0591709	11.9806	4.4891e-33	8.37563e-32
RBM33	1095.83	-0.690384	0.0576705	-11.9712	5.03034e-33	9.36452e-32
TOP1MT	659.486	-0.906798	0.0757631	-11.9689	5.17274e-33	9.61888e-32
PCNX1	828.513	-0.761962	0.0637599	-11.9505	6.45384e-33	1.19878e-31
LGALS1	4374.96	0.767455	0.064244	11.9459	6.81763e-33	1.26494e-31
PUM2	1011.85	-0.701238	0.0587015	-11.9458	6.82589e-33	1.26507e-31
NF1	852.163	-0.783495	0.0656452	-11.9353	7.74761e-33	1.4343e-31
EIF3J	1207.88	-0.632082	0.052972	-11.9324	8.02551e-33	1.4841e-31
SSR2	3305.12	0.377039	0.0316334	11.919	9.41797e-33	1.73966e-31
USF3	383.561	-1.20645	0.101349	-11.9039	1.12886e-32	2.08289e-31
CHD3	1196.23	-0.645518	0.0542456	-11.8999	1.18463e-32	2.18338e-31
SLC7A5	373.833	-1.16435	0.0979535	-11.8868	1.3863e-32	2.55226e-31
AHCTF1	485.661	-1.00733	0.0849051	-11.8642	1.81609e-32	3.33984e-31
RNF145	315.971	-1.3759	0.116116	-11.8493	2.16915e-32	3.98035e-31
ZNF217	403.526	-1.1519	0.0973976	-11.8268	2.83689e-32	5.18852e-31
TBC1D10C	902.661	0.737677	0.0623757	11.8264	2.8526e-32	5.21154e-31
MAN1A1	316.034	-1.25739	0.106323	-11.8262	2.8591e-32	5.21769e-31
OCIAD2	1003.11	0.746033	0.0631031	11.8225	2.9882e-32	5.44734e-31
CTNND1	336.559	-1.26758	0.107275	-11.8162	3.21952e-32	5.86262e-31
ERBIN	612.527	-0.878916	0.0744494	-11.8055	3.65398e-32	6.63926e-31
UBXN7	677.344	-0.898441	0.0761498	-11.7983	3.98095e-32	7.22549e-31
PRDX6	3183.93	0.388711	0.0329773	11.7872	4.54237e-32	8.22656e-31
RPLP2	37272.9	-0.129054	0.0109652	-11.7695	5.60848e-32	1.01354e-30
TBL1XR1	1837.44	-0.50135	0.0426008	-11.7686	5.66738e-32	1.02307e-30
YY1	2380.78	-0.443112	0.0376754	-11.7613	6.17745e-32	1.11274e-30
CCP110	673.156	-0.845388	0.0719203	-11.7545	6.69512e-32	1.20469e-30
BCL7A	820.648	-0.775419	0.0659689	-11.7543	6.71153e-32	1.20634e-30
KMT2A	1870.82	-0.496095	0.0422958	-11.7292	9.03472e-32	1.62216e-30
AC090152.1	347.559	1.1516	0.0982065	11.7263	9.34191e-32	1.67552e-30
GOLGA4	1285.6	-0.655101	0.0558746	-11.7245	9.54691e-32	1.71045e-30
CMC1	516.496	0.966161	0.0825555	11.7032	1.22767e-31	2.19716e-30
SPTA1	344.927	-3.57722	0.305756	-11.6996	1.28098e-31	2.29011e-30
RGS18	1413.63	0.589179	0.0503718	11.6966	1.32635e-31	2.36868e-30
ITM2C	1248.8	0.632269	0.054065	11.6946	1.3579e-31	2.42244e-30
PIBF1	640.144	-0.855011	0.0731631	-11.6864	1.49628e-31	2.66077e-30
ZC3H7A	708.629	-0.824501	0.0706001	-11.6785	1.64221e-31	2.91715e-30
HIF1A	553.91	-0.918825	0.0787815	-11.6629	1.97097e-31	3.4937e-30
CLIP1	709.969	-0.880106	0.0754675	-11.6621	1.99178e-31	3.52685e-30
CUTA	2105.55	0.486262	0.0417459	11.6481	2.34531e-31	4.14405e-30
TLK2	635.743	-0.856544	0.0735743	-11.6419	2.52364e-31	4.45443e-30
ACTR3	2317.37	-0.448583	0.0385465	-11.6374	2.65846e-31	4.68743e-30
CDK6	6396.73	-0.270987	0.023291	-11.6348	2.74177e-31	4.82922e-30
IPO5	1114.03	-0.676364	0.0581941	-11.6225	3.16568e-31	5.56413e-30
TARBP1	1032.39	-0.669305	0.0576043	-11.619	3.29937e-31	5.79301e-30
PRH1	454.762	1.01307	0.0871983	11.618	3.33689e-31	5.85272e-30
CD48	1017.17	0.669003	0.0576133	11.6119	3.58357e-31	6.27877e-30
ARL4A	1026.06	-0.699987	0.0603152	-11.6055	3.86497e-31	6.75764e-30
COPS2	712.516	-0.811931	0.0699609	-11.6055	3.86498e-31	6.75764e-30
NUCB2	9170.56	0.223588	0.0192666	11.605	3.88872e-31	6.79202e-30
RSRP1	2691.41	0.41852	0.0360854	11.598	4.21717e-31	7.35799e-30
PGK1	3114.32	0.372285	0.0321396	11.5834	5.00434e-31	8.7223e-30
ADAM17	578.105	-0.893184	0.0771567	-11.5762	5.43867e-31	9.46941e-30
CEP192	506.033	-0.98881	0.0854383	-11.5734	5.6222e-31	9.77876e-30
YLPM1	801.808	-0.753675	0.0651718	-11.5644	6.24031e-31	1.08425e-29
LIG3	510.702	-0.946543	0.0818622	-11.5626	6.37184e-31	1.10595e-29
RPL4	22277.6	0.150726	0.0130383	11.5603	6.54703e-31	1.13518e-29
ACAP2	1628.6	-0.530632	0.0459108	-11.5579	6.73374e-31	1.16634e-29
METAP2	1500.81	-0.57052	0.0493733	-11.5552	6.94579e-31	1.20182e-29
NOLC1	787.469	-0.767185	0.0664065	-11.5528	7.14133e-31	1.23438e-29
CCM2	620.054	0.836924	0.0724526	11.5513	7.26908e-31	1.25516e-29
SMG1	1982.12	-0.483768	0.041885	-11.5499	7.39103e-31	1.27423e-29
PRKAR1A	1136.9	-0.656574	0.056847	-11.5499	7.39482e-31	1.27423e-29
PAFAH1B2	733.47	-0.77478	0.0671015	-11.5464	7.69904e-31	1.32528e-29
NUFIP2	1681.82	-0.542539	0.0470155	-11.5396	8.3337e-31	1.43305e-29
NCOA1	630.441	-0.875319	0.0758786	-11.5358	8.70974e-31	1.49617e-29
MIA3	719.883	-0.82788	0.0717832	-11.5331	8.98991e-31	1.54271e-29
RCOR1	691.865	-0.84294	0.0731224	-11.5278	9.5565e-31	1.63826e-29
DDX24	1809.28	-0.534757	0.0463914	-11.5271	9.63734e-31	1.65042e-29
GCA	826.809	0.729425	0.0633336	11.5172	1.08064e-30	1.84873e-29
CTSC	1631.04	0.548522	0.0476988	11.4997	1.32386e-30	2.26249e-29
NAA50	781.863	-0.753483	0.0655384	-11.4968	1.36879e-30	2.3369e-29
DDX5	7793.88	-0.255012	0.0221821	-11.4963	1.37702e-30	2.34853e-29
DNAJC7	1762.21	-0.504687	0.0439215	-11.4907	1.46999e-30	2.50454e-29
CCDC136	376.653	-1.1382	0.0991837	-11.4756	1.74906e-30	2.97697e-29
NCAPG2	347.687	-1.20366	0.104967	-11.467	1.93188e-30	3.28145e-29
PPP4C	982.246	0.656456	0.057247	11.4671	1.93073e-30	3.28145e-29
FBXO9	618.121	-0.84047	0.0734008	-11.4504	2.33971e-30	3.97013e-29
TBXAS1	1329.88	0.585887	0.0511859	11.4462	2.45556e-30	4.16247e-29
INO80D	549.793	-0.89628	0.0783117	-11.445	2.49003e-30	4.21662e-29
GCHFR	373.272	1.0855	0.0949214	11.4358	2.7707e-30	4.68716e-29
TOP1	2107.51	-0.464484	0.0406521	-11.4258	3.10715e-30	5.25099e-29
BLOC1S4	411.237	1.06532	0.0932416	11.4254	3.12377e-30	5.27373e-29
NSMCE3	413.999	1.04197	0.0912006	11.425	3.13528e-30	5.28781e-29
TM7SF3	3245.19	0.365437	0.0319867	11.4246	3.14941e-30	5.30627e-29
LDHB	7201.01	0.258227	0.0226279	11.4119	3.64675e-30	6.13802e-29
GTF2F1	743.182	-0.793481	0.0695574	-11.4076	3.83316e-30	6.44527e-29
RYBP	698.637	-0.797979	0.0699598	-11.4063	3.89142e-30	6.53665e-29
RPS17	1911.36	0.497221	0.0435934	11.4059	3.90867e-30	6.55902e-29
LSM4	2360.95	0.437884	0.0384037	11.4021	4.07978e-30	6.83926e-29
MSN	3374.64	-0.375941	0.0329842	-11.3976	4.29808e-30	7.198e-29
CKS2	976.701	0.780119	0.0685049	11.3878	4.81023e-30	8.03954e-29
MORF4L1	3575.31	-0.34993	0.0307435	-11.3823	5.12466e-30	8.55649e-29
CELF1	1266.12	-0.597858	0.052568	-11.373	5.69653e-30	9.50181e-29
AP2B1	579.359	-0.913247	0.0803065	-11.372	5.76439e-30	9.6054e-29
TNFRSF14	343.03	1.14508	0.100694	11.3719	5.77193e-30	9.60836e-29
ORAI1	1336.5	0.557714	0.0490933	11.3603	6.59278e-30	1.09639e-28
RBMX	3494.78	-0.377578	0.0332378	-11.3599	6.62208e-30	1.10016e-28
SRSF9	2680.12	0.394882	0.0347752	11.3553	6.98272e-30	1.15892e-28
TMSB10	13030.9	0.200199	0.0176311	11.3548	7.01606e-30	1.1633e-28
TAOK1	851.627	-0.715495	0.0630233	-11.3529	7.17755e-30	1.18889e-28
SMIM24	3311.44	0.378029	0.033322	11.3447	7.87862e-30	1.30372e-28
CPT1A	926.901	-0.685026	0.0604217	-11.3374	8.56465e-30	1.41584e-28
USP9X	633.463	-0.837253	0.0739285	-11.3252	9.8485e-30	1.62647e-28
ERC1	439.562	-1.00436	0.0887552	-11.3161	1.09192e-29	1.8015e-28
PPIP5K2	1241.34	-0.613803	0.0542655	-11.3111	1.1562e-29	1.90567e-28
SMIM30	636.998	0.828704	0.0733201	11.3026	1.2745e-29	2.09859e-28
SAFB	1121.57	-0.614117	0.0544123	-11.2864	1.53239e-29	2.52073e-28
RCOR3	660.606	-0.817289	0.072415	-11.2862	1.53562e-29	2.52355e-28
CDCA7L	1486.92	-0.56263	0.0498575	-11.2848	1.56065e-29	2.56217e-28
SLC40A1	2348.84	-0.430229	0.0381334	-11.2822	1.60669e-29	2.63516e-28
TIMP1	998.625	0.667602	0.059244	11.2687	1.87336e-29	3.06951e-28
CSNK2B	1713.21	0.490095	0.043498	11.2671	1.90809e-29	3.12335e-28
MBNL3	471.135	-1.10101	0.097758	-11.2626	2.00755e-29	3.28293e-28
KLF6	4551.72	-0.351655	0.0312498	-11.253	2.23807e-29	3.65631e-28
CMIP	405.211	-1.05149	0.0935377	-11.2413	2.55563e-29	4.17102e-28
TTC37	955.23	-0.674501	0.0600577	-11.2309	2.87594e-29	4.68922e-28
EP400	558.098	-0.917406	0.0817665	-11.2198	3.25899e-29	5.30859e-28
MRPL17	384.005	1.04658	0.0932961	11.2178	3.33391e-29	5.42533e-28
MAFG	921.242	0.71681	0.0639257	11.2132	3.51375e-29	5.71241e-28
TRIM33	1016.02	-0.639563	0.0570594	-11.2087	3.69537e-29	6.00183e-28
RICTOR	1274.88	-0.57539	0.0513588	-11.2033	3.92703e-29	6.37187e-28
GATAD2A	529.914	-0.904839	0.0807868	-11.2003	4.06209e-29	6.58461e-28
CLPX	684.628	-0.777652	0.0694881	-11.1911	4.50582e-29	7.29681e-28
TNFAIP8	1182.98	-0.596561	0.0533128	-11.1898	4.57369e-29	7.39952e-28
RNH1	905.86	0.679921	0.0608573	11.1724	5.56763e-29	8.99885e-28
MEST	579.25	0.834532	0.0747755	11.1605	6.36293e-29	1.02743e-27
RSRC2	1849.21	-0.48192	0.0431886	-11.1585	6.50735e-29	1.04973e-27
DDX42	1087.05	-0.618407	0.0554672	-11.1491	7.23608e-29	1.16616e-27
ATP2B1	506.724	-0.98528	0.0884568	-11.1386	8.14312e-29	1.31107e-27
TRAPPC10	505.141	-0.912076	0.0819791	-11.1257	9.40582e-29	1.51146e-27
RLF	306.172	-1.22521	0.110139	-11.1243	9.55609e-29	1.53413e-27
ISCU	928.368	0.66858	0.0601232	11.1202	1.00088e-28	1.60526e-27
TERF2	396.862	-1.03084	0.0929022	-11.0959	1.31278e-28	2.10347e-27
ARFGEF2	348.493	-1.11814	0.100831	-11.0892	1.41565e-28	2.26613e-27
ATRAID	908.946	0.674758	0.0608593	11.0872	1.44775e-28	2.31308e-27
USP22	1007.21	-0.642995	0.057994	-11.0873	1.44651e-28	2.31308e-27
CKAP5	586.241	-0.881124	0.0794952	-11.084	1.50037e-28	2.39484e-27
POU2F1	613.155	-0.82526	0.0744686	-11.082	1.53415e-28	2.44643e-27
ADNP	977.751	-0.668072	0.0602934	-11.0804	1.56257e-28	2.48937e-27
CLTA	2544.82	0.409514	0.0369675	11.0777	1.60962e-28	2.56188e-27
CCT7	1894.3	0.470035	0.0424411	11.075	1.65886e-28	2.63772e-27
MCTP2	1076.51	-0.626888	0.0567115	-11.054	2.09704e-28	3.32497e-27
CNTLN	752.886	-0.741402	0.0671363	-11.0432	2.36374e-28	3.74427e-27
SPOPL	325.939	-1.15135	0.104282	-11.0407	2.43119e-28	3.84746e-27
WASF2	2476.68	-0.408389	0.037011	-11.0343	2.61203e-28	4.12973e-27
PDK1	306.849	-1.23613	0.112053	-11.0317	2.68865e-28	4.24685e-27
TOMM7	5645.82	-0.265778	0.0241049	-11.0259	2.86634e-28	4.52323e-27
YWHAG	844.182	-0.722735	0.065693	-11.0017	3.75012e-28	5.90671e-27
ASRGL1	565.377	-0.847609	0.0771025	-10.9933	4.11734e-28	6.46679e-27
CDC73	530.31	-0.882711	0.0803001	-10.9926	4.14575e-28	6.50528e-27
POLR2A	1234.78	-0.567439	0.0516212	-10.9924	4.15876e-28	6.51956e-27
SCMH1	522.48	0.883598	0.0804172	10.9877	4.38095e-28	6.86143e-27
STAG1	603.458	-0.84225	0.0766597	-10.9869	4.41992e-28	6.91598e-27
CXCL2	689.34	-0.857624	0.0781152	-10.979	4.824e-28	7.54117e-27
WRN	347.851	-1.15767	0.105445	-10.9789	4.82935e-28	7.54247e-27
KIAA1143	598.823	-0.861531	0.078497	-10.9753	5.02239e-28	7.83662e-27
KIF5B	1727.66	-0.496082	0.045208	-10.9733	5.13494e-28	8.00474e-27
ZFR	1025.47	-0.641967	0.0585557	-10.9634	5.73262e-28	8.92812e-27
SMDT1	3044.96	0.364393	0.0332404	10.9623	5.7975e-28	9.02074e-27
WDR26	540.056	-0.902487	0.0823903	-10.9538	6.37201e-28	9.89619e-27
RPLP1	172118	-0.0761565	0.00695464	-10.9505	6.61105e-28	1.02579e-26
BRAF	907.387	-0.674557	0.0616339	-10.9446	7.05498e-28	1.09365e-26
CTSG	1645.86	-0.618008	0.0565063	-10.937	7.67179e-28	1.18817e-26
C4orf3	1578.02	0.499066	0.0456914	10.9225	8.99424e-28	1.38911e-26
PSMB8-AS1	373.18	1.04875	0.0960648	10.9171	9.54745e-28	1.47319e-26
SLC25A36	1532.4	-0.509836	0.0467055	-10.916	9.66729e-28	1.4903e-26
BAZ2B	1759.21	-0.498521	0.0456942	-10.9099	1.03317e-27	1.59125e-26
ATAD2B	572.717	-0.850388	0.0779654	-10.9072	1.06433e-27	1.63773e-26
DDX46	2371.15	-0.411797	0.0377579	-10.9062	1.07613e-27	1.65381e-26
EIF3L	7733.05	0.228609	0.0209614	10.9062	1.07676e-27	1.65381e-26
ABHD14B	1002.44	0.63956	0.0586798	10.8992	1.16335e-27	1.78427e-26
EZR	639.239	-0.805652	0.073919	-10.8991	1.16384e-27	1.78427e-26
C9orf78	1452.48	-0.530441	0.0486692	-10.8989	1.16639e-27	1.78654e-26
CWF19L2	545.265	-0.859044	0.078821	-10.8987	1.16957e-27	1.78977e-26
TMEM230	1427.65	0.526514	0.048317	10.8971	1.19014e-27	1.81957e-26
MBTPS1	712.04	-0.745396	0.0684726	-10.886	1.34358e-27	2.05229e-26
DCK	680.903	0.750432	0.0689491	10.8839	1.37609e-27	2.10001e-26
PPM1A	546.162	-0.894454	0.082298	-10.8685	1.62902e-27	2.48146e-26
SRRT	635.171	-0.800021	0.0736443	-10.8633	1.72389e-27	2.62358e-26
GMPS	1089.65	-0.610179	0.0561991	-10.8575	1.83805e-27	2.79477e-26
PIK3AP1	524.24	-0.891189	0.0820936	-10.8558	1.87228e-27	2.84423e-26
MCPH1	432.372	-1.00577	0.0926563	-10.8548	1.89206e-27	2.87166e-26
RTF1	1780.66	-0.494075	0.0455609	-10.8443	2.12337e-27	3.21688e-26
LMO2	1222.56	0.569798	0.0525551	10.8419	2.17898e-27	3.29757e-26
CHD8	808.351	-0.704432	0.0650691	-10.8259	2.595e-27	3.92071e-26
BNIP2	1218.51	-0.61381	0.0567088	-10.8239	2.65252e-27	4.00399e-26
WASHC1	619.047	0.817736	0.0755627	10.822	2.70941e-27	4.08616e-26
PLIN3	2169.49	0.42072	0.0388805	10.8209	2.74216e-27	4.13182e-26
NSD1	849.148	-0.697025	0.0644474	-10.8154	2.91019e-27	4.38104e-26
ZNF644	1137.8	-0.600178	0.0555239	-10.8093	3.10873e-27	4.67149e-26
AKR1C3	813.747	0.709758	0.0656868	10.8052	3.25276e-27	4.88354e-26
BOD1L1	2292.81	-0.418073	0.0387144	-10.7989	3.48326e-27	5.22489e-26
FBXO34	684.865	-0.76952	0.0713459	-10.7858	4.01873e-27	6.02268e-26
SERP1	5329.57	0.272525	0.0252787	10.7808	4.2413e-27	6.34483e-26
TTF2	927.166	-0.648537	0.0601645	-10.7794	4.30684e-27	6.4333e-26
DIAPH1	1147.23	-0.580388	0.0538425	-10.7794	4.30815e-27	6.4333e-26
XPC	675.546	-0.758662	0.0704045	-10.7758	4.48045e-27	6.68461e-26
RPS27L	2478.55	0.413794	0.038518	10.7429	6.40226e-27	9.54332e-26
SMARCAD1	491.395	-0.917732	0.0854557	-10.7393	6.65678e-27	9.91385e-26
ERCC6L2	487.414	-0.914048	0.0851413	-10.7357	6.92278e-27	1.03008e-25
TRG-AS1	377.303	1.04486	0.0974208	10.7252	7.74915e-27	1.15099e-25
RTRAF	3137.2	0.364566	0.0339951	10.7241	7.84634e-27	1.16439e-25
PHYKPL	596.412	0.793135	0.0739796	10.721	8.11257e-27	1.20176e-25
WAC	1653.89	-0.481273	0.0449054	-10.7175	8.42613e-27	1.2471e-25
BMS1	664.344	-0.77647	0.0724544	-10.7167	8.50002e-27	1.25692e-25
MRPL16	748.995	0.746564	0.0698206	10.6926	1.10228e-26	1.62853e-25
LPGAT1	929.195	-0.66571	0.0622811	-10.6888	1.14863e-26	1.6955e-25
ZRANB1	452.96	-0.949184	0.0888078	-10.6881	1.15748e-26	1.70705e-25
CXXC5	2702.66	0.3918	0.036668	10.6851	1.19556e-26	1.76166e-25
POLE3	1136.69	-0.577292	0.054035	-10.6837	1.21382e-26	1.78699e-25
CD99	2324.28	0.401006	0.0375424	10.6814	1.24377e-26	1.82946e-25
TRAPPC1	1605.26	0.490012	0.0459158	10.672	1.37672e-26	2.02324e-25
CDK17	321.014	-1.16572	0.109284	-10.6668	1.45516e-26	2.13663e-25
ARPP19	1038.56	-0.636345	0.059735	-10.6528	1.69177e-26	2.47967e-25
BZW1	2022.61	-0.455781	0.0428099	-10.6466	1.80788e-26	2.64754e-25
THOC3	436.151	0.938995	0.0882899	10.6354	2.04035e-26	2.98535e-25
ETHE1	868.855	0.657699	0.0618505	10.6337	2.07732e-26	3.03679e-25
THUMPD3-AS1	944.691	0.629077	0.0591851	10.629	2.18492e-26	3.19128e-25
PARP14	946.133	-0.646055	0.0608188	-10.6226	2.33895e-26	3.41327e-25
RPL27A	41705.7	-0.112711	0.0106117	-10.6214	2.36932e-26	3.45457e-25
PPP4R3B	1014.04	-0.603345	0.0568255	-10.6175	2.47069e-26	3.59923e-25
CORO1A	4112.1	0.307347	0.0289759	10.607	2.76538e-26	4.025e-25
RPS26	23285.3	0.144352	0.0136127	10.6042	2.84912e-26	4.14327e-25
MRPS18C	950.516	0.664094	0.06263	10.6034	2.87215e-26	4.17312e-25
STAT3	1777.08	-0.473203	0.0446795	-10.591	3.27898e-26	4.75181e-25
SECISBP2	1144.64	-0.601194	0.0567659	-10.5907	3.2896e-26	4.76306e-25
PSME1	3277.22	0.355079	0.0335281	10.5905	3.29891e-26	4.7724e-25
HSPA9	1688.49	-0.479054	0.045248	-10.5873	3.41305e-26	4.93324e-25
UPF2	1273.72	-0.535367	0.0506091	-10.5785	3.75056e-26	5.41639e-25
COX7A2L	3175.54	0.351554	0.0332374	10.5771	3.80734e-26	5.49364e-25
NDUFV2	1384.15	0.514336	0.0486321	10.5761	3.84768e-26	5.54705e-25
TGFBRAP1	606.898	-0.810358	0.0766991	-10.5654	4.30996e-26	6.20813e-25
ABCB10	327.32	-1.23642	0.117039	-10.5641	4.37076e-26	6.29028e-25
ZMYM2	1510.23	-0.499852	0.0473213	-10.5629	4.42559e-26	6.36369e-25
NUP153	603.84	-0.797543	0.0755086	-10.5623	4.45665e-26	6.40284e-25
UBQLN1	756.187	-0.703067	0.0665698	-10.5614	4.50098e-26	6.46096e-25
HOPX	2811.36	0.372011	0.0352313	10.5591	4.61072e-26	6.61279e-25
HSPA4	669.288	-0.767489	0.0727408	-10.551	5.02539e-26	7.19516e-25
FCER1G	409.688	0.977445	0.0926541	10.5494	5.11214e-26	7.31307e-25
CRCP	578.719	-0.809873	0.0768132	-10.5434	5.44863e-26	7.78109e-25
MRM2	336.695	1.09553	0.104075	10.5264	6.52725e-26	9.30552e-25
MAT2A	2320	0.415495	0.039478	10.5247	6.64619e-26	9.46699e-25
EEF1D	11342.8	0.184207	0.0175082	10.5212	6.89793e-26	9.80882e-25
RHEB	1349.43	0.521961	0.0496613	10.5104	7.73495e-26	1.09897e-24
PPP1R15B	576.706	-0.796618	0.0758166	-10.5072	8.00578e-26	1.13648e-24
SIGIRR	894.953	0.64195	0.0612062	10.4883	9.77492e-26	1.38527e-24
MED12L	614.321	-0.775628	0.0740054	-10.4807	1.05974e-25	1.50055e-24
PPP1R2	734.735	-0.71928	0.0686437	-10.4785	1.08497e-25	1.53497e-24
DDX10	542.737	-0.834492	0.0796595	-10.4757	1.11661e-25	1.5784e-24
ACSL4	382.577	-0.995909	0.0950916	-10.4731	1.14761e-25	1.62085e-24
ZNRD1	1282.59	0.525202	0.0501517	10.4723	1.15829e-25	1.63454e-24
DDB1	889.907	-0.641281	0.0612444	-10.4709	1.17581e-25	1.65786e-24
HIKESHI	619.236	0.804385	0.0768596	10.4656	1.24243e-25	1.75032e-24
FNDC3A	734.725	-0.723386	0.0692787	-10.4417	1.59959e-25	2.25158e-24
CEBPZ	1138.61	-0.572781	0.0549075	-10.4317	1.77598e-25	2.49775e-24
HLTF	669.651	-0.773094	0.0741701	-10.4232	1.94209e-25	2.72906e-24
SEC11A	2678.45	0.368641	0.0353674	10.4232	1.94375e-25	2.7291e-24
MPRIP	826.185	-0.685709	0.0657886	-10.4229	1.94889e-25	2.73401e-24
MYSM1	565.505	-0.79731	0.0765981	-10.409	2.25567e-25	3.15642e-24
CLSPN	741.803	-0.714708	0.0686863	-10.4054	2.34261e-25	3.27534e-24
GGH	380.719	0.989272	0.0951158	10.4007	2.46075e-25	3.43763e-24
MEX3C	518.967	-0.853059	0.0820927	-10.3914	2.71321e-25	3.78714e-24
ELMO1	2052.59	-0.417931	0.0402195	-10.3913	2.7173e-25	3.78968e-24
TMEM30A	616.199	-0.814065	0.0785365	-10.3654	3.56137e-25	4.95857e-24
TSC22D2	396.409	-0.987585	0.0953067	-10.3622	3.68478e-25	5.12611e-24
CCDC115	586.488	0.796463	0.0769267	10.3535	4.033e-25	5.60587e-24
AES	2330.54	0.407024	0.0393732	10.3376	4.763e-25	6.61506e-24
CFP	300.809	1.14717	0.110988	10.336	4.84361e-25	6.72142e-24
NUCKS1	5404.82	-0.299535	0.0289948	-10.3307	5.12096e-25	7.10038e-24
EP300	843.178	-0.664466	0.0643233	-10.3301	5.15082e-25	7.13585e-24
IK	1613.84	-0.467906	0.0453212	-10.3242	5.47622e-25	7.58036e-24
WDR48	564.667	-0.81321	0.0787725	-10.3235	5.51605e-25	7.62917e-24
AC007952.4	397.147	0.94286	0.0913527	10.3211	5.65792e-25	7.8189e-24
SLFN11	468.383	-0.916077	0.0887941	-10.3169	5.91267e-25	8.16419e-24
ABCE1	1363.76	-0.510135	0.0494477	-10.3167	5.92474e-25	8.17408e-24
MTREX	673.899	-0.731615	0.0709388	-10.3133	6.13366e-25	8.45532e-24
NPEPPS	898.286	-0.635055	0.061608	-10.308	6.48432e-25	8.93133e-24
ARPC2	6917.7	0.228972	0.0222395	10.2957	7.36649e-25	1.0138e-23
FBXL5	579.779	-0.805325	0.0782214	-10.2955	7.38717e-25	1.01581e-23
GRB2	1599.37	-0.47491	0.0461437	-10.292	7.65884e-25	1.05144e-23
UBA6	777.369	-0.68465	0.0666104	-10.2784	8.81534e-25	1.20722e-23
CDYL	414.659	-0.955748	0.0930028	-10.2765	8.98902e-25	1.23e-23
CD151	348.393	1.02114	0.0993708	10.2761	9.03263e-25	1.23495e-23
SRSF4	1821.46	-0.439637	0.0427903	-10.2742	9.20751e-25	1.25783e-23
CAND1	1019.16	-0.598928	0.058298	-10.2736	9.27146e-25	1.26553e-23
DIS3	665.906	-0.765287	0.0744926	-10.2733	9.29397e-25	1.26757e-23
SFT2D2	771.652	-0.686203	0.0668171	-10.2699	9.63427e-25	1.31291e-23
AK6	441.438	0.913587	0.0889613	10.2695	9.67218e-25	1.317e-23
HMBS	540.675	-2.12112	0.206683	-10.2627	1.03786e-24	1.41204e-23
GADD45B	463.122	-0.923543	0.0901558	-10.2439	1.26106e-24	1.7143e-23
VDAC2	2402.8	0.374223	0.0365475	10.2394	1.32115e-24	1.79307e-23
TMBIM6	3327.93	0.320985	0.0313586	10.236	1.36844e-24	1.85574e-23
EGFL7	1132.67	0.559142	0.0546517	10.231	1.44e-24	1.9512e-23
GPCPD1	394.121	-0.942267	0.0921888	-10.2211	1.59594e-24	2.16074e-23
CEP290	731.129	-0.734543	0.0718867	-10.2181	1.64612e-24	2.22687e-23
RNASET2	1473.25	0.506604	0.0497143	10.1903	2.19082e-24	2.96134e-23
TWF2	1224.13	0.531078	0.0521485	10.184	2.33826e-24	3.15807e-23
CYLD	720.189	-0.762098	0.0748812	-10.1774	2.50066e-24	3.37468e-23
PHF20	1325.45	-0.504134	0.0495558	-10.1731	2.61583e-24	3.52725e-23
MPO	1910.17	-2.55173	0.250868	-10.1716	2.65398e-24	3.5758e-23
KLHDC3	624.101	0.748288	0.0735733	10.1706	2.68117e-24	3.60951e-23
EXOSC10	489.883	-0.878438	0.0864641	-10.1596	3.00401e-24	4.03762e-23
CASP4	2108.25	0.424997	0.0418389	10.1579	3.05479e-24	4.10256e-23
DYNLL2	414.597	-0.937401	0.0922965	-10.1564	3.1028e-24	4.1637e-23
SP3	929.513	-0.608245	0.059927	-10.1498	3.32198e-24	4.45423e-23
LRRC58	1077.61	-0.567245	0.0559264	-10.1427	3.57042e-24	4.78351e-23
PIKFYVE	778.901	-0.660958	0.0651822	-10.1402	3.66478e-24	4.90599e-23
KPNA4	1280.67	-0.546373	0.0538859	-10.1395	3.69147e-24	4.93775e-23
NOP10	1159.27	0.536482	0.0529111	10.1393	3.69668e-24	4.94076e-23
WDR43	920.101	-0.607229	0.0599553	-10.128	4.14893e-24	5.54076e-23
MRPL34	1018.9	0.579781	0.0572643	10.1247	4.29499e-24	5.73123e-23
AFF4	827.696	-0.710172	0.0701494	-10.1237	4.33675e-24	5.78233e-23
SOD1	2389.05	0.379526	0.0374928	10.1226	4.38519e-24	5.84224e-23
TYROBP	869.754	0.647281	0.0639771	10.1174	4.62576e-24	6.15783e-23
HADHB	1304.1	0.511221	0.0505529	10.1126	4.85816e-24	6.45691e-23
TERF2IP	1710.57	-0.448076	0.0443103	-10.1122	4.87603e-24	6.47549e-23
SF3B2	2084.44	-0.411069	0.0406572	-10.1106	4.95747e-24	6.57841e-23
ING4	776.467	0.688505	0.0681603	10.1013	5.45367e-24	7.2311e-23
BTAF1	352.557	-1.03626	0.102658	-10.0943	5.85185e-24	7.75288e-23
CHD6	952.096	-0.614068	0.0609039	-10.0826	6.59752e-24	8.73386e-23
KLHL24	927.244	-0.610505	0.0606054	-10.0734	7.23983e-24	9.57655e-23
SOS1	515.271	-0.809471	0.0804749	-10.0587	8.41187e-24	1.11181e-22
FAM133B	1509.8	-0.489579	0.0486952	-10.0539	8.82608e-24	1.16471e-22
ECPAS	435.147	-0.894331	0.0889528	-10.054	8.82213e-24	1.16471e-22
RBM39	5124.88	-0.264429	0.026316	-10.0482	9.35356e-24	1.23334e-22
RNF167	623.94	0.734626	0.0731857	10.0378	1.03927e-23	1.36819e-22
PTTG1IP	906.079	-0.630726	0.0628577	-10.0342	1.07833e-23	1.41737e-22
XPO7	528.025	-0.867685	0.0865409	-10.0263	1.16818e-23	1.53428e-22
SCP2	1389.73	0.498086	0.0496851	10.0249	1.18534e-23	1.55418e-22
YTHDC2	449.32	-0.871589	0.0869432	-10.0248	1.18591e-23	1.55418e-22
SIN3A	821.275	-0.647486	0.0645885	-10.0248	1.18613e-23	1.55418e-22
EIF3D	4050.51	0.297996	0.0297299	10.0234	1.20262e-23	1.57454e-22
LMO4	1762.91	-0.513662	0.051252	-10.0223	1.2165e-23	1.59022e-22
MAP3K4	454.983	-0.861293	0.085947	-10.0212	1.2299e-23	1.60648e-22
SMC4	3708.15	-0.31536	0.0314918	-10.0141	1.32214e-23	1.72561e-22
MECOM	1313.97	-0.497714	0.0497263	-10.0091	1.39067e-23	1.81364e-22
DPP7	1378.59	0.500554	0.0500473	10.0016	1.49936e-23	1.95385e-22
ELF2	1153.65	-0.547361	0.0547464	-9.99812	1.5532e-23	2.02243e-22
CORO1C	547.655	-0.817628	0.0817852	-9.99725	1.56681e-23	2.03857e-22
ZC3H18	664.7	-0.732939	0.0733268	-9.99551	1.59459e-23	2.07309e-22
EIF4G3	536.395	-0.834786	0.0835516	-9.99126	1.66456e-23	2.16238e-22
ZNF326	1325.53	-0.52391	0.0524438	-9.98993	1.68694e-23	2.18974e-22
CSK	739.846	0.671893	0.067381	9.97156	2.03014e-23	2.62909e-22
ADD1	1014.26	-0.57895	0.0581002	-9.96469	2.17541e-23	2.81504e-22
MRE11	889.2	-0.602137	0.0604354	-9.96332	2.20577e-23	2.85212e-22
AKR1B1	526.591	0.813062	0.0817475	9.94602	2.62464e-23	3.39109e-22
TBC1D5	789.164	-0.642315	0.0645941	-9.94385	2.68242e-23	3.46306e-22
FOXO3	647.951	-0.715961	0.0720435	-9.93789	2.848e-23	3.66831e-22
DERA	476.969	0.822486	0.0828616	9.92601	3.20823e-23	4.12593e-22
DCTN1	391.336	-0.954365	0.0961487	-9.92593	3.21084e-23	4.12611e-22
PRPF40A	2582.17	-0.37563	0.0378494	-9.92434	3.26238e-23	4.18911e-22
NDUFC2	1400.48	0.477232	0.0481497	9.91142	3.71342e-23	4.76094e-22
LUZP1	659.397	-0.72887	0.0735511	-9.90971	3.77728e-23	4.8391e-22
CREBRF	951.077	-0.595027	0.0600874	-9.90269	4.05217e-23	5.1833e-22
CAPN1	995.95	0.598709	0.0604996	9.89608	4.329e-23	5.52893e-22
LPIN2	612.422	-0.755155	0.0763709	-9.88799	4.69379e-23	5.99024e-22
CD96	3218.42	-0.341509	0.0345492	-9.88472	4.84935e-23	6.18404e-22
PTPN1	458.089	-0.850347	0.0864661	-9.83445	8.00009e-23	1.01709e-21
PPM1B	749.151	-0.71019	0.0722482	-9.82986	8.37366e-23	1.06377e-21
ZDHHC20	449.631	-0.907433	0.0924436	-9.81607	9.60154e-23	1.21883e-21
PLXDC2	797.311	-0.6806	0.0693657	-9.81177	1.00194e-22	1.26993e-21
ICE1	440.896	-0.864533	0.0881327	-9.80944	1.02532e-22	1.29759e-21
UQCRB	6910.54	0.227409	0.0231861	9.808	1.0401e-22	1.31431e-21
EVL	760.068	0.648892	0.0661593	9.80803	1.03974e-22	1.31431e-21
ZNF506	431.265	-0.900807	0.0918535	-9.80699	1.05055e-22	1.32651e-21
ADAM10	819.076	-0.644564	0.0657711	-9.80011	1.1246e-22	1.41787e-21
RERE	420.204	-0.878427	0.0897705	-9.78526	1.30266e-22	1.64112e-21
NAMPT	485.157	-0.830518	0.0848785	-9.78478	1.30873e-22	1.64752e-21
PTPMT1	398.269	0.90387	0.0924878	9.77285	1.47251e-22	1.8523e-21
ABCF1	745.23	-0.65147	0.0666637	-9.77249	1.47779e-22	1.85754e-21
ALDOA	318.056	1.0716	0.109665	9.77158	1.49104e-22	1.87279e-21
ASAP1	313.452	-1.10927	0.113562	-9.76801	1.54463e-22	1.93864e-21
USP47	903.04	-0.603309	0.06178	-9.76544	1.58424e-22	1.98686e-21
MED13	859.164	-0.624052	0.0639257	-9.76213	1.63676e-22	2.04964e-21
XBP1	1935.77	0.431277	0.0441815	9.76147	1.64742e-22	2.06144e-21
MGAT2	478.26	0.876663	0.0898315	9.75897	1.68863e-22	2.11142e-21
IL2RG	1265.15	0.492706	0.0504889	9.75869	1.69336e-22	2.11574e-21
PPP3R1	507.1	-0.80121	0.0821372	-9.75454	1.76404e-22	2.20241e-21
TMCO3	577.647	-0.74412	0.0763676	-9.74392	1.95844e-22	2.44329e-21
URI1	1621.3	-0.43786	0.0449403	-9.74314	1.97355e-22	2.4603e-21
ARHGAP21	337.087	-0.999904	0.102705	-9.73565	2.12447e-22	2.64646e-21
TPI1	3320.17	0.316186	0.0324781	9.73536	2.1306e-22	2.65212e-21
RAD23B	1072.95	-0.547281	0.0562951	-9.72164	2.4383e-22	3.03287e-21
KIF15	411.608	-0.969418	0.0997572	-9.71777	2.5326e-22	3.14547e-21
AZIN1	739.296	-0.66125	0.0680561	-9.71625	2.57077e-22	3.19051e-21
THAP11	347.197	0.980189	0.10089	9.71542	2.59173e-22	3.21413e-21
STRN	352.954	-0.954386	0.0982582	-9.71304	2.65294e-22	3.28759e-21
GRAMD1A	694.868	0.68209	0.0703018	9.70231	2.94755e-22	3.64997e-21
AHSA1	854.814	0.610024	0.0629146	9.69606	3.13354e-22	3.87453e-21
QSER1	482.843	-0.831258	0.0857862	-9.68988	3.32913e-22	4.11332e-21
RER1	844.738	0.618893	0.0639549	9.67702	3.77549e-22	4.65793e-21
NAA20	662.199	0.695244	0.0718541	9.67578	3.82175e-22	4.71152e-21
SNX20	336.475	0.990387	0.10238	9.67364	3.9025e-22	4.80751e-21
PSMB8	1454.15	0.460635	0.047628	9.67153	3.9836e-22	4.9038e-21
MDH2	1797.36	0.409697	0.042399	9.6629	4.33403e-22	5.33124e-21
SELENOF	1766.49	0.424401	0.0439303	9.66077	4.42514e-22	5.43931e-21
CLEC2B	1898.85	-0.431727	0.0447011	-9.65807	4.54326e-22	5.58038e-21
CEP83	440.318	-0.861986	0.0892564	-9.65741	4.57294e-22	5.6127e-21
TRIM58	673.214	-0.689922	0.0714846	-9.65134	4.8516e-22	5.94598e-21
MRPL32	485.018	0.795916	0.0824887	9.64879	4.97377e-22	6.09122e-21
TRPM7	658.043	-0.693913	0.0720048	-9.63704	5.5771e-22	6.82509e-21
CNPY3	1590.54	0.446475	0.0463569	9.63126	5.9004e-22	7.21545e-21
CGGBP1	1445.2	-0.478295	0.049688	-9.62596	6.21252e-22	7.58601e-21
RNF213	1016.48	-0.565192	0.0587325	-9.62315	6.3845e-22	7.7903e-21
HERC2	1040.69	-0.549256	0.0570841	-9.62187	6.46428e-22	7.88189e-21
FUT7	339.53	0.951323	0.0989025	9.6188	6.66026e-22	8.11492e-21
EPS15	1018.23	-0.575095	0.0598087	-9.61557	6.87283e-22	8.3678e-21
DDX27	997.054	-0.587816	0.0611535	-9.61214	7.10598e-22	8.64535e-21
BEX4	1293.08	0.478939	0.0498478	9.60803	7.39509e-22	8.99053e-21
MAP3K2	1023.24	-0.570408	0.0593991	-9.60297	7.76734e-22	9.42935e-21
SMIM26	2191.34	0.396397	0.0413016	9.5976	8.18305e-22	9.92679e-21
RPN2	1954.11	0.419712	0.0438586	9.56966	1.07255e-21	1.30016e-20
AHSP	3530.08	-3.12138	0.3262	-9.56891	1.08034e-21	1.30865e-20
DYNLRB1	1400.77	0.469643	0.0490876	9.56744	1.09583e-21	1.32645e-20
NUP214	804.451	-0.629985	0.0658584	-9.56575	1.11396e-21	1.34741e-20
SFSWAP	864.228	-0.606663	0.0634524	-9.56091	1.16721e-21	1.4108e-20
SPCS3	1283.28	-0.497523	0.0520521	-9.55817	1.19861e-21	1.44771e-20
DNAJC9	1044.08	-0.585578	0.0612658	-9.55798	1.20076e-21	1.44925e-20
AL135925.1	511.31	0.773633	0.0809683	9.55476	1.23867e-21	1.49392e-20
MLLT6	460.188	-0.835118	0.087451	-9.54956	1.30254e-21	1.56869e-20
SMCO4	360.249	0.933202	0.0977678	9.54508	1.36e-21	1.63642e-20
CCNK	567.702	-0.734657	0.0769675	-9.54503	1.36074e-21	1.63642e-20
MAN1A2	1053.15	-0.555835	0.0582608	-9.54045	1.42218e-21	1.70907e-20
RPL36	34176.2	0.106014	0.0111248	9.52954	1.57982e-21	1.89578e-20
RAN	4583.72	0.288225	0.0302606	9.52476	1.65416e-21	1.98215e-20
TAPT1	602.649	-0.76448	0.0803332	-9.51637	1.79331e-21	2.1458e-20
CNPY2	793.453	0.607687	0.0638755	9.51362	1.84132e-21	2.20167e-20
CYBC1	672.186	0.698496	0.0734507	9.50973	1.91161e-21	2.28408e-20
RPS10	8316.98	-0.193453	0.0203764	-9.49395	2.22443e-21	2.65214e-20
ADGRE5	1273.57	-0.504265	0.053125	-9.49204	2.26564e-21	2.69935e-20
JAGN1	771.749	0.617542	0.0650877	9.48784	2.35866e-21	2.80616e-20
TPST2	604.607	0.744786	0.0785544	9.48115	2.51504e-21	2.98796e-20
GIMAP2	478.295	0.788219	0.0831383	9.48082	2.52295e-21	2.99521e-20
TTC9C	365.476	0.934474	0.0985689	9.48041	2.53279e-21	3.00476e-20
AAK1	826.441	-0.598774	0.063167	-9.47921	2.5621e-21	3.03737e-20
AKAP11	464.29	-0.827393	0.0872876	-9.47892	2.56923e-21	3.04366e-20
ANKRD36	834.146	-0.61227	0.0646313	-9.47328	2.71182e-21	3.2103e-20
TCF4	1254.81	0.499559	0.052735	9.47301	2.71893e-21	3.21644e-20
CALR	6124.53	-0.223876	0.0236818	-9.4535	3.27678e-21	3.86813e-20
UHMK1	697.38	-0.660053	0.0698451	-9.45024	3.38066e-21	3.98511e-20
ATF6	654.105	-0.708081	0.0750089	-9.43997	3.72888e-21	4.3925e-20
UGGT1	485.296	-0.809933	0.0858538	-9.43386	3.95266e-21	4.65281e-20
PPP1R12B	358.917	-0.938124	0.0994437	-9.43372	3.95794e-21	4.65574e-20
SEC63	951.304	-0.572797	0.0607333	-9.43135	4.04836e-21	4.75317e-20
CSPP1	424.093	-0.842911	0.0893735	-9.43133	4.04932e-21	4.75317e-20
PPP1R12A	2260.62	-0.382155	0.0405368	-9.42736	4.20532e-21	4.92936e-20
TUFM	1914.23	0.394906	0.0418963	9.4258	4.26837e-21	4.99624e-20
ERG28	454.082	0.804123	0.0853275	9.42397	4.34346e-21	5.08056e-20
CHD9	2649.48	-0.35409	0.0375831	-9.42152	4.44605e-21	5.19693e-20
ANKRD17	1019.89	-0.540484	0.0574247	-9.41205	4.86572e-21	5.67951e-20
LSM2	1806.4	0.399553	0.0424615	9.40978	4.97154e-21	5.79897e-20
PSMB9	949.361	0.588684	0.0626262	9.39997	5.45791e-21	6.35736e-20
CD63	3411.86	0.303996	0.0323403	9.3999	5.46169e-21	6.35736e-20
LAX1	572.28	-0.738153	0.0786526	-9.38498	6.29289e-21	7.31976e-20
HLA-DMA	1071.51	0.514614	0.0548394	9.38402	6.35044e-21	7.38156e-20
HEMGN	1391.36	-1.80533	0.192403	-9.38305	6.40885e-21	7.44426e-20
ZNF445	1043.96	-0.527794	0.0562675	-9.38007	6.59264e-21	7.65241e-20
BRWD3	437.25	-0.839019	0.0894839	-9.3762	6.83905e-21	7.93291e-20
DTL	591.891	-0.739211	0.0789433	-9.36381	7.69095e-21	8.91488e-20
GOLGA3	462.513	-0.795165	0.0849481	-9.3606	7.92832e-21	9.18364e-20
LSM6	900.902	0.569602	0.0608864	9.35516	8.34748e-21	9.66245e-20
SPAST	387.563	-0.945425	0.101161	-9.34578	9.12185e-21	1.05515e-19
SRPK1	826.406	-0.62596	0.0669946	-9.34344	9.3258e-21	1.07799e-19
DDX11	648.291	-0.744287	0.0796643	-9.34278	9.38337e-21	1.0839e-19
FYTTD1	816.31	-0.603166	0.0645607	-9.34263	9.39741e-21	1.08477e-19
CPLANE1	486.472	-0.772073	0.0827165	-9.33397	1.01976e-20	1.17632e-19
SBDS	412.409	-0.837859	0.0897735	-9.33303	1.02883e-20	1.18596e-19
DICER1	1522.47	-0.442178	0.0473923	-9.33016	1.05707e-20	1.21768e-19
ADIPOR2	428.543	-0.836838	0.0897219	-9.32702	1.08892e-20	1.2535e-19
C18orf25	441.892	-0.842333	0.0903699	-9.32095	1.15309e-20	1.32553e-19
CPEB4	321.62	-1.05062	0.112799	-9.31408	1.23011e-20	1.4131e-19
PPP1R35	686.069	0.635092	0.0681928	9.31319	1.24047e-20	1.42402e-19
NCOA7	457.672	-0.82292	0.0884402	-9.30481	1.34227e-20	1.53983e-19
PDCD6	1599.6	0.427568	0.0459814	9.29872	1.42141e-20	1.62949e-19
ATM	613.646	-0.688911	0.0740917	-9.29808	1.43e-20	1.63821e-19
UBB	9560.3	-0.182915	0.0196752	-9.29674	1.44812e-20	1.65784e-19
LSM14A	1283.79	-0.474604	0.0510682	-9.29354	1.49242e-20	1.70737e-19
MGMT	686.763	0.649944	0.0699503	9.29151	1.52109e-20	1.73898e-19
MRPS36	927.319	0.549356	0.0591288	9.29084	1.53082e-20	1.74891e-19
SATB1	1345.16	-0.491594	0.0530051	-9.27447	1.78499e-20	2.0365e-19
TOPORS	1156.85	-0.504342	0.0543952	-9.27182	1.83003e-20	2.08646e-19
SACS	313.355	-0.984776	0.106284	-9.26552	1.94137e-20	2.21038e-19
PIP4K2A	849.118	-0.604072	0.0652005	-9.26484	1.95372e-20	2.22292e-19
MAP4K5	685.062	-0.68193	0.0736262	-9.26206	2.00528e-20	2.27848e-19
TMEM179B	723.831	0.653385	0.0706159	9.25265	2.1899e-20	2.48656e-19
ARPC1A	398.479	0.859729	0.0929214	9.25222	2.19871e-20	2.49486e-19
EVI2B	2044.38	0.380299	0.0411142	9.24982	2.24862e-20	2.54976e-19
CNOT6L	1082.87	-0.510567	0.0552044	-9.24867	2.27312e-20	2.57579e-19
EPHB6	940.158	-0.568175	0.0614504	-9.24607	2.32897e-20	2.63729e-19
PRDX2	1632.39	-3.03867	0.32877	-9.24253	2.40744e-20	2.72429e-19
TXNDC9	358.5	0.902277	0.0976521	9.23971	2.47173e-20	2.79515e-19
DCUN1D1	610.865	-0.708517	0.0767066	-9.23672	2.54178e-20	2.87241e-19
EFHD2	842.515	-0.574093	0.0621837	-9.23221	2.65115e-20	2.99398e-19
NIFK-AS1	398.549	0.879493	0.0952926	9.22939	2.72174e-20	3.07163e-19
MTIF3	823.299	0.575148	0.062334	9.22687	2.78647e-20	3.14043e-19
DENR	1395.23	-0.461836	0.050056	-9.22638	2.79939e-20	3.15285e-19
UVRAG	433.844	-0.853117	0.092471	-9.22577	2.81521e-20	3.16853e-19
ACAP1	1732.33	0.397035	0.0430735	9.21761	3.03799e-20	3.41697e-19
CFLAR	1231.78	-0.476301	0.0516914	-9.21431	3.13292e-20	3.52137e-19
CBX3	2704.19	-0.328494	0.0357272	-9.19449	3.76762e-20	4.22907e-19
RPN1	641.215	-0.679328	0.073894	-9.19328	3.81046e-20	4.27428e-19
ARIH1	579.067	-0.753178	0.0819677	-9.18873	3.97519e-20	4.45606e-19
VPS13B	448.666	-0.798496	0.0869651	-9.1818	4.2395e-20	4.74915e-19
MYB	2763.19	-0.329646	0.0359144	-9.17867	4.36456e-20	4.88596e-19
SELENOT	775.728	0.595682	0.0650222	9.1612	5.13231e-20	5.73389e-19
RFX7	407.933	-0.857263	0.093597	-9.15909	5.23391e-20	5.84348e-19
ZBTB44	1590.28	-0.418829	0.045737	-9.15734	5.31935e-20	5.9349e-19
GPBP1	1959.86	-0.418449	0.0457074	-9.15496	5.43784e-20	6.06305e-19
GPSM3	1071.34	0.51185	0.0559265	9.1522	5.5787e-20	6.21594e-19
ERLIN1	803.515	-0.596741	0.0652178	-9.14996	5.69542e-20	6.34176e-19
TMX4	1453.53	-0.434259	0.0474654	-9.14897	5.74769e-20	6.3957e-19
TIMM9	936.401	0.567917	0.062109	9.14389	6.02477e-20	6.69954e-19
PHF10	591.33	-0.701216	0.0768387	-9.12582	7.11934e-20	7.90091e-19
SSFA2	656.963	-0.666426	0.0730651	-9.12099	7.44444e-20	8.25621e-19
DCAF16	659.006	-0.640235	0.0703175	-9.10492	8.63322e-20	9.56825e-19
MAPKAP1	400.451	-0.840074	0.0922824	-9.10329	8.76333e-20	9.706e-19
CCDC125	419.454	-0.816503	0.0897359	-9.09896	9.12049e-20	1.00949e-18
USP25	356.634	-0.881219	0.0969125	-9.09294	9.64007e-20	1.06558e-18
PHF6	693.483	-0.633133	0.0696321	-9.09255	9.67459e-20	1.06869e-18
NDUFAF3	872.706	0.57654	0.0634214	9.09061	9.84819e-20	1.08715e-18
RSF1	1730.9	-0.399231	0.0439339	-9.08708	1.01734e-19	1.12156e-18
RAB13	437.656	-0.796192	0.0876564	-9.08311	1.0552e-19	1.16253e-18
NUPL2	460.5	0.789851	0.0869847	9.08035	1.08226e-19	1.19155e-18
BTG3	723.666	-0.615976	0.0678478	-9.07879	1.0979e-19	1.20798e-18
DUSP10	760.727	-0.59211	0.0652245	-9.07803	1.10553e-19	1.21557e-18
ZFAND5	1145.76	-0.494228	0.0544858	-9.07078	1.18167e-19	1.29844e-18
CPSF2	566.628	-0.708212	0.0780952	-9.06857	1.20588e-19	1.32417e-18
VPS35	1453.01	-0.428849	0.0472925	-9.06801	1.21212e-19	1.33015e-18
TAGLN2	5012.67	0.244393	0.0269728	9.06069	1.29623e-19	1.41964e-18
PSMA5	1455.69	0.432494	0.0477506	9.05736	1.33646e-19	1.46274e-18
NCOA2	616.698	-0.670154	0.0740163	-9.05414	1.37643e-19	1.5055e-18
REEP3	499.022	0.770534	0.0852668	9.03674	1.61415e-19	1.76089e-18
AGPS	537.369	-0.715015	0.0791339	-9.03551	1.63238e-19	1.77845e-18
MYO9B	1018.33	-0.510322	0.0564981	-9.03254	1.67729e-19	1.82619e-18
ERAP1	529.334	-0.734404	0.0813154	-9.03156	1.69248e-19	1.84152e-18
EIF2AK4	812.595	-0.593166	0.065678	-9.03143	1.69445e-19	1.84247e-18
MARK3	856.178	-0.568968	0.0630282	-9.0272	1.76126e-19	1.91387e-18
SDHAF1	320.683	0.925211	0.102515	9.02515	1.79454e-19	1.94876e-18
SNAPIN	344.419	0.914877	0.101381	9.02413	1.81125e-19	1.96562e-18
JARID2	1991.7	-0.379683	0.0421191	-9.01451	1.97753e-19	2.14329e-18
SWAP70	771.258	-0.5929	0.0657944	-9.0114	2.03449e-19	2.20216e-18
EEA1	666.718	-0.650375	0.0722281	-9.00445	2.16751e-19	2.34159e-18
RAB5C	902.688	0.537895	0.0597596	9.00098	2.23704e-19	2.41357e-18
FBXO11	667.54	-0.64409	0.071593	-8.99656	2.32909e-19	2.50964e-18
RPRD2	504.864	-0.777606	0.0864711	-8.99267	2.41288e-19	2.59824e-18
MDM4	2040.08	-0.361757	0.0402367	-8.99071	2.45643e-19	2.64343e-18
ALMS1	318.434	-0.934427	0.103985	-8.98614	2.56062e-19	2.75201e-18
SAMD9	710.237	-0.646912	0.0720335	-8.98071	2.69028e-19	2.88949e-18
ECH1	1026.84	0.507891	0.0566133	8.97123	2.93229e-19	3.1474e-18
GMPR2	1038.87	0.501436	0.055898	8.97055	2.9505e-19	3.16491e-18
CELF2	3410.71	-0.283131	0.0315736	-8.96735	3.03741e-19	3.25604e-18
RHOQ	399.451	-0.827163	0.0922644	-8.96514	3.09888e-19	3.31817e-18
KIAA1586	406.528	-0.807299	0.0900668	-8.96334	3.14984e-19	3.37006e-18
ARL11	426.494	0.801194	0.08949	8.95288	3.46311e-19	3.70286e-18
FXR1	2267.02	-0.355574	0.0397233	-8.95127	3.51431e-19	3.7552e-18
HELZ	1029.46	-0.513673	0.0574105	-8.94737	3.64039e-19	3.88744e-18
UQCRC2	1967.92	0.362396	0.0405164	8.94442	3.73892e-19	3.99009e-18
SKIDA1	694.724	-0.637178	0.0712415	-8.94392	3.75617e-19	4.00082e-18
THAP7	403.167	0.810924	0.0907673	8.9341	4.10494e-19	4.36953e-18
LYST	506.56	-0.730723	0.0818302	-8.92974	4.27009e-19	4.54242e-18
MAPRE1	831.874	-0.566184	0.0634456	-8.92393	4.50024e-19	4.78114e-18
CNST	966.497	-0.534398	0.0598854	-8.92367	4.51075e-19	4.78926e-18
BRD7	1442.39	-0.439647	0.0492744	-8.92244	4.56142e-19	4.83691e-18
NCBP1	329.705	-0.92353	0.10358	-8.91612	4.82896e-19	5.11085e-18
ELMSAN1	626.603	-0.67301	0.0755836	-8.90418	5.37837e-19	5.68153e-18
TRANK1	387.64	-0.824461	0.0926132	-8.9022	5.4752e-19	5.78014e-18
USP33	691.959	-0.628991	0.0707043	-8.89607	5.78588e-19	6.10427e-18
OGT	2006.94	-0.358996	0.0403556	-8.89582	5.79914e-19	6.11439e-18
DMXL2	322.824	-0.923075	0.103856	-8.88806	6.21852e-19	6.54829e-18
FAM76B	643.654	-0.636961	0.0717114	-8.88229	6.54962e-19	6.88825e-18
NCF4	1758.27	0.378715	0.0426369	8.88234	6.54712e-19	6.88825e-18
MRPL10	388.902	0.829897	0.0938084	8.84672	9.01264e-19	9.44882e-18
KNL1	448.482	-0.812332	0.0918354	-8.84552	9.11038e-19	9.5453e-18
CKB	310.512	0.915377	0.103548	8.8401	9.56317e-19	1.00134e-17
IAH1	740.792	0.619997	0.0701483	8.83837	9.71241e-19	1.01633e-17
PA2G4	2996.62	-0.302591	0.0342557	-8.83329	1.01643e-18	1.06295e-17
PRRC2B	1028.76	-0.503494	0.0570251	-8.82934	1.05298e-18	1.10048e-17
LSG1	455.561	-0.758947	0.085986	-8.8264	1.08095e-18	1.12831e-17
MATR3-1	380.26	-0.856216	0.0970473	-8.82267	1.11765e-18	1.16588e-17
SLAIN2	429.536	-0.81884	0.0928314	-8.82072	1.13726e-18	1.18559e-17
CYFIP2	731.1	-0.599281	0.0679428	-8.82038	1.14074e-18	1.18847e-17
NOP58	1665.12	-0.411675	0.0466866	-8.81784	1.1669e-18	1.21498e-17
PURB	652.739	-0.6616	0.0750549	-8.81488	1.19815e-18	1.24673e-17
CEP128	359.326	-0.940245	0.106805	-8.80335	1.32796e-18	1.38009e-17
FANCL	678.279	0.605376	0.0687866	8.80079	1.35858e-18	1.41103e-17
BTN3A2	633.989	0.630484	0.0716933	8.79418	1.44091e-18	1.49561e-17
FAM96B	1001.81	0.514709	0.0585801	8.78642	1.54407e-18	1.60069e-17
PRDM8	505.466	0.713543	0.081284	8.7784	1.65814e-18	1.71681e-17
GNG5	2889.03	0.326694	0.0372277	8.77555	1.70072e-18	1.7575e-17
C16orf72	611.632	-0.660537	0.0752707	-8.77549	1.70166e-18	1.7575e-17
ZNF609	1060.9	-0.530106	0.0604182	-8.77395	1.72511e-18	1.78062e-17
CALCOCO2	1181.78	-0.481648	0.0549104	-8.77153	1.76248e-18	1.81807e-17
LBH	406.776	-0.825416	0.0942033	-8.76206	1.9171e-18	1.97512e-17
RAD18	414.767	-0.827528	0.0945163	-8.7554	2.0338e-18	2.09407e-17
UBAC2	598.081	0.645667	0.0738478	8.74322	2.26568e-18	2.3285e-17
INO80	427.095	-0.772203	0.0883768	-8.73762	2.38082e-18	2.44533e-17
NCOR1	2016.96	-0.377931	0.0432852	-8.73119	2.52001e-18	2.58351e-17
MBOAT2	314.862	-0.90572	0.103772	-8.72799	2.59237e-18	2.65443e-17
PSMD1	823.005	-0.562215	0.0644644	-8.72133	2.74948e-18	2.81358e-17
GRIPAP1	521.782	-0.701434	0.0804431	-8.71962	2.79126e-18	2.85458e-17
ZNF92	477.791	-0.73385	0.0841823	-8.71739	2.84693e-18	2.90973e-17
SMIM19	883.609	0.538213	0.0617485	8.71621	2.87669e-18	2.93835e-17
SOCS4	365.528	-0.828022	0.095053	-8.71116	3.00774e-18	3.07032e-17
HEXA	862.086	0.552429	0.0634198	8.71068	3.02047e-18	3.08143e-17
KDM3A	382.874	-0.903931	0.103774	-8.71061	3.02247e-18	3.08159e-17
SDF2	498.591	0.759621	0.0872333	8.70793	3.09482e-18	3.15342e-17
ADPGK	1089.28	-0.493699	0.0567064	-8.70622	3.1417e-18	3.19924e-17
RBM25	3771.55	-0.264549	0.0303874	-8.70588	3.15131e-18	3.20707e-17
UBAP2L	542.872	-0.680674	0.0781887	-8.70552	3.16118e-18	3.2132e-17
GLYR1	619.137	-0.652774	0.0749838	-8.70553	3.16106e-18	3.2132e-17
TET3	334.435	-0.898874	0.103306	-8.70108	3.28729e-18	3.33731e-17
AKR7A2	861.061	0.558144	0.0642137	8.69198	3.56178e-18	3.61158e-17
FAM13B	772.081	-0.57892	0.0667445	-8.67367	4.18396e-18	4.23988e-17
AGFG1	456.748	-0.754091	0.086947	-8.673	4.20878e-18	4.26244e-17
SCAMP2	1223.78	0.453745	0.0523389	8.66937	4.34527e-18	4.398e-17
BRK1	2006.05	0.352196	0.0406487	8.6644	4.53895e-18	4.5868e-17
CBX1	585.657	-0.671682	0.0775222	-8.66437	4.54006e-18	4.5868e-17
GPATCH8	1002.89	-0.49417	0.05706	-8.66053	4.6956e-18	4.73821e-17
FCER1A	1033.3	-1.12291	0.129719	-8.65644	4.8674e-18	4.90563e-17
DCP2	950.541	-0.534142	0.0617147	-8.65502	4.92821e-18	4.96392e-17
ATP9B	448.96	-0.76694	0.0887137	-8.64511	5.37524e-18	5.41092e-17
SLC25A11	832.293	0.538359	0.0622935	8.64231	5.50879e-18	5.54202e-17
PPCS	842.201	0.54799	0.0634239	8.64013	5.61506e-18	5.64389e-17
LARP1	1700.19	-0.394614	0.0456724	-8.64009	5.61682e-18	5.64389e-17
RAB8A	1535.32	-0.403008	0.0466806	-8.6333	5.96092e-18	5.98604e-17
DNAJC10	577.476	-0.666235	0.0771904	-8.63106	6.07874e-18	6.09702e-17
PRIM1	961.066	-0.538188	0.0624911	-8.61224	7.16459e-18	7.18181e-17
HNRNPH3	2323.34	-0.324453	0.0376848	-8.60964	7.32877e-18	7.33756e-17
SPCS1	2260.69	0.332285	0.0385977	8.60893	7.37438e-18	7.3788e-17
SPNS2	354.888	0.838746	0.0975613	8.59712	8.17449e-18	8.1647e-17
STAM	350.832	-0.855804	0.099576	-8.59449	8.36385e-18	8.34384e-17
FADS1	950.397	-0.520964	0.0606297	-8.59255	8.50581e-18	8.48039e-17
TMED10	1033.63	-0.487601	0.056764	-8.58996	8.69994e-18	8.66876e-17
C3AR1	494.166	-0.7331	0.0853608	-8.58825	8.83028e-18	8.79338e-17
SNX6	1081.46	-0.488352	0.0568926	-8.58376	9.1825e-18	9.13867e-17
DENND4A	360.259	-0.851624	0.0992498	-8.58062	9.43653e-18	9.38589e-17
KIDINS220	816.038	-0.553484	0.0645054	-8.58043	9.45203e-18	9.3957e-17
ZMAT2	1025.68	-0.483549	0.0563592	-8.57976	9.50705e-18	9.43915e-17
DOK1	374.628	0.803837	0.0937744	8.57203	1.01679e-17	1.00833e-16
ANKRD10	1193.07	0.468653	0.0546883	8.56954	1.03902e-17	1.02931e-16
GPATCH2L	1224.37	-0.463031	0.0540324	-8.56952	1.03918e-17	1.02931e-16
SCOC	348.741	-0.840129	0.0980529	-8.56812	1.05192e-17	1.0413e-16
UBA7	607.371	0.643649	0.0751339	8.5667	1.0649e-17	1.05353e-16
CA1	1616.28	-1.96907	0.229893	-8.56515	1.07935e-17	1.0672e-16
HIST1H2AC	884.413	0.524609	0.0612848	8.56019	1.12686e-17	1.1135e-16
OTUD4	536.302	-0.682018	0.0797036	-8.55693	1.15917e-17	1.14408e-16
UBE2L6	983.916	0.498094	0.0582138	8.55628	1.16563e-17	1.14978e-16
TCERG1	1075.51	-0.476751	0.0557441	-8.5525	1.20453e-17	1.18744e-16
DEAF1	762.799	0.559069	0.0653858	8.55031	1.22762e-17	1.20949e-16
PPIL3	375.492	0.799596	0.0935535	8.54694	1.26396e-17	1.24456e-16
BRWD1	1012.42	-0.509455	0.0596096	-8.54653	1.26841e-17	1.24821e-16
THOC2	1707.55	-0.41548	0.0486145	-8.54642	1.26966e-17	1.2487e-16
USP38	319.235	-0.913722	0.106926	-8.54539	1.28098e-17	1.25909e-16
STXBP3	879.529	-0.527051	0.0616816	-8.5447	1.28874e-17	1.26597e-16
HK1	419.359	-0.787712	0.0922423	-8.5396	1.34693e-17	1.32235e-16
MKLN1	811.86	-0.557934	0.0653428	-8.53857	1.35896e-17	1.33338e-16
CENPJ	615.682	-0.649751	0.0761121	-8.53676	1.38036e-17	1.35278e-16
ZNF562	479.412	-0.716535	0.0839352	-8.53677	1.38024e-17	1.35278e-16
SMU1	641.714	-0.613743	0.0719294	-8.53258	1.43125e-17	1.40183e-16
HPCAL1	618.18	0.650461	0.0762799	8.5273	1.49806e-17	1.46555e-16
MRPL36	557.453	0.67308	0.0789896	8.52112	1.58024e-17	1.54323e-16
ETS2	913.784	-0.507234	0.0595394	-8.51929	1.60531e-17	1.5668e-16
WDR70	405.96	-0.774289	0.0908982	-8.5182	1.62056e-17	1.58076e-16
SHMT2	812.207	0.562624	0.0660567	8.51729	1.63335e-17	1.5923e-16
SP1	503.474	-0.731703	0.0859501	-8.51311	1.69335e-17	1.64886e-16
DAZAP2	1978.43	-0.365664	0.0429574	-8.51225	1.70589e-17	1.66011e-16
TOMM70	466.716	-0.715093	0.0840589	-8.50705	1.78412e-17	1.73523e-16
NKG7	708.194	0.609501	0.0716979	8.50097	1.88019e-17	1.8276e-16
PPP2CA	899.263	-0.56257	0.0661904	-8.49926	1.90797e-17	1.85352e-16
ZNF708	467.167	-0.731135	0.0860708	-8.49458	1.98656e-17	1.92762e-16
BOD1	339.066	0.870004	0.10245	8.49201	2.03088e-17	1.96834e-16
APEX1	4698.35	0.236026	0.0277961	8.49133	2.04279e-17	1.97873e-16
KDM2A	734.978	-0.59784	0.0704473	-8.48635	2.13235e-17	2.06309e-16
KNTC1	572.726	-0.664635	0.0783242	-8.48569	2.14441e-17	2.07355e-16
COPB1	897.434	-0.55051	0.0648935	-8.48328	2.18939e-17	2.11432e-16
NAA16	422.629	-0.761822	0.0898443	-8.47936	2.26443e-17	2.18076e-16
PPP3CA	1101.71	-0.481679	0.0568353	-8.47499	2.35105e-17	2.26287e-16
S100Z	581.526	0.638491	0.0754144	8.46644	2.5301e-17	2.43239e-16
NDRG1	643.437	-0.612019	0.0722973	-8.46532	2.55457e-17	2.45451e-16
MAPK14	1168.47	-0.469029	0.0554345	-8.46096	2.65188e-17	2.54654e-16
AP1G1	376.754	-0.797884	0.0943161	-8.45968	2.68114e-17	2.57316e-16
ITGB2	1070.9	0.462786	0.0547192	8.45748	2.73227e-17	2.62072e-16
LINC02256	415.503	0.784369	0.0927766	8.45438	2.80572e-17	2.68962e-16
RAB5IF	916.038	0.49994	0.0591622	8.45032	2.90496e-17	2.78315e-16
PSAP	855.683	-0.523284	0.0619428	-8.44786	2.967e-17	2.84097e-16
TTC7A	366.344	-0.805143	0.0953236	-8.44642	3.00379e-17	2.87454e-16
HEATR1	405.358	-0.809404	0.095832	-8.44607	3.01282e-17	2.88152e-16
GOT2	366.938	-0.832823	0.0986246	-8.44437	3.0569e-17	2.92201e-16
TFDP1	914.204	-0.539712	0.0639388	-8.44107	3.14436e-17	3.00217e-16
ADSS	782.652	-0.552826	0.0655213	-8.43734	3.24628e-17	3.09771e-16
FAM208A	796.142	-0.581854	0.0690037	-8.43222	3.39176e-17	3.23283e-16
SMARCA4	1021.11	-0.491667	0.0583869	-8.42084	3.7378e-17	3.55859e-16
MYO9A	381.714	-0.798955	0.0948948	-8.41938	3.78483e-17	3.60131e-16
ANP32A	3171.51	-0.285233	0.033882	-8.41844	3.81519e-17	3.62813e-16
ARID1B	8066.48	-0.18007	0.0213979	-8.41529	3.91926e-17	3.72497e-16
RBL1	485.401	-0.715847	0.0851468	-8.40721	4.19887e-17	3.98618e-16
C21orf58	643.46	-0.69201	0.0823691	-8.40133	4.41457e-17	4.18857e-16
HERC3	334.026	-0.856762	0.102124	-8.38943	4.88518e-17	4.62719e-16
IREB2	921.775	-0.498736	0.0594481	-8.38943	4.88496e-17	4.62719e-16
GPAA1	527.463	0.666318	0.0794683	8.3847	5.08541e-17	4.81411e-16
NFE2	1501.16	0.396792	0.0473307	8.38339	5.14232e-17	4.86523e-16
SNRNP40	690.289	0.577405	0.0689077	8.3794	5.31962e-17	5.03012e-16
FDFT1	1291.83	0.42331	0.0505801	8.3691	5.80597e-17	5.48689e-16
HCFC1	580.818	-0.654173	0.0782229	-8.36294	6.11762e-17	5.77813e-16
CLSTN1	427.251	-0.743943	0.08896	-8.36267	6.13153e-17	5.788e-16
PPP1CB	1765.77	-0.358832	0.042924	-8.35971	6.28743e-17	5.93181e-16
WIPF1	1107.97	-0.465315	0.0556734	-8.35793	6.38281e-17	6.01838e-16
POLE	538.197	-0.686435	0.0821765	-8.35318	6.64498e-17	6.25933e-16
MRPL51	1662.9	0.366462	0.0438764	8.35214	6.70394e-17	6.30692e-16
IPO8	325.271	-0.851781	0.101997	-8.35108	6.76444e-17	6.36025e-16
ARIH2	673.155	-0.589097	0.0705631	-8.34852	6.91258e-17	6.49588e-16
LY6E	1328.62	0.410252	0.0491862	8.34079	7.37955e-17	6.93079e-16
SOD2	468.726	-0.705684	0.0846342	-8.33804	7.55301e-17	7.08573e-16
POLR1D	3120.07	0.277304	0.0332826	8.3318	7.96207e-17	7.4569e-16
SMARCD1	418.85	-0.767073	0.0920915	-8.32946	8.12121e-17	7.59741e-16
MRPS6	526.277	0.665673	0.0799225	8.32898	8.15447e-17	7.62425e-16
PCLAF	5599.68	0.234566	0.0281633	8.32878	8.16782e-17	7.63245e-16
PUM1	1271.44	-0.422759	0.0507673	-8.32737	8.26553e-17	7.71943e-16
DLGAP5	362.257	-0.929183	0.11159	-8.32678	8.30691e-17	7.75374e-16
RAB8B	329.18	-0.843189	0.101265	-8.3266	8.31983e-17	7.76145e-16
TFPI	729.99	-0.556927	0.0669105	-8.32347	8.54266e-17	7.96487e-16
EMC6	688.528	0.570383	0.0685452	8.32126	8.70307e-17	8.1099e-16
C8orf33	436.713	-0.723949	0.0870064	-8.32064	8.74891e-17	8.14807e-16
MCM6	1171.68	-0.452251	0.0543651	-8.31877	8.88776e-17	8.27276e-16
COL4A5	897.861	-0.536259	0.0644643	-8.3187	8.89335e-17	8.27334e-16
MGA	812.089	-0.526718	0.0633238	-8.31786	8.95632e-17	8.32728e-16
PAK1	363.134	-0.803079	0.0965602	-8.31687	9.03152e-17	8.39252e-16
CHML	464.812	-0.730769	0.0878872	-8.31485	9.18687e-17	8.52737e-16
LUC7L	655.961	-0.596145	0.0717251	-8.31154	9.447e-17	8.76396e-16
XAF1	1071.33	-0.477236	0.0574298	-8.3099	9.57864e-17	8.88114e-16
TRRAP	474.859	-0.699863	0.0842881	-8.30322	1.01327e-16	9.3844e-16
NAGK	510.548	0.664999	0.0801808	8.29375	1.09732e-16	1.01403e-15
CYB5A	361.456	0.805977	0.0971942	8.29245	1.10943e-16	1.02466e-15
FBXW7	411.158	-0.774442	0.0934094	-8.29084	1.12453e-16	1.03803e-15
TPX2	838.851	-1.00059	0.120701	-8.28983	1.13411e-16	1.04629e-15
HTATSF1	1178.7	-0.448124	0.0540814	-8.2861	1.17023e-16	1.07842e-15
DHFR	1259.66	-0.428575	0.0517226	-8.28603	1.17092e-16	1.07846e-15
RNF149	497.23	-0.6793	0.0821225	-8.27178	1.31969e-16	1.21415e-15
PTP4A2	2565.14	-0.297352	0.0359483	-8.27166	1.3211e-16	1.21477e-15
RIN3	555.207	-0.656247	0.0794303	-8.26192	1.43349e-16	1.31594e-15
SF3B6	2068.44	0.331189	0.0400877	8.26162	1.43704e-16	1.31847e-15
SNW1	1530.03	-0.387201	0.0468926	-8.25717	1.49162e-16	1.3678e-15
UBR3	364.775	-0.784071	0.0949691	-8.25606	1.50558e-16	1.37984e-15
MMGT1	336.849	-0.82822	0.100327	-8.2552	1.5165e-16	1.38908e-15
ATP5F1C	2631.67	0.307518	0.0372901	8.24665	1.62897e-16	1.49129e-15
CASC4	580.093	-0.641354	0.0778059	-8.24301	1.67935e-16	1.53656e-15
ZNF93	362.35	-0.821015	0.0996432	-8.23954	1.7287e-16	1.57998e-15
C11orf21	316.064	0.860048	0.104394	8.23851	1.74363e-16	1.59276e-15
DSTYK	419.273	-0.756068	0.0918004	-8.23601	1.78056e-16	1.6256e-15
CFAP20	525.925	0.651927	0.0792461	8.22662	1.9257e-16	1.75427e-15
NFE2L2	995.785	-0.47917	0.058306	-8.21819	2.06598e-16	1.88103e-15
BPGM	389.94	-0.773405	0.0941781	-8.21215	2.17254e-16	1.9759e-15
ABHD2	629.706	-0.603607	0.0735352	-8.20841	2.24145e-16	2.03746e-15
PIK3CA	392.095	-0.764359	0.0931559	-8.20516	2.30283e-16	2.09097e-15
PDCD6IP	1225.43	-0.424995	0.0518028	-8.20409	2.32348e-16	2.10858e-15
FGD5-AS1	704.611	-0.590513	0.0719786	-8.20401	2.32491e-16	2.10873e-15
UBAC1	599.752	-0.628129	0.0765785	-8.20242	2.35593e-16	2.1357e-15
WASHC2C	372.76	-0.771004	0.0940573	-8.19717	2.46119e-16	2.22991e-15
NDUFS5	2752.01	-0.284158	0.0346663	-8.19696	2.46549e-16	2.23259e-15
RNGTT	314.807	-0.849841	0.103709	-8.19444	2.51756e-16	2.27851e-15
RPAP3	483.518	-0.708166	0.0864562	-8.19104	2.58976e-16	2.34258e-15
FDPS	1369.63	0.425401	0.0519478	8.18901	2.63384e-16	2.38116e-15
ZNF141	441.985	-0.715246	0.0873629	-8.18708	2.67648e-16	2.4184e-15
ZRANB2	2856.2	-0.284393	0.0347419	-8.18587	2.70338e-16	2.44138e-15
MON2	517.603	-0.690519	0.0843866	-8.1828	2.77321e-16	2.50309e-15
USP36	315.266	-0.880673	0.107662	-8.17999	2.83866e-16	2.5594e-15
ATP5IF1	2243.31	0.314251	0.0384343	8.17632	2.92638e-16	2.63707e-15
TAF1	525.378	-0.670753	0.0821111	-8.16885	3.1135e-16	2.80114e-15
PPM1K	620.22	0.596787	0.0730972	8.1643	3.23315e-16	2.90722e-15
LMNB1	1256.22	-0.463755	0.0568299	-8.16041	3.33891e-16	3.0007e-15
FAM91A1	581.199	-0.669385	0.082069	-8.15637	3.45252e-16	3.10113e-15
CTCF	1379.58	-0.427746	0.0524662	-8.15278	3.55655e-16	3.19285e-15
FNTA	815.816	0.531406	0.0652732	8.14125	3.91221e-16	3.51025e-15
PPM1G	1753.76	-0.376736	0.0462856	-8.13939	3.97267e-16	3.56259e-15
PABPC4	902.04	-0.492246	0.0605942	-8.12365	4.52352e-16	4.05004e-15
RB1	735.919	-0.544388	0.0670168	-8.12316	4.54219e-16	4.06457e-15
EDEM2	468.427	0.680637	0.0838797	8.11444	4.88016e-16	4.36467e-15
MORC3	642.396	-0.618472	0.0762669	-8.10931	5.09091e-16	4.54828e-15
CDC5L	1264.06	-0.411575	0.0507599	-8.10826	5.13511e-16	4.58531e-15
YIPF3	707.409	0.547834	0.0676023	8.10377	5.32805e-16	4.75505e-15
POGZ	745.613	-0.5564	0.0687028	-8.09865	5.55726e-16	4.95696e-15
STK11IP	576.64	0.694867	0.0858208	8.09672	5.64599e-16	5.03072e-15
LIG1	664.311	-0.582974	0.0720044	-8.09637	5.66249e-16	5.04273e-15
SUCLG1	1175.74	0.457303	0.0565205	8.09093	5.92106e-16	5.27018e-15
ZBTB11	568.596	-0.621417	0.0768087	-8.09045	5.94455e-16	5.28827e-15
EXOC6	904.774	-0.499792	0.0617836	-8.0894	5.99585e-16	5.33107e-15
TBC1D15	582.764	-0.618931	0.0765208	-8.08841	6.04484e-16	5.37176e-15
ZMIZ1	820.825	-0.509625	0.063062	-8.08133	6.4062e-16	5.68985e-15
GTF3C1	383.365	-0.799755	0.0989954	-8.0787	6.54603e-16	5.81095e-15
CREBZF	1274.47	-0.408417	0.0505651	-8.07706	6.6349e-16	5.88671e-15
SMC2	1568.77	-0.405759	0.0502471	-8.07527	6.73301e-16	5.97058e-15
SHKBP1	803.383	0.511893	0.0634635	8.06595	7.267e-16	6.44068e-15
MFSD1	1039.11	-0.462029	0.0572943	-8.06413	7.37573e-16	6.53358e-15
RPS9	50361.7	0.0753563	0.00934556	8.06332	7.4249e-16	6.57364e-15
TMEM167B	446.118	-0.722275	0.0895824	-8.06269	7.46353e-16	6.60433e-15
MAVS	632.945	-0.613049	0.0760792	-8.05803	7.75338e-16	6.84266e-15
GNA13	422.859	-0.717532	0.0891207	-8.05124	8.19621e-16	7.22965e-15
MARF1	435.984	-0.718624	0.0893708	-8.04093	8.91606e-16	7.8563e-15
RNF5	638.101	0.572824	0.0712519	8.03942	9.02624e-16	7.94919e-15
SPIN4	663.43	-0.628315	0.078248	-8.02979	9.76432e-16	8.59466e-15
ANKRD28	3524.32	-0.245872	0.030622	-8.02925	9.80685e-16	8.62754e-15
PPTC7	444.266	-0.688247	0.0857296	-8.02811	9.89823e-16	8.70335e-15
ATE1	358.384	-0.786456	0.0980001	-8.02506	1.01479e-15	8.91821e-15
BRI3	1463.94	0.390128	0.0486184	8.02429	1.02112e-15	8.96435e-15
UQCRH	7020.21	0.173747	0.0216559	8.02308	1.03123e-15	9.04836e-15
RFC1	1308.6	-0.413109	0.0514987	-8.02173	1.04268e-15	9.14399e-15
AC013394.1	327.685	-0.83017	0.103538	-8.01803	1.07458e-15	9.41389e-15
ALG13	615.03	-0.629539	0.0785165	-8.01793	1.07543e-15	9.41637e-15
MLLT10	916.096	-0.482304	0.0601846	-8.01375	1.11263e-15	9.72679e-15
TRAF3IP3	885.866	0.490292	0.0611888	8.01278	1.12144e-15	9.79865e-15
GOLIM4	1039.84	-0.478542	0.0597443	-8.00983	1.14864e-15	1.00311e-14
BAX	1564.22	0.392381	0.0490027	8.00734	1.17213e-15	1.02308e-14
MAF1	1014	0.462364	0.0577642	8.00433	1.20119e-15	1.0479e-14
TRIAP1	515.371	0.641741	0.0801963	8.00212	1.22296e-15	1.06633e-14
SNX13	322.389	-0.86153	0.107684	-8.00051	1.23902e-15	1.07977e-14
CDC26	525.65	0.633567	0.0792282	7.99674	1.27757e-15	1.11279e-14
NDUFAB1	1258.06	0.414993	0.0519253	7.99212	1.32643e-15	1.15414e-14
GTF2A2	926.038	0.474786	0.0594188	7.9905	1.34392e-15	1.16814e-14
IDH2	2255.99	0.31111	0.0389359	7.99032	1.34592e-15	1.16927e-14
TNS3	401.223	-0.734629	0.0919691	-7.98778	1.37388e-15	1.19294e-14
ALDH5A1	382.603	-0.778927	0.0975641	-7.98375	1.41955e-15	1.23195e-14
CDC42SE2	1102.46	-0.441479	0.0553137	-7.98137	1.44716e-15	1.25526e-14
SUGP2	1270	-0.406408	0.05093	-7.97975	1.46631e-15	1.27055e-14
SDHAF2	502.838	0.65694	0.0823571	7.97672	1.50271e-15	1.30141e-14
SYK	1105.87	-0.476504	0.0597484	-7.97517	1.52173e-15	1.31652e-14
BCL2	1320.42	-0.400148	0.0502088	-7.96967	1.59098e-15	1.37501e-14
TEX264	535.156	0.630639	0.0791692	7.96571	1.6428e-15	1.41832e-14
LPAR4	306.336	0.834071	0.104785	7.95985	1.72246e-15	1.48555e-14
HEBP1	973.064	0.468314	0.0588588	7.95658	1.76865e-15	1.52381e-14
TNKS2	478.93	-0.688086	0.0865233	-7.9526	1.82635e-15	1.5719e-14
ATF4	1894.29	-0.331228	0.0416843	-7.94611	1.92454e-15	1.65556e-14
SEC31A	1041.84	-0.444618	0.0559829	-7.94203	1.98893e-15	1.70919e-14
CNOT2	1370.35	-0.387799	0.0488311	-7.94164	1.99533e-15	1.7138e-14
G3BP1	1736.21	-0.34372	0.0432895	-7.94005	2.02105e-15	1.735e-14
FAM204A	1133.42	-0.427289	0.0538571	-7.93376	2.12616e-15	1.8243e-14
TLK1	1095.6	-0.447579	0.0564246	-7.93234	2.15061e-15	1.84433e-14
MLX	373.997	0.761672	0.096033	7.93135	2.16772e-15	1.85614e-14
CCNB1IP1	1669.3	0.372957	0.0471022	7.91804	2.41288e-15	2.06394e-14
SSR4	3377.42	0.250503	0.0317037	7.90138	2.75826e-15	2.35575e-14
CASP8AP2	767.421	-0.538094	0.068123	-7.89886	2.8146e-15	2.40018e-14
ARHGAP35	352.065	-0.766858	0.0970869	-7.89868	2.81863e-15	2.40239e-14
VPS51	1423.63	0.381722	0.0483483	7.89525	2.89727e-15	2.46815e-14
GALNT7	1045.27	-0.449571	0.0569453	-7.89478	2.9082e-15	2.47497e-14
IL27RA	389.474	0.781579	0.0990698	7.88918	3.04182e-15	2.58733e-14
RAPGEF1	319.737	-0.818286	0.103818	-7.88194	3.22341e-15	2.74039e-14
RRAGA	457.88	0.672548	0.0853316	7.88158	3.23265e-15	2.74685e-14
PHC3	804.171	-0.551386	0.0699836	-7.87879	3.30558e-15	2.80739e-14
KDM3B	589.002	-0.599411	0.0761592	-7.8705	3.53215e-15	2.99676e-14
FES	759.481	0.516954	0.065686	7.87008	3.54426e-15	3.0055e-14
C19orf25	474.869	0.690553	0.0878349	7.86195	3.78199e-15	3.20384e-14
DDX39B	949.286	-0.475768	0.0605719	-7.8546	4.01058e-15	3.39231e-14
SCAF8	412.091	-0.706768	0.0899953	-7.85339	4.04934e-15	3.42163e-14
SRP14	6778.9	0.182407	0.0232265	7.85343	4.04823e-15	3.42163e-14
UXT	4096.02	0.226771	0.028877	7.85301	4.06185e-15	3.43046e-14
CYC1	977.994	0.454406	0.0578756	7.85142	4.11348e-15	3.47231e-14
EIF4EBP2	736.129	-0.542567	0.0691079	-7.85102	4.12672e-15	3.48172e-14
RNFT1	416.637	0.696045	0.0887066	7.84661	4.27446e-15	3.60273e-14
EIF3K	5456.66	0.199691	0.0254536	7.84532	4.31867e-15	3.63815e-14
TMEM109	556.39	0.617833	0.0788605	7.8345	4.70701e-15	3.9593e-14
CEP152	460.542	-0.680146	0.0868656	-7.82986	4.88412e-15	4.1062e-14
NOM1	336.401	-0.795737	0.101674	-7.82632	5.02368e-15	4.22141e-14
TMEM14C	1449.91	0.379624	0.048535	7.82166	5.21319e-15	4.37845e-14
CUL3	896.606	-0.478803	0.0612257	-7.8203	5.26981e-15	4.42377e-14
AP1S2	998.424	0.443611	0.0567367	7.81877	5.33405e-15	4.47545e-14
RBBP7	1625.84	-0.353474	0.0452289	-7.81524	5.48584e-15	4.6005e-14
YBX1	12220	-0.138167	0.0176896	-7.81065	5.68929e-15	4.76632e-14
PABPN1	2058.34	0.314207	0.0402352	7.80924	5.7533e-15	4.81752e-14
UTP20	303.303	-0.818595	0.104867	-7.806	5.90307e-15	4.94045e-14
FAM173A	416.587	0.692108	0.0886716	7.8053	5.93597e-15	4.9655e-14
TCAF1	1024.2	-0.444806	0.0569995	-7.80369	6.01247e-15	5.02697e-14
PSMB3	1751.11	0.348433	0.04466	7.8019	6.09809e-15	5.09345e-14
UBE2I	2634.02	0.283111	0.0362924	7.80084	6.14969e-15	5.13141e-14
EIF2D	576.023	0.594627	0.0762567	7.79771	6.30423e-15	5.25772e-14
FERMT3	1352.25	0.382278	0.0490263	7.7974	6.3195e-15	5.26783e-14
FAM32A	730.276	0.536799	0.0688619	7.7953	6.42564e-15	5.35363e-14
YTHDF3	493.43	-0.637162	0.0817493	-7.79409	6.48726e-15	5.40227e-14
DNAJC3	602.152	-0.598732	0.0768291	-7.79305	6.54133e-15	5.44458e-14
SRI	1160.38	0.411055	0.0527482	7.79277	6.55555e-15	5.45328e-14
HDAC10	332.838	0.789901	0.101391	7.79062	6.6682e-15	5.53912e-14
BRIP1	452.104	-0.676601	0.0868913	-7.78675	6.87563e-15	5.70291e-14
TMEM156	323.446	0.844476	0.108464	7.78575	6.92992e-15	5.74508e-14
CEP295	493.686	-0.67023	0.0861088	-7.78352	7.05322e-15	5.84149e-14
NAPG	363.165	-0.739423	0.0950845	-7.77648	7.45703e-15	6.15758e-14
LARP1B	400.209	-0.713225	0.0917431	-7.77416	7.59518e-15	6.26546e-14
ARID4B	2121.19	-0.303643	0.0390835	-7.76909	7.90545e-15	6.51818e-14
TCF12	510.221	-0.648262	0.0834889	-7.76465	8.18681e-15	6.74351e-14
EVA1B	1748.53	0.344697	0.0444168	7.7605	8.45932e-15	6.96453e-14
ZMYND8	562.933	-0.623874	0.0804366	-7.7561	8.75836e-15	7.20717e-14
SMIM20	588.471	0.574712	0.0741107	7.75477	8.85005e-15	7.27715e-14
YPEL3	1479.91	0.371867	0.0479534	7.75474	8.85212e-15	7.27715e-14
UHRF1	806.835	-0.505993	0.0652543	-7.75417	8.89224e-15	7.30653e-14
PSMB5	607.687	0.570007	0.0736016	7.74449	9.59631e-15	7.87728e-14
ZGRF1	333.895	-0.781179	0.100888	-7.74301	9.70899e-15	7.96586e-14
UTP3	436.629	0.676616	0.0873912	7.74239	9.75674e-15	8.00111e-14
ZBTB1	535.524	-0.608223	0.0785694	-7.74122	9.84664e-15	8.0669e-14
ZDHHC12	399.885	0.696588	0.090102	7.7311	1.06622e-14	8.72222e-14
AC025171.2	339.38	0.76266	0.098703	7.72682	1.1027e-14	9.01619e-14
HDDC2	479.731	0.660162	0.0854536	7.72538	1.11516e-14	9.11359e-14
SYNRG	618.196	-0.567952	0.0735197	-7.72516	1.11709e-14	9.12491e-14
ATR	360.817	-0.765951	0.0991546	-7.72481	1.12017e-14	9.14354e-14
IMPA2	789.434	0.503239	0.0651775	7.72106	1.15371e-14	9.41019e-14
NINJ2	456.364	0.717255	0.0929198	7.71908	1.17175e-14	9.54806e-14
PACSIN2	528.173	-0.630709	0.0817077	-7.71909	1.17161e-14	9.54806e-14
AKAP13	1464.78	-0.367691	0.0476439	-7.71748	1.18651e-14	9.66358e-14
MOB1A	1695.66	-0.339385	0.043981	-7.71663	1.1945e-14	9.72389e-14
MKI67	1413.4	-1.04235	0.13516	-7.71202	1.23843e-14	1.00717e-13
MDC1	323.925	-0.792458	0.10279	-7.70947	1.26339e-14	1.02697e-13
CBL	489.917	-0.693116	0.0899358	-7.70678	1.29032e-14	1.04834e-13
KIAA2026	698.651	-0.526086	0.0682646	-7.70657	1.29244e-14	1.04956e-13
FAM160B1	484.55	-0.638136	0.0828074	-7.70627	1.29553e-14	1.05156e-13
USP16	839.795	-0.486424	0.063138	-7.70415	1.31717e-14	1.0686e-13
ACBD6	843.985	-0.485393	0.0630057	-7.70396	1.31912e-14	1.06966e-13
PYCARD	1955.99	0.330347	0.0428932	7.70162	1.34348e-14	1.08889e-13
PPP6R3	786.615	-0.502801	0.065348	-7.69421	1.42368e-14	1.15277e-13
CXorf21	439.416	0.663538	0.0862423	7.69388	1.42741e-14	1.15523e-13
PHF12	416.692	-0.683748	0.0888702	-7.69379	1.42843e-14	1.15549e-13
TACC1	900.202	-0.471285	0.0612664	-7.69239	1.44408e-14	1.16702e-13
PTPN7	1948.59	0.319637	0.0415557	7.69178	1.45098e-14	1.17202e-13
ZFAND2B	634.344	0.56203	0.0731344	7.68489	1.53129e-14	1.2357e-13
SP100	1110.89	-0.423248	0.0551003	-7.6814	1.5736e-14	1.26861e-13
HNRNPA1P48	336.282	-0.775731	0.101	-7.68054	1.58424e-14	1.27658e-13
GAPT	1553.28	0.354324	0.0461498	7.67769	1.61985e-14	1.30464e-13
HADHA	2530.37	-0.279697	0.0364364	-7.6763	1.63744e-14	1.31817e-13
TUBA1A	3548.52	0.287167	0.0374122	7.67577	1.64422e-14	1.32299e-13
ATP8B4	3054.03	-0.260912	0.033992	-7.67569	1.64534e-14	1.32326e-13
HOOK3	518.405	-0.614366	0.0800421	-7.67553	1.64741e-14	1.32428e-13
LMAN2	1231	0.402215	0.052437	7.67045	1.714e-14	1.37714e-13
PRDX3	1230.86	0.408188	0.0532236	7.66931	1.72923e-14	1.38872e-13
MBP	1565.41	0.38961	0.0508494	7.66203	1.83022e-14	1.4677e-13
AL034397.3	874.796	0.483343	0.0630917	7.66096	1.84548e-14	1.47922e-13
CMBL	356.878	-0.744721	0.0972529	-7.65757	1.89483e-14	1.51805e-13
DIP2B	526.138	-0.614593	0.0803358	-7.6503	2.00504e-14	1.60481e-13
FTX	1169.85	0.399853	0.0522729	7.64934	2.0201e-14	1.61531e-13
VPS29	1170.16	0.400946	0.0524157	7.64935	2.02005e-14	1.61531e-13
ZNF330	369.552	-0.752662	0.0984032	-7.64876	2.02931e-14	1.62189e-13
ABHD17A	816.842	0.488172	0.0639129	7.63809	2.20471e-14	1.76039e-13
CNOT10	381.8	-0.728165	0.0953509	-7.63669	2.22883e-14	1.7788e-13
COA6	468.794	0.639782	0.0838183	7.63296	2.29432e-14	1.82931e-13
COMMD7	985.95	0.448865	0.0588795	7.62346	2.46962e-14	1.96814e-13
AC002454.1	980.748	0.437955	0.0574909	7.61783	2.57982e-14	2.054e-13
NCKAP1L	1709.51	-0.334951	0.0439719	-7.61739	2.58853e-14	2.05996e-13
GYPB	479.972	-3.40844	0.448055	-7.60718	2.80133e-14	2.22611e-13
DNAJC4	786.169	0.486297	0.0639283	7.60691	2.8073e-14	2.2298e-13
ATP5PD	1517.29	0.369751	0.0486359	7.60242	2.9065e-14	2.30749e-13
ATP5S	875.359	-0.460405	0.0605897	-7.59873	2.99051e-14	2.37306e-13
PAICS	1457.18	-0.375602	0.0495048	-7.58719	3.26923e-14	2.59054e-13
CHCHD1	863.674	0.470623	0.0620527	7.58425	3.34424e-14	2.64746e-13
SLC36A4	549.47	-0.601763	0.0794088	-7.57804	3.50825e-14	2.77466e-13
FAM193A	433.521	-0.668781	0.0882668	-7.57681	3.54147e-14	2.79961e-13
HHEX	1495.74	0.355037	0.0468743	7.57425	3.61209e-14	2.85408e-13
CTR9	903.5	-0.477717	0.0631128	-7.56926	3.75361e-14	2.9645e-13
ZDHHC17	413.511	-0.730156	0.0964785	-7.56807	3.78807e-14	2.9903e-13
PPP1R3E	359.415	0.72368	0.0956633	7.56486	3.88283e-14	3.06365e-13
PUM3	699.838	-0.522941	0.0691453	-7.56293	3.94095e-14	3.10804e-13
TAOK3	1854.82	-0.320592	0.0424222	-7.55719	4.11875e-14	3.24519e-13
HSBP1	1664.64	0.343502	0.0454614	7.5559	4.15964e-14	3.27587e-13
SS18L2	632.444	0.5675	0.0751093	7.55566	4.1674e-14	3.28043e-13
STRN3	549.224	-0.59756	0.0790918	-7.55527	4.17982e-14	3.28865e-13
RBM23	804.884	-0.488564	0.0646715	-7.55455	4.20301e-14	3.30534e-13
C1orf174	349.502	0.725075	0.0960387	7.54982	4.35861e-14	3.42447e-13
ZNHIT3	768.62	0.48688	0.0645401	7.54384	4.56341e-14	3.58369e-13
CNIH1	893.013	0.4594	0.060921	7.54092	4.66663e-14	3.66303e-13
CSNK2A2	700.794	-0.534502	0.0710136	-7.52675	5.20178e-14	4.08117e-13
MFNG	540.966	0.612261	0.0813489	7.52635	5.21769e-14	4.09173e-13
NFKB1	493.108	-0.651839	0.0866357	-7.52391	5.31603e-14	4.16689e-13
MGAT1	640.316	0.533744	0.0709626	7.52148	5.41616e-14	4.24138e-13
FMR1	310.673	-0.811709	0.107927	-7.52092	5.43908e-14	4.25734e-13
PRKAG1	379.086	0.70915	0.0942926	7.52074	5.44673e-14	4.26133e-13
FOXJ3	372.742	-0.714651	0.0950697	-7.51712	5.59942e-14	4.37873e-13
MLXIP	1392.19	-0.368349	0.0490242	-7.51362	5.75129e-14	4.49539e-13
PLEKHA2	400.956	-0.694567	0.0924593	-7.51214	5.81707e-14	4.54467e-13
HMGXB3	324.519	-0.785701	0.104653	-7.50764	6.02035e-14	4.69908e-13
SUMO1	1451.85	0.372235	0.0495971	7.50517	6.13475e-14	4.78614e-13
DDX18	1455.2	-0.370011	0.049305	-7.50453	6.16498e-14	4.80747e-13
MBTD1	481.529	-0.629181	0.0838754	-7.50137	6.31521e-14	4.92232e-13
CRNKL1	370.504	-0.721902	0.0962632	-7.49925	6.41843e-14	5.00044e-13
GPR108	302.155	0.788912	0.105271	7.49408	6.6765e-14	5.19664e-13
TLE4	1503.77	-0.353634	0.0472052	-7.49141	6.81386e-14	5.30108e-13
PNISR	8457.7	0.149902	0.0200151	7.48945	6.91605e-14	5.37557e-13
TEX30	764.289	0.504887	0.0674329	7.48725	7.03328e-14	5.4616e-13
GRK3	478.282	-0.651851	0.0870624	-7.48717	7.03748e-14	5.46232e-13
CKS1B	1634.12	0.362917	0.0484861	7.48496	7.15671e-14	5.55228e-13
DHPS	1063.62	0.417711	0.0558542	7.47859	7.51256e-14	5.82293e-13
C8orf59	2035.27	0.298353	0.0399161	7.4745	7.74951e-14	6.0038e-13
H2AFV	4335.19	-0.221871	0.0296871	-7.47366	7.79972e-14	6.03989e-13
ZNF431	1035.23	-0.419677	0.0561706	-7.47147	7.93025e-14	6.13812e-13
DRAM2	533.177	0.589476	0.0789013	7.47106	7.95538e-14	6.15472e-13
HOXA6	522.838	-0.602661	0.0807273	-7.4654	8.30493e-14	6.41919e-13
AKAP8	435.686	-0.644003	0.0863224	-7.46044	8.62371e-14	6.6625e-13
NIFK	1413.02	0.379429	0.0508838	7.45677	8.86701e-14	6.8473e-13
TMEM203	471.495	0.63261	0.0848499	7.45564	8.94322e-14	6.90296e-13
RSBN1	663.609	-0.547419	0.0734311	-7.45488	8.99519e-14	6.93986e-13
CYTL1	432.187	0.644491	0.0864539	7.45474	9.00473e-14	6.94401e-13
GNA15	2093.4	-0.323002	0.0434003	-7.4424	9.88699e-14	7.6138e-13
AKT1	685.562	0.51676	0.0694588	7.43981	1.00833e-13	7.75785e-13
APOBEC3G	333.947	0.754234	0.10141	7.43745	1.02651e-13	7.89401e-13
KMT2B	389.185	-0.692229	0.0930782	-7.43707	1.02945e-13	7.91302e-13
SLC39A1	337.372	0.724596	0.0975145	7.43065	1.08062e-13	8.29868e-13
MSH3	410.777	-0.696855	0.0937895	-7.43	1.08601e-13	8.33625e-13
BRD1	432.34	-0.652133	0.0878153	-7.42619	1.11771e-13	8.57563e-13
NFATC2IP	1048.48	-0.422516	0.0569129	-7.4239	1.13722e-13	8.72133e-13
CYTIP	325.402	-0.764478	0.10303	-7.41996	1.17159e-13	8.98073e-13
MPST	1269.61	0.381941	0.0514976	7.41668	1.20095e-13	9.19315e-13
OGFRL1	407.219	-0.688527	0.092925	-7.40949	1.26787e-13	9.6832e-13
SENP7	562.089	-0.56282	0.0759767	-7.4078	1.28413e-13	9.80287e-13
DHX38	387.466	-0.744434	0.100588	-7.40084	1.35324e-13	1.03257e-12
CWC25	590.756	-0.570046	0.0770391	-7.39944	1.36764e-13	1.04308e-12
SCYL2	468.543	-0.622278	0.0841283	-7.39678	1.39525e-13	1.06366e-12
APC	405.607	-0.690319	0.0933396	-7.39578	1.4058e-13	1.07121e-12
WRNIP1	628.617	-0.535083	0.0723583	-7.39491	1.41505e-13	1.07776e-12
NFIX	530.293	-0.587828	0.0795739	-7.38719	1.49963e-13	1.14166e-12
SEH1L	441.813	-0.665492	0.0901409	-7.38279	1.55001e-13	1.17948e-12
GSE1	1518.32	-0.343639	0.0465464	-7.38272	1.55094e-13	1.17965e-12
ZNF121	448.677	-0.655867	0.0888699	-7.38008	1.58197e-13	1.20215e-12
RC3H1	513.375	-0.611288	0.0828499	-7.37826	1.60369e-13	1.21811e-12
ORAI2	561.5	-0.578705	0.0784433	-7.37738	1.6144e-13	1.22568e-12
AUTS2	792.435	-0.486486	0.0659824	-7.37296	1.6688e-13	1.26641e-12
APH1A	786.959	0.493541	0.0671126	7.35393	1.92468e-13	1.4586e-12
SH3D21	402.394	-0.749285	0.101896	-7.35343	1.93186e-13	1.46337e-12
P4HA1	383.032	-0.683589	0.0929808	-7.35194	1.95355e-13	1.47913e-12
CPSF6	1254.58	-0.380577	0.0517837	-7.34935	1.99171e-13	1.50734e-12
REV1	728.455	-0.506263	0.0689526	-7.34219	2.10119e-13	1.58875e-12
WASHC3	572.497	0.571763	0.0778975	7.33995	2.13681e-13	1.61422e-12
PDCD11	447.412	-0.669292	0.0912275	-7.33652	2.19226e-13	1.65536e-12
SLMAP	452.692	-0.643803	0.0877949	-7.33303	2.25009e-13	1.69826e-12
GLIPR1	519.815	0.59139	0.0806745	7.33056	2.29187e-13	1.72901e-12
SPSB3	710.836	0.507488	0.0692336	7.33008	2.30012e-13	1.73445e-12
AHI1	709.893	-0.508172	0.0694096	-7.32135	2.45482e-13	1.84776e-12
ATP5PF	3151.53	0.235239	0.0321323	7.32096	2.46211e-13	1.85242e-12
YAF2	766.345	-0.488635	0.0667554	-7.31978	2.48387e-13	1.86794e-12
PPP1R11	459.754	0.618885	0.0845515	7.31962	2.48674e-13	1.86926e-12
EXOC4	560.808	-0.569236	0.0777859	-7.31799	2.5172e-13	1.8913e-12
CALM2	6285.33	0.168912	0.0230866	7.31646	2.54605e-13	1.91212e-12
RPP25L	357.281	0.70391	0.0962234	7.31537	2.56671e-13	1.92677e-12
EMC7	482.474	0.610029	0.0834084	7.31376	2.59768e-13	1.94826e-12
CCDC47	603.181	-0.540853	0.0739632	-7.31247	2.62281e-13	1.96534e-12
LDHA	3334.42	0.246605	0.0337454	7.30781	2.71536e-13	2.03377e-12
C16orf54	579.825	0.57564	0.0788133	7.30385	2.79657e-13	2.09366e-12
CD84	1780.1	-0.337661	0.0462764	-7.2966	2.95121e-13	2.20745e-12
TNRC6B	2195.29	-0.291249	0.0399324	-7.29356	3.01862e-13	2.25686e-12
HBS1L	536.377	-0.582253	0.0798352	-7.29319	3.02709e-13	2.26218e-12
FABP5	2636.21	0.275526	0.0378208	7.28505	3.21561e-13	2.40091e-12
THAP12	503.497	-0.617366	0.0847685	-7.28297	3.26554e-13	2.4371e-12
TFDP2	2996.88	-0.26052	0.0357745	-7.28229	3.28207e-13	2.44834e-12
NFAT5	623.207	-0.555325	0.0763239	-7.2759	3.44107e-13	2.56466e-12
HOXA9	1574.19	0.336898	0.0463169	7.27377	3.49597e-13	2.60325e-12
SNX17	1030.3	0.405635	0.0558799	7.25906	3.8979e-13	2.89866e-12
COTL1	587.515	-0.55251	0.0761354	-7.25694	3.95943e-13	2.9418e-12
PEBP1	3535.76	0.224248	0.0309195	7.25263	4.08745e-13	3.03286e-12
MIER1	919.221	-0.482729	0.0666257	-7.24538	4.31218e-13	3.19677e-12
CSNK1A1	2011.46	-0.2982	0.0411744	-7.24235	4.40983e-13	3.2677e-12
NCOR2	628.932	-0.534603	0.0738211	-7.24187	4.42545e-13	3.27782e-12
ZNF22	2273.94	0.301442	0.0416442	7.23852	4.5361e-13	3.35828e-12
FHL3	485.653	0.606006	0.0837233	7.23819	4.54705e-13	3.3649e-12
RPS6KA3	996.565	-0.441861	0.0610743	-7.23481	4.6619e-13	3.44683e-12
NDUFS7	1065.16	0.397556	0.0549728	7.23186	4.76421e-13	3.51935e-12
HTR1F	684.102	0.511554	0.0707445	7.23101	4.79423e-13	3.53996e-12
USP3	438.378	-0.637376	0.088212	-7.2255	4.99252e-13	3.68312e-12
SYNGR1	771.691	-0.489417	0.0677557	-7.22325	5.07585e-13	3.74294e-12
MPP1	1248.38	-0.375918	0.0520589	-7.22102	5.15993e-13	3.80326e-12
MGST2	840.626	-0.464784	0.0644175	-7.21519	5.386e-13	3.96288e-12
ATP5F1D	3151.68	0.234963	0.0325869	7.21034	5.58139e-13	4.10483e-12
PACS1	417.401	-0.652393	0.0905148	-7.20759	5.69527e-13	4.18674e-12
SUDS3	509.95	-0.592476	0.0823058	-7.19847	6.08899e-13	4.47223e-12
DNAJC13	306.914	-0.758542	0.10543	-7.19475	6.25776e-13	4.59416e-12
PRELID1	990.037	0.455575	0.0633339	7.19322	6.32797e-13	4.64163e-12
UTP18	669.135	-0.513517	0.0714878	-7.18328	6.80571e-13	4.98767e-12
MRPL15	567.144	0.545193	0.0759175	7.18138	6.90107e-13	5.05533e-12
DUT	5563.58	0.190562	0.0265833	7.16847	7.58405e-13	5.54347e-12
TM2D1	608.289	0.528885	0.0737866	7.16777	7.62303e-13	5.56952e-12
FAM215B	449.552	0.610645	0.0852828	7.16024	8.05381e-13	5.88168e-12
GIGYF2	796.541	-0.485007	0.0678003	-7.15346	8.46149e-13	6.174e-12
KCNQ5	314.628	-0.74293	0.103862	-7.15302	8.48918e-13	6.18879e-12
SUPT4H1	1049.86	0.40751	0.0569699	7.15307	8.48564e-13	6.18879e-12
KPNA1	352.296	-0.725765	0.101475	-7.15218	8.54132e-13	6.22137e-12
PNPLA8	407.772	-0.641901	0.0898012	-7.14803	8.80343e-13	6.40948e-12
WDR83OS	2057.05	0.285787	0.039986	7.14718	8.85767e-13	6.44616e-12
SMG7	644.7	-0.511601	0.0716733	-7.13796	9.4729e-13	6.88488e-12
SLC25A37	2172.15	-1.75611	0.246216	-7.13239	9.86392e-13	7.16595e-12
CLU	390.473	-0.677655	0.0951108	-7.1249	1.04153e-12	7.55661e-12
ELOC	808.604	0.461756	0.0648134	7.12438	1.04548e-12	7.58197e-12
MPZL1	427.989	-0.638103	0.0896138	-7.12059	1.07463e-12	7.78327e-12
TWISTNB	921.644	-0.445933	0.0626398	-7.119	1.0871e-12	7.87018e-12
SDCCAG8	1084.94	-0.39105	0.054938	-7.11803	1.09482e-12	7.92258e-12
DEGS1	378.21	0.684028	0.0961268	7.11589	1.11189e-12	8.04265e-12
DNAJA3	309.81	0.773025	0.108649	7.11486	1.12028e-12	8.09978e-12
LGALS8	658.069	-0.507889	0.0714013	-7.11316	1.13416e-12	8.18955e-12
PLAC8	3983.37	0.203196	0.0285733	7.11139	1.14881e-12	8.29172e-12
NCOA3	411.011	-0.654096	0.0919822	-7.11111	1.15113e-12	8.30485e-12
HNRNPUL2	482.619	-0.591402	0.0831738	-7.11044	1.15676e-12	8.34073e-12
PCNX4	634.455	0.514821	0.072404	7.1104	1.1571e-12	8.34073e-12
PGAM1	883.096	0.438343	0.0616951	7.10499	1.20327e-12	8.66232e-12
TRIM56	1730.32	-0.31464	0.0443066	-7.10142	1.23484e-12	8.88188e-12
ATP5F1A	3248.96	-0.239461	0.0337207	-7.10131	1.23583e-12	8.88516e-12
KIAA0586	346.462	-0.700827	0.0987161	-7.09942	1.25279e-12	8.99934e-12
HECTD1	1359.21	-0.376151	0.0530236	-7.09403	1.30258e-12	9.35299e-12
STAT1	469.71	-0.627018	0.088424	-7.09104	1.3311e-12	9.5537e-12
MRPL33	1106.6	0.39205	0.0553102	7.08821	1.35856e-12	9.7424e-12
ATP6AP1	870.924	0.440325	0.062145	7.08545	1.38598e-12	9.93459e-12
PRTN3	1856.08	-1.57339	0.222061	-7.08539	1.38655e-12	9.93459e-12
PRDX1	2139.69	0.280999	0.039714	7.07558	1.48826e-12	1.0645e-11
IL17RE	300.188	0.770554	0.10898	7.07063	1.54236e-12	1.10178e-11
MICU1	416.434	-0.63832	0.090285	-7.07006	1.54866e-12	1.10581e-11
MANF	521.472	0.553517	0.0783515	7.06453	1.61156e-12	1.15022e-11
TIMP2	697.143	-0.489811	0.0693797	-7.05985	1.66677e-12	1.18862e-11
RALY	1776	0.305434	0.0432767	7.05771	1.69266e-12	1.20657e-11
ACBD3	673.015	-0.505642	0.0716746	-7.05469	1.72985e-12	1.23202e-11
METTL23	582.009	0.540669	0.0766486	7.05388	1.74002e-12	1.23874e-11
CD46	1270.54	-0.367284	0.0520971	-7.04998	1.78944e-12	1.27175e-11
TSHZ1	310.252	-0.730223	0.103588	-7.04932	1.79792e-12	1.27723e-11
NUDT3	960.822	-0.418041	0.0593074	-7.04871	1.80579e-12	1.28227e-11
KMT5A	529.472	-0.610241	0.0866734	-7.04069	1.91288e-12	1.35543e-11
TMA7	4472.05	0.213441	0.0303235	7.03879	1.93921e-12	1.3735e-11
NDUFA12	1188.76	0.390154	0.0554323	7.0384	1.94462e-12	1.37675e-11
GOLGA8N	462.286	-0.623485	0.0885945	-7.03752	1.95693e-12	1.38488e-11
SVBP	544.816	0.573996	0.0815817	7.03584	1.9807e-12	1.4011e-11
MDM2	679.761	-0.508068	0.0722288	-7.03416	2.00469e-12	1.41688e-11
PPID	536.473	0.560384	0.0796711	7.03371	2.01109e-12	1.42019e-11
ANKRD13A	571.69	-0.53807	0.0765073	-7.03292	2.02253e-12	1.42767e-11
SPTY2D1	358.291	-0.731308	0.103995	-7.03214	2.03391e-12	1.43509e-11
MACC1	436.333	-0.651492	0.0926518	-7.03161	2.04163e-12	1.43993e-11
EPDR1	329.859	0.733448	0.104331	7.03003	2.06483e-12	1.45568e-11
GOLPH3	553.497	-0.558081	0.0793967	-7.02902	2.07995e-12	1.4651e-11
FAM168B	313.262	-0.742968	0.105726	-7.02729	2.10577e-12	1.48016e-11
GSTK1	1478.42	0.330561	0.0470393	7.02734	2.10503e-12	1.48016e-11
TMEM11	450.828	0.604543	0.0860267	7.02738	2.10442e-12	1.48016e-11
SDCBP	1286.89	-0.353314	0.0503226	-7.02098	2.20318e-12	1.54733e-11
PLCB2	659.962	-0.510273	0.0726822	-7.0206	2.20913e-12	1.55086e-11
DHX15	1123.14	-0.386143	0.0550185	-7.01842	2.2439e-12	1.5746e-11
P2RY8	1010.79	-0.400472	0.0571026	-7.0132	2.32924e-12	1.63243e-11
C1QBP	2978.8	0.231981	0.0330835	7.01198	2.34964e-12	1.64603e-11
STXBP5	385.773	-0.681368	0.0971997	-7.00998	2.38351e-12	1.66906e-11
PCMTD2	463.984	-0.58736	0.0838056	-7.0086	2.40707e-12	1.68484e-11
PKM	2306.98	0.273801	0.0390798	7.00619	2.44891e-12	1.71341e-11
ABTB1	429.959	0.626114	0.0894098	7.00275	2.50984e-12	1.75531e-11
PLD4	581.003	0.550861	0.0786799	7.0013	2.53605e-12	1.77215e-11
CAB39	466.517	-0.593089	0.0847626	-6.99707	2.61376e-12	1.82569e-11
AQR	455.376	-0.594896	0.0850232	-6.99686	2.61762e-12	1.82762e-11
PDXDC1	492.089	-0.595847	0.0851765	-6.99544	2.64431e-12	1.84471e-11
GATAD2B	685.481	-0.487885	0.0698222	-6.98754	2.79745e-12	1.94991e-11
MAGEF1	378.269	0.66103	0.094603	6.98741	2.80008e-12	1.95093e-11
DDHD1	734.758	-0.506271	0.0724632	-6.98659	2.81641e-12	1.96149e-11
ISCA2	518.841	0.571592	0.0818345	6.98474	2.85388e-12	1.98593e-11
SNHG8	4750.11	0.184571	0.0264386	6.98114	2.92804e-12	2.03668e-11
TUT7	394.853	-0.650906	0.0932462	-6.98051	2.94112e-12	2.04493e-11
GTPBP1	316.385	-0.743734	0.106571	-6.97875	2.97808e-12	2.0689e-11
QPRT	531.071	-0.576897	0.0826668	-6.97859	2.98162e-12	2.0705e-11
PHF21A	405.835	-0.624053	0.0895758	-6.96676	3.24332e-12	2.25036e-11
NDUFA3	1159.56	0.384048	0.0551451	6.96432	3.29992e-12	2.28867e-11
AC060780.1	412.109	0.656923	0.0943558	6.96219	3.35022e-12	2.32259e-11
KANSL1	2089.05	-0.283675	0.0407467	-6.96191	3.35689e-12	2.32626e-11
JMJD6	324.654	-0.702232	0.100887	-6.9606	3.38829e-12	2.34704e-11
SEPT11	1452.63	-0.33876	0.0486774	-6.95929	3.41983e-12	2.36791e-11
JTB	2042.35	0.289536	0.0416223	6.95627	3.494e-12	2.41725e-11
NUDCD2	715.478	0.472792	0.067977	6.95517	3.52135e-12	2.43516e-11
ANKIB1	330.593	-0.69681	0.100206	-6.95379	3.55592e-12	2.45805e-11
C12orf65	400.654	0.633897	0.09117	6.95292	3.57814e-12	2.47238e-11
ATP6AP2	1156.52	0.364569	0.0524385	6.95231	3.59346e-12	2.48091e-11
MGAT4B	711.463	0.470979	0.0677582	6.95088	3.63026e-12	2.50529e-11
DGUOK	934.374	0.406812	0.0586478	6.93652	4.01865e-12	2.76874e-11
NDUFA8	496.595	0.580303	0.083667	6.93587	4.03727e-12	2.78041e-11
ILK	392.106	0.652024	0.0940304	6.93418	4.08577e-12	2.81266e-11
NDUFS3	984.716	0.394575	0.0569181	6.93232	4.13981e-12	2.84751e-11
NUMB	653.376	-0.507091	0.0731626	-6.93102	4.17806e-12	2.87263e-11
ANXA1	6495.19	0.197235	0.028459	6.93048	4.19401e-12	2.88241e-11
TMED5	588.085	-0.53637	0.0774149	-6.92851	4.25295e-12	2.92172e-11
CLK4	400.402	0.6222	0.0898061	6.92825	4.26072e-12	2.92584e-11
PRDX5	1558.91	0.318522	0.0459788	6.92757	4.2814e-12	2.93884e-11
PTAR1	670.325	-0.493416	0.0712298	-6.92709	4.29572e-12	2.94745e-11
RBM28	752.495	-0.451513	0.0652835	-6.91619	4.63941e-12	3.17935e-11
RHEX	1028.27	-0.404501	0.0585114	-6.9132	4.73856e-12	3.24597e-11
MRPS23	558.36	0.52955	0.0766069	6.91256	4.75973e-12	3.25913e-11
IMMT	1048.51	-0.393451	0.0569538	-6.90825	4.90673e-12	3.3584e-11
ABCA2	424.467	0.621162	0.089984	6.90302	5.09072e-12	3.48291e-11
SPOP	783.455	0.452318	0.0655492	6.90043	5.1845e-12	3.54561e-11
ZNF770	555.409	-0.527534	0.0764642	-6.8991	5.23338e-12	3.57757e-11
UBE2O	311.562	-0.741283	0.107495	-6.89599	5.34918e-12	3.65524e-11
AKAP17A	767.355	-0.478858	0.0694444	-6.89556	5.36547e-12	3.66486e-11
[truncated: 3,467 more rows]

## Sheet: README
The tables report DEGs identified by DESeq2 between Relapse and Tumor samples.

## Sheet: UD5
symbol	baseMean	log2FoldChange	lfcSE	stat	pvalue	padj
A1BG	330.228	-1.32557	0.262821	-5.0436	4.5685e-07	1.37208e-06
AAAS	471.786	1.21323	0.136549	8.88492	6.39696e-19	5.12502e-18
AACS	805.275	-1.9147	0.151003	-12.6799	7.64671e-37	1.66054e-35
AAED1	564.274	-2.47717	0.123605	-20.041	2.41669e-89	3.13562e-87
AAK1	856.289	-1.7015	0.225247	-7.55395	4.22263e-14	2.38665e-13
AAMP	751.182	1.10888	0.124211	8.92739	4.36161e-19	3.52448e-18
AAR2	312.473	1.11295	0.144486	7.70277	1.33151e-14	7.81925e-14
AARS	955.592	1.43388	0.133713	10.7236	7.88911e-27	1.02567e-25
AARS2	825.311	0.701568	0.0917162	7.64934	2.02014e-14	1.16771e-13
AARSD1	412.667	0.428468	0.11283	3.79745	0.000146192	0.000333228
AATF	774.752	1.34092	0.118735	11.2934	1.41455e-29	2.10853e-28
ABC7-42389800N19.1	390.018	1.05893	0.186129	5.68924	1.27608e-08	4.49164e-08
ABCA1	518.958	-3.03657	0.266019	-11.4148	3.52546e-30	5.45204e-29
ABCA2	6054.34	-1.12537	0.242277	-4.64499	3.40091e-06	9.3361e-06
ABCA7	1875.23	-1.18807	0.25484	-4.66201	3.1313e-06	8.61431e-06
ABCB10	1396.09	1.90654	0.190958	9.98405	1.79009e-23	1.91643e-22
ABCB6	403.93	1.56042	0.178715	8.73132	2.51728e-18	1.94136e-17
ABCB7	314.45	1.10016	0.123132	8.93484	4.07766e-19	3.3002e-18
ABCB8	353.108	0.444211	0.254362	1.74637	0.0807459	0.119858
ABCC1	3094.87	-0.901835	0.100363	-8.98577	2.56927e-19	2.11088e-18
ABCC10	1165.21	-2.0477	0.289801	-7.06588	1.59605e-12	7.90363e-12
ABCC4	593.618	-0.672537	0.139198	-4.83152	1.35496e-06	3.87802e-06
ABCC5	1456.92	0.139802	0.107571	1.29963	0.193728	0.261461
ABCD3	383.216	0.870269	0.173675	5.01091	5.41744e-07	1.61156e-06
ABCD4	1217.32	-0.598085	0.128281	-4.66231	3.12679e-06	8.60304e-06
ABCE1	691.285	1.80565	0.269659	6.69605	2.14126e-11	9.62193e-11
ABCF1	1198.69	-0.48548	0.184892	-2.62575	0.00864582	0.015487
ABCF2	602.393	1.79501	0.097276	18.4527	4.95917e-76	4.69301e-74
ABCF3	579.66	-0.11287	0.112097	-1.00689	0.313986	0.395019
ABCG1	389.191	-1.55032	0.189595	-8.17704	2.90898e-16	1.93588e-15
ABHD12	395.504	-0.00226316	0.192131	-0.0117793	0.990602	1
ABHD15	400.094	0.733602	0.183024	4.00823	6.11751e-05	0.000145732
ABHD16A	584.885	0.169239	0.0824217	2.05333	0.0400402	0.0634382
ABHD17A	921.549	0.968266	0.418546	2.3134	0.0207005	0.0346914
ABHD17B	551.987	1.61364	0.189356	8.52173	1.57185e-17	1.14868e-16
ABHD2	1854.46	-0.104295	0.12556	-0.830637	0.406178	0.492562
ABHD3	312.004	-0.163197	0.136712	-1.19373	0.232584	0.305992
ABI1	656.611	0.609779	0.139191	4.38089	1.18194e-05	3.06055e-05
ABI2	544.438	0.220513	0.266643	0.826996	0.408239	0.494799
ABL1	1299.46	0.999618	0.167379	5.97219	2.34088e-09	8.80764e-09
ABL2	677.316	-1.06485	0.130711	-8.14657	3.74395e-16	2.47003e-15
ABLIM1	441.416	-0.947	0.23026	-4.11274	3.90987e-05	9.54791e-05
ABR	1424.8	-1.05005	0.196713	-5.33796	9.39966e-08	3.02378e-07
ABTB1	761.657	-1.49875	0.238697	-6.27886	3.41055e-10	1.38096e-09
AC003102.1	383.235	-10.2417	1.56662	-6.53744	6.25807e-11	2.71113e-10
AC004057.1	1491.7	2.23112	0.172098	12.9643	1.95024e-38	4.59286e-37
AC004824.2	334.249	-2.40192	0.229417	-10.4697	1.19052e-25	1.45846e-24
AC008738.1	934.796	0.225263	1.17083	0.192396	0.847432	0.892911
AC010441.1	515.76	2.07984	0.142192	14.6269	1.89182e-48	6.764e-47
AC010642.1	407.557	0.52328	0.158946	3.29219	0.000994109	0.00204125
AC010970.2	54068.5	2.2046	1.04054	2.11871	0.0341147	0.0548334
AC021860.1	359.237	-1.75654	0.124761	-14.0792	5.09575e-45	1.59281e-43
AC091390.2	462.908	-2.81128	0.150012	-18.7404	2.31718e-78	2.27635e-76
AC092299.8	543.229	-2.43728	0.422243	-5.77221	7.82366e-09	2.80993e-08
AC093838.4	491.494	-0.878564	0.192745	-4.55817	5.16011e-06	1.39082e-05
AC104600.1	507.129	-2.0727	0.297796	-6.96012	3.39986e-12	1.63723e-11
AC112218.1	303.719	0.163105	0.77823	0.209584	0.833992	0.882276
AC115618.1	427.28	-0.73831	0.88618	-0.833138
AC125232.1	575.491	-0.493335	0.252639	-1.95273	0.0508519	0.0787594
AC138827.2	645.434	-2.11199	0.135708	-15.5628	1.30369e-54	5.99001e-53
AC217772.1	511.749	-0.401463	0.288334	-1.39235	0.163815	0.225948
AC239799.1	521.625	-1.06667	0.152239	-7.00656	2.44256e-12	1.18929e-11
AC239811.1	368.812	-0.864644	0.33833	-2.55562	0.0105999	0.0187006
AC239811.2	1245.73	-1.54092	0.159583	-9.65594	4.63871e-22	4.55915e-21
AC240565.2	366.432	-1.59998	0.265148	-6.03431	1.59641e-09	6.09664e-09
AC242842.2	873.881	-0.505169	0.191795	-2.63391	0.00844088	0.0151422
AC245884.2	391.171	1.80605	0.231175	7.81247	5.60786e-15	3.38176e-14
AC245884.3	3838.13	-1.63432	0.63025	-2.59313	0.00951066	0.0169303
ACAA1	778.288	-0.132649	0.0959327	-1.38273	0.166747	0.229332
ACAA2	355.179	1.45651	0.127117	11.458	2.14305e-30	3.34425e-29
ACACA	1292.06	-0.313172	0.149405	-2.09613	0.0360711	0.0577619
ACACB	490.376	-2.05493	0.163658	-12.5562	3.67346e-36	7.69376e-35
ACAD10	643.673	-0.0656135	0.129239	-0.507692	0.611669	0.692006
ACAD11	393.839	-0.0369292	0.207367	-0.178086	0.858655	0.902097
ACAD8	381.994	-0.00418268	0.129235	-0.032365	0.974181	0.99207
ACAD9	803.885	0.453871	0.162559	2.79204	0.00523768	0.00969785
ACADVL	4319.07	0.594531	0.107232	5.54434	2.9506e-08	1.00265e-07
ACAP1	3236.05	0.792327	0.155859	5.08361	3.70327e-07	1.12268e-06
ACAP2	1611.92	-0.69386	0.128938	-5.38134	7.39332e-08	2.40574e-07
ACAP3	1621.24	-1.04404	0.275324	-3.79203	0.000149422	0.000340277
ACBD3	529.763	0.647042	0.192307	3.36464	0.000766441	0.00159779
ACBD5	406.5	0.0506439	0.121729	0.416038	0.677382	0.750737
ACBD6	710.631	1.29385	0.136634	9.46948	2.81252e-21	2.63498e-20
ACCS	643.017	0.269883	0.163624	1.64941	0.0990635	0.144348
ACER3	522.452	-0.829952	0.22599	-3.67251	0.000240179	0.000534393
ACIN1	3454.06	-0.0627782	0.112229	-0.559375	0.575905	0.658844
ACLY	1686.37	1.20628	0.124106	9.71975	2.48379e-22	2.47539e-21
ACO2	964.531	0.80643	0.0862736	9.34735	8.98675e-21	8.1243e-20
ACOT11	1586.4	-0.184686	0.0744345	-2.48119	0.0130944	0.0227849
ACOT9	520.802	-0.512759	0.120915	-4.24067	2.22852e-05	5.6032e-05
ACOX1	750.919	0.3452	0.14089	2.45014	0.0142801	0.0246814
ACP1	439.594	1.4798	0.180441	8.20101	2.38376e-16	1.59562e-15
ACSF2	318.245	-0.0249778	0.0969065	-0.257751	0.796599	0.851273
ACSF3	1236.93	0.227331	0.171641	1.32445	0.185353	0.251701
ACSL1	884.629	-0.436174	0.157053	-2.77724	0.00548227	0.0101244
ACSL3	412.621	-0.642627	0.355355	-1.80841	0.0705429	0.106002
ACSL4	644.338	0.014704	0.379767	0.0387185	0.969115	0.988326
ACSL5	577.937	1.19073	0.140458	8.47748	2.30116e-17	1.66572e-16
ACSL6	1111.3	0.459155	0.237679	1.93183	0.0533808	0.0823607
ACSM3	303.774	0.838631	0.179369	4.67545	2.9331e-06	8.10037e-06
ACSS1	1056.64	0.93814	0.129616	7.23787	4.55799e-13	2.36378e-12
ACSS2	358.383	-0.39287	0.210939	-1.86249	0.0625347	0.0951044
ACTB	28630.5	1.00741	0.0879351	11.4562	2.18802e-30	3.41186e-29
ACTG1	14906	1.70898	0.161991	10.5499	5.08569e-26	6.35866e-25
ACTL6A	301.322	2.2159	0.17068	12.9828	1.5322e-38	3.62076e-37
ACTN1	2562.72	0.726408	0.127495	5.69754	1.21551e-08	4.28722e-08
ACTN4	3237.35	0.648041	0.236888	2.73564	0.00622589	0.0114108
ACTR1A	675.189	0.482459	0.111887	4.31201	1.61778e-05	4.12594e-05
ACTR1B	877.613	1.10183	0.164025	6.71743	1.84958e-11	8.35125e-11
ACTR2	1924.16	0.442823	0.148765	2.97666	0.00291404	0.0055912
ACTR3	2119.69	0.746262	0.117448	6.35396	2.09839e-10	8.67356e-10
ACVR1B	417.19	-0.446439	0.153084	-2.91631	0.00354198	0.006713
ADA	870.891	3.11621	0.085644	36.3856	7.17976e-290	2.11598e-286
ADAM10	1264.28	-0.304528	0.0863263	-3.52764	0.000419278	0.000903931
ADAM15	1014.69	-0.590545	0.164654	-3.58657	0.000335056	0.000732304
ADAM17	859.93	-1.25832	0.111032	-11.3329	9.01998e-30	1.36524e-28
ADAM28	694.465	-0.916189	0.286282	-3.2003	0.00137286	0.00276585
ADAM8	1172.04	-1.22901	0.247392	-4.96785	6.7698e-07	1.99316e-06
ADAM9	396.05	-0.538012	0.113441	-4.74265	2.10944e-06	5.92049e-06
ADAMTSL3	1389.34	-2.17819	0.177139	-12.2965	9.45676e-35	1.85748e-33
ADAP1	303.731	-1.08519	0.357921	-3.03193	0.00242998	0.0047186
ADAR	2990.4	-0.0482302	0.172141	-0.280178	0.779341	0.837866
ADARB1	444.603	0.0596494	0.167105	0.356957	0.721124	0.788885
ADAT1	415.14	-0.00327228	0.152845	-0.0214091	0.982919	0.998849
ADAT2	407.472	0.899695	0.21584	4.16833	3.06835e-05	7.59084e-05
ADCK2	306.883	1.35541	0.20774	6.52455	6.82069e-11	2.94436e-10
ADCK3	1762.17	1.21109	0.119129	10.1662	2.8057e-24	3.1612e-23
ADCK4	467.314	0.490055	0.193883	2.52758	0.0114852	0.0201548
ADCY3	793.6	0.90679	0.215196	4.21378	2.51127e-05	6.27134e-05
ADCY6	590.095	-1.02138	0.202181	-5.05178	4.37711e-07	1.31709e-06
ADCY7	2000.6	-1.45461	0.112901	-12.884	5.54163e-38	1.27026e-36
ADD1	2602.85	-0.525023	0.136472	-3.84712	0.000119513	0.00027539
ADD2	844.069	2.53848	0.156958	16.173	7.82006e-59	4.32514e-57
ADD3	750.801	-0.65128	0.131844	-4.93978	7.82094e-07	2.28795e-06
ADH5	487.965	1.63096	0.199677	8.16798	3.13593e-16	2.0802e-15
ADI1	600.29	1.20479	0.109493	11.0034	3.68087e-28	5.13084e-27
ADIPOR1	846.706	0.587242	0.124719	4.70851	2.4954e-06	6.94176e-06
ADIPOR2	544.511	0.554588	0.268468	2.06575	0.0388521	0.061717
ADK	407.222	1.20227	0.13809	8.70642	3.13625e-18	2.40345e-17
ADNP	984.568	-0.0109924	0.202752	-0.054216	0.956763	0.978923
ADNP2	597.34	-0.507651	0.44606	-1.13808	0.255089	0.331683
ADO	342.513	1.39515	0.268222	5.20149	1.97699e-07	6.15628e-07
ADPGK	1842.92	0.0648558	0.155863	0.416108	0.677331	0.75073
ADRB2	310.157	1.31877	0.131843	10.0026	1.48464e-23	1.59605e-22
ADRBK1	10737.5	0.0757788	0.189422	0.400053	0.689117	0.760728
ADRBK2	788.226	-0.114815	0.146104	-0.785843	0.43196	0.519278
ADRM1	575.335	1.77494	0.17722	10.0154	1.30387e-23	1.40979e-22
ADSL	712.721	1.27397	0.100705	12.6505	1.11195e-36	2.39453e-35
ADSS	708.828	0.851812	0.128193	6.64477	3.03687e-11	1.34994e-10
AEBP1	990.622	-0.0155216	0.216119	-0.0718198	0.942745	0.969032
AEBP2	548.058	-0.329584	0.220292	-1.49612	0.134623	0.189795
AEN	539.558	1.58751	0.205826	7.71286	1.23027e-14	7.24951e-14
AES	995.859	0.377972	0.169332	2.23213	0.0256063	0.0421863
AFF1	4080.3	-0.591932	0.128378	-4.61086	4.01011e-06	1.09126e-05
AFF3	729.235	-0.117783	0.13829	-0.851709	0.394376	0.48014
AFF4	1308.17	-1.37389	0.150862	-9.10693	8.47489e-20	7.18606e-19
AFG3L1P	439.347	-0.885446	0.126286	-7.01142	2.35918e-12	1.15059e-11
AFG3L2	1020.98	0.660082	0.221496	2.98011	0.00288146	0.00553333
AFMID	488.084	-0.00654998	0.175385	-0.0373464	0.970209	0.989099
AFTPH	638.789	0.258791	0.195321	1.32495	0.185187	0.251525
AGAP10	617.633	-2.20366	0.44744	-4.92504	8.43432e-07	2.46215e-06
AGAP2	766.305	1.3919	0.177885	7.8247	5.08869e-15	3.07678e-14
AGAP6	498.352	-0.382319	0.148851	-2.56847	0.0102149	0.0180918
AGFG1	993.542	0.250878	0.201462	1.24529	0.213025	0.283731
AGFG2	433.164	0.882061	0.225722	3.90773	9.3167e-05	0.0002174
AGGF1	426.158	1.41459	0.180418	7.84065	4.48204e-15	2.72596e-14
AGO1	835.382	0.29377	0.138152	2.12642	0.033468	0.0538652
AGO2	840.962	-1.44326	0.183267	-7.87519	3.40235e-15	2.09025e-14
AGO3	1648.01	-0.593596	0.135953	-4.3662	1.26428e-05	3.25945e-05
AGO4	1063.63	-0.264738	0.279761	-0.9463	0.343996	0.426971
AGPAT2	343.637	1.63808	0.271176	6.04067	1.53479e-09	5.86671e-09
AGPAT3	660.431	-0.280543	0.164339	-1.7071	0.0878041	0.129404
AGPAT5	492.655	1.54205	0.240011	6.42491	1.31947e-10	5.54393e-10
AGPAT6	1124.31	-0.0828355	0.114039	-0.726375	0.467609	0.55505
AGPS	788.304	1.6371	0.213276	7.67598	1.64158e-14	9.55314e-14
AGRN	403.836	-1.96722	0.259335	-7.58561	3.30918e-14	1.88848e-13
AGTPBP1	929.57	0.184828	0.0880244	2.09974	0.0357517	0.0572727
AGTRAP	468.978	1.42073	0.143464	9.90303	4.03853e-23	4.22918e-22
AHCTF1	1504.1	-0.0334375	0.220644	-0.151545	0.879546	0.918829
AHCY	820.743	2.90458	0.154004	18.8604	2.41267e-79	2.45189e-77
AHCYL1	537.773	0.80819	0.133048	6.07443	1.24427e-09	4.7989e-09
AHCYL2	401.694	-0.970302	0.229213	-4.23319	2.304e-05	5.77891e-05
AHDC1	462.118	-1.09004	0.290372	-3.75395	0.000174071	0.000393413
AHI1	487.902	0.493609	0.258906	1.90652	0.0565831	0.0868663
AHNAK	26559.8	-2.3232	0.0924585	-25.127	2.52333e-139	1.08451e-136
AHR	2953.86	-0.489853	0.215328	-2.27491	0.0229111	0.0380867
AHSA1	586.166	1.15382	0.125948	9.1611	5.13715e-20	4.41581e-19
AHSA2	2130.47	-0.337485	0.14772	-2.28463	0.0223346	0.0372003
AHSP	1649.41	12.1656	1.18892	10.2324	1.41941e-24	1.62861e-23
AIDA	300.44	0.604024	0.238605	2.53148	0.0113582	0.0199493
AIF1	695.055	1.08421	0.166122	6.5266	6.72781e-11	2.90548e-10
AIFM1	343.724	0.648988	0.178055	3.64486	0.000267536	0.000591943
AIG1	346.907	0.726816	0.72397	1.00393	0.315412	0.396547
AIM1	1239.4	0.323152	0.146237	2.20978	0.0271204	0.0444219
AIMP1	309.668	1.2099	0.10525	11.4955	1.38951e-30	2.18155e-29
AIP	455.599	1.16827	0.132037	8.84807	8.90445e-19	7.08441e-18
AK2	1876.99	1.91437	0.109864	17.4249	5.34028e-68	4.06532e-66
AK3	336.023	1.95625	0.190512	10.2684	9.78315e-25	1.13322e-23
AKAP1	671.977	1.06696	0.249254	4.28063	1.86362e-05	4.72431e-05
AKAP10	688.281	-0.713047	0.148787	-4.79239	1.64804e-06	4.67276e-06
AKAP11	671.356	-0.152397	0.186434	-0.817432	0.413682	0.500337
AKAP13	5117.88	-1.22008	0.11857	-10.2899	7.82313e-25	9.12847e-24
AKAP17A	2187.04	0.447064	0.133432	3.35051	0.000806629	0.00167733
AKAP2	487.169	1.48517	0.203403	7.30162	2.84322e-13	1.49938e-12
AKAP5	302.607	-2.56733	0.327395	-7.8417	4.44484e-15	2.70492e-14
AKAP8	866.84	-0.217478	0.179254	-1.21324	0.225039	0.297629
AKAP8L	1471.4	-0.450595	0.196785	-2.28979	0.0220337	0.0367425
AKAP9	3238.08	-1.49509	0.102833	-14.539	6.85674e-48	2.40979e-46
AKIRIN1	514.244	1.08643	0.193028	5.62833	1.81959e-08	6.30324e-08
AKIRIN2	445.672	-0.750015	0.142895	-5.24871	1.53168e-07	4.82127e-07
AKNA	3594.11	-0.504773	0.108005	-4.67363	2.95926e-06	8.16826e-06
AKR1A1	818.721	1.81578	0.129226	14.0512	7.57692e-45	2.34703e-43
AKR1B1	518.955	-0.0729481	0.186451	-0.391245	0.695616	0.766549
AKR7A2	325.159	2.72419	0.20559	13.2506	4.47745e-40	1.15031e-38
AKT1	1987.14	0.688921	0.11669	5.90387	3.55062e-09	1.31483e-08
AKT2	1797.47	-0.0115932	0.0923353	-0.125555	0.900084	0.935264
AL133458.1	409.324	-1.89843	0.281862	-6.73531	1.63585e-11	7.42194e-11
AL162389.1	761.909	-2.07328	0.387812	-5.34609	8.98763e-08	2.8962e-07
AL512503.1	525.173	-1.29897	0.425585	-3.0522	0.00227173	0.00443174
AL590867.1	698.431	-2.27673	0.250705	-9.08133	1.07258e-19	9.05007e-19
AL592183.1	374.149	-0.037779	0.172916	-0.218482	0.827054	0.876797
AL627309.1	342.781	-2.28498	0.343223	-6.65742	2.78669e-11	1.24113e-10
AL844853.2	547.251	-2.41345	0.484614	-4.98016	6.35321e-07	1.87721e-06
ALAD	965.438	0.483287	0.137667	3.51054	0.000447197	0.000960536
ALAS1	400.19	2.46126	0.136235	18.0663	5.86954e-73	5.10923e-71
ALAS2	2399	8.61867	0.575799	14.9682	1.18499e-50	4.65646e-49
ALCAM	1090.91	1.95618	0.131091	14.9222	2.36278e-50	9.16243e-49
ALDH16A1	964.719	0.996272	0.279096	3.56965	0.000357465	0.000777737
ALDH18A1	719.166	2.96132	0.108077	27.4	2.73937e-165	1.88377e-162
ALDH3A2	302.445	0.588716	0.520819	1.13037	0.258322	0.335275
ALDH3B1	1051.07	0.785803	0.268342	2.92837	0.00340749	0.00647179
ALDH5A1	359.17	2.14791	0.175248	12.2564	1.55199e-34	3.0213e-33
ALDH6A1	696.519	0.0754131	0.123852	0.608898	0.542592	0.627096
ALDH8A1	119823	-0.161486	0.346569	-0.465957	0.641246	0.71865
ALDOA	4603.12	1.522	0.152914	9.95329	2.43989e-23	2.58791e-22
ALG12	306.861	1.17275	0.262797	4.46259	8.09755e-06	2.13458e-05
ALG13	418.137	-0.294756	0.222	-1.32773	0.184267	0.250439
ALG14	429.517	-1.10882	0.219622	-5.04876	4.44693e-07	1.33712e-06
ALG9	377.04	0.0653231	0.152446	0.428499	0.668288	0.742822
ALKBH5	609.227	1.41991	0.127925	11.0995	1.26092e-28	1.80394e-27
ALMS1	1163.23	0.0157397	0.16685	0.094334	0.924844	0.954884
ALOX12P2	745.114	-1.18271	0.153746	-7.69267	1.44095e-14	8.4164e-14
ALOX5	782.375	-1.3019	0.215924	-6.02945	1.64523e-09	6.26915e-09
ALOX5AP	339.786	2.04846	0.0987014	20.7541	1.12655e-95	1.73438e-93
ALPK1	569.668	-0.233434	0.128537	-1.81608	0.0693581	0.104419
ALS2	885.207	0.851783	0.125711	6.77573	1.23782e-11	5.66967e-11
ALYREF	715.713	2.25566	0.151752	14.8641	5.63975e-50	2.15459e-48
AMBRA1	933.169	-0.51392	0.187691	-2.73812	0.00617908	0.0113316
AMD1	1409.19	1.7211	0.116031	14.8331	8.95488e-50	3.37731e-48
AMDHD1	645.112	-2.00466	0.854875	-2.34498	0.0190283	0.0321239
AMDHD2	318.631	-0.83706	0.356083	-2.35074	0.018736	0.0316564
AMFR	1271.96	-0.251244	0.128402	-1.95669	0.0503834	0.0780866
AMMECR1L	462.521	0.70337	0.0988851	7.113	1.13543e-12	5.69235e-12
AMOTL1	328.429	1.16774	0.129684	9.00457	2.16522e-19	1.79032e-18
AMPD2	1664.08	-0.762286	0.139162	-5.47769	4.30924e-08	1.43479e-07
AMPD3	657.798	0.290643	0.10578	2.74761	0.00600312	0.011026
AMT	462.078	-0.567313	0.149553	-3.7934	0.0001486	0.00033848
ANAPC1	1060.59	0.869627	0.156048	5.5728	2.50675e-08	8.57332e-08
ANAPC15	312.697	0.796042	0.130086	6.11935	9.39607e-10	3.66014e-09
ANAPC16	620.221	1.23669	0.209429	5.90507	3.52487e-09	1.30577e-08
ANAPC2	912.536	-0.0750375	0.207655	-0.361356	0.717833	0.786035
ANAPC4	541.142	0.188477	0.185244	1.01745	0.308938	0.38962
ANAPC5	2178.96	0.266243	0.170847	1.55837	0.119146	0.170386
ANAPC7	641.125	0.502889	0.121041	4.15471	3.25696e-05	8.03241e-05
ANGEL1	339.453	-0.129704	0.121261	-1.06962	0.284788	0.364104
ANGEL2	529.011	0.0567786	0.0827345	0.686275	0.49254	0.579178
ANGPT1	458.404	1.29945	0.183501	7.08142	1.42681e-12	7.08936e-12
ANK1	3213.47	3.28667	0.211263	15.5572	1.42086e-54	6.49942e-53
ANKFY1	887.037	-0.59691	0.105964	-5.63315	1.76946e-08	6.13926e-08
ANKH	583.172	-0.75465	0.201849	-3.73868	0.000184988	0.0004169
ANKHD1	2645.81	-0.602404	0.152785	-3.94284	8.05239e-05	0.00018916
ANKIB1	517.976	0.137334	0.221555	0.619864	0.535347	0.620044
ANKLE1	425.199	0.916965	0.21786	4.20896	2.56552e-05	6.40217e-05
ANKLE2	3495.2	-0.17758	0.0980934	-1.81032	0.0702464	0.10561
ANKMY1	1008.82	-0.364064	0.217958	-1.67034	0.0948519	0.138888
ANKRD10	1882.29	0.259945	0.330202	0.787232	0.431146	0.51836
ANKRD11	4045.9	-1.32089	0.0934327	-14.1373	2.23705e-45	7.10006e-44
ANKRD12	1244.02	-0.627757	0.235111	-2.67005	0.00758405	0.01371
ANKRD13A	1045.3	-0.56945	0.0699257	-8.14365	3.83549e-16	2.52477e-15
ANKRD13C	412.793	0.179808	0.222527	0.808027	0.419075	0.506029
ANKRD13D	1629.68	0.12765	0.128509	0.993314	0.320557	0.401963
ANKRD17	2010.74	0.17782	0.122549	1.45102	0.146775	0.205022
ANKRD27	1509.96	0.593932	0.0918006	6.4698	9.81337e-11	4.17508e-10
ANKRD28	2278.92	0.0245959	0.194884	0.126208	0.899567	0.934902
ANKRD30BL	20175.1	-2.8558	1.47013	-1.94254	0.0520717	0.0805277
ANKRD36	3332.16	-0.558741	0.0970984	-5.75438	8.69601e-09	3.10916e-08
ANKRD36B	1728.97	-0.253085	0.117975	-2.14525	0.0319326	0.0516155
ANKRD36C	2446.66	-0.691232	0.163314	-4.23255	2.31062e-05	5.7948e-05
ANKRD40	552.216	-1.05276	0.186802	-5.63568	1.74372e-08	6.05299e-08
ANKRD44	1090.26	-0.994603	0.186	-5.34733	8.92619e-08	2.8773e-07
ANKRD50	474.407	-0.068967	0.0832352	-0.82858	0.407342	0.493857
ANKRD52	697.758	-0.512147	0.320735	-1.59679	0.110312	0.158921
ANKRD54	456.668	-0.443862	0.139461	-3.1827	0.0014591	0.00293017
ANKS1A	644.619	0.0632093	0.152419	0.414708	0.678356	0.751543
ANKS3	502.891	-0.986213	0.182556	-5.40225	6.58102e-08	2.15024e-07
ANKZF1	918.633	-0.507837	0.147144	-3.4513	0.000557902	0.00118447
ANLN	681.515	2.42541	0.22688	10.6902	1.13077e-26	1.46073e-25
ANO6	1150.94	0.483287	0.137526	3.51416	0.000441143	0.000948196
ANO7	525.335	2.17319	0.294796	7.37184	1.68286e-13	9.01283e-13
ANP32A	1743.56	1.14597	0.0704268	16.2718	1.56405e-59	8.86441e-58
ANP32B	649.711	0.352878	0.174539	2.02177	0.0432002	0.0679594
ANP32E	800.633	2.28764	0.215552	10.613	2.59415e-26	3.28365e-25
ANPEP	1326.02	-0.618835	0.183565	-3.37121	0.000748391	0.00156284
ANTXR2	2359.25	-0.18091	0.0678725	-2.66544	0.00768876	0.0138799
ANXA1	4216.2	0.512941	0.159801	3.20987	0.00132794	0.00268189
ANXA11	1897.91	0.623663	0.293558	2.1245	0.0336285	0.0540898
ANXA2	1691.43	-0.551795	0.103164	-5.3487	8.85895e-08	2.85697e-07
ANXA2R	390.742	1.25444	0.132366	9.47702	2.61656e-21	2.45921e-20
ANXA4	421.767	0.458417	0.13429	3.41363	0.000641046	0.00134988
ANXA5	535.27	-1.36848	0.178529	-7.66532	1.78379e-14	1.03457e-13
ANXA6	2160.99	1.12947	0.132716	8.51046	1.73245e-17	1.26336e-16
ANXA7	815.153	0.545315	0.114166	4.77652	1.78355e-06	5.03968e-06
AOAH	1133.07	-0.776754	0.108382	-7.16684	7.6748e-13	3.90941e-12
AP000347.2	1687.06	-0.486841	0.109035	-4.465	8.00672e-06	2.11253e-05
AP000679.2	352.326	0.0292265	0.50438	0.0579454	0.953792	0.97661
AP000974.1	451.72	-2.6121	0.25897	-10.0865	6.34026e-24	6.96112e-23
AP1B1	1904.1	0.391824	0.155851	2.5141	0.0119336	0.0208866
AP1G1	1251.11	-0.938472	0.0780296	-12.0271	2.55919e-33	4.71393e-32
AP1G2	1788.35	-0.457262	0.107497	-4.25371	2.10257e-05	5.29817e-05
AP1M1	456.516	0.333291	0.199985	1.66658	0.0955985	0.139842
AP1S2	556.964	-0.0635328	0.214677	-0.295946	0.767271	0.827823
AP1S3	1298.65	-0.795607	0.221578	-3.59063	0.000329874	0.000721741
AP2A1	1313.49	0.15862	0.155971	1.01699	0.30916	0.389822
AP2A2	839.385	-0.825449	0.164567	-5.01589	5.27883e-07	1.57305e-06
AP2B1	1270.92	0.0402938	0.227949	0.176767	0.859692	0.902866
AP2M1	1324.93	1.2036	0.127815	9.41668	4.65574e-21	4.29169e-20
AP2S1	381.402	1.63902	0.205135	7.98997	1.34968e-15	8.53582e-15
AP3B1	1255.23	-0.786852	0.256875	-3.06317	0.00219002	0.00428208
AP3D1	1746.54	0.38149	0.145839	2.61583	0.00890098	0.0159136
AP3S2	343.826	-0.749666	0.198146	-3.7834	0.000154701	0.0003516
AP4B1	620.247	-0.190345	0.117827	-1.61547	0.106209	0.153739
AP4E1	381.511	-0.681593	0.190816	-3.57199	0.000354276	0.000771124
AP4M1	355.89	-0.123877	0.238083	-0.52031	0.602847	0.683675
AP5B1	978.753	0.484084	0.198942	2.43329	0.0149623	0.0257399
AP5Z1	1024.84	-0.285943	0.235271	-1.21538	0.224223	0.296692
APAF1	1309.92	0.257424	0.158089	1.62835	0.103451	0.150095
APBA3	309.243	0.393733	0.152377	2.58394	0.00976786	0.0173499
APBB1IP	649.738	-0.0282102	0.134819	-0.209245	0.834257	0.88242
APBB3	527.809	-1.13922	0.0970684	-11.7362	8.30973e-32	1.39829e-30
APC	688.814	-0.41301	0.186314	-2.21674	0.0266406	0.0437089
APEH	1049.64	1.68423	0.178978	9.41025	4.94977e-21	4.55458e-20
APEX1	1360.44	2.53875	0.0962624	26.3732	2.77944e-153	1.54972e-150
APH1A	784.76	1.22359	0.177712	6.88523	5.76959e-12	2.72372e-11
API5	545.507	1.2227	0.107706	11.3523	7.22698e-30	1.09788e-28
APLP2	5230.61	-0.103072	0.152238	-0.677044	0.498378	0.584743
APMAP	691.831	2.25537	0.079208	28.474	2.46259e-178	2.1168e-175
APOBEC3C	409.907	1.08458	0.106611	10.1732	2.61126e-24	2.94695e-23
APOBEC3G	329.622	0.730436	0.131642	5.54867	2.87856e-08	9.793e-08
APOBR	987.575	-0.519393	0.166682	-3.11607	0.00183281	0.00362207
APOL6	732.879	-0.299191	0.134033	-2.23222	0.0256006	0.0421827
APP	711.182	0.991783	0.147305	6.73287	1.66345e-11	7.54221e-11
APPBP2	441.733	0.474494	0.168946	2.80855	0.00497649	0.00923993
APPL1	1138.88	0.843251	0.32207	2.61822	0.00883891	0.0158081
APPL2	410.001	-1.09527	0.135101	-8.10706	5.18607e-16	3.3793e-15
APRT	614.582	2.13638	0.189731	11.26	2.06662e-29	3.05404e-28
AQP1	327.809	2.45962	0.180002	13.6644	1.65644e-42	4.67475e-41
AQR	721.855	0.406383	0.241321	1.684	0.092182	0.135363
ARAF	750.935	0.111122	0.146067	0.760761	0.4468	0.534533
ARAP1	2530.13	-1.40347	0.155985	-8.99747	2.30984e-19	1.90151e-18
ARAP2	642.437	-0.435052	0.196042	-2.21918	0.0264746	0.0434774
ARCN1	755.811	1.26954	0.142006	8.94008	3.88883e-19	3.15356e-18
AREG	818.79	4.25101	0.217436	19.5506	4.0742e-85	4.72196e-83
AREL1	765.953	-0.511337	0.225864	-2.26391	0.0235795	0.0390751
ARF1	1994.49	0.963517	0.108123	8.91133	5.04225e-19	4.06017e-18
ARF3	944.031	1.06053	0.191735	5.53124	3.17967e-08	1.07659e-07
ARF4	529.722	0.475515	0.102934	4.61963	3.84434e-06	1.04836e-05
ARF5	573.502	0.911457	0.107685	8.46413	2.58077e-17	1.86158e-16
ARF6	1161.18	0.408111	0.162002	2.51917	0.0117631	0.0206003
ARFGAP1	1513.92	0.102639	0.174416	0.588471	0.556216	0.64026
ARFGAP2	1893.5	-0.133373	0.119923	-1.11216	0.266071	0.343861
ARFGAP3	352.517	0.323414	0.291399	1.10987	0.267056	0.344895
ARFGEF1	1950.9	0.128653	0.152698	0.84253	0.399491	0.485508
ARFGEF2	1583.86	-0.725545	0.190724	-3.80417	0.000142279	0.000324836
ARFIP2	381.231	0.869382	0.0940244	9.24634	2.32315e-20	2.04203e-19
ARFRP1	664.782	0.0900753	0.202484	0.444851	0.656428	0.732243
ARGLU1	4380.57	0.523775	0.178888	2.92795	0.00341206	0.00647986
ARHGAP1	817.622	0.0611381	0.109319	0.559264	0.575981	0.658872
ARHGAP11A	815.534	1.88951	0.197702	9.55739	1.20769e-21	1.15721e-20
ARHGAP11B	677.763	0.622305	0.138098	4.50624	6.59857e-06	1.75786e-05
ARHGAP15	1189.33	0.346355	0.197109	1.75717	0.0788883	0.117346
ARHGAP17	887.675	-1.38545	0.148487	-9.33042	1.05453e-20	9.48339e-20
ARHGAP19	327.082	1.58495	0.315064	5.03056	4.89045e-07	1.46472e-06
ARHGAP21	755.57	-1.07506	0.167821	-6.40598	1.49406e-10	6.2482e-10
ARHGAP22	476.773	0.649212	0.244217	2.65834	0.00785265	0.0141522
ARHGAP23	812.512	0.128991	0.185893	0.693899	0.487746	0.574621
ARHGAP25	1182.04	0.0487726	0.084765	0.575386	0.56503	0.648416
ARHGAP26	1588.6	-3.22414	0.170241	-18.9386	5.48117e-80	5.65383e-78
ARHGAP27	1778.66	-0.828005	0.18339	-4.515	6.33161e-06	1.69023e-05
ARHGAP30	1721.84	0.424926	0.0829243	5.12426	2.98702e-07	9.15092e-07
ARHGAP33	1031.22	-0.746376	0.43152	-1.72964	0.0836941	0.123842
ARHGAP35	994.337	0.659557	0.104105	6.33548	2.36602e-10	9.72717e-10
ARHGAP4	5851.33	0.443383	0.188716	2.34947	0.0188004	0.0317573
ARHGAP5	724.893	-0.370547	0.149545	-2.47782	0.0132187	0.0229761
ARHGAP9	1532.76	0.69088	0.157825	4.3775	1.20046e-05	3.10499e-05
ARHGDIA	1509.9	-0.352807	0.202309	-1.7439	0.0811771	0.120438
ARHGDIB	3852.53	1.81772	0.111495	16.3032	9.37234e-60	5.40088e-58
ARHGEF1	5375.31	-0.422325	0.11616	-3.63573	0.000277198	0.000611941
ARHGEF10L	343.935	-2.20909	0.2335	-9.46076	3.05708e-21	2.85394e-20
ARHGEF11	413.747	-1.37538	0.168438	-8.16545	3.20234e-16	2.12289e-15
ARHGEF12	1950.15	-1.63816	0.186205	-8.79764	1.39724e-18	1.09768e-17
ARHGEF17	532.481	0.396288	0.243362	1.62838	0.103443	0.150094
ARHGEF18	2075.74	1.49612	0.139517	10.7236	7.89015e-27	1.02567e-25
ARHGEF2	3900.04	-0.256966	0.117568	-2.18569	0.0288386	0.0470198
ARHGEF3	373.553	-0.128298	0.120124	-1.06805	0.285498	0.36483
ARHGEF40	1447.04	-0.146827	0.0976817	-1.50311	0.13281	0.187559
ARHGEF6	1730.73	1.06774	0.0673221	15.8602	1.19548e-56	6.00066e-55
ARHGEF7	1092.29	-0.837964	0.0899929	-9.31145	1.26105e-20	1.12816e-19
ARID1A	2182.17	-0.863437	0.146504	-5.8936	3.77882e-09	1.39447e-08
ARID1B	2681.19	-0.461904	0.0975452	-4.73528	2.18748e-06	6.12567e-06
ARID2	1476.02	-0.978803	0.196245	-4.98765	6.11197e-07	1.808e-06
ARID3A	994.19	-0.54774	0.232701	-2.35384	0.0185806	0.0314066
ARID3B	436.43	-2.11768	0.133562	-15.8554	1.28939e-56	6.45636e-55
ARID4A	1023.62	-1.11185	0.243592	-4.56438	5.00979e-06	1.35189e-05
ARID4B	1706.88	-1.34913	0.135894	-9.92782	3.1507e-23	3.30783e-22
ARID5A	609.799	-0.272266	0.20278	-1.34266	0.179381	0.244637
ARID5B	454.156	-2.93129	0.144904	-20.2292	5.41596e-91	7.60076e-89
ARIH1	1602.59	-1.463	0.303242	-4.82452	1.40339e-06	4.01052e-06
ARIH2	1299.07	-1.00302	0.157289	-6.37689	1.80719e-10	7.51206e-10
ARL16	310.698	0.221053	0.176702	1.25099	0.210936	0.281403
ARL17A	329.923	-1.14072	0.290603	-3.92535	8.66045e-05	0.000202499
ARL2	431.209	1.39817	0.107892	12.9589	2.09188e-38	4.90962e-37
ARL4A	567.271	1.14054	0.219273	5.20144	1.97747e-07	6.15682e-07
ARL4C	443.055	-0.247445	0.167416	-1.47802	0.139401	0.195838
ARL5A	533.907	1.07933	0.14584	7.40077	1.35396e-13	7.3236e-13
ARL5B	569.943	0.0951753	0.155666	0.611406	0.540931	0.625562
ARL6IP1	1229.36	1.50266	0.182194	8.24762	1.61574e-16	1.09647e-15
ARL6IP4	1298.87	1.55836	0.123102	12.6591	9.96211e-37	2.14977e-35
ARL6IP5	660.129	0.77743	0.135763	5.72637	1.02603e-08	3.64071e-08
ARL8B	800.717	0.13923	0.234563	0.593573	0.552798	0.637
ARMC10	494.349	1.43431	0.216863	6.61387	3.74398e-11	1.65286e-10
ARMC5	557.012	0.300646	0.238016	1.26313	0.206541	0.27647
ARMC6	425.899	1.66766	0.244551	6.81926	9.1508e-12	4.23497e-11
ARMC8	895.23	-0.165951	0.134484	-1.23398	0.21721	0.288541
ARMCX3	349.441	0.422645	0.160109	2.63973	0.00829729	0.014895
ARNT	718.048	-1.01703	0.224847	-4.5232	6.09121e-06	1.62901e-05
ARPC1B	2356.86	0.749018	0.123838	6.04837	1.46316e-09	5.6033e-09
ARPC2	2587.51	0.667512	0.130287	5.1234	3.00077e-07	9.19031e-07
ARPC3	1534.17	1.10779	0.178596	6.20276	5.54797e-10	2.19978e-09
ARPC4	1230.58	0.813746	0.114034	7.13602	9.6072e-13	4.853e-12
ARPC4-TTLL3	387.239	0.0661743	0.192201	0.344298	0.730622	0.797331
ARPC5	1390.53	1.02412	0.105536	9.70399	2.89942e-22	2.88126e-21
ARPP19	954.531	0.559325	0.143971	3.88497	0.000102342	0.000237707
ARRB1	1172.3	-0.105535	0.127211	-0.829608	0.40676	0.493181
ARRB2	1696.55	-0.88767	0.0997817	-8.89612	5.78347e-19	4.64253e-18
ARRDC1	954.472	0.385134	0.220144	1.74947	0.08021	0.119131
ARRDC2	1031.5	-0.879768	0.194485	-4.52357	6.08042e-06	1.62675e-05
ARRDC3	1947.59	0.314633	0.111737	2.81584	0.00486496	0.00904507
ARRDC4	607.341	0.471176	0.135217	3.48459	0.000492895	0.0010534
ARSB	608.414	0.403495	0.256397	1.57371	0.115554	0.165651
ARSD	712.711	-0.458487	0.14677	-3.12384	0.00178509	0.00353522
ASAH1	743.487	-0.379433	0.102941	-3.68591	0.000227886	0.000508248
ASAP1	744.644	-1.31685	0.23972	-5.49327	3.9455e-08	1.31879e-07
ASB1	484.242	0.511968	0.152157	3.36473	0.0007662	0.0015976
ASCC2	729.588	-0.406787	0.132425	-3.07183	0.00212753	0.00416461
ASCC3	1304.32	0.644727	0.0766935	8.40654	4.22272e-17	2.98953e-16
ASH1L	1997.53	-1.43558	0.0974304	-14.7344	3.87483e-49	1.41985e-47
ASH2L	599.457	0.0372096	0.207703	0.179149	0.857821	0.901475
ASL	408.123	0.561814	0.240341	2.33757	0.0194096	0.0326847
ASMTL	391.522	-0.243038	0.137018	-1.77377	0.076102	0.113626
ASNA1	329.303	2.07397	0.126065	16.4516	8.16454e-61	4.84007e-59
ASPH	923.477	-0.253221	0.187389	-1.35131	0.176596	0.241254
ASPM	1593.39	2.83527	0.124737	22.7299	2.27002e-114	5.57507e-112
ASPSCR1	607.638	0.115025	0.204964	0.561195	0.574664	0.657643
ASTN2	960.653	-2.46629	0.362346	-6.80644	1.00044e-11	4.61313e-11
ASUN	320.066	2.17793	0.245117	8.88525	6.3776e-19	5.1115e-18
ASXL1	1496.77	0.168695	0.10695	1.57733	0.114719	0.164568
ASXL2	544.159	-0.354619	0.269493	-1.31587	0.188217	0.254985
ATAD1	344.299	1.18485	0.188403	6.28893	3.1967e-10	1.29717e-09
ATAD2	1686.61	0.580836	0.203872	2.84903	0.0043853	0.008211
ATAD2B	2129.47	-2.02277	0.142086	-14.2362	5.45968e-46	1.78783e-44
ATAD3A	496.077	1.49189	0.269757	5.5305	3.19328e-08	1.08102e-07
ATAD3B	951.76	0.243037	0.215147	1.12963	0.258632	0.335634
ATAD5	894.591	1.18683	0.146817	8.08373	6.28168e-16	4.06751e-15
ATE1	417.761	-0.19614	0.172216	-1.13892	0.254737	0.331288
ATF2	578.24	0.341471	0.205102	1.66488	0.095936	0.140266
ATF3	466.14	-0.101509	0.141636	-0.716688	0.473567	0.560638
ATF4	2399.18	0.384643	0.0949136	4.05256	5.06602e-05	0.000121951
ATF6	1111.57	0.388864	0.123637	3.1452	0.00165975	0.00330571
ATF6B	2073.59	-0.55112	0.109923	-5.01371	5.33915e-07	1.58965e-06
ATF7IP	2181.08	-1.28627	0.16758	-7.67554	1.64726e-14	9.58345e-14
ATF7IP2	480.975	1.00593	0.165967	6.06102	1.35262e-09	5.19831e-09
ATG10	328.489	-1.04291	0.273349	-3.81529	0.000136023	0.000311448
ATG12	391.144	-0.209596	0.145997	-1.43562	0.151112	0.210282
ATG13	800.495	-0.761714	0.160438	-4.74771	2.05736e-06	5.78168e-06
ATG14	608.688	-0.145126	0.136821	-1.0607	0.288824	0.36826
ATG16L1	544.504	-0.558736	0.102258	-5.46397	4.65614e-08	1.54506e-07
ATG16L2	4920.82	-1.08926	0.0871636	-12.4967	7.78344e-36	1.61379e-34
ATG2A	1079.06	-1.20274	0.159497	-7.54081	4.67046e-14	2.62467e-13
ATG2B	1241.67	-1.06502	0.212086	-5.02167	5.12251e-07	1.52978e-06
ATG3	691.179	0.961249	0.255258	3.7658	0.000166017	0.000376076
ATG4B	1072.25	-0.165151	0.150061	-1.10056	0.271089	0.349295
ATG4D	361.492	0.279514	0.208063	1.34341	0.179138	0.244322
ATG7	687.766	-0.196429	0.215848	-0.910032	0.362806	0.447007
ATG9A	533.031	-0.503803	0.204768	-2.46036	0.0138799	0.0240402
ATHL1	1400.13	-1.68782	0.271457	-6.21763	5.04719e-10	2.00972e-09
ATIC	408.028	-0.158964	0.135402	-1.17402	0.240389	0.315071
ATL2	546.724	-0.545099	0.172997	-3.15092	0.00162754	0.00324628
ATL3	1090.98	1.25298	0.151133	8.29058	1.12697e-16	7.73177e-16
ATM	1927.49	-0.983167	0.224114	-4.3869	1.14976e-05	2.98321e-05
ATMIN	379.718	0.800072	0.131172	6.09942	1.06455e-09	4.12813e-09
ATN1	1008.94	-2.00792	0.269393	-7.45348	9.09101e-14	4.9787e-13
ATP10A	334.32	-1.17755	0.38008	-3.09816	0.00194723	0.00383315
ATP11A	1288.41	-1.25976	0.16706	-7.54076	4.67254e-14	2.62512e-13
ATP11B	1608.71	-0.367257	0.170267	-2.15694	0.0310103	0.0502429
ATP11C	484.386	0.939863	0.258147	3.64081	0.000271786	0.000600829
ATP13A1	1094.05	-0.884137	0.199197	-4.43852	9.05815e-06	2.37323e-05
ATP13A2	470.15	-0.0982401	0.201596	-0.487311	0.626038	0.70513
ATP13A3	1381.46	0.605995	0.120303	5.03722	4.7233e-07	1.4161e-06
ATP1A1	1498.44	-0.381559	0.161682	-2.35994	0.018278	0.0309433
ATP1B1	348.372	-0.189729	0.322833	-0.587699	0.556734	0.640627
ATP1B3	586.013	0.623863	0.175973	3.54522	0.000392289	0.00084876
ATP2A2	2435.72	-0.615862	0.194778	-3.16186	0.00156763	0.00313466
ATP2A3	5829.46	0.284043	0.215113	1.32044	0.186688	0.253264
ATP2B1	1551.72	-2.76258	0.224234	-12.3201	7.06215e-35	1.39686e-33
ATP2B4	2850.15	-0.533684	0.164698	-3.24038	0.0011937	0.00242477
ATP2C1	1410.66	0.484892	0.264958	1.83007	0.0672391	0.10157
ATP5A1	3238.15	2.02317	0.108716	18.6097	2.68195e-77	2.58545e-75
ATP5B	2432.6	1.74921	0.147673	11.8452	2.27986e-32	3.94908e-31
ATP5C1	823.401	0.539028	0.220762	2.44167	0.0146194	0.0252154
ATP5E	1023.75	0.966815	0.398444	2.42648	0.0152462	0.0261854
ATP5F1	1065.51	2.14353	0.207754	10.3176	5.86485e-25	6.88628e-24
ATP5G2	1544.02	2.0213	0.098849	20.4484	6.21234e-93	9.08941e-91
ATP5G3	609.062	2.29914	0.162045	14.1883	1.08194e-45	3.4985e-44
ATP5H	641.092	1.82014	0.194867	9.34042	9.59568e-21	8.65205e-20
ATP5I	422.652	2.00952	0.209069	9.61172	7.13503e-22	6.94319e-21
ATP5J2	474.157	1.90621	0.229585	8.30284	1.01649e-16	7.00873e-16
ATP5L	755.32	1.82401	0.232994	7.82856	4.93506e-15	2.99002e-14
ATP5O	694.581	2.17477	0.152108	14.2975	2.26688e-46	7.54286e-45
ATP6AP1	811.591	0.735176	0.108086	6.80177	1.03343e-11	4.76312e-11
ATP6AP2	661.825	1.03471	0.200708	5.1553	2.53227e-07	7.79776e-07
ATP6V0A1	1288.25	-2.26638	0.131768	-17.1998	2.66322e-66	1.86245e-64
ATP6V0A2	1573.71	-0.221175	0.123222	-1.79493	0.0726647	0.108873
ATP6V0B	875.666	0.912573	0.180435	5.05763	4.24501e-07	1.27977e-06
ATP6V0D1	950.799	0.113277	0.117159	0.966863	0.333613	0.416284
ATP6V0E1	502.675	1.24119	0.088217	14.0698	5.82705e-45	1.81589e-43
ATP6V1A	1056.77	0.134328	0.139655	0.961852	0.336124	0.418835
ATP6V1B2	1264.06	0.198346	0.149371	1.32787	0.184221	0.25041
ATP6V1C1	477.319	1.25241	0.182258	6.87166	6.34601e-12	2.98559e-11
ATP6V1D	329.569	0.293719	0.183061	1.60449	0.108606	0.15677
ATP6V1E1	435.948	0.788318	0.192365	4.09803	4.16684e-05	0.000101382
ATP6V1G1	600.514	0.954219	0.113222	8.4279	3.51937e-17	2.51314e-16
ATP6V1H	396.042	0.011681	0.170255	0.0686091	0.945301	0.970323
ATP7A	318.743	0.0299136	0.177184	0.168827	0.865932	0.907825
ATP8A1	612.724	0.421426	0.315514	1.33568	0.181654	0.247361
ATP8B2	888.185	0.0191118	0.113045	0.169064	0.865747	0.907723
ATP8B4	4306.01	-0.111296	0.212532	-0.523666	0.600511	0.681438
ATP9B	1935.48	-1.56676	0.170304	-9.19978	3.58689e-20	3.11832e-19
ATPAF2	305.915	0.4874	0.110679	4.40371	1.06415e-05	2.76909e-05
ATPIF1	420.008	2.24383	0.178196	12.5919	2.34001e-36	4.97163e-35
ATR	1005.76	-0.131021	0.227201	-0.576674	0.56416	0.647489
ATRAID	402.219	1.7085	0.151386	11.2857	1.54452e-29	2.2973e-28
ATRN	589.381	0.660056	0.127918	5.16001	2.46938e-07	7.6137e-07
ATRX	1369.85	-0.207148	0.18538	-1.11742	0.263813	0.341335
ATXN1	372.241	-1.52993	0.733325	-2.08629	0.0369522	0.0590445
ATXN10	589.373	0.836511	0.205806	4.06457	4.81218e-05	0.000116207
ATXN1L	587.141	-0.549435	0.140756	-3.90345	9.48305e-05	0.000221107
ATXN2	922.937	-1.50685	0.199064	-7.56969	3.74117e-14	2.12432e-13
ATXN2L	1841.1	-1.35281	0.163722	-8.26282	1.42267e-16	9.68319e-16
ATXN3	788.443	-0.903798	0.154952	-5.83275	5.45227e-09	1.98728e-08
ATXN7	1121.61	-1.14518	0.215573	-5.31227	1.08269e-07	3.4581e-07
ATXN7L3	943.158	0.0537132	0.249992	0.21486	0.829876	0.879003
ATXN7L3B	944.329	1.52505	0.0909619	16.7658	4.34245e-63	2.72294e-61
AUH	339.679	-0.168003	0.179999	-0.933353	0.350638	0.434011
AUP1	1320.8	0.693253	0.101727	6.81482	9.43808e-12	4.36331e-11
AURKAIP1	349.703	1.98522	0.150231	13.2145	7.2392e-40	1.83696e-38
AURKB	399.854	1.53555	0.141486	10.853	1.92954e-27	2.58651e-26
AUTS2	1203.52	-0.796695	0.288334	-2.7631	0.00572554	0.0105425
AVL9	917.598	0.373316	0.119966	3.11184	0.00185924	0.00367184
AXIN1	689.993	0.0879221	0.17801	0.493918	0.621364	0.701014
AZI1	586.775	0.873286	0.196963	4.43375	9.26076e-06	2.4251e-05
AZI2	324.599	0.681463	0.23534	2.89565	0.00378372	0.00714163
AZIN1	1304.8	0.432176	0.109759	3.9375	8.23361e-05	0.000193132
AZU1	6449.69	4.43604	0.296812	14.9456	1.66282e-50	6.48469e-49
B2M	10122.8	0.874158	0.148391	5.8909	3.84096e-09	1.4165e-08
B3GALNT2	319.83	0.429849	0.132638	3.24077	0.00119206	0.00242191
B3GALT6	301.975	2.03616	0.298504	6.82121	9.02741e-12	4.18037e-11
B3GAT3	473.692	0.442859	0.147043	3.01177	0.00259727	0.00502547
B3GNT2	699.001	2.32704	0.131338	17.718	3.04594e-70	2.47393e-68
B3GNT5	330.196	0.687136	0.191293	3.59207	0.000328066	0.000718318
B3GNTL1	1045.68	0.599194	0.157157	3.81272	0.000137446	0.000314394
B4GALT1	630.37	-1.18334	0.102631	-11.5301	9.30873e-31	1.48064e-29
B4GALT5	813.013	1.76651	0.119204	14.8193	1.09982e-49	4.13285e-48
BABAM1	658.598	0.741366	0.102187	7.25496	4.0178e-13	2.09629e-12
BACH1	1522.71	-0.838001	0.133739	-6.26593	3.70613e-10	1.49477e-09
BAG1	1159.68	-0.382551	0.226137	-1.69168	0.0907078	0.133369
BAG4	372.041	0.508837	0.25587	1.98865	0.0467395	0.0729597
BAG5	446.521	0.903527	0.0999617	9.03873	1.58498e-19	1.32114e-18
BAG6	1720.25	0.0793217	0.126297	0.628059	0.529965	0.614914
BAHCC1	784.702	1.66789	0.255349	6.53181	6.49797e-11	2.80975e-10
BAHD1	469.322	0.0473114	0.122192	0.38719	0.698615	0.76907
BANF1	334.254	1.96503	0.235166	8.35594	6.49111e-17	4.52404e-16
BANP	743.931	-1.17575	0.156153	-7.52945	5.09534e-14	2.84715e-13
BAP1	1298.4	0.304556	0.147092	2.07052	0.0384036	0.0610328
BARD1	703.751	1.27849	0.199533	6.40743	1.47995e-10	6.19173e-10
BAX	663.156	1.28263	0.164978	7.77452	7.5735e-15	4.51956e-14
BAZ1A	1907.83	0.793198	0.159029	4.98776	6.10828e-07	1.80717e-06
BAZ1B	1814.14	1.41866	0.127618	11.1165	1.04325e-28	1.50294e-27
BAZ2A	2232.46	-2.32692	0.1447	-16.081	3.46707e-58	1.83871e-56
BAZ2B	2151.62	-1.38901	0.156421	-8.87998	6.68737e-19	5.34731e-18
BBS2	372.053	-0.32696	0.172132	-1.89947	0.0575026	0.0881532
BBX	805.363	0.018979	0.257122	0.0738132	0.941159	0.967757
BCAP29	313.429	0.93222	0.222564	4.18856	2.80734e-05	6.97356e-05
BCAP31	762.763	1.67004	0.171684	9.72743	2.3035e-22	2.3035e-21
BCAS3	592.639	-1.78539	0.185931	-9.6024	7.81044e-22	7.57543e-21
BCAT1	642.785	0.964172	0.116292	8.29094	1.1236e-16	7.71373e-16
BCCIP	316.541	1.85561	0.154741	11.9917	3.92781e-33	7.12044e-32
BCKDHA	430.18	1.34058	0.119734	11.1963	4.25152e-29	6.2249e-28
BCKDK	345.019	0.831491	0.228837	3.63354	0.000279555	0.000617012
BCL11A	770.895	0.0381937	0.194176	0.196696	0.844066	0.890057
BCL2	1240.57	1.31715	0.220045	5.98582	2.15302e-09	8.1275e-09
BCL2L1	691.707	0.722186	0.19495	3.70447	0.000211836	0.000474297
BCL2L13	623.773	0.914012	0.121368	7.53089	5.03955e-14	2.81827e-13
BCL6	501.983	-1.19546	0.216296	-5.52696	3.25823e-08	1.10156e-07
BCL7A	441.282	-0.718454	0.133424	-5.38474	7.25504e-08	2.36336e-07
BCL7B	340.349	-0.104809	0.114651	-0.914154	0.360636	0.444732
BCL7C	333.682	1.71617	0.16838	10.1922	2.14778e-24	2.43321e-23
BCLAF1	2436	-0.0191624	0.213368	-0.0898094	0.928439	0.957493
BCOR	884.618	-0.266656	0.161348	-1.65267	0.0983982	0.14349
BCR	4860.37	0.382161	0.133777	2.8567	0.0042807	0.00802753
BCS1L	313.983	1.99322	0.154575	12.8949	4.81031e-38	1.10879e-36
BDH1	550.849	0.749964	0.127882	5.86448	4.50541e-09	1.65356e-08
BDP1	1829.19	-0.739559	0.10192	-7.25626	3.97929e-13	2.07672e-12
BECN1	540.67	-0.10268	0.0970715	-1.05778	0.290157	0.369525
BET1L	534.324	-0.675967	0.179761	-3.76037	0.000169664	0.000383916
BEX4	357.856	1.69363	0.167426	10.1157	4.70647e-24	5.20893e-23
BFAR	344.538	1.05945	0.128806	8.22516	1.94933e-16	1.31249e-15
BHLHE40	736.922	-0.951555	0.200637	-4.74266	2.10934e-06	5.92049e-06
BICD2	1388.2	1.02878	0.103651	9.92539	3.22847e-23	3.38776e-22
BID	684.893	0.488423	0.118521	4.12099	3.77254e-05	9.22237e-05
BIN1	451.883	0.469204	0.207589	2.26026	0.0238053	0.0394271
BIN2	1409.24	0.356955	0.145556	2.45236	0.0141924	0.0245361
BIN3	509.198	-0.263941	0.20813	-1.26816	0.204742	0.274275
BIRC2	421.055	0.376505	0.235492	1.5988	0.109864	0.158319
BIRC5	436.222	1.5212	0.184106	8.26259	1.42539e-16	9.6985e-16
BIRC6	3929.65	-0.630662	0.23762	-2.65407	0.00795267	0.0143262
BIVM-ERCC5	642.97	0.499369	0.330958	1.50886	0.131335	0.185757
BLM	488.161	1.76016	0.190114	9.25843	2.07464e-20	1.82905e-19
BLMH	354.982	0.602097	0.205056	2.93626	0.00332195	0.00632212
BLOC1S1	361.43	1.7444	0.198998	8.76595	1.85208e-18	1.44129e-17
BLOC1S6	2921.25	-1.10502	0.139667	-7.91184	2.53617e-15	1.57121e-14
BLVRB	903.746	1.56963	0.143534	10.9356	7.79052e-28	1.07217e-26
BLZF1	327.481	0.459474	0.165969	2.76843	0.00563269	0.0103836
BMF	720.667	-0.852889	0.133741	-6.37717	1.80392e-10	7.49996e-10
BMI1	764.261	1.01466	0.156716	6.4745	9.51261e-11	4.05214e-10
BMP1	446.856	-0.513436	0.204561	-2.50994	0.0120752	0.0211201
BMP2K	1029.07	-0.785963	0.189333	-4.15122	3.30703e-05	8.14809e-05
BMPR1A	441.373	-2.55288	0.197103	-12.952	2.28811e-38	5.35796e-37
BMPR2	340.341	-2.54465	0.454166	-5.60291	2.10781e-08	7.26309e-08
BMS1	1144.48	1.13536	0.12273	9.25083	2.2276e-20	1.96139e-19
BMS1P2	307.056	-1.35403	0.146464	-9.2448	2.35686e-20	2.0699e-19
BMS1P5	400.801	-1.54157	0.182298	-8.45634	2.75898e-17	1.98527e-16
BNIP2	1503.78	0.435028	0.154043	2.82407	0.00474184	0.00882889
BNIP3L	1737.74	0.170345	0.10561	1.61297	0.10675	0.154393
BOD1L1	2233.49	-0.604468	0.109469	-5.52184	3.35465e-08	1.13212e-07
BOP1	656.593	1.94279	0.197471	9.83833	7.69811e-23	7.9129e-22
BPGM	420.721	2.57487	0.202564	12.7114	5.11077e-37	1.12046e-35
BPTF	2702.27	-0.414176	0.152147	-2.72222	0.00648459	0.011846
BRAF	719.21	-0.185383	0.127171	-1.45774	0.144913	0.202687
BRAP	328.249	0.37393	0.198414	1.88459	0.0594848	0.090868
BRAT1	916.669	0.918211	0.274679	3.34285	0.000829223	0.00172101
BRCA1	1574.56	0.75065	0.344484	2.17905	0.0293277	0.0477409
BRCA2	738.449	1.01118	0.280905	3.59972	0.00031856	0.000698617
BRD1	1552.62	-1.23835	0.162187	-7.63535	2.25213e-14	1.29744e-13
BRD2	4719.07	-0.656879	0.168821	-3.89099	9.98367e-05	0.000232176
BRD3	739.156	-0.0536614	0.243634	-0.220254	0.825673	0.875811
BRD4	1784.58	-1.88152	0.147436	-12.7616	2.6858e-37	5.96427e-36
BRD7	953.924	0.90499	0.137466	6.58335	4.59962e-11	2.0198e-10
BRD8	680.416	-0.3896	0.13585	-2.86786	0.00413257	0.00776142
BRD9	1031.34	-0.405876	0.181354	-2.23804	0.0252186	0.0415974
BRE	307.47	0.586264	0.175369	3.34302	0.000828715	0.00172013
BRF1	2420.11	-0.927425	0.204794	-4.52858	5.93803e-06	1.59113e-05
BRI3	313.856	-0.113627	0.164298	-0.691595	0.489192	0.575766
BRI3BP	997.578	1.95555	0.127425	15.3466	3.73128e-53	1.62741e-51
BRIP1	552.625	-0.0966179	0.11459	-0.843163	0.399137	0.485107
BRK1	404.571	1.50585	0.11884	12.6712	8.53658e-37	1.85184e-35
BRMS1	444.037	0.968511	0.125687	7.70572	1.30111e-14	7.65163e-14
BROX	506.308	0.514821	0.161699	3.18381	0.0014535	0.00291973
BRPF1	1043.12	-0.0425037	0.265837	-0.159886	0.872971	0.913625
BRPF3	378.705	-0.83008	0.208236	-3.98625	6.71257e-05	0.000159228
BRWD1	1899.9	-0.552886	0.125221	-4.41528	1.00877e-05	2.63163e-05
BRWD3	770.605	-0.967462	0.155505	-6.22141	4.92713e-10	1.96495e-09
BSDC1	1364.38	0.252664	0.101873	2.48019	0.0131312	0.0228439
BSG	2580.22	1.75812	0.179461	9.79664	1.16396e-22	1.1858e-21
BST1	393.353	0.51766	0.17764	2.9141	0.00356717	0.00675455
BST2	370.734	1.29997	0.110208	11.7956	4.11162e-32	7.01594e-31
BTAF1	2205.59	0.0458557	0.12446	0.368437	0.712548	0.781351
BTBD1	589.306	-0.00355	0.19161	-0.0185272	0.985218	1
BTBD11	653.502	-2.1926	0.248336	-8.82918	1.05443e-18	8.34402e-18
BTBD2	465.483	0.571742	0.198495	2.88039	0.00397188	0.00747831
BTBD3	482.885	0.325407	0.252964	1.28638	0.198311	0.266856
BTBD7	575.457	-0.793903	0.191934	-4.13633	3.52907e-05	8.66105e-05
BTBD9	420.119	-0.929431	0.185583	-5.00817	5.495e-07	1.63346e-06
BTF3	2327.82	1.87037	0.125638	14.887	4.00059e-50	1.53978e-48
BTF3L4	402.95	1.28196	0.143152	8.95526	3.38942e-19	2.75833e-18
BTG1	1092.32	-0.507449	0.141989	-3.57386	0.000351757	0.000766045
BTG2	1170.05	-0.00758705	0.132868	-0.0571024	0.954464	0.977152
BTK	908.694	0.36337	0.135004	2.69156	0.00711192	0.012912
BTN2A1	556.918	-0.663556	0.194477	-3.41201	0.000644859	0.00135694
BTN3A1	579.217	-0.205886	0.117108	-1.75808	0.0787337	0.117183
BTN3A2	1025.45	0.270639	0.339478	0.797222	0.425322	0.512194
BTRC	307.737	0.102688	0.165254	0.621394	0.53434	0.619086
BUB1	630.502	1.18626	0.243555	4.87061	1.11252e-06	3.20951e-06
BUB1B	634.917	2.37509	0.206693	11.4909	1.46595e-30	2.29807e-29
BUB3	791.802	1.84391	0.117729	15.6622	2.74064e-55	1.30275e-53
BUD31	406.426	0.0713899	0.160088	0.445942	0.655639	0.731521
BX927168.3	360.242	-4.51398	1.21369	-3.71921	0.000199847	0.000448965
BZRAP1	2528.84	1.21993	0.135819	8.98204	2.65782e-19	2.18102e-18
BZW1	1251.98	0.960707	0.229675	4.1829	2.8782e-05	7.13754e-05
BZW2	536.193	2.29119	0.116736	19.6271	9.07913e-86	1.06422e-83
C10orf11	550.474	-1.50524	0.168347	-8.94131	3.84595e-19	3.12001e-18
C10orf118	423.483	-0.608539	0.170127	-3.57698	0.000347591	0.000757772
C10orf12	447.797	-0.05487	0.151463	-0.362266	0.717153	0.785499
C10orf54	2006.35	-0.333394	0.200149	-1.66573	0.0957678	0.14006
C10orf76	759.741	-0.715481	0.149956	-4.77127	1.83066e-06	5.16712e-06
C11orf21	1040.47	-0.234863	0.107721	-2.18029	0.0292357	0.0476032
C11orf30	507.648	-0.0711375	0.176853	-0.40224	0.687507	0.759318
C11orf31	573.405	2.11609	0.109703	19.2893	6.60495e-83	7.36541e-81
C11orf48	456.914	1.76929	0.137897	12.8305	1.10647e-37	2.49197e-36
C11orf57	375.648	0.80635	0.214236	3.76384	0.000167321	0.000378823
C11orf58	1744.19	0.755961	0.178575	4.23328	2.30305e-05	5.77722e-05
C12orf43	352.023	-0.399512	0.172944	-2.31007	0.0208844	0.0349854
C12orf50	453.694	-2.22545	0.183858	-12.1042	1.0037e-33	1.89445e-32
C12orf55	616.974	-1.85997	0.221575	-8.39432	4.68597e-17	3.30276e-16
C12orf57	375.244	1.9444	0.159578	12.1846	3.75385e-34	7.1972e-33
C12orf65	394.624	-0.436568	0.161768	-2.69872	0.00696065	0.0126596
C12orf76	327.128	-1.12764	0.254906	-4.42375	9.70036e-06	2.53507e-05
C12orf77	413008	-0.126023	0.30555	-0.412447	0.680012	0.753014
C14orf159	1490.14	0.240041	0.121785	1.97102	0.0487216	0.0757556
C14orf166	559.425	1.73019	0.236363	7.32006	2.47865e-13	1.31316e-12
C14orf2	557.8	1.87355	0.157108	11.9252	8.74515e-33	1.55662e-31
C14orf23	839.602	-2.39384	0.285296	-8.3907	4.83246e-17	3.40135e-16
C14orf80	750.906	-1.75327	0.325612	-5.38452	7.26395e-08	2.36589e-07
C15orf39	888.809	-2.94162	0.344976	-8.52701	1.50178e-17	1.09942e-16
C15orf52	412.875	-1.83136	0.288668	-6.34415	2.2365e-10	9.22596e-10
C15orf57	368.11	-0.287245	0.189629	-1.51477	0.12983	0.183855
C16orf13	340.579	2.74941	0.271339	10.1328	3.95344e-24	4.3991e-23
C16orf54	1533.14	0.780234	0.0946848	8.24033	1.71733e-16	1.16274e-15
C16orf58	1172.53	0.854996	0.197863	4.32114	1.55225e-05	3.96226e-05
C16orf62	837.427	-0.602318	0.0833127	-7.2296	4.84414e-13	2.50966e-12
C16orf70	353.895	-1.40672	0.193045	-7.28702	3.16882e-13	1.66682e-12
C16orf72	1148.85	-0.531233	0.225319	-2.3577	0.0183887	0.031118
C16orf93	309.26	1.3914	0.186401	7.46454	8.35931e-14	4.58772e-13
C17orf49	311.938	1.35987	0.173917	7.81911	5.31981e-15	3.21369e-14
C17orf62	1556.81	0.415553	0.113733	3.65378	0.000258412	0.000572861
C17orf70	851.678	0.69959	0.247872	2.82239	0.00476675	0.00887208
C17orf85	979.814	0.907652	0.165198	5.49435	3.92162e-08	1.31166e-07
C18orf25	1280.73	0.0693274	0.125478	0.552505	0.580602	0.662931
C19orf10	421.044	2.17207	0.134444	16.156	1.03101e-58	5.61208e-57
C19orf25	429.47	-1.17134	0.281062	-4.16755	3.07894e-05	7.61521e-05
C19orf38	300.612	0.346985	0.25643	1.35314	0.176011	0.240582
C19orf43	1392.9	1.74902	0.151694	11.5299	9.31981e-31	1.48126e-29
C19orf48	733.355	1.94023	0.12313	15.7576	6.08816e-56	2.96924e-54
C19orf55	327.49	-1.7653	0.154306	-11.4403	2.63108e-30	4.08422e-29
C19orf60	721.844	1.12932	0.238452	4.73604	2.17934e-06	6.10453e-06
C19orf66	404.082	-1.00539	0.211211	-4.76014	1.93456e-06	5.44996e-06
C19orf77	307.484	6.16659	0.206828	29.8151	2.49224e-195	2.85638e-192
C1GALT1	341.77	-0.008175	0.16727	-0.048873	0.961021	0.981782
C1orf162	305.916	0.890425	0.175996	5.05934	4.20705e-07	1.26906e-06
C1orf174	401.852	0.888707	0.10483	8.47762	2.2984e-17	1.6643e-16
C1orf186	885.785	2.05392	0.129605	15.8475	1.46356e-56	7.27546e-55
C1orf216	324.872	-0.716671	0.226487	-3.16428	0.00155465	0.0031099
C1orf228	1258.28	2.0857	0.177605	11.7435	7.63002e-32	1.28917e-30
C1orf43	612.251	0.659077	0.0813764	8.09912	5.53588e-16	3.59475e-15
C1orf63	3029.37	-0.310038	0.112032	-2.7674	0.00565052	0.0104155
C1orf86	409.308	0.244382	0.399066	0.612385	0.540283	0.624848
C1QBP	984.139	3.05031	0.113673	26.8341	1.29336e-158	7.62346e-156
C1RL	423.778	0.357099	0.130602	2.73425	0.00625221	0.011456
C20orf112	1275.1	-0.69572	0.207909	-3.34627	0.000819072	0.00170183
C20orf194	379.125	-1.42726	0.134979	-10.5739	3.93582e-26	4.94796e-25
C20orf24	613.428	1.34577	0.219878	6.12054	9.32608e-10	3.63425e-09
C20orf27	695.548	2.32449	0.234753	9.90186	4.08595e-23	4.27017e-22
C21orf2	440.989	0.998803	0.320794	3.11353	0.00184861	0.00365191
C21orf33	919.205	1.26321	0.0635037	19.8919	4.78424e-88	5.84017e-86
C21orf58	762.322	0.74727	0.170726	4.37702	1.2031e-05	3.11106e-05
C21orf91	305.191	0.681956	0.0955017	7.14077	9.28079e-13	4.69617e-12
C22orf29	452.959	1.98435	0.292566	6.78258	1.18048e-11	5.41908e-11
C22orf34	806.057	-0.929247	0.12785	-7.26824	3.64209e-13	1.90653e-12
C22orf39	413.86	0.741851	0.138522	5.35547	8.53332e-08	2.75885e-07
C2CD2	496.035	0.608081	0.233287	2.60657	0.00914532	0.0163289
C2CD2L	470.499	-0.0745128	0.148295	-0.502464	0.615341	0.695238
C2CD3	1830.9	-1.51739	0.094323	-16.0872	3.13761e-58	1.66827e-56
C2CD5	730.943	-0.62101	0.325439	-1.90822	0.0563623	0.0865788
C2orf68	707.4	0.642818	0.159598	4.02773	5.63178e-05	0.000134784
C3orf58	684.462	0.940359	0.301647	3.11742	0.00182442	0.00360654
C4orf21	812.47	-0.776111	0.185618	-4.18123	2.89935e-05	7.18742e-05
C4orf29	548.634	0.226043	0.147346	1.53409	0.125007	0.17783
C4orf3	406.526	1.6622	0.192838	8.61968	6.71418e-18	5.01678e-17
C4orf32	3008.48	-2.31239	0.332594	-6.95259	3.58652e-12	1.7243e-11
C4orf36	377.567	-1.56086	0.116192	-13.4335	3.84978e-41	1.03548e-39
C5	312.54	-0.970253	0.15587	-6.22477	4.82263e-10	1.92402e-09
C5AR1	329.242	-1.79442	0.249713	-7.18592	6.67565e-13	3.42158e-12
C5orf24	333.542	-0.0569415	0.108525	-0.524684	0.599803	0.680821
C5orf42	819.416	-0.643377	0.250836	-2.56493	0.0103197	0.0182586
C5orf45	1067.67	-1.45212	0.14292	-10.1604	2.97824e-24	3.34282e-23
C6orf106	769.314	0.128541	0.172388	0.745649	0.45588	0.54363
C6orf120	319.923	1.1571	0.20187	5.73194	9.92911e-09	3.52925e-08
C6orf48	859.417	1.31266	0.118686	11.0599	1.96368e-28	2.77934e-27
C6orf62	1863.66	0.753005	0.168357	4.47267	7.72497e-06	2.04185e-05
C6orf89	668.523	1.04881	0.116836	8.97677	2.78826e-19	2.28352e-18
C7orf26	305.214	0.868688	0.30087	2.88726	0.00388618	0.00732498
C7orf43	336.391	-0.0615096	0.192404	-0.31969	0.749204	0.813263
C7orf49	427.438	0.848554	0.165028	5.14187	2.72021e-07	8.35338e-07
C7orf50	339.72	0.138189	0.247121	0.559195	0.576029	0.658872
C7orf55-LUC7L2	1497.67	-0.336957	0.225597	-1.49362	0.135274	0.190635
C7orf73	533.069	0.999684	0.10764	9.28728	1.58279e-20	1.40564e-19
C9orf114	654.905	1.48727	0.229738	6.47378	9.55793e-11	4.06977e-10
C9orf142	367.541	1.15267	0.261069	4.41521	1.00914e-05	2.63226e-05
C9orf3	430.926	-1.31699	0.219899	-5.98906	2.11052e-09	7.97289e-09
C9orf69	346.972	1.56331	0.283697	5.51051	3.57792e-08	1.20235e-07
C9orf72	398.832	-1.77697	0.161342	-11.0137	3.28341e-28	4.58921e-27
C9orf78	788.657	0.00904526	0.209326	0.0432113	0.965533	0.985501
C9orf89	408.839	-0.400588	0.184797	-2.16772	0.0301796	0.0490164
C9orf91	355.143	-0.399142	0.187559	-2.12809	0.03333	0.0536808
CA1	3200.58	4.80909	0.213388	22.5368	1.80835e-112	4.14513e-110
CA2	668.619	4.60681	0.2002	23.0111	3.61298e-117	9.43491e-115
CA5B	606.607	-1.43371	0.113536	-12.6279	1.48261e-36	3.17285e-35
CAB39	1096.47	0.360617	0.0986112	3.65696	0.000255226	0.000566103
CABIN1	2363.88	-0.362447	0.173226	-2.09234	0.0364084	0.0582433
CACNA2D4	1259.39	0.972813	0.159579	6.09614	1.08661e-09	4.20972e-09
CACTIN	602.19	0.781468	0.221511	3.52791	0.000418862	0.000903127
CACUL1	1161.6	-0.897034	0.214089	-4.19	2.78955e-05	6.9327e-05
CACYBP	422.902	2.17772	0.213232	10.2129	1.7354e-24	1.97579e-23
CAD	1601.55	0.64342	0.159633	4.03061	5.56334e-05	0.000133223
CALCOCO1	1415.59	-0.148064	0.112215	-1.31947	0.187012	0.253653
CALCOCO2	2015.06	-0.490687	0.116663	-4.20604	2.59889e-05	6.48309e-05
CALM1	1581.92	0.794984	0.132909	5.98141	2.21216e-09	8.34009e-09
CALM2	2343.89	1.06922	0.186816	5.7234	1.0441e-08	3.6991e-08
CALM3	1583.84	1.65527	0.132403	12.5017	7.30694e-36	1.51652e-34
CALR	8812.98	2.27593	0.127815	17.8065	6.29772e-71	5.21775e-69
CALU	482.252	1.99023	0.152639	13.0388	7.36397e-39	1.76855e-37
CAMK1D	625.598	-1.88076	0.116861	-16.094	2.81056e-58	1.50212e-56
CAMK2G	724.435	0.185868	0.190589	0.975227	0.329448	0.411735
CAMKK2	992.65	-0.217914	0.168839	-1.29066	0.196823	0.265025
CAMLG	324.229	0.80775	0.168851	4.78381	1.72003e-06	4.8702e-06
CAMSAP1	697.149	-0.0830066	0.228279	-0.363619	0.716143	0.784559
CAMTA2	481.92	-2.48627	0.209017	-11.8951	1.25494e-32	2.21088e-31
CAND1	1302.86	1.50133	0.166632	9.00985	2.06341e-19	1.70888e-18
CANT1	404.658	0.736503	0.175395	4.1991	2.6798e-05	6.67765e-05
CANX	4867.05	1.33666	0.0698674	19.1314	1.38277e-81	1.5014e-79
CAP1	2473.15	1.11556	0.126901	8.7908	1.48494e-18	1.16171e-17
CAPG	953.827	1.2825	0.154222	8.31592	9.1042e-17	6.29633e-16
CAPN1	1679.78	0.574678	0.126596	4.53948	5.6394e-06	1.51407e-05
CAPN10	679.886	-0.687937	0.127663	-5.38869	7.09718e-08	2.31266e-07
CAPN15	1302.91	0.771493	0.239356	3.22321	0.00126765	0.00256539
CAPN2	1426.43	-0.868951	0.139227	-6.24127	4.34025e-10	1.73931e-09
CAPN7	405.809	-0.768635	0.187526	-4.09882	4.15254e-05	0.00010107
CAPNS1	995.404	0.96615	0.21345	4.52635	6.00119e-06	1.60722e-05
CAPRIN1	2584.18	0.814429	0.106819	7.62438	2.45208e-14	1.41038e-13
CAPRIN2	506.275	-1.41771	0.132403	-10.7075	9.38499e-27	1.21616e-25
CAPS	806.297	-1.20815	0.156781	-7.70597	1.29849e-14	7.6384e-14
CAPZA1	1327.95	0.486421	0.240949	2.01877	0.0435109	0.068406
CAPZA2	1442.06	0.231848	0.386741	0.599491	0.548846	0.633012
CAPZB	884.755	0.534668	0.158033	3.38326	0.0007163	0.00149917
CARD11	439.742	0.241412	0.155454	1.55295	0.120435	0.172038
CARD8	1496.21	0.388507	0.175098	2.2188	0.0265005	0.0435099
CARD9	1058.18	0.673433	0.253314	2.65849	0.00784915	0.0141471
CARHSP1	492.106	1.6283	0.126152	12.9075	4.08395e-38	9.45588e-37
CARS	674.416	-0.428734	0.156586	-2.73802	0.00618103	0.0113336
CARS2	1049.12	-0.276476	0.088522	-3.12324	0.0017887	0.00354169
CASC3	1109.53	-0.547771	0.174591	-3.13745	0.00170422	0.00338742
CASC4	1123.72	-0.623455	0.19789	-3.15051	0.00162983	0.0032499
CASC5	1102.09	1.90836	0.258435	7.38428	1.53275e-13	8.25174e-13
CASD1	389.155	0.870457	0.28484	3.05596	0.00224345	0.00438114
CASP1	367.986	0.283165	0.204085	1.38749	0.165293	0.227622
CASP10	566.202	-1.25945	0.224236	-5.61662	1.94724e-08	6.72216e-08
CASP2	2310.49	-0.194848	0.123145	-1.58226	0.11359	0.163141
CASP3	661.623	1.7126	0.164087	10.4371	1.67847e-25	2.04168e-24
CASP4	639.125	1.01959	0.160578	6.34947	2.16053e-10	8.92325e-10
CASP8	1294.13	-0.595016	0.107954	-5.51175	3.55288e-08	1.1953e-07
CASP9	304.259	-0.371174	0.125471	-2.95826	0.00309386	0.00592355
CAST	1016.15	-2.23605	0.161351	-13.8583	1.13319e-43	3.31599e-42
CAT	3718.89	1.96229	0.0887565	22.1087	2.60601e-108	5.54247e-106
CBFA2T2	769.499	-1.35576	0.126547	-10.7135	8.79677e-27	1.14209e-25
CBFA2T3	1032.05	-1.99032	0.268231	-7.42018	1.16957e-13	6.36631e-13
CBFB	531.668	0.24176	0.166754	1.4498	0.147115	0.205387
CBL	912.282	0.00392387	0.0891484	0.044015	0.964892	0.985042
CBLB	468.953	-1.4782	0.190971	-7.74047	9.90512e-15	5.86854e-14
CBWD1	560.786	0.425089	0.15707	2.70637	0.00680225	0.012389
CBWD2	675.836	-0.44899	0.123377	-3.63917	0.000273522	0.000604408
CBWD5	660.908	-0.173833	0.161559	-1.07597	0.28194	0.361157
CBWD6	1022.66	-0.142085	0.20006	-0.71021	0.477574	0.564572
CBX1	305.055	1.72925	0.140571	12.3016	8.87741e-35	1.7492e-33
CBX2	564.213	2.86835	0.203094	14.1232	2.7314e-45	8.62922e-44
CBX3	1189.06	1.78094	0.147695	12.0582	1.7555e-33	3.2686e-32
CBX4	427.738	0.148855	0.225117	0.661232	0.508463	0.594379
CBX5	2142.8	0.945303	0.185121	5.10641	3.28339e-07	1.00054e-06
CBX6	732.057	0.233927	0.14315	1.63414	0.10223	0.148543
CC2D1A	537.447	-0.693681	0.183706	-3.77605	0.000159337	0.00036162
CC2D1B	899.226	-1.21214	0.341625	-3.54816	0.00038793	0.000839768
CCAR1	1874.17	-0.197768	0.179307	-1.10296	0.270046	0.34819
CCAR2	1770.74	0.122251	0.0936145	1.3059	0.191587	0.259006
CCDC117	358.507	0.949265	0.178416	5.32052	1.03472e-07	3.31309e-07
CCDC12	579.764	0.373875	0.133967	2.7908	0.00525779	0.00973246
CCDC122	579.476	-2.82523	0.451983	-6.25076	4.08472e-10	1.64201e-09
CCDC125	734.752	-0.273027	0.208499	-1.30948	0.190371	0.257497
CCDC127	320.893	-2.35632	0.243543	-9.67519	3.8438e-22	3.79777e-21
CCDC130	613.599	-0.713713	0.105955	-6.736	1.62804e-11	7.38978e-11
CCDC132	337.324	-0.264589	0.25824	-1.02459	0.305559	0.386042
CCDC136	649.684	-1.37202	0.282502	-4.85669	1.19366e-06	3.43209e-06
CCDC137	355.453	0.706059	0.168519	4.18978	2.7922e-05	6.93847e-05
CCDC14	1283.8	1.02837	0.165944	6.19709	5.75181e-10	2.27579e-09
CCDC142	467.637	-0.376204	0.190165	-1.9783	0.0478946	0.0746047
CCDC144A	681.429	-1.2131	0.118772	-10.2137	1.72179e-24	1.96246e-23
CCDC144B	719.322	-1.03151	0.14381	-7.17272	7.35203e-13	3.75316e-12
CCDC150	312.76	-0.857958	0.274778	-3.12237	0.00179401	0.00355051
CCDC159	421.071	-0.341871	0.151104	-2.26249	0.0236671	0.0392076
CCDC162P	964.653	4.82345	0.604184	7.98341	1.42341e-15	8.9801e-15
CCDC171	446.1	0.248018	0.241478	1.02708	0.304381	0.384813
CCDC174	347.119	-0.504841	0.209384	-2.41108	0.0159055	0.0272353
CCDC18	477.074	0.885764	0.202723	4.36933	1.24629e-05	3.21509e-05
CCDC180	673.973	-0.728203	0.14645	-4.97238	6.61366e-07	1.94997e-06
CCDC22	404.017	0.916946	0.206172	4.44748	8.68819e-06	2.28125e-05
CCDC30	422.12	-1.91014	0.278952	-6.84755	7.51249e-12	3.50878e-11
CCDC41	448.858	-0.820445	0.243503	-3.36935	0.000753465	0.00157248
CCDC47	736.795	0.235186	0.125004	1.88142	0.0599142	0.0914494
CCDC50	393.727	0.241468	0.22991	1.05028	0.293591	0.373208
CCDC57	1274.19	-0.726929	0.197786	-3.67533	0.000237541	0.000528694
CCDC6	712.75	0.0247605	0.155371	0.159364	0.873382	0.913904
CCDC66	385.274	0.0218691	0.168354	0.129899	0.896646	0.932772
CCDC69	868.234	-1.89367	0.147879	-12.8056	1.52539e-37	3.42053e-36
CCDC71L	311.295	1.09382	0.285742	3.828	0.000129188	0.000296424
CCDC84	505.509	-1.76679	0.104591	-16.8924	5.12117e-64	3.28105e-62
CCDC88A	2779.79	-0.83094	0.143153	-5.80457	6.45323e-09	2.33767e-08
CCDC88B	2774.01	-0.384881	0.10642	-3.61663	0.000298468	0.00065665
CCDC88C	2286.41	-1.04344	0.225604	-4.62511	3.74408e-06	1.02197e-05
CCDC9	617.517	-1.75596	0.209187	-8.39422	4.68978e-17	3.30431e-16
CCDC90B	671.014	-0.239298	0.140848	-1.69898	0.0893231	0.131483
CCDC91	385.523	-0.294114	0.197246	-1.49111	0.135933	0.191446
CCDC93	785.413	-0.896898	0.232509	-3.85747	0.000114567	0.000264464
CCDC94	349.557	0.41015	0.104346	3.93068	8.47062e-05	0.000198308
CCDC97	325.149	-0.468358	0.225774	-2.07446	0.0380366	0.0605335
CCHCR1	557.188	1.15097	0.223429	5.15141	2.58531e-07	7.9557e-07
CCL5	724.734	-0.938394	0.203299	-4.61584	3.91514e-06	1.06711e-05
CCM2	697.063	0.379132	0.132976	2.85113	0.00435637	0.00815996
CCNA1	371.858	2.48531	0.0991594	25.0637	1.23651e-138	5.20598e-136
CCNA2	479.755	3.87362	0.198369	19.5274	6.42376e-85	7.36234e-83
CCNB1	382.262	3.66547	0.23062	15.894	6.97233e-57	3.54283e-55
CCNB1IP1	368.683	0.975726	0.143177	6.81482	9.43807e-12	4.36331e-11
CCNC	323.559	0.421706	0.202549	2.082	0.0373423	0.0595618
CCND2	2155.27	1.49399	0.107431	13.9065	5.78436e-44	1.73699e-42
CCND3	907.417	1.39649	0.111066	12.5735	2.95326e-36	6.22327e-35
CCNDBP1	908.652	0.444071	0.165084	2.68997	0.00714584	0.012969
CCNF	442.47	3.33359	0.126152	26.4251	7.05291e-154	4.04171e-151
CCNG1	669.758	1.78091	0.157429	11.3124	1.13872e-29	1.70725e-28
CCNG2	649.128	-0.827958	0.107355	-7.71235	1.23521e-14	7.27651e-14
CCNH	801.221	0.805205	0.0929244	8.66516	4.50872e-18	3.40465e-17
CCNI	1965.91	0.110209	0.242282	0.454881	0.649195	0.725826
CCNK	376.224	-1.26454	0.155089	-8.15364	3.53133e-16	2.33573e-15
CCNL1	2826.58	-0.570004	0.10547	-5.40443	6.50152e-08	2.1273e-07
CCNL2	2983.25	-0.870556	0.0884561	-9.84167	7.44624e-23	7.66929e-22
CCNT1	485.511	-0.0761	0.270684	-0.28114	0.778603	0.837258
CCNT2	589.919	-0.551363	0.289572	-1.90406	0.0569019	0.0873167
CCNY	751.911	0.0938863	0.151285	0.620592	0.534868	0.619523
CCP110	500.189	0.969485	0.119625	8.10438	5.30134e-16	3.45005e-15
CCPG1	1031.17	-0.931642	0.110526	-8.42919	3.48076e-17	2.48815e-16
CCR2	613.553	1.03184	0.151249	6.8221	8.97189e-12	4.15653e-11
CCRN4L	385.473	2.34333	0.198406	11.8108	3.43319e-32	5.89241e-31
CCS	536.802	0.537944	0.133959	4.01573	5.92618e-05	0.000141425
CCSAP	420.98	0.699862	0.173373	4.03674	5.41982e-05	0.000129952
CCSER2	377.584	-0.538887	0.237614	-2.26791	0.0233344	0.0387093
CCT2	1244.67	1.4924	0.136957	10.8969	1.19306e-27	1.62141e-26
CCT3	1186.09	1.83112	0.159086	11.5102	1.17202e-30	1.84852e-29
CCT4	1087.67	2.34574	0.10724	21.8738	4.61852e-106	9.43368e-104
CCT5	1514.12	2.02651	0.127209	15.9306	3.88888e-57	1.99571e-55
CCT6A	1125.31	1.71074	0.124998	13.6861	1.22938e-42	3.47903e-41
CCT7	1271.92	2.1704	0.10377	20.9155	3.86778e-97	6.18545e-95
CCT8	999.585	1.57451	0.16779	9.38383	6.36211e-21	5.8024e-20
CCZ1	609.713	1.01674	0.268154	3.79164	0.000149654	0.000340768
CCZ1B	355.52	-0.0921569	0.249916	-0.368752	0.712313	0.781151
CD14	607.301	-1.8172	0.276475	-6.57276	4.93898e-11	2.16008e-10
CD151	444.94	-0.776915	0.166536	-4.66515	3.08399e-06	8.49323e-06
CD163	344.229	-0.396365	0.257384	-1.53998	0.123565	0.17601
CD164	2291.21	1.05722	0.123758	8.54262	1.31211e-17	9.65365e-17
CD244	500.849	0.592443	0.111965	5.2913	1.21449e-07	3.86413e-07
CD2AP	794.72	0.364898	0.16625	2.19488	0.0281726	0.0460065
CD2BP2	696.521	1.2189	0.144407	8.44074	3.15327e-17	2.25796e-16
CD300A	361.7	-0.0392721	0.144919	-0.270993	0.786396	0.843235
CD300E	388.467	-3.84215	0.134453	-28.5762	1.32648e-179	1.18979e-176
CD302	502.177	0.576173	0.206406	2.79146	0.00524714	0.00971448
CD33	620.999	0.96236	0.0902101	10.668	1.43702e-26	1.84363e-25
CD34	467.183	3.11498	0.159437	19.5374	5.27737e-85	6.08225e-83
CD36	1876.56	-0.493532	0.255038	-1.93513	0.0529743	0.0818009
CD37	678.424	-0.741451	0.129854	-5.70987	1.13064e-08	3.99745e-08
CD38	980.687	1.87722	0.16206	11.5835	4.99482e-31	8.09451e-30
CD4	345.113	-1.33536	0.121205	-11.0174	3.15028e-28	4.40911e-27
CD44	2889.57	-1.37147	0.18275	-7.50462	6.16087e-14	3.41755e-13
CD46	1568.44	0.125455	0.225755	0.555713	0.578407	0.660875
CD47	2134.86	1.07779	0.508	2.12164	0.0338684	0.0544587
CD48	328.674	0.403546	0.224056	1.80109	0.0716884	0.107559
CD52	1039.41	0.301957	0.159218	1.8965	0.0578939	0.0886806
CD53	1274.26	0.692054	0.158052	4.37865	1.19418e-05	3.08992e-05
CD55	1143.88	-0.875457	0.117481	-7.45192	9.19945e-14	5.03407e-13
CD59	457.769	1.07203	0.172913	6.19983	5.65235e-10	2.23858e-09
CD6	281163	0.154717	0.310266	0.498659	0.61802	0.697813
CD63	880.698	1.18426	0.134149	8.82795	1.06609e-18	8.43303e-18
CD68	1108.33	-0.433404	0.171206	-2.53147	0.0113584	0.0199493
CD69	956.303	3.21805	0.130722	24.6175	8.20759e-134	3.02362e-131
CD74	8876.73	0.0713598	0.154162	0.462887	0.643445	0.720488
CD81	627.198	1.0523	0.199728	5.26869	1.37399e-07	4.34478e-07
CD82	1352.52	0.169691	0.145952	1.16265	0.244972	0.320406
CD83	610.362	-2.77481	0.117776	-23.56	9.91483e-123	3.00798e-120
CD84	1160.1	-0.359199	0.165972	-2.16422	0.0304474	0.0494241
CD93	2285.16	0.831586	0.0986879	8.42642	3.5639e-17	2.54406e-16
CD96	744.22	2.91829	0.221341	13.1846	1.07582e-39	2.70001e-38
CD97	3671.06	-1.84415	0.140915	-13.0869	3.91091e-39	9.53688e-38
CD99	1987.58	0.168267	0.137744	1.22159	0.221862	0.293832
CD99L2	340.437	1.14	0.103923	10.9697	5.34405e-28	7.41411e-27
CDAN1	784.278	0.900121	0.141171	6.37609	1.8167e-10	7.55008e-10
CDC123	586.86	1.84151	0.175754	10.4778	1.09273e-25	1.34265e-24
CDC14A	589.621	-0.356238	0.13774	-2.58632	0.00970075	0.0172359
CDC16	603.549	-0.368224	0.226641	-1.6247	0.104226	0.151144
CDC20	307.988	4.001	0.224029	17.8593	2.44638e-71	2.03503e-69
CDC25A	336.784	2.94611	0.390649	7.54158	4.6431e-14	2.61071e-13
CDC25B	467.219	0.615795	0.154846	3.97682	6.98437e-05	0.000165238
CDC27	881.94	0.69775	0.14781	4.72057	2.35181e-06	6.56446e-06
CDC34	352.487	0.316708	0.276362	1.14599	0.251799	0.328026
CDC37	1947.63	0.984408	0.103239	9.53526	1.49504e-21	1.42724e-20
CDC40	445.548	0.150723	0.0968878	1.55564	0.119793	0.171204
CDC42	2160.8	0.910686	0.135839	6.70414	2.02594e-11	9.10969e-11
CDC42BPB	436.31	-1.62027	0.424413	-3.81767	0.000134719	0.000308635
CDC42EP3	546.306	-0.98044	0.122153	-8.02633	1.00435e-15	6.4088e-15
CDC42SE1	1388.42	-0.121863	0.125814	-0.968597	0.332746	0.415379
CDC42SE2	871.026	0.632377	0.154075	4.10436	4.05441e-05	9.87866e-05
CDC45	607.555	2.01726	0.185148	10.8954	1.21288e-27	1.64725e-26
CDC5L	812.264	1.09659	0.148473	7.38579	1.51548e-13	8.16515e-13
CDC6	486.064	2.81035	0.201701	13.9333	3.97652e-44	1.20287e-42
CDC73	753.833	-1.09589	0.148235	-7.39293	1.4363e-13	7.75879e-13
CDCA4	329.88	2.15621	0.193169	11.1623	6.23883e-29	9.07665e-28
CDCA5	319.063	2.67355	0.216954	12.3231	6.80005e-35	1.34889e-33
CDCA7	691.915	3.40086	0.115175	29.5279	1.26302e-191	1.24076e-188
CDCA7L	1308.52	2.2711	0.113427	20.0227	3.49485e-89	4.47818e-87
CDH24	441.599	0.604307	0.299541	2.01744	0.0436492	0.0685822
CDIPT	378.941	1.34952	0.211231	6.38882	1.67174e-10	6.96445e-10
CDK1	376.813	3.60837	0.303105	11.9047	1.119e-32	1.97815e-31
CDK10	1233.93	-0.0591226	0.122277	-0.483515	0.62873	0.707351
CDK11A	1035.33	-1.13637	0.0865299	-13.1327	2.1388e-39	5.31607e-38
CDK11B	664.875	0.386443	0.256794	1.50488	0.132356	0.187033
CDK12	1932.62	-0.320711	0.100901	-3.17846	0.00148061	0.0029687
CDK13	1650.52	0.432592	0.167587	2.58129	0.00984314	0.0174739
CDK14	337.629	0.574509	0.215523	2.66565	0.00768393	0.0138724
CDK16	737.215	-0.10859	0.218173	-0.497727	0.618677	0.698512
CDK17	1160.22	-1.26666	0.204943	-6.18056	6.38764e-10	2.52012e-09
CDK19	573.175	-0.039147	0.242766	-0.161254	0.871893	0.912637
CDK2	452.34	2.42584	0.237974	10.1937	2.11492e-24	2.39729e-23
CDK2AP1	422.431	1.99968	0.393069	5.08736	3.6308e-07	1.10217e-06
CDK4	821.52	2.84578	0.1344	21.174	1.6601e-99	2.85399e-97
CDK5RAP1	492.719	0.718961	0.118183	6.08346	1.17613e-09	4.54716e-09
CDK5RAP2	3212.83	0.13821	0.158472	0.872147	0.383128	0.468543
CDK5RAP3	5827.94	0.0924025	0.109241	0.845856	0.397633	0.483421
CDK6	6815.49	1.56694	0.188693	8.30418	1.00514e-16	6.93282e-16
CDK9	1188.87	-0.0861357	0.1561	-0.551799	0.581086	0.663335
CDKAL1	553.233	0.489632	0.112496	4.35242	1.34642e-05	3.45824e-05
CDKN1A	705.45	-0.995296	0.171811	-5.79297	6.9152e-09	2.49668e-08
CDKN1B	835.285	0.849485	0.240517	3.53192	0.00041256	0.000890399
CDS2	1023.54	0.110209	0.0998708	1.10352	0.269802	0.347898
CDT1	998.705	2.28139	0.25519	8.93997	3.89278e-19	3.15552e-18
CDV3	1916.09	0.90989	0.172057	5.28829	1.23465e-07	3.9228e-07
CDYL	600.265	0.762489	0.100841	7.5613	3.99052e-14	2.26042e-13
CDYL2	375.453	0.554224	0.173112	3.20154	0.00136696	0.00275502
CEBPA	1182.6	0.827328	0.606479	1.36415	0.172521	0.236297
CEBPB	677.507	-0.52927	0.341345	-1.55054	0.121011	0.172778
CEBPD	1665.84	1.22887	0.213516	5.75543	8.64237e-09	3.09159e-08
CEBPG	393.123	0.352402	0.105131	3.35202	0.000802255	0.0016689
CEBPZ	569.879	1.39661	0.281487	4.96154	6.99353e-07	2.05464e-06
CEBPZ-AS1	478.924	-0.569762	0.227427	-2.50526	0.0122363	0.0213891
CECR1	945.577	-1.55096	0.192938	-8.03862	9.08585e-16	5.81393e-15
CECR5	493.818	1.772	0.139905	12.6658	9.15003e-37	1.97867e-35
CELF1	1822.22	-1.56725	0.172677	-9.0762	1.12427e-19	9.46678e-19
CELF2	2073.67	0.303298	0.102535	2.95799	0.00309653	0.00592812
CENPB	816.001	2.1642	0.210691	10.2719	9.42982e-25	1.09475e-23
CENPC	770.32	-0.179905	0.183433	-0.980764	0.326709	0.408733
CENPE	586.658	1.82948	0.313535	5.83502	5.37833e-09	1.96103e-08
CENPF	2173.17	1.40235	0.174663	8.02889	9.83567e-16	6.28204e-15
CENPJ	485.768	1.58352	0.223388	7.08864	1.35436e-12	6.74076e-12
CENPK	327.2	0.359713	0.194641	1.84809	0.0645899	0.0979195
CENPO	369.658	1.42969	0.175481	8.14724	3.72317e-16	2.4571e-15
CENPP	445.054	1.01833	0.140132	7.26698	3.67615e-13	1.92387e-12
CENPT	1033.71	0.710253	0.167993	4.22788	2.359e-05	5.90896e-05
CENPU	465.465	1.78967	0.136675	13.0943	3.54867e-39	8.68435e-38
CEP104	640.695	0.0681866	0.208035	0.327765	0.74309	0.807887
CEP120	407.069	0.538249	0.177	3.04096	0.00235827	0.00458886
CEP128	815.566	0.406178	0.162594	2.49811	0.0124857	0.0217864
CEP135	1350.48	-1.02435	0.183316	-5.58792	2.29801e-08	7.88163e-08
CEP152	614.44	-0.155028	0.15258	-1.01605	0.309607	0.390319
CEP164	634.255	-0.408744	0.139411	-2.93193	0.0033686	0.0064044
CEP170	1748.88	-0.551076	0.102394	-5.38193	7.36894e-08	2.39857e-07
CEP192	1661.57	0.458789	0.146283	3.13632	0.00171081	0.00339857
CEP250	1592.16	0.530138	0.210666	2.51649	0.011853	0.0207526
CEP290	699.194	0.303092	0.190273	1.59293	0.111176	0.160031
CEP350	2188.56	-0.0233531	0.13856	-0.168541	0.866157	0.908015
CEP41	300.972	0.963193	0.176863	5.44598	5.15223e-08	1.70146e-07
CEP57	973.112	1.05721	0.0893827	11.8279	2.80214e-32	4.82943e-31
CEP63	388.967	0.199393	0.206724	0.964538	0.334777	0.417459
CEP68	595.159	0.283369	0.116031	2.44219	0.0145985	0.0251855
CEP72	384.791	1.02626	0.198225	5.17722	2.25215e-07	6.96894e-07
CEP78	736.706	1.64503	0.245154	6.71018	1.94385e-11	8.75583e-11
CEP85	1104.29	0.880953	0.129771	6.78851	1.13297e-11	5.20443e-11
CEP85L	317.346	-1.28669	0.177508	-7.24866	4.20916e-13	2.19114e-12
CEP95	798.182	-1.18214	0.179373	-6.59039	4.38667e-11	1.92793e-10
CEP97	475.473	0.221634	0.206626	1.07263	0.283436	0.362735
CEPT1	370.486	0.764243	0.177986	4.29383	1.75616e-05	4.46561e-05
CERCAM	478.998	-2.1784	0.226101	-9.63467	5.70764e-22	5.5805e-21
CERK	1113.73	0.698404	0.124344	5.6167	1.94636e-08	6.72023e-08
CERS2	1018.74	1.14768	0.276856	4.14541	3.39211e-05	8.34377e-05
CERS5	658.498	-1.8126	0.237884	-7.61969	2.54286e-14	1.46045e-13
CERS6	1399.49	1.29768	0.0767276	16.9128	3.61807e-64	2.3546e-62
CES1	394.695	0.595293	0.836721	0.711459	0.4768	0.563754
CES2	566.724	0.366874	0.164534	2.22977	0.0257626	0.0424102
CFD	2075.01	1.39421	0.318779	4.37361	1.22211e-05	3.15582e-05
CFDP1	403.713	0.310374	0.145997	2.1259	0.033512	0.0539276
CFL1	3948.22	1.36446	0.113855	11.9842	4.29987e-33	7.76762e-32
CFLAR	4379.75	-0.659741	0.0668607	-9.8674	5.76397e-23	5.96641e-22
CFP	1809.04	-0.0395502	0.1724	-0.22941	0.81855	0.870089
CGGBP1	800.584	0.758348	0.288651	2.62722	0.0086086	0.0154283
CHAF1A	1615.07	1.43059	0.25121	5.69479	1.23524e-08	4.35385e-08
CHAF1B	684.482	-0.429653	0.122948	-3.49459	0.000474789	0.00101596
CHCHD2	1264.67	2.35975	0.19014	12.4106	2.28937e-35	4.63945e-34
CHCHD3	663.272	1.44077	0.143104	10.068	7.65474e-24	8.36869e-23
CHD1	1838.28	-0.736997	0.276769	-2.66286	0.0077479	0.0139793
CHD1L	1356.92	1.01178	0.201143	5.03015	4.90096e-07	1.46766e-06
CHD2	4653.75	-1.42913	0.102972	-13.8788	8.51192e-44	2.52663e-42
CHD3	4817.11	0.0773359	0.130683	0.591784	0.553995	0.638003
CHD4	6842.12	-0.211066	0.158201	-1.33416	0.182151	0.247907
CHD6	2234.06	-0.120948	0.174321	-0.693827	0.487791	0.574622
CHD7	412.125	-1.19338	0.455155	-2.62192	0.00874347	0.0156496
CHD8	1612.73	-0.181988	0.140622	-1.29417	0.195608	0.263648
CHD9	1928.86	0.0297911	0.178531	0.166868	0.867474	0.908933
CHEK1	525.592	0.86262	0.142568	6.05058	1.44322e-09	5.53002e-09
CHEK2	415.158	0.388943	0.168513	2.30809	0.0209941	0.0351549
CHERP	470.93	-0.357209	0.189626	-1.88375	0.0595982	0.0910142
CHFR	1576.52	-1.19531	0.0988101	-12.0971	1.09475e-33	2.06252e-32
CHID1	618.443	1.55854	0.16382	9.51371	1.83987e-21	1.74834e-20
CHKA	589.191	0.148224	0.113884	1.30154	0.193075	0.260694
CHKB	837.827	-0.290448	0.13588	-2.13753	0.0325548	0.0525513
CHML	325.735	1.21898	0.129131	9.4398	3.73475e-21	3.46594e-20
CHMP1A	743.625	0.307182	0.166545	1.84443	0.06512	0.0986217
CHMP1B	1406.09	-0.353658	0.123902	-2.85433	0.00431274	0.00808248
CHMP2A	326.496	1.20374	0.136662	8.80822	1.27151e-18	1.00119e-17
CHMP3	532.689	0.278806	0.115462	2.4147	0.0157482	0.0269883
CHMP4A	403.199	0.195864	0.168095	1.1652	0.243938	0.319176
CHMP4B	487.933	0.495698	0.232398	2.13297	0.0329274	0.0531029
CHMP6	503.224	0.789592	0.15804	4.99616	5.84818e-07	1.7332e-06
CHMP7	503.709	-0.158107	0.121993	-1.29603	0.194965	0.262919
CHORDC1	545.951	-0.264385	0.197475	-1.33883	0.180626	0.246173
CHP1	1121.91	-0.324254	0.133089	-2.43637	0.0148354	0.0255514
CHPF2	1193.25	0.879965	0.156984	5.60545	2.07712e-08	7.15973e-08
CHPT1	453.851	0.855288	0.196752	4.34704	1.37988e-05	3.53977e-05
CHRNA7	303.321	-0.59932	0.11544	-5.19159	2.08507e-07	6.47914e-07
CHST11	2457.02	-0.263648	0.250985	-1.05045	0.29351	0.373127
CHST12	629.692	0.960892	0.280137	3.43008	0.000603397	0.0012749
CHST2	608.874	0.510566	0.239783	2.12928	0.033231	0.0535423
CHSY1	949.531	0.156072	0.359493	0.434143	0.664184	0.739217
CHTF18	1198.15	1.33837	0.232608	5.75376	8.72791e-09	3.12003e-08
CHTF8	492.094	1.44315	0.176216	8.18968	2.6193e-16	1.74931e-15
CHTOP	833.909	0.401944	0.101111	3.97528	7.02962e-05	0.000166194
CHUK	307.983	0.938003	0.145394	6.45147	1.10769e-10	4.68657e-10
CHURC1	395.32	1.04418	0.190052	5.49418	3.92521e-08	1.31265e-07
CIAO1	848.453	0.815656	0.22995	3.5471	0.000389492	0.000842972
CIAPIN1	318.671	1.08432	0.166689	6.50505	7.76692e-11	3.33538e-10
CIB1	397.367	0.591189	0.121058	4.8835	1.04219e-06	3.01549e-06
CIC	1737.96	-1.07196	0.223845	-4.78884	1.67744e-06	4.75352e-06
CIDEB	350.302	0.939378	0.366685	2.56181	0.0104128	0.018404
CIITA	4164.33	-1.67007	0.179976	-9.27937	1.70482e-20	1.51076e-19
CINP	302.171	0.0859159	0.355246	0.241849	0.808897	0.862063
CIR1	303.3	-1.08287	0.254764	-4.2505	2.13296e-05	5.37341e-05
CIRBP	2793.23	0.721205	0.138555	5.20518	1.93809e-07	6.03971e-07
CIT	1508.37	0.757856	0.189249	4.00455	6.2136e-05	0.000147885
CITED2	1447.52	2.29385	0.147353	15.567	1.21966e-54	5.62897e-53
CITED4	459.083	3.04963	0.253817	12.0151	2.95999e-33	5.41765e-32
CIZ1	704.493	0.395081	0.198054	1.99481	0.0460634	0.072046
CKAP2	427.039	1.80356	0.204472	8.8206	1.13849e-18	8.99194e-18
CKAP5	1621.19	0.972236	0.209611	4.63829	3.51312e-06	9.62747e-06
CLASP1	2206.37	-0.803121	0.151054	-5.31679	1.05616e-07	3.3788e-07
CLASP2	1275.76	-0.755369	0.205182	-3.68145	0.000231907	0.000516713
CLASRP	1193.62	-0.820688	0.160498	-5.11338	3.16441e-07	9.66135e-07
CLC	1198.76	6.73366	0.147135	45.7653	0	0
CLCC1	571.171	0.269591	0.131894	2.04399	0.0409541	0.0647271
CLCN3	670.321	0.706549	0.134826	5.24044	1.60197e-07	5.02946e-07
CLCN6	679.413	-2.25736	0.204085	-11.0608	1.9425e-28	2.75232e-27
CLCN7	2142.03	-0.374941	0.245936	-1.52455	0.127371	0.180844
CLEC11A	4548.06	3.57564	0.244065	14.6504	1.34013e-48	4.82493e-47
CLEC12A	432.963	-0.00281698	0.184801	-0.0152433	0.987838	1
CLEC16A	1407.89	-0.528291	0.137082	-3.85384	0.000116281	0.00026827
CLEC7A	574.939	-2.04835	0.130636	-15.6798	2.08069e-55	9.98248e-54
CLIC1	2708.37	1.2023	0.0971914	12.3705	3.77613e-35	7.57797e-34
CLIC4	484.501	0.00350366	0.152885	0.022917	0.981716	0.997823
CLINT1	1692.55	0.818513	0.0897533	9.11958	7.54139e-20	6.42357e-19
CLIP1	1751.18	-1.50882	0.232421	-6.49178	8.48295e-11	3.63077e-10
CLIP2	1410.33	-1.67471	0.203354	-8.23543	1.78918e-16	1.20782e-15
CLIP4	522.247	-1.58879	0.218915	-7.25757	3.94095e-13	2.05827e-12
CLK1	1956.89	-1.26854	0.180442	-7.03022	2.06214e-12	1.01045e-11
CLK2	654.981	0.469367	0.107166	4.37984	1.18769e-05	3.07429e-05
CLK3	1449.25	-0.235201	0.0785685	-2.99357	0.0027573	0.0053127
CLK4	636.363	-1.07706	0.18298	-5.88623	3.95104e-09	1.4558e-08
CLN3	912.057	-1.28415	0.131165	-9.79038	1.23834e-22	1.26096e-21
CLN6	514.322	1.07573	0.161077	6.67836	2.41638e-11	1.08087e-10
CLN8	621.251	-0.9438	0.209204	-4.51138	6.44079e-06	1.71804e-05
CLNS1A	1093.53	2.0027	0.184983	10.8264	2.58104e-27	3.44417e-26
CLPB	752.166	1.38149	0.113569	12.1643	4.81842e-34	9.20408e-33
CLPTM1	380.984	0.141329	0.211796	0.66729	0.504587	0.590684
CLPTM1L	916.708	1.0665	0.163294	6.53119	6.52478e-11	2.82075e-10
CLPX	687.711	0.30492	0.184278	1.65468	0.0979902	0.142986
CLSPN	680.997	2.37922	0.178772	13.3087	2.06011e-40	5.36616e-39
CLSTN1	939.849	0.609536	0.142974	4.26325	2.01471e-05	5.08545e-05
CLSTN3	931.427	-1.16537	0.232501	-5.01232	5.37763e-07	1.60018e-06
CLTA	980.628	1.64155	0.145794	11.2594	2.08248e-29	3.07527e-28
CLTB	338.543	1.03557	0.218671	4.73575	2.18241e-06	6.1123e-06
CLTC	3070.96	0.209243	0.162109	1.29075	0.196789	0.264997
CLUH	1265.32	1.05107	0.256652	4.09533	4.21575e-05	0.000102524
CLUHP3	607.676	-0.717033	0.160613	-4.46435	8.0311e-06	2.11815e-05
CMAHP	561.975	-0.46488	0.150449	-3.08994	0.00200197	0.00393584
CMIP	703.834	-1.69497	0.226716	-7.47618	7.65149e-14	4.21271e-13
CMPK1	568.661	1.21068	0.157202	7.70143	1.34555e-14	7.89497e-14
CMPK2	339.636	0.625865	0.205701	3.0426	0.00234544	0.00456433
CMSS1	571.601	1.0791	0.191236	5.6428	1.67308e-08	5.8205e-08
CMTM3	478.39	0.581743	0.241344	2.41044	0.0159335	0.0272787
CMTM6	1329.8	0.728336	0.160793	4.52965	5.90803e-06	1.58351e-05
CMTM7	324.649	0.70749	0.233907	3.02467	0.00248905	0.00482469
CMTR1	1093.23	0.174855	0.120612	1.44973	0.147134	0.205399
CNBP	1615.93	0.478013	0.110337	4.33231	1.47554e-05	3.77439e-05
CNDP2	943.54	0.399079	0.139972	2.85113	0.00435646	0.00815996
CNKSR3	774.727	-0.767038	0.15292	-5.01594	5.27741e-07	1.57285e-06
CNN2	1703.63	0.256766	0.0986366	2.60316	0.00923702	0.0164816
CNNM2	353.95	-0.431371	0.378289	-1.14032	0.254153	0.330695
CNNM3	446.836	1.1631	0.279247	4.16511	3.11197e-05	7.69506e-05
CNNM4	307.864	-0.302925	0.219225	-1.3818	0.167034	0.229654
CNOT1	2592	-0.0142745	0.0941448	-0.151622	0.879485	0.918829
CNOT10	573.128	-0.712158	0.137992	-5.16088	2.45795e-07	7.58073e-07
CNOT11	334.184	1.35593	0.344717	3.93346	8.37334e-05	0.000196119
CNOT2	928.92	-0.573329	0.217486	-2.63616	0.00838495	0.0150458
CNOT3	441.334	-0.0143908	0.226129	-0.0636396	0.949257	0.973222
CNOT4	521.273	-0.986884	0.1843	-5.35477	8.56651e-08	2.76828e-07
CNOT6	536.769	0.570521	0.281714	2.02518	0.0428492	0.0674638
CNOT6L	742.85	-0.415201	0.116515	-3.5635	0.000365942	0.000794829
CNOT7	550.928	1.13206	0.171937	6.58418	4.57406e-11	2.00943e-10
CNOT8	751.421	0.603339	0.119719	5.03963	4.66432e-07	1.39943e-06
CNP	593.755	0.562334	0.129083	4.35639	1.32225e-05	3.39998e-05
CNPPD1	563.834	0.405884	0.110269	3.68087	0.000232441	0.000517847
CNPY2	515.23	1.06079	0.150012	7.07134	1.53441e-12	7.61301e-12
CNPY3	1706.35	0.895391	0.178157	5.02585	5.01214e-07	1.49812e-06
CNR2	378.582	-1.89514	0.16369	-11.5776	5.34943e-31	8.63527e-30
CNST	1208.03	0.154365	0.105509	1.46305	0.143454	0.200832
CNTLN	409.816	0.786176	0.145479	5.40405	6.51522e-08	2.13144e-07
CNTRL	2818.97	0.36913	0.114908	3.2124	0.00131629	0.00266019
CNTROB	1320.19	0.828263	0.116427	7.11403	1.12701e-12	5.65424e-12
COA1	530.814	0.745109	0.134916	5.52277	3.33692e-08	1.12669e-07
COASY	477.135	0.714959	0.163872	4.36291	1.28341e-05	3.30711e-05
COG1	415.961	-1.11044	0.185895	-5.97349	2.32227e-09	8.73923e-09
COG2	342.503	1.05917	0.138558	7.64424	2.10188e-14	1.21326e-13
COG3	561.519	0.057499	0.175152	0.32828	0.7427	0.807734
COG4	746.136	0.395627	0.117021	3.38084	0.000722658	0.00151186
COG5	598.128	-0.405417	0.158706	-2.55452	0.0106335	0.0187543
COG7	443.126	-1.59142	0.207259	-7.67842	1.61062e-14	9.37825e-14
COG8	508.397	1.231	0.190778	6.45251	1.10016e-10	4.65659e-10
COL18A1	301.047	1.13364	0.249681	4.54038	5.61536e-06	1.50801e-05
COL24A1	2107.92	0.121121	0.146769	0.825244	0.409233	0.495712
COL4A3BP	704.671	-0.930984	0.110833	-8.39989	4.46902e-17	3.15631e-16
COL4A5	4116.57	-0.645343	1.10912	-0.581854	0.560665	0.644195
COL5A1	991.781	1.01356	0.45309	2.23699	0.0252872	0.0416973
COL6A3	343.294	-1.30448	0.904458	-1.44227	0.149225	0.207938
COL9A2	503.305	0.453419	0.17509	2.58963	0.00960778	0.0170869
COLGALT1	1557.92	0.528071	0.142095	3.71632	0.000202145	0.00045388
COMMD2	354.616	0.322444	0.243488	1.32427	0.185413	0.251765
COMMD3	429.579	1.445	0.215626	6.70142	2.06397e-11	9.27866e-11
COMMD4	422.421	1.40602	0.131617	10.6826	1.22779e-26	1.58407e-25
COMMD9	374.34	1.44681	0.372542	3.88361	0.000102919	0.000238939
COMT	1483.97	2.09278	0.209928	9.96905	2.08215e-23	2.21989e-22
COPA	2022.27	-0.0262071	0.137353	-0.190801	0.848682	0.893828
COPB1	1036.2	1.11507	0.158344	7.04208	1.89389e-12	9.30927e-12
COPB2	1126.25	0.648816	0.167111	3.88254	0.000103373	0.00023994
COPE	984.762	1.60676	0.226707	7.08738	1.36678e-12	6.80095e-12
COPG1	922.659	0.285635	0.144844	1.97202	0.0486077	0.0755957
COPG2	304.244	1.63426	0.322493	5.06757	4.02929e-07	1.2183e-06
COPS2	428.09	0.0592877	0.139219	0.425858	0.670212	0.744599
COPS3	584.817	1.30582	0.0890619	14.662	1.12974e-48	4.08888e-47
COPS5	645.587	1.32128	0.141228	9.35568	8.30668e-21	7.53592e-20
COPS6	559.371	0.762254	0.377238	2.02062	0.0433195	0.0681263
COPS7A	369.495	0.655308	0.126397	5.18451	2.16586e-07	6.71501e-07
COPS7B	479.901	-1.39632	0.25846	-5.40247	6.57308e-08	2.14833e-07
COPZ1	461.377	1.59244	0.194622	8.18224	2.78606e-16	1.85647e-15
COQ4	586.572	0.695338	0.136776	5.08378	3.69994e-07	1.12184e-06
COQ6	413.021	-0.489641	0.166348	-2.94348	0.0032454	0.00618901
CORO1A	4969.8	1.20855	0.187162	6.45725	1.06622e-10	4.5213e-10
CORO1B	415.594	0.180247	0.271101	0.664871	0.506133	0.592125
CORO1C	1182.75	-0.442323	0.0972513	-4.54825	5.4094e-06	1.45497e-05
CORO7	1772.6	-1.11608	0.155939	-7.15717	8.23621e-13	4.18196e-12
COTL1	1735.19	0.15118	0.239823	0.630384	0.528443	0.613494
COX15	331.813	1.05938	0.126488	8.37529	5.50861e-17	3.86408e-16
COX18	375.14	0.195398	0.16141	1.21057	0.22606	0.298778
COX19	349.709	-0.876896	0.193553	-4.53052	5.88389e-06	1.57745e-05
COX4I1	1725.32	1.69255	0.144693	11.6976	1.31157e-31	2.18736e-30
COX5A	359.257	2.18895	0.129542	16.8976	4.68264e-64	3.01884e-62
COX5B	536.342	1.79721	0.196742	9.13487	6.54839e-20	5.59624e-19
COX6A1	661.283	2.19182	0.137969	15.8863	7.87887e-57	3.99364e-55
COX6B1	768.317	2.00799	0.153049	13.1199	2.53362e-39	6.24475e-38
COX6C	449.63	2.04375	0.19748	10.3492	4.22124e-25	5.0106e-24
COX7A2	417.935	1.94097	0.264151	7.34795	2.01273e-13	1.07321e-12
COX7A2L	516.668	1.93657	0.136088	14.2303	5.94553e-46	1.94076e-44
COX7B	659.277	1.17386	0.169439	6.9279	4.27121e-12	2.04065e-11
COX7C	824.704	2.12862	0.242094	8.79253	1.46231e-18	1.14575e-17
COX8A	700.551	2.27738	0.189113	12.0424	2.12617e-33	3.94805e-32
CPA3	614.807	3.32616	0.134683	24.6962	1.17508e-134	4.48925e-132
CPD	1662.62	0.12224	0.158396	0.771736	0.440271	0.528161
CPEB4	1061.77	-1.42503	0.161006	-8.85078	8.69064e-19	6.91697e-18
CPM	373.013	0.91007	0.282255	3.22428	0.0012629	0.00255628
CPNE1	1198.16	0.784001	0.158023	4.96132	7.00164e-07	2.05652e-06
CPNE2	543.132	1.5578	0.208069	7.48696	7.04872e-14	3.89227e-13
CPNE3	408.053	0.936902	0.174379	5.37278	7.75304e-08	2.51882e-07
CPOX	882.995	1.99855	0.239383	8.34877	6.89771e-17	4.80255e-16
CPPED1	665.238	-0.71482	0.221437	-3.2281	0.00124616	0.00252463
CPSF1	1804.29	0.683986	0.197075	3.47068	0.000519142	0.00110617
CPSF2	862.464	0.399475	0.165741	2.41024	0.0159421	0.0272911
CPSF3	510.562	1.89711	0.115677	16.4	1.91136e-60	1.1234e-58
CPSF3L	1419.23	0.243611	0.126312	1.92865	0.0537743	0.0829122
CPSF4	341.214	0.827792	0.115227	7.184	6.77009e-13	3.46912e-12
CPSF6	1626.46	0.639446	0.176311	3.62681	0.000286945	0.000632511
CPSF7	736.308	0.0840496	0.08287	1.01423	0.310471	0.391241
CPT1A	2488.8	0.881571	0.0782705	11.2631	1.99551e-29	2.95106e-28
CPT1B	876.351	-0.096888	0.0979952	-0.988702	0.322809	0.404541
CPVL	508.742	-0.702378	0.254397	-2.76095	0.00576334	0.0106064
CPXM1	1909.1	2.56835	0.123505	20.7955	4.75044e-96	7.42435e-94
CR1	754.722	-0.956517	0.17371	-5.50639	3.66265e-08	1.22923e-07
CRAMP1L	1004.16	-0.630456	0.168781	-3.73535	0.000187458	0.000422189
CRBN	450.361	-0.0187237	0.159804	-0.117166	0.906728	0.940425
CRCP	735.802	0.197102	0.175962	1.12014	0.262653	0.340189
CREB1	736.006	-0.624788	0.226575	-2.75754	0.00582389	0.0107111
CREB3L2	1122.78	0.174482	0.144619	1.2065	0.227626	0.300405
CREBBP	2111.39	-1.53709	0.103153	-14.901	3.24681e-50	1.25434e-48
CREBRF	670.704	-1.21893	0.138148	-8.82335	1.11081e-18	8.78344e-18
CREBZF	3174.36	0.573813	0.123987	4.62801	3.69197e-06	1.00814e-05
CREG1	900.033	1.1796	0.234471	5.03089	4.88218e-07	1.46246e-06
CRELD2	400.058	1.41461	0.126611	11.1729	5.53644e-29	8.07756e-28
CRHR1-IT1	319.659	-1.58071	0.225718	-7.00305	2.50442e-12	1.21826e-11
CRIM1	376.364	-0.964358	0.37097	-2.59956	0.00933447	0.0166382
CRIP1	823.009	-2.89592	0.257426	-11.2495	2.32846e-29	3.43361e-28
CRK	405.106	-0.533064	0.138451	-3.85019	0.000118028	0.000272057
CRKL	1595.37	1.13537	0.142609	7.96137	1.70141e-15	1.06752e-14
CRLF3	793.145	-0.34566	0.122637	-2.81856	0.00482399	0.00897294
CRLS1	442.615	1.39563	0.257248	5.42526	5.78716e-08	1.90261e-07
CRNKL1	367.671	0.92156	0.182395	5.05254	4.35976e-07	1.31206e-06
CROCC	1538.95	-0.771004	0.150769	-5.1138	3.15739e-07	9.64135e-07
CROCCP3	671.333	-2.26576	0.270775	-8.36767	5.87689e-17	4.11403e-16
CRTAP	869.207	0.350831	0.183151	1.91553	0.0554243	0.0852841
CRTC2	545.061	-1.83609	0.216522	-8.47991	2.25375e-17	1.63426e-16
CRTC3	517.136	-1.28906	0.134723	-9.56818	1.08802e-21	1.04642e-20
CRY2	464.623	-1.17275	0.120996	-9.69252	3.2443e-22	3.21623e-21
CRYBB2P1	439.475	-1.0992	0.174753	-6.29	3.17461e-10	1.2888e-09
CRYZL1	411.85	-1.57932	0.155152	-10.1792	2.45656e-24	2.77997e-23
CS	1075.14	0.173108	0.10465	1.65415	0.0980964	0.143121
CSAD	730.034	-2.00823	0.165289	-12.1498	5.74882e-34	1.0961e-32
CSDE1	3497.02	0.643071	0.0932412	6.89685	5.31674e-12	2.52249e-11
CSE1L	687.84	2.3611	0.116721	20.2285	5.49338e-91	7.65733e-89
CSF1R	1529.01	-1.03656	0.165981	-6.24502	4.23739e-10	1.70007e-09
CSF2RA	612.966	-1.47326	0.167897	-8.77478	1.71241e-18	1.33662e-17
CSF2RB	685.429	-0.720196	0.119822	-6.01053	1.84919e-09	7.02687e-09
CSF3R	7258.66	0.598628	0.0902451	6.63336	3.28121e-11	1.45483e-10
CSGALNACT2	589.013	-0.558896	0.153975	-3.6298	0.000283645	0.000625571
CSK	1237.82	-0.334078	0.161175	-2.07277	0.0381935	0.0607503
CSNK1A1	2296.32	0.363336	0.0991676	3.66386	0.000248445	0.000551892
CSNK1D	1573.91	-1.82243	0.166738	-10.9299	8.29145e-28	1.13807e-26
CSNK1E	940.412	-0.0819197	0.14683	-0.55792	0.576899	0.659578
CSNK1G1	477.67	0.310776	0.16306	1.9059	0.0566631	0.0869762
CSNK1G2	1563.96	-0.0795477	0.20368	-0.390553	0.696128	0.766867
CSNK2A1	809.554	0.54894	0.116565	4.70931	2.48552e-06	6.91708e-06
CSNK2A2	503.44	0.342055	0.166012	2.06042	0.039358	0.0624581
CSNK2B	793.928	0.915579	0.0743315	12.3175	7.29052e-35	1.44065e-33
CSPP1	460.77	-0.0660216	0.223942	-0.294816	0.768135	0.828711
CSRNP1	1128.96	-0.020598	0.125135	-0.164606	0.869254	0.910528
CSRP1	477.87	1.1719	0.156711	7.47809	7.54094e-14	4.15295e-13
CST3	3930.33	0.141916	0.185726	0.764114	0.444799	0.532479
CST7	685.876	4.98566	0.235692	21.1533	2.574e-99	4.31721e-97
CSTA	363.869	1.27395	0.190409	6.69058	2.2229e-11	9.97572e-11
CSTF2T	388.505	1.81981	0.0956657	19.0226	1.10868e-80	1.16695e-78
CTAGE5	523.282	-0.333024	0.134221	-2.48116	0.0130956	0.022785
CTB-133G6.1	1877.3	1.00189	0.121767	8.22788	1.9055e-16	1.2834e-15
CTBP1	2133.39	1.07877	0.148805	7.24957	4.18096e-13	2.17811e-12
CTBP2	910.191	-0.330957	0.20304	-1.63001	0.1031	0.149638
CTC1	769.316	-1.951	0.236869	-8.23664	1.7712e-16	1.19724e-15
CTCF	967.585	0.997683	0.131591	7.58169	3.41078e-14	1.94484e-13
CTD-2207O23.3	1398.45	1.38828	0.17099	8.11907	4.69772e-16	3.07176e-15
CTD-2328D6.1	316082	3.5972	1.61811	2.22308	0.0262103	0.0430989
CTD-2547E10.2	5022.94	-1.46818	0.151778	-9.67321	3.91876e-22	3.86629e-21
CTD-3088G3.8	555.107	-1.17542	0.16159	-7.27405	3.48877e-13	1.82999e-12
CTDNEP1	603.277	-0.383907	0.214497	-1.7898	0.0734863	0.110032
CTDP1	1765.04	-0.0358302	0.109293	-0.327837	0.743035	0.807887
CTDSP1	1232.06	0.125345	0.169473	0.739619	0.459531	0.547068
CTDSP2	1264.76	0.0714522	0.166511	0.429114	0.667841	0.742525
CTDSPL2	858.241	0.0487096	0.176306	0.276279	0.782334	0.840382
CTNNA1	1059.94	-0.807202	0.119556	-6.75167	1.46158e-11	6.6532e-11
CTNNB1	2436.42	-0.128168	0.172637	-0.742415	0.457836	0.545385
CTNNBIP1	369.517	1.86604	0.158766	11.7534	6.78586e-32	1.14936e-30
CTNNBL1	513.145	0.797073	0.167963	4.74553	2.07964e-06	5.8419e-06
CTNND1	1448.22	-1.88054	0.162067	-11.6034	3.95841e-31	6.45039e-30
CTPS1	722.332	0.554098	0.165068	3.35679	0.000788536	0.00164185
CTPS2	357.935	1.00043	0.18277	5.4737	4.40738e-08	1.46605e-07
CTR9	562.21	0.99645	0.173303	5.74977	8.93673e-09	3.19191e-08
CTSA	1784.37	0.910619	0.0938854	9.69926	3.03684e-22	3.01492e-21
CTSB	2497.67	-0.414515	0.0919573	-4.50769	6.55382e-06	1.74661e-05
CTSC	1343.04	1.37858	0.199441	6.91222	4.77137e-12	2.27486e-11
CTSD	1945.11	0.0544692	0.248039	0.219599	0.826184	0.876172
CTSG	718.768	7.90886	0.193857	40.7975	0	0
CTSH	478.717	0.0859617	0.258187	0.332943	0.739177	0.804624
CTSS	3244.32	-0.878817	0.204937	-4.28823	1.80104e-05	4.57467e-05
CTSW	419.047	1.35771	0.134479	10.096	5.75371e-24	6.33061e-23
CTSZ	1643.65	0.308984	0.148033	2.08726	0.0368645	0.0589181
CUL1	700.532	1.44424	0.1154	12.5151	6.17516e-36	1.28292e-34
CUL2	305.152	0.544505	0.278261	1.95681	0.0503693	0.0780705
CUL3	939.519	-0.785357	0.102256	-7.68031	1.58709e-14	9.24646e-14
CUL4A	1276.02	0.194885	0.125098	1.55785	0.119268	0.170537
CUL4B	387.215	0.727652	0.225936	3.22062	0.00127915	0.00258816
CUL5	707.106	-0.394068	0.18451	-2.13575	0.0326994	0.0527724
CUL7	525.428	0.628089	0.0977156	6.42772	1.2953e-10	5.44679e-10
CUL9	1458.81	-0.290451	0.114855	-2.52884	0.011444	0.0200876
CUTA	409.685	2.1777	0.130865	16.6408	3.52922e-62	2.1669e-60
CUX1	3486.51	-0.899961	0.149693	-6.01203	1.83216e-09	6.96343e-09
CWC15	313.416	1.04655	0.126068	8.30148	1.02819e-16	7.08234e-16
CWC25	1273.66	-0.575472	0.131168	-4.3873	1.14768e-05	2.9782e-05
CWF19L1	591.09	-0.0512869	0.14825	-0.345949	0.729381	0.796145
CWF19L2	448.353	0.241457	0.133322	1.81108	0.070128	0.105455
CXCL14	388.514	-1.88507	1.11086	-1.69695	0.0897057	0.132018
CXCL2	307.029	1.01808	0.260564	3.90723	9.33593e-05	0.000217824
CXCR4	2801.22	1.54306	0.124825	12.3619	4.20271e-35	8.39322e-34
CXorf21	571.757	1.87403	0.182307	10.2795	8.71605e-25	1.01417e-23
CXorf38	318.9	-0.375803	0.1595	-2.35613	0.0184665	0.0312342
CXorf56	448.637	-0.255615	0.165098	-1.54826	0.12156	0.173478
CXXC1	948.17	1.04817	0.168811	6.20912	5.32834e-10	2.11799e-09
CXXC5	833.79	-0.421355	0.159334	-2.64448	0.00818177	0.014703
CYB561A3	918.333	-0.0457309	0.10542	-0.433795	0.664437	0.739459
CYB5B	475.237	1.59649	0.13189	12.1047	9.97516e-34	1.8847e-32
CYB5R3	724.702	0.0225573	0.142366	0.158446	0.874106	0.914535
CYB5R4	966.69	0.304808	0.161555	1.88671	0.0591995	0.090479
CYB5RL	371.53	-0.522687	0.162957	-3.20752	0.00133883	0.00270282
CYBA	2998.68	1.6821	0.270732	6.21316	5.19307e-10	2.06701e-09
CYBB	2098.99	-0.569264	0.131662	-4.32369	1.53443e-05	3.91821e-05
CYBRD1	558.716	-0.723265	0.16225	-4.45772	8.28348e-06	2.17997e-05
CYC1	717.726	2.14959	0.183889	11.6896	1.44115e-31	2.40152e-30
CYCS	762.98	1.9165	0.210484	9.10518	8.61226e-20	7.29955e-19
CYFIP1	768.727	-0.220492	0.189505	-1.16351	0.244621	0.320008
CYFIP2	1138.24	-0.865714	0.136523	-6.34114	2.28077e-10	9.39731e-10
CYHR1	565.506	0.954179	0.214162	4.45541	8.37347e-06	2.20197e-05
CYLD	1493.55	-0.965154	0.208021	-4.63969	3.4894e-06	9.56503e-06
CYP20A1	330.325	0.0244139	0.146237	0.166948	0.867411	0.908913
CYP3A5	601.017	-2.218	0.153179	-14.4798	1.62577e-47	5.61803e-46
CYP4V2	495.064	-0.474309	0.190942	-2.48405	0.0129897	0.0226179
CYP51A1	533.444	0.362987	0.110475	3.28571	0.00101726	0.00208693
CYSLTR1	618.584	0.218949	0.195775	1.11837	0.263409	0.340954
CYTH1	1746.56	-2.02541	0.0647229	-31.2936	5.70136e-215	8.40136e-212
CYTH2	1303.94	-0.022964	0.141324	-0.162492	0.870919	0.911848
CYTH4	876.252	-1.46958	0.175335	-8.38153	5.22425e-17	3.6696e-16
CYTIP	758.446	-1.81085	0.151164	-11.9794	4.55697e-33	8.2105e-32
D2HGDH	956.041	-0.910142	0.185281	-4.91221	9.00533e-07	2.62105e-06
DAAM1	422.59	-2.32638	0.259555	-8.96295	3.16116e-19	2.5797e-18
DACT3	442.053	-1.95367	0.301417	-6.48161	9.0746e-11	3.87436e-10
DAD1	357.294	2.22161	0.201852	11.0061	3.57045e-28	4.98029e-27
DAGLB	952.839	-0.627599	0.140552	-4.46524	7.99781e-06	2.11045e-05
DAK	398.183	0.370869	0.16305	2.27457	0.0229316	0.0381146
DAP	315.896	0.636711	0.278212	2.28859	0.0221034	0.036842
DAP3	773.127	0.981292	0.1297	7.56587	3.85289e-14	2.18426e-13
DAPK1	2378.31	-1.33004	0.223253	-5.95754	2.56069e-09	9.59793e-09
DAPK3	341.66	0.618551	0.196967	3.14038	0.00168731	0.00335673
DAPP1	422.696	0.15529	0.164107	0.946275	0.344008	0.426971
DARS	745.87	1.61611	0.128683	12.5589	3.55312e-36	7.45686e-35
DARS2	319.339	1.82538	0.137893	13.2377	5.31618e-40	1.3624e-38
DAXX	423.821	1.52739	0.292393	5.22375	1.75334e-07	5.48633e-07
DAZAP1	1860.19	1.117	0.168617	6.62445	3.4854e-11	1.54333e-10
DAZAP2	1219.92	0.783674	0.138108	5.67435	1.39214e-08	4.8777e-08
DBF4B	475.155	-0.388542	0.140584	-2.76377	0.00571376	0.0105227
DBI	742.608	1.35216	0.159484	8.47831	2.28491e-17	1.65511e-16
DBNL	2101.8	0.745338	0.130243	5.72268	1.04856e-08	3.71298e-08
DBT	647.356	-0.466505	0.202553	-2.30313	0.0212716	0.0355705
DCAF10	541.564	0.592608	0.313757	1.88875	0.0589258	0.0900808
DCAF11	1947.59	0.745234	0.152844	4.87579	1.08374e-06	3.13132e-06
DCAF12	526.666	1.64582	0.149001	11.0457	2.29952e-28	3.24037e-27
DCAF13	436.313	2.21897	0.144024	15.4069	1.47125e-53	6.52727e-52
DCAF15	623.56	0.086899	0.242655	0.358117	0.720255	0.788185
DCAF16	990.807	0.411183	0.146588	2.80502	0.00503138	0.00933429
DCAF5	546.938	-0.534941	0.125269	-4.27034	1.95178e-05	4.93688e-05
DCAF6	683.308	0.166009	0.138167	1.20151	0.229553	0.302503
DCAF7	919.578	0.834623	0.164489	5.07404	3.89449e-07	1.17892e-06
DCAF8	2503.76	-0.0355453	0.125793	-0.282571	0.777506	0.836416
DCK	574.464	1.9033	0.314523	6.05138	1.43612e-09	5.50382e-09
DCLRE1C	478.855	0.0896419	0.184608	0.485581	0.627264	0.706126
DCP2	1068.21	0.743254	0.283337	2.62321	0.00871045	0.0155946
DCTD	406.71	1.4504	0.134704	10.7673	4.91138e-27	6.45773e-26
DCTN1	1548.68	0.92075	0.131563	6.99857	2.58583e-12	1.25697e-11
DCTN2	442.72	0.0320399	0.134371	0.238444	0.811536	0.864505
DCTN4	704.998	-1.39674	0.194339	-7.18713	6.61669e-13	3.39353e-12
DCTN5	615.763	-0.236584	0.127401	-1.857	0.0633118	0.0961657
DCUN1D1	606.822	0.347904	0.148588	2.34141	0.0192113	0.0323904
DCUN1D2	411.758	-1.06512	0.182401	-5.83945	5.23729e-09	1.91095e-08
DDAH2	571.038	0.542925	0.195737	2.77374	0.00554157	0.0102256
DDB1	1.48238e+06	0.110066	0.36248	0.303647	0.761397	0.823293
DDB2	553.963	1.03754	0.0701781	14.7843	1.84861e-49	6.83455e-48
DDC8	317.709	-4.56362	0.229431	-19.891	4.86699e-88	5.90623e-86
DDHD1	1149.5	-1.50371	0.158312	-9.4984	2.13139e-21	2.01422e-20
DDHD2	736.214	-0.616003	0.202442	-3.04286	0.00234343	0.00456127
DDI2	1479.13	-0.817789	0.155669	-5.25339	1.49328e-07	4.70614e-07
DDIT3	310.26	-1.13202	0.1374	-8.23881	1.73933e-16	1.17608e-15
DDIT4	432.182	1.26547	0.155409	8.1428	3.86245e-16	2.5417e-15
DDOST	1974.01	2.00824	0.173876	11.5498	7.39844e-31	1.18226e-29
DDRGK1	476.297	1.24803	0.117222	10.6467	1.80634e-26	2.30029e-25
DDT	388.984	2.08942	0.204463	10.2191	1.62885e-24	1.86064e-23
DDX1	550.383	1.54505	0.175825	8.78746	1.52978e-18	1.19588e-17
DDX10	909.373	0.261508	0.153184	1.70715	0.0877948	0.1294
DDX11	2620.98	0.632993	0.115123	5.49838	3.83289e-08	1.28323e-07
DDX12P	1653.53	0.787398	0.143227	5.49754	3.85125e-08	1.28896e-07
DDX17	12126.3	0.232273	0.107533	2.16002	0.0307712	0.0498854
DDX18	660.767	0.837337	0.229688	3.64553	0.000266837	0.000590523
DDX19A	1029.45	-0.29339	0.147221	-1.99286	0.0462771	0.07232
DDX19B	373.766	-0.107278	0.132073	-0.812264	0.41664	0.503473
DDX20	323.174	0.908481	0.235414	3.85908	0.000113814	0.000262785
DDX21	1692.89	1.52591	0.111724	13.6578	1.81274e-42	5.1019e-41
DDX23	1714.37	0.373039	0.127508	2.92561	0.0034378	0.00652395
DDX24	1586.07	0.538983	0.096325	5.59547	2.20028e-08	7.56403e-08
DDX26B	591.254	0.403133	0.103719	3.8868	0.000101575	0.00023598
DDX27	1241.64	0.710115	0.162472	4.37071	1.23846e-05	3.19568e-05
DDX31	315.065	0.894064	0.145532	6.14341	8.07706e-10	3.16006e-09
DDX39A	1590.5	1.01595	0.134557	7.55029	4.34275e-14	2.45186e-13
DDX39B	7110.89	0.781324	0.119374	6.54518	5.94246e-11	2.57982e-10
DDX3X	3596.18	0.0902264	0.0966199	0.933829	0.350392	0.433759
DDX3Y	534.384	-2.03281	1.45256	-1.39947	0.161673	0.223277
DDX41	954.276	0.984891	0.178884	5.50575	3.67603e-08	1.23332e-07
DDX42	1588.88	-0.316141	0.0852626	-3.70786	0.000209021	0.000468197
DDX46	1045.63	0.562001	0.141263	3.97841	6.93788e-05	0.000164289
DDX47	396.347	0.213181	0.162703	1.31024	0.190114	0.257251
DDX49	412.426	1.25254	0.178689	7.00958	2.39029e-12	1.16494e-11
DDX5	7153.21	-0.00155516	0.0917665	-0.0169469	0.986479	1
DDX50	460.382	1.29131	0.230116	5.61156	2.00505e-08	6.91825e-08
DDX51	1180.64	-0.181718	0.168971	-1.07544	0.282177	0.36137
DDX52	757.058	0.234369	0.230855	1.01522	0.31	0.3907
DDX54	1265.4	0.665457	0.155535	4.27851	1.88149e-05	4.7667e-05
DDX55	772.415	-0.0228596	0.100418	-0.227645	0.819922	0.871278
DDX56	720.229	0.871639	0.119146	7.31571	2.56029e-13	1.35433e-12
DDX59	375.445	0.147382	0.132595	1.11152	0.266346	0.344108
DDX6	1918.18	0.00384365	0.148948	0.0258053	0.979413	0.996316
DDX60	372.21	0.357104	0.23766	1.50258	0.132947	0.187741
DDX60L	700.645	-1.01541	0.198988	-5.10288	3.34522e-07	1.01818e-06
DEAF1	488.539	0.88073	0.218555	4.0298	5.58254e-05	0.000133652
DECR1	332.421	0.310958	0.194099	1.60206	0.109143	0.157389
DEDD2	478.191	-0.562871	0.198796	-2.8314	0.00463442	0.00864449
DEF6	1441.85	0.229253	0.116985	1.95968	0.0500337	0.0776087
DEF8	550.983	-0.552819	0.16298	-3.39194	0.000694001	0.00145471
DEFA1	1943.95	7.53149	0.271139	27.7772	8.17336e-170	6.74466e-167
DEFA3	773.902	7.22117	0.215741	33.4714	1.25506e-245	2.87687e-242
DEGS1	412.042	0.636807	0.134301	4.74166	2.11978e-06	5.94576e-06
DEK	2374.25	1.28422	0.111757	11.4913	1.45963e-30	2.28989e-29
DENND1A	1281.92	-1.26199	0.104823	-12.0393	2.20947e-33	4.09536e-32
DENND1B	1134.32	0.0914557	0.114259	0.800422	0.423466	0.510539
DENND1C	644.024	-0.894806	0.182301	-4.9084	9.18235e-07	2.66956e-06
DENND3	4000.64	-0.732858	0.13458	-5.44551	5.16585e-08	1.70569e-07
DENND4A	1587.21	-1.63942	0.27767	-5.90418	3.54394e-09	1.3126e-08
DENND4B	2104.53	-1.13511	0.154578	-7.34326	2.08447e-13	1.11089e-12
DENND4C	824.992	-0.723883	0.185328	-3.90595	9.38557e-05	0.000218933
DENND5A	1701.02	-0.943202	0.160141	-5.88982	3.86625e-09	1.42506e-08
DENND6A	1176.8	-0.779753	0.131583	-5.92596	3.10478e-09	1.1545e-08
DENND6B	343.904	0.346953	0.172235	2.01441	0.043966	0.0690221
DENR	591.264	0.728302	0.145204	5.01573	5.28331e-07	1.57416e-06
DEPDC5	968.395	-0.40234	0.150955	-2.66529	0.00769224	0.0138849
DERL1	508.348	0.914349	0.214079	4.27108	1.94531e-05	4.92172e-05
DESI1	444.045	0.210137	0.163329	1.28658	0.198239	0.266776
DESI2	320.716	0.431639	0.113038	3.81854	0.000134243	0.000307612
DFFA	999.245	0.78557	0.336172	2.33681	0.0194491	0.0327458
DFFB	349.099	-0.350828	0.120323	-2.91573	0.00354857	0.00672426
DGAT1	441.109	0.182538	0.237785	0.76766	0.442689	0.530538
DGCR14	332.321	0.437124	0.190894	2.28988	0.0220285	0.0367378
DGCR2	958.547	0.740834	0.207856	3.56416	0.00036502	0.000793087
DGCR8	1065.48	0.687257	0.156235	4.39886	1.08822e-05	2.82924e-05
DGKA	1056.31	-1.75709	0.120451	-14.5876	3.36779e-48	1.19377e-46
DGKD	2493.82	-1.61194	0.176378	-9.13911	6.29656e-20	5.38996e-19
DGKG	471.433	0.077272	0.105101	0.735219	0.462206	0.549649
DGKQ	668.801	-0.108692	0.281767	-0.385752	0.699681	0.769917
DGKZ	3588.77	0.418433	0.183813	2.27641	0.0228215	0.03795
DHDDS	302.682	0.275491	0.135755	2.02933	0.0424246	0.0668311
DHFR	944.634	3.37631	0.347078	9.7278	2.29511e-22	2.29622e-21
DHPS	496.209	0.907261	0.226627	4.00333	6.24563e-05	0.000148596
DHRS7	311.363	0.687084	0.179432	3.82922	0.000128552	0.00029503
DHRSX	368.19	-1.07895	0.149733	-7.20583	5.76928e-13	2.96957e-12
DHTKD1	854.69	1.0528	0.181851	5.78939	7.06444e-09	2.54834e-08
DHX15	2565.3	0.649333	0.118463	5.48133	4.22133e-08	1.40688e-07
DHX16	707.384	1.09739	0.153904	7.13033	1.00126e-12	5.05038e-12
DHX29	396.949	0.68064	0.344701	1.97458	0.0483159	0.0751986
DHX30	1278.8	0.423904	0.112998	3.75142	0.000175837	0.000397188
DHX33	377.63	1.12736	0.135366	8.32827	8.20328e-17	5.69427e-16
DHX34	478.474	-0.167453	0.227866	-0.734874	0.462416	0.549774
DHX35	339.708	-0.0763925	0.150307	-0.508243	0.611283	0.691607
DHX36	903.788	-1.0244	0.193178	-5.30286	1.14001e-07	3.63332e-07
DHX37	863.837	0.117901	0.116899	1.00857	0.31318	0.394223
DHX38	1841.76	-0.0564483	0.140353	-0.402189	0.687545	0.759318
DHX40	458.478	1.00424	0.206838	4.85522	1.20252e-06	3.45709e-06
DHX57	524.455	-1.20176	0.144257	-8.33067	8.03859e-17	5.58559e-16
DHX8	1083.39	0.349194	0.116141	3.00664	0.0026415	0.00510387
DHX9	2386.23	0.752761	0.0937275	8.03138	9.63849e-16	6.15801e-15
DIABLO	523.096	0.676351	0.230056	2.93994	0.00328271	0.00625437
DIAPH1	2813.83	-1.36397	0.145551	-9.37112	7.17665e-21	6.52509e-20
DIAPH2	953.645	0.329575	0.155788	2.11554	0.0343838	0.0552401
DIAPH3	386.188	1.80938	0.17514	10.3311	5.09801e-25	6.0167e-24
DICER1	2076.85	-0.275204	0.18275	-1.5059	0.132092	0.186724
DIDO1	2771.15	0.017128	0.100188	0.170958	0.864257	0.906638
DIP2A	1841.62	-0.724872	0.114286	-6.34264	2.25864e-10	9.30986e-10
DIP2B	2129.98	-0.308452	0.196099	-1.57294	0.115733	0.165873
DIS3	684.214	1.1496	0.101496	11.3265	9.70062e-30	1.46396e-28
DIS3L	718.074	0.398668	0.10866	3.66896	0.000243543	0.000541585
DIS3L2	865.907	-0.840891	0.178798	-4.70303	2.56328e-06	7.1181e-06
DISC1	955.819	-0.935621	0.0826859	-11.3154	1.10142e-29	1.65253e-28
DKC1	842.165	0.93058	0.235625	3.94941	7.8343e-05	0.000184205
DLD	538.135	0.831507	0.202364	4.10896	3.97443e-05	9.69063e-05
DLG1	1131.86	-0.260392	0.154638	-1.68388	0.0922054	0.135388
DLG5	408.539	-0.552366	0.145007	-3.80922	0.000139404	0.00031859
DLGAP4	301.6	-0.832395	0.251715	-3.30689	0.000943371	0.00194171
DLGAP5	376.254	3.81876	0.278761	13.699	1.02866e-42	2.92706e-41
DLST	1093.42	-1.23855	0.146248	-8.46887	2.47787e-17	1.78986e-16
DMAP1	601.706	0.360818	0.151431	2.38272	0.0171851	0.0292467
DMTF1	1030.77	-0.958934	0.213637	-4.48861	7.16884e-06	1.90143e-05
DMTN	803.298	2.27374	0.264345	8.60139	7.87558e-18	5.8697e-17
DMXL1	1129.28	-0.681404	0.217354	-3.13499	0.00171858	0.00341169
DMXL2	2268.66	-1.66882	0.178715	-9.33786	9.83003e-21	8.85562e-20
DNA2	362.406	0.759392	0.199663	3.80337	0.000142743	0.000325679
DNAH1	2489.43	-1.58427	0.189691	-8.35186	6.71959e-17	4.6817e-16
DNAJA1	915.05	1.33738	0.122619	10.9068	1.07006e-27	1.45904e-26
DNAJA2	518.34	0.910771	0.138143	6.59297	4.31118e-11	1.89516e-10
DNAJA3	640.337	-0.613149	0.248463	-2.46777	0.0135959	0.023582
DNAJA4	515.358	0.616611	0.114253	5.39687	6.78141e-08	2.21327e-07
DNAJB1	653.248	-0.346851	0.128434	-2.70062	0.00692108	0.0125932
DNAJB11	925.192	1.41493	0.14363	9.85127	6.76864e-23	6.97836e-22
DNAJB12	561.8	0.0317436	0.149229	0.212717	0.831548	0.880367
DNAJB14	517.589	-0.289083	0.227776	-1.26915	0.204386	0.273904
DNAJB6	1916.13	-0.121034	0.12644	-0.957242	0.338445	0.421083
DNAJC1	1387.57	0.416885	0.341698	1.22004	0.222449	0.294571
DNAJC10	1690.68	0.646377	0.203193	3.1811	0.00146717	0.00294449
DNAJC11	642.811	0.759778	0.194512	3.90608	9.38067e-05	0.000218843
DNAJC13	1159.53	0.645822	0.187271	3.4486	0.000563509	0.00119576
DNAJC14	655.501	0.0845433	0.158186	0.534454	0.593028	0.67469
DNAJC16	348.012	-1.37801	0.264498	-5.20992	1.88923e-07	5.89367e-07
DNAJC2	699.633	-0.117905	0.227905	-0.517342	0.604918	0.685571
DNAJC21	670.229	0.71238	0.151296	4.70852	2.49526e-06	6.94176e-06
DNAJC3	823.512	1.24832	0.0928435	13.4455	3.27344e-41	8.8276e-40
DNAJC5	1147.28	0.780532	0.151089	5.16604	2.39099e-07	7.38416e-07
DNAJC7	1241.56	-0.486643	0.162946	-2.98653	0.00282168	0.00542711
DNAJC8	622.476	1.64784	0.104341	15.7928	3.4863e-56	1.70837e-54
DNAJC9	628.726	2.4226	0.314877	7.69378	1.4285e-14	8.35554e-14
DNAL1	399.083	-1.40508	0.225273	-6.23721	4.45448e-10	1.78335e-09
DNASE1	751.631	-0.297303	0.118725	-2.50414	0.012275	0.0214514
DNHD1	581.603	-1.70549	0.263854	-6.46375	1.0214e-10	4.33749e-10
DNM1	714.503	-1.41713	0.194477	-7.28687	3.17249e-13	1.6679e-12
DNM1L	891.126	-0.0127734	0.219272	-0.0582535	0.953547	0.976552
DNM1P47	1227.51	-1.62302	0.193117	-8.40431	4.30381e-17	3.0438e-16
DNM2	2999.88	-0.818731	0.157788	-5.1888	2.11652e-07	6.56994e-07
DNMT1	3814.3	-0.516235	0.0956384	-5.39778	6.74707e-08	2.20275e-07
DNMT3A	1465.87	0.883621	0.10521	8.3986	4.5183e-17	3.1895e-16
DNMT3B	367.309	2.59408	0.17265	15.0251	5.02668e-51	2.00194e-49
DNPEP	533.394	0.488272	0.135052	3.61543	0.000299845	0.000659608
DNTTIP2	710.26	0.546309	0.162389	3.3642	0.00076766	0.00160016
DOCK10	1193.05	-0.912944	0.187496	-4.86915	1.12078e-06	3.232e-06
DOCK11	1519.26	0.114834	0.0867399	1.32389	0.185539	0.251904
DOCK2	5422.31	-0.323413	0.119463	-2.70722	0.00678485	0.0123617
DOCK5	2682.21	-1.48645	0.18707	-7.94595	1.92706e-15	1.20216e-14
DOCK7	642.683	-0.926927	0.181046	-5.11985	3.05774e-07	9.35785e-07
DOCK8	7253.47	-0.619857	0.0906662	-6.83669	8.10432e-12	3.77409e-11
DOK1	492.074	1.77664	0.148285	11.9812	4.45565e-33	8.03498e-32
DOK2	507.83	-0.163421	0.146422	-1.1161	0.264379	0.341952
DOK3	748.026	-0.0459068	0.2138	-0.214718	0.829987	0.879076
DONSON	350.277	1.17323	0.227488	5.15734	2.50486e-07	7.71734e-07
DOPEY1	424.633	0.0249086	0.36252	0.0687095	0.945221	0.970323
DOPEY2	1070.35	-0.442797	0.189156	-2.34091	0.0192366	0.0324251
DOT1L	2073.1	-1.26211	0.140233	-9.00007	2.25578e-19	1.85924e-18
DPEP2	371.829	-0.806949	0.280169	-2.88022	0.00397399	0.00748092
DPF2	814.951	-0.496562	0.0973992	-5.09822	3.4287e-07	1.04297e-06
DPH1	877.471	-0.546468	0.128318	-4.2587	2.0562e-05	5.18764e-05
DPH7	405.269	0.84369	0.138695	6.08308	1.17897e-09	4.55726e-09
DPP3	576.237	1.53896	0.21309	7.22212	5.11837e-13	2.64509e-12
DPP7	1156.82	1.09796	0.238346	4.6066	4.09299e-06	1.11249e-05
DPP8	514.983	0.02852	0.15919	0.179157	0.857814	0.901475
DPP9	984.621	-0.528708	0.170567	-3.09971	0.00193712	0.00381469
DPPA4	554.36	-2.44442	0.351049	-6.9632	3.32629e-12	1.60368e-11
DPY19L2	317.014	0.873112	0.199091	4.3855	1.15722e-05	3.0022e-05
DPY19L2P2	389.267	0.347148	0.240298	1.44466	0.148553	0.207141
DPY19L3	793.311	0.13372	0.0989758	1.35104	0.176682	0.241339
DPY19L4	503.637	0.840347	0.233182	3.60383	0.000313568	0.000688474
DPYD	1720.14	-0.554684	0.128833	-4.30544	1.66655e-05	4.24456e-05
DPYSL2	407.171	-1.01974	0.272322	-3.74462	0.000180667	0.000407606
DR1	968.257	1.11584	0.125334	8.90299	5.43642e-19	4.36905e-18
DRAM1	351.401	-0.602502	0.113705	-5.29882	1.16556e-07	3.71358e-07
DRAP1	559.144	1.25729	0.210266	5.97951	2.23807e-09	8.4316e-09
DRG1	330.446	1.6452	0.184265	8.92845	4.32029e-19	3.49246e-18
DRG2	376.953	0.807712	0.137832	5.86013	4.62498e-09	1.69563e-08
DROSHA	714.663	-0.281615	0.121249	-2.32262	0.0201996	0.0339236
DSCR3	623.118	0.134919	0.123016	1.09676	0.272746	0.351145
DSE	585.377	-0.321185	0.113522	-2.82927	0.00466549	0.00869772
DST	1013.53	-2.66086	0.255815	-10.4015	2.44084e-25	2.93613e-24
DSTYK	722.285	-0.663589	0.105094	-6.31422	2.71536e-10	1.11058e-09
DTL	542.632	2.69672	0.157307	17.1431	7.08264e-66	4.8705e-64
DTX2	402.099	-1.24498	0.130111	-9.56856	1.08409e-21	1.04313e-20
DTX3L	712.693	0.405077	0.122136	3.31659	0.00091123	0.00188006
DTYMK	367.132	1.38471	0.179486	7.71485	1.21129e-14	7.1397e-14
DUS1L	1289.32	1.38897	0.2223	6.24819	4.15231e-10	1.66755e-09
DUS2	319.206	-0.0171214	0.250644	-0.0683095	0.945539	0.97052
DUS3L	956.726	-0.07912	0.193165	-0.409597	0.682101	0.754598
DUSP1	5154.57	1.16729	0.168302	6.93568	4.04275e-12	1.93553e-11
DUSP10	780.609	0.455086	0.0701054	6.49146	8.50063e-11	3.63759e-10
DUSP2	601.155	1.25186	0.219387	5.70615	1.15558e-08	4.08213e-08
DUSP22	485.264	-0.00448573	0.181469	-0.024719	0.980279	0.996804
DUSP3	599.614	-0.932497	0.160481	-5.81064	6.22347e-09	2.2584e-08
DUSP6	3421.53	0.744614	0.154554	4.81782	1.45132e-06	4.14118e-06
DUT	872.131	2.84244	0.188219	15.1018	1.5767e-51	6.50547e-50
DVL1	328.574	0.525635	0.245579	2.14039	0.0323233	0.0522185
DVL2	419.741	0.355021	0.145516	2.43973	0.0146983	0.0253363
DVL3	680.939	-0.584493	0.231143	-2.52871	0.0114484	0.0200919
DYM	628.083	-0.336906	0.136431	-2.46943	0.013533	0.0234827
DYNC1H1	7041.46	-0.586761	0.111005	-5.2859	1.2509e-07	3.97262e-07
DYNC1I2	608.377	0.573559	0.176994	3.24057	0.00119293	0.00242345
DYNC1LI1	438.885	0.0317325	0.0897491	0.353569	0.723662	0.791116
DYNC1LI2	1404.51	-0.881509	0.0921876	-9.56213	1.15359e-21	1.10846e-20
DYNLL1	534.413	1.94397	0.228716	8.49949	1.90426e-17	1.38718e-16
DYNLL2	445.209	1.06467	0.112035	9.503	2.03919e-21	1.93064e-20
DYNLT1	342.948	0.352651	0.135523	2.60215	0.00926417	0.0165243
DYRK1A	2822.69	-0.105116	0.131333	-0.800373	0.423495	0.510539
DYRK2	421.181	0.0587632	0.320976	0.183077	0.854738	0.898876
DYSF	1073.32	0.219119	0.231069	0.948284	0.342985	0.425918
E2F1	671.125	1.96427	0.229213	8.56963	1.0382e-17	7.68498e-17
E2F2	754.928	1.29384	0.227627	5.68402	1.31564e-08	4.62379e-08
E2F3	569.955	0.775725	0.130054	5.96462	2.45201e-09	9.20229e-09
E2F4	972.458	1.21483	0.137385	8.84256	9.35511e-19	7.43149e-18
E4F1	601.811	0.458636	0.239932	1.91153	0.0559367	0.0859891
EAF1	460.345	-0.481258	0.180161	-2.67127	0.00755648	0.0136626
EARS2	348.148	-0.442062	0.173894	-2.54214	0.0110178	0.0193955
EBNA1BP2	338.112	1.56051	0.14332	10.8882	1.31147e-27	1.77764e-26
EBPL	372.09	0.31414	0.461472	0.680735	0.496039	0.582496
ECD	451.134	-1.07855	0.201464	-5.35358	8.62289e-08	2.78519e-07
ECH1	418.234	1.33753	0.216732	6.17135	6.77098e-10	2.66677e-09
ECHDC1	333.154	0.614067	0.173943	3.53028	0.00041512	0.000895573
ECHDC2	309.779	-0.58824	0.145027	-4.05607	4.99061e-05	0.000120276
ECHS1	497.467	2.26551	0.205938	11.0009	3.78152e-28	5.26402e-27
ECI1	316.492	1.96466	0.258612	7.59695	3.03189e-14	1.73455e-13
ECT2	577.343	-1.46088	0.177243	-8.24223	1.69024e-16	1.14515e-15
EDC3	369.343	-0.0857381	0.254757	-0.336549	0.736457	0.802382
EDC4	1482.51	0.250917	0.162987	1.53949	0.123684	0.176142
EDEM1	1390.78	0.504808	0.164298	3.07252	0.00212261	0.00415539
EDEM2	519.164	1.23859	0.127088	9.74595	1.91982e-22	1.93482e-21
EDEM3	763.331	1.05229	0.22468	4.68352	2.81996e-06	7.79627e-06
EDF1	1002.73	1.88385	0.118316	15.9222	4.44197e-57	2.26826e-55
EDRF1	512.104	-0.463144	0.147445	-3.14113	0.00168296	0.00334969
EEA1	368.471	-0.0181942	0.245592	-0.074083	0.940944	0.967691
EEF1A1	78908.9	1.78174	0.173971	10.2416	1.29057e-24	1.48491e-23
EEF1A1P5	2499.25	0.85898	0.838475	1.02445	0.305621	0.386073
EEF1B2	4115.08	2.71731	0.238752	11.3813	5.18137e-30	7.93356e-29
EEF1D	3600.71	1.31331	0.100478	13.0707	4.8448e-39	1.17448e-37
EEF1G	14067.8	2.07383	0.127048	16.3231	6.75655e-60	3.92641e-58
EEF2	21493.9	1.65248	0.258142	6.40142	1.53939e-10	6.43127e-10
EEF2K	1237.7	0.683768	0.160041	4.27245	1.93337e-05	4.89272e-05
EFCAB11	534.441	-1.54294	0.208412	-7.40331	1.32826e-13	7.18838e-13
EFCAB14	762.37	0.282799	0.157085	1.8003	0.0718138	0.1077
EFCAB2	400.278	0.292171	0.194062	1.50556	0.132181	0.186838
EFCAB4B	847.471	0.523727	0.101426	5.16361	2.42227e-07	7.47516e-07
EFHC1	312.957	-0.928776	0.319116	-2.91046	0.00360892	0.00683046
EFHD2	1121.64	-0.135661	0.185646	-0.730752	0.46493	0.552316
EFR3A	619.743	-0.0695019	0.14927	-0.465612	0.641493	0.718849
EFTUD1	399.645	0.724846	0.229524	3.15804	0.00158835	0.00317424
EFTUD2	1871.29	0.080987	0.124137	0.6524	0.514143	0.599998
EGFL7	736.268	2.96059	0.189641	15.6116	6.07345e-55	2.86062e-53
EGFL8	452.075	-0.0789386	0.262389	-0.300845	0.763533	0.825089
EGLN1	698.406	1.4129	0.246434	5.73339	9.84429e-09	3.50212e-08
EGLN2	1195.51	0.204691	0.11201	1.82743	0.0676347	0.102104
EGR1	386.117	-0.31712	0.291876	-1.08649	0.277263	0.356094
EHBP1	363.213	-0.160846	0.150001	-1.0723	0.283585	0.36288
EHBP1L1	2794.32	-0.744433	0.247989	-3.00189	0.00268313	0.00518113
EHD1	685.617	-0.225657	0.179142	-1.25965	0.207795	0.277859
EHD4	328.875	0.185717	0.162879	1.14022	0.254195	0.330729
EHMT1	2486.99	-0.440753	0.109309	-4.03219	5.52586e-05	0.000132356
EHMT2	1888.86	0.464274	0.1203	3.8593	0.000113711	0.000262577
EI24	325.018	0.26788	0.202622	1.32207	0.186145	0.252593
EID1	821.181	1.8334	0.140767	13.0244	8.89382e-39	2.12607e-37
EIF1	1873.2	-0.425243	0.150363	-2.82811	0.00468233	0.00872596
EIF1AX	692.337	1.78136	0.126327	14.1012	3.73562e-45	1.17478e-43
EIF2A	687.171	0.8958	0.216369	4.14015	3.47076e-05	8.52809e-05
EIF2AK1	1693.24	0.458494	0.119871	3.82489	0.00013083	0.000300058
EIF2AK2	1064.27	-0.210571	0.110989	-1.89724	0.0577969	0.0885517
EIF2AK3	579.264	-0.563377	0.230195	-2.44739	0.0143897	0.0248542
EIF2AK4	1013.6	-0.454107	0.153523	-2.95791	0.00309735	0.00592914
EIF2B1	403.534	0.902078	0.286343	3.15034	0.00163079	0.0032515
EIF2B4	308.976	0.565286	0.164232	3.442	0.00057742	0.00122327
EIF2B5	740.038	0.197167	0.148727	1.3257	0.18494	0.251255
EIF2D	590.018	1.03506	0.139779	7.40502	1.31131e-13	7.10036e-13
EIF2S1	490.633	2.04603	0.222335	9.20245	3.49891e-20	3.04311e-19
EIF2S2	718.922	1.99303	0.129984	15.3329	4.61142e-53	2.00281e-51
EIF2S3	2180.13	1.14502	0.1492	7.67438	1.66221e-14	9.66226e-14
EIF3A	5350.93	0.87516	0.107149	8.16772	3.1427e-16	2.08402e-15
EIF3B	2969.52	1.44304	0.0884915	16.3071	8.78244e-60	5.08492e-58
EIF3C	4690.77	1.3375	0.140302	9.53297	1.52845e-21	1.45846e-20
EIF3CL	327.132	1.42934	2.3688	0.603401	0.546242	0.630502
EIF3D	2028.62	1.23882	0.102756	12.056	1.80342e-33	3.35176e-32
EIF3E	2115.98	1.44044	0.216296	6.65961	2.74556e-11	1.22335e-10
EIF3F	1535.16	1.69778	0.105071	16.1585	9.89896e-59	5.43126e-57
EIF3G	1266.48	0.659565	0.0824073	8.00371	1.20722e-15	7.66781e-15
EIF3H	1187.81	1.40455	0.129889	10.8135	2.97095e-27	3.94914e-26
EIF3I	916.029	1.82235	0.138859	13.1237	2.40889e-39	5.94442e-38
EIF3J	461.83	0.574632	0.294648	1.95023	0.0511489	0.0792016
EIF3K	1035.46	1.29025	0.0807602	15.9763	1.86807e-57	9.68298e-56
EIF3L	2938.68	1.94764	0.12267	15.877	9.14115e-57	4.62211e-55
EIF3M	1578.71	1.84712	0.197456	9.35459	8.39247e-21	7.60706e-20
EIF4A1	19650	-0.0450162	0.232651	-0.193492	0.846573	0.892109
EIF4A2	25768.8	-0.0500997	0.487317	-0.102807	0.918116	0.949886
EIF4A3	860.665	1.31824	0.123665	10.6598	1.56961e-26	2.00502e-25
EIF4B	5376.33	1.72241	0.120265	14.3218	1.59881e-46	5.33711e-45
EIF4E	907.634	0.720709	0.137964	5.22388	1.75208e-07	5.48322e-07
EIF4E2	416.923	0.31894	0.183734	1.73588	0.0825853	0.122351
EIF4EBP2	937.1	0.782475	0.121071	6.46292	1.027e-10	4.36035e-10
EIF4ENIF1	453.302	-0.193482	0.107377	-1.80189	0.0715629	0.107394
EIF4G1	4046.31	0.220095	0.141096	1.5599	0.118783	0.169894
EIF4G2	6277.56	-0.0345982	0.316933	-0.109166	0.913071	0.945805
EIF4G3	936.921	0.139255	0.151241	0.920749	0.357181	0.441104
EIF4H	2252.25	1.19632	0.117022	10.223	1.56367e-24	1.79015e-23
EIF5	2602.02	-0.262104	0.1721	-1.52298	0.127764	0.181314
EIF5A	1618.48	1.92396	0.0786041	24.4766	2.62095e-132	9.01169e-130
EIF5B	695.088	0.678308	0.16221	4.18166	2.89389e-05	7.17472e-05
EIF6	528.895	1.53003	0.124279	12.3113	7.87896e-35	1.55395e-33
ELAC2	929.704	0.420967	0.101911	4.13073	3.61616e-05	8.86318e-05
ELANE	4402.84	6.63332	0.330851	20.0493	2.04796e-89	2.67402e-87
ELAVL1	825.643	0.180795	0.135909	1.33027	0.183431	0.249533
ELF1	1683.85	-0.0579884	0.118298	-0.490187	0.624001	0.703451
ELF2	1142.46	-0.957411	0.154437	-6.19935	5.66977e-10	2.24505e-09
ELF4	899.391	-0.665946	0.1555	-4.28262	1.84709e-05	4.68357e-05
ELK4	772.496	-0.615215	0.3377	-1.82178	0.0684884	0.103215
ELL	617.81	-0.787259	0.23454	-3.35661	0.000789048	0.00164275
ELL2	406.902	-0.0509698	0.489102	-0.104211	0.917002	0.948972
ELMO1	2788.86	-0.823611	0.151439	-5.43857	5.37099e-08	1.76974e-07
ELMO2	468.824	0.115975	0.112152	1.03408	0.301099	0.381435
ELMOD3	421.456	-0.890069	0.286107	-3.11096	0.00186478	0.00368137
ELMSAN1	2345.36	-1.07646	0.10868	-9.90488	3.96463e-23	4.1539e-22
ELOVL1	371.47	0.940263	0.135352	6.94682	3.73612e-12	1.7933e-11
ELOVL5	1119.07	0.482807	0.129656	3.72375	0.000196282	0.000441292
ELP2	795.287	-0.0693297	0.108845	-0.636959	0.524151	0.609334
ELP3	369.787	0.688415	0.211908	3.24865	0.00115956	0.00235821
EMB	1786.94	1.99521	0.152122	13.1159	2.66952e-39	6.57186e-38
EMC1	1067.78	0.445411	0.159671	2.78956	0.00527801	0.00976561
EMC10	886.958	1.35227	0.172946	7.81901	5.32423e-15	3.21542e-14
EMC3	546.284	1.23891	0.206173	6.00909	1.8657e-09	7.08569e-09
EMC4	647.793	0.255375	0.100738	2.53506	0.0112429	0.0197632
EMD	332.125	0.214096	0.131295	1.63065	0.102964	0.149483
EME2	537.685	-0.548591	0.310793	-1.76513	0.0775413	0.115592
EMG1	323.907	1.80441	0.137052	13.1658	1.38048e-39	3.45205e-38
EMID1	724.483	0.44073	0.221072	1.99361	0.0461951	0.0722248
EMILIN1	708.369	3.01489	0.260857	11.5576	6.7545e-31	1.0802e-29
EMILIN2	1739.33	0.106649	0.238676	0.446836	0.654993	0.730959
EML2	261704	0.665219	0.389975	1.7058	0.0880455	0.129704
EML3	1183.31	-0.526572	0.123163	-4.27542	1.90778e-05	4.82975e-05
EML4	625.467	-0.749798	0.0939286	-7.98263	1.43246e-15	9.03171e-15
EMP1	321.461	-1.86718	0.156854	-11.904	1.12857e-32	1.99165e-31
EMP2	328.529	-2.43697	0.157418	-15.4809	4.6712e-54	2.09493e-52
EMP3	823.96	-1.28122	0.186549	-6.86803	6.50958e-12	3.05836e-11
EMR2	1972.44	-1.40021	0.108028	-12.9616	2.02115e-38	4.74901e-37
ENAH	309.494	-2.41773	0.443757	-5.44831	5.08508e-08	1.68036e-07
ENG	546.915	-1.59154	0.183759	-8.66104	4.67498e-18	3.52761e-17
ENGASE	2046.34	-0.131238	0.182453	-0.7193	0.471956	0.559245
ENO1	8434.99	2.21162	0.0798269	27.7052	6.04312e-169	4.61739e-166
ENOSF1	1627.47	0.582378	0.11153	5.2217	1.7729e-07	5.54335e-07
ENSA	1441.16	1.21206	0.129413	9.36582	7.546e-21	6.85486e-20
ENTHD2	705.426	-0.567248	0.313934	-1.8069	0.0707776	0.106324
ENTPD1	877.313	-1.25659	0.208497	-6.0269	1.67136e-09	6.36636e-09
ENTPD4	957.161	-1.1271	0.135649	-8.30889	9.65989e-17	6.66723e-16
ENTPD6	729.51	0.232765	0.15025	1.54919	0.121337	0.173195
ENY2	447.099	1.36046	0.29608	4.59491	4.32933e-06	1.17472e-05
EOGT	314.442	0.43209	0.121166	3.5661	0.00036233	0.000787657
EP300	2308.84	-1.32376	0.168206	-7.86987	3.55023e-15	2.1772e-14
EP400	2026.63	-0.955301	0.174412	-5.47728	4.31916e-08	1.43786e-07
EP400NL	324.859	-0.191298	0.176973	-1.08094	0.279723	0.358672
EPB41	2574.87	0.500909	0.164772	3.04	0.00236576	0.00459966
EPB42	743.309	2.73566	0.188779	14.4913	1.37418e-47	4.77263e-46
EPC1	975.058	-0.380205	0.182456	-2.08382	0.0371766	0.0593479
EPC2	372.678	0.0513371	0.198699	0.258366	0.796125	0.850987
EPG5	1802.69	-0.379409	0.0899374	-4.21859	2.45832e-05	6.14502e-05
EPHB4	300.069	-0.174165	0.201206	-0.865609	0.386705	0.472194
EPHB6	1163.8	1.14832	0.159845	7.18396	6.77223e-13	3.46936e-12
EPM2AIP1	720.807	0.450262	0.111878	4.02457	5.70787e-05	0.000136526
EPN1	484.756	-0.466904	0.230106	-2.02908	0.0424499	0.0668659
EPRS	1123.01	1.93485	0.22682	8.53031	1.4595e-17	1.06923e-16
EPS15	1696.93	-0.283493	0.197659	-1.43426	0.151499	0.210765
EPS15L1	812.551	-0.88331	0.171174	-5.1603	2.46554e-07	7.60301e-07
EPT1	414.936	0.466196	0.145025	3.21459	0.0013063	0.00264051
EPX	3141.63	4.26152	0.232418	18.3356	4.3005e-75	3.92564e-73
ERAP1	940.464	0.407213	0.251179	1.62121	0.104973	0.152164
ERAP2	361.778	-1.08254	0.246968	-4.38332	1.16886e-05	3.02972e-05
ERBB2IP	1330.5	-0.490682	0.254407	-1.92873	0.0537646	0.0829033
ERC1	1424.17	-1.90402	0.184624	-10.313	6.15725e-25	7.22138e-24
ERCC1	1061.24	0.944505	0.13717	6.88567	5.75159e-12	2.71647e-11
ERCC2	369.751	1.68458	0.18297	9.20686	3.35806e-20	2.92431e-19
ERCC3	853.947	0.459527	0.158725	2.89512	0.00379018	0.00715317
ERCC4	382.946	-1.15237	0.281779	-4.08961	4.32095e-05	0.000104959
ERCC5	948.388	0.114153	0.120653	0.946125	0.344085	0.427027
ERCC6L2	668.029	0.556167	0.177393	3.13522	0.00171723	0.00341
EREG	1805.68	-0.717408	0.104739	-6.8495	7.41093e-12	3.46605e-11
ERF	423.362	-0.199216	0.223283	-0.892213	0.372279	0.456878
ERG	1097.22	0.299207	0.118598	2.52288	0.0116399	0.0204087
ERGIC1	1244.7	0.925211	0.185861	4.97796	6.42572e-07	1.897e-06
ERGIC2	391.17	1.49076	0.236371	6.30685	2.84767e-10	1.16309e-09
ERGIC3	1278.77	1.37404	0.110822	12.3987	2.65747e-35	5.3591e-34
ERH	438.378	2.2946	0.292858	7.83522	4.68037e-15	2.83821e-14
ERI1	337.992	-0.118518	0.165625	-0.715579	0.474252	0.561352
ERICH1	667.388	-0.454707	0.0901485	-5.04398	4.55957e-07	1.3696e-06
ERLEC1	313.637	0.271468	0.225635	1.20313	0.228926	0.301754
ERLIN1	1256.84	2.67751	0.1455	18.4022	1.26242e-75	1.17845e-73
ERLIN2	595.986	1.49938	0.104038	14.4118	4.36339e-47	1.48054e-45
ERMAP	652.346	0.770112	0.145164	5.30511	1.12607e-07	3.5911e-07
ERMARD	397.895	0.079611	0.208022	0.382705	0.701939	0.772128
ERMP1	556.272	1.78954	0.164609	10.8714	1.57684e-27	2.13034e-26
ERN1	491.028	-1.68126	0.148293	-11.3374	8.56258e-30	1.29887e-28
ERO1L	895.663	-0.321245	0.184672	-1.73954	0.0819392	0.121455
ERO1LB	664.506	-1.34634	0.189628	-7.09989	1.24859e-12	6.22784e-12
ERP29	1315.31	1.59424	0.130255	12.2394	1.91412e-34	3.7183e-33
ERP44	388.242	1.00995	0.111635	9.04688	1.47106e-19	1.23015e-18
ERV3-1	564.518	-0.630263	0.173188	-3.63918	0.000273503	0.000604408
ESCO1	530.261	-0.409257	0.178503	-2.29272	0.0218644	0.0364848
ESCO2	350.596	0.712049	0.161897	4.39816	1.09174e-05	2.83803e-05
ESD	455.67	1.94156	0.111974	17.3395	2.36944e-67	1.75833e-65
ESPL1	929.112	0.717747	0.154688	4.63996	3.48482e-06	9.55374e-06
ESRRA	376.622	0.533293	0.21871	2.43836	0.0147542	0.0254242
ESYT1	2886.1	0.940686	0.117917	7.9775	1.49324e-15	9.40341e-15
ESYT2	3439.06	0.666471	0.138685	4.80564	1.54256e-06	4.38816e-06
ETF1	1128.31	0.498381	0.0870834	5.72303	1.04638e-08	3.70654e-08
ETFA	642.58	1.34196	0.152631	8.79219	1.46668e-18	1.14873e-17
ETFB	659.125	1.09492	0.121907	8.98159	2.66882e-19	2.18917e-18
ETFDH	310.342	0.167541	0.154502	1.0844	0.278188	0.357038
ETHE1	448.617	1.92325	0.204532	9.40319	5.29336e-21	4.85558e-20
ETNK1	687.636	0.326577	0.223374	1.46202	0.143735	0.201198
ETS1	826.711	-1.90584	0.11828	-16.1129	2.07003e-58	1.11793e-56
ETS2	2107.07	0.146262	0.129936	1.12564	0.260316	0.337522
ETV3	458.784	-0.678519	0.1183	-5.7356	9.71674e-09	3.45853e-08
ETV6	3560.79	-0.589283	0.1544	-3.81661	0.0001353	0.000309862
EVI2A	434.896	0.148842	0.140249	1.06127	0.288566	0.368021
EVI2B	384.01	-0.589158	0.294486	-2.00063	0.0454322	0.0711451
EVL	1066	-0.875993	0.108378	-8.08273	6.33353e-16	4.0998e-15
EVPL	478.095	0.860178	0.200653	4.2869	1.81182e-05	4.59885e-05
EWSR1	4099.94	0.834089	0.118033	7.0666	1.58776e-12	7.86444e-12
EXD3	334.174	-0.160471	0.254452	-0.630653	0.528267	0.613324
EXOC1	518.57	0.0868038	0.183656	0.472643	0.636468	0.714342
EXOC2	359.066	0.528148	0.180015	2.93391	0.00334716	0.00636658
EXOC3	1244.71	-0.237761	0.0850292	-2.79623	0.00517026	0.00957989
EXOC4	1726.65	-0.506393	0.143415	-3.53097	0.000414045	0.000893396
EXOC5	566.133	0.633718	0.211717	2.99324	0.00276037	0.00531811
EXOC6	391.486	0.690146	0.223271	3.09107	0.00199438	0.00392184
EXOC7	1916.94	0.668162	0.0928285	7.19781	6.11859e-13	3.14465e-12
EXOC8	457.197	0.302179	0.154953	1.95014	0.0511593	0.0792117
EXOSC10	1106.3	-0.354494	0.103522	-3.42432	0.000616338	0.00130091
EXOSC2	895.412	0.853424	0.12586	6.78072	1.19582e-11	5.48583e-11
EXOSC6	1144.58	0.511984	0.393171	1.30219	0.192851	0.260493
EXOSC7	445.257	0.836116	0.162769	5.13683	2.79414e-07	8.57146e-07
EXOSC8	387.028	1.11199	0.193968	5.73284	9.87605e-09	3.51202e-08
EXOSC9	333.946	1.35397	0.191879	7.05638	1.709e-12	8.43257e-12
EXT2	611.985	0.985035	0.145989	6.74733	1.50596e-11	6.84918e-11
EXTL3	664.088	-2.33524	0.194642	-11.9976	3.65716e-33	6.6532e-32
EYA3	432.101	-0.148311	0.133829	-1.10822	0.267768	0.345685
EZH1	894.52	-1.26819	0.111514	-11.3725	5.73085e-30	8.75111e-29
EZH2	1041.44	0.375551	0.131364	2.85885	0.00425177	0.0079769
EZR	1837.97	-0.76766	0.209673	-3.66122	0.000251019	0.000557249
F11R	1162.43	0.877921	0.129928	6.75698	1.40899e-11	6.42515e-11
F13A1	1540.89	0.0772594	0.227847	0.339085	0.734546	0.800681
FADS1	678.084	-1.20847	0.196552	-6.14832	7.83094e-10	3.06609e-09
FADS2	1051	-0.417252	0.142582	-2.9264	0.00342904	0.00650827
FADS3	317.271	-0.637949	0.217844	-2.92847	0.00340633	0.00647017
FAF1	744.272	1.127	0.154619	7.2889	3.12499e-13	1.64419e-12
FAF2	398.913	0.506141	0.135783	3.72757	0.000193335	0.000434903
FAH	499.878	3.12291	0.113489	27.5173	1.08925e-166	7.74867e-164
FAM101B	2110.6	2.33678	0.117376	19.9084	3.44177e-88	4.22641e-86
FAM102B	494.769	-0.30269	0.149722	-2.02169	0.0432087	0.0679677
FAM104A	437.321	1.10069	0.143938	7.647	2.05728e-14	1.18817e-13
FAM105A	558.291	0.689935	0.212537	3.24619	0.00116962	0.00237774
FAM105B	730.863	-0.255566	0.202109	-1.2645	0.206052	0.27585
FAM107B	888.38	0.172847	0.175576	0.984458	0.324891	0.406877
FAM111A	1178.9	1.09451	0.140826	7.77202	7.72414e-15	4.60813e-14
FAM115A	520.257	1.65151	0.205985	8.01764	1.07799e-15	6.87022e-15
FAM117A	832.749	-0.498276	0.110163	-4.52309	6.09421e-06	1.6296e-05
FAM117B	472.988	-0.674869	0.197206	-3.42215	0.000621279	0.00131067
FAM118A	529.03	-1.14885	0.152217	-7.54747	4.43811e-14	2.50167e-13
FAM120A	1863.26	0.603837	0.0951926	6.34332	2.24871e-10	9.27261e-10
FAM120AOS	311.153	0.598867	0.17329	3.45586	0.000548538	0.00116579
FAM120B	461.927	-0.464363	0.119566	-3.88375	0.000102858	0.000238853
FAM122B	418.053	0.237893	0.297686	0.799139	0.42421	0.511212
FAM122C	1161.65	-1.96867	0.160287	-12.2822	1.12912e-34	2.20794e-33
FAM126B	609.251	-0.961393	0.181739	-5.28997	1.22337e-07	3.88936e-07
FAM129A	1246	-0.32961	0.113576	-2.9021	0.00370671	0.00700655
FAM129B	434.35	-0.926943	0.217222	-4.26727	1.97883e-05	4.99918e-05
FAM129C	597.974	-0.443659	0.195582	-2.26841	0.0233044	0.0386627
FAM133B	564.974	-0.690664	0.235752	-2.92962	0.00339373	0.00644744
FAM134A	1123.44	0.777841	0.148741	5.22951	1.69957e-07	5.32294e-07
FAM134C	715.803	0.450162	0.162879	2.76378	0.00571369	0.0105227
FAM135A	664.348	-0.31427	0.282246	-1.11346	0.265511	0.343266
FAM136A	321.13	1.32363	0.130411	10.1497	3.32463e-24	3.71344e-23
FAM13A	415.083	-0.984197	0.183483	-5.36397	8.14128e-08	2.64163e-07
FAM13B	971.094	-0.826978	0.169922	-4.8668	1.13417e-06	3.26924e-06
FAM149B1	368.428	0.594418	0.691548	0.859547
FAM156B	485.232	0.104459	0.316316	0.330235	0.741222	0.806339
FAM160A2	517.573	-0.488018	0.149118	-3.27268	0.00106531	0.00217901
FAM160B1	760.657	0.219531	0.270162	0.812592	0.416452	0.503275
FAM160B2	768.543	-1.21994	0.162264	-7.51823	5.55213e-14	3.09234e-13
FAM168A	434.615	0.3236	0.180614	1.79167	0.0731861	0.109606
FAM168B	695.323	1.33576	0.146635	9.10947	8.27818e-20	7.03083e-19
FAM177A1	723.025	-1.07966	0.13519	-7.98622	1.39137e-15	8.78601e-15
FAM178A	604.209	0.568068	0.187953	3.02239	0.0025079	0.00485757
FAM179A	563.831	-1.90868	0.160056	-11.925	8.76486e-33	1.55879e-31
FAM179B	715.238	-1.08673	0.15623	-6.95594	3.50219e-12	1.68533e-11
[truncated: 5,194 more rows]

## Sheet: UD10
symbol	baseMean	log2FoldChange	lfcSE	stat	pvalue	padj
CLC	1198.76	6.73366	0.147135	45.7653	0	0
CTSG	718.768	7.90886	0.193857	40.7975	0	0
HBB	105441	11.1223	0.239367	46.4654	0	0
MS4A3	619.202	6.59781	0.167029	39.5009	0	0
PCNA	1257.01	3.56636	0.0684218	52.1231	0	0
PRG2	5907.84	6.22547	0.158842	39.1929	0	0
ADA	870.891	3.11621	0.085644	36.3856	7.17976e-290	1.76858e-286
SSRP1	1208.05	2.27832	0.0677672	33.6199	8.59976e-248	1.85357e-244
DEFA3	773.902	7.22117	0.215741	33.4714	1.25506e-245	2.40455e-242
MLC1	1866.35	4.19613	0.129953	32.2896	9.79763e-229	1.68941e-225
GYPC	1539.93	3.39002	0.105959	31.9937	1.3359e-224	2.09408e-221
RNASE2	2640.85	3.43377	0.107656	31.8958	3.04979e-223	4.3823e-220
TUBA1B	7487.87	3.2758	0.103469	31.6596	5.59109e-220	7.41594e-217
CYTH1	1746.56	-2.02541	0.0647229	-31.2936	5.70136e-215	7.02204e-212
PDIA6	2041	2.54871	0.0818117	31.1534	4.56598e-213	5.24875e-210
HBA1	19524.2	10.0252	0.323174	31.0212	2.79348e-211	3.0105e-208
MCM3	2232.96	2.97861	0.097679	30.4938	3.14504e-204	3.19e-201
C19orf77	307.484	6.16659	0.206828	29.8151	2.49224e-195	2.38743e-192
LTF	1559.73	7.27081	0.245714	29.5905	1.97826e-192	1.70556e-189
CDCA7	691.915	3.40086	0.115175	29.5279	1.26302e-191	1.03706e-188
PNP	1988.5	2.18766	0.0753153	29.0467	1.69242e-185	1.32647e-182
CD300E	388.467	-3.84215	0.134453	-28.5762	1.32648e-179	9.94453e-177
APMAP	691.831	2.25537	0.079208	28.474	2.46259e-178	1.76926e-175
DEFA1	1943.95	7.53149	0.271139	27.7772	8.17336e-170	5.63733e-167
ENO1	8434.99	2.21162	0.0798269	27.7052	6.04312e-169	3.85932e-166
RP11-424C20.2	1662.84	4.11766	0.148623	27.7054	6.01632e-169	3.85932e-166
UBB	6097.59	2.21777	0.0801273	27.6781	1.28222e-168	7.89621e-166
FAH	499.878	3.12291	0.113489	27.5173	1.08925e-166	6.47651e-164
ALDH18A1	719.166	2.96132	0.108077	27.4	2.73937e-165	1.5745e-162
MPO	43120.3	3.79751	0.1389	27.3398	1.42756e-164	7.94045e-162
RETN	422.132	4.65718	0.17071	27.2812	7.08453e-164	3.81745e-161
NFKB2	588.319	-3.27946	0.120768	-27.1551	2.2032e-162	1.1512e-159
C1QBP	984.139	3.05031	0.113673	26.8341	1.29336e-158	6.37185e-156
CCNF	442.47	3.33359	0.126152	26.4251	7.05291e-154	3.37815e-151
APEX1	1360.44	2.53875	0.0962624	26.3732	2.77944e-153	1.29529e-150
UNG	527.011	3.98976	0.152761	26.1176	2.30087e-150	1.04405e-147
VAMP8	1273.25	2.07187	0.0797007	25.9956	5.55047e-149	2.45402e-146
HIST1H2BM	433.568	3.50711	0.135541	25.8749	1.27607e-147	5.5008e-145
MAD2L1	345.816	3.56745	0.13909	25.6485	4.39185e-145	1.84704e-142
RNASE3	379.501	4.46569	0.174271	25.625	8.03479e-145	3.29866e-142
IDH2	2230.17	2.79672	0.109845	25.4605	5.40411e-143	2.16705e-140
MCM2	2267.43	3.50854	0.137914	25.44	9.10253e-143	3.56716e-140
FKBP5	2270.85	2.35219	0.09334	25.2002	3.98415e-140	1.49345e-137
PTDSS1	1212.42	2.34245	0.0931378	25.1504	1.39869e-139	5.1314e-137
AHNAK	26559.8	-2.3232	0.0924585	-25.127	2.52333e-139	9.06453e-137
CCNA1	371.858	2.48531	0.0991594	25.0637	1.23651e-138	4.35127e-136
ITM2A	1109.02	4.25455	0.170667	24.929	3.61153e-137	1.22105e-134
TMCC2	896.882	5.03149	0.20203	24.9046	6.62873e-137	2.19806e-134
MCM7	4527.06	2.18465	0.08842	24.7077	8.84693e-135	2.87826e-132
CPA3	614.807	3.32616	0.134683	24.6962	1.17508e-134	3.75222e-132
NCAPH	423.816	3.07481	0.124607	24.6761	1.93321e-134	6.06079e-132
CD69	956.303	3.21805	0.130722	24.6175	8.20759e-134	2.52721e-131
SHMT2	766.184	2.50038	0.101714	24.5826	1.93945e-133	5.76586e-131
EIF5A	1618.48	1.92396	0.0786041	24.4766	2.62095e-132	7.53217e-130
NPIPB3	2745.05	-2.35909	0.0965904	-24.4236	9.60077e-132	2.71387e-129
HIST1H1B	5181.1	3.32322	0.137025	24.2526	6.20653e-130	1.72612e-127
SPRY2	351.95	2.84603	0.11765	24.1907	2.78544e-129	7.62371e-127
HIST1H2BO	1052.93	3.19505	0.134469	23.7605	8.56475e-125	2.27203e-122
CD83	610.362	-2.77481	0.117776	-23.56	9.91483e-123	2.51414e-120
HIST1H2BH	1527.36	3.33752	0.142497	23.4216	2.57328e-121	6.24945e-119
SLC4A1	8773.61	5.65585	0.241598	23.4102	3.36338e-121	8.05484e-119
HIST1H2BJ	1098.13	3.06256	0.131635	23.2656	9.89856e-120	2.3065e-117
TMED3	364.928	2.58346	0.111616	23.1459	1.59853e-118	3.62677e-116
MLEC	2128.88	2.14591	0.0930834	23.0536	1.35219e-117	2.9892e-115
CA2	668.619	4.60681	0.2002	23.0111	3.61298e-117	7.8859e-115
TPX2	937.069	3.0854	0.13482	22.8853	6.50422e-116	1.4019e-113
NPIPB4	1032.77	-2.79911	0.122437	-22.8617	1.11707e-115	2.37798e-113
MCM10	466.913	2.62772	0.115142	22.8217	2.79479e-115	5.87689e-113
SMG1	5951.85	-1.96374	0.0863804	-22.7336	2.08465e-114	4.3308e-112
ASPM	1593.39	2.83527	0.124737	22.7299	2.27002e-114	4.65976e-112
ORC1	608.938	2.51848	0.111071	22.6745	7.99656e-114	1.62217e-111
HIST1H2AH	1266.29	3.40948	0.15043	22.6648	9.95946e-114	1.99687e-111
SNX29	1400.49	-2.33053	0.103255	-22.5706	8.43802e-113	1.67238e-110
ITM2C	1195.07	2.38458	0.105696	22.5607	1.05332e-112	2.0639e-110
CA1	3200.58	4.80909	0.213388	22.5368	1.80835e-112	3.46459e-110
MZB1	1131.61	3.33287	0.149821	22.2457	1.24184e-109	2.3275e-107
SLC40A1	1187.71	4.17464	0.187867	22.2212	2.14119e-109	3.96994e-107
ZWINT	580.722	3.1833	0.143916	22.1192	2.06659e-108	3.71189e-106
CAT	3718.89	1.96229	0.0887565	22.1087	2.60601e-108	4.63252e-106
IMPDH2	1491.79	2.94331	0.133136	22.1075	2.67409e-108	4.70503e-106
UCK2	688.835	2.48831	0.113148	21.9916	3.46426e-107	6.03376e-105
CCT4	1087.67	2.34574	0.10724	21.8738	4.61852e-106	7.88487e-104
RPL7A	10588.6	2.28662	0.104665	21.847	8.30153e-106	1.37638e-103
HIST1H2BL	1108.48	3.68482	0.169897	21.6885	2.6351e-104	4.28652e-102
PDIA4	1343.6	2.73815	0.126911	21.5753	3.06265e-103	4.88974e-101
HIST1H2AJ	1542.91	3.94393	0.183159	21.5328	7.67594e-103	1.21428e-100
SMC2	851.604	2.47733	0.115119	21.5196	1.01951e-102	1.59813e-100
HSPA8	6754.67	2.75663	0.128197	21.5031	1.45755e-102	2.26419e-100
FEN1	680.317	3.59014	0.167554	21.4267	7.52634e-102	1.15872e-99
PRTN3	11140.1	7.61246	0.35604	21.3809	2.01166e-101	3.06965e-99
FMNL1	2598.65	-2.02249	0.0946061	-21.378	2.14283e-101	3.24112e-99
RRP1B	644.241	2.10465	0.0986095	21.3433	4.49864e-101	6.62991e-99
TMEM230	388.759	1.73391	0.0816236	21.2428	3.84102e-100	5.61277e-98
TCF19	433.6	3.22468	0.152159	21.1928	1.11322e-99	1.61304e-97
CDK4	821.52	2.84578	0.1344	21.174	1.6601e-99	2.38543e-97
STMN1	2464.12	3.25781	0.153987	21.1563	2.41265e-99	3.40994e-97
CST7	685.876	4.98566	0.235692	21.1533	2.574e-99	3.60842e-97
NOLC1	1000.14	2.24256	0.106047	21.1469	2.94677e-99	4.09767e-97
ZEB2	3768.16	-1.75636	0.0831466	-21.1236	4.82269e-99	6.65261e-97
KRT18	307.386	3.19284	0.15151	21.0735	1.39246e-98	1.90556e-96
TUBB	6109.38	2.93841	0.139695	21.0344	3.1768e-98	4.3132e-96
TMPO	3229.42	1.97233	0.0940967	20.9606	1.50057e-97	2.02144e-95
CCT7	1271.92	2.1704	0.10377	20.9155	3.86778e-97	5.16994e-95
TUFM	1194.92	2.03391	0.0973722	20.888	6.8894e-97	9.13799e-95
GFI1	1091.91	3.4566	0.166055	20.816	3.09899e-96	4.07908e-94
CPXM1	1909.1	2.56835	0.123505	20.7955	4.75044e-96	6.20544e-94
UROD	1014.22	2.53711	0.12223	20.7568	1.06393e-95	1.37935e-93
ALOX5AP	339.786	2.04846	0.0987014	20.7541	1.12655e-95	1.44963e-93
SAE1	693.113	2.04421	0.098565	20.7397	1.51982e-95	1.94121e-93
HBG2	4799.11	4.89804	0.237346	20.6367	1.28569e-94	1.63008e-92
PHB	634.773	2.91985	0.141609	20.6191	1.85128e-94	2.33004e-92
HIST1H2BD	2508.75	2.70007	0.131003	20.6107	2.19982e-94	2.74866e-92
PRPF6	1754.98	1.25102	0.0609986	20.5089	1.7918e-93	2.22273e-91
RNF213	8333.41	-1.78966	0.0874854	-20.4566	5.24225e-93	6.45658e-91
ATP5G2	1544.02	2.0213	0.098849	20.4484	6.21234e-93	7.59712e-91
SNRNP40	528.791	1.77811	0.0873287	20.3611	3.70002e-92	4.43052e-90
HIST1H2BC	2077.08	2.75504	0.135425	20.3436	5.28515e-92	6.28496e-90
ARID5B	454.156	-2.93129	0.144904	-20.2292	5.41596e-91	6.35288e-89
CSE1L	687.84	2.3611	0.116721	20.2285	5.49338e-91	6.40016e-89
HIST1H4H	1340.66	3.24427	0.160553	20.2069	8.50937e-91	9.78181e-89
RPSA	7205.57	2.38175	0.118071	20.1722	1.71784e-90	1.96164e-88
HSP90AB1	5160.53	2.31844	0.114953	20.1685	1.85162e-90	2.10049e-88
ODF2	1260.54	1.30533	0.0647798	20.1503	2.67612e-90	3.01597e-88
SF3B5	477.732	2.32372	0.115359	20.1434	3.0776e-90	3.44591e-88
HIST1H3C	1203.58	3.58958	0.178498	20.1099	6.0467e-90	6.72667e-88
H2AFY	9558.04	1.11357	0.0554243	20.0917	8.7208e-90	9.63928e-88
ELANE	4402.84	6.63332	0.330851	20.0493	2.04796e-89	2.235e-87
AAED1	564.274	-2.47717	0.123605	-20.041	2.41669e-89	2.62082e-87
UXT	431.829	2.09839	0.104709	20.0402	2.45595e-89	2.64674e-87
CDCA7L	1308.52	2.2711	0.113427	20.0227	3.49485e-89	3.74296e-87
HEMGN	1616.5	6.06999	0.303306	20.0128	4.26125e-89	4.5356e-87
TXLNA	1146.41	1.67808	0.0839326	19.9931	6.32145e-89	6.68717e-87
PRSS57	1816.56	5.19873	0.260374	19.9664	1.07997e-88	1.1286e-86
PRDX2	1363.87	3.13402	0.157373	19.9146	3.03887e-88	3.13768e-86
FAM101B	2110.6	2.33678	0.117376	19.9084	3.44177e-88	3.53253e-86
C21orf33	919.205	1.26321	0.0635037	19.8919	4.78424e-88	4.88134e-86
DDC8	317.709	-4.56362	0.229431	-19.891	4.86699e-88	4.93656e-86
PTPN7	1845.05	1.60578	0.0812118	19.7727	5.11229e-87	5.15504e-85
HIST1H2BI	1063.36	3.31288	0.167741	19.75	8.02861e-87	8.04868e-85
LSMD1	368.845	2.8576	0.144831	19.7306	1.17838e-86	1.1745e-84
MAFB	320.903	-3.12005	0.158505	-19.6842	2.94587e-86	2.91929e-84
PRX	438.272	4.68559	0.238387	19.6554	5.19771e-86	5.12138e-84
BZW2	536.193	2.29119	0.116736	19.6271	9.07913e-86	8.89497e-84
AREG	818.79	4.25101	0.217436	19.5506	4.0742e-85	3.94671e-83
CD34	467.183	3.11498	0.159437	19.5374	5.27737e-85	5.08367e-83
CCNA2	479.755	3.87362	0.198369	19.5274	6.42376e-85	6.15361e-83
SERBP1	2486.81	1.84353	0.0946757	19.4721	1.89524e-84	1.80551e-82
LAIR1	1587.08	1.93578	0.0996482	19.4262	4.63819e-84	4.39431e-82
STOM	1658.11	2.64274	0.136745	19.3261	3.24228e-83	3.03841e-81
C11orf31	573.405	2.11609	0.109703	19.2893	6.60495e-83	6.15617e-81
NLRP1	2055.66	-1.98731	0.10308	-19.2793	8.01616e-83	7.43133e-81
HIST1H4L	534.32	4.28077	0.222297	19.2569	1.23457e-82	1.13232e-80
RPS3	9707.22	2.64834	0.137726	19.2291	2.11306e-82	1.9278e-80
CANX	4867.05	1.33666	0.0698674	19.1314	1.38277e-81	1.2549e-79
SERPINB1	3374.84	2.15521	0.112718	19.1204	1.70765e-81	1.54162e-79
TOMM6	348.291	2.23909	0.117197	19.1054	2.27465e-81	2.03222e-79
SOD1	581.104	1.93451	0.101634	19.0341	8.9092e-81	7.87802e-79
CSTF2T	388.505	1.81981	0.0956657	19.0226	1.10868e-80	9.75359e-79
GPI	2531.06	2.27929	0.120116	18.9757	2.70849e-80	2.35872e-78
WDR5	646.067	2.00633	0.105757	18.9712	2.95349e-80	2.55915e-78
ARHGAP26	1588.6	-3.22414	0.170241	-18.9386	5.48117e-80	4.72559e-78
PTTG1	322.209	3.52642	0.186394	18.9192	7.92803e-80	6.80115e-78
IGLL1	531.147	6.12232	0.324451	18.8698	2.02192e-79	1.72594e-77
AHCY	820.743	2.90458	0.154004	18.8604	2.41267e-79	2.04934e-77
SPRY1	354.401	4.33299	0.229908	18.8466	3.13118e-79	2.64661e-77
SNRPC	328.496	2.36938	0.125841	18.8284	4.41839e-79	3.7164e-77
KIFC1	487.067	2.72635	0.144896	18.8159	5.5968e-79	4.66211e-77
NME1-NME2	1472.69	2.5046	0.133257	18.7953	8.25754e-79	6.84542e-77
NDUFB9	480.662	2.3971	0.127826	18.7528	1.83567e-78	1.51447e-76
AC091390.2	462.908	-2.81128	0.150012	-18.7404	2.31718e-78	1.90262e-76
NUCB2	1753.82	2.88209	0.154272	18.6819	6.94394e-78	5.67462e-76
MRPS16	580.843	2.03455	0.109005	18.6648	9.57408e-78	7.78707e-76
ATP5A1	3238.15	2.02317	0.108716	18.6097	2.68195e-77	2.16097e-75
MYC	1210.11	3.62959	0.1962	18.4995	2.08466e-76	1.67189e-74
RP11-274B21.1	1823.64	-1.62752	0.0880769	-18.4784	3.08403e-76	2.46194e-74
ABCF2	602.393	1.79501	0.097276	18.4527	4.95917e-76	3.92252e-74
GSR	895.922	1.80479	0.0979794	18.4201	9.06962e-76	7.14098e-74
HDGF	2689.12	2.04876	0.111303	18.4071	1.15215e-75	9.03025e-74
ERLIN1	1256.84	2.67751	0.1455	18.4022	1.26242e-75	9.84974e-74
H2AFZ	1492.88	3.1965	0.173791	18.3928	1.50034e-75	1.16533e-73
HIST1H2BG	1476.29	2.5022	0.136163	18.3765	2.02497e-75	1.55878e-73
TSC22D1	1259.66	2.02059	0.110028	18.3644	2.534e-75	1.94194e-73
EPX	3141.63	4.26152	0.232418	18.3356	4.3005e-75	3.28113e-73
RPS5	4416.25	2.73067	0.148938	18.3342	4.41158e-75	3.35105e-73
HIST1H4F	1142.93	2.98507	0.163272	18.2828	1.13539e-74	8.54916e-73
HDAC1	903.964	1.53683	0.0841194	18.2696	1.44518e-74	1.08345e-72
TSN	529.24	1.89926	0.104057	18.252	1.99341e-74	1.48798e-72
PLEKHM1P	2708.53	-1.53905	0.0843679	-18.2421	2.38936e-74	1.77585e-72
RACGAP1	475.356	2.77503	0.152208	18.2318	2.88916e-74	2.13811e-72
UNC119B	418.394	1.63884	0.0901591	18.1772	7.81693e-74	5.76014e-72
RP11-252A24.2	1005.31	-1.97699	0.109	-18.1375	1.61159e-73	1.18249e-71
PSMA5	498.712	1.8604	0.102927	18.075	5.01111e-73	3.66129e-71
ALAS1	400.19	2.46126	0.136235	18.0663	5.86954e-73	4.2704e-71
TOR1AIP1	938.656	1.11034	0.061714	17.9917	2.26351e-72	1.63991e-70
IFT57	412.991	1.64825	0.0916738	17.9796	2.81751e-72	2.03273e-70
TIMELESS	1185.93	1.92036	0.106883	17.967	3.53289e-72	2.53823e-70
HIST1H2BE	1059.64	3.39725	0.18924	17.9521	4.62345e-72	3.30797e-70
PLIN3	940.871	1.56523	0.0872763	17.9342	6.38147e-72	4.54693e-70
HIVEP1	644.179	-2.58292	0.144226	-17.9088	1.00622e-71	7.14e-70
FYN	841.999	-1.91591	0.107017	-17.9029	1.11998e-71	7.91465e-70
PPIH	358.927	2.25585	0.126044	17.8973	1.23781e-71	8.67622e-70
SLC25A5	1092.02	2.05442	0.114997	17.8649	2.21251e-71	1.54454e-69
CDC20	307.988	4.001	0.224029	17.8593	2.44638e-71	1.70093e-69
CALR	8812.98	2.27593	0.127815	17.8065	6.29772e-71	4.36111e-69
STOML2	487.069	2.18235	0.122629	17.7963	7.54789e-71	5.20593e-69
RPL29	4002.21	2.29911	0.129221	17.7921	8.13463e-71	5.58827e-69
P2RY8	1739.08	1.85668	0.104746	17.7256	2.66219e-70	1.82159e-68
PSMC3	672.794	2.08895	0.117885	17.7202	2.92825e-70	1.99572e-68
B3GNT2	699.001	2.32704	0.131338	17.718	3.04594e-70	2.06776e-68
RPL13A	15843.8	2.11095	0.119162	17.715	3.21227e-70	2.17212e-68
STK10	3038.86	-1.75521	0.0991025	-17.711	3.4463e-70	2.32127e-68
MTSS1	384.091	-3.49267	0.197825	-17.6553	9.26027e-70	6.16505e-68
KCNK5	760.762	2.66675	0.151128	17.6456	1.09949e-69	7.29175e-68
SRSF1	3347.53	1.99799	0.113326	17.6305	1.43604e-69	9.48723e-68
SNRPB	1292.76	2.42506	0.137674	17.6145	1.90711e-69	1.25513e-67
SLC2A5	998.924	3.52945	0.200829	17.5744	3.87018e-69	2.5374e-67
HIST1H2BB	695.604	3.33054	0.19016	17.5144	1.11228e-68	7.23736e-67
NDUFA13	934.774	2.30738	0.132008	17.4791	2.06665e-68	1.33967e-66
LRRC59	1020.03	2.27798	0.130398	17.4695	2.44808e-68	1.58098e-66
POLE3	563.785	2.22536	0.127401	17.4673	2.54206e-68	1.63555e-66
AK2	1876.99	1.91437	0.109864	17.4249	5.34028e-68	3.39788e-66
NDC1	342.461	2.87975	0.165588	17.3911	9.63585e-68	6.0639e-66
HBD	2664.71	9.58504	0.551374	17.3839	1.09241e-67	6.84958e-66
KARS	1028.89	1.73788	0.100186	17.3466	2.09373e-67	1.30805e-65
RPL8	5502.46	2.02325	0.116681	17.34	2.3461e-67	1.46043e-65
ESD	455.67	1.94156	0.111974	17.3395	2.36944e-67	1.46965e-65
HIST1H4C	1911.39	3.74525	0.216062	17.3341	2.60028e-67	1.60705e-65
SAP30	398.655	2.64096	0.152505	17.3172	3.48919e-67	2.14107e-65
MBD6	665.554	-2.3517	0.135815	-17.3154	3.6012e-67	2.20197e-65
SPN	9284.81	1.61452	0.0933248	17.3	4.70288e-67	2.85534e-65
RPS21	2265.53	2.53726	0.146674	17.2986	4.81581e-67	2.91365e-65
SRSF7	2298.34	1.22098	0.0707564	17.2561	1.00673e-66	6.0696e-65
NME4	869.531	3.22613	0.186966	17.2552	1.02302e-66	6.14633e-65
LDLR	968.715	-3.2633	0.189134	-17.254	1.04502e-66	6.25668e-65
RANBP1	1068.17	2.86479	0.166092	17.2483	1.15321e-66	6.88055e-65
GTF3C5	971.04	1.37363	0.0796646	17.2427	1.26956e-66	7.54862e-65
GCNT1	486.269	1.99127	0.115558	17.2319	1.53115e-66	9.04163e-65
MEST	609.732	2.3463	0.136205	17.2262	1.68953e-66	9.94288e-65
SPTA1	7937.97	4.89443	0.284379	17.2109	2.19798e-66	1.28911e-64
ATP6V0A1	1288.25	-2.26638	0.131768	-17.1998	2.66322e-66	1.55668e-64
SIK3	1201.37	-2.38066	0.138461	-17.1937	2.96094e-66	1.72485e-64
PHPT1	387.921	2.65548	0.154752	17.1596	5.32695e-66	3.0823e-64
DTL	542.632	2.69672	0.157307	17.1431	7.08264e-66	4.07087e-64
GAPDH	15372.7	2.15099	0.12552	17.1367	7.90153e-66	4.52645e-64
ZFP36L1	435.629	-2.76142	0.161565	-17.0917	1.71238e-65	9.7127e-64
SYNGR1	379.135	2.88882	0.169398	17.0534	3.29602e-65	1.8573e-63
HMGN1	2551.7	1.9741	0.115783	17.05	3.49687e-65	1.96406e-63
HIST2H2BF	2205.52	3.03801	0.178278	17.0409	4.08506e-65	2.28697e-63
PDCD6	717.305	1.38525	0.0813743	17.0232	5.52443e-65	3.07283e-63
GPSM2	660.153	2.94833	0.17334	17.009	7.04794e-65	3.90764e-63
RPS11	9810.08	1.9457	0.114547	16.986	1.04198e-64	5.72192e-63
NDUFB10	307.539	2.16917	0.127986	16.9486	1.97187e-64	1.07939e-62
CERS6	1399.49	1.29768	0.0767276	16.9128	3.61807e-64	1.96802e-62
INO80D	1037.7	-1.37077	0.081067	-16.9091	3.85796e-64	2.09191e-62
COX5A	359.257	2.18895	0.129542	16.8976	4.68264e-64	2.52321e-62
KIF15	514.483	3.01294	0.178305	16.8977	4.67992e-64	2.52321e-62
CCDC84	505.509	-1.76679	0.104591	-16.8924	5.12117e-64	2.74237e-62
MCC	553.887	-2.51202	0.148814	-16.8803	6.28338e-64	3.35431e-62
RAPGEF1	1504.96	-1.77629	0.105356	-16.8598	8.89102e-64	4.73173e-62
LRP1	2042.29	-3.1057	0.184386	-16.8435	1.17077e-63	6.21159e-62
GCA	504.816	2.01925	0.120396	16.7718	3.92332e-63	2.0688e-61
MSH6	1395.48	2.06177	0.122973	16.766	4.32592e-63	2.27414e-61
ATXN7L3B	944.329	1.52505	0.0909619	16.7658	4.34245e-63	2.27589e-61
OBSCN	1592.67	-2.92805	0.174884	-16.7429	6.3848e-63	3.33616e-61
WDR3	622.848	2.50129	0.149675	16.7115	1.08037e-62	5.61111e-61
TMEM123	1940.23	1.17486	0.0703546	16.6992	1.32927e-62	6.88308e-61
TK1	441.789	3.03326	0.182241	16.6442	3.33313e-62	1.71562e-60
CUTA	409.685	2.1777	0.130865	16.6408	3.52922e-62	1.81114e-60
KIT	922.745	1.94983	0.117218	16.6341	3.94442e-62	2.01821e-60
MFGE8	371.95	2.36986	0.142899	16.5841	9.07781e-62	4.63103e-60
HIST1H2AE	1917.83	2.77847	0.16762	16.576	1.03905e-61	5.28505e-60
TICRR	550.35	2.40878	0.145513	16.5538	1.5042e-61	7.60612e-60
HMGA1	2156.08	2.88425	0.174238	16.5535	1.51091e-61	7.61775e-60
RAVER2	356.281	2.06626	0.124933	16.5389	1.92366e-61	9.67045e-60
MRPS15	504.918	2.27022	0.13728	16.5372	1.97968e-61	9.92314e-60
GBE1	510.459	1.958	0.118689	16.4969	3.86416e-61	1.92017e-59
ASNA1	329.303	2.07397	0.126065	16.4516	8.16454e-61	4.04543e-59
PPIB	2005.37	2.38048	0.145066	16.4095	1.63417e-60	8.07392e-59
CPSF3	510.562	1.89711	0.115677	16.4	1.91136e-60	9.38961e-59
JAG1	355.974	1.67387	0.102098	16.3947	2.08715e-60	1.02241e-58
RPLP0	13952.2	2.44909	0.149472	16.3849	2.44981e-60	1.19666e-58
MNT	774.251	-2.33142	0.142431	-16.3688	3.1955e-60	1.5565e-58
EEF1G	14067.8	2.07383	0.127048	16.3231	6.75655e-60	3.28178e-58
EIF3B	2969.52	1.44304	0.0884915	16.3071	8.78244e-60	4.25009e-58
ARHGDIB	3852.53	1.81772	0.111495	16.3032	9.37234e-60	4.51417e-58
PRG3	300.793	2.97316	0.182536	16.2881	1.19914e-59	5.75955e-58
HIST1H2AM	1735.91	2.87715	0.176673	16.2852	1.25707e-59	6.02103e-58
KANK1	807.834	1.82083	0.111848	16.2795	1.37983e-59	6.5907e-58
RPS19	8366.2	2.5587	0.157221	16.2745	1.49742e-59	7.13258e-58
ANP32A	1743.56	1.14597	0.0704268	16.2718	1.56405e-59	7.40906e-58
REL	1954.16	-1.91779	0.11795	-16.2594	1.91727e-59	9.05741e-58
RRM2	1999.78	1.9716	0.121488	16.2288	3.15809e-59	1.47975e-57
HTRA2	483.562	2.0898	0.128821	16.2225	3.49508e-59	1.63322e-57
RPL35	4125.98	2.41442	0.148841	16.2215	3.55365e-59	1.6561e-57
PSMB7	516.517	1.9528	0.120409	16.218	3.76096e-59	1.74798e-57
FECH	2031.89	2.04137	0.12614	16.1834	6.60471e-59	3.06143e-57
ADD2	844.069	2.53848	0.156958	16.173	7.82006e-59	3.61505e-57
SKP2	596.144	2.20489	0.136448	16.1592	9.7764e-59	4.49532e-57
EIF3F	1535.16	1.69778	0.105071	16.1585	9.89896e-59	4.53957e-57
SPTBN1	4339.52	1.08397	0.0670903	16.1569	1.01521e-58	4.63102e-57
C19orf10	421.044	2.17207	0.134444	16.156	1.03101e-58	4.6907e-57
KIF2C	497.088	3.22794	0.199885	16.149	1.15438e-58	5.22439e-57
ETS1	826.711	-1.90584	0.11828	-16.1129	2.07003e-58	9.34386e-57
MST4	1057.49	1.76791	0.109722	16.1127	2.07876e-58	9.35875e-57
HNRNPA1P54	433.247	-2.48812	0.154467	-16.1078	2.24817e-58	1.00951e-56
HIST1H2AI	2426.03	3.68546	0.228826	16.1059	2.31907e-58	1.03864e-56
CAMK1D	625.598	-1.88076	0.116861	-16.094	2.81056e-58	1.25551e-56
HIST1H4D	1452.6	3.5223	0.218862	16.0937	2.82472e-58	1.25857e-56
C2CD3	1830.9	-1.51739	0.094323	-16.0872	3.13761e-58	1.39438e-56
BAZ2A	2232.46	-2.32692	0.1447	-16.081	3.46707e-58	1.53683e-56
GSE1	3657.19	-1.85757	0.115536	-16.0779	3.64687e-58	1.61238e-56
HMGB1	3937.04	2.25099	0.140156	16.0606	4.82118e-58	2.12613e-56
GNB2L1	9177.62	1.9232	0.119906	16.0393	6.79247e-58	2.98782e-56
SLC38A5	582.494	3.89395	0.24312	16.0166	9.78487e-58	4.27141e-56
MAZ	2638.41	1.70061	0.106197	16.0137	1.0248e-57	4.46227e-56
SBF2	1191.8	-2.0107	0.125702	-15.9958	1.36656e-57	5.9354e-56
EIF3K	1035.46	1.29025	0.0807602	15.9763	1.86807e-57	8.09325e-56
FAM221A	649.371	-2.77317	0.173664	-15.9686	2.1157e-57	9.12024e-56
CCT5	1514.12	2.02651	0.127209	15.9306	3.88888e-57	1.66806e-55
EDF1	1002.73	1.88385	0.118316	15.9222	4.44197e-57	1.89586e-55
YWHAG	1673.38	1.40847	0.0885441	15.9069	5.6717e-57	2.41474e-55
CCNB1	382.262	3.66547	0.23062	15.894	6.97233e-57	2.96118e-55
COX6A1	661.283	2.19182	0.137969	15.8863	7.87887e-57	3.33797e-55
EIF3L	2938.68	1.94764	0.12267	15.877	9.14115e-57	3.86326e-55
RPL10A	6751.96	2.39966	0.151172	15.8737	9.63952e-57	4.06392e-55
ARHGEF6	1730.73	1.06774	0.0673221	15.8602	1.19548e-56	5.01548e-55
ARID3B	436.43	-2.11768	0.133562	-15.8554	1.28939e-56	5.39637e-55
ICMT	570.186	2.337	0.147458	15.8486	1.43847e-56	5.99119e-55
C1orf186	885.785	2.05392	0.129605	15.8475	1.46356e-56	6.08099e-55
IMP3	301.072	2.04929	0.129422	15.8341	1.80921e-56	7.48112e-55
PCCB	530.328	1.87536	0.118506	15.825	2.09348e-56	8.63585e-55
FDPS	824.743	1.47006	0.0929099	15.8224	2.17931e-56	8.96846e-55
HIST1H3J	524.933	3.43331	0.217275	15.8017	3.02912e-56	1.2436e-54
DNAJC8	622.476	1.64784	0.104341	15.7928	3.4863e-56	1.42789e-54
C19orf48	733.355	1.94023	0.12313	15.7576	6.08816e-56	2.48175e-54
SEC13	665.675	1.52939	0.0970826	15.7535	6.49641e-56	2.64193e-54
NME1	482.117	3.23866	0.206165	15.7091	1.31069e-55	5.30524e-54
KIF22	1408.47	2.0021	0.127458	15.7079	1.3345e-55	5.38894e-54
ITGAX	1224.85	-2.11491	0.134787	-15.6908	1.74946e-55	7.04812e-54
NSUN5	370.812	2.19655	0.140013	15.6883	1.81961e-55	7.31363e-54
CLEC7A	574.939	-2.04835	0.130636	-15.6798	2.08069e-55	8.34357e-54
HINT1	1072.52	2.26251	0.144327	15.6763	2.1963e-55	8.78671e-54
BUB3	791.802	1.84391	0.117729	15.6622	2.74064e-55	1.08887e-53
RBMX	2075.45	1.56151	0.0996992	15.6623	2.73949e-55	1.08887e-53
KIAA0101	644.976	2.56872	0.164225	15.6415	3.79944e-55	1.50261e-53
TOP2A	1726.09	3.45539	0.22091	15.6416	3.79218e-55	1.50261e-53
EGFL7	736.268	2.96059	0.189641	15.6116	6.07345e-55	2.39097e-53
PPP1R8	355.643	1.62819	0.104299	15.6108	6.14514e-55	2.41368e-53
NIT2	313.294	2.02881	0.130192	15.5832	9.46796e-55	3.69358e-53
HIST1H3G	1234.3	3.52225	0.226114	15.5773	1.03794e-54	4.02186e-53
HMGN2	3614.72	2.44231	0.156821	15.5739	1.09559e-54	4.2357e-53
CITED2	1447.52	2.29385	0.147353	15.567	1.21966e-54	4.70482e-53
AC138827.2	645.434	-2.11199	0.135708	-15.5628	1.30369e-54	5.00658e-53
ANK1	3213.47	3.28667	0.211263	15.5572	1.42086e-54	5.43236e-53
FAM65A	779.928	-3.04587	0.196477	-15.5024	3.34093e-54	1.26332e-52
EMP2	328.529	-2.43697	0.157418	-15.4809	4.6712e-54	1.75099e-52
FARSB	370.795	2.10897	0.136266	15.4769	4.97206e-54	1.85972e-52
SCHIP1	391.462	2.62129	0.169412	15.4729	5.28894e-54	1.97397e-52
PRDX5	759.1	2.47215	0.160451	15.4075	1.4564e-53	5.41222e-52
DCAF13	436.313	2.21897	0.144024	15.4069	1.47125e-53	5.45563e-52
WDR34	484.756	2.81955	0.183145	15.3952	1.76296e-53	6.52332e-52
PRDX1	840.734	2.3444	0.152416	15.3816	2.17509e-53	8.01391e-52
BRI3BP	997.578	1.95555	0.127425	15.3466	3.73128e-53	1.36022e-51
NTPCR	446.003	2.46069	0.160432	15.3379	4.26916e-53	1.55302e-51
EIF2S2	718.922	1.99303	0.129984	15.3329	4.61142e-53	1.674e-51
MCM6	1119.75	2.37518	0.154992	15.3245	5.24577e-53	1.90027e-51
RPL36AL	777.048	1.52811	0.100019	15.2781	1.06983e-52	3.85923e-51
LMNB1	1523.97	2.12945	0.139649	15.2486	1.68303e-52	6.03335e-51
NDUFB8	820.195	1.72186	0.112978	15.2407	1.897e-52	6.77226e-51
FGR	974.356	-1.21872	0.0799845	-15.2369	2.01083e-52	7.1638e-51
KIAA0754	410.76	-1.73163	0.113761	-15.2216	2.54349e-52	9.04276e-51
RPL13	12760.9	2.35828	0.155088	15.2061	3.22036e-52	1.14257e-50
S100A9	17821.1	1.82154	0.119822	15.2021	3.42561e-52	1.2104e-50
TMX1	614.29	2.10465	0.138525	15.1933	3.9181e-52	1.38159e-50
HIST1H4B	934.441	3.34756	0.22071	15.1672	5.8293e-52	2.04714e-50
MSH2	630.731	3.03927	0.200398	15.1662	5.9243e-52	2.07627e-50
PARP1	2346.45	1.63807	0.108153	15.1458	8.0712e-52	2.81155e-50
TGFBRAP1	1253.38	1.19797	0.0791146	15.1422	8.52715e-52	2.96439e-50
TMOD1	378.413	2.72477	0.180416	15.1027	1.55386e-51	5.36937e-50
DUT	872.131	2.84244	0.188219	15.1018	1.5767e-51	5.43741e-50
RPS15	3788.81	2.18804	0.144901	15.1002	1.6138e-51	5.54318e-50
SNRPD2	850.988	2.79142	0.185131	15.078	2.25845e-51	7.68097e-50
THOP1	773.872	1.64191	0.108902	15.077	2.29592e-51	7.79303e-50
LIG1	2843.09	1.6358	0.108601	15.0624	2.86069e-51	9.69092e-50
SH2D3A	395.105	-2.42135	0.160795	-15.0586	3.03156e-51	1.02496e-49
RPA2	360.057	2.25216	0.149661	15.0483	3.54048e-51	1.19469e-49
NBPF9	1272.07	-2.34654	0.155999	-15.042	3.89487e-51	1.30915e-49
RPL3	13963.1	2.13345	0.141857	15.0394	4.05228e-51	1.3594e-49
FOS	7421.86	1.25521	0.0834729	15.0373	4.18416e-51	1.40092e-49
NFE2	1848.2	1.41829	0.0943289	15.0356	4.28963e-51	1.43345e-49
ZNF146	632.947	1.75062	0.116451	15.033	4.46116e-51	1.48789e-49
DNMT3B	367.309	2.59408	0.17265	15.0251	5.02668e-51	1.67326e-49
RPL14	3824.12	2.0978	0.139686	15.0179	5.60269e-51	1.85783e-49
NOP14	1084.85	1.20353	0.0801611	15.0139	5.95004e-51	1.96922e-49
SRP9	789.648	2.08	0.138614	15.0058	6.73093e-51	2.2234e-49
FRMD4B	387.068	-1.88522	0.125841	-14.981	9.76814e-51	3.21435e-49
ALAS2	2399	8.61867	0.575799	14.9682	1.18499e-50	3.89197e-49
HNRNPA0	1144.61	2.22031	0.148348	14.9669	1.20821e-50	3.96066e-49
IGFBP2	888	4.29198	0.286785	14.9658	1.22795e-50	4.01777e-49
IL10RA	2012.74	-2.33139	0.155828	-14.9614	1.31321e-50	4.28856e-49
AZU1	6449.69	4.43604	0.296812	14.9456	1.66282e-50	5.42005e-49
LTA4H	930.203	1.2713	0.0850963	14.9396	1.82125e-50	5.92526e-49
ALCAM	1090.91	1.95618	0.131091	14.9222	2.36278e-50	7.65816e-49
CREBBP	2111.39	-1.53709	0.103153	-14.901	3.24681e-50	1.0484e-48
BTF3	2327.82	1.87037	0.125638	14.887	4.00059e-50	1.28698e-48
ZNF22	406.515	2.60139	0.17483	14.8795	4.47974e-50	1.43844e-48
HTATSF1	953.417	1.94155	0.130545	14.8726	4.96432e-50	1.59108e-48
ALYREF	715.713	2.25566	0.151752	14.8641	5.63975e-50	1.80086e-48
TOMM22	530.796	2.10279	0.141507	14.86	5.99176e-50	1.9062e-48
RASGRP3	1176.62	-2.46079	0.165719	-14.8492	7.04466e-50	2.23292e-48
AMD1	1409.19	1.7211	0.116031	14.8331	8.95488e-50	2.82283e-48
RPS4X	9704.84	2.32257	0.15663	14.8284	9.59523e-50	3.01917e-48
B4GALT5	813.013	1.76651	0.119204	14.8193	1.09982e-49	3.45432e-48
FRY	1930.22	-1.68225	0.113519	-14.8191	1.10195e-49	3.45471e-48
MAP7	608.157	2.81103	0.189708	14.8177	1.12599e-49	3.52368e-48
KIAA1328	1875.47	-2.06888	0.139763	-14.8028	1.40613e-49	4.39238e-48
PDAP1	512.643	1.56135	0.105532	14.7951	1.57655e-49	4.90693e-48
RPN2	1776.84	2.09998	0.141944	14.7944	1.59159e-49	4.94482e-48
POLDIP2	500.153	1.84254	0.124596	14.7881	1.74819e-49	5.41186e-48
DDB2	553.963	1.03754	0.0701781	14.7843	1.84861e-49	5.71246e-48
RPS2	15046.7	2.24845	0.152391	14.7545	2.87881e-49	8.86416e-48
RPL12	6110.68	2.06346	0.139918	14.7476	3.1865e-49	9.79408e-48
ASH1L	1997.53	-1.43558	0.0974304	-14.7344	3.87483e-49	1.18674e-47
PLXDC2	1668.83	-1.49751	0.101845	-14.7038	6.09259e-49	1.86267e-47
MAMDC2	455.624	-3.13154	0.213114	-14.6942	7.01832e-49	2.14189e-47
MICAL2	852.934	-1.86233	0.126767	-14.6909	7.36962e-49	2.24513e-47
NET1	636.507	2.15448	0.146734	14.6829	8.29227e-49	2.52176e-47
MPEG1	2348.53	-1.36906	0.0932442	-14.6825	8.3452e-49	2.53338e-47
COPS3	584.817	1.30582	0.0890619	14.662	1.12974e-48	3.41757e-47
TTLL3	1442.74	-1.51575	0.103401	-14.659	1.17952e-48	3.5619e-47
CLEC11A	4548.06	3.57564	0.244065	14.6504	1.34013e-48	4.03278e-47
RPS12	5889.1	2.4795	0.169342	14.642	1.51602e-48	4.55412e-47
ZNF841	582.679	-3.5117	0.239863	-14.6405	1.55038e-48	4.64924e-47
PHC3	1454.44	-1.36472	0.0932648	-14.6327	1.73773e-48	5.20203e-47
AC010441.1	515.76	2.07984	0.142192	14.6269	1.89182e-48	5.6535e-47
PSMB4	955.776	1.66143	0.113756	14.6052	2.60301e-48	7.76534e-47
NPIPB5	1276.57	-2.67626	0.183351	-14.5964	2.96056e-48	8.80153e-47
HMGB2	4171.74	2.01644	0.138192	14.5916	3.17536e-48	9.42389e-47
DGKA	1056.31	-1.75709	0.120451	-14.5876	3.36779e-48	9.97782e-47
NCF4	1540.62	1.53657	0.1055	14.5646	4.71747e-48	1.39287e-46
WDR66	413.623	-2.33163	0.160191	-14.5553	5.40453e-48	1.593e-46
RFC3	357.971	2.15615	0.148137	14.5551	5.42091e-48	1.5951e-46
AKAP9	3238.08	-1.49509	0.102833	-14.539	6.85674e-48	2.01415e-46
POLR2G	306.755	1.67119	0.114977	14.535	7.27313e-48	2.13283e-46
PDIA3	2679.03	1.89317	0.130261	14.5337	7.41033e-48	2.16938e-46
SPCS1	301.904	1.88686	0.12984	14.5323	7.56857e-48	2.21195e-46
PSMB2	464.41	1.46124	0.100786	14.4985	1.23743e-47	3.59814e-46
EPB42	743.309	2.73566	0.188779	14.4913	1.37418e-47	3.98907e-46
TOMM40	771.648	2.67002	0.184307	14.4868	1.46806e-47	4.25441e-46
CYP3A5	601.017	-2.218	0.153179	-14.4798	1.62577e-47	4.69567e-46
MYH3	382.157	-2.60747	0.180181	-14.4714	1.8381e-47	5.2912e-46
PLK3	674.465	-1.5897	0.109853	-14.4712	1.84251e-47	5.29508e-46
HBA2	26802.2	17.6097	1.21805	14.4573	2.25485e-47	6.46927e-46
MLXIP	3175.96	-1.25427	0.0867743	-14.4544	2.35109e-47	6.7342e-46
PPM1G	1027.63	1.74532	0.120851	14.4419	2.81855e-47	8.0464e-46
SIDT2	547.307	-1.55585	0.107758	-14.4384	2.96572e-47	8.45255e-46
TM7SF3	1464.5	1.29993	0.0900407	14.4371	3.02199e-47	8.5987e-46
ERLIN2	595.986	1.49938	0.104038	14.4118	4.36339e-47	1.23747e-45
RAP1GAP2	1563.23	-1.61462	0.112148	-14.3973	5.38107e-47	1.51859e-45
NPM1	4752.9	2.69023	0.187317	14.3619	8.97201e-47	2.51961e-45
SERF2	2507.89	1.83596	0.128002	14.3432	1.17447e-46	3.28756e-45
EIF4B	5376.33	1.72241	0.120265	14.3218	1.59881e-46	4.46088e-45
RAN	1812.48	2.77683	0.193996	14.3139	1.79287e-46	4.99425e-45
ATP5O	694.581	2.17477	0.152108	14.2975	2.26688e-46	6.30449e-45
SLC43A1	616.946	2.36234	0.165568	14.2681	3.45743e-46	9.58464e-45
SRPK1	771.403	1.4145	0.0992404	14.2532	4.28001e-46	1.1827e-44
PTRF	333.519	2.2371	0.157137	14.2366	5.42846e-46	1.48812e-44
ATAD2B	2129.47	-2.02277	0.142086	-14.2362	5.45968e-46	1.4943e-44
TMED10	1233.55	1.63397	0.1148	14.2332	5.7043e-46	1.55878e-44
COX7A2L	516.668	1.93657	0.136088	14.2303	5.94553e-46	1.62213e-44
MX2	825.594	-1.37811	0.096897	-14.2224	6.65526e-46	1.81004e-44
KSR1	1738.28	-1.91018	0.134434	-14.209	8.05497e-46	2.18727e-44
SNRPD3	593.48	1.9747	0.139018	14.2046	8.57694e-46	2.3217e-44
ATP5G3	609.062	2.29914	0.162045	14.1883	1.08194e-45	2.92412e-44
PES1	733.15	1.60017	0.112804	14.1854	1.12837e-45	3.04483e-44
GOLGA8A	2398.24	-2.50618	0.176796	-14.1756	1.29792e-45	3.49687e-44
LMNA	1444.89	-2.9722	0.209696	-14.1738	1.33028e-45	3.57846e-44
ILF2	1242.28	2.0516	0.144766	14.1718	1.36961e-45	3.67854e-44
SAG	369.187	-2.325	0.164061	-14.1715	1.37434e-45	3.68549e-44
SAMM50	494.345	1.48782	0.10507	14.1602	1.61457e-45	4.323e-44
HAUS4	768.178	1.71563	0.121182	14.1575	1.67976e-45	4.49055e-44
MSRB3	496.053	2.12704	0.150315	14.1505	1.85408e-45	4.94126e-44
HOPX	307.144	1.9929	0.140903	14.1438	2.03938e-45	5.42669e-44
RASA3	1128.4	-2.03709	0.144037	-14.1428	2.06748e-45	5.493e-44
ANKRD11	4045.9	-1.32089	0.0934327	-14.1373	2.23705e-45	5.93439e-44
PEBP1	983.344	2.17454	0.153894	14.1301	2.47726e-45	6.56151e-44
NDUFS5	447.234	2.45308	0.173609	14.1299	2.48396e-45	6.56915e-44
CBX2	564.213	2.86835	0.203094	14.1232	2.7314e-45	7.21249e-44
PTPRE	1565.37	-1.5194	0.107733	-14.1034	3.61662e-45	9.52081e-44
EIF1AX	692.337	1.78136	0.126327	14.1012	3.73562e-45	9.8191e-44
HSD17B10	312.795	1.93122	0.137123	14.0839	4.77075e-45	1.25209e-43
TALDO1	2172.27	1.66224	0.118053	14.0805	5.00683e-45	1.31006e-43
AC021860.1	359.237	-1.75654	0.124761	-14.0792	5.09575e-45	1.3313e-43
ATP6V0E1	502.675	1.24119	0.088217	14.0698	5.82705e-45	1.51776e-43
AKR1A1	818.721	1.81578	0.129226	14.0512	7.57692e-45	1.9617e-43
RPS10	5036.23	2.30892	0.164492	14.0367	9.29146e-45	2.40199e-43
PKM	4570.01	1.29543	0.0923196	14.032	9.9264e-45	2.56229e-43
KIF4A	397.986	2.24256	0.15982	14.0317	9.96979e-45	2.56964e-43
GLO1	308.034	2.03698	0.145266	14.0225	1.13594e-44	2.91908e-43
SHMT1	321.402	1.42809	0.101947	14.0082	1.3889e-44	3.56381e-43
RPL27A	6775.87	2.13459	0.15258	13.99	1.79346e-44	4.59503e-43
PSMD3	913.51	1.69787	0.121382	13.9878	1.84945e-44	4.73148e-43
HIST1H2AB	360.352	3.38343	0.2422	13.9696	2.39101e-44	6.09886e-43
NUDC	726.831	1.33454	0.0956418	13.9535	2.99615e-44	7.63112e-43
WDFY2	1131.78	-1.81888	0.130528	-13.9347	3.89723e-44	9.86784e-43
CDC6	486.064	2.81035	0.201701	13.9333	3.97652e-44	1.00538e-42
ICAM3	2199.69	2.13309	0.153118	13.931	4.10789e-44	1.03708e-42
GPCPD1	2130.2	-1.93855	0.139183	-13.928	4.27998e-44	1.07737e-42
CCND2	2155.27	1.49399	0.107431	13.9065	5.78436e-44	1.45181e-42
HSPA14	324.415	1.69816	0.122281	13.8873	7.55914e-44	1.88902e-42
PGD	1535.02	1.10316	0.0794501	13.885	7.81284e-44	1.94959e-42
LDHB	2307.39	2.74464	0.197709	13.8822	8.12274e-44	2.02399e-42
PRPF31	578.599	1.55072	0.11173	13.8792	8.4675e-44	2.10382e-42
CHD2	4653.75	-1.42913	0.102972	-13.8788	8.51192e-44	2.11181e-42
RPL38	3556.23	2.07731	0.149702	13.8763	8.82056e-44	2.18211e-42
TUBB4B	1677.71	1.66929	0.12044	13.86	1.10731e-43	2.71213e-42
CAST	1016.15	-2.23605	0.161351	-13.8583	1.13319e-43	2.77157e-42
PPIA	5473.83	2.39452	0.173115	13.8319	1.63535e-43	3.98846e-42
LPIN1	1356.94	-1.6807	0.121566	-13.8254	1.79203e-43	4.35824e-42
FAU	2498.97	1.85095	0.134014	13.8116	2.16916e-43	5.26059e-42
ZNF274	845.483	-1.08786	0.0788788	-13.7915	2.86612e-43	6.93135e-42
ZSCAN18	1059.54	-2.37372	0.172485	-13.7619	4.32212e-43	1.04233e-41
PPA2	583.301	1.53418	0.111519	13.7572	4.61207e-43	1.1107e-41
POLD1	1305.01	2.12775	0.154834	13.7422	5.67636e-43	1.3632e-41
PDE4DIP	975.684	-2.14757	0.156349	-13.7358	6.1993e-43	1.48671e-41
PYCARD	505.476	1.88062	0.137084	13.7188	7.8377e-43	1.87182e-41
DLGAP5	376.254	3.81876	0.278761	13.699	1.02866e-42	2.4465e-41
S100A12	331.699	2.37902	0.173701	13.696	1.07263e-42	2.54756e-41
HDC	642.41	-2.31081	0.168829	-13.6873	1.20884e-42	2.86318e-41
CCT6A	1125.31	1.71074	0.124998	13.6861	1.22938e-42	2.90785e-41
TXLNG	304.048	1.89382	0.138571	13.6668	1.604e-42	3.78875e-41
AQP1	327.809	2.45962	0.180002	13.6644	1.65644e-42	3.90726e-41
NIPSNAP3A	308.745	1.34745	0.0986499	13.659	1.78529e-42	4.20544e-41
DDX21	1692.89	1.52591	0.111724	13.6578	1.81274e-42	4.26427e-41
TYMS	586.793	2.04759	0.150081	13.6432	2.21622e-42	5.19215e-41
RPL32	9544.55	2.18025	0.159816	13.6423	2.24448e-42	5.25124e-41
VAT1	957.685	2.29977	0.168769	13.6267	2.77761e-42	6.47221e-41
ZNF544	561.051	-2.0949	0.154009	-13.6024	3.87594e-42	8.98291e-41
PHF19	833.75	1.24725	0.0917809	13.5895	4.62517e-42	1.06906e-40
RPS18	11301.8	2.44975	0.180361	13.5824	5.08956e-42	1.17482e-40
RPL18	4880.78	2.0895	0.153999	13.5682	6.17984e-42	1.42459e-40
HIST1H3B	3355.59	3.75545	0.277325	13.5417	8.87091e-42	2.03676e-40
FCN1	541.376	2.63148	0.19446	13.5322	1.00917e-41	2.31091e-40
MRPS7	341.618	1.79328	0.132598	13.5242	1.12528e-41	2.56996e-40
ZBTB8B	482.525	-2.67435	0.197835	-13.5181	1.22367e-41	2.79097e-40
HIST1H4A	4684.74	3.75172	0.278078	13.4916	1.752e-41	3.9802e-40
SMS	514.152	1.859	0.137829	13.4878	1.84627e-41	4.18884e-40
SRSF3	2398.91	1.07349	0.0795977	13.4865	1.87818e-41	4.25563e-40
LSM7	454.769	1.89108	0.140287	13.4801	2.04915e-41	4.63694e-40
DNAJC3	823.512	1.24832	0.0928435	13.4455	3.27344e-41	7.3783e-40
PRDX3	819.572	1.97288	0.146735	13.4452	3.28634e-41	7.3977e-40
C4orf36	377.567	-1.56086	0.116192	-13.4335	3.84978e-41	8.65473e-40
GSDMB	514.956	-1.81044	0.134792	-13.4314	3.95961e-41	8.89004e-40
INCENP	776.743	2.24663	0.167579	13.4064	5.54694e-41	1.24054e-39
PRPF4	415.28	1.51106	0.112716	13.406	5.57955e-41	1.24622e-39
QARS	2176.4	1.54602	0.115347	13.4032	5.78786e-41	1.29108e-39
ZNFX1	1091.15	-1.02803	0.0767859	-13.3883	7.07584e-41	1.57228e-39
IFRD2	553.616	2.13963	0.159844	13.3857	7.33281e-41	1.62728e-39
MGST1	591.44	1.9996	0.149421	13.3823	7.66916e-41	1.69973e-39
PHKG2	761.57	1.02271	0.0764251	13.3819	7.71855e-41	1.70848e-39
GOLGA8B	2062.13	-2.15617	0.161174	-13.3779	8.14631e-41	1.80086e-39
MPC2	451.083	1.99243	0.149071	13.3657	9.59899e-41	2.11117e-39
WEE1	1094.24	1.76499	0.132116	13.3594	1.04457e-40	2.29445e-39
SZT2	2822.57	-1.49071	0.111674	-13.3488	1.20408e-40	2.64147e-39
LINC00999	530.289	-1.68895	0.126676	-13.3329	1.48995e-40	3.26445e-39
NFKBID	710.396	-2.16925	0.162838	-13.3215	1.73549e-40	3.79278e-39
KMT2D	7741.59	-1.66991	0.125428	-13.3137	1.92822e-40	4.20865e-39
CLSPN	680.997	2.37922	0.178772	13.3087	2.06011e-40	4.48516e-39
MCM4	1773.13	2.43908	0.183344	13.3033	2.21543e-40	4.81118e-39
HAX1	315.483	1.56918	0.118068	13.2905	2.62926e-40	5.70269e-39
RANGAP1	1245.16	1.73728	0.130902	13.2716	3.38471e-40	7.31359e-39
HIST1H1C	5247.66	1.76354	0.132898	13.2698	3.46349e-40	7.47446e-39
RPL19	10584.1	2.04266	0.154034	13.2611	3.89212e-40	8.38897e-39
MPI	343.873	2.55093	0.192416	13.2574	4.08955e-40	8.80352e-39
LMNB2	1271.01	2.87527	0.216897	13.2564	4.14242e-40	8.90621e-39
AKR7A2	325.159	2.72419	0.20559	13.2506	4.47745e-40	9.61452e-39
DARS2	319.339	1.82538	0.137893	13.2377	5.31618e-40	1.13872e-38
PACS1	741.635	-1.82656	0.138004	-13.2355	5.47208e-40	1.17066e-38
GSN	2872.7	1.83031	0.138395	13.2253	6.271e-40	1.33825e-38
TMED9	667.952	1.53728	0.11627	13.2217	6.57477e-40	1.39962e-38
AURKAIP1	349.703	1.98522	0.150231	13.2145	7.2392e-40	1.53537e-38
PSTPIP2	711.483	1.28567	0.0973203	13.2107	7.60924e-40	1.61187e-38
RPS3A	10719.5	2.25677	0.170858	13.2085	7.8399e-40	1.65869e-38
NONO	4198.45	1.43302	0.108497	13.2079	7.90147e-40	1.66967e-38
SSH2	1049.79	-1.35953	0.102983	-13.2015	8.60348e-40	1.81357e-38
CD96	744.22	2.91829	0.221341	13.1846	1.07582e-39	2.25673e-38
IGFBP7	1184.06	3.10831	0.236079	13.1664	1.36949e-39	2.86579e-38
EMG1	323.907	1.80441	0.137052	13.1658	1.38048e-39	2.8853e-38
TOP1MT	1353.04	1.90232	0.144521	13.163	1.43345e-39	2.99236e-38
GSS	433.156	1.75725	0.133636	13.1496	1.7117e-39	3.5689e-38
IL7R	300.566	-2.33245	0.177447	-13.1445	1.83129e-39	3.81364e-38
GUCY1A3	757.888	2.22888	0.169595	13.1424	1.88177e-39	3.91404e-38
CDK11A	1035.33	-1.13637	0.0865299	-13.1327	2.1388e-39	4.44329e-38
LSM4	547.957	2.32148	0.176785	13.1317	2.16832e-39	4.49921e-38
SMG1P1	4433.57	-1.63841	0.124796	-13.1287	2.25395e-39	4.67126e-38
GALNT2	1507.21	1.21873	0.0928434	13.1268	2.31283e-39	4.78234e-38
RPL23	5387.13	2.10896	0.160679	13.1253	2.35898e-39	4.87135e-38
EIF3I	916.029	1.82235	0.138859	13.1237	2.40889e-39	4.96847e-38
COX6B1	768.317	2.00799	0.153049	13.1199	2.53362e-39	5.2195e-38
EMB	1786.94	1.99521	0.152122	13.1159	2.66952e-39	5.4929e-38
KMT2C	5750.82	-2.04697	0.156094	-13.1136	2.75038e-39	5.65253e-38
OSTC	385.157	2.08663	0.159122	13.1134	2.76002e-39	5.6656e-38
CENPU	465.465	1.78967	0.136675	13.0943	3.54867e-39	7.25857e-38
SUMO2	986.498	1.68507	0.128696	13.0934	3.5917e-39	7.33787e-38
TPI1	2653.79	2.0103	0.153567	13.0907	3.72011e-39	7.59123e-38
CD97	3671.06	-1.84415	0.140915	-13.0869	3.91091e-39	7.97113e-38
OAZ1	6013.59	1.59242	0.121804	13.0736	4.65905e-39	9.46243e-38
PDLIM5	476.466	-2.84853	0.217915	-13.0717	4.77834e-39	9.69329e-38
EEF1D	3600.71	1.31331	0.100478	13.0707	4.8448e-39	9.81657e-38
RPS7	5454.2	2.25274	0.1727	13.0442	6.85707e-39	1.37966e-37
HERC1	5100.8	-1.45361	0.111451	-13.0425	7.01062e-39	1.40891e-37
CALU	482.252	1.99023	0.152639	13.0388	7.36397e-39	1.47819e-37
EID1	821.181	1.8334	0.140767	13.0244	8.89382e-39	1.77701e-37
NCAPG2	939.01	1.5056	0.115601	13.0241	8.92237e-39	1.78065e-37
KDM7A	735.548	-1.92511	0.147963	-13.0108	1.0621e-38	2.11232e-37
MBP	1111.06	-1.40761	0.108415	-12.9835	1.51721e-38	3.00015e-37
SUMO1	359.553	1.50976	0.116282	12.9836	1.51576e-38	3.00015e-37
ACTL6A	301.322	2.2159	0.17068	12.9828	1.5322e-38	3.02631e-37
PSME1	932.228	1.69765	0.13088	12.971	1.78684e-38	3.52523e-37
TMEM154	586.877	-1.36	0.104858	-12.9699	1.81265e-38	3.57205e-37
AC004057.1	1491.7	2.23112	0.172098	12.9643	1.95024e-38	3.83881e-37
TFDP1	1501.57	1.98936	0.153473	12.9623	2.00184e-38	3.93588e-37
EMR2	1972.44	-1.40021	0.108028	-12.9616	2.02115e-38	3.96932e-37
ARL2	431.209	1.39817	0.107892	12.9589	2.09188e-38	4.10357e-37
MYB	3035.6	2.11805	0.163452	12.9582	2.11077e-38	4.1359e-37
BMPR1A	441.373	-2.55288	0.197103	-12.952	2.28811e-38	4.4783e-37
SUMF2	888.539	1.16248	0.0898011	12.945	2.5064e-38	4.89443e-37
HIST1H4J	4551.27	2.96783	0.229322	12.9417	2.61684e-38	5.10431e-37
TTC7B	400.735	-1.60534	0.124136	-12.9321	2.96639e-38	5.7796e-37
RPL15	8516.96	2.19726	0.170054	12.9209	3.43004e-38	6.66789e-37
NELFE	512.91	1.50837	0.116792	12.9151	3.69991e-38	7.17632e-37
HN1L	405.519	2.17771	0.168679	12.9104	3.93058e-38	7.61517e-37
CARHSP1	492.106	1.6283	0.126152	12.9075	4.08395e-38	7.90343e-37
XK	610.532	7.11291	0.551093	12.9069	4.11529e-38	7.95516e-37
MRPS26	321.76	2.40708	0.186521	12.9051	4.21171e-38	8.13241e-37
POGZ	918.824	-1.79842	0.139377	-12.9033	4.31027e-38	8.31342e-37
BCS1L	313.983	1.99322	0.154575	12.8949	4.81031e-38	9.2675e-37
NOP56	1615.54	1.19258	0.0924982	12.893	4.92771e-38	9.48308e-37
TTI1	434.595	1.60158	0.124223	12.8927	4.94527e-38	9.50627e-37
STARD9	987.049	-2.16802	0.16826	-12.885	5.47084e-38	1.04932e-36
ADCY7	2000.6	-1.45461	0.112901	-12.884	5.54163e-38	1.06171e-36
GMPS	1127.16	1.8395	0.142986	12.8649	7.0971e-38	1.35371e-36
NDUFA11	607.714	2.25551	0.175454	12.8553	8.03289e-38	1.52714e-36
ITPA	353.627	1.4487	0.112727	12.8514	8.44869e-38	1.60441e-36
TMEM2	502.044	-2.3646	0.184059	-12.847	8.94053e-38	1.69408e-36
UNC80	342.906	-1.98989	0.154906	-12.8458	9.08123e-38	1.71886e-36
SRGN	7760.46	2.72503	0.212252	12.8386	9.96106e-38	1.88125e-36
RP11-3P17.3	2779.65	2.27394	0.177138	12.8371	1.01583e-37	1.9164e-36
C11orf48	456.914	1.76929	0.137897	12.8305	1.10647e-37	2.08284e-36
SLC25A46	413.541	1.69709	0.132428	12.8152	1.34839e-37	2.53547e-36
TMEM63A	1467.55	-1.30611	0.101981	-12.8073	1.49146e-37	2.7984e-36
CCDC69	868.234	-1.89367	0.147879	-12.8056	1.52539e-37	2.85895e-36
MTHFD2	608.305	1.64216	0.128317	12.7977	1.68861e-37	3.16142e-36
HIST1H3D	2492.4	2.87268	0.224518	12.7949	1.75172e-37	3.27602e-36
HIST1H4E	3157.09	1.97633	0.154539	12.7886	1.89985e-37	3.54921e-36
PLEKHM1	1094.76	-1.94125	0.151921	-12.778	2.175e-37	4.05443e-36
RCC1	979.53	2.26767	0.177663	12.7639	2.60915e-37	4.85324e-36
SFI1	1549.21	-1.8046	0.141397	-12.7626	2.65059e-37	4.925e-36
BRD4	1784.58	-1.88152	0.147436	-12.7616	2.6858e-37	4.98507e-36
NXF1	1788	-1.38779	0.10875	-12.7613	2.6969e-37	4.99491e-36
SPG20	831.663	1.71783	0.134691	12.7539	2.96482e-37	5.47936e-36
KLHDC3	637.458	2.02784	0.1591	12.7457	3.29214e-37	6.07778e-36
PMF1	434.711	1.24612	0.0978378	12.7365	3.70457e-37	6.81728e-36
RPL4	13065.9	2.00718	0.157764	12.7227	4.4246e-37	8.13362e-36
BPGM	420.721	2.57487	0.202564	12.7114	5.11077e-37	9.36504e-36
SCCPDH	1130.92	2.67451	0.210731	12.6916	6.58431e-37	1.20268e-35
HLA-DQA1	3287.01	-2.29411	0.180807	-12.6882	6.87595e-37	1.25462e-35
IDS	1591.96	-1.44216	0.113674	-12.6868	6.99585e-37	1.27515e-35
SLC39A3	761.278	1.82696	0.144037	12.684	7.25361e-37	1.32074e-35
GLRX5	817.569	2.51372	0.198181	12.6839	7.26222e-37	1.32091e-35
MCM5	3066.41	2.09945	0.16553	12.6832	7.32996e-37	1.33183e-35
AACS	805.275	-1.9147	0.151003	-12.6799	7.64671e-37	1.38792e-35
BRK1	404.571	1.50585	0.11884	12.6712	8.53658e-37	1.5478e-35
CECR5	493.818	1.772	0.139905	12.6658	9.15003e-37	1.65382e-35
LAS1L	618.394	1.73939	0.1374	12.6593	9.93402e-37	1.79364e-35
ARL6IP4	1298.87	1.55836	0.123102	12.6591	9.96211e-37	1.79683e-35
HOXA9	750.854	2.1321	0.168466	12.656	1.03673e-36	1.86796e-35
ADSL	712.721	1.27397	0.100705	12.6505	1.11195e-36	2.0014e-35
NUSAP1	876.774	1.69793	0.13427	12.6457	1.18201e-36	2.12527e-35
HIST1H2BK	2631.87	2.90852	0.230012	12.6451	1.19113e-36	2.13945e-35
RAD23B	1234.5	1.57766	0.124795	12.642	1.23818e-36	2.22164e-35
PDHA1	767.431	1.78767	0.141418	12.641	1.25377e-36	2.24728e-35
RPL17	5144.33	2.12528	0.168182	12.6368	1.3241e-36	2.37087e-35
CA5B	606.607	-1.43371	0.113536	-12.6279	1.48261e-36	2.65194e-35
KIAA0226	910.895	-2.12906	0.168772	-12.615	1.74454e-36	3.11077e-35
RTFDC1	781.896	1.20756	0.0958051	12.6043	1.99967e-36	3.56201e-35
UQCRH	929.224	2.39048	0.189682	12.6026	2.04378e-36	3.63683e-35
ATPIF1	420.008	2.24383	0.178196	12.5919	2.34001e-36	4.15539e-35
PGK1	3155.53	1.74339	0.138505	12.5872	2.48205e-36	4.40309e-35
PYCR2	826.667	1.37703	0.109492	12.5765	2.8443e-36	5.03019e-35
CCND3	907.417	1.39649	0.111066	12.5735	2.95326e-36	5.20154e-35
RPS24	7665.15	2.02293	0.161072	12.5591	3.54206e-36	6.21953e-35
DARS	745.87	1.61611	0.128683	12.5589	3.55312e-36	6.2326e-35
ACACB	490.376	-2.05493	0.163658	-12.5562	3.67346e-36	6.43061e-35
MRPL51	403.219	2.98723	0.23806	12.5482	4.06483e-36	7.10131e-35
HIST1H2AL	1076.92	2.93835	0.234415	12.5348	4.81556e-36	8.39583e-35
PTMA	10389.6	2.22343	0.177475	12.5281	5.23795e-36	9.12303e-35
NOL7	482.833	1.76129	0.140732	12.5153	6.16124e-36	1.07095e-34
CUL1	700.532	1.44424	0.1154	12.5151	6.17516e-36	1.07229e-34
CALM3	1583.84	1.65527	0.132403	12.5017	7.30694e-36	1.26754e-34
ATG16L2	4920.82	-1.08926	0.0871636	-12.4967	7.78344e-36	1.34884e-34
UQCRFS1	628.163	1.9078	0.152718	12.4922	8.23012e-36	1.42339e-34
ST3GAL1	1618.9	-1.36068	0.10905	-12.4776	9.89334e-36	1.70933e-34
GEMIN5	370.314	2.26352	0.181438	12.4754	1.0169e-35	1.75344e-34
PHF12	1586.27	-1.43286	0.114854	-12.4755	1.01603e-35	1.75344e-34
TNPO3	902.112	1.08355	0.0868624	12.4743	1.03129e-35	1.77471e-34
HIST1H2BN	1239.36	2.88141	0.231134	12.4664	1.13875e-35	1.95377e-34
NCOA2	1109.64	-1.3661	0.109611	-12.4632	1.18492e-35	2.03097e-34
MTCH2	389.776	2.04018	0.163754	12.4588	1.25284e-35	2.14525e-34
PELI1	517.668	-2.53456	0.203471	-12.4566	1.28737e-35	2.20002e-34
ZNF611	674.436	-1.67355	0.134358	-12.4559	1.29958e-35	2.21868e-34
RPL39	4517.77	2.24661	0.180507	12.4461	1.46765e-35	2.50313e-34
S100A8	5497.64	2.01011	0.161718	12.4297	1.80264e-35	3.06236e-34
CHCHD2	1264.67	2.35975	0.19014	12.4106	2.28937e-35	3.87775e-34
PRPS2	305.979	1.98926	0.160411	12.401	2.58009e-35	4.35308e-34
ERGIC3	1278.77	1.37404	0.110822	12.3987	2.65747e-35	4.47925e-34
NEDD9	319.031	-2.53985	0.205147	-12.3806	3.32782e-35	5.59274e-34
SLC43A2	1111.56	-3.28908	0.265672	-12.3802	3.34347e-35	5.61358e-34
CLIC1	2708.37	1.2023	0.0971914	12.3705	3.77613e-35	6.33383e-34
MARVELD1	445.476	1.53907	0.124496	12.3624	4.17556e-35	6.98342e-34
RSL24D1	528.111	1.45739	0.11789	12.3623	4.18191e-35	6.98727e-34
CXCR4	2801.22	1.54306	0.124825	12.3619	4.20271e-35	7.01523e-34
LRRFIP1	4335.12	-1.63413	0.132276	-12.3539	4.63978e-35	7.72983e-34
CDCA5	319.063	2.67355	0.216954	12.3231	6.80005e-35	1.12743e-33
NDUFC2	467.453	2.55903	0.20768	12.322	6.89694e-35	1.1424e-33
ATP2B1	1551.72	-2.76258	0.224234	-12.3201	7.06215e-35	1.16752e-33
CSNK2B	793.928	0.915579	0.0743315	12.3175	7.29052e-35	1.20412e-33
EIF6	528.895	1.53003	0.124279	12.3113	7.87896e-35	1.29882e-33
CBX1	305.055	1.72925	0.140571	12.3016	8.87741e-35	1.46202e-33
VCAN	4448.34	-2.61718	0.21276	-12.3011	8.93902e-35	1.47076e-33
ADAMTSL3	1389.34	-2.17819	0.177139	-12.2965	9.45676e-35	1.55252e-33
UQCRQ	384.868	2.63328	0.214189	12.2942	9.73451e-35	1.59555e-33
PHLPP2	436.316	-1.60973	0.131002	-12.2879	1.05249e-34	1.72346e-33
FAM122C	1161.65	-1.96867	0.160287	-12.2822	1.12912e-34	1.84545e-33
TP53BP2	1093.98	-0.923236	0.0751803	-12.2803	1.15583e-34	1.88731e-33
MYBL2	625.226	2.63873	0.214902	12.2788	1.1777e-34	1.9212e-33
ALDH5A1	359.17	2.14791	0.175248	12.2564	1.55199e-34	2.52526e-33
ERP29	1315.31	1.59424	0.130255	12.2394	1.91412e-34	3.10783e-33
SPAG5	1338.15	1.74632	0.142682	12.2392	1.91806e-34	3.11129e-33
PGM2	587.981	1.778	0.145332	12.2341	2.04387e-34	3.31227e-33
TCP1	1450.11	1.68003	0.137332	12.2333	2.06311e-34	3.3403e-33
PATZ1	586.719	1.47943	0.121072	12.2194	2.44939e-34	3.95828e-33
KBTBD11	779.486	2.50176	0.204824	12.2142	2.61002e-34	4.21391e-33
PPP1R14B	811.76	2.88117	0.235994	12.2087	2.79366e-34	4.50618e-33
PGAM1	1362.78	1.94784	0.159548	12.2085	2.79981e-34	4.51188e-33
RASGRP4	318.567	-1.27799	0.104728	-12.2029	2.99932e-34	4.82437e-33
TRIM71	344.763	1.52791	0.125253	12.1986	3.16356e-34	5.08381e-33
PSMB1	719.312	1.93635	0.158869	12.1883	3.5862e-34	5.75763e-33
C12orf57	375.244	1.9444	0.159578	12.1846	3.75385e-34	6.01558e-33
XBP1	2335.66	2.03577	0.167121	12.1814	3.90569e-34	6.25309e-33
CLPB	752.166	1.38149	0.113569	12.1643	4.81842e-34	7.69297e-33
SLC38A1	1805.83	1.14681	0.0943779	12.1513	5.64942e-34	9.01137e-33
CSAD	730.034	-2.00823	0.165289	-12.1498	5.74882e-34	9.16145e-33
HGSNAT	1011.53	-1.21516	0.10012	-12.1371	6.71382e-34	1.06894e-32
YWHAH	1040.84	1.91355	0.157676	12.1359	6.81363e-34	1.08383e-32
FOXN3	1609.53	-1.67494	0.138251	-12.1152	8.77641e-34	1.39092e-32
CYB5B	475.237	1.59649	0.13189	12.1047	9.97516e-34	1.57527e-32
C12orf50	453.694	-2.22545	0.183858	-12.1042	1.0037e-33	1.58342e-32
CHFR	1576.52	-1.19531	0.0988101	-12.0971	1.09475e-33	1.7239e-32
HIF1A	1829.83	-1.70538	0.141019	-12.0933	1.14638e-33	1.80191e-32
PRRC2A	4322.72	-1.05577	0.0873622	-12.085	1.26751e-33	1.98327e-32
TROAP	329.246	1.88904	0.156395	12.0786	1.37005e-33	2.13984e-32
GSTO1	594	1.61126	0.133405	12.0779	1.38202e-33	2.15657e-32
KPNA2	635.877	2.23688	0.185213	12.0773	1.39244e-33	2.17088e-32
SENP7	686.823	-1.81216	0.150232	-12.0624	1.66803e-33	2.59818e-32
CBX3	1189.06	1.78094	0.147695	12.0582	1.7555e-33	2.73196e-32
EIF3D	2028.62	1.23882	0.102756	12.056	1.80342e-33	2.80148e-32
COX8A	700.551	2.27738	0.189113	12.0424	2.12617e-33	3.29987e-32
ZNF829	637.138	-2.37599	0.197306	-12.0421	2.13436e-33	3.3096e-32
DENND1A	1281.92	-1.26199	0.104823	-12.0393	2.20947e-33	3.42299e-32
TMCO6	322.982	-1.52561	0.126721	-12.0391	2.21302e-33	3.42541e-32
UTP14A	336.397	1.69849	0.141113	12.0364	2.28754e-33	3.53441e-32
UROS	363.288	2.23247	0.185537	12.0324	2.39967e-33	3.70435e-32
PTPLAD1	391.823	1.65123	0.137263	12.0297	2.4802e-33	3.82523e-32
PVRL1	388.159	1.58347	0.131636	12.0291	2.49928e-33	3.85121e-32
AP1G1	1251.11	-0.938472	0.0780296	-12.0271	2.55919e-33	3.94e-32
PHACTR4	904.759	-1.55164	0.129029	-12.0254	2.61202e-33	4.01775e-32
FTSJ1	335.825	1.65848	0.137946	12.0227	2.69867e-33	4.14733e-32
RPS20	6171.23	2.14379	0.1784	12.0167	2.90175e-33	4.4515e-32
PSMA7	1182.89	1.51907	0.126416	12.0165	2.9108e-33	4.46142e-32
PRMT1	969.414	1.41511	0.117764	12.0164	2.91357e-33	4.46169e-32
CITED4	459.083	3.04963	0.253817	12.0151	2.95999e-33	4.52819e-32
SLC7A5	1525.88	2.11131	0.175722	12.015	2.96224e-33	4.52819e-32
MRPL28	353.023	1.93254	0.161004	12.003	3.42537e-33	5.22226e-32
KDM3A	1517.15	-1.32767	0.110629	-12.0011	3.50763e-33	5.34293e-32
EXTL3	664.088	-2.33524	0.194642	-11.9976	3.65716e-33	5.56089e-32
FAM69B	329.764	2.31681	0.193119	11.9968	3.69222e-33	5.60925e-32
PA2G4	1022.05	2.10144	0.175185	11.9955	3.75066e-33	5.69302e-32
FEM1A	591.82	1.75276	0.146126	11.9949	3.77883e-33	5.73073e-32
BCCIP	316.541	1.85561	0.154741	11.9917	3.92781e-33	5.95142e-32
CFL1	3948.22	1.36446	0.113855	11.9842	4.29987e-33	6.49235e-32
DOK1	492.074	1.77664	0.148285	11.9812	4.45565e-33	6.71581e-32
CYTIP	758.446	-1.81085	0.151164	-11.9794	4.55697e-33	6.86251e-32
ZNF793	681.736	-2.43218	0.20321	-11.9688	5.17954e-33	7.78648e-32
RBM5	3371.25	-1.20595	0.100824	-11.9609	5.69152e-33	8.54125e-32
PI4KAP1	854.667	-1.01655	0.085149	-11.9385	7.45626e-33	1.11314e-31
PPA1	655.848	1.86406	0.156243	11.9305	8.20878e-33	1.22443e-31
NMT2	620.684	-2.14254	0.179646	-11.9265	8.61208e-33	1.28237e-31
C14orf2	557.8	1.87355	0.157108	11.9252	8.74515e-33	1.30106e-31
FAM179A	563.831	-1.90868	0.160056	-11.925	8.76486e-33	1.30287e-31
TUBA1C	776.703	2.211	0.185453	11.9222	9.07219e-33	1.34739e-31
PEAK1	1146.08	-1.57005	0.131702	-11.9212	9.17308e-33	1.3612e-31
MTHFR	876.676	-1.93284	0.162201	-11.9163	9.73172e-33	1.44286e-31
HYOU1	1707.31	1.05876	0.0888803	11.9122	1.02297e-32	1.51278e-31
CDK1	376.813	3.60837	0.303105	11.9047	1.119e-32	1.65338e-31
EMP1	321.461	-1.86718	0.156854	-11.904	1.12857e-32	1.66467e-31
CAMTA2	481.92	-2.48627	0.209017	-11.8951	1.25494e-32	1.84791e-31
MAT2B	590.272	1.44331	0.121415	11.8874	1.37646e-32	2.02339e-31
METTL13	380.806	1.87062	0.157399	11.8846	1.42356e-32	2.08728e-31
PM20D2	661.415	2.04048	0.171722	11.8825	1.45998e-32	2.13886e-31
POFUT1	523.668	1.3185	0.110986	11.8799	1.50601e-32	2.20256e-31
NREP	757.056	3.00883	0.253437	11.8721	1.65233e-32	2.4145e-31
TOM1	695.139	-1.81382	0.152868	-11.8653	1.79307e-32	2.61795e-31
LFNG	574.187	-3.03274	0.255617	-11.8644	1.81204e-32	2.6434e-31
RPLP2	5800.9	1.7714	0.149308	11.864	1.82018e-32	2.65303e-31
MTDH	2982.77	1.58718	0.133904	11.8531	2.07288e-32	3.00864e-31
PSMB6	459.774	1.38436	0.116825	11.8498	2.15622e-32	3.12697e-31
NSRP1	751.432	-2.06188	0.17404	-11.8472	2.22529e-32	3.22443e-31
ATP5B	2432.6	1.74921	0.147673	11.8452	2.27986e-32	3.30073e-31
PYURF	508.554	2.22892	0.188395	11.8311	2.69533e-32	3.88591e-31
CEP57	973.112	1.05721	0.0893827	11.8279	2.80214e-32	4.03654e-31
SEPP1	300.857	2.98724	0.25283	11.8152	3.25722e-32	4.68426e-31
SEC61B	358.15	2.03578	0.172316	11.8142	3.29517e-32	4.73095e-31
CCRN4L	385.473	2.34333	0.198406	11.8108	3.43319e-32	4.925e-31
POLD2	600.724	1.87921	0.159216	11.8029	3.77111e-32	5.40077e-31
TTLL12	550.238	2.7065	0.229325	11.802	3.80972e-32	5.45078e-31
SSBP2	1498.47	-1.27127	0.107734	-11.8002	3.89566e-32	5.56527e-31
HINFP	683.307	-1.20955	0.102542	-11.7957	4.10792e-32	5.86365e-31
BST2	370.734	1.29997	0.110208	11.7956	4.11162e-32	5.86407e-31
HIST1H3A	348.323	3.14003	0.266266	11.7928	4.24996e-32	6.05637e-31
RSL1D1	1349.54	1.48771	0.126159	11.7924	4.27331e-32	6.08462e-31
SSR4	847.533	2.47351	0.209832	11.7881	4.49762e-32	6.39871e-31
FANCG	556.675	1.50375	0.12781	11.7655	5.87437e-32	8.34364e-31
LPPR3	639.695	4.56175	0.387815	11.7627	6.07713e-32	8.62452e-31
CTNNBIP1	369.517	1.86604	0.158766	11.7534	6.78586e-32	9.60661e-31
SFXN3	552.725	-1.378	0.117286	-11.749	7.14298e-32	1.01039e-30
C1orf228	1258.28	2.0857	0.177605	11.7435	7.63002e-32	1.07751e-30
HMGB3	357.757	2.77568	0.236363	11.7433	7.64612e-32	1.0789e-30
ITGA6	682.973	1.69154	0.144114	11.7375	8.18852e-32	1.15355e-30
RELB	337.752	-2.30496	0.196377	-11.7374	8.19656e-32	1.15374e-30
APBB3	527.809	-1.13922	0.0970684	-11.7362	8.30973e-32	1.16872e-30
PLK1	328.525	2.88325	0.245739	11.7329	8.63998e-32	1.21417e-30
MOB3A	753.042	-1.43034	0.122031	-11.7212	9.92998e-32	1.39205e-30
WDHD1	372.129	2.48119	0.211752	11.7174	1.03752e-31	1.45329e-30
PHAX	430.171	1.72484	0.147262	11.7128	1.09662e-31	1.53483e-30
TARS	885.717	1.84467	0.157499	11.7123	1.10214e-31	1.5413e-30
SNRPA	529.972	1.57329	0.134439	11.7026	1.23591e-31	1.72557e-30
MSN	6783.99	0.852404	0.0728562	11.6998	1.27745e-31	1.78213e-30
COX4I1	1725.32	1.69255	0.144693	11.6976	1.31157e-31	1.82825e-30
CYC1	717.726	2.14959	0.183889	11.6896	1.44115e-31	2.00724e-30
SSH1	729.512	-1.74683	0.149514	-11.6833	1.55062e-31	2.1545e-30
LRPAP1	1954.6	1.69933	0.145492	11.6798	1.61603e-31	2.24177e-30
GALNT1	759.953	1.61441	0.138401	11.6647	1.93108e-31	2.67236e-30
FARSA	1269.27	2.3782	0.203938	11.6614	2.00728e-31	2.77559e-30
GMPR2	361.171	1.41751	0.121628	11.6545	2.17544e-31	3.00329e-30
SNRPD1	379.901	2.84829	0.244408	11.6538	2.19451e-31	3.02478e-30
HNRNPF	2137.04	1.95786	0.168004	11.6536	2.19881e-31	3.02828e-30
MRPL37	437.785	2.29077	0.196697	11.6462	2.40041e-31	3.30066e-30
RPL6	6403.23	2.18992	0.188059	11.6448	2.43772e-31	3.3493e-30
GSTP1	1511.38	1.70244	0.146198	11.6447	2.44091e-31	3.35101e-30
PRRC2C	4598.15	-1.18454	0.10179	-11.6371	2.67088e-31	3.65798e-30
SRCAP	2375.41	-1.30056	0.111909	-11.6215	3.20409e-31	4.37436e-30
CTNND1	1448.22	-1.88054	0.162067	-11.6034	3.95841e-31	5.39138e-30
SLC39A9	577.586	1.44556	0.124591	11.6024	4.00719e-31	5.45351e-30
MAGED1	736.342	1.78722	0.154184	11.5915	4.5531e-31	6.19157e-30
GANAB	2648.76	1.06194	0.0916295	11.5895	4.65734e-31	6.32833e-30
TRIM10	348.99	7.21106	0.622255	11.5886	4.70759e-31	6.39158e-30
CD38	980.687	1.87722	0.16206	11.5835	4.99482e-31	6.76557e-30
ZNHIT1	557.297	1.44461	0.124752	11.5799	5.21128e-31	7.04216e-30
CNR2	378.582	-1.89514	0.16369	-11.5776	5.34943e-31	7.21754e-30
STAT6	2671.61	-0.858742	0.0742161	-11.5708	5.79183e-31	7.80223e-30
RPL24	3379.81	2.24899	0.194387	11.5697	5.87145e-31	7.89714e-30
MCM8	453.397	2.23831	0.193587	11.5623	6.39961e-31	8.58076e-30
ITGB1BP1	366.208	1.75611	0.151926	11.559	6.64453e-31	8.89532e-30
EMILIN1	708.369	3.01489	0.260857	11.5576	6.7545e-31	9.02852e-30
DDOST	1974.01	2.00824	0.173876	11.5498	7.39844e-31	9.88158e-30
NDUFA3	329.471	1.65567	0.143468	11.5403	8.26265e-31	1.10188e-29
B4GALT1	630.37	-1.18334	0.102631	-11.5301	9.30873e-31	1.23755e-29
C19orf43	1392.9	1.74902	0.151694	11.5299	9.31981e-31	1.23807e-29
PHLDB1	328.573	-2.45823	0.213317	-11.5238	1.00044e-30	1.32697e-29
NDUFB2	492.912	1.3386	0.116277	11.5122	1.14561e-30	1.51486e-29
HSD17B12	442.123	1.59229	0.13832	11.5117	1.15216e-30	1.52235e-29
PSMC2	455.777	1.56317	0.135803	11.5106	1.16678e-30	1.54049e-29
CCT3	1186.09	1.83112	0.159086	11.5102	1.17202e-30	1.54504e-29
ICAM1	402.666	-2.3903	0.207723	-11.5071	1.21427e-30	1.59952e-29
ZNF767	919.091	-1.46453	0.12729	-11.5055	1.23832e-30	1.62994e-29
MRPL23	403.705	1.82415	0.158573	11.5035	1.26606e-30	1.66265e-29
AIMP1	309.668	1.2099	0.10525	11.4955	1.38951e-30	1.82338e-29
DEK	2374.25	1.28422	0.111757	11.4913	1.45963e-30	1.91394e-29
BUB1B	634.917	2.37509	0.206693	11.4909	1.46595e-30	1.92078e-29
YBX1	5233.18	2.13395	0.185782	11.4863	1.54566e-30	2.02367e-29
RPS6	12497.6	2.30986	0.20127	11.4764	1.73352e-30	2.26792e-29
RPS29	2646.03	2.6004	0.226595	11.476	1.74129e-30	2.27634e-29
PRKCE	379.551	-1.51022	0.131705	-11.4667	1.94018e-30	2.53443e-29
ACAA2	355.179	1.45651	0.127117	11.458	2.14305e-30	2.7952e-29
ACTB	28630.5	1.00741	0.0879351	11.4562	2.18802e-30	2.8517e-29
PLK4	348.435	1.83361	0.160162	11.4485	2.39269e-30	3.10905e-29
TRGC1	300.901	1.73429	0.151548	11.4438	2.52507e-30	3.27859e-29
C19orf55	327.49	-1.7653	0.154306	-11.4403	2.63108e-30	3.41368e-29
GRHPR	751.499	1.56169	0.13654	11.4376	2.71334e-30	3.51775e-29
SPCS3	1545.05	1.38123	0.120776	11.4364	2.75203e-30	3.56256e-29
ABCA1	518.958	-3.03657	0.266019	-11.4148	3.52546e-30	4.55693e-29
NDUFB11	369.796	2.34457	0.205433	11.4128	3.60868e-30	4.66101e-29
RPS23	6757.31	2.39206	0.209612	11.4118	3.6499e-30	4.71073e-29
NCL	4569.07	1.60048	0.140302	11.4074	3.84072e-30	4.9533e-29
TRAPPC3	341.283	1.42523	0.124982	11.4035	4.01652e-30	5.17228e-29
PI4KA	4205.71	-1.28079	0.112332	-11.4018	4.09672e-30	5.27162e-29
RPL7	7582.15	2.13328	0.187409	11.383	5.07957e-30	6.51205e-29
SEC22B	395.912	1.29412	0.113694	11.3825	5.11024e-30	6.54649e-29
EEF1B2	4115.08	2.71731	0.238752	11.3813	5.18137e-30	6.63104e-29
HNRNPAB	1623.42	2.02293	0.177787	11.3784	5.35842e-30	6.84409e-29
EZH1	894.52	-1.26819	0.111514	-11.3725	5.73085e-30	7.31437e-29
PTPN14	790.329	-2.11077	0.185679	-11.3678	6.04596e-30	7.71084e-29
ITGAL	1892.15	-1.34954	0.118742	-11.3653	6.2276e-30	7.93663e-29
IARS	2065.66	1.5619	0.137473	11.3615	6.50442e-30	8.28329e-29
API5	545.507	1.2227	0.107706	11.3523	7.22698e-30	9.17635e-29
ERN1	491.028	-1.68126	0.148293	-11.3374	8.56258e-30	1.08562e-28
SRP14	572.983	1.7657	0.155765	11.3357	8.73675e-30	1.10608e-28
ADAM17	859.93	-1.25832	0.111032	-11.3329	9.01998e-30	1.1411e-28
DIS3	684.214	1.1496	0.101496	11.3265	9.70062e-30	1.22361e-28
VDAC3	696.481	1.71403	0.151367	11.3237	1.00176e-29	1.26083e-28
WDR91	949.641	-1.45901	0.128855	-11.3228	1.01141e-29	1.27133e-28
FH	330.035	1.96033	0.173216	11.3172	1.07833e-29	1.35325e-28
DISC1	955.819	-0.935621	0.0826859	-11.3154	1.10142e-29	1.38122e-28
CCNG1	669.758	1.78091	0.157429	11.3124	1.13872e-29	1.42695e-28
PSMB8	639.674	1.89994	0.167967	11.3114	1.15266e-29	1.44337e-28
HECTD4	3989.23	-1.88004	0.166297	-11.3053	1.23536e-29	1.54581e-28
SMIM12	484.014	1.11362	0.098515	11.304	1.25327e-29	1.56709e-28
UCP2	1014.37	-2.18513	0.193335	-11.3023	1.27818e-29	1.59476e-28
SPIN4	325.555	1.98765	0.175872	11.3017	1.28727e-29	1.60495e-28
AATF	774.752	1.34092	0.118735	11.2934	1.41455e-29	1.76236e-28
HIATL1	768.692	1.41849	0.12564	11.2901	1.468e-29	1.82764e-28
SSR2	1103.31	1.74526	0.154593	11.2893	1.48131e-29	1.84287e-28
ATRAID	402.219	1.7085	0.151386	11.2857	1.54452e-29	1.92013e-28
SRSF2	3010.75	1.49835	0.132803	11.2825	1.6021e-29	1.98889e-28
RPL5	5533.05	2.21621	0.196503	11.2782	1.68058e-29	2.08477e-28
RPL11	5479.85	1.73662	0.154011	11.2759	1.72525e-29	2.13864e-28
MTMR10	562.836	-1.29767	0.115206	-11.2639	1.97722e-29	2.44571e-28
CPT1A	2488.8	0.881571	0.0782705	11.2631	1.99551e-29	2.46656e-28
APRT	614.582	2.13638	0.189731	11.26	2.06662e-29	2.55263e-28
CLTA	980.628	1.64155	0.145794	11.2594	2.08248e-29	2.57037e-28
CRIP1	823.009	-2.89592	0.257426	-11.2495	2.32846e-29	2.86988e-28
USP5	837.038	1.8477	0.164544	11.2292	2.93057e-29	3.60426e-28
RP5-886K2.1	381.674	-2.58009	0.230056	-11.2151	3.43958e-29	4.22126e-28
BCKDHA	430.18	1.34058	0.119734	11.1963	4.25152e-29	5.2029e-28
HIST1H1D	3418.84	1.55973	0.139528	11.1787	5.18649e-29	6.32913e-28
CRELD2	400.058	1.41461	0.126611	11.1729	5.53644e-29	6.7514e-28
RAB32	722.526	1.674	0.1499	11.1675	5.88157e-29	7.16214e-28
TIMM13	516.007	2.73011	0.244583	11.1623	6.23339e-29	7.5852e-28
CDCA4	329.88	2.15621	0.193169	11.1623	6.23883e-29	7.58646e-28
TRPS1	1251.36	-1.74206	0.156357	-11.1416	7.87198e-29	9.52538e-28
BAZ1B	1814.14	1.41866	0.127618	11.1165	1.04325e-28	1.25619e-27
ZNF713	395.093	-1.63138	0.146792	-11.1136	1.07773e-28	1.2959e-27
NIPA2	503.738	1.49759	0.134774	11.1119	1.09793e-28	1.31836e-27
SNN	341.536	-1.09316	0.0984185	-11.1073	1.15613e-28	1.38728e-27
ALKBH5	609.227	1.41991	0.127925	11.0995	1.26092e-28	1.50777e-27
HSPD1	1800.04	1.8767	0.169089	11.0989	1.27018e-28	1.51779e-27
RP11-347C12.2	1386.89	-1.95952	0.176641	-11.0933	1.35279e-28	1.61427e-27
GCDH	518.204	1.64717	0.148531	11.0897	1.40738e-28	1.67825e-27
RHOBTB3	435.558	2.21605	0.19995	11.083	1.51711e-28	1.80535e-27
RBM10	1061.65	1.46901	0.132562	11.0817	1.53912e-28	1.83028e-27
PARP14	2311.6	-1.28455	0.115964	-11.0771	1.61947e-28	1.9245e-27
SAP18	679.785	1.6951	0.153111	11.0711	1.73344e-28	2.05568e-27
HIST1H2AK	407.091	2.98321	0.269677	11.0622	1.91393e-28	2.26817e-27
CLCN6	679.413	-2.25736	0.204085	-11.0608	1.9425e-28	2.30045e-27
C6orf48	859.417	1.31266	0.118686	11.0599	1.96368e-28	2.32303e-27
KLHL9	444.841	0.878859	0.0795247	11.0514	2.15824e-28	2.54719e-27
DCAF12	526.666	1.64582	0.149001	11.0457	2.29952e-28	2.70837e-27
KMT2E	3390.46	-2.05136	0.186029	-11.0271	2.82809e-28	3.32411e-27
GFI1B	361.523	2.58004	0.23399	11.0263	2.85436e-28	3.35271e-27
ST18	447.776	1.90507	0.172887	11.0192	3.08894e-28	3.62084e-27
CD4	345.113	-1.33536	0.121205	-11.0174	3.15028e-28	3.68523e-27
C9orf72	398.832	-1.77697	0.161342	-11.0137	3.28341e-28	3.83576e-27
SLA	940.446	1.26236	0.11462	11.0134	3.29405e-28	3.84559e-27
RPS8	8691.89	2.14396	0.194685	11.0124	3.32849e-28	3.88316e-27
DAD1	357.294	2.22161	0.201852	11.0061	3.57045e-28	4.16263e-27
ADI1	600.29	1.20479	0.109493	11.0034	3.68087e-28	4.28846e-27
PPP5C	579.813	1.54651	0.140554	11.003	3.69613e-28	4.30334e-27
ECHS1	497.467	2.26551	0.205938	11.0009	3.78152e-28	4.39978e-27
NFKBIZ	2127.32	-1.90667	0.17351	-10.9888	4.32532e-28	5.0291e-27
NUTF2	474.044	2.06958	0.188344	10.9883	4.34972e-28	5.05406e-27
LILRA2	388.421	1.20951	0.110115	10.9841	4.55867e-28	5.29328e-27
CD99L2	340.437	1.14	0.103923	10.9697	5.34405e-28	6.19687e-27
YY1	1609.33	1.46915	0.133947	10.9681	5.4391e-28	6.29439e-27
MRPS30	432.225	1.52431	0.139036	10.9634	5.72894e-28	6.62536e-27
SPINT2	795.955	1.42131	0.129756	10.9537	6.3776e-28	7.36071e-27
RAB11FIP1	2274.62	-1.39322	0.1273	-10.9444	7.06758e-28	8.13526e-27
BLVRB	903.746	1.56963	0.143534	10.9356	7.79052e-28	8.96144e-27
UBE2J1	1130.93	1.44461	0.132132	10.9331	8.01002e-28	9.20778e-27
MRPS27	561.377	1.49441	0.13669	10.9329	8.02741e-28	9.22163e-27
NCAPD2	1640.53	1.92393	0.175978	10.9328	8.03398e-28	9.22303e-27
CSNK1D	1573.91	-1.82243	0.166738	-10.9299	8.29145e-28	9.51227e-27
PXK	865.88	1.37796	0.126099	10.9277	8.50052e-28	9.73917e-27
RPS27	6459.5	1.94644	0.178142	10.9263	8.62824e-28	9.87894e-27
PPP1CA	1357.53	1.60728	0.14717	10.9212	9.126e-28	1.04419e-26
SCP2	456.547	1.57554	0.144362	10.9139	9.89671e-28	1.13087e-26
TTF2	1260.29	1.69139	0.155026	10.9103	1.02872e-27	1.17471e-26
HEXIM1	656.83	-1.6392	0.150265	-10.9087	1.04744e-27	1.1953e-26
DNAJA1	915.05	1.33738	0.122619	10.9068	1.07006e-27	1.2195e-26
PAM	328.888	1.33227	0.122173	10.9048	1.09355e-27	1.24544e-26
SYPL1	319.828	1.25523	0.115128	10.903	1.11571e-27	1.26901e-26
CCT2	1244.67	1.4924	0.136957	10.8969	1.19306e-27	1.35521e-26
CDC45	607.555	2.01726	0.185148	10.8954	1.21288e-27	1.37681e-26
EBNA1BP2	338.112	1.56051	0.14332	10.8882	1.31147e-27	1.48579e-26
HIST2H2AB	856.096	2.56222	0.235381	10.8854	1.35287e-27	1.53068e-26
GUCD1	1090.17	1.40565	0.12922	10.878	1.46823e-27	1.65902e-26
ERMP1	556.272	1.78954	0.164609	10.8714	1.57684e-27	1.78058e-26
ZNF554	455.758	-1.76863	0.162703	-10.8703	1.59674e-27	1.80187e-26
RABGAP1L	1914.02	-1.31108	0.120641	-10.8676	1.64478e-27	1.85366e-26
RFXANK	400.794	1.97918	0.182196	10.8629	1.73077e-27	1.94548e-26
RPN1	2008.69	1.32463	0.121959	10.8613	1.76177e-27	1.97904e-26
UBL5	646.993	2.26623	0.208691	10.8592	1.80232e-27	2.02196e-26
AURKB	399.854	1.53555	0.141486	10.853	1.92954e-27	2.16186e-26
RHOT1	598.496	1.32844	0.122553	10.8397	2.23099e-27	2.49313e-26
POLR2A	4235.65	-1.69488	0.156534	-10.8275	2.54954e-27	2.84542e-26
CLNS1A	1093.53	2.0027	0.184983	10.8264	2.58104e-27	2.87872e-26
SEMA4D	1930.27	-1.32063	0.122074	-10.8183	2.82002e-27	3.13917e-26
TLR4	576.321	-1.41727	0.131017	-10.8175	2.84416e-27	3.16399e-26
EIF3H	1187.81	1.40455	0.129889	10.8135	2.97095e-27	3.30078e-26
KIAA1211	449.521	2.09134	0.193495	10.8082	3.14756e-27	3.4925e-26
RHCE	384.94	6.59242	0.610764	10.7937	3.68494e-27	4.08352e-26
MARVELD2	302.498	-2.27246	0.210553	-10.7928	3.72146e-27	4.11869e-26
RCSD1	2058.57	1.02678	0.0951783	10.788	3.9242e-27	4.33194e-26
HKR1	830.099	-1.77928	0.165182	-10.7716	4.6879e-27	5.16178e-26
ZNF506	841.606	-1.54574	0.143557	-10.7675	4.90319e-27	5.39194e-26
DCTD	406.71	1.4504	0.134704	10.7673	4.91138e-27	5.39751e-26
PSMG3	325.849	1.32147	0.122742	10.7663	4.96672e-27	5.45138e-26
PLAC8	1373.72	1.67401	0.155886	10.7386	6.70185e-27	7.32319e-26
JARID2	4018.05	-0.817938	0.0762249	-10.7306	7.31297e-27	7.97581e-26
TMBIM4	442.306	1.34878	0.125751	10.7258	7.70482e-27	8.38197e-26
AARS	955.592	1.43388	0.133713	10.7236	7.88911e-27	8.57277e-26
ARHGEF18	2075.74	1.49612	0.139517	10.7236	7.89015e-27	8.57277e-26
CBFA2T2	769.499	-1.35576	0.126547	-10.7135	8.79677e-27	9.5458e-26
LDHA	1684.97	1.68844	0.157677	10.7082	9.3115e-27	1.00917e-25
CAPRIN2	506.275	-1.41771	0.132403	-10.7075	9.38499e-27	1.01649e-25
SMARCA2	3174.32	1.93316	0.180604	10.7039	9.76344e-27	1.05682e-25
MRPS25	723.762	1.35742	0.126831	10.7026	9.89846e-27	1.07076e-25
IGBP1	505.835	1.12674	0.105346	10.6956	1.0669e-26	1.15339e-25
ANLN	681.515	2.42541	0.22688	10.6902	1.13077e-26	1.22091e-25
COMMD4	422.421	1.40602	0.131617	10.6826	1.22779e-26	1.324e-25
G3BP1	2029.59	1.10229	0.103229	10.6782	1.28806e-26	1.38726e-25
SS18L1	332.837	-1.45581	0.13642	-10.6715	1.38395e-26	1.48867e-25
GHITM	883.847	1.64283	0.153953	10.671	1.39122e-26	1.49557e-25
POLR3D	651.583	1.38508	0.129816	10.6696	1.41297e-26	1.51799e-25
SMG6	1011.07	-1.30959	0.122747	-10.669	1.42191e-26	1.52665e-25
MRPS34	413.307	2.52026	0.236233	10.6685	1.4288e-26	1.5331e-25
CD33	620.999	0.96236	0.0902101	10.668	1.43702e-26	1.54095e-25
PRDX6	840.472	1.57358	0.147556	10.6643	1.49534e-26	1.6015e-25
NDUFB4	313.92	1.81354	0.170061	10.6641	1.49894e-26	1.60336e-25
PPTC7	747.762	-1.5696	0.147224	-10.6613	1.54423e-26	1.64977e-25
EIF4A3	860.665	1.31824	0.123665	10.6598	1.56961e-26	1.67584e-25
OGFOD1	454.856	2.07567	0.194753	10.6579	1.60106e-26	1.70836e-25
ZC3H7A	540.318	-1.27546	0.11976	-10.6502	1.7404e-26	1.8536e-25
DDRGK1	476.297	1.24803	0.117222	10.6467	1.80634e-26	1.92263e-25
PKN2	954.535	-1.58173	0.148624	-10.6425	1.88931e-26	2.00847e-25
POLR2F	303.172	2.11596	0.198899	10.6384	1.97565e-26	2.09896e-25
RAB44	1858.46	1.12463	0.105737	10.6362	2.02276e-26	2.14768e-25
SNCA	510.441	2.16211	0.2033	10.6351	2.04701e-26	2.17209e-25
HDAC4	1314.1	-1.69406	0.159462	-10.6236	2.31453e-26	2.45295e-25
RBM8A	1081.85	1.68225	0.158474	10.6154	2.52833e-26	2.67789e-25
ANP32E	800.633	2.28764	0.215552	10.613	2.59415e-26	2.74454e-25
MT-CO3	142963	-1.74262	0.164197	-10.6129	2.59445e-26	2.74454e-25
RPL37	6721	2.15926	0.203622	10.6042	2.84771e-26	3.00877e-25
SLC39A7	397.798	1.64905	0.155661	10.5939	3.18197e-26	3.35576e-25
TSPYL1	1123.97	1.07697	0.101778	10.5815	3.63046e-26	3.82407e-25
TBCA	390.545	2.26858	0.214442	10.579	3.72987e-26	3.92399e-25
OCLN	309.05	-2.41817	0.228623	-10.5771	3.80476e-26	4.00033e-25
C20orf194	379.125	-1.42726	0.134979	-10.5739	3.93582e-26	4.13561e-25
FIS1	591.473	1.59642	0.151027	10.5705	4.08458e-26	4.28931e-25
PIK3R5	990.683	-2.01102	0.190376	-10.5634	4.40233e-26	4.61736e-25
WHAMMP3	530.512	-1.96227	0.185933	-10.5536	4.88642e-26	5.11266e-25
IARS2	587.329	1.56172	0.148003	10.552	4.97403e-26	5.20116e-25
ACTG1	14906	1.70898	0.161991	10.5499	5.08569e-26	5.3147e-25
STRN4	1177.96	-1.13882	0.107971	-10.5474	5.22054e-26	5.44901e-25
FGFR1OP2	771.992	0.775103	0.0735076	10.5445	5.38423e-26	5.61647e-25
KLC4	393.116	-1.6135	0.153103	-10.5387	5.73034e-26	5.9739e-25
XRCC3	572.488	1.51855	0.144156	10.5341	6.01681e-26	6.26875e-25
NCOR1	3199.63	-1.20505	0.114403	-10.5333	6.06474e-26	6.31106e-25
PCNXL2	389.439	-1.89264	0.179759	-10.5287	6.36846e-26	6.61913e-25
ME2	556.538	1.27865	0.121511	10.523	6.77167e-26	7.02551e-25
PSMC4	486.272	1.21123	0.115198	10.5143	7.4203e-26	7.69382e-25
RPL27	3024.82	1.94245	0.184884	10.5063	8.07955e-26	8.3673e-25
SLC25A11	406.353	1.56328	0.148869	10.501	8.54319e-26	8.83155e-25
ORAI3	485.284	1.74883	0.166742	10.4882	9.78312e-26	1.00771e-24
PTPRCAP	542.525	3.44618	0.328729	10.4833	1.03047e-25	1.06016e-24
CDC123	586.86	1.84151	0.175754	10.4778	1.09273e-25	1.12222e-24
LRCH3	1287.36	-1.42081	0.135617	-10.4767	1.10563e-25	1.13478e-24
TTN	423.829	-4.71591	0.450262	-10.4737	1.14096e-25	1.17035e-24
SEC61A1	1753.73	1.0542	0.100688	10.47	1.18582e-25	1.21492e-24
AC004824.2	334.249	-2.40192	0.229417	-10.4697	1.19052e-25	1.21901e-24
PAGR1	555.03	1.8056	0.172524	10.4658	1.24014e-25	1.26907e-24
H2AFV	1544.27	1.79228	0.171296	10.4631	1.27603e-25	1.30347e-24
RHAG	842.43	8.84665	0.845807	10.4594	1.32668e-25	1.3544e-24
PRC1	1416.47	1.3009	0.124527	10.4467	1.5174e-25	1.54637e-24
RP11-193H22.2	364.203	-2.34232	0.224421	-10.4372	1.67661e-25	1.70559e-24
CASP3	661.623	1.7126	0.164087	10.4371	1.67847e-25	1.70648e-24
LAMP1	1555.63	1.22218	0.117181	10.4299	1.81154e-25	1.83744e-24
PSMB3	550.125	1.97451	0.189579	10.4152	2.11351e-25	2.13618e-24
RPS9	6420.24	2.05135	0.197075	10.409	2.25605e-25	2.27492e-24
HIST1H1E	9289.86	1.64113	0.157708	10.4061	2.32444e-25	2.33977e-24
DST	1013.53	-2.66086	0.255815	-10.4015	2.44084e-25	2.45408e-24
OPTN	376.31	-2.31124	0.22252	-10.3867	2.85186e-25	2.86065e-24
PARK7	752.623	1.33402	0.128438	10.3865	2.85788e-25	2.86503e-24
NCBP2	366.234	1.62522	0.156556	10.3811	3.02318e-25	3.02897e-24
LPP	1443.63	-1.73785	0.167506	-10.3748	3.22722e-25	3.23153e-24
LYL1	1436.11	1.92229	0.185285	10.3748	3.22992e-25	3.23236e-24
SLC37A4	332.463	2.97657	0.286931	10.3738	3.26237e-25	3.26294e-24
PHC2	807.43	1.61712	0.155929	10.3709	3.36465e-25	3.35939e-24
SRRM2	12882.6	-1.62489	0.156777	-10.3644	3.60198e-25	3.58878e-24
ZNF629	385.549	1.21049	0.116844	10.3599	3.77377e-25	3.75699e-24
YME1L1	1504.66	0.977933	0.0944078	10.3586	3.82489e-25	3.80569e-24
SAMD1	519.755	1.42194	0.137335	10.3538	4.02037e-25	3.99557e-24
LTBP1	585.974	4.23918	0.409564	10.3505	4.16408e-25	4.13364e-24
COX6C	449.63	2.04375	0.19748	10.3492	4.22124e-25	4.18796e-24
KCNK17	399.33	1.79433	0.17343	10.3462	4.35645e-25	4.31466e-24
DIAPH3	386.188	1.80938	0.17514	10.3311	5.09801e-25	5.02889e-24
TPGS2	577.729	1.71461	0.166126	10.3211	5.65515e-25	5.55622e-24
NOTCH2NL	1798.7	-1.47734	0.14317	-10.3188	5.79172e-25	5.68716e-24
ATP5F1	1065.51	2.14353	0.207754	10.3176	5.86485e-25	5.7557e-24
R3HDM1	465.268	-1.27154	0.123272	-10.315	6.03104e-25	5.91543e-24
ERC1	1424.17	-1.90402	0.184624	-10.313	6.15725e-25	6.03578e-24
GOPC	478.103	1.17374	0.113967	10.299	7.11881e-25	6.96255e-24
P2RX5-TAX1BP3	458.968	-2.22338	0.215933	-10.2966	7.29883e-25	7.13456e-24
HAUS6	462.673	1.30176	0.126461	10.2938	7.51758e-25	7.34007e-24
IFT122	955.578	-1.26399	0.122811	-10.2922	7.64044e-25	7.4558e-24
AKAP13	5117.88	-1.22008	0.11857	-10.2899	7.82313e-25	7.62977e-24
PRR13	547.968	0.809514	0.0786877	10.2877	8.00859e-25	7.80622e-24
HIST1H3I	813.339	2.9221	0.284159	10.2833	8.38025e-25	8.15466e-24
CXorf21	571.757	1.87403	0.182307	10.2795	8.71605e-25	8.47664e-24
UBE2L3	550.05	1.71102	0.16652	10.2752	9.11939e-25	8.8639e-24
SSBP1	693.498	1.62714	0.15837	10.2743	9.20399e-25	8.94109e-24
CENPB	816.001	2.1642	0.210691	10.2719	9.42982e-25	9.15017e-24
WDR83OS	663.604	1.85396	0.180514	10.2704	9.57994e-25	9.28538e-24
HIST1H3F	1526.34	3.56253	0.34693	10.2687	9.74819e-25	9.44315e-24
AK3	336.023	1.95625	0.190512	10.2684	9.78315e-25	9.47169e-24
PSMC5	525.381	1.43239	0.139508	10.2674	9.88028e-25	9.56036e-24
GTF3A	1079.13	1.91171	0.186228	10.2654	1.00854e-24	9.7479e-24
REXO4	330.238	1.81095	0.176597	10.2547	1.12684e-24	1.08669e-23
SIGLEC10	377.55	-1.52293	0.14855	-10.2519	1.15984e-24	1.11665e-23
EEF1A1	78908.9	1.78174	0.173971	10.2416	1.29057e-24	1.24112e-23
PSMA2	663.506	2.17675	0.212579	10.2398	1.31569e-24	1.26457e-23
RAB11B	525.464	-1.14944	0.112267	-10.2384	1.33395e-24	1.28141e-23
AHSP	1649.41	12.1656	1.18892	10.2324	1.41941e-24	1.36123e-23
SLC25A3	2118.09	1.23217	0.120526	10.2233	1.56011e-24	1.49367e-23
EIF4H	2252.25	1.19632	0.117022	10.223	1.56367e-24	1.49625e-23
SLCO3A1	629.828	-1.9715	0.192873	-10.2218	1.58454e-24	1.51537e-23
PSMB9	494.661	1.11039	0.108638	10.2211	1.59579e-24	1.52529e-23
DDT	388.984	2.08942	0.204463	10.2191	1.62885e-24	1.55516e-23
PSME2	681.736	1.68278	0.16469	10.2178	1.64979e-24	1.57428e-23
TRIO	2381.55	-1.25435	0.122798	-10.2148	1.70237e-24	1.62266e-23
CCDC144A	681.429	-1.2131	0.118772	-10.2137	1.72179e-24	1.64027e-23
CACYBP	422.902	2.17772	0.213232	10.2129	1.7354e-24	1.65141e-23
GEMIN4	572.586	2.18354	0.213802	10.2129	1.7354e-24	1.65141e-23
TXNL4A	389.718	1.71747	0.168172	10.2126	1.74171e-24	1.6565e-23
TXN2	384.837	1.14819	0.112554	10.2012	1.95749e-24	1.8607e-23
UBA52	3662.02	1.89275	0.18563	10.1963	2.05906e-24	1.95401e-23
TMCO3	995.082	0.936417	0.0918589	10.1941	2.1072e-24	1.99749e-23
CDK2	452.34	2.42584	0.237974	10.1937	2.11492e-24	2.00371e-23
BCL7C	333.682	1.71617	0.16838	10.1922	2.14778e-24	2.03373e-23
CRYZL1	411.85	-1.57932	0.155152	-10.1792	2.45656e-24	2.32356e-23
FAM20B	656.206	1.18029	0.115959	10.1785	2.47256e-24	2.33741e-23
APOBEC3C	409.907	1.08458	0.106611	10.1732	2.61126e-24	2.46312e-23
ADCK3	1762.17	1.21109	0.119129	10.1662	2.8057e-24	2.6422e-23
PUF60	880.948	1.17367	0.115502	10.1615	2.94597e-24	2.76674e-23
C5orf45	1067.67	-1.45212	0.14292	-10.1604	2.97824e-24	2.794e-23
LMAN2	1074.42	1.46995	0.144685	10.1596	3.00174e-24	2.81452e-23
NAMPT	1057.58	-1.67795	0.165283	-10.152	3.24686e-24	3.03774e-23
SLFN13	502.957	1.38683	0.136622	10.1509	3.28485e-24	3.06995e-23
PPIE	428.579	1.257	0.123836	10.1506	3.29405e-24	3.07688e-23
FAM136A	321.13	1.32363	0.130411	10.1497	3.32463e-24	3.10377e-23
TRMT112	427.416	1.95632	0.19304	10.1343	3.892e-24	3.62364e-23
C16orf13	340.579	2.74941	0.271339	10.1328	3.95344e-24	3.67687e-23
RRP7A	1007.57	1.41726	0.139968	10.1256	4.25526e-24	3.95118e-23
NBPF20	438.318	-1.87821	0.185532	-10.1234	4.35001e-24	4.03482e-23
HIST1H2AC	2395.84	2.06871	0.204352	10.1233	4.35638e-24	4.03855e-23
GBAS	441.666	-0.823851	0.0814289	-10.1174	4.62411e-24	4.28444e-23
PIGL	708.334	-1.67824	0.165887	-10.1167	4.65751e-24	4.31076e-23
BEX4	357.856	1.69363	0.167426	10.1157	4.70647e-24	4.35373e-23
TTC39B	356.851	-2.38989	0.236428	-10.1083	5.07643e-24	4.69345e-23
TGIF1	322.433	1.28145	0.12681	10.1053	5.23196e-24	4.83206e-23
ZZEF1	3356.87	-1.50643	0.149094	-10.1039	5.30821e-24	4.89987e-23
CTSW	419.047	1.35771	0.134479	10.096	5.75371e-24	5.29126e-23
PTPN23	1017.44	-1.61323	0.159869	-10.091	6.0559e-24	5.56323e-23
AP000974.1	451.72	-2.6121	0.25897	-10.0865	6.34026e-24	5.81826e-23
HADHB	778.181	1.31475	0.130394	10.0829	6.57418e-24	6.02651e-23
USP1	849.314	2.41275	0.239321	10.0816	6.66069e-24	6.10257e-23
TMED8	711.651	1.41954	0.140858	10.0778	6.92551e-24	6.34182e-23
NFKBIA	2852.07	-1.21853	0.121009	-10.0697	7.51725e-24	6.88004e-23
TMCO1	334.221	1.94389	0.193055	10.0691	7.56416e-24	6.91563e-23
CHCHD3	663.272	1.44077	0.143104	10.068	7.65474e-24	6.99473e-23
TTYH3	1144.14	-2.44433	0.242807	-10.067	7.73167e-24	7.0613e-23
IRF1	2107.61	-1.28236	0.127407	-10.065	7.88658e-24	7.19896e-23
GMFG	1204.29	1.43331	0.142475	10.0601	8.29359e-24	7.56648e-23
RPS14	7537.4	2.18171	0.216889	10.0591	8.37253e-24	7.63446e-23
HCST	653.027	1.78231	0.177263	10.0546	8.764e-24	7.98297e-23
RCN1	513.364	1.41735	0.141098	10.0452	9.64674e-24	8.78241e-23
MORF4L2	841.779	1.44517	0.14395	10.0394	1.02306e-23	9.28944e-23
SPARC	612.761	3.22874	0.321667	10.0375	1.0426e-23	9.46188e-23
RRAGD	540.986	1.72784	0.172177	10.0352	1.06696e-23	9.67783e-23
FANCI	1158.78	1.51342	0.150943	10.0265	1.16633e-23	1.05625e-22
ADRM1	575.335	1.77494	0.17722	10.0154	1.30387e-23	1.17833e-22
NAA10	366.392	1.4749	0.147272	10.0148	1.31289e-23	1.18586e-22
GSDMD	1355.3	1.45067	0.144879	10.013	1.33699e-23	1.20511e-22
UTY	648.042	-2.34233	0.234067	-10.0071	1.41811e-23	1.27489e-22
ADRB2	310.157	1.31877	0.131843	10.0026	1.48464e-23	1.33401e-22
ZFP30	362.843	-1.64774	0.1649	-9.99232	1.64689e-23	1.47672e-22
ABCB10	1396.09	1.90654	0.190958	9.98405	1.79009e-23	1.6018e-22
METTL7A	1559.15	1.46239	0.146552	9.97864	1.89041e-23	1.6898e-22
THOC6	301.931	1.68052	0.168503	9.97322	1.99649e-23	1.78278e-22
COMT	1483.97	2.09278	0.209928	9.96905	2.08215e-23	1.85543e-22
RPL35A	3143.81	2.16958	0.217645	9.96845	2.09476e-23	1.8657e-22
HAL	424.648	1.48306	0.148871	9.96203	2.23458e-23	1.98613e-22
ICOSLG	496.621	-1.4407	0.144647	-9.96008	2.27881e-23	2.02439e-22
NDUFA10	1198.12	1.27907	0.128443	9.95829	2.32031e-23	2.0602e-22
ALDOA	4603.12	1.522	0.152914	9.95329	2.43989e-23	2.16303e-22
PKP4	531.141	1.45257	0.145984	9.95018	2.51732e-23	2.23053e-22
KLF7	465.446	-1.35636	0.136351	-9.94757	2.58421e-23	2.28511e-22
RGPD5	611.625	-2.03678	0.204932	-9.93885	2.82067e-23	2.48909e-22
IGF1R	1037.16	-2.21253	0.222652	-9.93719	2.86801e-23	2.52699e-22
ZNF814	360.506	-2.08273	0.209614	-9.93602	2.90178e-23	2.55544e-22
SFXN1	488.75	1.40945	0.141875	9.93444	2.94818e-23	2.59497e-22
LRRC45	488.32	1.87052	0.188297	9.93389	2.96458e-23	2.60674e-22
TMEM127	1067.77	-1.18703	0.119515	-9.93209	3.01858e-23	2.65287e-22
ARID4B	1706.88	-1.34913	0.135894	-9.92782	3.1507e-23	2.76476e-22
BICD2	1388.2	1.02878	0.103651	9.92539	3.22847e-23	2.83156e-22
ELMSAN1	2345.36	-1.07646	0.10868	-9.90488	3.96463e-23	3.47192e-22
AGTRAP	468.978	1.42073	0.143464	9.90303	4.03853e-23	3.53484e-22
RALGAPA1	1028.27	-1.83454	0.185253	-9.90289	4.04403e-23	3.53786e-22
C20orf27	695.548	2.32449	0.234753	9.90186	4.08595e-23	3.5691e-22
FTH1	4895.91	-1.08561	0.109676	-9.89833	4.23271e-23	3.69169e-22
TNRC18	9619.83	-1.38112	0.139654	-9.8896	4.61887e-23	4.01832e-22
HP1BP3	4656	0.943443	0.0954037	9.88895	4.64863e-23	4.04218e-22
ZNF677	381.667	-2.01796	0.20422	-9.88129	5.01845e-23	4.35716e-22
PSMD14	375.216	1.68361	0.170467	9.87646	5.26612e-23	4.56759e-22
MT-CYB	57624.8	-2.82386	0.286145	-9.86863	5.69386e-23	4.92867e-22
CFLAR	4379.75	-0.659741	0.0668607	-9.8674	5.76397e-23	4.98686e-22
DNAJB11	925.192	1.41493	0.14363	9.85127	6.76864e-23	5.83267e-22
CCNL2	2983.25	-0.870556	0.0884561	-9.84167	7.44624e-23	6.41016e-22
GID8	419.572	0.939356	0.0954578	9.84054	7.53055e-23	6.47627e-22
BOP1	656.593	1.94279	0.197471	9.83833	7.69811e-23	6.61378e-22
SEPT6	9212.53	1.63624	0.166365	9.83527	7.93563e-23	6.81445e-22
TCEB1	435.674	1.31372	0.133682	9.82721	8.59645e-23	7.37455e-22
SYNJ2	744.214	-1.14637	0.116906	-9.80589	1.06209e-22	9.07066e-22
IKBKE	970.772	1.31467	0.13412	9.8022	1.10162e-22	9.40355e-22
BSG	2580.22	1.75812	0.179461	9.79664	1.16396e-22	9.9112e-22
CLN3	912.057	-1.28415	0.131165	-9.79038	1.23834e-22	1.05393e-21
STX16	1886.66	-0.869642	0.0889139	-9.78072	1.36244e-22	1.15784e-21
PFAS	1805.04	1.06295	0.108702	9.77859	1.39135e-22	1.18124e-21
RASSF2	2354.99	0.747388	0.0764326	9.77839	1.39406e-22	1.18238e-21
NETO2	413.522	2.27381	0.232598	9.77571	1.4315e-22	1.21354e-21
MKRN2	311.357	1.39338	0.142556	9.77431	1.45146e-22	1.22925e-21
TEX10	505.007	1.51069	0.154599	9.77166	1.48989e-22	1.26118e-21
YTHDF2	639.569	1.25193	0.128134	9.77046	1.50764e-22	1.27558e-21
SCAMP4	518.143	-1.99224	0.204251	-9.75386	1.77577e-22	1.50023e-21
IL1B	491.57	-2.15782	0.221234	-9.75358	1.78083e-22	1.50376e-21
KLF3	1358.81	-1.45651	0.149395	-9.74939	1.85584e-22	1.5648e-21
EDEM2	519.164	1.23859	0.127088	9.74595	1.91982e-22	1.61717e-21
RSU1	610.534	0.92669	0.0950998	9.7444	1.94935e-22	1.64044e-21
KIF11	831.407	2.63847	0.270798	9.74334	1.96974e-22	1.65679e-21
SECISBP2L	609.57	-1.5604	0.16023	-9.73849	2.06592e-22	1.73346e-21
POLA2	688.247	1.5489	0.15906	9.73783	2.07953e-22	1.74404e-21
ZNF212	395.042	-1.59326	0.163647	-9.73592	2.11886e-22	1.77615e-21
DHFR	944.634	3.37631	0.347078	9.7278	2.29511e-22	1.91923e-21
BCAP31	762.763	1.67004	0.171684	9.72743	2.3035e-22	1.92532e-21
KLHL24	1114.87	-1.13256	0.11644	-9.72656	2.32323e-22	1.93993e-21
RPL22	3223.15	2.05708	0.211498	9.72623	2.3308e-22	1.9453e-21
IRF2BP2	4698.17	1.48106	0.152294	9.725	2.359e-22	1.96694e-21
PRMT5	407.098	1.90423	0.195861	9.72235	2.42117e-22	2.0178e-21
ACLY	1686.37	1.20628	0.124106	9.71975	2.48379e-22	2.06898e-21
XRN2	1208.09	1.11779	0.115029	9.71744	2.54086e-22	2.11448e-21
RPL36	4055.07	2.47976	0.255405	9.70915	2.75637e-22	2.29161e-21
ARPC5	1390.53	1.02412	0.105536	9.70399	2.89942e-22	2.40822e-21
SSNA1	300.857	1.91471	0.197343	9.7024	2.94482e-22	2.44475e-21
CTSA	1784.37	0.910619	0.0938854	9.69926	3.03684e-22	2.51994e-21
PCSK7	2721.33	-1.0381	0.107035	-9.69865	3.05528e-22	2.53401e-21
CRY2	464.623	-1.17275	0.120996	-9.69252	3.2443e-22	2.6882e-21
KDM1A	1344.84	1.4935	0.15422	9.68417	3.52049e-22	2.91145e-21
CCDC127	320.893	-2.35632	0.243543	-9.67519	3.8438e-22	3.17426e-21
TSPAN3	550.788	1.85715	0.191967	9.67429	3.87766e-22	3.2007e-21
CTD-2547E10.2	5022.94	-1.46818	0.151778	-9.67321	3.91876e-22	3.23153e-21
MDH1	632.896	1.76218	0.182213	9.67098	4.00528e-22	3.30129e-21
NAGA	901.513	1.01389	0.104891	9.66614	4.19936e-22	3.45796e-21
NCF1	839.044	-1.56587	0.162004	-9.66559	4.22197e-22	3.47491e-21
AC239811.2	1245.73	-1.54092	0.159583	-9.65594	4.63871e-22	3.81064e-21
KLRD1	452.133	-2.65938	0.275628	-9.64842	4.99195e-22	4.09302e-21
KDM2A	2568.94	-1.06506	0.110427	-9.64493	5.1646e-22	4.23257e-21
MGEA5	3304.79	-1.6348	0.169532	-9.64302	5.2615e-22	4.30788e-21
RAD18	302.539	1.90452	0.197652	9.63574	5.64814e-22	4.62006e-21
MT-ND4	58978	-2.90624	0.301622	-9.63538	5.6681e-22	4.63419e-21
CERCAM	478.998	-2.1784	0.226101	-9.63467	5.70764e-22	4.6643e-21
RNF144A	628.541	1.09732	0.113973	9.6279	6.09635e-22	4.9796e-21
MTHFD1L	431.137	1.86262	0.193529	9.62448	6.3024e-22	5.14303e-21
UBE2Q2P6	3115.28	2.15595	0.224037	9.62315	6.38436e-22	5.20745e-21
ZNF281	318.971	1.36579	0.141958	9.62106	6.51552e-22	5.31192e-21
PIGT	496.808	1.46365	0.152272	9.61209	7.1088e-22	5.78739e-21
MYBBP1A	1348.45	1.03395	0.107569	9.61195	7.11876e-22	5.79277e-21
ATP5I	422.652	2.00952	0.209069	9.61172	7.13503e-22	5.80327e-21
KBTBD2	675.12	-1.68897	0.175764	-9.60929	7.30534e-22	5.93619e-21
SPNS3	2387.91	2.15482	0.224292	9.60722	7.45366e-22	6.05386e-21
RAB34	537.573	1.03167	0.107404	9.60557	7.5741e-22	6.14589e-21
BCAS3	592.639	-1.78539	0.185931	-9.6024	7.81044e-22	6.3317e-21
NHP2L1	414.605	1.7206	0.17925	9.59892	8.07874e-22	6.54613e-21
RPS25	4391.29	2.3854	0.24861	9.59497	8.39396e-22	6.79836e-21
XRCC5	2513.43	1.53882	0.160392	9.59413	8.46294e-22	6.84458e-21
RPL41	7332.35	2.24155	0.233735	9.59016	8.79493e-22	7.10309e-21
MYL6	3712.22	1.47527	0.153966	9.58178	9.53864e-22	7.69653e-21
SLC26A2	409.823	1.41639	0.147881	9.57791	9.90314e-22	7.97943e-21
RBM3	2104.45	1.54849	0.16169	9.57688	1.00022e-21	8.05547e-21
LARS	2560.44	1.46181	0.152659	9.57566	1.01213e-21	8.1438e-21
DTX2	402.099	-1.24498	0.130111	-9.56856	1.08409e-21	8.71871e-21
CRTC3	517.136	-1.28906	0.134723	-9.56818	1.08802e-21	8.74624e-21
ZFAND3	473.722	-1.4089	0.147283	-9.56595	1.11175e-21	8.93282e-21
DYNC1LI2	1404.51	-0.881509	0.0921876	-9.56213	1.15359e-21	9.26471e-21
P4HB	3532.25	1.37092	0.14339	9.5608	1.16845e-21	9.37537e-21
NDUFS2	729.203	0.617829	0.0646256	9.56014	1.17599e-21	9.43147e-21
ZC3H7B	1468.6	1.21157	0.126761	9.55795	1.20111e-21	9.62392e-21
ARHGAP11A	815.534	1.88951	0.197702	9.55739	1.20769e-21	9.67221e-21
STT3A	895.77	1.79837	0.188185	9.55638	1.21951e-21	9.76234e-21
SRI	325.944	1.31725	0.137921	9.55079	1.28707e-21	1.02936e-20
CDC37	1947.63	0.984408	0.103239	9.53526	1.49504e-21	1.19292e-20
EIF3C	4690.77	1.3375	0.140302	9.53297	1.52845e-21	1.21901e-20
HBG1	2113.23	11.5683	1.21369	9.53148	1.55052e-21	1.23604e-20
SAMD4B	1111.47	-1.35666	0.142421	-9.52571	1.6391e-21	1.30605e-20
CHID1	618.443	1.55854	0.16382	9.51371	1.83987e-21	1.4613e-20
ZNF692	670.187	1.43714	0.151104	9.51092	1.88988e-21	1.49964e-20
TCP11L2	522.188	-2.05364	0.215963	-9.50922	1.92102e-21	1.52365e-20
VTA1	379.09	1.73065	0.18201	9.50857	1.93297e-21	1.53242e-20
DYNLL2	445.209	1.06467	0.112035	9.503	2.03919e-21	1.61367e-20
MORC4	1197.75	-1.88824	0.198772	-9.49953	2.10838e-21	1.66688e-20
DDHD1	1149.5	-1.50371	0.158312	-9.4984	2.13139e-21	1.68353e-20
IQGAP3	1071.27	1.22055	0.128522	9.49679	2.16451e-21	1.70891e-20
SEC23B	753.604	1.15576	0.121754	9.4926	2.25342e-21	1.77748e-20
FRK	1372.58	-2.51409	0.265023	-9.48631	2.39348e-21	1.88451e-20
HS3ST3B1	309.942	1.95997	0.206652	9.48441	2.43756e-21	1.91834e-20
RCC2	3736.69	1.50171	0.158358	9.48302	2.47022e-21	1.94227e-20
ANXA2R	390.742	1.25444	0.132366	9.47702	2.61656e-21	2.05546e-20
ACBD6	710.631	1.29385	0.136634	9.46948	2.81252e-21	2.20238e-20
NOL12	469.682	1.06114	0.112072	9.4683	2.84425e-21	2.22419e-20
FLT3	2556.46	1.6294	0.172124	9.46647	2.89472e-21	2.26263e-20
ZBTB25	702.939	-1.33929	0.141517	-9.46381	2.96926e-21	2.31984e-20
RPL23A	2769.11	2.03945	0.21552	9.46294	2.99418e-21	2.33825e-20
ARHGEF10L	343.935	-2.20909	0.2335	-9.46076	3.05708e-21	2.38539e-20
MIF	707.29	3.67088	0.38836	9.45225	3.31629e-21	2.58278e-20
IKBIP	367.532	1.73955	0.184048	9.45161	3.33656e-21	2.5974e-20
MRFAP1	1203.79	1.20324	0.127389	9.44537	3.54152e-21	2.75447e-20
NEGR1	778.305	-2.01117	0.212935	-9.445	3.5539e-21	2.76284e-20
SERPINB6	733.865	1.3514	0.143148	9.44057	3.70767e-21	2.8772e-20
CHML	325.735	1.21898	0.129131	9.4398	3.73475e-21	2.89691e-20
SMARCB1	543.412	1.06536	0.112969	9.43059	4.07782e-21	3.15734e-20
MT-CO1	213617	-2.00564	0.212864	-9.42216	4.41888e-21	3.41528e-20
NANS	517.91	1.16524	0.123679	9.42149	4.44746e-21	3.43582e-20
HIST1H3H	2048.55	3.03262	0.322012	9.41773	4.60957e-21	3.55469e-20
FTSJ3	611.884	1.11577	0.118485	9.41697	4.64311e-21	3.57895e-20
AP2M1	1324.93	1.2036	0.127815	9.41668	4.65574e-21	3.58708e-20
HIGD2A	370.648	1.40612	0.1494	9.41177	4.87863e-21	3.75378e-20
APEH	1049.64	1.68423	0.178978	9.41025	4.94977e-21	3.80682e-20
TERF2	526.27	-1.66375	0.176829	-9.40882	5.0172e-21	3.8556e-20
GPATCH8	1114.79	-1.68937	0.17957	-9.40789	5.06194e-21	3.88615e-20
ETHE1	448.617	1.92325	0.204532	9.40319	5.29336e-21	4.0584e-20
TMEM14C	387.841	1.59279	0.169392	9.40296	5.30478e-21	4.06535e-20
SMARCC2	2006.38	-1.10832	0.11802	-9.39096	5.94578e-21	4.54849e-20
RER1	898.743	1.44164	0.153523	9.39036	5.97974e-21	4.57245e-20
SNX17	821.036	1.04026	0.110855	9.38395	6.35452e-21	4.84613e-20
CCT8	999.585	1.57451	0.16779	9.38383	6.36211e-21	4.84977e-20
RCCD1	420.122	2.24991	0.239966	9.37595	6.85582e-21	5.2192e-20
SF3A3	1207.43	1.61712	0.17256	9.37134	7.16162e-21	5.44479e-20
DIAPH1	2813.83	-1.36397	0.145551	-9.37112	7.17665e-21	5.45381e-20
ENSA	1441.16	1.21206	0.129413	9.36582	7.546e-21	5.72944e-20
COPS5	645.587	1.32128	0.141228	9.35568	8.30668e-21	6.29868e-20
EIF3M	1578.71	1.84712	0.197456	9.35459	8.39247e-21	6.35814e-20
RBBP7	1279.82	1.53968	0.164661	9.35061	8.71439e-21	6.59624e-20
RFC2	360.704	1.25835	0.134597	9.34905	8.84368e-21	6.69116e-20
TUBA4A	369.315	1.97823	0.211628	9.3477	8.95764e-21	6.77144e-20
ACO2	964.531	0.80643	0.0862736	9.34735	8.98675e-21	6.79047e-20
PDIA5	487.165	2.11702	0.226493	9.34696	9.02007e-21	6.80968e-20
ATP5H	641.092	1.82014	0.194867	9.34042	9.59568e-21	7.23157e-20
SLC6A6	930.419	-1.34822	0.14436	-9.33931	9.69678e-21	7.30457e-20
DMXL2	2268.66	-1.66882	0.178715	-9.33786	9.83003e-21	7.40171e-20
RANBP6	376.742	1.21878	0.130553	9.33555	1.0047e-20	7.5618e-20
ARHGAP17	887.675	-1.38545	0.148487	-9.33042	1.05453e-20	7.92642e-20
PRKAG2	399.222	-1.25242	0.13425	-9.32899	1.06883e-20	8.03045e-20
TCOF1	1380.32	0.904739	0.0970502	9.32238	1.13763e-20	8.5362e-20
SETD1B	1282.7	-1.77782	0.19077	-9.31921	1.17205e-20	8.78684e-20
NUDCD2	301.405	1.97598	0.21206	9.31802	1.18533e-20	8.87867e-20
MRFAP1L1	490.498	1.45838	0.156578	9.31407	1.2303e-20	9.2075e-20
ARHGEF7	1092.29	-0.837964	0.0899929	-9.31145	1.26105e-20	9.42943e-20
SDHB	315.101	1.52904	0.164248	9.3093	1.28679e-20	9.6136e-20
KMT2A	2767.17	-1.28075	0.137596	-9.30806	1.30187e-20	9.722e-20
GPR132	335.45	-1.58327	0.170139	-9.30571	1.33105e-20	9.93565e-20
R3HDM2	882.179	-1.65346	0.177756	-9.30187	1.37991e-20	1.02825e-19
ME3	729.321	1.88365	0.202565	9.29895	1.41842e-20	1.05604e-19
RPS2P46	1288.14	2.40108	0.258221	9.29852	1.42412e-20	1.05982e-19
ST3GAL4	438.078	1.19838	0.128914	9.29596	1.45885e-20	1.0852e-19
MID1IP1	785.793	1.73465	0.186631	9.29457	1.47796e-20	1.09852e-19
NARS2	572.518	1.52638	0.164289	9.29084	1.53072e-20	1.13719e-19
C7orf73	533.069	0.999684	0.10764	9.28728	1.58279e-20	1.17486e-19
LRRC37A2	411.575	-1.71298	0.18455	-9.28193	1.66441e-20	1.23385e-19
CIITA	4164.33	-1.67007	0.179976	-9.27937	1.70482e-20	1.26273e-19
RAB11A	652.499	1.32191	0.142495	9.2769	1.74484e-20	1.29181e-19
SETD3	754.897	1.13666	0.122571	9.27352	1.80103e-20	1.33227e-19
TMA7	748.32	1.95255	0.210766	9.26404	1.96837e-20	1.45294e-19
FOXRED1	390.212	1.23435	0.133249	9.26349	1.97852e-20	1.45981e-19
BLM	488.161	1.76016	0.190114	9.25843	2.07464e-20	1.52876e-19
ZNF609	2280.5	-1.03861	0.112226	-9.25466	2.14921e-20	1.58303e-19
BMS1	1144.48	1.13536	0.12273	9.25083	2.2276e-20	1.63938e-19
NPEPPS	1300.78	-1.10833	0.119851	-9.24759	2.29619e-20	1.68841e-19
ARFIP2	381.231	0.869382	0.0940244	9.24634	2.32315e-20	1.70677e-19
BMS1P2	307.056	-1.35403	0.146464	-9.2448	2.35686e-20	1.73007e-19
MECOM	1154.58	-3.50346	0.379206	-9.23896	2.48912e-20	1.8256e-19
HNRNPR	1469.54	1.48686	0.160978	9.2364	2.54921e-20	1.86888e-19
TAF7	904.547	1.33566	0.144649	9.23383	2.61132e-20	1.91257e-19
TSPYL4	345.498	1.16577	0.12625	9.23379	2.61214e-20	1.91257e-19
MAPRE1	781.646	0.716645	0.0776501	9.22916	2.72773e-20	1.99636e-19
H2AFX	810.166	2.86661	0.310672	9.22711	2.78035e-20	2.03401e-19
TRAF3IP2	443.349	0.999577	0.10834	9.22631	2.80125e-20	2.04843e-19
SMARCE1	881.405	1.26194	0.136852	9.22121	2.93761e-20	2.1445e-19
SMAD3	463.718	-1.85198	0.200919	-9.21754	3.03985e-20	2.21539e-19
ERCC2	369.751	1.68458	0.18297	9.20686	3.35806e-20	2.4442e-19
RPL37A	9100.84	2.46167	0.267441	9.20453	3.43176e-20	2.49573e-19
EIF2S1	490.633	2.04603	0.222335	9.20245	3.49891e-20	2.5435e-19
ATP9B	1935.48	-1.56676	0.170304	-9.19978	3.58689e-20	2.60636e-19
RNASEH2C	516.617	2.45465	0.266941	9.1955	3.73268e-20	2.70886e-19
TSR1	708.147	1.28378	0.13962	9.19482	3.75631e-20	2.72486e-19
SMU1	980.721	1.27521	0.138756	9.19034	3.91608e-20	2.83599e-19
SLC5A6	365.575	1.4396	0.156904	9.17503	4.51436e-20	3.26241e-19
UTP18	694.953	1.37172	0.149509	9.17483	4.52273e-20	3.26709e-19
IQSEC1	651.548	-2.1998	0.239917	-9.169	4.77415e-20	3.4415e-19
GATC	302.97	0.945738	0.103207	9.1635	5.02388e-20	3.61396e-19
AHSA1	586.166	1.15382	0.125948	9.1611	5.13715e-20	3.69083e-19
MDM4	3280.95	-1.57007	0.171409	-9.15975	5.20176e-20	3.73569e-19
RPL41P1	2367.99	1.50673	0.164622	9.15269	5.55352e-20	3.98499e-19
TERF2IP	684.517	0.938115	0.10251	9.15142	5.6188e-20	4.03015e-19
NUCKS1	1937.74	2.05174	0.224266	9.14868	5.76329e-20	4.13036e-19
MARCKSL1	556.05	1.70595	0.186604	9.14207	6.12697e-20	4.38553e-19
DGKD	2493.82	-1.61194	0.176378	-9.13911	6.29656e-20	4.50505e-19
TXNRD1	926.172	1.43412	0.156931	9.13856	6.32921e-20	4.52653e-19
COX5B	536.342	1.79721	0.196742	9.13487	6.54839e-20	4.67746e-19
ZNF407	860.114	-0.739988	0.0810246	-9.13288	6.67038e-20	4.76262e-19
GNA15	2531.63	1.37464	0.150533	9.13182	6.73552e-20	4.80516e-19
TDP1	376.334	1.40672	0.154112	9.12791	6.98324e-20	4.97982e-19
ZNF606	318.954	-1.48822	0.163046	-9.12756	7.00573e-20	4.99379e-19
NACA	3812.84	1.89622	0.207898	9.12093	7.44852e-20	5.30503e-19
CLINT1	1692.55	0.818513	0.0897533	9.11958	7.54139e-20	5.36896e-19
FYTTD1	839.984	1.05557	0.115813	9.11443	7.90853e-20	5.62802e-19
FAM46C	2190.96	0.939744	0.103139	9.11144	8.12949e-20	5.77334e-19
FAM168B	695.323	1.33576	0.146635	9.10947	8.27818e-20	5.87652e-19
AFF4	1308.17	-1.37389	0.150862	-9.10693	8.47489e-20	6.00627e-19
CYCS	762.98	1.9165	0.210484	9.10518	8.61226e-20	6.10112e-19
UGP2	720.849	1.69239	0.185944	9.10158	8.90303e-20	6.30193e-19
FITM2	309.274	-1.42255	0.156422	-9.09429	9.5206e-20	6.7363e-19
SKIL	359.2	-1.7285	0.190234	-9.08621	1.02556e-19	7.2415e-19
USP3	974.54	-1.39429	0.153478	-9.08462	1.04062e-19	7.34482e-19
WDR46	493.144	1.7675	0.194621	9.08176	1.06829e-19	7.53706e-19
AL590867.1	698.431	-2.27673	0.250705	-9.08133	1.07258e-19	7.56424e-19
SLC35C2	648.197	1.16288	0.128074	9.07971	1.08862e-19	7.67416e-19
MYL12A	1197.3	0.978344	0.107779	9.07734	1.11262e-19	7.83698e-19
CELF1	1822.22	-1.56725	0.172677	-9.0762	1.12427e-19	7.91254e-19
USP4	1885.28	-1.43727	0.158382	-9.07466	1.14034e-19	8.02237e-19
HMBS	1227.84	1.87136	0.206297	9.07121	1.17699e-19	8.27347e-19
GSK3B	994.668	-1.2622	0.139407	-9.05403	1.37792e-19	9.64657e-19
SF1	3261.66	-0.951409	0.10511	-9.05151	1.41006e-19	9.86757e-19
ERP44	388.242	1.00995	0.111635	9.04688	1.47106e-19	1.02819e-18
PBX3	740.103	-1.5371	0.169911	-9.04651	1.47604e-19	1.03126e-18
PPP1CC	1111.44	1.4203	0.157004	9.04631	1.47887e-19	1.0324e-18
OGT	5911.65	-0.906862	0.100289	-9.04252	1.53107e-19	1.06797e-18
NEDD8	703.101	1.51381	0.167447	9.04054	1.559e-19	1.08701e-18
BAG5	446.521	0.903527	0.0999617	9.03873	1.58498e-19	1.10424e-18
FBRS	1160.12	-1.42227	0.157416	-9.0351	1.63845e-19	1.14103e-18
RPUSD3	364.377	1.16501	0.128979	9.03251	1.6778e-19	1.16749e-18
PIN1	619.007	1.74967	0.193834	9.02667	1.76983e-19	1.23003e-18
MICAL3	806.198	-1.44211	0.15978	-9.02557	1.7876e-19	1.24139e-18
RUVBL2	863.865	1.26489	0.140158	9.02478	1.80054e-19	1.24936e-18
SMARCAL1	430.599	-1.32256	0.146657	-9.01808	1.91415e-19	1.32606e-18
RPL36A	3482.56	2.14407	0.237755	9.01799	1.91571e-19	1.32661e-18
CAND1	1302.86	1.50133	0.166632	9.00985	2.06341e-19	1.42832e-18
RPL34	2949.17	2.01367	0.223506	9.00948	2.07028e-19	1.4325e-18
REPIN1	1652.04	1.54044	0.171015	9.00763	2.10555e-19	1.45632e-18
LZTS2	615.168	1.66296	0.184646	9.0062	2.13324e-19	1.47488e-18
AMOTL1	328.429	1.16774	0.129684	9.00457	2.16522e-19	1.49639e-18
PSMD13	900.975	1.18417	0.131526	9.00329	2.19051e-19	1.51326e-18
MZT2A	608.256	2.00209	0.222388	9.00269	2.20259e-19	1.52038e-18
PLEKHJ1	510.273	1.30956	0.145475	9.002	2.21635e-19	1.52927e-18
LY75	1344.07	1.18742	0.131924	9.00075	2.24179e-19	1.54559e-18
DOT1L	2073.1	-1.26211	0.140233	-9.00007	2.25578e-19	1.55399e-18
ARAP1	2530.13	-1.40347	0.155985	-8.99747	2.30984e-19	1.58933e-18
KIAA0430	1136.55	-1.86746	0.207682	-8.99191	2.4296e-19	1.6704e-18
ABCC1	3094.87	-0.901835	0.100363	-8.98577	2.56927e-19	1.76432e-18
RAB1B	491.216	0.898321	0.099973	8.98564	2.57232e-19	1.7657e-18
GPS1	675.806	1.68184	0.187224	8.98304	2.6339e-19	1.80726e-18
BZRAP1	2528.84	1.21993	0.135819	8.98204	2.65782e-19	1.82294e-18
ETFB	659.125	1.09492	0.121907	8.98159	2.66882e-19	1.82976e-18
JTB	698.756	1.84641	0.205581	8.98144	2.67251e-19	1.83156e-18
C6orf89	668.523	1.04881	0.116836	8.97677	2.78826e-19	1.90862e-18
PAICS	893.698	1.2519	0.139508	8.97369	2.86732e-19	1.96043e-18
UGGT1	2952.4	1.02763	0.114516	8.97369	2.86737e-19	1.96043e-18
RBM33	2197.42	-0.72521	0.0808481	-8.97003	2.96421e-19	2.02503e-18
FAM214B	477.032	-1.4461	0.16131	-8.96476	3.10968e-19	2.12273e-18
TMEM45A	2959.59	-2.27474	0.25379	-8.96307	3.15771e-19	2.15467e-18
DAAM1	422.59	-2.32638	0.259555	-8.96295	3.16116e-19	2.15617e-18
SLC43A3	966.342	1.31364	0.146593	8.96115	3.21308e-19	2.19071e-18
BTF3L4	402.95	1.28196	0.143152	8.95526	3.38942e-19	2.30547e-18
RFX2	440.79	-1.45438	0.162444	-8.95312	3.45582e-19	2.34879e-18
UFD1L	564.936	0.979389	0.109492	8.94481	3.72607e-19	2.52847e-18
C10orf11	550.474	-1.50524	0.168347	-8.94131	3.84595e-19	2.60777e-18
ARCN1	755.811	1.26954	0.142006	8.94008	3.88883e-19	2.63581e-18
CDT1	998.705	2.28139	0.25519	8.93997	3.89278e-19	2.63745e-18
SURF4	1373.82	1.75285	0.196125	8.9374	3.98444e-19	2.6985e-18
HELZ	1431.35	-1.03477	0.115793	-8.93642	4.01987e-19	2.72035e-18
ABCB7	314.45	1.10016	0.123132	8.93484	4.07766e-19	2.75838e-18
TOPORS	466.94	1.30572	0.146141	8.93465	4.08457e-19	2.76197e-18
DRG1	330.446	1.6452	0.184265	8.92845	4.32029e-19	2.91907e-18
AAMP	751.182	1.10888	0.124211	8.92739	4.36161e-19	2.94584e-18
FAM60A	885.499	1.72844	0.193785	8.91939	4.68872e-19	3.16181e-18
SLC27A1	706.726	-1.12712	0.126408	-8.9165	4.81247e-19	3.24273e-18
ZBTB20	367.08	-1.77267	0.198817	-8.91606	4.83169e-19	3.25441e-18
ARF1	1994.49	0.963517	0.108123	8.91133	5.04225e-19	3.39358e-18
GOT2	352.842	1.05047	0.117921	8.90826	5.18414e-19	3.48771e-18
GNAI3	801.733	1.01953	0.114485	8.90534	5.3223e-19	3.57787e-18
GNB5	562.566	-1.09821	0.123324	-8.90512	5.33275e-19	3.5835e-18
DR1	968.257	1.11584	0.125334	8.90299	5.43642e-19	3.65174e-18
MT-ND2	39045.9	-2.7401	0.307777	-8.90288	5.4418e-19	3.65393e-18
SPIN1	560.496	1.44144	0.161987	8.8985	5.6606e-19	3.79937e-18
ARRB2	1696.55	-0.88767	0.0997817	-8.89612	5.78347e-19	3.88032e-18
LMAN1	840.583	1.62319	0.182619	8.88839	6.19988e-19	4.15809e-18
GOLIM4	953.701	1.31558	0.148059	8.88553	6.36149e-19	4.26316e-18
ASUN	320.066	2.17793	0.245117	8.88525	6.3776e-19	4.2723e-18
AAAS	471.786	1.21323	0.136549	8.88492	6.39696e-19	4.28361e-18
KIAA0556	699.918	-1.10197	0.124036	-8.88426	6.43455e-19	4.3071e-18
BAZ2B	2151.62	-1.38901	0.156421	-8.87998	6.68737e-19	4.46939e-18
RBFA	353.907	1.029	0.115892	8.87899	6.74675e-19	4.50733e-18
SH3GL1	656.197	-1.55369	0.175096	-8.87334	7.09814e-19	4.74025e-18
GNL3	751.737	1.05127	0.118513	8.87044	7.28582e-19	4.86182e-18
ZMIZ1	2550.24	-2.59219	0.292329	-8.86735	7.49069e-19	4.99466e-18
ZNF367	457.216	1.77004	0.199782	8.85986	8.0117e-19	5.33794e-18
SNRPG	309.065	2.3963	0.27063	8.85453	8.40354e-19	5.59684e-18
CPEB4	1061.77	-1.42503	0.161006	-8.85078	8.69064e-19	5.78135e-18
AIP	455.599	1.16827	0.132037	8.84807	8.90445e-19	5.9213e-18
E2F4	972.458	1.21483	0.137385	8.84256	9.35511e-19	6.2114e-18
GBP2	571.732	-1.09863	0.124258	-8.84151	9.44329e-19	6.26513e-18
NOSIP	392.376	1.29452	0.146523	8.83493	1.00164e-18	6.64027e-18
TMEM18	387.535	1.42519	0.161327	8.83418	1.00832e-18	6.68197e-18
FAM46A	1772.94	1.55639	0.17621	8.83262	1.02251e-18	6.77336e-18
RPL31	5294.37	1.80047	0.203853	8.8322	1.02634e-18	6.79613e-18
SLC11A2	874.381	-1.45132	0.164342	-8.83112	1.03636e-18	6.85985e-18
PAPSS1	583.548	1.44029	0.163113	8.83003	1.04643e-18	6.92389e-18
BTBD11	653.502	-2.1926	0.248336	-8.82918	1.05443e-18	6.97411e-18
CD63	880.698	1.18426	0.134149	8.82795	1.06609e-18	7.04851e-18
CREBRF	670.704	-1.21893	0.138148	-8.82335	1.11081e-18	7.34139e-18
UBAC1	1045.67	1.48557	0.168412	8.82107	1.13373e-18	7.48712e-18
CKAP2	427.039	1.80356	0.204472	8.8206	1.13849e-18	7.51566e-18
MDH2	712.358	1.75089	0.198528	8.81934	1.15132e-18	7.59749e-18
CHMP2A	326.496	1.20374	0.136662	8.80822	1.27151e-18	8.36816e-18
MIPOL1	1891.18	-1.98664	0.225625	-8.80507	1.30773e-18	8.60325e-18
ARHGEF12	1950.15	-1.63816	0.186205	-8.79764	1.39724e-18	9.17461e-18
RAB11FIP4	557.359	-2.25477	0.256375	-8.79481	1.4329e-18	9.39451e-18
COX7C	824.704	2.12862	0.242094	8.79253	1.46231e-18	9.5764e-18
ETFA	642.58	1.34196	0.152631	8.79219	1.46668e-18	9.60135e-18
CAP1	2473.15	1.11556	0.126901	8.7908	1.48494e-18	9.70982e-18
DDX1	550.383	1.54505	0.175825	8.78746	1.52978e-18	9.99546e-18
CSF2RA	612.966	-1.47326	0.167897	-8.77478	1.71241e-18	1.11718e-17
FAM78A	975.97	1.01881	0.116158	8.77091	1.7723e-18	1.15494e-17
JDP2	605.335	1.93639	0.220832	8.76859	1.80917e-18	1.17808e-17
PSMA4	608.816	1.79467	0.204685	8.76799	1.81882e-18	1.18347e-17
BLOC1S1	361.43	1.7444	0.198998	8.76595	1.85208e-18	1.20466e-17
ZNF44	636.869	-0.9805	0.111931	-8.75984	1.95531e-18	1.26941e-17
SPAG9	2191.73	-1.60491	0.183239	-8.75857	1.97737e-18	1.28276e-17
POLR2E	466.779	0.925498	0.105692	8.75658	2.01263e-18	1.30514e-17
HOOK3	1311.94	-0.737798	0.0842598	-8.75623	2.01893e-18	1.30874e-17
PSMD8	576.293	1.1617	0.132692	8.75486	2.04361e-18	1.32424e-17
KIAA1683	423.957	-2.21855	0.253416	-8.75457	2.04882e-18	1.32712e-17
FAM32A	493.557	1.12643	0.128697	8.75259	2.08503e-18	1.35006e-17
SARS	640.491	0.942338	0.10769	8.75048	2.12441e-18	1.37453e-17
OLA1	496.284	1.68435	0.192684	8.74154	2.29964e-18	1.48623e-17
RPS13	2750.05	1.74029	0.199122	8.73984	2.33436e-18	1.50811e-17
PKMYT1	372.636	1.89719	0.217138	8.73724	2.38883e-18	1.54214e-17
LBR	1996.51	1.81022	0.207298	8.73249	2.49126e-18	1.60646e-17
ABCB6	403.93	1.56042	0.178715	8.73132	2.51728e-18	1.62263e-17
PSMA3	347.52	1.12124	0.128452	8.72891	2.57145e-18	1.65631e-17
POLA1	894.028	1.371	0.15708	8.72808	2.59033e-18	1.66785e-17
SERPINB9	370.328	-1.29162	0.148033	-8.72519	2.6573e-18	1.70906e-17
FGD4	322.243	-1.73851	0.199303	-8.72294	2.71078e-18	1.74216e-17
GNAS	4377.13	0.753028	0.0863335	8.72231	2.72572e-18	1.7511e-17
TIMM23	414.311	1.77374	0.203495	8.7164	2.87191e-18	1.84296e-17
GADD45B	504.8	-1.92909	0.221543	-8.70751	3.10636e-18	1.99045e-17
ADK	407.222	1.20227	0.13809	8.70642	3.13625e-18	2.00885e-17
VDAC1	793.541	1.34501	0.154503	8.70541	3.16423e-18	2.02527e-17
MYO1F	3727.7	-1.13806	0.130743	-8.70456	3.18821e-18	2.03911e-17
VTI1A	1217.56	-1.04223	0.119739	-8.70417	3.19917e-18	2.04536e-17
PHF6	435.033	1.38715	0.159415	8.70152	3.27458e-18	2.09202e-17
GLE1	615.197	1.46583	0.168503	8.69911	3.34502e-18	2.13307e-17
GRWD1	513.736	1.53074	0.176031	8.69584	3.44268e-18	2.19372e-17
PLAUR	479.944	-0.859061	0.0988214	-8.69307	3.52764e-18	2.24454e-17
FRAT1	607.039	1.85875	0.213924	8.68883	3.66176e-18	2.32559e-17
MIB1	1314.12	1.32949	0.153052	8.68651	3.73736e-18	2.37273e-17
ZNF333	586.948	-1.07259	0.123676	-8.67257	4.22487e-18	2.67142e-17
HLA-A	9780.11	0.986703	0.113793	8.67105	4.28148e-18	2.70522e-17
SELENBP1	660.761	1.71315	0.197577	8.6708	4.29085e-18	2.71015e-17
CCNH	801.221	0.805205	0.0929244	8.66516	4.50872e-18	2.84568e-17
ENG	546.915	-1.59154	0.183759	-8.66104	4.67498e-18	2.94845e-17
PDHX	434.608	-1.50396	0.173703	-8.65822	4.79204e-18	3.01897e-17
IFT81	335.276	-2.01685	0.232965	-8.65731	4.83031e-18	3.04086e-17
PELI2	407.701	-2.34702	0.271506	-8.64447	5.40569e-18	3.3944e-17
SLC25A38	313.895	1.2614	0.145926	8.64407	5.42455e-18	3.40501e-17
SLC25A37	4478.11	0.847857	0.0981178	8.64121	5.56195e-18	3.48872e-17
JMJD8	308.479	1.63035	0.188874	8.63193	6.03252e-18	3.77837e-17
NDEL1	803.683	-1.14991	0.133228	-8.63116	6.07308e-18	3.8024e-17
PSMD7	620.159	0.951414	0.110359	8.62105	6.63419e-18	4.14619e-17
C4orf3	406.526	1.6622	0.192838	8.61968	6.71418e-18	4.19314e-17
NASP	2261.23	1.41958	0.164809	8.61348	7.08766e-18	4.41998e-17
NCAPD3	1151.54	1.09351	0.12711	8.60285	7.77612e-18	4.84582e-17
DMTN	803.298	2.27374	0.264345	8.60139	7.87558e-18	4.90602e-17
HIST2H2BE	1791.95	1.50564	0.175102	8.59868	8.06388e-18	5.0215e-17
KIF23	398.648	1.22158	0.142109	8.59608	8.2483e-18	5.13264e-17
LRRC37A4P	3369.85	-1.05466	0.12276	-8.59121	8.60572e-18	5.35312e-17
SPATA13	854.789	-0.993083	0.115626	-8.58878	8.78999e-18	5.4638e-17
PRPF38A	756.727	1.16872	0.136083	8.58831	8.82586e-18	5.48412e-17
RPS6KA5	555.77	-1.66136	0.193468	-8.58728	8.90526e-18	5.53146e-17
SYNRG	961.1	-1.65954	0.193531	-8.57509	9.90105e-18	6.14114e-17
RPL26	5854.73	1.92232	0.224192	8.57442	9.95908e-18	6.1727e-17
TPM3	3885.71	1.08818	0.126913	8.5742	9.9777e-18	6.17979e-17
TNRC6B	2388.93	-1.2389	0.144537	-8.57155	1.02103e-17	6.32158e-17
E2F1	671.125	1.96427	0.229213	8.56963	1.0382e-17	6.42328e-17
RP11-307A17.2	334.547	-2.32515	0.271593	-8.56116	1.11734e-17	6.89805e-17
SH3TC1	1437.5	-1.77056	0.206818	-8.56096	1.11929e-17	6.9076e-17
STAG3L3	3291.29	-0.608679	0.0711874	-8.55037	1.22692e-17	7.56104e-17
UNC45A	732.555	0.713155	0.0834282	8.54812	1.25105e-17	7.707e-17
CD164	2291.21	1.05722	0.123758	8.54262	1.31211e-17	8.06873e-17
IFI30	1766.89	-1.33768	0.156613	-8.5413	1.3272e-17	8.15864e-17
RERE	1257.55	-1.62886	0.190714	-8.54085	1.33242e-17	8.1878e-17
GLRX	347.105	1.8012	0.211017	8.53581	1.39182e-17	8.54367e-17
RPL10	11461.9	1.77244	0.20769	8.53406	1.41296e-17	8.66728e-17
PEX6	648.104	1.91336	0.224234	8.53287	1.42767e-17	8.75437e-17
ZNF724P	313.929	-1.49625	0.175384	-8.53123	1.44799e-17	8.87265e-17
MZT2B	642.723	2.51423	0.294716	8.53102	1.45064e-17	8.88573e-17
EPRS	1123.01	1.93485	0.22682	8.53031	1.4595e-17	8.93686e-17
C15orf39	888.809	-2.94162	0.344976	-8.52701	1.50178e-17	9.1892e-17
MTPN	1261.3	0.924587	0.10844	8.52624	1.51182e-17	9.24734e-17
IMP4	486.616	1.39731	0.163921	8.52433	1.53691e-17	9.39752e-17
ABHD17B	551.987	1.61364	0.189356	8.52173	1.57185e-17	9.60091e-17
ANXA6	2160.99	1.12947	0.132716	8.51046	1.73245e-17	1.05594e-16
DYNLL1	534.413	1.94397	0.228716	8.49949	1.90426e-17	1.15943e-16
KIF14	337.127	1.96827	0.231637	8.49724	1.94155e-17	1.1813e-16
NFAT5	1164.5	-1.69845	0.200006	-8.49197	2.03162e-17	1.23567e-16
KLHL12	387.467	1.21989	0.143688	8.48983	2.06932e-17	1.25771e-16
SUB1	1209.21	1.65034	0.194495	8.48524	2.15278e-17	1.30614e-16
MOGS	947.949	1.48976	0.175578	8.48487	2.15953e-17	1.30977e-16
CRTC2	545.061	-1.83609	0.216522	-8.47991	2.25375e-17	1.36595e-16
GYPA	848.975	8.84864	1.04354	8.47944	2.26279e-17	1.37095e-16
DBI	742.608	1.35216	0.159484	8.47831	2.28491e-17	1.38338e-16
C1orf174	401.852	0.888707	0.10483	8.47762	2.2984e-17	1.39106e-16
ACSL5	577.937	1.19073	0.140458	8.47748	2.30116e-17	1.39224e-16
NEDD4	1086.29	-1.63828	0.193355	-8.47294	2.3928e-17	1.44566e-16
SLC35E3	610.087	-0.968515	0.114333	-8.471	2.43293e-17	1.46938e-16
DLST	1093.42	-1.23855	0.146248	-8.46887	2.47787e-17	1.496e-16
ARF5	573.502	0.911457	0.107685	8.46413	2.58077e-17	1.55595e-16
SNRPE	353.561	2.97735	0.351784	8.46355	2.59352e-17	1.56309e-16
MRPS22	307.982	1.1637	0.137527	8.46161	2.63702e-17	1.5882e-16
STK40	493.516	-1.13642	0.134307	-8.46134	2.64329e-17	1.59142e-16
BMS1P5	400.801	-1.54157	0.182298	-8.45634	2.75898e-17	1.65934e-16
GALC	527.076	-1.24328	0.147065	-8.45398	2.81537e-17	1.69207e-16
SMURF1	861.348	-1.15639	0.136964	-8.44305	3.0916e-17	1.85227e-16
TMED2	1190.84	1.4882	0.176283	8.44206	3.1179e-17	1.86726e-16
CD2BP2	696.521	1.2189	0.144407	8.44074	3.15327e-17	1.88725e-16
NAA50	909.536	1.14439	0.1357	8.43323	3.36266e-17	2.01188e-16
RBM28	1943.23	1.11803	0.132589	8.43225	3.39082e-17	2.02802e-16
CCPG1	1031.17	-0.931642	0.110526	-8.42919	3.48076e-17	2.07965e-16
HIST1H2AD	974.674	2.45421	0.291193	8.42811	3.51283e-17	2.09736e-16
ATP6V1G1	600.514	0.954219	0.113222	8.4279	3.51937e-17	2.10053e-16
CD93	2285.16	0.831586	0.0986879	8.42642	3.5639e-17	2.12638e-16
WRNIP1	1409.16	1.88908	0.224223	8.425	3.60753e-17	2.15167e-16
MYADM	1422.33	-1.57624	0.187169	-8.42152	3.71628e-17	2.21423e-16
NRAS	533.5	0.907504	0.107769	8.42083	3.73811e-17	2.2257e-16
PDPK1	969.972	-1.0601	0.125927	-8.41836	3.81782e-17	2.27159e-16
TBC1D17	532.753	-1.4968	0.177826	-8.4172	3.85581e-17	2.29108e-16
LENG8	3682.41	-1.8702	0.222272	-8.41399	3.9628e-17	2.35217e-16
KANSL3	1491.15	-1.16404	0.138366	-8.41274	4.00558e-17	2.37593e-16
ZNF440	552.86	-1.42905	0.169889	-8.41164	4.043e-17	2.3973e-16
NDUFA4	494.354	1.67418	0.199036	8.41146	4.04951e-17	2.40034e-16
SENP3	575.757	1.40611	0.16718	8.41072	4.07498e-17	2.41377e-16
ASCC3	1304.32	0.644727	0.0766935	8.40654	4.22272e-17	2.49871e-16
GYPB	306.655	7.32596	0.871645	8.40475	4.28771e-17	2.53629e-16
RPL30	5085.72	1.82182	0.216764	8.40461	4.29288e-17	2.53848e-16
DNM1P47	1227.51	-1.62302	0.193117	-8.40431	4.30381e-17	2.54408e-16
KIAA2013	687.646	1.53895	0.1832	8.40034	4.45174e-17	2.62971e-16
PRR11	357.015	1.18597	0.141185	8.4001	4.46083e-17	2.63418e-16
COL4A3BP	704.671	-0.930984	0.110833	-8.39989	4.46902e-17	2.63811e-16
DNMT3A	1465.87	0.883621	0.10521	8.3986	4.5183e-17	2.66586e-16
PDXDC2P	472.786	-1.623	0.193246	-8.39858	4.51911e-17	2.66586e-16
STUB1	507.869	1.47187	0.175273	8.3976	4.55683e-17	2.68719e-16
C12orf55	616.974	-1.85997	0.221575	-8.39432	4.68597e-17	2.76051e-16
CCDC9	617.517	-1.75596	0.209187	-8.39422	4.68978e-17	2.76181e-16
FARS2	330.951	1.07925	0.128595	8.3926	4.75493e-17	2.79827e-16
C14orf23	839.602	-2.39384	0.285296	-8.3907	4.83246e-17	2.84292e-16
RNF114	482.879	1.26404	0.150717	8.38686	4.99302e-17	2.93538e-16
CYTH4	876.252	-1.46958	0.175335	-8.38153	5.22425e-17	3.06713e-16
JMJD1C	3093.72	-1.59776	0.190631	-8.38145	5.22783e-17	3.06819e-16
COX15	331.813	1.05938	0.126488	8.37529	5.50861e-17	3.22968e-16
VDAC2	580.045	1.20448	0.143861	8.3725	5.64066e-17	3.30598e-16
SQRDL	557.651	1.24407	0.148639	8.36976	5.77356e-17	3.38157e-16
MINK1	1099.4	-1.14325	0.1366	-8.36936	5.79307e-17	3.39185e-16
CROCCP3	671.333	-2.26576	0.270775	-8.36767	5.87689e-17	3.43859e-16
SLC23A2	723.264	-1.1393	0.136203	-8.36472	6.026e-17	3.51986e-16
TBC1D8B	1282.01	-2.09224	0.250151	-8.36391	6.06733e-17	3.54161e-16
ITGB8	705.76	-1.91103	0.228565	-8.361	6.21863e-17	3.62624e-16
BANF1	334.254	1.96503	0.235166	8.35594	6.49111e-17	3.78129e-16
DNAH1	2489.43	-1.58427	0.189691	-8.35186	6.71959e-17	3.91307e-16
CPOX	882.995	1.99855	0.239383	8.34877	6.89771e-17	4.01408e-16
RPL9	4160.96	2.08036	0.249229	8.34717	6.99162e-17	4.06599e-16
PMPCB	514.12	1.12072	0.134508	8.33194	7.953e-17	4.6204e-16
DHX57	524.455	-1.20176	0.144257	-8.33067	8.03859e-17	4.66856e-16
DHX33	377.63	1.12736	0.135366	8.32827	8.20328e-17	4.75939e-16
PGM5P1	417.614	-2.8575	0.343127	-8.32783	8.23375e-17	4.77546e-16
TRAK1	1183.32	-0.782954	0.0940535	-8.32455	8.46487e-17	4.90621e-16
ZSCAN29	739.415	1.04085	0.125047	8.32368	8.52735e-17	4.9391e-16
RPP30	318.365	1.42281	0.170959	8.32255	8.60879e-17	4.9846e-16
HNRNPK	4138.3	0.910012	0.109403	8.31795	8.94963e-17	5.175e-16
CAPG	953.827	1.2825	0.154222	8.31592	9.1042e-17	5.26261e-16
TAF9	442.091	1.74897	0.210376	8.31354	9.28913e-17	5.36411e-16
HMOX1	310.631	-2.17772	0.262013	-8.31151	9.44894e-17	5.45275e-16
ENTPD4	957.161	-1.1271	0.135649	-8.30889	9.65989e-17	5.57261e-16
CDK6	6815.49	1.56694	0.188693	8.30418	1.00514e-16	5.7946e-16
ATP5J2	474.157	1.90621	0.229585	8.30284	1.01649e-16	5.85804e-16
GTF2F1	888.756	0.99693	0.120085	8.30186	1.02495e-16	5.90288e-16
CWC15	313.416	1.04655	0.126068	8.30148	1.02819e-16	5.91957e-16
MS4A7	423.327	-1.15644	0.139328	-8.30013	1.04e-16	5.98555e-16
VPS13D	2362.12	-1.04143	0.125571	-8.29353	1.09939e-16	6.31262e-16
BCAT1	642.785	0.964172	0.116292	8.29094	1.1236e-16	6.44731e-16
ATL3	1090.98	1.25298	0.151133	8.29058	1.12697e-16	6.46238e-16
ZFC3H1	1554.14	-1.76079	0.212403	-8.28986	1.13378e-16	6.49713e-16
MOB1B	1344.41	-0.821927	0.0991658	-8.28841	1.14773e-16	6.57483e-16
FAM195B	423.253	1.354	0.163542	8.27921	1.23994e-16	7.08893e-16
GPAA1	563.628	1.88799	0.228083	8.27765	1.25633e-16	7.17792e-16
RAD1	359.756	1.35459	0.163648	8.27745	1.25846e-16	7.18769e-16
PRDM2	723.661	-1.28884	0.155725	-8.27643	1.26927e-16	7.24226e-16
ZFYVE16	544.729	-1.71254	0.206944	-8.27537	1.28053e-16	7.30406e-16
VMA21	772.585	1.53622	0.185646	8.27501	1.28447e-16	7.32166e-16
PIP4K2B	790.424	1.41495	0.171075	8.27094	1.32905e-16	7.5733e-16
OBSL1	1246.8	1.46804	0.177587	8.26661	1.37827e-16	7.85119e-16
ATXN2L	1841.1	-1.35281	0.163722	-8.26282	1.42267e-16	8.09342e-16
BIRC5	436.222	1.5212	0.184106	8.26259	1.42539e-16	8.10622e-16
NNT	1198.21	1.30303	0.157755	8.25983	1.45881e-16	8.29077e-16
ARL6IP1	1229.36	1.50266	0.182194	8.24762	1.61574e-16	9.16453e-16
KIAA0125	1920.7	1.50031	0.18198	8.24436	1.66052e-16	9.40927e-16
ECT2	577.343	-1.46088	0.177243	-8.24223	1.69024e-16	9.57137e-16
C16orf54	1533.14	0.780234	0.0946848	8.24033	1.71733e-16	9.7184e-16
SSU72	955.155	1.15307	0.139946	8.2394	1.73075e-16	9.78788e-16
TSC22D3	5046.44	0.935044	0.113484	8.23944	1.73026e-16	9.78788e-16
MIDN	986.599	-2.12839	0.258327	-8.23914	1.73448e-16	9.80577e-16
DDIT3	310.26	-1.13202	0.1374	-8.23881	1.73933e-16	9.82996e-16
CTC1	769.316	-1.951	0.236869	-8.23664	1.7712e-16	1.00068e-15
TECR	468.706	1.40986	0.17118	8.23617	1.77807e-16	1.00358e-15
CLIP2	1410.33	-1.67471	0.203354	-8.23543	1.78918e-16	1.00952e-15
SARNP	646.163	1.14343	0.138918	8.23097	1.85707e-16	1.0468e-15
PLCG1	340.964	-1.38086	0.167787	-8.22982	1.87501e-16	1.05656e-15
CTB-133G6.1	1877.3	1.00189	0.121767	8.22788	1.9055e-16	1.07269e-15
BFAR	344.538	1.05945	0.128806	8.22516	1.94933e-16	1.09701e-15
SET	3892.54	1.97116	0.239671	8.22445	1.96096e-16	1.10319e-15
YWHAQ	1574.61	1.76376	0.214706	8.21475	2.12605e-16	1.19412e-15
MESDC2	531.918	1.07383	0.130759	8.21229	2.17001e-16	1.21802e-15
SRP72	670.14	1.21205	0.147596	8.21196	2.17605e-16	1.22101e-15
SLBP	681.298	1.44183	0.175611	8.21035	2.20542e-16	1.23709e-15
RRM1	738.674	1.79842	0.21925	8.20263	2.3519e-16	1.31711e-15
ACP1	439.594	1.4798	0.180441	8.20101	2.38376e-16	1.33365e-15
SIN3B	1240.75	-1.70819	0.208417	-8.19602	2.48483e-16	1.3884e-15
MTMR3	2063.04	-0.823705	0.100569	-8.19047	2.60203e-16	1.45294e-15
CHTF8	492.094	1.44315	0.176216	8.18968	2.6193e-16	1.46211e-15
ODC1	1381.91	1.27197	0.155432	8.18342	2.75901e-16	1.53711e-15
COPZ1	461.377	1.59244	0.194622	8.18224	2.78606e-16	1.55168e-15
HPS6	313.31	1.45989	0.178516	8.17793	2.88772e-16	1.60674e-15
ABCG1	389.191	-1.55032	0.189595	-8.17704	2.90898e-16	1.61805e-15
PTPLB	666.469	-1.54934	0.189508	-8.17561	2.94374e-16	1.63633e-15
SDF4	1166.27	1.2566	0.153773	8.17177	3.03889e-16	1.68704e-15
GDI2	1759.15	1.39836	0.171177	8.16907	3.1078e-16	1.72419e-15
RBX1	302.339	1.36565	0.167184	8.16857	3.1206e-16	1.73074e-15
ADH5	487.965	1.63096	0.199677	8.16798	3.13593e-16	1.73868e-15
EIF3A	5350.93	0.87516	0.107149	8.16772	3.1427e-16	1.74187e-15
ARHGEF11	413.747	-1.37538	0.168438	-8.16545	3.20234e-16	1.77436e-15
INPP4A	1043.5	-1.15036	0.140945	-8.16178	3.30117e-16	1.82794e-15
PSMC1	597.592	1.29647	0.158885	8.15984	3.35469e-16	1.85698e-15
FSIP2	1079.54	-2.58255	0.316533	-8.15887	3.38181e-16	1.87139e-15
CCNK	376.224	-1.26454	0.155089	-8.15364	3.53133e-16	1.95225e-15
SLC12A7	1585.47	-2.13525	0.261969	-8.15078	3.6158e-16	1.99639e-15
CENPO	369.658	1.42969	0.175481	8.14724	3.72317e-16	2.0537e-15
ABL2	677.316	-1.06485	0.130711	-8.14657	3.74395e-16	2.0645e-15
HIST1H2BF	966.916	2.18059	0.267699	8.14568	3.77169e-16	2.07847e-15
PTPN12	394.283	-1.54384	0.189535	-8.14542	3.77983e-16	2.08229e-15
PSMA1	742.589	1.29645	0.159189	8.14409	3.82156e-16	2.10393e-15
ANKRD13A	1045.3	-0.56945	0.0699257	-8.14365	3.83549e-16	2.11026e-15
DDIT4	432.182	1.26547	0.155409	8.1428	3.86245e-16	2.12441e-15
RPS28	763.716	2.1253	0.261292	8.13381	4.16003e-16	2.28444e-15
TMEM219	434.929	1.31176	0.161422	8.12626	4.42736e-16	2.42584e-15
METTL9	1289.2	1.15713	0.142431	8.12409	4.50725e-16	2.46882e-15
SAMD8	431.512	-1.24999	0.153876	-8.12331	4.53645e-16	2.48403e-15
CTD-2207O23.3	1398.45	1.38828	0.17099	8.11907	4.69772e-16	2.56744e-15
NDUFS1	1345.73	1.52011	0.187304	8.11574	4.82837e-16	2.63634e-15
SERP1	1563.46	1.50159	0.185059	8.11409	4.89443e-16	2.66987e-15
HOOK2	554.449	-2.51525	0.310008	-8.1135	4.91821e-16	2.682e-15
ISCU	347.654	0.933355	0.115105	8.10872	5.11577e-16	2.78708e-15
APPL2	410.001	-1.09527	0.135101	-8.10706	5.18607e-16	2.82449e-15
CCP110	500.189	0.969485	0.119625	8.10438	5.30134e-16	2.88363e-15
SREBF1	1048.44	-1.79825	0.221918	-8.1032	5.35312e-16	2.91088e-15
NFE2L2	630.381	-1.06703	0.131683	-8.10301	5.36137e-16	2.91444e-15
C1orf43	612.251	0.659077	0.0813764	8.09912	5.53588e-16	3.00457e-15
PHLPP1	1428.76	-1.57278	0.194434	-8.08903	6.01401e-16	3.25689e-15
USP33	1428.74	-0.956164	0.118228	-8.08745	6.09269e-16	3.29847e-15
ATAD5	894.591	1.18683	0.146817	8.08373	6.28168e-16	3.39972e-15
EVL	1066	-0.875993	0.108378	-8.08273	6.33353e-16	3.4267e-15
RNF19B	402.912	-1.79755	0.222464	-8.08018	6.46699e-16	3.49672e-15
SEPHS2	349.835	1.3266	0.164274	8.07553	6.71863e-16	3.62936e-15
SREBF2	1205.99	-1.4222	0.176117	-8.07532	6.73024e-16	3.63422e-15
GTF2H3	394.51	1.2687	0.157407	8.05999	7.62984e-16	4.10616e-15
WBP1	302.976	1.08563	0.134789	8.05423	7.99779e-16	4.3015e-15
KNOP1	318.501	2.41677	0.300203	8.05046	8.24833e-16	4.43218e-15
TRIM28	3537.02	1.09998	0.136636	8.05046	8.24848e-16	4.43218e-15
PRMT3	347.834	1.03689	0.128837	8.04802	8.41437e-16	4.51428e-15
KIF5B	1739.05	1.0667	0.132581	8.04566	8.57807e-16	4.59924e-15
KIAA0247	721.239	-0.94992	0.118122	-8.04188	8.84706e-16	4.73463e-15
CECR1	945.577	-1.55096	0.192938	-8.03862	9.08585e-16	4.85941e-15
SH3BP2	2130.14	-1.67188	0.208152	-8.03199	9.59022e-16	5.1228e-15
DHX9	2386.23	0.752761	0.0937275	8.03138	9.63849e-16	5.147e-15
CENPF	2173.17	1.40235	0.174663	8.02889	9.83567e-16	5.25066e-15
CDC42EP3	546.306	-0.98044	0.122153	-8.02633	1.00435e-15	5.35661e-15
ZNF674	355.831	-2.24039	0.279239	-8.0232	1.03028e-15	5.49325e-15
IDH3B	673.84	0.933199	0.116367	8.01944	1.06224e-15	5.66016e-15
FAM115A	520.257	1.65151	0.205985	8.01764	1.07799e-15	5.74228e-15
JH8	462.43	0.829743	0.103501	8.01675	1.08577e-15	5.78193e-15
MFNG	646.292	1.08067	0.134821	8.01558	1.09622e-15	5.834e-15
THAP4	341.397	1.57898	0.197155	8.00883	1.15806e-15	6.15927e-15
MAP3K1	2338.58	-1.09252	0.136462	-8.006	1.18498e-15	6.29599e-15
EIF3G	1266.48	0.659565	0.0824073	8.00371	1.20722e-15	6.40892e-15
SLFN5	332.8	-0.9725	0.121523	-8.0026	1.21818e-15	6.4631e-15
PARP12	477.958	-1.17919	0.147468	-7.99621	1.28305e-15	6.79262e-15
RPS15A	5456.99	2.03302	0.2543	7.9946	1.29993e-15	6.87781e-15
AP2S1	381.402	1.63902	0.205135	7.98997	1.34968e-15	7.13442e-15
NAA38	582.587	1.04458	0.130753	7.98892	1.36125e-15	7.19337e-15
FAM177A1	723.025	-1.07966	0.13519	-7.98622	1.39137e-15	7.34354e-15
GLUL	6454.03	1.03704	0.129886	7.98418	1.41455e-15	7.46133e-15
CCDC162P	964.653	4.82345	0.604184	7.98341	1.42341e-15	7.50576e-15
SHCBP1	339.503	1.34835	0.1689	7.98314	1.42659e-15	7.52026e-15
EML4	625.467	-0.749798	0.0939286	-7.98263	1.43246e-15	7.5489e-15
ESYT1	2886.1	0.940686	0.117917	7.9775	1.49324e-15	7.85957e-15
TNFRSF10B	817.055	-1.04949	0.131767	-7.96472	1.65596e-15	8.70012e-15
MAST2	422.367	-1.36989	0.172024	-7.96338	1.67401e-15	8.79226e-15
LAMTOR4	540.417	1.00972	0.126821	7.96181	1.69538e-15	8.89365e-15
CRKL	1595.37	1.13537	0.142609	7.96137	1.70141e-15	8.92256e-15
RINT1	355.382	-1.54114	0.193593	-7.96072	1.71043e-15	8.96714e-15
KEAP1	538.639	1.43791	0.180653	7.95952	1.72711e-15	9.04357e-15
MTF2	926.236	0.794265	0.0997976	7.95875	1.73782e-15	9.09415e-15
NAP1L1	2263.87	1.19299	0.149973	7.95473	1.79523e-15	9.38318e-15
MT-CO2	61364.8	-2.03335	0.25566	-7.95333	1.8157e-15	9.48733e-15
OAS3	646.476	-1.36936	0.172196	-7.95232	1.83058e-15	9.56214e-15
SOGA1	1271.85	-1.0925	0.137469	-7.94727	1.90671e-15	9.94475e-15
DOCK5	2682.21	-1.48645	0.18707	-7.94595	1.92706e-15	1.00479e-14
SV2A	588.527	0.831065	0.104679	7.93915	2.0357e-15	1.06015e-14
TACC3	1899.71	1.04411	0.131581	7.93515	2.10234e-15	1.09321e-14
MYO15B	9975.98	-1.25577	0.158295	-7.93312	2.13703e-15	1.11091e-14
SLC45A3	704.5	1.69785	0.214087	7.93066	2.17978e-15	1.13245e-14
BLOC1S6	2921.25	-1.10502	0.139667	-7.91184	2.53617e-15	1.31325e-14
SPNS2	816.629	1.66732	0.210849	7.90765	2.62284e-15	1.3569e-14
TMEM104	404.992	-2.31742	0.293094	-7.90675	2.64197e-15	1.36639e-14
IKBKAP	785.586	0.955646	0.120916	7.90338	2.71449e-15	1.40264e-14
SERINC3	999.546	0.965572	0.122233	7.89942	2.80194e-15	1.44696e-14
MBNL3	735.621	1.07102	0.135584	7.89927	2.80539e-15	1.4483e-14
OAT	476.437	1.43153	0.181273	7.89711	2.85438e-15	1.47183e-14
NSFL1C	765.087	0.91867	0.116386	7.8933	2.94299e-15	1.51616e-14
HJURP	444.056	1.37009	0.173691	7.8881	3.06813e-15	1.57921e-14
SNTB2	335.588	-0.998437	0.126677	-7.88174	3.22856e-15	1.65981e-14
AGO2	840.962	-1.44326	0.183267	-7.87519	3.40235e-15	1.74708e-14
PLEKHF2	375.622	0.843916	0.107176	7.87409	3.43223e-15	1.76084e-14
KREMEN1	350.988	-1.51513	0.192425	-7.87387	3.43823e-15	1.7634e-14
STK4	2185.25	-0.871451	0.110728	-7.87021	3.54057e-15	1.81535e-14
EP300	2308.84	-1.32376	0.168206	-7.86987	3.55023e-15	1.81975e-14
PDHB	623.767	1.06069	0.134799	7.86868	3.58413e-15	1.83658e-14
HNRNPL	3233.37	1.09959	0.139771	7.86709	3.62985e-15	1.85891e-14
VAMP2	546.429	-1.33591	0.169861	-7.86473	3.6989e-15	1.89315e-14
MPG	358.473	2.00832	0.255382	7.86396	3.72165e-15	1.90423e-14
SEP15	530.514	1.34035	0.170585	7.85736	3.92319e-15	2.00556e-14
NUP205	1282.1	1.30417	0.166019	7.85558	3.97919e-15	2.03238e-14
PAPD7	394.362	-1.27719	0.162595	-7.85503	3.99686e-15	2.0402e-14
RCN2	357.087	1.57524	0.200625	7.85164	4.10636e-15	2.09423e-14
MGAT2	727.285	1.60753	0.204849	7.8474	4.24734e-15	2.16357e-14
FGD3	1294.84	-0.858356	0.109391	-7.84668	4.27206e-15	2.17552e-14
INTU	507.942	-2.18167	0.278075	-7.84563	4.30783e-15	2.19309e-14
AKAP5	302.607	-2.56733	0.327395	-7.8417	4.44484e-15	2.26083e-14
NCAPG	554.553	2.0407	0.260267	7.84078	4.47745e-15	2.27675e-14
AGGF1	426.158	1.41459	0.180418	7.84065	4.48204e-15	2.27841e-14
MRPL20	443.276	1.5924	0.203134	7.83912	4.53698e-15	2.3043e-14
MARK4	350.54	-1.2285	0.156723	-7.83869	4.55258e-15	2.31155e-14
GABPA	333.573	1.04576	0.133423	7.83796	4.5794e-15	2.32311e-14
ERH	438.378	2.2946	0.292858	7.83522	4.68037e-15	2.37224e-14
MAPKAPK3	1822.71	1.19672	0.15277	7.83348	4.74539e-15	2.40449e-14
ATP5L	755.32	1.82401	0.232994	7.82856	4.93506e-15	2.49913e-14
UBXN11	984.627	-0.739977	0.0945349	-7.82756	4.97444e-15	2.51759e-14
MYO5C	373.402	1.75837	0.224674	7.82634	5.02291e-15	2.54063e-14
SRRM1	1244.96	-1.30421	0.166677	-7.82477	5.08579e-15	2.57093e-14
AGAP2	766.305	1.3919	0.177885	7.8247	5.08869e-15	2.57164e-14
SCMH1	861.983	1.11788	0.142904	7.8226	5.17431e-15	2.61338e-14
C17orf49	311.938	1.35987	0.173917	7.81911	5.31981e-15	2.68608e-14
EMC10	886.958	1.35227	0.172946	7.81901	5.32423e-15	2.68752e-14
UIMC1	963.231	-1.1722	0.150024	-7.81338	5.56741e-15	2.80699e-14
AC245884.2	391.171	1.80605	0.231175	7.81247	5.60786e-15	2.82655e-14
ORC4	1434.17	-0.945952	0.1211	-7.8113	5.66008e-15	2.85204e-14
TPT1	14574.5	1.45734	0.186574	7.81108	5.67012e-15	2.85626e-14
LST1	1055.34	0.946393	0.121218	7.80739	5.83837e-15	2.94016e-14
OSTF1	357.817	0.921914	0.118146	7.80319	6.03602e-15	3.03614e-14
SSR3	1039.81	1.78123	0.2283	7.80215	6.08622e-15	3.05961e-14
JADE1	1012.07	0.852833	0.109367	7.79791	6.29414e-15	3.16229e-14
USP36	1318.91	-1.19105	0.152863	-7.79161	6.61594e-15	3.31914e-14
RTN3	879.991	0.708915	0.0910007	7.79022	6.6893e-15	3.35496e-14
RBM12	920.696	1.62214	0.20834	7.78605	6.91355e-15	3.4634e-14
MPHOSPH9	1153.51	1.07126	0.137645	7.78281	7.093e-15	3.55021e-14
SIKE1	416.897	1.13849	0.146368	7.77828	7.35166e-15	3.67647e-14
FBXO45	361.689	1.04971	0.134963	7.77775	7.38235e-15	3.69075e-14
PET112	372.934	1.37814	0.177217	7.77658	7.4513e-15	3.72306e-14
SLC29A1	549.247	0.878989	0.113031	7.77652	7.45454e-15	3.7236e-14
VWCE	386	-1.35986	0.174869	-7.77642	7.4605e-15	3.72442e-14
BAX	663.156	1.28263	0.164978	7.77452	7.5735e-15	3.77755e-14
FAM111A	1178.9	1.09451	0.140826	7.77202	7.72414e-15	3.85157e-14
TNFAIP2	2724.54	-2.13177	0.274442	-7.76767	7.99412e-15	3.98504e-14
ZBTB18	433.772	-0.898186	0.115635	-7.76742	8.00979e-15	3.9917e-14
TAF1	2645.74	-1.51871	0.195681	-7.76114	8.41719e-15	4.18867e-14
SLC35E1	908.437	-0.876593	0.112984	-7.75857	8.58921e-15	4.27181e-14
SLC16A1	427.626	1.3213	0.170621	7.74411	9.62537e-15	4.77063e-14
CBLB	468.953	-1.4782	0.190971	-7.74047	9.90512e-15	4.90505e-14
TRIM56	1053.48	-1.18979	0.153883	-7.73181	1.0603e-14	5.23563e-14
YTHDF1	402.786	1.06504	0.137765	7.73087	1.06811e-14	5.27268e-14
KIAA1143	457.691	1.20366	0.155857	7.72286	1.13747e-14	5.61024e-14
DTYMK	367.132	1.38471	0.179486	7.71485	1.21129e-14	5.96751e-14
AEN	539.558	1.58751	0.205826	7.71286	1.23027e-14	6.05929e-14
CCNG2	649.128	-0.827958	0.107355	-7.71235	1.23521e-14	6.08186e-14
WDR12	835.853	2.3633	0.306576	7.70871	1.27093e-14	6.25418e-14
CAPS	806.297	-1.20815	0.156781	-7.70597	1.29849e-14	6.38434e-14
BRMS1	444.037	0.968511	0.125687	7.70572	1.30111e-14	6.3954e-14
AAR2	312.473	1.11295	0.144486	7.70277	1.33151e-14	6.5355e-14
PKNOX1	413.963	-1.66717	0.216471	-7.70155	1.34427e-14	6.5944e-14
CMPK1	568.661	1.21068	0.157202	7.70143	1.34555e-14	6.59879e-14
MRC2	855.287	2.20947	0.287019	7.69802	1.38195e-14	6.76958e-14
FTO	1145.77	0.856258	0.111249	7.69675	1.39568e-14	6.83492e-14
MGRN1	1361.77	-1.108	0.143996	-7.69461	1.41921e-14	6.94226e-14
SHFM1	311.027	1.06669	0.138633	7.69437	1.42192e-14	6.95353e-14
DNAJC9	628.726	2.4226	0.314877	7.69378	1.4285e-14	6.98374e-14
SUGT1	658.809	0.980891	0.127504	7.69301	1.43718e-14	7.0202e-14
RPL28	2387.42	1.6939	0.220195	7.69272	1.4404e-14	7.03391e-14
ALOX12P2	745.114	-1.18271	0.153746	-7.69267	1.44095e-14	7.03461e-14
VANGL1	395.021	1.40325	0.182601	7.68478	1.53256e-14	7.47127e-14
CUL3	939.519	-0.785357	0.102256	-7.68031	1.58709e-14	7.72839e-14
COG7	443.126	-1.59142	0.207259	-7.67842	1.61062e-14	7.83854e-14
AGPS	788.304	1.6371	0.213276	7.67598	1.64158e-14	7.98472e-14
ATF7IP	2181.08	-1.28627	0.16758	-7.67554	1.64726e-14	8.01006e-14
GATAD2B	823.258	-0.998439	0.130087	-7.67513	1.65248e-14	8.03319e-14
TNKS	1133.23	-1.39762	0.182111	-7.67457	1.65971e-14	8.06607e-14
EIF2S3	2180.13	1.14502	0.1492	7.67438	1.66221e-14	8.07593e-14
REC8	372.551	-1.91395	0.249545	-7.66977	1.72305e-14	8.36447e-14
ANXA5	535.27	-1.36848	0.178529	-7.66532	1.78379e-14	8.64717e-14
ZFHX3	1507.08	-2.54932	0.333054	-7.65436	1.9427e-14	9.39897e-14
PAQR4	322.229	1.72134	0.225	7.65043	2.00316e-14	9.68063e-14
AARS2	825.311	0.701568	0.0917162	7.64934	2.02014e-14	9.75995e-14
FAM104A	437.321	1.10069	0.143938	7.647	2.05728e-14	9.93102e-14
COG2	342.503	1.05917	0.138558	7.64424	2.10188e-14	1.01407e-13
UVRAG	1090.51	-0.941099	0.123159	-7.64135	2.14951e-14	1.03646e-13
UFC1	543.592	1.4323	0.187497	7.63903	2.18863e-14	1.05503e-13
PRKY	346.051	-2.28624	0.299337	-7.6377	2.21134e-14	1.06539e-13
BRD1	1552.62	-1.23835	0.162187	-7.63535	2.25213e-14	1.08443e-13
RUSC2	546.929	-1.26998	0.166367	-7.63364	2.28222e-14	1.09861e-13
UQCRC2	860.159	0.875078	0.114636	7.63352	2.28433e-14	1.09932e-13
CAPRIN1	2584.18	0.814429	0.106819	7.62438	2.45208e-14	1.17883e-13
ZNF587	1037.99	-1.36326	0.178802	-7.62437	2.45227e-14	1.17883e-13
UNKL	824.883	-1.51653	0.198966	-7.62207	2.49637e-14	1.19936e-13
CERS5	658.498	-1.8126	0.237884	-7.61969	2.54286e-14	1.22067e-13
MS4A4E	500.776	-1.22925	0.161429	-7.6148	2.6409e-14	1.26703e-13
TOMM20	920.561	1.43193	0.188154	7.61044	2.73161e-14	1.30909e-13
PDE8A	400.541	-1.6691	0.219364	-7.60884	2.76557e-14	1.32463e-13
TAF11	582.766	0.853278	0.112148	7.6085	2.77287e-14	1.32776e-13
ECI1	316.492	1.96466	0.258612	7.59695	3.03189e-14	1.44977e-13
NR4A1	839.793	-1.58856	0.209141	-7.59563	3.06291e-14	1.4642e-13
SPTB	2142.57	1.70034	0.22388	7.59488	3.08076e-14	1.47233e-13
MINPP1	435.212	1.71408	0.225761	7.59245	3.13907e-14	1.49895e-13
UBE2G2	1302.01	0.686646	0.0904906	7.58804	3.24782e-14	1.54959e-13
AGRN	403.836	-1.96722	0.259335	-7.58561	3.30918e-14	1.57843e-13
TAF4B	423.65	1.33597	0.176164	7.58367	3.35905e-14	1.60177e-13
CTCF	967.585	0.997683	0.131591	7.58169	3.41078e-14	1.62554e-13
SLC17A9	2034.23	1.3411	0.176939	7.57948	3.46931e-14	1.65252e-13
NAIP	1073.03	-0.856028	0.112963	-7.57793	3.51115e-14	1.67199e-13
ZMYM6	563.372	-1.13779	0.150201	-7.57513	3.58772e-14	1.70563e-13
KIAA1524	379.951	1.18133	0.156017	7.5718	3.68074e-14	1.74888e-13
ATXN2	922.937	-1.50685	0.199064	-7.56969	3.74117e-14	1.77555e-13
WDR26	1862.52	-1.44248	0.190561	-7.56966	3.74193e-14	1.77555e-13
SLFN11	897.1	1.16615	0.154083	7.56829	3.78179e-14	1.79294e-13
DAP3	773.127	0.981292	0.1297	7.56587	3.85289e-14	1.82565e-13
RSBN1L	811.2	0.840711	0.111172	7.56227	3.96093e-14	1.87633e-13
CDYL	600.265	0.762489	0.100841	7.5613	3.99052e-14	1.88931e-13
NCOA3	1026.23	-1.01859	0.134785	-7.55717	4.11931e-14	1.94868e-13
RELT	1148.43	-1.6015	0.211923	-7.55697	4.12553e-14	1.95109e-13
SSR1	1229.49	1.14833	0.151968	7.55637	4.14467e-14	1.9596e-13
AAK1	856.289	-1.7015	0.225247	-7.55395	4.22263e-14	1.99482e-13
SRSF9	1105.19	1.65052	0.218535	7.55265	4.26485e-14	2.01366e-13
DDX39A	1590.5	1.01595	0.134557	7.55029	4.34275e-14	2.04932e-13
MATK	516.778	1.87754	0.248683	7.54993	4.35494e-14	2.05451e-13
VPS8	593.155	-0.978955	0.129682	-7.54887	4.39056e-14	2.07018e-13
[truncated: 5,185 more rows]
