# Supplementary material for: PoreMeth2 for decoding the evolution of methylome alterations with nanopore sequencing
Source: HighWire-hosted journal article supplement (doi:10.1101/gr.280259.124), 2025-10-20
Supplement: Supplemental_Table_5.xlsx [file Supplemental_Table_5.xlsx]

## Sheet: DMRs_T48_vs_T0
chr	start	end	DeltaBeta	DeltaEntropy	BetaTest	BetaControl	EntropyTest	EntropyControl	NumCpG	p	chr.GenCode	start.GenCode	end.GenCode	feature.GenCode	strand.GenCode	symbol.GenCode	type.GenCode	chr.GenCode.overlap	start.GenCode.overlap	end.GenCode.overlap	ratio1.GenCode.overlap	ratio2.GenCode.overlap	name.CGI	chr.CGI	start.CGI	end.CGI	chr.CGI.overlap	start.CGI.overlap	end.CGI.overlap	name.Enhancer	chr.Enhancer	start.Enhancer	end.Enhancer	chr.Enhancer.overlap	start.Enhancer.overlap	end.Enhancer.overlap	name.DNASE	chr.DNASE	start.DNASE	end.DNASE	chr.DNASE.overlap	start.DNASE.overlap	end.DNASE.overlap	name.TFBS	chr.TFBS	start.TFBS	end.TFBS	chr.TFBS.overlap	start.TFBS.overlap
chr1	715276	733184	0.222222222222222	-0.35441790522586	0.888888888888889	0.641025641025641	0.443940577062169	0.843443385531028	193	3.18638742652073e-35	chr1	720179	721179	Promoter	+	RP11-206L10.9	lincRNA	chr1	720179	721179	0.055840964931874	1	*	*	*	*	*	0	0	*	*	*	*	*	0	0	*	*	*	*	*	0	0	ATF2	chr1	719875	720285	chr1	720179
chr1	715276	733184	0.222222222222222	-0.35441790522586	0.888888888888889	0.641025641025641	0.443940577062169	0.843443385531028	193	3.18638742652073e-35	chr1	721180	723052	FirstExon	+	RP11-206L10.9	lincRNA	chr1	721180	723052	0.104534286352468	1	*	*	*	*	*	0	0	*	*	*	*	*	0	0	*	*	*	*	*	0	0	*	*	*	*	*	0
chr1	755255	760963	0.204933586337761	-0.336779257534311	0.857142857142857	0.6	0.517032723669088	0.868978910725107	48	3.36464378473158e-11	*	*	*	InterGenic	*	*	*	*	*	*	*	*	*	*	*	*	*	0	0	*	*	*	*	*	0	0	chr1-755205:755510	chr1	755205	755510	chr1	755255	755510	ZSCAN29,CTBP1	chr1	755258	755712	chr1	755258
chr1	805615	814104	0.236842105263158	-0.240126649943436	0.833333333333333	0.545454545454545	0.572927630709085	0.830720723810035	118	1.67686437901302e-19	chr1	804056	809491	Intron2	-	FAM41C	lincRNA	chr1	805615	809491	0.456590882318294	0.713155473781049	CpG: 50	chr1	805198	805628	chr1	805615	805628	*	*	*	*	*	0	0	chr1-805425:805730	chr1	805425	805730	chr1	805615	805730	CTCF,MTA2,EGR1,SIN3A,FIP1L1,TRIM22,XRCC5,CBX1,NRF1,MYC,BACH1,DPF2,SKI,RAD21,ELF1,SP1,ZNF217,ZFX,U2AF1,HNRNPL,GATAD2B,ESRRA,L3MBTL2,YY1,RB1,CREM,RBM25,STAT1,BHLHE40,MAX,ZNF143,CREB3L1,SAFB,TCF12,SKIL,SIN3B,JUND,ZNF687,SMC3,MTA1,CTBP1,KLF5,EP300,SMARCA5,RNF2,ZNF207,IRF3,E2F6,ZNF24,SMARCA4,IKZF1,REST,HDAC2,ARID3A,EZH2,THAP1,NR2F1,ZBTB33	chr1	804765	806403	chr1	805615
chr1	805615	814104	0.236842105263158	-0.240126649943436	0.833333333333333	0.545454545454545	0.572927630709085	0.830720723810035	118	1.67686437901302e-19	chr1	809492	810535	Exon2	-	FAM41C	lincRNA	chr1	809492	810535	0.122864883967487	1	*	*	*	*	*	0	0	*	*	*	*	*	0	0	chr1-809665:810030	chr1	809665	810030	chr1	809665	810030	*	*	*	*	*	0
chr1	805615	814104	0.236842105263158	-0.240126649943436	0.833333333333333	0.545454545454545	0.572927630709085	0.830720723810035	118	1.67686437901302e-19	chr1	810536	812125	Intron1	-	FAM41C	lincRNA	chr1	810536	812125	0.187183413829662	1	*	*	*	*	*	0	0	*	*	*	*	*	0	0	chr1-810845:810995	chr1	810845	810995	chr1	810845	810995	EGR1	chr1	811138	811382	chr1	811138
chr1	805615	814104	0.236842105263158	-0.240126649943436	0.833333333333333	0.545454545454545	0.572927630709085	0.830720723810035	118	1.67686437901302e-19	chr1	812126	812283	FirstExon	-	FAM41C	lincRNA	chr1	812126	812283	0.0184945223230062	1	*	*	*	*	*	0	0	*	*	*	*	*	0	0	*	*	*	*	*	0	0	CTCF	chr1	811935	812211	chr1	812126
chr1	805615	814104	0.236842105263158	-0.240126649943436	0.833333333333333	0.545454545454545	0.572927630709085	0.830720723810035	118	1.67686437901302e-19	chr1	812284	813284	Promoter	-	FAM41C	lincRNA	chr1	812284	813284	0.117799505242078	1	*	*	*	*	*	0	0	*	*	*	*	*	0	0	chr1-812300:812555	chr1	812300	812555	chr1	812300	812555	*	*	*	*	*	0
chr1	913029	915876	0.224206349206349	-0.26639982612474	0.82843137254902	0.588557993730408	0.562293133958655	0.828073144095665	145	2.17593734491033e-21	chr1	912005	914260	Intron3	-	C1orf170	protein_coding	chr1	913029	914260	0.432384966631542	0.54589800443459	CpG: 28	chr1	912869	913153	chr1	913029	913153	*	*	*	*	*	0	0	chr1-913345:914395	chr1	913345	914395	chr1	913345	914260	AGO1,EGR1,MAX,BCL3,E2F6,ZBTB33,TCF12,MNT,HDAC1,ZNF639,PKNOX1,GATAD2A,NRF1,RFX1,PHF21A,SMARCA4,MEIS2,IKZF1,CREB3L1,CTBP1,L3MBTL2,ESR1,EGR1,EBF1,POLR2A,E2F6,RBM14,CTCF,E2F6,UBTF,EZH2	chr1	913260	914906	chr1	913260
chr1	913029	915876	0.224206349206349	-0.26639982612474	0.82843137254902	0.588557993730408	0.562293133958655	0.828073144095665	145	2.17593734491033e-21	chr1	914261	916037	Exon3	-	C1orf170	protein_coding	chr1	914261	915876	0.567263786441869	0.909346846846847	*	*	*	*	*	0	0	*	*	*	*	*	0	0	chr1-913345:914395	chr1	913345	914395	chr1	914261	914395	AGO1,EGR1,MAX,BCL3,E2F6,ZBTB33,TCF12,MNT,HDAC1,ZNF639,PKNOX1,GATAD2A,NRF1,RFX1,PHF21A,SMARCA4,MEIS2,IKZF1,CREB3L1,CTBP1,L3MBTL2,ESR1,EGR1,EBF1,POLR2A,E2F6,RBM14,CTCF,E2F6,UBTF,EZH2	chr1	913260	914906	chr1	914261
chr1	1223330	1225348	0.317307692307692	-0.139416758986447	0.714285714285714	0.411764705882353	0.67831363798541	0.815479781557005	206	2.17712183195345e-51	chr1	1223319	1223417	Exon12	+	SCNN1D	protein_coding	chr1	1223330	1223417	0.0431119920713578	0.887755102040816	*	*	*	*	*	0	0	*	*	*	*	*	0	0	chr1-1223285:1223575	chr1	1223285	1223575	chr1	1223330	1223417	GABPA,MBD2,CTCF,HNRNPL,AGO1,PKNOX1,POLR2G,ZBTB33,HNRNPLL,TAF15,PCBP1,AGO1,RBM39,HNRNPL,POLR2G,HNRNPLL,SKI,USF1,NR2F6,UBTF,SP1,RXRA,ZMYM3	chr1	1220170	1223462	chr1	1223330
chr1	1223330	1225348	0.317307692307692	-0.139416758986447	0.714285714285714	0.411764705882353	0.67831363798541	0.815479781557005	206	2.17712183195345e-51	chr1	1223418	1225650	Intron12	+	SCNN1D	protein_coding	chr1	1223418	1225348	0.956392467789891	0.864695340501792	*	*	*	*	*	0	0	*	*	*	*	*	0	0	chr1-1223285:1223575	chr1	1223285	1223575	chr1	1223418	1223575	GABPA,MBD2,CTCF,HNRNPL,AGO1,PKNOX1,POLR2G,ZBTB33,HNRNPLL,TAF15,PCBP1,AGO1,RBM39,HNRNPL,POLR2G,HNRNPLL,SKI,USF1,NR2F6,UBTF,SP1,RXRA,ZMYM3	chr1	1220170	1223462	chr1	1223418
chr1	1225359	1225595	0.214285714285714	0.22210080365225	0.4	0.176470588235294	0.784248593623957	0.516264980231799	28	6.12744829827956e-05	chr1	1223418	1225650	Intron12	+	SCNN1D	protein_coding	chr1	1225359	1225595	1	0.10573476702509	*	*	*	*	*	0	0	*	*	*	*	*	0	0	*	*	*	*	*	0	0	IKZF1,CTCF,MIER1,HDAC1,BCOR,SIN3A,RBM39,CTBP1,ZNF444,NRF1,RAD21,HDAC2,DACH1,MTA3,PHF21A,XRCC5,TRIM22,ZBTB2,SKI,TFAP4,RB1,PCBP1,REST,GABPA,MAX,ZNF143,BACH1,MYC,ZBTB7A,EGR1,SMC3,YY1,SAFB,NR2F1,RBM14,BHLHE40,RBM22,AGO1,POLR2G,PCBP1,UBTF,NFIC,HNRNPL,FIP1L1,AGO2,NFIB,POLR2A,ZFX,ETS1,CTCF,MYC,GABPA,RBFOX2,ATF7,SIN3A,GMEB1,SKIL,RBM39,MXI1,PRDM10,ZEB1,ZNF687,FOXK2,NRF1,MTA3,ESRRA,CTBP1,DNMT1,SMC3,HDAC2,C…	chr1	1225325	1231370	chr1	1225359
chr1	1360333	1362708	0.24436090225564	-0.23943194468483	0.818181818181818	0.55	0.552580908834963	0.845536084797166	96	2.10676604296938e-16	chr1	1360507	1361507	Promoter	+	TMEM88B	protein_coding	chr1	1360507	1361507	0.421052631578947	1	*	*	*	*	*	0	0	*	*	*	*	*	0	0	chr1-1360965:1361615	chr1	1360965	1361615	chr1	1360965	1361507	ZBTB33	chr1	1360894	1361048	chr1	1360894
chr1	1360333	1362708	0.24436090225564	-0.23943194468483	0.818181818181818	0.55	0.552580908834963	0.845536084797166	96	2.10676604296938e-16	chr1	1361508	1361765	FirstExon	+	TMEM88B	protein_coding	chr1	1361508	1361765	0.108210526315789	1	CpG: 20	chr1	1361560	1361787	chr1	1361560	1361765	*	*	*	*	*	0	0	chr1-1360965:1361615	chr1	1360965	1361615	chr1	1361508	1361615	NR2F1,XRCC5,RBFOX2,AGO2,NR2C1,HDAC2,TAF15,POLR2G,HNRNPLL,NR2F6,SP1,PCBP1,ZBTB7A,HNRNPK,TFAP4,ZBTB7A,AGO2,HNRNPK,EBF1,TCF7L2,PCBP1,TCF7,EGR1,HDAC1,KDM4A,UBTF,POLR2A,E2F6,AGO1,ZBTB7A,PHF8,RB1,THAP1,PCBP2,HNRNPK,EGR1,TAF15,RBFOX2,AGO2,PCBP1,CBX3,ZBTB33	chr1	1361057	1364049	chr1	1361508
chr1	1360333	1362708	0.24436090225564	-0.23943194468483	0.818181818181818	0.55	0.552580908834963	0.845536084797166	96	2.10676604296938e-16	chr1	1361766	1362933	Intron1	+	TMEM88B	protein_coding	chr1	1361766	1362708	0.396631578947368	0.80719794344473	CpG: 20	chr1	1361560	1361787	chr1	1361766	1361787	*	*	*	*	*	0	0	chr1-1361625:1362250	chr1	1361625	1362250	chr1	1361766	1362250	NR2F1,XRCC5,RBFOX2,AGO2,NR2C1,HDAC2,TAF15,POLR2G,HNRNPLL,NR2F6,SP1,PCBP1,ZBTB7A,HNRNPK,TFAP4,ZBTB7A,AGO2,HNRNPK,EBF1,TCF7L2,PCBP1,TCF7,EGR1,HDAC1,KDM4A,UBTF,POLR2A,E2F6,AGO1,ZBTB7A,PHF8,RB1,THAP1,PCBP2,HNRNPK,EGR1,TAF15,RBFOX2,AGO2,PCBP1,CBX3,ZBTB33	chr1	1361057	1364049	chr1	1361766
chr1	1523445	1530158	0.208333333333333	-0.321406958441605	0.872282608695652	0.64	0.485152631568853	0.831744949626636	219	3.88440422069479e-38	*	*	*	InterGenic	*	*	*	*	*	*	*	*	*	*	*	*	*	0	0	*	*	*	*	*	0	0	chr1-1523905:1524055	chr1	1523905	1524055	chr1	1523905	1524055	ZFP91,CBX3,AFF1,CTBP1,GABPB1,ZBTB33,RBM39,MITF,PHB2,ZNF384,CEBPB,L3MBTL2,ZNF384,KDM1A,ZNF316,MAFF,LCORL,HNF4G,TCF7,IKZF1,PKNOX1	chr1	1521337	1524555	chr1	1523445
chr1	1533245	1534809	0.21	-0.347180199403317	0.875	0.608695652173913	0.498880254062286	0.858159471971027	76	8.42182680367913e-14	chr1	1533392	1535476	FirstExon	-	C1orf233	protein_coding	chr1	1533392	1534809	0.906010230179028	0.679942418426104	CpG: 160	chr1	1534331	1536136	chr1	1534331	1534809	*	*	*	*	*	0	0	chr1-1533365:1533615	chr1	1533365	1533615	chr1	1533392	1533615	MGA,ZNF687,MNT,MYC,SMARCA4,GMEB1,MAX,E2F6,POLR2A,MCM7,GATAD2A,PYGO2,CC2D1A,NFXL1,NFIC,NCOR1,ARHGAP35,BCOR,NCOA1,ZNF24,NCOA4,HDAC2,ZNF184,SMARCE1,CTBP1,GATAD2A,NFXL1,NFRKB,MLLT1,RFX1,HDAC2,FOXP1,HDAC1,SOX6,PHF20,CDC5L,CTBP1,PHF21A,ZNF592,AFF1,BRD9,NFRKB,ARNT,SMARCA4,TCF12,KDM1A,ZNF143,ZNF639,MLLT1,MCM5,TRIP13,TRIM24,MCM3,ELF1,NFXL1,NCOA1,ZBTB5,SMARCA5,ZNF282,EHMT2,SOX6,ZEB2,MTA2,LCORL,IKZF1,MTA1,N…	chr1	1529875	1536959	chr1	1533392
chr1	1860268	1864690	0.217341909882233	-0.289638586360907	0.853571428571428	0.620192307692307	0.512789003116773	0.85546312480061	151	1.18344655165061e-22	*	*	*	InterGenic	*	*	*	*	*	*	*	*	*	*	*	*	*	0	0	*	*	*	*	*	0	0	chr1-1860485:1860955	chr1	1860485	1860955	chr1	1860485	1860955	YY1,CTCF,HNRNPK,PCBP2,PRDM10,AGO2	chr1	1860534	1861925	chr1	1860534
chr1	2254361	2260835	0.204968944099379	-0.300654059016012	0.857142857142857	0.645161290322581	0.478506834760889	0.829185172672285	226	8.20380396805525e-34	chr1	2253019	2255535	Intron13	-	MORN1	protein_coding	chr1	2254361	2255535	0.181340747605808	0.466613672496025	CpG: 75	chr1	2253723	2254758	chr1	2254361	2254758	*	*	*	*	*	0	0	chr1-2254045:2254510	chr1	2254045	2254510	chr1	2254361	2254510	HNRNPLL,HNRNPL,PCBP1,RBM39,CTCF,UBTF,CBX2,CTCF,RFX1,EP300,SP1,HNRNPLL,NR2F2,POLR2A,TBP,TAF1,EZH2,RXRA,SKI,SUZ12,FOS,GABPA,RAD21,MAFK,ESR1,MAX,E2F6,RAD51,POLR2A,USF1	chr1	2251361	2254656	chr1	2254361
chr1	2254361	2260835	0.204968944099379	-0.300654059016012	0.857142857142857	0.645161290322581	0.478506834760889	0.829185172672285	226	8.20380396805525e-34	chr1	2255536	2255582	Exon13	-	MORN1	protein_coding	chr1	2255536	2255582	0.00710534445474204	1	*	*	*	*	*	0	0	*	*	*	*	*	0	0	*	*	*	*	*	0	0	PCBP1	chr1	2255427	2256023	chr1	2255536
chr1	2254361	2260835	0.204968944099379	-0.300654059016012	0.857142857142857	0.645161290322581	0.478506834760889	0.829185172672285	226	8.20380396805525e-34	chr1	2255583	2267907	Intron12	-	MORN1	protein_coding	chr1	2255583	2260835	0.811244979919679	0.426160337552743	CpG: 23	chr1	2258097	2258423	chr1	2258097	2258423	*	*	*	*	*	0	0	chr1-2256045:2256315	chr1	2256045	2256315	chr1	2256045	2256315	PCBP1	chr1	2255427	2256023	chr1	2255583
chr1	2254361	2260835	0.204968944099379	-0.300654059016012	0.857142857142857	0.645161290322581	0.478506834760889	0.829185172672285	226	8.20380396805525e-34	chr1	2257640	2258132	FirstExon	-	RP4-713A8.1	sense_intronic	chr1	2257640	2258132	0.0759962928637627	1	CpG: 23	chr1	2258097	2258423	chr1	2258097	2258132	*	*	*	*	*	0	0	chr1-2257705:2257855	chr1	2257705	2257855	chr1	2257705	2257855	CTCF,HNRNPL,RCOR1,RAD21,ZNF444,ZBTB5,MCM5,ZNF207,RNF2,FOXP1,BRD9,ZKSCAN1,SMARCA4,ZNF407,SMARCA5,HDAC1,FOXK2,BCOR,NCOR1,IKZF1,NR3C1,ZBTB2,NFXL1,MTA2,HDAC2,MCM2,MLLT1,ARHGAP35,ZNF184,MCM7,AFF1,EHMT2,MCM3	chr1	2257832	2259147	chr1	2257832
chr1	2254361	2260835	0.204968944099379	-0.300654059016012	0.857142857142857	0.645161290322581	0.478506834760889	0.829185172672285	226	8.20380396805525e-34	chr1	2258133	2259133	Promoter	-	RP4-713A8.1	sense_intronic	chr1	2258133	2259133	0.154464009885697	1	CpG: 23	chr1	2258097	2258423	chr1	2258133	2258423	*	*	*	*	*	0	0	chr1-2257980:2258290	chr1	2257980	2258290	chr1	2258133	2258290	CTCF,HNRNPL,RCOR1,RAD21,ZNF444,ZBTB5,MCM5,ZNF207,RNF2,FOXP1,BRD9,ZKSCAN1,SMARCA4,ZNF407,SMARCA5,HDAC1,FOXK2,BCOR,NCOR1,IKZF1,NR3C1,ZBTB2,NFXL1,MTA2,HDAC2,MCM2,MLLT1,ARHGAP35,ZNF184,MCM7,AFF1,EHMT2,MCM3	chr1	2257832	2259147	chr1	2258133
chr1	2406470	2406720	-0.218623481781376	0.039828518159493	0.533333333333333	0.761904761904762	0.87527152789797	0.784248593623957	8	0.208624708624709	chr1	2399102	2409914	Intron1	+	PLCH2	protein_coding	chr1	2406470	2406720	1	0.0231224565297817	*	*	*	*	*	0	0	chr1:2406489-2406881	chr1	2406489	2406881	chr1	2406489	2406720	chr1-2406405:2407015	chr1	2406405	2407015	chr1	2406470	2406720	PKNOX1,EZH2,UBTF,PCBP1,ZBTB7A,PRDM10,UBTF,RCOR1,YY1,POLR2A,CTCF,RAD21,RFX5,SP1,NR2F2,RXRA,MYC,MXI1,ESRRA,HNF4A,NR2F1,EGR1,FOXA1,UBTF,TBP	chr1	2404317	2407669	chr1	2406470
chr1	3391202	3393865	0.244375190027364	-0.209631227764843	0.769230769230769	0.510869565217392	0.651081118869133	0.861420741771777	61	1.92728089807928e-09	chr1	3390087	3391271	Intron8	+	ARHGEF16	protein_coding	chr1	3391202	3391271	0.0259106271122794	0.058277027027027	*	*	*	*	*	0	0	*	*	*	*	*	0	0	chr1-3391045:3391475	chr1	3391045	3391475	chr1	3391202	3391271	KDM1A,MNT,BCL3,PAX8,MAX,AGO2,POLR2A,TAF15,RBFOX2	chr1	3390546	3391485	chr1	3391202
chr1	3391202	3393865	0.244375190027364	-0.209631227764843	0.769230769230769	0.510869565217392	0.651081118869133	0.861420741771777	61	1.92728089807928e-09	chr1	3391272	3391346	Exon9	+	ARHGEF16	protein_coding	chr1	3391272	3391346	0.0277882087870822	1	*	*	*	*	*	0	0	*	*	*	*	*	0	0	chr1-3391045:3391475	chr1	3391045	3391475	chr1	3391272	3391346	KDM1A,MNT,BCL3,PAX8,MAX,AGO2,POLR2A,TAF15,RBFOX2	chr1	3390546	3391485	chr1	3391272
chr1	3391202	3393865	0.244375190027364	-0.209631227764843	0.769230769230769	0.510869565217392	0.651081118869133	0.861420741771777	61	1.92728089807928e-09	chr1	3391347	3392533	Intron9	+	ARHGEF16	protein_coding	chr1	3391347	3392533	0.445362373263237	1	*	*	*	*	*	0	0	*	*	*	*	*	0	0	chr1-3391045:3391475	chr1	3391045	3391475	chr1	3391347	3391475	KDM1A,MNT,BCL3,PAX8,MAX,AGO2,POLR2A,TAF15,RBFOX2	chr1	3390546	3391485	chr1	3391347
chr1	3391202	3393865	0.244375190027364	-0.209631227764843	0.769230769230769	0.510869565217392	0.651081118869133	0.861420741771777	61	1.92728089807928e-09	chr1	3392534	3392626	Exon10	+	ARHGEF16	protein_coding	chr1	3392534	3392626	0.0345475028163725	1	*	*	*	*	*	0	0	*	*	*	*	*	0	0	chr1-3392405:3392795	chr1	3392405	3392795	chr1	3392534	3392626	HNRNPL,POLR2A,SAFB,RBFOX2,HNRNPK,SAFB,HNRNPL,SKI,POLR2A,ZBTB7A,RBFOX2,AGO2,MAX,UBTF,CTCF,RBM39,POLR2A,POLR2A	chr1	3392224	3395513	chr1	3392534
chr1	3391202	3393865	0.244375190027364	-0.209631227764843	0.769230769230769	0.510869565217392	0.651081118869133	0.861420741771777	61	1.92728089807928e-09	chr1	3392627	3394438	Intron10	+	ARHGEF16	protein_coding	chr1	3392627	3393865	0.464889222681187	0.683600220872446	*	*	*	*	*	0	0	*	*	*	*	*	0	0	chr1-3392405:3392795	chr1	3392405	3392795	chr1	3392627	3392795	HNRNPL,POLR2A,SAFB,RBFOX2,HNRNPK,SAFB,HNRNPL,SKI,POLR2A,ZBTB7A,RBFOX2,AGO2,MAX,UBTF,CTCF,RBM39,POLR2A,POLR2A	chr1	3392224	3395513	chr1	3392627
chr1	3609937	3612140	0.227941176470588	-0.296889390219915	0.851648351648352	0.588235294117647	0.540115718759342	0.805702982981609	59	7.23008432102475e-11	chr1	3599745	3624112	Intron3	+	TP73	protein_coding	chr1	3609937	3612140	1	0.0904091599294127	*	*	*	*	*	0	0	*	*	*	*	*	0	0	chr1-3611545:3611695	chr1	3611545	3611695	chr1	3611545	3611695	SMARCA4,CTCF,POLR2A,ATF7,ATF2	chr1	3609306	3609975	chr1	3609937
chr1	3640444	3644099	0.204968944099379	0	0.65	0.368421052631579	0.673414735717919	0.718656034048636	52	0.000304584782973527	chr1	3640034	3643678	Intron6	+	TP73	protein_coding	chr1	3640444	3643678	0.884815321477428	0.88748627881449	*	*	*	*	*	0	0	*	*	*	*	*	0	0	chr1-3640365:3640615	chr1	3640365	3640615	chr1	3640444	3640615	CTCF,RBM39,SIN3A,SKIL,ZBTB7A,SMC3,RAD21,CREM,XRCC5,GABPA,RB1,ZNF444,HCFC1,TRIM22,ZNF143,MAX,YY1,KLF16,REST,NRF1,EBF1	chr1	3640607	3641978	chr1	3640607
chr1	3640444	3644099	0.204968944099379	0	0.65	0.368421052631579	0.673414735717919	0.718656034048636	52	0.000304584782973527	chr1	3643679	3643788	Exon7	+	TP73	protein_coding	chr1	3643679	3643788	0.0298221614227086	1	*	*	*	*	*	0	0	*	*	*	*	*	0	0	chr1-3643665:3643895	chr1	3643665	3643895	chr1	3643679	3643788	CTCF,CTBP1,AGO1,FIP1L1,UBTF,ZBTB7A,REST,POLR2G,CREM,RB1,BHLHE40,GABPA,MAX,ZNF143,RAD21,SMC3,POLR2A,TAF15	chr1	3643661	3645043	chr1	3643679
chr1	3640444	3644099	0.204968944099379	0	0.65	0.368421052631579	0.673414735717919	0.718656034048636	52	0.000304584782973527	chr1	3643789	3644191	Intron7	+	TP73	protein_coding	chr1	3643789	3644099	0.0848153214774282	0.771144278606965	*	*	*	*	*	0	0	*	*	*	*	*	0	0	chr1-3643665:3643895	chr1	3643665	3643895	chr1	3643789	3643895	CTCF,CTBP1,AGO1,FIP1L1,UBTF,ZBTB7A,REST,POLR2G,CREM,RB1,BHLHE40,GABPA,MAX,ZNF143,RAD21,SMC3,POLR2A,TAF15	chr1	3643661	3645043	chr1	3643789
chr1	10723656	10724129	0.329545454545455	0.082365322329313	0.666666666666667	0.235294117647059	0.720321349147894	0.63943194468483	18	0.00105985156730136	chr1	10720594	10725139	Intron5	-	CASZ1	protein_coding	chr1	10723656	10724129	1	0.104070407040704	*	*	*	*	*	0	0	chr1:10723795-10723954	chr1	10723795	10723954	chr1	10723795	10723954	chr1-10723285:10723675	chr1	10723285	10723675	chr1	10723656	10723675	POLR2A,ZBTB7A,TRIM28,SP1,CTCF,GABPA,SMARCA4,MAFK,RAD21,EGR1,ZFX,POLR2A,RXRA,MAX,SP1,HNF4A,SMARCA4,ZKSCAN1	chr1	10723441	10725167	chr1	10723656
chr1	11724056	11724782	0.25	0.07155081529684	0.571428571428571	0.32	0.579383111064289	0.493525809899345	84	4.04314949377985e-26	chr1	11723180	11724180	Promoter	+	FBXO6	protein_coding	chr1	11724056	11724180	0.170798898071625	0.124	CpG: 84	chr1	11724113	11724885	chr1	11724113	11724180	*	*	*	*	*	0	0	chr1-11724100:11725135	chr1	11724100	11725135	chr1	11724100	11724180	IKZF1,EZH2,EP400,NBN,CBFB,HDAC2,LEF1,CTCF,E4F1,MNT,DPF2,ZBTB40,ATF7,NRF1,SIN3A,NR2F6,MTA1,FOXK2,ZNF639,MTA3,BCOR,ZEB2,HNF4A,NR2F2,XRCC5,SMARCA4,ZBTB2,RBFOX2,SMC3,TRIM22,UBTF,NR2F1,CBX3,SKIL,POLR2G,PML,POLR2A,ZNF143,RUNX1,PCBP1,RNF2,NFIC,SOX6,MYC,MGA,AGO2,FIP1L1,RLF,RAD21,CTBP1,KDM5B,RBM39,CBX1,RB1,SMAD5,MTA2,FUS,TBP,CBFA2T3,L3MBTL2,HNRNPLL,MLLT1,RBM14,PHF20,YY1,HDAC1,KLF16,CBFA2T2,EGR1,MYNN,NEURO…	chr1	11723749	11725773	chr1	11724056
chr1	11724056	11724782	0.25	0.07155081529684	0.571428571428571	0.32	0.579383111064289	0.493525809899345	84	4.04314949377985e-26	chr1	11724181	11724312	FirstExon	+	FBXO6	protein_coding	chr1	11724181	11724312	0.180440771349862	1	CpG: 84	chr1	11724113	11724885	chr1	11724181	11724312	*	*	*	*	*	0	0	chr1-11724100:11725135	chr1	11724100	11725135	chr1	11724181	11724312	IKZF1,EZH2,EP400,NBN,CBFB,HDAC2,LEF1,CTCF,E4F1,MNT,DPF2,ZBTB40,ATF7,NRF1,SIN3A,NR2F6,MTA1,FOXK2,ZNF639,MTA3,BCOR,ZEB2,HNF4A,NR2F2,XRCC5,SMARCA4,ZBTB2,RBFOX2,SMC3,TRIM22,UBTF,NR2F1,CBX3,SKIL,POLR2G,PML,POLR2A,ZNF143,RUNX1,PCBP1,RNF2,NFIC,SOX6,MYC,MGA,AGO2,FIP1L1,RLF,RAD21,CTBP1,KDM5B,RBM39,CBX1,RB1,SMAD5,MTA2,FUS,TBP,CBFA2T3,L3MBTL2,HNRNPLL,MLLT1,RBM14,PHF20,YY1,HDAC1,KLF16,CBFA2T2,EGR1,MYNN,NEURO…	chr1	11723749	11725773	chr1	11724181
chr1	11724056	11724782	0.25	0.07155081529684	0.571428571428571	0.32	0.579383111064289	0.493525809899345	84	4.04314949377985e-26	chr1	11724313	11728712	Intron1	+	FBXO6	protein_coding	chr1	11724313	11724782	0.646005509641873	0.106615139804501	CpG: 84	chr1	11724113	11724885	chr1	11724313	11724782	*	*	*	*	*	0	0	chr1-11724100:11725135	chr1	11724100	11725135	chr1	11724313	11724782	IKZF1,EZH2,EP400,NBN,CBFB,HDAC2,LEF1,CTCF,E4F1,MNT,DPF2,ZBTB40,ATF7,NRF1,SIN3A,NR2F6,MTA1,FOXK2,ZNF639,MTA3,BCOR,ZEB2,HNF4A,NR2F2,XRCC5,SMARCA4,ZBTB2,RBFOX2,SMC3,TRIM22,UBTF,NR2F1,CBX3,SKIL,POLR2G,PML,POLR2A,ZNF143,RUNX1,PCBP1,RNF2,NFIC,SOX6,MYC,MGA,AGO2,FIP1L1,RLF,RAD21,CTBP1,KDM5B,RBM39,CBX1,RB1,SMAD5,MTA2,FUS,TBP,CBFA2T3,L3MBTL2,HNRNPLL,MLLT1,RBM14,PHF20,YY1,HDAC1,KLF16,CBFA2T2,EGR1,MYNN,NEURO…	chr1	11723749	11725773	chr1	11724313
chr1	14136087	14137592	0.223884810841332	-0.433241521682298	0.928571428571429	0.692307692307692	0.343556883146654	0.797610190449392	43	3.59789688900443e-10	chr1	14075983	14142921	Intron6	+	PRDM2	protein_coding	chr1	14136087	14137592	1	0.0224834921867997	*	*	*	*	*	0	0	*	*	*	*	*	0	0	chr1-14135865:14136290	chr1	14135865	14136290	chr1	14136087	14136290	ZKSCAN1,EED,RNF2,MNT,POLR2A,ATF2,CBX3,CTBP1,MYC,CBFA2T3,PML,KDM1A,DACH1,NCOA1,CTCF,SMARCC2,CC2D1A,DPF2,SMARCA4,ARNT,NR2F1,SOX6,ARID1B,MAX,HDAC2,MEF2B,HES1,TRIM28,NRF1,TBL1XR1,EBF1,FOXM1,NEUROD1,CREM,TCF7,EP300,IRF1,MYNN,EHMT2,GATA1,TCF12,GATA2,TAL1,GABPA,BCL3,CBFA2T2,MXI1,FOXK2,BHLHE40,NCOR1,YY1,ZNF143,TEAD4,TRIM24,REST,ZBTB7A,STAT2,EGR1,MEIS2,MTA2,SMARCE1,NR2F2,STAT5A,BCOR,ZNF282,NFIC,KLF16,CEBP…	chr1	14134966	14136952	chr1	14136087
chr1	16339741	16340867	0.246753246753247	-0.0130174137263861	0.666666666666667	0.347826086956522	0.707309364962454	0.744648888175075	30	0.000213373701293813	chr1	16340523	16342254	LastExon	-	HSPB7	protein_coding	chr1	16340523	16340867	0.30550621669627	0.198729058347776	*	*	*	*	*	0	0	*	*	*	*	*	0	0	chr1-16340405:16341075	chr1	16340405	16341075	chr1	16340523	16340867	MCM7,KDM1A,CHD4,LEF1,ZNF143,HDAC1,TCF12,ARNT,ZMYM3,EZH2,RBM25,CTCF,HDAC2,KDM4B,ZNF24,HNRNPL,PCBP1,CC2D1A,RBBP5,NFRKB,POLR2A,MTA3,ZNF217,KDM5B,ZBTB40,ZNF407,RBFOX2,MYNN,NR2F6,XRCC5,NRF1,RLF,IKZF1,CTBP1,REST,BCOR,BRD9,PTBP1,GABPB1,NCOA1,FOXM1,RB1,ZEB2,ZBTB2,RAD21,FOXK2,ZNF207,BHLHE40,ASH2L,PHB2,NFXL1,NBN,ESRRA,PKNOX1,SOX6,ZNF143,EED,ZMYM3,RXRA,SKIL,SMARCA5,BACH1,ETV4,SMAD5,POLR2G,CBFA2T3,TRIM24,ELF…	chr1	16338628	16343790	chr1	16340523
chr1	17564053	17568402	0.23537851037851	-0.160625337482211	0.75	0.5	0.614801722974687	0.812634958653462	77	1.27834178863449e-10	chr1	17563954	17565110	Intron12	+	PADI1	protein_coding	chr1	17564053	17565110	0.243044378017935	0.914359861591695	*	*	*	*	*	0	0	*	*	*	*	*	0	0	chr1-17563340:17564135	chr1	17563340	17564135	chr1	17564053	17564135	NFIB,RBM25,BMI1,CTCF,TRIM28,NFIC,KDM1A,SMC3,SIN3A,HCFC1,DPF2,ZNF143,ZKSCAN1,ZBTB33,RAD21,HSF1,ZNF24,YY1,MYC,ASH2L,TRIM22,RB1,XRCC5,CREB3L1,CTBP1,ELF1,KLF5,CBX5,REST,CC2D1A,C11orf30,KLF16,ZNF444,ZNF316,CREB1,ESRRA,PAX5,ARID2,GABPA,MAFF,CREM,TCF12,HNRNPL,MAFK,JUND,BATF,JUN,MAX,FOSL1,ATF3,FOSL2,FOS,ZNF579,SP1,RXRA,NFE2,NR2F1,ZEB2,ZNF217,SNRNP70,NR2F2,HNF4A,GATA3,RCOR1,NFIB,MTA1,NR3C1,DPF2,MBD2,RAD51…	chr1	17563231	17565155	chr1	17564053
chr1	17564053	17568402	0.23537851037851	-0.160625337482211	0.75	0.5	0.614801722974687	0.812634958653462	77	1.27834178863449e-10	chr1	17565111	17565204	Exon13	+	PADI1	protein_coding	chr1	17565111	17565204	0.0213842262589101	1	*	*	*	*	*	0	0	*	*	*	*	*	0	0	chr1-17565165:17565315	chr1	17565165	17565315	chr1	17565165	17565204	NFIB,RBM25,BMI1,CTCF,TRIM28,NFIC,KDM1A,SMC3,SIN3A,HCFC1,DPF2,ZNF143,ZKSCAN1,ZBTB33,RAD21,HSF1,ZNF24,YY1,MYC,ASH2L,TRIM22,RB1,XRCC5,CREB3L1,CTBP1,ELF1,KLF5,CBX5,REST,CC2D1A,C11orf30,KLF16,ZNF444,ZNF316,CREB1,ESRRA,PAX5,ARID2,GABPA,MAFF,CREM,TCF12,HNRNPL,MAFK,JUND,BATF,JUN,MAX,FOSL1,ATF3,FOSL2,FOS,ZNF579,SP1,RXRA,NFE2,NR2F1,ZEB2,ZNF217,SNRNP70,NR2F2,HNF4A,GATA3,RCOR1,NFIB,MTA1,NR3C1,DPF2,MBD2,RAD51…	chr1	17563231	17565155	chr1	17565111
chr1	17564053	17568402	0.23537851037851	-0.160625337482211	0.75	0.5	0.614801722974687	0.812634958653462	77	1.27834178863449e-10	chr1	17565205	17566198	Intron13	+	PADI1	protein_coding	chr1	17565205	17566198	0.228328351345137	1	*	*	*	*	*	0	0	*	*	*	*	*	0	0	chr1-17565165:17565315	chr1	17565165	17565315	chr1	17565205	17565315	BCL3,YY1,CTBP1,HDAC3,ELF4,HNF4A,NFIB,NR2F1,XRCC5,NFRKB,NR2F2,DEAF1,SP1,RXRA,RFX5,PKNOX1,JUN,GABPA,POLR2A,EP300,CTCF,SKIL,NUFIP1,HNF4G,JUND,EGR1,ZSCAN29,RAD21,NEUROD1,ZNF217	chr1	17565766	17566721	chr1	17565766
chr1	17564053	17568402	0.23537851037851	-0.160625337482211	0.75	0.5	0.614801722974687	0.812634958653462	77	1.27834178863449e-10	chr1	17566199	17566278	Exon14	+	PADI1	protein_coding	chr1	17566199	17566278	0.0181650954242355	1	*	*	*	*	*	0	0	*	*	*	*	*	0	0	chr1-17565945:17566215	chr1	17565945	17566215	chr1	17566199	17566215	BCL3,YY1,CTBP1,HDAC3,ELF4,HNF4A,NFIB,NR2F1,XRCC5,NFRKB,NR2F2,DEAF1,SP1,RXRA,RFX5,PKNOX1,JUN,GABPA,POLR2A,EP300,CTCF,SKIL,NUFIP1,HNF4G,JUND,EGR1,ZSCAN29,RAD21,NEUROD1,ZNF217	chr1	17565766	17566721	chr1	17566199
chr1	17564053	17568402	0.23537851037851	-0.160625337482211	0.75	0.5	0.614801722974687	0.812634958653462	77	1.27834178863449e-10	chr1	17566279	17567129	Intron14	+	PADI1	protein_coding	chr1	17566279	17567129	0.195447229248103	1	*	*	*	*	*	0	0	*	*	*	*	*	0	0	chr1-17566240:17566395	chr1	17566240	17566395	chr1	17566279	17566395	BCL3,YY1,CTBP1,HDAC3,ELF4,HNF4A,NFIB,NR2F1,XRCC5,NFRKB,NR2F2,DEAF1,SP1,RXRA,RFX5,PKNOX1,JUN,GABPA,POLR2A,EP300,CTCF,SKIL,NUFIP1,HNF4G,JUND,EGR1,ZSCAN29,RAD21,NEUROD1,ZNF217	chr1	17565766	17566721	chr1	17566279
chr1	17564053	17568402	0.23537851037851	-0.160625337482211	0.75	0.5	0.614801722974687	0.812634958653462	77	1.27834178863449e-10	chr1	17567130	17567255	Exon15	+	PADI1	protein_coding	chr1	17567130	17567255	0.0287422395953093	1	*	*	*	*	*	0	0	*	*	*	*	*	0	0	chr1-17567225:17567375	chr1	17567225	17567375	chr1	17567225	17567255	ZKSCAN1	chr1	17566882	17567232	chr1	17567130
chr1	17564053	17568402	0.23537851037851	-0.160625337482211	0.75	0.5	0.614801722974687	0.812634958653462	77	1.27834178863449e-10	chr1	17567256	17570504	Intron15	+	PADI1	protein_coding	chr1	17567256	17568402	0.263508852609795	0.352832512315271	*	*	*	*	*	0	0	*	*	*	*	*	0	0	chr1-17567225:17567375	chr1	17567225	17567375	chr1	17567256	17567375	IKZF1,EZH2,EED	chr1	17567756	17568471	chr1	17567756
chr1	18466692	18470393	0.211111111111111	-0.415426281415061	0.909090909090909	0.666666666666667	0.452259883149013	0.829518287397615	50	4.4838848262892e-11	chr1	18434693	18554391	Intron1	+	IGSF21	protein_coding	chr1	18466692	18470393	1	0.0309194806930776	*	*	*	*	*	0	0	*	*	*	*	*	0	0	chr1-18466965:18467155	chr1	18466965	18467155	chr1	18466965	18467155	HDAC2,KDM1A	chr1	18467526	18468182	chr1	18467526
chr1	27318941	27319419	0.26283422459893	0.130371789655409	0.381818181818182	0.151654411764706	0.640037321490309	0.507799716367787	19	0.00743814132743468	chr1	27319197	27320197	Promoter	+	TRNP1	protein_coding	chr1	27319197	27319419	0.464435146443515	0.222	*	*	*	*	*	0	0	*	*	*	*	*	0	0	chr1-27319405:27321335	chr1	27319405	27321335	chr1	27319405	27319419	HDAC2,ZMYM3,SKI,ZNF24,HNRNPUL1,MAFK,NCOR1,NR2F6,SP1,GATA2,POLR2A,FOXP1,RAD21,FOXK2,BHLHE40,JUND,HNF1A,FOS,TCF12,RXRA,CREB1,FOSL2,SOX13,REST,SIX5,FOXA2,TCF7,GATA4,RBFOX2,FOXA1,HNF4A,RFX5,POLR2G,ARID3A,EP300,CREM,TBP,ATF3,NR3C1,HDAC2,ETV4,SMC3,HNF4G,CEBPB,ELF1,ASH2L,ESRRA,TAF1,RBM22,PCBP1,HNRNPK,ARID1B,SKI,NCOR1,BCL3,RBM39,ATF3,ZBTB33,REST,FOXA2,ETV4,SMARCE1,ZNF24,CREB1,FOS,ZBTB7A,TBL1XR1,POLR2A,NR…	chr1	27316566	27319212	chr1	27319197
chr1	31888300	31919425	0.216951296647691	-0.274353538434855	0.833333333333333	0.568181818181818	0.583212185906961	0.896599396693663	420	2.7137162560979e-60	chr1	31883283	31896539	Intron2	+	SERINC2	protein_coding	chr1	31888300	31896539	0.264706827309237	0.621529873264937	*	*	*	*	*	0	0	*	*	*	*	*	0	0	chr1-31888285:31888435	chr1	31888285	31888435	chr1	31888300	31888435	ASH2L,POLR2A,ZEB2,EZH2,SIN3A,ZBTB7A,ZEB1,DEAF1,THAP1,ZFX,ATF7,HDAC1,KDM5B,TAF1,L3MBTL2,UBTF,CTCF,YY1,RBFOX2,SIN3B,MAX,POLR2G,PHF8,E2F6,REST,SUZ12,KDM4A,BHLHE40,RBM39,CLOCK,IKZF1,E2F6,HNRNPL,GATAD2B,TAF15,CTBP1,HNF4A,ZBTB40,RNF2,RXRA,SP1,MXI1,NFIC,TAF1,RAD21,NFIB,MAX,HNRNPLL,ZNF444,ZBTB11,HDAC2,ZNF639,GABPA,REST,NCOA6,PCBP1,SPI1,KDM4A,SIN3A,RBBP5,HNRNPK,ESR1,ZNF143,MXI1,KDM1A,ETS1,EP300,YY1,POLR2A…	chr1	31885411	31888808	chr1	31888300
chr1	31888300	31919425	0.216951296647691	-0.274353538434855	0.833333333333333	0.568181818181818	0.583212185906961	0.896599396693663	420	2.7137162560979e-60	chr1	31896540	31896701	Exon3	+	SERINC2	protein_coding	chr1	31896540	31896701	0.00517269076305221	1	*	*	*	*	*	0	0	*	*	*	*	*	0	0	chr1-31896280:31896655	chr1	31896280	31896655	chr1	31896540	31896655	GATAD2A,ASH2L,CTCF,SMARCA4,FOS,JUND,SIN3A,ZNF316,BHLHE40,ZNF318,RELB,TRIM24,SKI,REST,IKZF1,ATF3,SKIL,MEF2B,ATF7,CBFA2T3,FOSL2,DPF2,TBL1XR1,SMC3,ZFP91,ZNF24,ZEB2,HNRNPLL,RAD21,IKZF2,SREBF2,MTA3,MEIS2,POLR2A,RXRA,HNF4A,CBFB,HDAC1,MTA2,SOX6,GATAD2B,RCOR1,FOSL2,CBX3,XRCC5,IRF3,ZNF444,ZNF282,TBX21,EBF1,CEBPB,NCOA1,ATF4,MAX,SIN3B,ZKSCAN1,CC2D1A,MYNN,YY1,STAT3,MAFF,RUNX1,JUN,RB1,WRNIP1,TRIM22,ESRRA,RUNX…	chr1	31895173	31898785	chr1	31896540
chr1	31888300	31919425	0.216951296647691	-0.274353538434855	0.833333333333333	0.568181818181818	0.583212185906961	0.896599396693663	420	2.7137162560979e-60	chr1	31896702	31897529	Intron3	+	SERINC2	protein_coding	chr1	31896702	31897529	0.026570281124498	1	*	*	*	*	*	0	0	*	*	*	*	*	0	0	chr1-31896845:31896995	chr1	31896845	31896995	chr1	31896845	31896995	GATAD2A,ASH2L,CTCF,SMARCA4,FOS,JUND,SIN3A,ZNF316,BHLHE40,ZNF318,RELB,TRIM24,SKI,REST,IKZF1,ATF3,SKIL,MEF2B,ATF7,CBFA2T3,FOSL2,DPF2,TBL1XR1,SMC3,ZFP91,ZNF24,ZEB2,HNRNPLL,RAD21,IKZF2,SREBF2,MTA3,MEIS2,POLR2A,RXRA,HNF4A,CBFB,HDAC1,MTA2,SOX6,GATAD2B,RCOR1,FOSL2,CBX3,XRCC5,IRF3,ZNF444,ZNF282,TBX21,EBF1,CEBPB,NCOA1,ATF4,MAX,SIN3B,ZKSCAN1,CC2D1A,MYNN,YY1,STAT3,MAFF,RUNX1,JUN,RB1,WRNIP1,TRIM22,ESRRA,RUNX…	chr1	31895173	31898785	chr1	31896702
chr1	31888300	31919425	0.216951296647691	-0.274353538434855	0.833333333333333	0.568181818181818	0.583212185906961	0.896599396693663	420	2.7137162560979e-60	chr1	31897530	31897720	Exon4	+	SERINC2	protein_coding	chr1	31897530	31897720	0.00610441767068273	1	*	*	*	*	*	0	0	*	*	*	*	*	0	0	chr1-31897305:31897615	chr1	31897305	31897615	chr1	31897530	31897615	GATAD2A,ASH2L,CTCF,SMARCA4,FOS,JUND,SIN3A,ZNF316,BHLHE40,ZNF318,RELB,TRIM24,SKI,REST,IKZF1,ATF3,SKIL,MEF2B,ATF7,CBFA2T3,FOSL2,DPF2,TBL1XR1,SMC3,ZFP91,ZNF24,ZEB2,HNRNPLL,RAD21,IKZF2,SREBF2,MTA3,MEIS2,POLR2A,RXRA,HNF4A,CBFB,HDAC1,MTA2,SOX6,GATAD2B,RCOR1,FOSL2,CBX3,XRCC5,IRF3,ZNF444,ZNF282,TBX21,EBF1,CEBPB,NCOA1,ATF4,MAX,SIN3B,ZKSCAN1,CC2D1A,MYNN,YY1,STAT3,MAFF,RUNX1,JUN,RB1,WRNIP1,TRIM22,ESRRA,RUNX…	chr1	31895173	31898785	chr1	31897530
chr1	31888300	31919425	0.216951296647691	-0.274353538434855	0.833333333333333	0.568181818181818	0.583212185906961	0.896599396693663	420	2.7137162560979e-60	chr1	31897721	31898176	Intron4	+	SERINC2	protein_coding	chr1	31897721	31898176	0.0146184738955823	1	*	*	*	*	*	0	0	*	*	*	*	*	0	0	chr1-31897825:31898055	chr1	31897825	31898055	chr1	31897825	31898055	GATAD2A,ASH2L,CTCF,SMARCA4,FOS,JUND,SIN3A,ZNF316,BHLHE40,ZNF318,RELB,TRIM24,SKI,REST,IKZF1,ATF3,SKIL,MEF2B,ATF7,CBFA2T3,FOSL2,DPF2,TBL1XR1,SMC3,ZFP91,ZNF24,ZEB2,HNRNPLL,RAD21,IKZF2,SREBF2,MTA3,MEIS2,POLR2A,RXRA,HNF4A,CBFB,HDAC1,MTA2,SOX6,GATAD2B,RCOR1,FOSL2,CBX3,XRCC5,IRF3,ZNF444,ZNF282,TBX21,EBF1,CEBPB,NCOA1,ATF4,MAX,SIN3B,ZKSCAN1,CC2D1A,MYNN,YY1,STAT3,MAFF,RUNX1,JUN,RB1,WRNIP1,TRIM22,ESRRA,RUNX…	chr1	31895173	31898785	chr1	31897721
chr1	31888300	31919425	0.216951296647691	-0.274353538434855	0.833333333333333	0.568181818181818	0.583212185906961	0.896599396693663	420	2.7137162560979e-60	chr1	31898177	31898256	Exon5	+	SERINC2	protein_coding	chr1	31898177	31898256	0.00253815261044177	1	*	*	*	*	*	0	0	*	*	*	*	*	0	0	chr1-31898060:31898375	chr1	31898060	31898375	chr1	31898177	31898256	GATAD2A,ASH2L,CTCF,SMARCA4,FOS,JUND,SIN3A,ZNF316,BHLHE40,ZNF318,RELB,TRIM24,SKI,REST,IKZF1,ATF3,SKIL,MEF2B,ATF7,CBFA2T3,FOSL2,DPF2,TBL1XR1,SMC3,ZFP91,ZNF24,ZEB2,HNRNPLL,RAD21,IKZF2,SREBF2,MTA3,MEIS2,POLR2A,RXRA,HNF4A,CBFB,HDAC1,MTA2,SOX6,GATAD2B,RCOR1,FOSL2,CBX3,XRCC5,IRF3,ZNF444,ZNF282,TBX21,EBF1,CEBPB,NCOA1,ATF4,MAX,SIN3B,ZKSCAN1,CC2D1A,MYNN,YY1,STAT3,MAFF,RUNX1,JUN,RB1,WRNIP1,TRIM22,ESRRA,RUNX…	chr1	31895173	31898785	chr1	31898177
chr1	31888300	31919425	0.216951296647691	-0.274353538434855	0.833333333333333	0.568181818181818	0.583212185906961	0.896599396693663	420	2.7137162560979e-60	chr1	31898257	31898622	Intron5	+	SERINC2	protein_coding	chr1	31898257	31898622	0.0117269076305221	1	*	*	*	*	*	0	0	*	*	*	*	*	0	0	chr1-31898060:31898375	chr1	31898060	31898375	chr1	31898257	31898375	GATAD2A,ASH2L,CTCF,SMARCA4,FOS,JUND,SIN3A,ZNF316,BHLHE40,ZNF318,RELB,TRIM24,SKI,REST,IKZF1,ATF3,SKIL,MEF2B,ATF7,CBFA2T3,FOSL2,DPF2,TBL1XR1,SMC3,ZFP91,ZNF24,ZEB2,HNRNPLL,RAD21,IKZF2,SREBF2,MTA3,MEIS2,POLR2A,RXRA,HNF4A,CBFB,HDAC1,MTA2,SOX6,GATAD2B,RCOR1,FOSL2,CBX3,XRCC5,IRF3,ZNF444,ZNF282,TBX21,EBF1,CEBPB,NCOA1,ATF4,MAX,SIN3B,ZKSCAN1,CC2D1A,MYNN,YY1,STAT3,MAFF,RUNX1,JUN,RB1,WRNIP1,TRIM22,ESRRA,RUNX…	chr1	31895173	31898785	chr1	31898257
chr1	31888300	31919425	0.216951296647691	-0.274353538434855	0.833333333333333	0.568181818181818	0.583212185906961	0.896599396693663	420	2.7137162560979e-60	chr1	31898623	31898760	Exon6	+	SERINC2	protein_coding	chr1	31898623	31898760	0.00440160642570281	1	*	*	*	*	*	0	0	*	*	*	*	*	0	0	*	*	*	*	*	0	0	GATAD2A,ASH2L,CTCF,SMARCA4,FOS,JUND,SIN3A,ZNF316,BHLHE40,ZNF318,RELB,TRIM24,SKI,REST,IKZF1,ATF3,SKIL,MEF2B,ATF7,CBFA2T3,FOSL2,DPF2,TBL1XR1,SMC3,ZFP91,ZNF24,ZEB2,HNRNPLL,RAD21,IKZF2,SREBF2,MTA3,MEIS2,POLR2A,RXRA,HNF4A,CBFB,HDAC1,MTA2,SOX6,GATAD2B,RCOR1,FOSL2,CBX3,XRCC5,IRF3,ZNF444,ZNF282,TBX21,EBF1,CEBPB,NCOA1,ATF4,MAX,SIN3B,ZKSCAN1,CC2D1A,MYNN,YY1,STAT3,MAFF,RUNX1,JUN,RB1,WRNIP1,TRIM22,ESRRA,RUNX…	chr1	31895173	31898785	chr1	31898623
chr1	31888300	31919425	0.216951296647691	-0.274353538434855	0.833333333333333	0.568181818181818	0.583212185906961	0.896599396693663	420	2.7137162560979e-60	chr1	31898761	31899500	Intron6	+	SERINC2	protein_coding	chr1	31898761	31899500	0.0237429718875502	1	*	*	*	*	*	0	0	*	*	*	*	*	0	0	chr1-31898965:31899475	chr1	31898965	31899475	chr1	31898965	31899475	GATAD2A,ASH2L,CTCF,SMARCA4,FOS,JUND,SIN3A,ZNF316,BHLHE40,ZNF318,RELB,TRIM24,SKI,REST,IKZF1,ATF3,SKIL,MEF2B,ATF7,CBFA2T3,FOSL2,DPF2,TBL1XR1,SMC3,ZFP91,ZNF24,ZEB2,HNRNPLL,RAD21,IKZF2,SREBF2,MTA3,MEIS2,POLR2A,RXRA,HNF4A,CBFB,HDAC1,MTA2,SOX6,GATAD2B,RCOR1,FOSL2,CBX3,XRCC5,IRF3,ZNF444,ZNF282,TBX21,EBF1,CEBPB,NCOA1,ATF4,MAX,SIN3B,ZKSCAN1,CC2D1A,MYNN,YY1,STAT3,MAFF,RUNX1,JUN,RB1,WRNIP1,TRIM22,ESRRA,RUNX…	chr1	31895173	31898785	chr1	31898761
chr1	31888300	31919425	0.216951296647691	-0.274353538434855	0.833333333333333	0.568181818181818	0.583212185906961	0.896599396693663	420	2.7137162560979e-60	chr1	31899501	31899670	Exon7	+	SERINC2	protein_coding	chr1	31899501	31899670	0.00542971887550201	1	*	*	*	*	*	0	0	*	*	*	*	*	0	0	chr1-31899545:31899835	chr1	31899545	31899835	chr1	31899545	31899670	ZNF687,ATF7,JUND,ATF3,CREB1,ATF2,CREM,FOS,E2F1,ZBTB33,MLLT1	chr1	31898829	31900050	chr1	31899501
chr1	31888300	31919425	0.216951296647691	-0.274353538434855	0.833333333333333	0.568181818181818	0.583212185906961	0.896599396693663	420	2.7137162560979e-60	chr1	31899671	31901824	Intron7	+	SERINC2	protein_coding	chr1	31899671	31901824	0.0691726907630522	1	*	*	*	*	*	0	0	*	*	*	*	*	0	0	chr1-31899545:31899835	chr1	31899545	31899835	chr1	31899671	31899835	ZNF687,ATF7,JUND,ATF3,CREB1,ATF2,CREM,FOS,E2F1,ZBTB33,MLLT1	chr1	31898829	31900050	chr1	31899671
chr1	31888300	31919425	0.216951296647691	-0.274353538434855	0.833333333333333	0.568181818181818	0.583212185906961	0.896599396693663	420	2.7137162560979e-60	chr1	31901825	31901915	Exon8	+	SERINC2	protein_coding	chr1	31901825	31901915	0.00289156626506024	1	*	*	*	*	*	0	0	*	*	*	*	*	0	0	*	*	*	*	*	0	0	BHLHE40,IKZF1,ATF7,NBN,MLLT1,RUNX3,TBX21	chr1	31901177	31901953	chr1	31901825
chr1	31888300	31919425	0.216951296647691	-0.274353538434855	0.833333333333333	0.568181818181818	0.583212185906961	0.896599396693663	420	2.7137162560979e-60	chr1	31901916	31902243	Intron8	+	SERINC2	protein_coding	chr1	31901916	31902243	0.0105060240963855	1	*	*	*	*	*	0	0	*	*	*	*	*	0	0	chr1-31902005:31902155	chr1	31902005	31902155	chr1	31902005	31902155	BHLHE40,IKZF1,ATF7,NBN,MLLT1,RUNX3,TBX21	chr1	31901177	31901953	chr1	31901916
chr1	31888300	31919425	0.216951296647691	-0.274353538434855	0.833333333333333	0.568181818181818	0.583212185906961	0.896599396693663	420	2.7137162560979e-60	chr1	31902244	31902385	Exon9	+	SERINC2	protein_coding	chr1	31902244	31902385	0.00453012048192771	1	*	*	*	*	*	0	0	*	*	*	*	*	0	0	chr1-31902165:31902315	chr1	31902165	31902315	chr1	31902244	31902315	BCOR	chr1	31902334	31902764	chr1	31902334
chr1	31888300	31919425	0.216951296647691	-0.274353538434855	0.833333333333333	0.568181818181818	0.583212185906961	0.896599396693663	420	2.7137162560979e-60	chr1	31902386	31905813	Intron9	+	SERINC2	protein_coding	chr1	31902386	31905813	0.110104417670683	1	*	*	*	*	*	0	0	chr1:31904621-31905133	chr1	31904621	31905133	chr1	31904621	31905133	chr1-31902385:31902535	chr1	31902385	31902535	chr1	31902386	31902535	BCOR	chr1	31902334	31902764	chr1	31902386
chr1	31888300	31919425	0.216951296647691	-0.274353538434855	0.833333333333333	0.568181818181818	0.583212185906961	0.896599396693663	420	2.7137162560979e-60	chr1	31905814	31906032	Exon10	+	SERINC2	protein_coding	chr1	31905814	31906032	0.00700401606425703	1	*	*	*	*	*	0	0	*	*	*	*	*	0	0	chr1-31905605:31905855	chr1	31905605	31905855	chr1	31905814	31905855	PCBP2,IKZF1,IKZF2,EBF1,BMI1,CTCF,MLLT1,PCBP2,NBN,MTA2,HDAC2,HNRNPK,TBX21,GATAD2B,ZNF143,KDM1A,BCOR,ZMYM3,RBM25,AGO2,HNRNPL,HNRNPH1,E2F1,CREM,NR2F6,KDM1A,NR2F1,NCOR1,USF1,NR2C1,NR2F2,RXRA,HNF4A,ESRRA,RBFOX2,HNRNPLL,HNRNPL,PRPF4,ASH2L,ZNF143,CREM,YY1,XRCC5,PCBP1,U2AF1,HDAC2,TAF1,KDM1A,NR2F6,RBM39,NCOR1,HNF1A,MAFF,REST,RAD21,GATA4,MNT,TFAP4,FOSL2,ETV4,TCF12,EBF1,HNF4G,JUND,RXRA,FOXA1,ZBTB7A,SP1,HNF4…	chr1	31903678	31909011	chr1	31905814
chr1	31888300	31919425	0.216951296647691	-0.274353538434855	0.833333333333333	0.568181818181818	0.583212185906961	0.896599396693663	420	2.7137162560979e-60	chr1	31906033	31906910	Intron10	+	SERINC2	protein_coding	chr1	31906033	31906910	0.0281767068273092	1	*	*	*	*	*	0	0	*	*	*	*	*	0	0	chr1-31905945:31906095	chr1	31905945	31906095	chr1	31906033	31906095	PCBP2,IKZF1,IKZF2,EBF1,BMI1,CTCF,MLLT1,PCBP2,NBN,MTA2,HDAC2,HNRNPK,TBX21,GATAD2B,ZNF143,KDM1A,BCOR,ZMYM3,RBM25,AGO2,HNRNPL,HNRNPH1,E2F1,CREM,NR2F6,KDM1A,NR2F1,NCOR1,USF1,NR2C1,NR2F2,RXRA,HNF4A,ESRRA,RBFOX2,HNRNPLL,HNRNPL,PRPF4,ASH2L,ZNF143,CREM,YY1,XRCC5,PCBP1,U2AF1,HDAC2,TAF1,KDM1A,NR2F6,RBM39,NCOR1,HNF1A,MAFF,REST,RAD21,GATA4,MNT,TFAP4,FOSL2,ETV4,TCF12,EBF1,HNF4G,JUND,RXRA,FOXA1,ZBTB7A,SP1,HNF4…	chr1	31903678	31909011	chr1	31906033
chr1	31888300	31919425	0.216951296647691	-0.274353538434855	0.833333333333333	0.568181818181818	0.583212185906961	0.896599396693663	420	2.7137162560979e-60	chr1	31906911	31907524	LastExon	+	SERINC2	protein_coding	chr1	31906911	31907524	0.0196947791164659	1	*	*	*	*	*	0	0	*	*	*	*	*	0	0	chr1-31906105:31907615	chr1	31906105	31907615	chr1	31906911	31907524	PCBP2,IKZF1,IKZF2,EBF1,BMI1,CTCF,MLLT1,PCBP2,NBN,MTA2,HDAC2,HNRNPK,TBX21,GATAD2B,ZNF143,KDM1A,BCOR,ZMYM3,RBM25,AGO2,HNRNPL,HNRNPH1,E2F1,CREM,NR2F6,KDM1A,NR2F1,NCOR1,USF1,NR2C1,NR2F2,RXRA,HNF4A,ESRRA,RBFOX2,HNRNPLL,HNRNPL,PRPF4,ASH2L,ZNF143,CREM,YY1,XRCC5,PCBP1,U2AF1,HDAC2,TAF1,KDM1A,NR2F6,RBM39,NCOR1,HNF1A,MAFF,REST,RAD21,GATA4,MNT,TFAP4,FOSL2,ETV4,TCF12,EBF1,HNF4G,JUND,RXRA,FOXA1,ZBTB7A,SP1,HNF4…	chr1	31903678	31909011	chr1	31906911
chr1	46859773	46860386	0.306547619047619	-0.169990643237014	0.75	0.452380952380952	0.482205555876069	0.633975492128552	72	9.92097755634616e-25	chr1	46858936	46859936	Promoter	+	FAAH	protein_coding	chr1	46859773	46859936	0.265905383360522	0.163	CpG: 71	chr1	46859724	46860291	chr1	46859773	46859936	*	*	*	*	*	0	0	chr1-46859840:46860650	chr1	46859840	46860650	chr1	46859840	46859936	SAP30,TRIM28,CBX1,TRIM24,CBX3,TAF1,ZNF143,SETDB1,XRCC3,CBX5,ZNF280A,ARNT,HDAC2,TCF12,USF2,ZBTB33,USF1,SP1,RNF2,RBM39,PCBP1,ZNF217,HNRNPK,REST,TAF15,CTCF,TCF7L2,SRSF4,RBBP5,NFIB,EP300,CTBP1,ASH2L,POLR2A,TAF7,RBFOX2,FUS,JUND,NEUROD1,SP1,GABPA,SKI,ZBTB33,TFAP4,SMARCE1,BHLHE40,EGR1,SIN3A,ZHX2,YY1,NRF1,E2F6,HNRNPLL,TAF1,MXI1,GATA3,BRCA1,FOXA1,HCFC1,TBP,ZFX,ELF1,MYC,NANOG,POLR2G,USF1,MNT,EZH2,KDM4A,CHD…	chr1	46858723	46860824	chr1	46859773
chr1	46859773	46860386	0.306547619047619	-0.169990643237014	0.75	0.452380952380952	0.482205555876069	0.633975492128552	72	9.92097755634616e-25	chr1	46859937	46860215	FirstExon	+	FAAH	protein_coding	chr1	46859937	46860215	0.453507340946166	1	CpG: 71	chr1	46859724	46860291	chr1	46859937	46860215	*	*	*	*	*	0	0	chr1-46859840:46860650	chr1	46859840	46860650	chr1	46859937	46860215	SAP30,TRIM28,CBX1,TRIM24,CBX3,TAF1,ZNF143,SETDB1,XRCC3,CBX5,ZNF280A,ARNT,HDAC2,TCF12,USF2,ZBTB33,USF1,SP1,RNF2,RBM39,PCBP1,ZNF217,HNRNPK,REST,TAF15,CTCF,TCF7L2,SRSF4,RBBP5,NFIB,EP300,CTBP1,ASH2L,POLR2A,TAF7,RBFOX2,FUS,JUND,NEUROD1,SP1,GABPA,SKI,ZBTB33,TFAP4,SMARCE1,BHLHE40,EGR1,SIN3A,ZHX2,YY1,NRF1,E2F6,HNRNPLL,TAF1,MXI1,GATA3,BRCA1,FOXA1,HCFC1,TBP,ZFX,ELF1,MYC,NANOG,POLR2G,USF1,MNT,EZH2,KDM4A,CHD…	chr1	46858723	46860824	chr1	46859937
chr1	46859773	46860386	0.306547619047619	-0.169990643237014	0.75	0.452380952380952	0.482205555876069	0.633975492128552	72	9.92097755634616e-25	chr1	46860216	46867762	Intron1	+	FAAH	protein_coding	chr1	46860216	46860386	0.277324632952692	0.022528491916247	CpG: 71	chr1	46859724	46860291	chr1	46860216	46860291	*	*	*	*	*	0	0	chr1-46859840:46860650	chr1	46859840	46860650	chr1	46860216	46860386	SAP30,TRIM28,CBX1,TRIM24,CBX3,TAF1,ZNF143,SETDB1,XRCC3,CBX5,ZNF280A,ARNT,HDAC2,TCF12,USF2,ZBTB33,USF1,SP1,RNF2,RBM39,PCBP1,ZNF217,HNRNPK,REST,TAF15,CTCF,TCF7L2,SRSF4,RBBP5,NFIB,EP300,CTBP1,ASH2L,POLR2A,TAF7,RBFOX2,FUS,JUND,NEUROD1,SP1,GABPA,SKI,ZBTB33,TFAP4,SMARCE1,BHLHE40,EGR1,SIN3A,ZHX2,YY1,NRF1,E2F6,HNRNPLL,TAF1,MXI1,GATA3,BRCA1,FOXA1,HCFC1,TBP,ZFX,ELF1,MYC,NANOG,POLR2G,USF1,MNT,EZH2,KDM4A,CHD…	chr1	46858723	46860824	chr1	46860216
chr1	62784588	62785189	-0.21634906231095	-0.162260576528542	0.325757575757575	0.575757575757576	0.526820307325293	0.712609789910823	75	3.35915823370503e-15	chr1	62747307	62784776	Intron1	-	KANK4	protein_coding	chr1	62784588	62784776	0.312811980033278	0.00501748111772398	CpG: 103	chr1	62784136	62785133	chr1	62784588	62784776	*	*	*	*	*	0	0	chr1-62784525:62785495	chr1	62784525	62785495	chr1	62784588	62784776	EZH2,NR2F6,RXRA,HNF4A,HNRNPL,SIN3A,POLR2A,SUZ12,ASH2L,AGO2,HDAC1,RBM39,RBFOX2,KDM4A,FUS,CTCF,NRF1,HDAC6,MAX,MXI1,HNRNPLL,YY1,TAF1,LEF1,TAF15,ARNT,SMC3,KDM1A,NCOR1,EP300,SKI,RAD21,NR2F6,JUND,HNF4G,MYC,FOSL2,CEBPB,FOXA1,HNF4A,ZBTB7A,ZNF384,FOXA2	chr1	62783700	62785574	chr1	62784588
chr1	62784588	62785189	-0.21634906231095	-0.162260576528542	0.325757575757575	0.575757575757576	0.526820307325293	0.712609789910823	75	3.35915823370503e-15	chr1	62784777	62785085	FirstExon	-	KANK4	protein_coding	chr1	62784777	62785085	0.512479201331115	1	CpG: 103	chr1	62784136	62785133	chr1	62784777	62785085	*	*	*	*	*	0	0	chr1-62784525:62785495	chr1	62784525	62785495	chr1	62784777	62785085	EZH2,NR2F6,RXRA,HNF4A,HNRNPL,SIN3A,POLR2A,SUZ12,ASH2L,AGO2,HDAC1,RBM39,RBFOX2,KDM4A,FUS,CTCF,NRF1,HDAC6,MAX,MXI1,HNRNPLL,YY1,TAF1,LEF1,TAF15,ARNT,SMC3,KDM1A,NCOR1,EP300,SKI,RAD21,NR2F6,JUND,HNF4G,MYC,FOSL2,CEBPB,FOXA1,HNF4A,ZBTB7A,ZNF384,FOXA2	chr1	62783700	62785574	chr1	62784777
chr1	62784588	62785189	-0.21634906231095	-0.162260576528542	0.325757575757575	0.575757575757576	0.526820307325293	0.712609789910823	75	3.35915823370503e-15	chr1	62785086	62786086	Promoter	-	KANK4	protein_coding	chr1	62785086	62785189	0.171381031613977	0.103	CpG: 103	chr1	62784136	62785133	chr1	62785086	62785133	*	*	*	*	*	0	0	chr1-62784525:62785495	chr1	62784525	62785495	chr1	62785086	62785189	EZH2,NR2F6,RXRA,HNF4A,HNRNPL,SIN3A,POLR2A,SUZ12,ASH2L,AGO2,HDAC1,RBM39,RBFOX2,KDM4A,FUS,CTCF,NRF1,HDAC6,MAX,MXI1,HNRNPLL,YY1,TAF1,LEF1,TAF15,ARNT,SMC3,KDM1A,NCOR1,EP300,SKI,RAD21,NR2F6,JUND,HNF4G,MYC,FOSL2,CEBPB,FOXA1,HNF4A,ZBTB7A,ZNF384,FOXA2	chr1	62783700	62785574	chr1	62785086
chr1	68852538	68859757	0.205971479500891	-0.360552526356983	0.882352941176471	0.657072368421052	0.451651615043887	0.842039593292269	119	2.69091080487226e-23	*	*	*	InterGenic	*	*	*	*	*	*	*	*	*	*	*	*	*	0	0	chr1:68858132-68858533	chr1	68858132	68858533	chr1	68858132	68858533	chr1-68853640:68853790	chr1	68853640	68853790	chr1	68853640	68853790	JUND	chr1	68857764	68858160	chr1	68857764
chr1	93912687	93913248	0.219782349433512	0.117647089477179	0.458333333333333	0.185128518971848	0.639764080904313	0.558485726421912	13	0.0303467893868292	chr1	93912838	93913838	Promoter	+	FNBP1L	protein_coding	chr1	93912838	93913248	0.730837789661319	0.41	*	*	*	*	*	0	0	*	*	*	*	*	0	0	chr1-93912405:93913035	chr1	93912405	93913035	chr1	93912838	93913035	PYGO2,HNRNPLL,CTCF,ZSCAN29,ZEB2,POLR2A,SIN3A,MNT,GATAD2B,CTBP1,MAX,MTA3,FOS,HMBOX1,HDAC1,NRF1,MEIS2,TRIM28,MYC,YY1,DACH1,TRIM24,TBP,CBFA2T3,ELF4,SOX6,ARID1B,NR2F2,CC2D1A,PHB2,IRF1,BCOR,TCF12,SMARCE1,FOXM1,ZBTB11,KLF16,STAT5A,CREM,SMAD1,EP300,IKZF1,TAL1,DPF2,IRF2,NCOR1,GATA2,JUN,CBFA2T2,GATA1,NFIC,TEAD4,SMARCA4,MTA2,GABPA,RNF2,NFIB,FOXA1,FOXA2,GABPB1,FOXK2,EGR1,BHLHE40,EZH2,CBX3,ZEB2,GMEB1,KDM5B,P…	chr1	93912046	93915722	chr1	93912838
chr1	102062388	102068738	0.216165413533834	-0.329349720865721	0.833333333333333	0.644444444444444	0.539746901545616	0.877630711753643	74	1.49457984154362e-11	*	*	*	InterGenic	*	*	*	*	*	*	*	*	*	*	*	*	*	0	0	*	*	*	*	*	0	0	chr1-102066300:102066450	chr1	102066300	102066450	chr1	102066300	102066450	*	*	*	*	*	0
chr1	113391842	113393273	0.237079184447606	-0.0343292946580239	0.675675675675676	0.43859649122807	0.62123277892908	0.661040868247124	98	6.68536829073387e-29	chr1	113391673	113392301	Intron1	-	RP11-426L16.8	lincRNA	chr1	113391842	113392301	0.320754716981132	0.730891719745223	CpG: 71	chr1	113392142	113392807	chr1	113392142	113392301	*	*	*	*	*	0	0	chr1-113391885:113392235	chr1	113391885	113392235	chr1	113391885	113392235	RNF2,TAF1,ASH2L,POLR2A,BACH1,USF2,USF1,TCF12,HDAC6,L3MBTL2,HNRNPLL,ZBTB7A,KDM4A,RBBP5,MXI1,TAF15,YY1,MYC,NRF1,ZBTB33	chr1	113391833	113393029	chr1	113391842
chr1	113391842	113393273	0.237079184447606	-0.0343292946580239	0.675675675675676	0.43859649122807	0.62123277892908	0.661040868247124	98	6.68536829073387e-29	chr1	113392302	113393265	FirstExon	-	RP11-426L16.8	lincRNA	chr1	113392302	113393265	0.672955974842767	1	CpG: 71	chr1	113392142	113392807	chr1	113392302	113392807	*	*	*	*	*	0	0	chr1-113392280:113393270	chr1	113392280	113393270	chr1	113392302	113393265	RNF2,TAF1,ASH2L,POLR2A,BACH1,USF2,USF1,TCF12,HDAC6,L3MBTL2,HNRNPLL,ZBTB7A,KDM4A,RBBP5,MXI1,TAF15,YY1,MYC,NRF1,ZBTB33	chr1	113391833	113393029	chr1	113392302
chr1	113391842	113393273	0.237079184447606	-0.0343292946580239	0.675675675675676	0.43859649122807	0.62123277892908	0.661040868247124	98	6.68536829073387e-29	chr1	113393266	113394266	Promoter	-	RP11-426L16.8	lincRNA	chr1	113393266	113393273	0.00489168413696716	0.007	*	*	*	*	*	0	0	*	*	*	*	*	0	0	chr1-113392280:113393270	chr1	113392280	113393270	chr1	113393266	113393270	*	*	*	*	*	0
chr1	113391842	113393273	0.237079184447606	-0.0343292946580239	0.675675675675676	0.43859649122807	0.62123277892908	0.661040868247124	98	6.68536829073387e-29	chr1	113391649	113392649	Promoter	+	RP3-522D1.1	lincRNA	chr1	113391842	113392649	0.563941299790356	0.807	CpG: 71	chr1	113392142	113392807	chr1	113392142	113392649	*	*	*	*	*	0	0	chr1-113391885:113392235	chr1	113391885	113392235	chr1	113391885	113392235	RNF2,TAF1,ASH2L,POLR2A,BACH1,USF2,USF1,TCF12,HDAC6,L3MBTL2,HNRNPLL,ZBTB7A,KDM4A,RBBP5,MXI1,TAF15,YY1,MYC,NRF1,ZBTB33	chr1	113391833	113393029	chr1	113391842
chr1	113391842	113393273	0.237079184447606	-0.0343292946580239	0.675675675675676	0.43859649122807	0.62123277892908	0.661040868247124	98	6.68536829073387e-29	chr1	113392650	113393049	FirstExon	+	RP3-522D1.1	lincRNA	chr1	113392650	113393049	0.278825995807128	1	CpG: 71	chr1	113392142	113392807	chr1	113392650	113392807	*	*	*	*	*	0	0	chr1-113392280:113393270	chr1	113392280	113393270	chr1	113392650	113393049	RNF2,TAF1,ASH2L,POLR2A,BACH1,USF2,USF1,TCF12,HDAC6,L3MBTL2,HNRNPLL,ZBTB7A,KDM4A,RBBP5,MXI1,TAF15,YY1,MYC,NRF1,ZBTB33	chr1	113391833	113393029	chr1	113392650
chr1	113391842	113393273	0.237079184447606	-0.0343292946580239	0.675675675675676	0.43859649122807	0.62123277892908	0.661040868247124	98	6.68536829073387e-29	chr1	113393050	113419561	Intron1	+	RP3-522D1.1	lincRNA	chr1	113393050	113393273	0.155835080363382	0.00841160273094187	*	*	*	*	*	0	0	*	*	*	*	*	0	0	chr1-113392280:113393270	chr1	113392280	113393270	chr1	113393050	113393270	*	*	*	*	*	0
chr1	142535644	142543262	0.523326572008113	0.782567343631965	0.530192608016658	0.00521623419827012	0.861216051393835	0.0379051009489237	55	2.27488677294897e-19	*	*	*	InterGenic	*	*	*	*	*	*	*	*	*	*	*	*	*	0	0	chr1:142538903-142539547	chr1	142538903	142539547	chr1	142538903	142539547	chr1-142542560:142542790	chr1	142542560	142542790	chr1	142542560	142542790	*	*	*	*	*	0
chr1	152080242	152081674	0.226006191950465	-0.194455745495105	0.7	0.5	0.618854920710318	0.813809343948675	110	1.17379082769234e-21	chr1	152078793	152085554	LastExon	-	TCHH	protein_coding	chr1	152080242	152081674	1	0.21180298772371	CpG: 131	chr1	152079997	152081705	chr1	152080242	152081674	*	*	*	*	*	0	0	chr1-152081425:152082395	chr1	152081425	152082395	chr1	152081425	152081674	EZH2,POLR2A,HDAC2,TRIM28,CTCF,ASH2L,KDM1A,TCF12,SUZ12,SIN3A,L3MBTL2,POLR2A,YY1,CBX8,SPI1,RNF2,HCFC1,FOXA1,RCOR1,ZBTB33,ZHX2,SUZ12,ZNF687,MYC,CTCF,GATA3,ZNF592,L3MBTL2,ZNF217,NCOA3,NFIB,NEUROD1,SIN3A,CTBP1,ZNF444,SUZ12,ZBTB11,ZKSCAN1,CREB1,ZNF512B,RCOR1,ZBTB7B,DPF2,BMI1,CUX1,CHD1,E2F8,ZNF207,GATAD2B,ZNF217,ESRRA,HES1,ZBTB1,ZNF8,MTA1,RAD51,ZKSCAN1,NCOA3,ZBTB33,ZNF512B,NEUROD1,L3MBTL2,HCFC1,TRIM28,Z…	chr1	152079747	152086100	chr1	152080242
chr1	154474131	154474847	0.256768640725149	-0.189694874401803	0.8125	0.535897435897436	0.563902213948865	0.756964652180723	89	2.28777177025293e-26	chr1	154473912	154474589	FirstExon	-	SHE	protein_coding	chr1	154474131	154474589	0.639664804469274	0.676514032496307	CpG: 192	chr1	154474107	154475699	chr1	154474131	154474589	*	*	*	*	*	0	0	chr1-154473745:154475195	chr1	154473745	154475195	chr1	154474131	154474589	EZH2,REST,CBX2,SUZ12,ZFX,POLR2A,ASH2L,CTCF,RBM39,MTA1,GABPA,YY1,EP300,CEBPB,EGR1,RBBP5,KDM4A,TAF1,YY1,KDM4A,BHLHE40,TAF7,MYC,JUN,USF2,USF1,TCF12,HDAC2,KDM1A,ATF3,HNRNPL,RNF2,CTCF	chr1	154473002	154475979	chr1	154474131
chr1	154474131	154474847	0.256768640725149	-0.189694874401803	0.8125	0.535897435897436	0.563902213948865	0.756964652180723	89	2.28777177025293e-26	chr1	154474590	154475590	Promoter	-	SHE	protein_coding	chr1	154474590	154474847	0.358938547486034	0.257	CpG: 192	chr1	154474107	154475699	chr1	154474590	154474847	*	*	*	*	*	0	0	chr1-154473745:154475195	chr1	154473745	154475195	chr1	154474590	154474847	EZH2,REST,CBX2,SUZ12,ZFX,POLR2A,ASH2L,CTCF,RBM39,MTA1,GABPA,YY1,EP300,CEBPB,EGR1,RBBP5,KDM4A,TAF1,YY1,KDM4A,BHLHE40,TAF7,MYC,JUN,USF2,USF1,TCF12,HDAC2,KDM1A,ATF3,HNRNPL,RNF2,CTCF	chr1	154473002	154475979	chr1	154474590
chr1	154474131	154474847	0.256768640725149	-0.189694874401803	0.8125	0.535897435897436	0.563902213948865	0.756964652180723	89	2.28777177025293e-26	chr1	154473694	154474694	Promoter	+	TDRD10	protein_coding	chr1	154474131	154474694	0.786312849162011	0.563	CpG: 192	chr1	154474107	154475699	chr1	154474131	154474694	*	*	*	*	*	0	0	chr1-154473745:154475195	chr1	154473745	154475195	chr1	154474131	154474694	EZH2,REST,CBX2,SUZ12,ZFX,POLR2A,ASH2L,CTCF,RBM39,MTA1,GABPA,YY1,EP300,CEBPB,EGR1,RBBP5,KDM4A,TAF1,YY1,KDM4A,BHLHE40,TAF7,MYC,JUN,USF2,USF1,TCF12,HDAC2,KDM1A,ATF3,HNRNPL,RNF2,CTCF	chr1	154473002	154475979	chr1	154474131
chr1	154474131	154474847	0.256768640725149	-0.189694874401803	0.8125	0.535897435897436	0.563902213948865	0.756964652180723	89	2.28777177025293e-26	chr1	154474695	154475505	FirstExon	+	TDRD10	protein_coding	chr1	154474695	154474847	0.212290502793296	0.187654320987654	CpG: 192	chr1	154474107	154475699	chr1	154474695	154474847	*	*	*	*	*	0	0	chr1-154473745:154475195	chr1	154473745	154475195	chr1	154474695	154474847	EZH2,REST,CBX2,SUZ12,ZFX,POLR2A,ASH2L,CTCF,RBM39,MTA1,GABPA,YY1,EP300,CEBPB,EGR1,RBBP5,KDM4A,TAF1,YY1,KDM4A,BHLHE40,TAF7,MYC,JUN,USF2,USF1,TCF12,HDAC2,KDM1A,ATF3,HNRNPL,RNF2,CTCF	chr1	154473002	154475979	chr1	154474695
chr1	197886878	197887437	0.364583333333333	-0.155755043880801	0.769230769230769	0.387096774193548	0.554832593066821	0.671303983766849	40	6.09500963786956e-09	chr1	197881690	197887008	Intron1	+	LHX9	protein_coding	chr1	197886878	197887008	0.232558139534884	0.024445280180519	*	*	*	*	*	0	0	*	*	*	*	*	0	0	chr1-197886805:197888215	chr1	197886805	197888215	chr1	197886878	197887008	EZH2,SUZ12,RNF2,FOXA2,CTCF,TCF12,CBX8,KDM4A,PCBP1,RNF2,CTCF,RBBP5,HDAC2,CHD1,SP1,SMARCA4,KDM4A,CBX8,SP1,SIN3A,NRF1,CTCF,ETS1,EZH2,RBM39,SMARCA4,EZH2,CTCF,POLR2A,ZNF444,GABPB1,EZH2,U2AF1,RBM39,ZNF184,IKZF1,TCF12,ZNF217,ZNF512B,U2AF2,PTBP1,ASH2L,MCM3,FIP1L1,TRIM22,HNRNPL,CTBP1,HDAC2,TAF15,XRCC5,RAD21,YY1,SMC3,SIN3A,EGR1,HNRNPLL,RNF2,ZNF143,KDM4A,MXI1,L3MBTL2,CBX3,SMARCA4,YY1,TRIM28,NRF1,USF1,PKNOX1…	chr1	197876192	197891247	chr1	197886878
chr1	197886878	197887437	0.364583333333333	-0.155755043880801	0.769230769230769	0.387096774193548	0.554832593066821	0.671303983766849	40	6.09500963786956e-09	chr1	197887009	197887127	Exon2	+	LHX9	protein_coding	chr1	197887009	197887127	0.211091234347048	1	CpG: 58	chr1	197887088	197887791	chr1	197887088	197887127	*	*	*	*	*	0	0	chr1-197886805:197888215	chr1	197886805	197888215	chr1	197887009	197887127	EZH2,SUZ12,RNF2,FOXA2,CTCF,TCF12,CBX8,KDM4A,PCBP1,RNF2,CTCF,RBBP5,HDAC2,CHD1,SP1,SMARCA4,KDM4A,CBX8,SP1,SIN3A,NRF1,CTCF,ETS1,EZH2,RBM39,SMARCA4,EZH2,CTCF,POLR2A,ZNF444,GABPB1,EZH2,U2AF1,RBM39,ZNF184,IKZF1,TCF12,ZNF217,ZNF512B,U2AF2,PTBP1,ASH2L,MCM3,FIP1L1,TRIM22,HNRNPL,CTBP1,HDAC2,TAF15,XRCC5,RAD21,YY1,SMC3,SIN3A,EGR1,HNRNPLL,RNF2,ZNF143,KDM4A,MXI1,L3MBTL2,CBX3,SMARCA4,YY1,TRIM28,NRF1,USF1,PKNOX1…	chr1	197876192	197891247	chr1	197887009
chr1	197886878	197887437	0.364583333333333	-0.155755043880801	0.769230769230769	0.387096774193548	0.554832593066821	0.671303983766849	40	6.09500963786956e-09	chr1	197887128	197889101	Intron2	+	LHX9	protein_coding	chr1	197887128	197887437	0.552772808586762	0.156614292954891	CpG: 58	chr1	197887088	197887791	chr1	197887128	197887437	*	*	*	*	*	0	0	chr1-197886805:197888215	chr1	197886805	197888215	chr1	197887128	197887437	EZH2,SUZ12,RNF2,FOXA2,CTCF,TCF12,CBX8,KDM4A,PCBP1,RNF2,CTCF,RBBP5,HDAC2,CHD1,SP1,SMARCA4,KDM4A,CBX8,SP1,SIN3A,NRF1,CTCF,ETS1,EZH2,RBM39,SMARCA4,EZH2,CTCF,POLR2A,ZNF444,GABPB1,EZH2,U2AF1,RBM39,ZNF184,IKZF1,TCF12,ZNF217,ZNF512B,U2AF2,PTBP1,ASH2L,MCM3,FIP1L1,TRIM22,HNRNPL,CTBP1,HDAC2,TAF15,XRCC5,RAD21,YY1,SMC3,SIN3A,EGR1,HNRNPLL,RNF2,ZNF143,KDM4A,MXI1,L3MBTL2,CBX3,SMARCA4,YY1,TRIM28,NRF1,USF1,PKNOX1…	chr1	197876192	197891247	chr1	197887128
chr1	200475572	200475905	0.266666666666667	0.304974356654933	0.3	0.0277777777777778	0.61412366439237	0.277181183059022	12	0.0193674796349728	*	*	*	InterGenic	*	*	*	*	*	*	*	*	*	*	*	*	*	0	0	*	*	*	*	*	0	0	*	*	*	*	*	0	0	YY1,L3MBTL2,MYC,PKNOX1,E4F1	chr1	200475569	200476285	chr1	200475572
chr1	221068543	221069426	0.236842105263158	0.144106426529031	0.466666666666667	0.205128205128205	0.653049305675748	0.476918910502068	42	6.27281234372971e-10	*	*	*	InterGenic	*	*	*	*	*	*	*	*	CpG: 31	chr1	221068782	221069159	chr1	221068782	221069159	*	*	*	*	*	0	0	chr1-221069385:221070055	chr1	221069385	221070055	chr1	221069385	221069426	CBX8,EZH2,SUZ12,RNF2,CTCF,GABPA,NR2F2,SP1,EP300,POLR2A,IKZF1,RXRA,CREM,FOS,MAX,REST,GATA2,ZBTB40,SPI1,RNF2,ASH2L,CTCF,RBBP5,TBP,KDM4A,EGR1,ZNF143,EGR1,SP1,CBX8,IKZF1,NFIC,ATF2,CBFB,MEF2A,BATF,RUNX3,JUNB,USF2,USF1,IKZF2,IKZF1,CTCF,POLR2A,L3MBTL2,KDM4A,NBN,ZNF316,EP300,NRF1,MLLT1,HNRNPLL,YY1,RBFOX2,MGA,RBBP5,REST,EGR1,POLR2G,HDAC1,TAF1,MYC,RFX5,MAX,SAFB,MXI1,BACH1,SMC3,SP1,TBP,HNF4A,RXRA,NFYB,MITF,…	chr1	221049138	221070480	chr1	221068543
chr1	224198132	224204227	0.373027259684362	-0.429902236789742	0.878048780487805	0.514285714285714	0.464425103585871	0.905196479294246	126	3.54668690324603e-41	chr1	224196429	224198314	FirstExon	+	RP11-504P24.6	lincRNA	chr1	224198132	224198314	0.0298605414273995	0.096551724137931	*	*	*	*	*	0	0	*	*	*	*	*	0	0	*	*	*	*	*	0	0	*	*	*	*	*	0
chr1	228253615	228261471	0.310480693459417	-0.134843139869369	0.758620689655172	0.428571428571429	0.774028242539289	0.897886896562729	120	2.57698591298122e-25	*	*	*	InterGenic	*	*	*	*	*	*	*	*	*	*	*	*	*	0	0	*	*	*	*	*	0	0	chr1-228260525:228261095	chr1	228260525	228261095	chr1	228260525	228261095	CTCF,JUND,NCOR1,NFIB,ZNF444,POLR2A,ELF4,MTA2,HES1,MCM5,PRDM10,NR2C1,NR2F1,ZNF316,MAFK,AGO1,MAFF,POLR2G,SUZ12,EZH2,TAF15,CTCF,NR2F1,CC2D1A,REST,MYC,RAD21,SMC3,POLR2A	chr1	228259462	228262453	chr1	228259462
chr1	229547362	229552223	0.200127551020408	-0.363984590504768	0.854497354497354	0.633963750985028	0.518983509325907	0.878732574897937	79	1.65215771839984e-17	*	*	*	InterGenic	*	*	*	*	*	*	*	*	*	*	*	*	*	0	0	chr1:229547907-229548085	chr1	229547907	229548085	chr1	229547907	229548085	chr1-229551480:229551750	chr1	229551480	229551750	chr1	229551480	229551750	MCM7	chr1	229551237	229551573	chr1	229551237
chr1	230528473	230535111	0.202711152670136	-0.239314607741997	0.8	0.55959595959596	0.670844515551782	0.879158342202135	111	2.08913151901194e-17	chr1	230493068	230561343	Intron1	-	PGBD5	protein_coding	chr1	230528473	230535111	1	0.0972244599047968	*	*	*	*	*	0	0	*	*	*	*	*	0	0	chr1-230534965:230535455	chr1	230534965	230535455	chr1	230534965	230535111	CTCF	chr1	230533935	230534635	chr1	230533935
chr1	231429652	231445926	0.22832425892317	-0.390947982729431	0.888888888888889	0.633974358974359	0.457533896597816	0.882114778919463	171	2.66948678334187e-42	*	*	*	InterGenic	*	*	*	*	*	*	*	*	*	*	*	*	*	0	0	*	*	*	*	*	0	0	chr1-231442545:231442695	chr1	231442545	231442695	chr1	231442545	231442695	ZEB2,MNT	chr1	231442474	231443115	chr1	231442474
chr1	239342698	239346414	0.226399700064272	-0.182672134037537	0.716666666666666	0.483549783549784	0.66592378672295	0.843866553456218	49	5.51356897695912e-10	*	*	*	InterGenic	*	*	*	*	*	*	*	*	*	*	*	*	*	0	0	*	*	*	*	*	0	0	chr1-239345225:239345375	chr1	239345225	239345375	chr1	239345225	239345375	GATA3,YY1,JUND,SP1,RXRA,HNF4A	chr1	239341877	239342829	chr1	239342698
chr1	241501091	241519039	0.200836929951875	-0.186986293648261	0.78604118993135	0.574776785714285	0.646136367070201	0.833030096660049	139	2.86774548731644e-22	chr1	241262063	241518998	Intron2	-	RGS7	protein_coding	chr1	241501091	241518998	0.997715622910631	0.0696946698581353	*	*	*	*	*	0	0	*	*	*	*	*	0	0	chr1-241518825:241518975	chr1	241518825	241518975	chr1	241518825	241518975	FOS,ATF2,CREB1	chr1	241516161	241516906	chr1	241516161
chr1	241501091	241519039	0.200836929951875	-0.186986293648261	0.78604118993135	0.574776785714285	0.646136367070201	0.833030096660049	139	2.86774548731644e-22	chr1	241518999	241519126	Exon2	-	RGS7	protein_coding	chr1	241518999	241519039	0.00222866057499443	0.31496062992126	*	*	*	*	*	0	0	*	*	*	*	*	0	0	*	*	*	*	*	0	0	*	*	*	*	*	0
chr1	249232681	249238470	0.324695459579181	-0.214309608543284	0.776785714285714	0.388850889192886	0.637322482714009	0.84250274419937	55	3.71632926129622e-10	*	*	*	InterGenic	*	*	*	*	*	*	*	*	*	*	*	*	*	0	0	*	*	*	*	*	0	0	*	*	*	*	*	0	0	CTCF,POLR2A	chr1	249238145	249239325	chr1	249238145
chr1	249238511	249238870	0.214551396316102	0.257262099638679	0.402777777777778	0.163333333333333	0.821084607412865	0.609247458078742	21	0.000199293214612119	*	*	*	InterGenic	*	*	*	*	*	*	*	*	*	*	*	*	*	0	0	*	*	*	*	*	0	0	*	*	*	*	*	0	0	CTCF,POLR2A	chr1	249238145	249239325	chr1	249238511
chr1	249238879	249239855	0.296715267303503	-0.303975202332886	0.846153846153846	0.528301886792453	0.54869256214757	0.897946285506063	101	2.07618815076136e-28	*	*	*	InterGenic	*	*	*	*	*	*	*	*	*	*	*	*	*	0	0	*	*	*	*	*	0	0	chr1-249239705:249239930	chr1	249239705	249239930	chr1	249239705	249239855	MCM5,NBN,NR2C1,NR2F1,NR2F2,NR2F6,PCBP2,HMBOX1,ZBTB40,SUZ12,KDM1A,TCF12,DPF2,PRDM10,NUFIP1,NBN,NFRKB,MCM3	chr1	249239513	249240619	chr1	249239513
chr2	10269	11466	0.260869565217391	-0.505922407132849	0.923076923076923	0.692307692307692	0.216674140549451	0.75095956311401	144	3.94730492118086e-39	*	*	*	InterGenic	*	*	*	*	*	*	*	*	*	*	*	*	*	0	0	*	*	*	*	*	0	0	chr2-10265:10515	chr2	10265	10515	chr2	10269	10515	NR2F2,PCBP2,HMBOX1,NBN,MCM2	chr2	10173	10857	chr2	10269
chr2	45980	46370	0.22609819121447	0.230278640997869	0.421052631578947	0.13953488372093	0.662591123829328	0.41066059380038	58	2.69431379075592e-08	chr2	45440	46385	FirstExon	-	FAM110C	protein_coding	chr2	45980	46370	1	0.412698412698413	CpG: 124	chr2	45510	46559	chr2	45980	46370	*	*	*	*	*	0	0	chr2-45920:46355	chr2	45920	46355	chr2	45980	46355	CTCF,POLR2A,REST,TAF1,RAD21,MAX,SP1,JUND,STAT3,HNF4A,RXRA,EZH2,ASH2L,SUZ12,RBBP5,KDM4A,RNF2,CTCF,PHF8,ZFX,SIN3A,TAF15,KDM4A,ELF1,CHD1,HDAC2,POLR2A,ZBTB7A,TAF1,SMARCE1,REST,HNF4G,HNF4A,PHF8,EGR1,CTBP1,MYC,RXRA,RAD21,CTCF,MAX,ETS1,MNT,CREB1,FOXA1,JUND,GATA3,SP1,ATF7,RNF2,ELF1,TAF1,RBM39,ATF2,HNRNPLL,REST,RAD21,HNF4A,RFX1,STAT3	chr2	44572	47640	chr2	45980
chr2	487969	489126	0.214198286413709	-0.410641432260213	0.894736842105263	0.675675675675676	0.437092708153044	0.861161937792668	90	2.53961967051689e-22	*	*	*	InterGenic	*	*	*	*	*	*	*	*	*	*	*	*	*	0	0	*	*	*	*	*	0	0	chr2-488625:488775	chr2	488625	488775	chr2	488625	488775	*	*	*	*	*	0
chr2	1520658	1526844	0.321428571428572	-0.356054068811824	0.846153846153846	0.483870967741935	0.508744969983174	0.834226279711511	90	4.67449034765768e-22	chr2	1520655	1520754	Exon5	+	TPO	protein_coding	chr2	1520658	1520754	0.0155189136760427	0.96969696969697	*	*	*	*	*	0	0	*	*	*	*	*	0	0	chr2-1520605:1520755	chr2	1520605	1520755	chr2	1520658	1520754	EZH2,POLR2A	chr2	1520013	1520965	chr2	1520658
chr2	1520658	1526844	0.321428571428572	-0.356054068811824	0.846153846153846	0.483870967741935	0.508744969983174	0.834226279711511	90	4.67449034765768e-22	chr2	1520755	1546192	Intron5	+	TPO	protein_coding	chr2	1520755	1526844	0.984319430973165	0.239375712544718	*	*	*	*	*	0	0	*	*	*	*	*	0	0	chr2-1521185:1521335	chr2	1521185	1521335	chr2	1521185	1521335	EZH2,POLR2A	chr2	1520013	1520965	chr2	1520755
chr2	1526874	1542591	0.448198198198198	0.240894075465601	0.6	0.105555555555555	0.685756356118512	0.474459336726912	59	1.50184180541419e-16	chr2	1520755	1546192	Intron5	+	TPO	protein_coding	chr2	1526874	1542591	1	0.617879466918269	*	*	*	*	*	0	0	chr2:1530125-1530448	chr2	1530125	1530448	chr2	1530125	1530448	chr2-1526805:1526955	chr2	1526805	1526955	chr2	1526874	1526955	ZKSCAN1	chr2	1527842	1528745	chr2	1527842
chr2	1542617	1554447	0.223514211886305	-0.314749729843205	0.85	0.59375	0.499128401669026	0.853949413196341	262	6.61558071301215e-39	chr2	1520755	1546192	Intron5	+	TPO	protein_coding	chr2	1542617	1546192	0.302197802197802	0.140543303062468	CpG: 19	chr2	1544272	1544489	chr2	1544272	1544489	*	*	*	*	*	0	0	chr2-1542500:1542775	chr2	1542500	1542775	chr2	1542617	1542775	CTCF,ZNF217,ZFX,ZNF444,TRIM22,SMC3,ZNF143,RAD21,SMARCA5,YY1,ZBTB33	chr2	1542194	1543077	chr2	1542617
chr2	1542617	1554447	0.223514211886305	-0.314749729843205	0.85	0.59375	0.499128401669026	0.853949413196341	262	6.61558071301215e-39	chr2	1546193	1546594	LastExon	+	TPO	protein_coding	chr2	1546193	1546594	0.0338968723584108	1	*	*	*	*	*	0	0	*	*	*	*	*	0	0	chr2-1546185:1546335	chr2	1546185	1546335	chr2	1546193	1546335	CTCF,SMARCA4	chr2	1546234	1547058	chr2	1546234
chr2	1542617	1554447	0.223514211886305	-0.314749729843205	0.85	0.59375	0.499128401669026	0.853949413196341	262	6.61558071301215e-39	chr2	1550437	1550707	LastExon	-	AC144450.1	antisense	chr2	1550437	1550707	0.0228233305156382	1	*	*	*	*	*	0	0	*	*	*	*	*	0	0	chr2-1550505:1550670	chr2	1550505	1550670	chr2	1550505	1550670	CTCF,SMC3,RAD21,CC2D1A,XRCC5,TRIM22,RCOR1,MXI1,ZKSCAN1,MNT,MYC,YY1,SMARCA4,MAFK,ZNF143,MAFF,NFE2,REST,ATF3,USF2,USF1,MAX	chr2	1549449	1550444	chr2	1550437
chr2	1542617	1554447	0.223514211886305	-0.314749729843205	0.85	0.59375	0.499128401669026	0.853949413196341	262	6.61558071301215e-39	chr2	1550708	1620938	Intron2	-	AC144450.1	antisense	chr2	1550708	1554447	0.316060862214708	0.0532393564003987	*	*	*	*	*	0	0	*	*	*	*	*	0	0	chr2-1550765:1551050	chr2	1550765	1551050	chr2	1550765	1551050	KDM1A,BCOR,CTCF,RAD21,CEBPB	chr2	1550504	1551402	chr2	1550708
chr2	3307952	3310198	0.253365973072216	-0.2310625083346	0.764705882352941	0.531914893617021	0.612197222702993	0.884711805755877	62	3.73871753283219e-11	chr2	3261227	3341787	Intron3	-	TSSC1	protein_coding	chr2	3307952	3310198	1	0.0278798411122145	*	*	*	*	*	0	0	*	*	*	*	*	0	0	chr2-3309165:3309315	chr2	3309165	3309315	chr2	3309165	3309315	AGO2,AGO1,ZHX2,MXI1,YY1,NCOR1,SKI,GABPA,NR2F6,RAD21,POLR2A,TBL1XR1,NR2F2,CTCF,KAT2B,RXRA,HNF4A,SP1,HNF4G,ARID3A,SMARCA4,FOXA1,ZNF384,IKZF1,RBM39,MEF2B,HNRNPLL,CTCF,TAF1,MXI1,ASH2L,RAD21,SMC3,TCF7L2,L3MBTL2,AGO2,SIN3A,MAX,MNT,ATF7,GATA2,SP1,EP300,U2AF1,YY1,HNF4A,THAP1,TCF12,FOXK2,CBX3,RFX1,HDAC1,SKIL,CLOCK,RAD51,XRCC5,NR2F2,HDAC2,CTBP1,ESRRA,MYC,ARNT,RCOR1,ETV6,E2F1,MITF,TCF7,SKI,RUNX3,ZNF143,NCOR…	chr2	3306147	3308921	chr2	3307952
chr2	9534490	9543901	0.217832165727767	-0.356308700458432	0.875	0.652504472271914	0.456416100500451	0.838915553292216	185	2.26603125083545e-40	chr2	9533777	9540151	Intron24	+	ASAP2	protein_coding	chr2	9534490	9540151	0.601530124322601	0.888139315971133	*	*	*	*	*	0	0	*	*	*	*	*	0	0	chr2-9534565:9534775	chr2	9534565	9534775	chr2	9534565	9534775	EP300,POLR2A,CTCF,MAFK,ZNF316,MAFF	chr2	9538920	9539723	chr2	9538920
chr2	9534490	9543901	0.217832165727767	-0.356308700458432	0.875	0.652504472271914	0.456416100500451	0.838915553292216	185	2.26603125083545e-40	chr2	9540152	9540201	Exon25	+	ASAP2	protein_coding	chr2	9540152	9540201	0.00520667304218468	1	*	*	*	*	*	0	0	*	*	*	*	*	0	0	chr2-9540000:9540895	chr2	9540000	9540895	chr2	9540152	9540201	*	*	*	*	*	0
chr2	9534490	9543901	0.217832165727767	-0.356308700458432	0.875	0.652504472271914	0.456416100500451	0.838915553292216	185	2.26603125083545e-40	chr2	9540202	9540870	Intron25	+	ASAP2	protein_coding	chr2	9540202	9540870	0.070980767187334	1	*	*	*	*	*	0	0	*	*	*	*	*	0	0	chr2-9540000:9540895	chr2	9540000	9540895	chr2	9540202	9540870	RCOR1,ZNF444,CTBP1,MNT,NFXL1,MEIS2,ZNF24,PKNOX1	chr2	9540455	9541042	chr2	9540455
chr2	9534490	9543901	0.217832165727767	-0.356308700458432	0.875	0.652504472271914	0.456416100500451	0.838915553292216	185	2.26603125083545e-40	chr2	9540871	9540959	Exon26	+	ASAP2	protein_coding	chr2	9540871	9540959	0.00935075974922962	1	*	*	*	*	*	0	0	*	*	*	*	*	0	0	chr2-9540000:9540895	chr2	9540000	9540895	chr2	9540871	9540895	RCOR1,ZNF444,CTBP1,MNT,NFXL1,MEIS2,ZNF24,PKNOX1	chr2	9540455	9541042	chr2	9540871
chr2	9534490	9543901	0.217832165727767	-0.356308700458432	0.875	0.652504472271914	0.456416100500451	0.838915553292216	185	2.26603125083545e-40	chr2	9540960	9541402	Intron26	+	ASAP2	protein_coding	chr2	9540960	9541402	0.0469663160131761	1	*	*	*	*	*	0	0	*	*	*	*	*	0	0	*	*	*	*	*	0	0	RCOR1,ZNF444,CTBP1,MNT,NFXL1,MEIS2,ZNF24,PKNOX1	chr2	9540455	9541042	chr2	9540960
chr2	9534490	9543901	0.217832165727767	-0.356308700458432	0.875	0.652504472271914	0.456416100500451	0.838915553292216	185	2.26603125083545e-40	chr2	9541403	9541525	Exon27	+	ASAP2	protein_coding	chr2	9541403	9541525	0.0129635532887047	1	*	*	*	*	*	0	0	*	*	*	*	*	0	0	*	*	*	*	*	0	0	ZBTB33	chr2	9541204	9541660	chr2	9541403
chr2	9534490	9543901	0.217832165727767	-0.356308700458432	0.875	0.652504472271914	0.456416100500451	0.838915553292216	185	2.26603125083545e-40	chr2	9541526	9543381	Intron27	+	ASAP2	protein_coding	chr2	9541526	9543381	0.19710976516842	1	*	*	*	*	*	0	0	*	*	*	*	*	0	0	chr2-9541565:9541715	chr2	9541565	9541715	chr2	9541565	9541715	ZBTB33	chr2	9541204	9541660	chr2	9541526
chr2	9534490	9543901	0.217832165727767	-0.356308700458432	0.875	0.652504472271914	0.456416100500451	0.838915553292216	185	2.26603125083545e-40	chr2	9543382	9545807	LastExon	+	ASAP2	protein_coding	chr2	9543382	9543901	0.055148230793752	0.214020618556701	*	*	*	*	*	0	0	*	*	*	*	*	0	0	chr2-9543745:9543955	chr2	9543745	9543955	chr2	9543745	9543901	*	*	*	*	*	0
chr2	9534490	9543901	0.217832165727767	-0.356308700458432	0.875	0.652504472271914	0.456416100500451	0.838915553292216	185	2.26603125083545e-40	chr2	9543604	9547034	LastExon	-	ITGB1BP1	protein_coding	chr2	9543604	9543901	0.03155881415365	0.0865889212827988	*	*	*	*	*	0	0	*	*	*	*	*	0	0	chr2-9543745:9543955	chr2	9543745	9543955	chr2	9543745	9543901	*	*	*	*	*	0
chr2	9865401	9888033	0.20859538784067	-0.333709817304658	0.833333333333333	0.595238095238095	0.542229616567277	0.886891077805614	262	4.12298010305335e-36	*	*	*	InterGenic	*	*	*	*	*	*	*	*	*	*	*	*	*	0	0	chr2:9878621-9878995	chr2	9878621	9878995	chr2	9878621	9878995	chr2-9865260:9865450	chr2	9865260	9865450	chr2	9865401	9865450	ZBTB33	chr2	9867846	9868302	chr2	9867846
chr2	10149101	10157144	0.261553829078801	-0.515860704741872	0.9375	0.643462469733656	0.301862420566087	0.838652440316392	421	8.80776992581758e-119	*	*	*	InterGenic	*	*	*	*	*	*	*	*	*	*	*	*	*	0	0	chr2:10149985-10150413	chr2	10149985	10150413	chr2	10149985	10150413	chr2-10148640:10149135	chr2	10148640	10149135	chr2	10149101	10149135	RXRA,MAX,ESRRA,MGA,NR2F1,L3MBTL2,CTCF,MYC,REST,THRA,EP300,MITF,RAD51,MEIS2	chr2	10148292	10149321	chr2	10149101
chr2	43451573	43452455	-0.208333333333333	-0.140468665049017	0.407407407407407	0.620689655172414	0.526129941574507	0.710858152714665	126	8.84578502892452e-35	chr2	43449541	43452891	LastExon	-	ZFP36L2	protein_coding	chr2	43451573	43452455	1	0.263283582089552	CpG: 341	chr2	43451445	43454951	chr2	43451573	43452455	*	*	*	*	*	0	0	chr2-43451245:43451595	chr2	43451245	43451595	chr2	43451573	43451595	KDM1A,ZMYM3,POLR2A,RBM25,SAP30,ASH2L,TRIM28,CTCF,MAX,MYC,RBM39,SIN3A,USF1,SPI1,JUND,KDM4A,CHD7,ETS1,NR3C1,NANOG,TAF7,HDAC2,RAD21,LEF1,TCF12,GABPA,EGR1,EP300,SP1,RXRA,NR2F2,GATA1,SMAD1,TBL1XR1,TBP,ZBED1,XRCC5,RAD21,SIN3A,MEF2C,IKZF1,ZNF24,TFAP4,HNF1A,POLR2G,ETS1,MEF2A,EP300,GABPA,ETV4,ZNF687,TAF1,GATAD2B,RBFOX2,ELF1,YY1,ZBTB7A,NR2C1,ZNF592,HNRNPL,HDAC2,IKZF2,NANOG,EBF1,CBFB,ZNF217,BHLHE40,MYC,ETV6…	chr2	43444355	43459309	chr2	43451573
chr2	47595867	47596706	0.267237982663515	0.167431241139973	0.5	0.219090909090909	0.656677158003228	0.472795445308956	79	4.80215195573894e-22	chr2	47572363	47596066	Intron1	+	EPCAM	protein_coding	chr2	47595867	47596066	0.237187127532777	0.00839556174323925	*	*	*	*	*	0	0	*	*	*	*	*	0	0	chr2-47595965:47596215	chr2	47595965	47596215	chr2	47595965	47596066	KDM1A,ASH2L,HSF1,GATA3,RFX1,ARID1B,RNF2,POLR2A,PRPF4,ZNF217,ATF7,YY1,PHF8,ZNF444,RBFOX2,ZEB2,CBFA2T3,SIN3A,HDAC2,RCOR1,MNT,CTCF,CBFA2T2,REST,POLR2G,EP300,EGR1,CREB1,FOS,GATAD2B,SP1,FOSL2,ATF3,TCF12,JUND,SOX6,RBBP5,L3MBTL2,SMARCE1,RXRA,MAFK,ELF1,AGO2,NFE2,FOSL1,KDM4A,JUN,RAD21,MXI1,ZNF592,TAF1,ZEB1,MTA1,CTBP1,MYC,TBP,TAF7,ZFX,CREB3L1,EZH2,TAF15,MAX,ZBTB7A,HDAC6,E2F6,PCBP1,FIP1L1,YY1,HDAC1,SIN3B,AG…	chr2	47595855	47597504	chr2	47595867
chr2	47595867	47596706	0.267237982663515	0.167431241139973	0.5	0.219090909090909	0.656677158003228	0.472795445308956	79	4.80215195573894e-22	chr2	47596067	47596374	Exon2	+	EPCAM	protein_coding	chr2	47596067	47596374	0.365911799761621	1	*	*	*	*	*	0	0	*	*	*	*	*	0	0	chr2-47595965:47596215	chr2	47595965	47596215	chr2	47596067	47596215	KDM1A,ASH2L,HSF1,GATA3,RFX1,ARID1B,RNF2,POLR2A,PRPF4,ZNF217,ATF7,YY1,PHF8,ZNF444,RBFOX2,ZEB2,CBFA2T3,SIN3A,HDAC2,RCOR1,MNT,CTCF,CBFA2T2,REST,POLR2G,EP300,EGR1,CREB1,FOS,GATAD2B,SP1,FOSL2,ATF3,TCF12,JUND,SOX6,RBBP5,L3MBTL2,SMARCE1,RXRA,MAFK,ELF1,AGO2,NFE2,FOSL1,KDM4A,JUN,RAD21,MXI1,ZNF592,TAF1,ZEB1,MTA1,CTBP1,MYC,TBP,TAF7,ZFX,CREB3L1,EZH2,TAF15,MAX,ZBTB7A,HDAC6,E2F6,PCBP1,FIP1L1,YY1,HDAC1,SIN3B,AG…	chr2	47595855	47597504	chr2	47596067
chr2	47595867	47596706	0.267237982663515	0.167431241139973	0.5	0.219090909090909	0.656677158003228	0.472795445308956	79	4.80215195573894e-22	chr2	47596375	47600601	Intron2	+	EPCAM	protein_coding	chr2	47596375	47596706	0.394517282479142	0.0783246568859442	CpG: 70	chr2	47596629	47597256	chr2	47596629	47596706	*	*	*	*	*	0	0	chr2-47596225:47597350	chr2	47596225	47597350	chr2	47596375	47596706	KDM1A,ASH2L,HSF1,GATA3,RFX1,ARID1B,RNF2,POLR2A,PRPF4,ZNF217,ATF7,YY1,PHF8,ZNF444,RBFOX2,ZEB2,CBFA2T3,SIN3A,HDAC2,RCOR1,MNT,CTCF,CBFA2T2,REST,POLR2G,EP300,EGR1,CREB1,FOS,GATAD2B,SP1,FOSL2,ATF3,TCF12,JUND,SOX6,RBBP5,L3MBTL2,SMARCE1,RXRA,MAFK,ELF1,AGO2,NFE2,FOSL1,KDM4A,JUN,RAD21,MXI1,ZNF592,TAF1,ZEB1,MTA1,CTBP1,MYC,TBP,TAF7,ZFX,CREB3L1,EZH2,TAF15,MAX,ZBTB7A,HDAC6,E2F6,PCBP1,FIP1L1,YY1,HDAC1,SIN3B,AG…	chr2	47595855	47597504	chr2	47596375
chr2	55166092	55176956	0.25098814229249	-0.290191354254644	0.854497354497354	0.577352472089315	0.578249294407043	0.8623225250571	143	7.01781070067119e-31	chr2	55155889	55176018	Intron27	+	EML6	protein_coding	chr2	55166092	55176018	0.913659793814433	0.493119379999006	*	*	*	*	*	0	0	*	*	*	*	*	0	0	chr2-55166200:55166495	chr2	55166200	55166495	chr2	55166200	55166495	TRIM28,CBX3,ZFX,GATA3,JUND,FOXA1	chr2	55164920	55166457	chr2	55166092
chr2	55166092	55176956	0.25098814229249	-0.290191354254644	0.854497354497354	0.577352472089315	0.578249294407043	0.8623225250571	143	7.01781070067119e-31	chr2	55176019	55176097	Exon28	+	EML6	protein_coding	chr2	55176019	55176097	0.00717967599410898	1	*	*	*	*	*	0	0	*	*	*	*	*	0	0	chr2-55176065:55176435	chr2	55176065	55176435	chr2	55176065	55176097	*	*	*	*	*	0
chr2	55166092	55176956	0.25098814229249	-0.290191354254644	0.854497354497354	0.577352472089315	0.578249294407043	0.8623225250571	143	7.01781070067119e-31	chr2	55176098	55177786	Intron28	+	EML6	protein_coding	chr2	55176098	55176956	0.0789764359351988	0.508293838862559	*	*	*	*	*	0	0	*	*	*	*	*	0	0	chr2-55176065:55176435	chr2	55176065	55176435	chr2	55176098	55176435	*	*	*	*	*	0
chr2	88650124	88650757	0.25	0.146028278434361	0.428571428571429	0.14	0.482938545241728	0.330417133069479	42	7.99001708145339e-08	*	*	*	InterGenic	*	*	*	*	*	*	*	*	CpG: 36	chr2	88650247	88650686	chr2	88650247	88650686	*	*	*	*	*	0	0	chr2-88650125:88650775	chr2	88650125	88650775	chr2	88650125	88650757	ATF3,JUND,MITF,FOS,CTCF,BHLHE40,PKNOX1,RAD21,MAX,E2F6,HDAC2,SP1,SIN3A,PCBP1,REST,TCF12,PHF8,CTCF,TAF15,POLR2A,ZFX,STAT3,ASH2L,L3MBTL2,NRF1,HDAC2,HNRNPLL,ZEB2,ZNF217,TAF1,ELF1,ZBTB33,RBM39,IKZF1,TBP,CHD1,TAF7,MNT,E2F6,ZNF444,TRIM22,IKZF2,MYC,RAD21,JUND,REST,ZEB1,YY1,ZNF143,GABPA,SMARCA5,CBX3,GATAD2B,MAX,EP300,KDM1A,EGR1,BACH1,SMC3,CREM,CBX5,XRCC5	chr2	88648858	88651198	chr2	88650124
chr2	89830457	89851971	0.208333333333333	0.482223222062057	0.25	0.0285714285714286	0.715488599501357	0.188694497374029	692	1.56374206898299e-174	*	*	*	InterGenic	*	*	*	*	*	*	*	*	*	*	*	*	*	0	0	chr2:89848673-89848677	chr2	89848673	89848677	chr2	89848673	89848677	chr2-89839740:89839890	chr2	89839740	89839890	chr2	89839740	89839890	*	*	*	*	*	0
chr2	89851992	89879143	0.379310344827586	0.643239116302212	0.409090909090909	0.0178571428571429	0.781950663112753	0.105967071805029	390	9.53931151914541e-127	*	*	*	InterGenic	*	*	*	*	*	*	*	*	*	*	*	*	*	0	0	chr2:89871741-89871869	chr2	89871741	89871869	chr2	89871741	89871869	chr2-89867285:89867435	chr2	89867285	89867435	chr2	89867285	89867435	*	*	*	*	*	0
chr2	90527749	90530576	0.234848484848485	-0.287575079394516	0.9	0.666666666666667	0.385593216482346	0.686271296777067	64	8.35523381027538e-11	*	*	*	InterGenic	*	*	*	*	*	*	*	*	*	*	*	*	*	0	0	*	*	*	*	*	0	0	*	*	*	*	*	0	0	*	*	*	*	*	0
chr2	105472748	105475605	0.347286821705426	0.132400376779729	0.533333333333333	0.181818181818182	0.538110278386422	0.384148296376525	168	8.59636007841917e-56	chr2	105470291	105542412	Intron2	+	RP11-13J10.1	sense_overlapping	chr2	105472748	105475605	1	0.0396139820579304	CpG: 334	chr2	105468851	105473488	chr2	105472748	105473488	*	*	*	*	*	0	0	chr2-105472565:105472815	chr2	105472565	105472815	chr2	105472748	105472815	EZH2,SUZ12,MXI1,RNF2,POLR2A,HDAC2,KDM4A,EGR1,RBBP5,SPI1,CBX8,EGR1,TCF12,EP300,CBX2,BMI1,CBX8,CBX8,PKNOX1,MXI1,TCF12,RNF2,ZNF384,CBX8,MXI1,SUZ12,TCF12,CTCF,RNF2,USF1,REST,HDAC2,JUND,RBBP5,SIN3A,RNF2,KDM1A,ASH2L,KDM4A,SMARCA4,MXI1,TCF12,RFX1,SP1,RNF2,TCF12,SP1,HDAC2,CTCF,MXI1,RAD21,RNF2,RNF2,CTCF,KDM4A,RNF2,CBX8,RNF2	chr2	105472421	105485596	chr2	105472748
chr2	105472748	105475605	0.347286821705426	0.132400376779729	0.533333333333333	0.181818181818182	0.538110278386422	0.384148296376525	168	8.59636007841917e-56	chr2	105471969	105476929	FirstExon	+	POU3F3	protein_coding	chr2	105472748	105475605	1	0.576008064516129	CpG: 334	chr2	105468851	105473488	chr2	105472748	105473488	*	*	*	*	*	0	0	chr2-105472565:105472815	chr2	105472565	105472815	chr2	105472748	105472815	EZH2,SUZ12,MXI1,RNF2,POLR2A,HDAC2,KDM4A,EGR1,RBBP5,SPI1,CBX8,EGR1,TCF12,EP300,CBX2,BMI1,CBX8,CBX8,PKNOX1,MXI1,TCF12,RNF2,ZNF384,CBX8,MXI1,SUZ12,TCF12,CTCF,RNF2,USF1,REST,HDAC2,JUND,RBBP5,SIN3A,RNF2,KDM1A,ASH2L,KDM4A,SMARCA4,MXI1,TCF12,RFX1,SP1,RNF2,TCF12,SP1,HDAC2,CTCF,MXI1,RAD21,RNF2,RNF2,CTCF,KDM4A,RNF2,CBX8,RNF2	chr2	105472421	105485596	chr2	105472748
chr2	127016301	127033787	0.203390313390313	0.030705172068116	0.5	0.259259259259259	0.654661967281923	0.60557977898593	103	2.44984450225182e-17	*	*	*	InterGenic	*	*	*	*	*	*	*	*	*	*	*	*	*	0	0	*	*	*	*	*	0	0	chr2-127032780:127033010	chr2	127032780	127033010	chr2	127032780	127033010	MYC,MNT,MGA,MAX,HNRNPK,PCBP2	chr2	127033315	127034325	chr2	127033315
chr2	133021407	133031758	0.206011351909185	-0.0936539071327725	0.666666666666667	0.447368421052632	0.743292594668101	0.855229218769012	249	1.52619689915852e-20	*	*	*	InterGenic	*	*	*	*	*	*	*	*	*	*	*	*	*	0	0	chr2:133029863-133030277	chr2	133029863	133030277	chr2	133029863	133030277	chr2-133031540:133031875	chr2	133031540	133031875	chr2	133031540	133031758	CBX3,CTCF,SIN3A,PCBP2,ELK1,JUND,EP300,USF2,IRF1,TBL1XR1,MAFK,SETDB1,MAX,SMAD1,REST,RFX5,AGO1,CBX3,HNRNPLL,POLR2A,CTBP1,KDM4B,CBX1,ESRRA,XRCC5,MYB,RNF2,PTBP1,PHF8,MYC,FIP1L1,SMARCE1,FOXK2,ZNF24,MXI1,YY1,JUN,SUZ12,EP300,NFXL1,CEBPB,ZKSCAN1,NFE2L2,NEUROD1,ETV6,RCOR1,ZBTB33,BHLHE40,ZNF143,PRPF4,SMARCA5,EZH2,KDM5A,ATF2,FOXA1,SREBF2,NCOR1,CBX8,NR3C1,RBBP5,ASH2L,HDAC2,HNF1A,CBX5,SMARCE1,SOX6,HDAC2,ATM,E…	chr2	133022215	133031836	chr2	133022215
chr2	135361483	135368060	0.25	-0.276290592829302	0.773504273504274	0.5	0.605063568795081	0.866980495794407	127	4.37142775432485e-28	chr2	135309663	135470769	Intron2	-	TMEM163	protein_coding	chr2	135361483	135368060	1	0.040824053728601	*	*	*	*	*	0	0	*	*	*	*	*	0	0	chr2-135361640:135361830	chr2	135361640	135361830	chr2	135361640	135361830	EBF1	chr2	135367874	135368396	chr2	135367874
chr2	162270888	162271524	0.235416666666666	0.02076457293971	0.5625	0.304347826086957	0.592582387636982	0.564499427748214	63	6.80250066426695e-17	*	*	*	InterGenic	*	*	*	*	*	*	*	*	CpG: 58	chr2	162270888	162271413	chr2	162270888	162271413	*	*	*	*	*	0	0	chr2-162270600:162272410	chr2	162270600	162272410	chr2	162270888	162271524	RBM22,POLR2G,BCL3,ETS1,NR2F1,NR2F6,POLR2A,KDM1A,EZH2,SIN3A,CTCF,ASH2L,AGO1,RBBP5,SUZ12,HDAC2,FIP1L1,ZFX,TAF1,HNRNPL,CHD1,GABPA,ZBTB33,YY1,POLR2G,RBM39,RBFOX2,TRIM28,TAF15,EGR1,U2AF1,AGO2,RBM22,KDM5B,SMARCA4,HNRNPLL,ZNF579,TBP,SMARCE1,JUND,POLR2A,NRF1,CTBP1,ZNF217,RNF2,ZBTB7B,PTBP1,L3MBTL2,CREB3L1,MGA,FUS,RB1,SMARCA4,TRIM24,ZNF687,TCF7L2,ZNF316,EED,HNRNPLL,E2F6,MAX,UBTF,SPI1,RNF2,GATA3,EGR1,FOXA2,…	chr2	162269781	162285768	chr2	162270888
chr2	164204246	164205342	0.294957983193278	-0.0749275445526436	0.69375	0.396969696969697	0.569699995047071	0.63633386023423	49	8.3205745347448e-17	*	*	*	InterGenic	*	*	*	*	*	*	*	*	CpG: 28	chr2	164204740	164205039	chr2	164204740	164205039	chr2:164204698-164204962	chr2	164204698	164204962	chr2	164204698	164204962	chr2-164205080:164205830	chr2	164205080	164205830	chr2	164205080	164205342	FOXA1,PKNOX1,TRIM28,ZFX,TAF7,POLR2A,YY1,SIN3A,TAF1,ZNF687,ETS1,FOXA1,REST,GATA3,BCL3,EP300,SREBF1,L3MBTL2,PKNOX1,ATF3,FOSL2,MBD2,ASH2L,DPF2,CTBP1,JUND,CREB1,NR3C1,MYC,ZNF507,RFX5,FOS,ZNF444,BHLHE40,SP1,RAD21,SMARCE1,ZBTB33,HDAC2,ZNF24,ZNF217,GATA2,TCF12,MAFK,CEBPB,NR2F2,RBBP5,BACH1,TBP,PHF8,MAFF,USF2,USF1,EZH2,MLLT1,NFE2L2,MNT,RAD51,SMARCA4,CHD1,CTCF,RNF2,CLOCK,L3MBTL2,CHD7,ZNF143,SIX5,SIN3A,ELF1…	chr2	164204148	164206149	chr2	164204246
chr2	171831176	171839856	0.224747474747475	-0.385463516863914	0.909090909090909	0.693376068376068	0.353759374819711	0.759578414100053	111	1.04283307627611e-19	*	*	*	InterGenic	*	*	*	*	*	*	*	*	*	*	*	*	*	0	0	*	*	*	*	*	0	0	chr2-171839760:171840275	chr2	171839760	171840275	chr2	171839760	171839856	AGO2	chr2	171839733	171840397	chr2	171839733
chr2	176993506	176993988	0.222147950089127	0.0662495880259685	0.477272727272728	0.256578947368421	0.557203003955371	0.493354592717924	31	6.20234565996944e-09	chr2	176987173	177000046	Intron2	-	HOXD-AS2	antisense	chr2	176993506	176993988	1	0.0374427095471141	CpG: 186	chr2	176993479	176995557	chr2	176993506	176993988	*	*	*	*	*	0	0	chr2-176992820:176995870	chr2	176992820	176995870	chr2	176993506	176993988	EZH2,SUZ12,CBX8,RNF2,REST,CTCF,CBX8,HNRNPK,KDM4A,CTCF,POLR2A,MXI1,RAD51,ATF3,USF2,USF1,TAF1,YY1,CHD1,EP300,TBP,CTCF,CBX8,HDAC1,SIN3A,PKNOX1,CTBP1,CBX8,EGR1,ZNF316,MAFK,CTCF,RNF2,POLR2A,SPI1,E4F1,CTCF,ATF3,SIN3A,RAD21,SMC3,EP300,ZNF444,TRIM22,CC2D1A,REST,ARID3A,KLF16,RNF2,ZNF143,ARID2,SUZ12,CBX8,SUZ12,RNF2,SP1,KDM4A,TAF7,EGR1,TCF12,CBX8,PKNOX1,L3MBTL2,MXI1,GATA2,CTCF,JUND,POLR2A,L3MBTL2,PCBP1,ZFP9…	chr2	176984378	177006437	chr2	176993506
chr2	176993506	176993988	0.222147950089127	0.0662495880259685	0.477272727272728	0.256578947368421	0.557203003955371	0.493354592717924	31	6.20234565996944e-09	chr2	176993467	176994467	Promoter	+	HOXD8	protein_coding	chr2	176993506	176993988	1	0.482	CpG: 186	chr2	176993479	176995557	chr2	176993506	176993988	*	*	*	*	*	0	0	chr2-176992820:176995870	chr2	176992820	176995870	chr2	176993506	176993988	EZH2,SUZ12,CBX8,RNF2,REST,CTCF,CBX8,HNRNPK,KDM4A,CTCF,POLR2A,MXI1,RAD51,ATF3,USF2,USF1,TAF1,YY1,CHD1,EP300,TBP,CTCF,CBX8,HDAC1,SIN3A,PKNOX1,CTBP1,CBX8,EGR1,ZNF316,MAFK,CTCF,RNF2,POLR2A,SPI1,E4F1,CTCF,ATF3,SIN3A,RAD21,SMC3,EP300,ZNF444,TRIM22,CC2D1A,REST,ARID3A,KLF16,RNF2,ZNF143,ARID2,SUZ12,CBX8,SUZ12,RNF2,SP1,KDM4A,TAF7,EGR1,TCF12,CBX8,PKNOX1,L3MBTL2,MXI1,GATA2,CTCF,JUND,POLR2A,L3MBTL2,PCBP1,ZFP9…	chr2	176984378	177006437	chr2	176993506
chr2	176996876	176999104	0.213235294117647	-0.025901605220404	0.75	0.5	0.539063190864238	0.561938569717677	46	9.75933420873356e-07	chr2	176987173	177000046	Intron2	-	HOXD-AS2	antisense	chr2	176996876	176999104	1	0.173075429192884	*	*	*	*	*	0	0	*	*	*	*	*	0	0	chr2-176998820:176999110	chr2	176998820	176999110	chr2	176998820	176999104	EZH2,SUZ12,CBX8,RNF2,REST,CTCF,CBX8,HNRNPK,KDM4A,CTCF,POLR2A,MXI1,RAD51,ATF3,USF2,USF1,TAF1,YY1,CHD1,EP300,TBP,CTCF,CBX8,HDAC1,SIN3A,PKNOX1,CTBP1,CBX8,EGR1,ZNF316,MAFK,CTCF,RNF2,POLR2A,SPI1,E4F1,CTCF,ATF3,SIN3A,RAD21,SMC3,EP300,ZNF444,TRIM22,CC2D1A,REST,ARID3A,KLF16,RNF2,ZNF143,ARID2,SUZ12,CBX8,SUZ12,RNF2,SP1,KDM4A,TAF7,EGR1,TCF12,CBX8,PKNOX1,L3MBTL2,MXI1,GATA2,CTCF,JUND,POLR2A,L3MBTL2,PCBP1,ZFP9…	chr2	176984378	177006437	chr2	176996876
chr2	176996876	176999104	0.213235294117647	-0.025901605220404	0.75	0.5	0.539063190864238	0.561938569717677	46	9.75933420873356e-07	chr2	176996045	176997423	LastExon	+	HOXD8	protein_coding	chr2	176996876	176997423	0.245511669658887	0.396952104499274	*	*	*	*	*	0	0	*	*	*	*	*	0	0	chr2-176996960:176997855	chr2	176996960	176997855	chr2	176996960	176997423	EZH2,SUZ12,CBX8,RNF2,REST,CTCF,CBX8,HNRNPK,KDM4A,CTCF,POLR2A,MXI1,RAD51,ATF3,USF2,USF1,TAF1,YY1,CHD1,EP300,TBP,CTCF,CBX8,HDAC1,SIN3A,PKNOX1,CTBP1,CBX8,EGR1,ZNF316,MAFK,CTCF,RNF2,POLR2A,SPI1,E4F1,CTCF,ATF3,SIN3A,RAD21,SMC3,EP300,ZNF444,TRIM22,CC2D1A,REST,ARID3A,KLF16,RNF2,ZNF143,ARID2,SUZ12,CBX8,SUZ12,RNF2,SP1,KDM4A,TAF7,EGR1,TCF12,CBX8,PKNOX1,L3MBTL2,MXI1,GATA2,CTCF,JUND,POLR2A,L3MBTL2,PCBP1,ZFP9…	chr2	176984378	177006437	chr2	176996876
chr2	188898416	188905291	0.217287449392712	-0.31569590733345	0.863636363636364	0.633971291866029	0.476829390650694	0.820008808199173	99	8.01237348707044e-24	*	*	*	InterGenic	*	*	*	*	*	*	*	*	*	*	*	*	*	0	0	chr2:188899561-188899722	chr2	188899561	188899722	chr2	188899561	188899722	chr2-188905280:188905430	chr2	188905280	188905430	chr2	188905280	188905291	RBBP5,TAF1,NANOG,EP300,TCF12,TBP,ASH2L,POLR2A,USF1	chr2	188897856	188899144	chr2	188898416
chr2	191044979	191045961	0.239047619047619	0.0558599143402165	0.615384615384615	0.35	0.594138542895384	0.51618667837136	89	6.18764716941422e-25	*	*	*	InterGenic	*	*	*	*	*	*	*	*	CpG: 73	chr2	191044979	191045829	chr2	191044979	191045829	*	*	*	*	*	0	0	chr2-191044445:191046355	chr2	191044445	191046355	chr2	191044979	191045961	MTA2,TBX21,ZBTB40,IKZF2,ARNT,BATF,RAD51,ZNF687,EBF1,PAX5,EP300,USF1,NBN,CTCF,MLLT1,TRIM28,MGA,POLR2A,NRF1,RNF2,L3MBTL2,TAF9B,YY1,POLR2G,ZNF24,AGO1,MNT,CHAMP1,SAP30,EZH2,RAD21,RBFOX2,ZNF316,ZNF592,ZFX,EP300,RXRA,SMARCA4,ZNF143,ARID1B,TBP,NFIC,BHLHE40,TRIM22,MYC,GATAD2B,BRD9,TCF12,EP400,FUS,UBTF,CBX1,BRD4,KDM1A,NR2C1,ZBTB2,SP1,FOXK2,IRF2,JUND,MAX,CREB3L1,TFAP4,HNRNPLL,XRCC5,MYNN,SMC3,MTA1,HDAC2,RB1…	chr2	191044274	191048772	chr2	191044979
chr2	198442344	198453337	0.203309692671395	-0.356534674759563	0.875	0.647058823529412	0.506548175027929	0.871641488288535	114	6.48087341089491e-21	chr2	198437005	198460714	Intron8	-	RFTN2	protein_coding	chr2	198442344	198453337	1	0.463663587667131	*	*	*	*	*	0	0	*	*	*	*	*	0	0	chr2-198453285:198453615	chr2	198453285	198453615	chr2	198453285	198453337	NANOG	chr2	198451994	198452304	chr2	198451994
chr2	201725799	201726645	0.233333333333333	0.228525727233594	0.357142857142857	0.0689655172413793	0.723650198151556	0.440998655686453	12	0.0124863391335916	chr2	201724939	201725960	Intron3	-	CLK1	protein_coding	chr2	201725799	201725960	0.190307328605201	0.157688540646425	*	*	*	*	*	0	0	*	*	*	*	*	0	0	*	*	*	*	*	0	0	FOXA2,FOXA1,E2F8,RBFOX2,SREBF1,POLR2A,POLR2G,USF1,REST,EP300,RBM22,CTCF,TAF1,ATF2,ATF4,ATF7,CEBPB,RBFOX2,PAX8,SKIL,SIN3A,POLR2A,BATF,CTCF,CHD1,YY1,IKZF1,POLR2A,USF1,ARNT,MXI1,EP400,DPF2,MNT,RELB,SIN3A,FOXK2,NFATC1,HDAC1,MLLT1,ATF3,EP300,SMAD5,NBN,RAD51,CLOCK,CREM,HMBOX1,ARID1B,ATF7,TBX21,C11orf30,BACH1,CHD1,USF2,PKNOX1,MAX,KDM5A,GATA3,TBP,BHLHE40,CREB1,ELF1,USF1,TRIM22,E2F1,NFATC3,NFE2L2,BRD4,TAF…	chr2	201723513	201730652	chr2	201725799
chr2	201725799	201726645	0.233333333333333	0.228525727233594	0.357142857142857	0.0689655172413793	0.723650198151556	0.440998655686453	12	0.0124863391335916	chr2	201725961	201726189	Exon3	-	CLK1	protein_coding	chr2	201725961	201726189	0.269503546099291	1	*	*	*	*	*	0	0	*	*	*	*	*	0	0	chr2-201725960:201726290	chr2	201725960	201726290	chr2	201725961	201726189	FOXA2,FOXA1,E2F8,RBFOX2,SREBF1,POLR2A,POLR2G,USF1,REST,EP300,RBM22,CTCF,TAF1,ATF2,ATF4,ATF7,CEBPB,RBFOX2,PAX8,SKIL,SIN3A,POLR2A,BATF,CTCF,CHD1,YY1,IKZF1,POLR2A,USF1,ARNT,MXI1,EP400,DPF2,MNT,RELB,SIN3A,FOXK2,NFATC1,HDAC1,MLLT1,ATF3,EP300,SMAD5,NBN,RAD51,CLOCK,CREM,HMBOX1,ARID1B,ATF7,TBX21,C11orf30,BACH1,CHD1,USF2,PKNOX1,MAX,KDM5A,GATA3,TBP,BHLHE40,CREB1,ELF1,USF1,TRIM22,E2F1,NFATC3,NFE2L2,BRD4,TAF…	chr2	201723513	201730652	chr2	201725961
chr2	201725799	201726645	0.233333333333333	0.228525727233594	0.357142857142857	0.0689655172413793	0.723650198151556	0.440998655686453	12	0.0124863391335916	chr2	201726190	201726424	Intron2	-	CLK1	protein_coding	chr2	201726190	201726424	0.276595744680851	1	*	*	*	*	*	0	0	*	*	*	*	*	0	0	chr2-201726400:201726750	chr2	201726400	201726750	chr2	201726400	201726424	FOXA2,FOXA1,E2F8,RBFOX2,SREBF1,POLR2A,POLR2G,USF1,REST,EP300,RBM22,CTCF,TAF1,ATF2,ATF4,ATF7,CEBPB,RBFOX2,PAX8,SKIL,SIN3A,POLR2A,BATF,CTCF,CHD1,YY1,IKZF1,POLR2A,USF1,ARNT,MXI1,EP400,DPF2,MNT,RELB,SIN3A,FOXK2,NFATC1,HDAC1,MLLT1,ATF3,EP300,SMAD5,NBN,RAD51,CLOCK,CREM,HMBOX1,ARID1B,ATF7,TBX21,C11orf30,BACH1,CHD1,USF2,PKNOX1,MAX,KDM5A,GATA3,TBP,BHLHE40,CREB1,ELF1,USF1,TRIM22,E2F1,NFATC3,NFE2L2,BRD4,TAF…	chr2	201723513	201730652	chr2	201726190
chr2	201725799	201726645	0.233333333333333	0.228525727233594	0.357142857142857	0.0689655172413793	0.723650198151556	0.440998655686453	12	0.0124863391335916	chr2	201726425	201726585	Exon2	-	CLK1	protein_coding	chr2	201726425	201726585	0.189125295508274	1	*	*	*	*	*	0	0	*	*	*	*	*	0	0	chr2-201726400:201726750	chr2	201726400	201726750	chr2	201726425	201726585	FOXA2,FOXA1,E2F8,RBFOX2,SREBF1,POLR2A,POLR2G,USF1,REST,EP300,RBM22,CTCF,TAF1,ATF2,ATF4,ATF7,CEBPB,RBFOX2,PAX8,SKIL,SIN3A,POLR2A,BATF,CTCF,CHD1,YY1,IKZF1,POLR2A,USF1,ARNT,MXI1,EP400,DPF2,MNT,RELB,SIN3A,FOXK2,NFATC1,HDAC1,MLLT1,ATF3,EP300,SMAD5,NBN,RAD51,CLOCK,CREM,HMBOX1,ARID1B,ATF7,TBX21,C11orf30,BACH1,CHD1,USF2,PKNOX1,MAX,KDM5A,GATA3,TBP,BHLHE40,CREB1,ELF1,USF1,TRIM22,E2F1,NFATC3,NFE2L2,BRD4,TAF…	chr2	201723513	201730652	chr2	201726425
chr2	201725799	201726645	0.233333333333333	0.228525727233594	0.357142857142857	0.0689655172413793	0.723650198151556	0.440998655686453	12	0.0124863391335916	chr2	201726586	201729286	Intron1	-	CLK1	protein_coding	chr2	201726586	201726645	0.0697399527186761	0.0218518518518519	*	*	*	*	*	0	0	*	*	*	*	*	0	0	chr2-201726400:201726750	chr2	201726400	201726750	chr2	201726586	201726645	FOXA2,FOXA1,E2F8,RBFOX2,SREBF1,POLR2A,POLR2G,USF1,REST,EP300,RBM22,CTCF,TAF1,ATF2,ATF4,ATF7,CEBPB,RBFOX2,PAX8,SKIL,SIN3A,POLR2A,BATF,CTCF,CHD1,YY1,IKZF1,POLR2A,USF1,ARNT,MXI1,EP400,DPF2,MNT,RELB,SIN3A,FOXK2,NFATC1,HDAC1,MLLT1,ATF3,EP300,SMAD5,NBN,RAD51,CLOCK,CREM,HMBOX1,ARID1B,ATF7,TBX21,C11orf30,BACH1,CHD1,USF2,PKNOX1,MAX,KDM5A,GATA3,TBP,BHLHE40,CREB1,ELF1,USF1,TRIM22,E2F1,NFATC3,NFE2L2,BRD4,TAF…	chr2	201723513	201730652	chr2	201726586
chr2	220082806	220083963	0.230263157894737	0.00326469039082999	0.625	0.368421052631579	0.640395165529518	0.642203654804657	88	4.1741671057907e-25	chr2	220082530	220082846	Intron1	-	ABCB6	protein_coding	chr2	220082806	220082846	0.0345721694036301	0.126582278481013	*	*	*	*	*	0	0	*	*	*	*	*	0	0	chr2-220082585:220083615	chr2	220082585	220083615	chr2	220082806	220082846	NR2F6,EP400,SP1,KDM1A,FOXA2,RXRA,ZBTB7A,FOXA1,HNF4A,ARNT,HDAC1,CREM,SIN3A,TBX21,ASH2L,TRIM28,ATF7,ARID1B,MNT,HNF4G,DPF2,CBFB,POLR2A,ATF3,FOXK2,CTCF,SMARCC2,C11orf30,JUN,REST,NFIC,ZNF316,PML,CC2D1A,NCOA1,SAP30,TRIM24,LEF1,TAF1,CBFA2T3,JUND,ESR1,MAFK,TFAP4,ETS1,GATA1,MYC,SMARCA4,NR2F2,HDAC3,ZKSCAN1,FOXM1,MXI1,IRF1,ZNF384,SMAD5,TCF12,KDM5A,RUNX1,CREB1,ZNF444,TBL1XR1,NCOR1,EP300,HDAC2,SMARCE1,BACH1,C…	chr2	220082229	220084978	chr2	220082806
chr2	220082806	220083963	0.230263157894737	0.00326469039082999	0.625	0.368421052631579	0.640395165529518	0.642203654804657	88	4.1741671057907e-25	chr2	220082847	220083712	FirstExon	-	ABCB6	protein_coding	chr2	220082847	220083712	0.7476231633535	1	CpG: 90	chr2	220082991	220084012	chr2	220082991	220083712	*	*	*	*	*	0	0	chr2-220083620:220084495	chr2	220083620	220084495	chr2	220083620	220083712	NR2F6,EP400,SP1,KDM1A,FOXA2,RXRA,ZBTB7A,FOXA1,HNF4A,ARNT,HDAC1,CREM,SIN3A,TBX21,ASH2L,TRIM28,ATF7,ARID1B,MNT,HNF4G,DPF2,CBFB,POLR2A,ATF3,FOXK2,CTCF,SMARCC2,C11orf30,JUN,REST,NFIC,ZNF316,PML,CC2D1A,NCOA1,SAP30,TRIM24,LEF1,TAF1,CBFA2T3,JUND,ESR1,MAFK,TFAP4,ETS1,GATA1,MYC,SMARCA4,NR2F2,HDAC3,ZKSCAN1,FOXM1,MXI1,IRF1,ZNF384,SMAD5,TCF12,KDM5A,RUNX1,CREB1,ZNF444,TBL1XR1,NCOR1,EP300,HDAC2,SMARCE1,BACH1,C…	chr2	220082229	220084978	chr2	220082847
chr2	220082806	220083963	0.230263157894737	0.00326469039082999	0.625	0.368421052631579	0.640395165529518	0.642203654804657	88	4.1741671057907e-25	chr2	220083713	220084713	Promoter	-	ABCB6	protein_coding	chr2	220083713	220083963	0.216076058772688	0.25	CpG: 90	chr2	220082991	220084012	chr2	220083713	220083963	*	*	*	*	*	0	0	chr2-220083620:220084495	chr2	220083620	220084495	chr2	220083713	220083963	NR2F6,EP400,SP1,KDM1A,FOXA2,RXRA,ZBTB7A,FOXA1,HNF4A,ARNT,HDAC1,CREM,SIN3A,TBX21,ASH2L,TRIM28,ATF7,ARID1B,MNT,HNF4G,DPF2,CBFB,POLR2A,ATF3,FOXK2,CTCF,SMARCC2,C11orf30,JUN,REST,NFIC,ZNF316,PML,CC2D1A,NCOA1,SAP30,TRIM24,LEF1,TAF1,CBFA2T3,JUND,ESR1,MAFK,TFAP4,ETS1,GATA1,MYC,SMARCA4,NR2F2,HDAC3,ZKSCAN1,FOXM1,MXI1,IRF1,ZNF384,SMAD5,TCF12,KDM5A,RUNX1,CREB1,ZNF444,TBL1XR1,NCOR1,EP300,HDAC2,SMARCE1,BACH1,C…	chr2	220082229	220084978	chr2	220083713
chr2	225160352	225165717	0.241666666666666	-0.317923069621461	0.846153846153846	0.590909090909091	0.523650198151556	0.835904304532044	80	3.56943588354842e-14	*	*	*	InterGenic	*	*	*	*	*	*	*	*	*	*	*	*	*	0	0	*	*	*	*	*	0	0	chr2-225165540:225165690	chr2	225165540	225165690	chr2	225165540	225165690	*	*	*	*	*	0
chr2	230931474	230934007	0.294230769230769	-0.114968042767531	0.714285714285714	0.413793103448276	0.55426641867416	0.658155572553922	146	2.89122869988487e-44	chr2	230924083	230933270	Intron1	-	SLC16A14	protein_coding	chr2	230931474	230933270	0.709040663245164	0.19549363230652	CpG: 107	chr2	230932468	230933550	chr2	230932468	230933270	*	*	*	*	*	0	0	chr2-230933160:230934075	chr2	230933160	230934075	chr2	230933160	230933270	CTCF,RBM39,POLR2A,ZEB2,TRIM22,RB1,CTBP1,YY1,KDM1A,NBN,FOXA1,ZEB1,RELB,RXRA,TFAP4,BACH1,TRIM28,ELF1,FOXA2,MXI1,ZNF143,JUND,SMARCA5,REST,SMC3,IKZF1,EZH2,MAX,RAD21,ZBTB33,RCOR1,ZNF384,MYB,MLLT1,TCF12,DPF2,BATF,EP300,PAX5,XRCC5,SKIL,ARNT,ZNF687,SPI1,IKZF2,TBX21,EED,EBF1,POU2F2,YY1,RNF2,RBBP5,TAF1,KDM4A,CTCF,ZFX,ASH2L,TAF15,DPF2,POLR2A,CREM,HNRNPL,RAD21,EBF1,HDAC6,MXI1,POLR2A,YY1,CLOCK,L3MBTL2,ZNF217,…	chr2	230931399	230934453	chr2	230931474
chr2	230931474	230934007	0.294230769230769	-0.114968042767531	0.714285714285714	0.413793103448276	0.55426641867416	0.658155572553922	146	2.89122869988487e-44	chr2	230933271	230933715	FirstExon	-	SLC16A14	protein_coding	chr2	230933271	230933715	0.175286221871299	1	CpG: 107	chr2	230932468	230933550	chr2	230933271	230933550	*	*	*	*	*	0	0	chr2-230933160:230934075	chr2	230933160	230934075	chr2	230933271	230933715	CTCF,RBM39,POLR2A,ZEB2,TRIM22,RB1,CTBP1,YY1,KDM1A,NBN,FOXA1,ZEB1,RELB,RXRA,TFAP4,BACH1,TRIM28,ELF1,FOXA2,MXI1,ZNF143,JUND,SMARCA5,REST,SMC3,IKZF1,EZH2,MAX,RAD21,ZBTB33,RCOR1,ZNF384,MYB,MLLT1,TCF12,DPF2,BATF,EP300,PAX5,XRCC5,SKIL,ARNT,ZNF687,SPI1,IKZF2,TBX21,EED,EBF1,POU2F2,YY1,RNF2,RBBP5,TAF1,KDM4A,CTCF,ZFX,ASH2L,TAF15,DPF2,POLR2A,CREM,HNRNPL,RAD21,EBF1,HDAC6,MXI1,POLR2A,YY1,CLOCK,L3MBTL2,ZNF217,…	chr2	230931399	230934453	chr2	230933271
chr2	230931474	230934007	0.294230769230769	-0.114968042767531	0.714285714285714	0.413793103448276	0.55426641867416	0.658155572553922	146	2.89122869988487e-44	chr2	230933716	230934716	Promoter	-	SLC16A14	protein_coding	chr2	230933716	230934007	0.11488353730754	0.291	*	*	*	*	*	0	0	*	*	*	*	*	0	0	chr2-230933160:230934075	chr2	230933160	230934075	chr2	230933716	230934007	CTCF,RBM39,POLR2A,ZEB2,TRIM22,RB1,CTBP1,YY1,KDM1A,NBN,FOXA1,ZEB1,RELB,RXRA,TFAP4,BACH1,TRIM28,ELF1,FOXA2,MXI1,ZNF143,JUND,SMARCA5,REST,SMC3,IKZF1,EZH2,MAX,RAD21,ZBTB33,RCOR1,ZNF384,MYB,MLLT1,TCF12,DPF2,BATF,EP300,PAX5,XRCC5,SKIL,ARNT,ZNF687,SPI1,IKZF2,TBX21,EED,EBF1,POU2F2,YY1,RNF2,RBBP5,TAF1,KDM4A,CTCF,ZFX,ASH2L,TAF15,DPF2,POLR2A,CREM,HNRNPL,RAD21,EBF1,HDAC6,MXI1,POLR2A,YY1,CLOCK,L3MBTL2,ZNF217,…	chr2	230931399	230934453	chr2	230933716
chr2	238443104	238455887	0.21474358974359	-0.260941199690033	0.833333333333333	0.6	0.561825099075778	0.822610443150088	197	5.79445134721032e-28	chr2	238436160	238443206	Intron8	+	MLPH	protein_coding	chr2	238443104	238443206	0.00797934757099272	0.0144762986091399	*	*	*	*	*	0	0	*	*	*	*	*	0	0	chr2-238443045:238443235	chr2	238443045	238443235	chr2	238443104	238443206	EGR1,EBF1,FOXA2,FOS,POLR2A,ZNF316,MAFK,MAFF	chr2	238442196	238443420	chr2	238443104
chr2	238443104	238455887	0.21474358974359	-0.260941199690033	0.833333333333333	0.6	0.561825099075778	0.822610443150088	197	5.79445134721032e-28	chr2	238443207	238443290	Exon9	+	MLPH	protein_coding	chr2	238443207	238443290	0.00649299851365094	1	*	*	*	*	*	0	0	*	*	*	*	*	0	0	chr2-238443045:238443235	chr2	238443045	238443235	chr2	238443207	238443235	EGR1,EBF1,FOXA2,FOS,POLR2A,ZNF316,MAFK,MAFF	chr2	238442196	238443420	chr2	238443207
chr2	238443104	238455887	0.21474358974359	-0.260941199690033	0.833333333333333	0.6	0.561825099075778	0.822610443150088	197	5.79445134721032e-28	chr2	238443291	238448990	Intron9	+	MLPH	protein_coding	chr2	238443291	238448990	0.44582648830478	1	*	*	*	*	*	0	0	*	*	*	*	*	0	0	chr2-238448445:238449035	chr2	238448445	238449035	chr2	238448445	238448990	JUND,POLR2A	chr2	238448846	238449158	chr2	238448846
chr2	238443104	238455887	0.21474358974359	-0.260941199690033	0.833333333333333	0.6	0.561825099075778	0.822610443150088	197	5.79445134721032e-28	chr2	238448991	238449176	Exon10	+	MLPH	protein_coding	chr2	238448991	238449176	0.0144723460846437	1	*	*	*	*	*	0	0	*	*	*	*	*	0	0	chr2-238449165:238449435	chr2	238449165	238449435	chr2	238449165	238449176	JUND,POLR2A	chr2	238448846	238449158	chr2	238448991
chr2	238443104	238455887	0.21474358974359	-0.260941199690033	0.833333333333333	0.6	0.561825099075778	0.822610443150088	197	5.79445134721032e-28	chr2	238449177	238449444	Intron10	+	MLPH	protein_coding	chr2	238449177	238449444	0.0208871157005398	1	*	*	*	*	*	0	0	*	*	*	*	*	0	0	chr2-238449165:238449435	chr2	238449165	238449435	chr2	238449177	238449435	FOXA1,TFAP4,SMARCA4,JUND,NR3C1,ZNF687,YY1,MAX,HNF4A,HNF4G,NR2F2,RXRA,SP1,RAD21,MEF2B,POLR2A,NR2C1,NR2F6,NR2F1,SMARCA4,EBF1	chr2	238449375	238450415	chr2	238449375
chr2	238443104	238455887	0.21474358974359	-0.260941199690033	0.833333333333333	0.6	0.561825099075778	0.822610443150088	197	5.79445134721032e-28	chr2	238449445	238449600	Exon11	+	MLPH	protein_coding	chr2	238449445	238449600	0.0121254791519987	1	*	*	*	*	*	0	0	*	*	*	*	*	0	0	chr2-238449525:238449915	chr2	238449525	238449915	chr2	238449525	238449600	FOXA1,TFAP4,SMARCA4,JUND,NR3C1,ZNF687,YY1,MAX,HNF4A,HNF4G,NR2F2,RXRA,SP1,RAD21,MEF2B,POLR2A,NR2C1,NR2F6,NR2F1,SMARCA4,EBF1	chr2	238449375	238450415	chr2	238449445
chr2	238443104	238455887	0.21474358974359	-0.260941199690033	0.833333333333333	0.6	0.561825099075778	0.822610443150088	197	5.79445134721032e-28	chr2	238449601	238451209	Intron11	+	MLPH	protein_coding	chr2	238449601	238451209	0.125792067589768	1	*	*	*	*	*	0	0	*	*	*	*	*	0	0	chr2-238450905:238451315	chr2	238450905	238451315	chr2	238450905	238451209	POLR2A	chr2	238450477	238451049	chr2	238450477
chr2	238443104	238455887	0.21474358974359	-0.260941199690033	0.833333333333333	0.6	0.561825099075778	0.822610443150088	197	5.79445134721032e-28	chr2	238451210	238451302	Exon12	+	MLPH	protein_coding	chr2	238451210	238451302	0.00719705859344442	1	*	*	*	*	*	0	0	*	*	*	*	*	0	0	chr2-238450905:238451315	chr2	238450905	238451315	chr2	238451210	238451302	*	*	*	*	*	0
chr2	238443104	238455887	0.21474358974359	-0.260941199690033	0.833333333333333	0.6	0.561825099075778	0.822610443150088	197	5.79445134721032e-28	chr2	238451303	238455248	Intron12	+	MLPH	protein_coding	chr2	238451303	238455248	0.308613001642807	1	*	*	*	*	*	0	0	*	*	*	*	*	0	0	chr2-238455045:238455315	chr2	238455045	238455315	chr2	238455045	238455248	*	*	*	*	*	0
chr2	238443104	238455887	0.21474358974359	-0.260941199690033	0.833333333333333	0.6	0.561825099075778	0.822610443150088	197	5.79445134721032e-28	chr2	238455249	238455326	Exon13	+	MLPH	protein_coding	chr2	238455249	238455326	0.00602362512712196	1	*	*	*	*	*	0	0	*	*	*	*	*	0	0	chr2-238455045:238455315	chr2	238455045	238455315	chr2	238455249	238455315	*	*	*	*	*	0
chr2	238443104	238455887	0.21474358974359	-0.260941199690033	0.833333333333333	0.6	0.561825099075778	0.822610443150088	197	5.79445134721032e-28	chr2	238455327	238457863	Intron13	+	MLPH	protein_coding	chr2	238455327	238455887	0.0438081827427052	0.220820189274448	*	*	*	*	*	0	0	*	*	*	*	*	0	0	chr2-238455520:238455995	chr2	238455520	238455995	chr2	238455520	238455887	POLR2A,ZNF579	chr2	238455460	238455965	chr2	238455460
chr2	238455906	238456662	0.217171717171717	0.16359445705825	0.294117647058824	0.173913043478261	0.653049305675748	0.468226157687857	16	0.0293998453635473	chr2	238455327	238457863	Intron13	+	MLPH	protein_coding	chr2	238455906	238456662	1	0.298107255520505	*	*	*	*	*	0	0	*	*	*	*	*	0	0	chr2-238456465:238456895	chr2	238456465	238456895	chr2	238456465	238456662	REST,SUZ12,POLR2A,SP1,FOXA2,MAX,RXRA,FOXA1,HNF4A,RAD21,YY1	chr2	238455985	238457300	chr2	238455985
chr2	239023570	239028807	0.233241758241758	-0.310239786841427	0.842105263157895	0.569047619047619	0.497574363109145	0.837234623948311	83	2.90003064907963e-11	chr2	239016615	239025543	Intron4	+	ESPNL	protein_coding	chr2	239023570	239025543	0.37674240977659	0.220990143369176	*	*	*	*	*	0	0	*	*	*	*	*	0	0	chr2-239025385:239025650	chr2	239025385	239025650	chr2	239025385	239025543	EGR1,RBFOX2,POLR2G,NRF1,ZNF592,ARID1B,MAX,ZBTB33,CTCF,RAD21,HNF4A,RXRA,SP1	chr2	239022897	239024312	chr2	239023570
chr2	239023570	239028807	0.233241758241758	-0.310239786841427	0.842105263157895	0.569047619047619	0.497574363109145	0.837234623948311	83	2.90003064907963e-11	chr2	239025544	239025675	Exon5	+	ESPNL	protein_coding	chr2	239025544	239025675	0.0250143211762459	1	*	*	*	*	*	0	0	*	*	*	*	*	0	0	chr2-239025385:239025650	chr2	239025385	239025650	chr2	239025544	239025650	*	*	*	*	*	0
chr2	239023570	239028807	0.233241758241758	-0.310239786841427	0.842105263157895	0.569047619047619	0.497574363109145	0.837234623948311	83	2.90003064907963e-11	chr2	239025676	239033910	Intron5	+	ESPNL	protein_coding	chr2	239025676	239028807	0.597861371013939	0.380252611124605	*	*	*	*	*	0	0	*	*	*	*	*	0	0	chr2-239028185:239028755	chr2	239028185	239028755	chr2	239028185	239028755	IKZF1,EBF1,CTCF,SRF,HNRNPLL,RBM39,CTCF,XRCC5,TFAP4,RAD21,PKNOX1,PCBP1,SMARCA4	chr2	239028357	239029927	chr2	239028357
chr2	240080306	240081543	0.255827505827506	-0.46224482798732	0.928571428571429	0.607692307692308	0.330421420178476	0.83392363882383	39	8.6172249938677e-11	chr2	240078470	240085498	Intron6	-	HDAC4	protein_coding	chr2	240080306	240081543	1	0.176010244735344	*	*	*	*	*	0	0	chr2:240080723-240081253	chr2	240080723	240081253	chr2	240080723	240081253	chr2-240081385:240081655	chr2	240081385	240081655	chr2	240081385	240081543	RFX1,MYC,SMC3,CTCF,RAD21,ZBTB33,SMC3,REST,L3MBTL2,RAD21,MAX,MGA,NFATC1,USF1,RBM22,USF2,E2F6,RAD51,SMARCA4,PBX3,FOXA1,ZNF639,BCL3,STAT5A,ATM,EGR1	chr2	240079517	240081223	chr2	240080306
chr2	241561712	241565772	0.22488038277512	-0.23341795458517	0.818181818181818	0.583333333333333	0.561825099075778	0.806098611351496	68	6.22936891767328e-12	chr2	241558449	241569365	Intron5	+	GPR35	protein_coding	chr2	241561712	241565772	1	0.371931110296812	CpG: 38	chr2	241562469	241562910	chr2	241562469	241562910	*	*	*	*	*	0	0	chr2-241565245:241565395	chr2	241565245	241565395	chr2	241565245	241565395	POLR2G,AGO2,GABPB1,GABPA,ELF1,MAX,BHLHE40,USF1,AGO2,HNRNPL,RBM22,KDM1A,IKZF2,ZBTB33,PAX5,IKZF1,C11orf30,ZBTB7A,ZNF316,EBF1,RELB,POLR2A,EED,MAX,NFE2,NFE2L2,PKNOX1,RUNX3,MAFK,CTCF,EGR1,BHLHE40,NR2F1,SPI1,PBX3	chr2	241563362	241565177	chr2	241563362
chr2	241668455	241674384	0.244444444444444	-0.309815614842261	0.846153846153846	0.55	0.523650198151556	0.849758356903571	100	1.79516115056227e-13	chr2	241666358	241676479	Intron36	-	KIF1A	protein_coding	chr2	241668455	241674384	1	0.585811678687877	*	*	*	*	*	0	0	*	*	*	*	*	0	0	chr2-241674025:241674175	chr2	241674025	241674175	chr2	241674025	241674175	PKNOX1,EZH2,CTCF,RAD21	chr2	241672840	241674000	chr2	241672840
chr2	241712646	241723518	0.215763546798029	-0.390601982879485	0.9	0.631481481481482	0.436432222745668	0.836609898497573	215	7.66948045910062e-38	chr2	241712531	241712673	Exon13	-	KIF1A	protein_coding	chr2	241712646	241712673	0.00248344370860927	0.190140845070423	*	*	*	*	*	0	0	*	*	*	*	*	0	0	*	*	*	*	*	0	0	*	*	*	*	*	0
chr2	241712646	241723518	0.215763546798029	-0.390601982879485	0.9	0.631481481481482	0.436432222745668	0.836609898497573	215	7.66948045910062e-38	chr2	241712674	241713599	Intron12	-	KIF1A	protein_coding	chr2	241712674	241713599	0.0850809418690213	1	*	*	*	*	*	0	0	*	*	*	*	*	0	0	chr2-241712925:241713075	chr2	241712925	241713075	chr2	241712925	241713075	*	*	*	*	*	0
chr2	241712646	241723518	0.215763546798029	-0.390601982879485	0.9	0.631481481481482	0.436432222745668	0.836609898497573	215	7.66948045910062e-38	chr2	241713600	241713678	Exon12	-	KIF1A	protein_coding	chr2	241713600	241713678	0.00717439293598234	1	*	*	*	*	*	0	0	*	*	*	*	*	0	0	*	*	*	*	*	0	0	*	*	*	*	*	0
chr2	241712646	241723518	0.215763546798029	-0.390601982879485	0.9	0.631481481481482	0.436432222745668	0.836609898497573	215	7.66948045910062e-38	chr2	241713679	241715267	Intron11	-	KIF1A	protein_coding	chr2	241713679	241715267	0.146063281824871	1	*	*	*	*	*	0	0	*	*	*	*	*	0	0	chr2-241714305:241714455	chr2	241714305	241714455	chr2	241714305	241714455	POLR2A	chr2	241714340	241714984	chr2	241714340
chr2	241712646	241723518	0.215763546798029	-0.390601982879485	0.9	0.631481481481482	0.436432222745668	0.836609898497573	215	7.66948045910062e-38	chr2	241715268	241715343	Exon11	-	KIF1A	protein_coding	chr2	241715268	241715343	0.00689845474613687	1	*	*	*	*	*	0	0	*	*	*	*	*	0	0	*	*	*	*	*	0	0	*	*	*	*	*	0
chr2	241712646	241723518	0.215763546798029	-0.390601982879485	0.9	0.631481481481482	0.436432222745668	0.836609898497573	215	7.66948045910062e-38	chr2	241715344	241722006	Intron10	-	KIF1A	protein_coding	chr2	241715344	241722006	0.612766740250184	1	CpG: 94	chr2	241720950	241722114	chr2	241720950	241722006	chr2:241719463-241720148	chr2	241719463	241720148	chr2	241719463	241720148	chr2-241721505:241722355	chr2	241721505	241722355	chr2	241721505	241722006	EGR1	chr2	241721950	241722194	chr2	241721950
chr2	241712646	241723518	0.215763546798029	-0.390601982879485	0.9	0.631481481481482	0.436432222745668	0.836609898497573	215	7.66948045910062e-38	chr2	241722007	241722024	Exon10	-	KIF1A	protein_coding	chr2	241722007	241722024	0.00156364974245769	1	CpG: 94	chr2	241720950	241722114	chr2	241722007	241722024	*	*	*	*	*	0	0	chr2-241721505:241722355	chr2	241721505	241722355	chr2	241722007	241722024	EGR1	chr2	241721950	241722194	chr2	241722007
chr2	241712646	241723518	0.215763546798029	-0.390601982879485	0.9	0.631481481481482	0.436432222745668	0.836609898497573	215	7.66948045910062e-38	chr2	241722025	241722460	Intron9	-	KIF1A	protein_coding	chr2	241722025	241722460	0.0400110375275938	1	CpG: 94	chr2	241720950	241722114	chr2	241722025	241722114	*	*	*	*	*	0	0	chr2-241721505:241722355	chr2	241721505	241722355	chr2	241722025	241722355	EGR1	chr2	241721950	241722194	chr2	241722025
chr2	241712646	241723518	0.215763546798029	-0.390601982879485	0.9	0.631481481481482	0.436432222745668	0.836609898497573	215	7.66948045910062e-38	chr2	241722461	241722526	Exon9	-	KIF1A	protein_coding	chr2	241722461	241722526	0.00597866077998528	1	*	*	*	*	*	0	0	*	*	*	*	*	0	0	chr2-241722465:241723455	chr2	241722465	241723455	chr2	241722465	241722526	NFIB	chr2	241722475	241722855	chr2	241722475
chr2	241712646	241723518	0.215763546798029	-0.390601982879485	0.9	0.631481481481482	0.436432222745668	0.836609898497573	215	7.66948045910062e-38	chr2	241722527	241723155	Intron8	-	KIF1A	protein_coding	chr2	241722527	241723155	0.0577630610743194	1	*	*	*	*	*	0	0	*	*	*	*	*	0	0	chr2-241722465:241723455	chr2	241722465	241723455	chr2	241722527	241723155	NFIB	chr2	241722475	241722855	chr2	241722527
chr2	241712646	241723518	0.215763546798029	-0.390601982879485	0.9	0.631481481481482	0.436432222745668	0.836609898497573	215	7.66948045910062e-38	chr2	241723156	241723233	Exon8	-	KIF1A	protein_coding	chr2	241723156	241723233	0.00708241353936718	1	*	*	*	*	*	0	0	*	*	*	*	*	0	0	chr2-241722465:241723455	chr2	241722465	241723455	chr2	241723156	241723233	*	*	*	*	*	0
chr2	241712646	241723518	0.215763546798029	-0.390601982879485	0.9	0.631481481481482	0.436432222745668	0.836609898497573	215	7.66948045910062e-38	chr2	241723234	241724405	Intron7	-	KIF1A	protein_coding	chr2	241723234	241723518	0.0261221486387049	0.242527754056362	*	*	*	*	*	0	0	*	*	*	*	*	0	0	chr2-241722465:241723455	chr2	241722465	241723455	chr2	241723234	241723455	*	*	*	*	*	0
chr2	242702903	242710249	0.225694444444444	-0.32143492829997	0.872282608695652	0.636111111111111	0.479751339070625	0.824507505719037	193	2.86206668384718e-39	chr2	242695430	242707124	Intron9	+	D2HGDH	protein_coding	chr2	242702903	242707124	0.574598420909338	0.360954335556696	*	*	*	*	*	0	0	chr2:242703731-242703954	chr2	242703731	242703954	chr2	242703731	242703954	chr2-242706925:242707155	chr2	242706925	242707155	chr2	242706925	242707124	HNRNPK,AGO2,AGO1,TAF15,RBFOX2,RBM39,PCBP1,POLR2G,POLR2A,HNRNPL,POLR2G,TAF15,HNRNPL,RBFOX2,RBM22,KDM1A	chr2	242707006	242709061	chr2	242707006
chr2	242702903	242710249	0.225694444444444	-0.32143492829997	0.872282608695652	0.636111111111111	0.479751339070625	0.824507505719037	193	2.86206668384718e-39	chr2	242707125	242708226	LastExon	+	D2HGDH	protein_coding	chr2	242707125	242708226	0.149877484345222	1	*	*	*	*	*	0	0	*	*	*	*	*	0	0	chr2-242708125:242708655	chr2	242708125	242708655	chr2	242708125	242708226	HNRNPK,AGO2,AGO1,TAF15,RBFOX2,RBM39,PCBP1,POLR2G,POLR2A,HNRNPL,POLR2G,TAF15,HNRNPL,RBFOX2,RBM22,KDM1A	chr2	242707006	242709061	chr2	242707125
chr2	242985064	242989074	0.22	-0.287541890065993	0.842105263157895	0.607142857142857	0.530639062229566	0.83466584244495	144	1.17292915972228e-20	chr2	242908199	243020610	Intron3	+	AC131097.3	antisense	chr2	242985064	242989074	1	0.0356726654864737	CpG: 174	chr2	242988705	242989857	chr2	242988705	242989074	*	*	*	*	*	0	0	chr2-242988585:242988875	chr2	242988585	242988875	chr2	242988585	242988875	HNRNPLL	chr2	242988628	242988885	chr2	242988628
chr3	4909704	4910535	0.233211233211232	0.0961737728846985	0.518518518518518	0.277777777777778	0.600240240230899	0.493560431401737	77	5.81366335721984e-25	chr3	4872703	4927406	Intron2	-	AC018816.3	protein_coding	chr3	4909704	4910535	1	0.0151911229731459	CpG: 67	chr3	4909962	4910537	chr3	4909962	4910535	chr3:4909917-4910799	chr3	4909917	4910799	chr3	4909917	4910535	chr3-4909080:4909715	chr3	4909080	4909715	chr3	4909704	4909715	ZBTB2,YY1,ZBTB33,POLR2A,TAF1,REST,RXRA,SP1,ZNF318,CTBP1,IKZF1,EP300,HNF4G,HNF4A,ATF3,CTCF,RAD21,STAT3,CTCF,ATF3,EGR1,HDAC3,POLR2A,RNF2,RXRA,KDM5B,YY1,RBFOX2,HNF4A,TAF1,EP300,TCF12,MIER1,ELF1,BRD4,SIX5,WHSC1,SMARCA5,HDAC2,ZFX,PHF8,EED,ZSCAN29,IKZF1,ATF4,NCOA1,NFRKB,MLLT1,CTCF,AFF1,SMARCE1,SMARCA4,ARNT,ASH2L,ZNF24,RELB,LEF1,BRD9,NR2F1,FOXK2,NR3C1,NBN,ARID1B,BCOR,HES1,ZBTB33,ZBTB40,ELK1,CC2D1A,ARID2…	chr3	4908332	4911360	chr3	4909704
chr3	12594507	12595816	0.224603174603175	0.0708185396773595	0.523809523809524	0.271956856702619	0.66553556072757	0.566252168149253	31	2.81400350737233e-08	chr3	12584729	12602255	Intron1	-	C3orf83	protein_coding	chr3	12594507	12595816	1	0.0746890334360379	*	*	*	*	*	0	0	*	*	*	*	*	0	0	chr3-12595260:12595350	chr3	12595260	12595350	chr3	12595260	12595350	NBN,ZNF830,CBX2,ARID3A,ASH2L,NRF1,MXI1,ZBTB40,ZBTB7A,SMARCA4,YY1,PHF8,TAF1,BCOR,SMARCE1,KDM4A,EP300,MTA2,POLR2A,ZHX2,IKZF1,KDM5B,GMEB1,HDAC1,MLLT1,BMI1,RBFOX2,HDAC2,NFRKB,NBN,HNRNPLL,POLR2G,CTBP1,IKZF2,SIN3A,EED,MTA3,ZNF592,CTCF,HDAC6,XRCC5,MYNN,MBD2,EBF1,MAX,EP400,ATF4,POLR2G,ZBTB40,MLLT1	chr3	12594750	12596924	chr3	12594750
chr3	16783583	16795340	0.206521739130435	-0.333548359974138	0.857142857142857	0.636363636363636	0.558912343350711	0.892366918566668	108	1.03454805840794e-15	*	*	*	InterGenic	*	*	*	*	*	*	*	*	*	*	*	*	*	0	0	*	*	*	*	*	0	0	chr3-16783360:16783755	chr3	16783360	16783755	chr3	16783583	16783755	ZNF274,ATF3,JUNB,CREB1,BCL11A,JUND,FOS,RUNX3,NFIC,ZNF316,MAFK,MYC,CTCF,POLR2A,TBX21,MEF2A	chr3	16782743	16784111	chr3	16783583
chr3	32502735	32508975	0.202033775034148	-0.425115900660091	0.916666666666667	0.704005006257822	0.385166972355094	0.802914326859772	103	3.87649996093188e-23	*	*	*	InterGenic	*	*	*	*	*	*	*	*	*	*	*	*	*	0	0	chr3:32506024-32506133	chr3	32506024	32506133	chr3	32506024	32506133	chr3-32502660:32502830	chr3	32502660	32502830	chr3	32502735	32502830	RNF2,IKZF1,ATF7,ATF3,SOX6,SMARCA4,NR2F1,HDAC2,NR2F6,KDM1A,ZEB2,ATF4,MEIS2,MTA1,CBFA2T3,BCOR,TCF12,CTBP1,HES1,L3MBTL2,ESR1,ARID1B,HDAC1,ESRRA,PHB2,FOXA2,FOXA1	chr3	32502407	32503524	chr3	32502735
chr3	38110449	38125590	0.23015873015873	-0.392448222563968	0.866666666666667	0.621621621621622	0.457213587395619	0.865723287923706	226	1.22436469404164e-37	chr3	38105411	38125648	Intron6	+	DLEC1	protein_coding	chr3	38110449	38125590	1	0.74818401937046	*	*	*	*	*	0	0	*	*	*	*	*	0	0	chr3-38110925:38111150	chr3	38110925	38111150	chr3	38110925	38111150	CEBPB	chr3	38111563	38111849	chr3	38111563
chr3	43052850	43059959	0.286274509803921	-0.049621620704844	0.736842105263158	0.4375	0.75	0.783864574449585	36	3.47809533273264e-06	chr3	42983564	43095012	Intron4	+	KRBOX1	protein_coding	chr3	43052850	43059959	1	0.063787596008901	*	*	*	*	*	0	0	*	*	*	*	*	0	0	chr3-43053280:43053670	chr3	43053280	43053670	chr3	43053280	43053670	CREB1	chr3	43052994	43053430	chr3	43052994
chr3	43052850	43059959	0.286274509803921	-0.049621620704844	0.736842105263158	0.4375	0.75	0.783864574449585	36	3.47809533273264e-06	chr3	43021138	43073758	Intron1	+	FAM198A	protein_coding	chr3	43052850	43059959	1	0.135100722158875	*	*	*	*	*	0	0	*	*	*	*	*	0	0	chr3-43053280:43053670	chr3	43053280	43053670	chr3	43053280	43053670	CREB1	chr3	43052994	43053430	chr3	43052994
chr3	48673969	48689412	0.211751662971175	-0.375041787200465	0.888888888888889	0.645161290322581	0.462091364631989	0.8512022563482	296	2.40994954227791e-55	chr3	48673902	48675665	LastExon	-	CELSR3	protein_coding	chr3	48673969	48675665	0.109823220876773	0.961996596710153	*	*	*	*	*	0	0	*	*	*	*	*	0	0	chr3-48673745:48674315	chr3	48673745	48674315	chr3	48673969	48674315	FOXA2,CTCF,TFAP4,FOXA1	chr3	48674743	48675524	chr3	48674743
chr3	48673969	48689412	0.211751662971175	-0.375041787200465	0.888888888888889	0.645161290322581	0.462091364631989	0.8512022563482	296	2.40994954227791e-55	chr3	48675666	48677106	Intron34	-	CELSR3	protein_coding	chr3	48675666	48677106	0.0932461309331089	1	*	*	*	*	*	0	0	*	*	*	*	*	0	0	chr3-48675505:48675755	chr3	48675505	48675755	chr3	48675666	48675755	*	*	*	*	*	0
chr3	48673969	48689412	0.211751662971175	-0.375041787200465	0.888888888888889	0.645161290322581	0.462091364631989	0.8512022563482	296	2.40994954227791e-55	chr3	48677107	48677992	Exon34	-	CELSR3	protein_coding	chr3	48677107	48677992	0.0573075179693065	1	CpG: 27	chr3	48677529	48677877	chr3	48677529	48677877	*	*	*	*	*	0	0	chr3-48677245:48677415	chr3	48677245	48677415	chr3	48677245	48677415	CTCF,ZNF444	chr3	48677846	48678303	chr3	48677846
chr3	48673969	48689412	0.211751662971175	-0.375041787200465	0.888888888888889	0.645161290322581	0.462091364631989	0.8512022563482	296	2.40994954227791e-55	chr3	48677993	48678756	Intron33	-	CELSR3	protein_coding	chr3	48677993	48678756	0.0494074985430292	1	*	*	*	*	*	0	0	*	*	*	*	*	0	0	chr3-48677885:48678215	chr3	48677885	48678215	chr3	48677993	48678215	CTCF,ZNF444	chr3	48677846	48678303	chr3	48677993
chr3	48673969	48689412	0.211751662971175	-0.375041787200465	0.888888888888889	0.645161290322581	0.462091364631989	0.8512022563482	296	2.40994954227791e-55	chr3	48678757	48678957	Exon33	-	CELSR3	protein_coding	chr3	48678757	48678957	0.0129508515184873	1	*	*	*	*	*	0	0	*	*	*	*	*	0	0	chr3-48678445:48678875	chr3	48678445	48678875	chr3	48678757	48678875	NR2F2,NR2F6,NR2F1,NR2C1	chr3	48678762	48679252	chr3	48678762
chr3	48673969	48689412	0.211751662971175	-0.375041787200465	0.888888888888889	0.645161290322581	0.462091364631989	0.8512022563482	296	2.40994954227791e-55	chr3	48678958	48679283	Intron32	-	CELSR3	protein_coding	chr3	48678958	48679283	0.0210451337175419	1	*	*	*	*	*	0	0	*	*	*	*	*	0	0	chr3-48678885:48679075	chr3	48678885	48679075	chr3	48678958	48679075	NR2F2,NR2F6,NR2F1,NR2C1	chr3	48678762	48679252	chr3	48678958
chr3	48673969	48689412	0.211751662971175	-0.375041787200465	0.888888888888889	0.645161290322581	0.462091364631989	0.8512022563482	296	2.40994954227791e-55	chr3	48679284	48679442	Exon32	-	CELSR3	protein_coding	chr3	48679284	48679442	0.010231172699605	1	*	*	*	*	*	0	0	*	*	*	*	*	0	0	*	*	*	*	*	0	0	*	*	*	*	*	0
chr3	48673969	48689412	0.211751662971175	-0.375041787200465	0.888888888888889	0.645161290322581	0.462091364631989	0.8512022563482	296	2.40994954227791e-55	chr3	48679443	48679790	Intron31	-	CELSR3	protein_coding	chr3	48679443	48679790	0.0224697273845755	1	*	*	*	*	*	0	0	*	*	*	*	*	0	0	chr3-48679665:48679815	chr3	48679665	48679815	chr3	48679665	48679790	*	*	*	*	*	0
chr3	48673969	48689412	0.211751662971175	-0.375041787200465	0.888888888888889	0.645161290322581	0.462091364631989	0.8512022563482	296	2.40994954227791e-55	chr3	48679791	48679900	Exon31	-	CELSR3	protein_coding	chr3	48679791	48679900	0.0070582140775756	1	*	*	*	*	*	0	0	*	*	*	*	*	0	0	chr3-48679665:48679815	chr3	48679665	48679815	chr3	48679791	48679815	*	*	*	*	*	0
chr3	48673969	48689412	0.211751662971175	-0.375041787200465	0.888888888888889	0.645161290322581	0.462091364631989	0.8512022563482	296	2.40994954227791e-55	chr3	48679901	48680168	Intron30	-	CELSR3	protein_coding	chr3	48679901	48680168	0.0172893867771806	1	*	*	*	*	*	0	0	*	*	*	*	*	0	0	chr3-48679945:48680335	chr3	48679945	48680335	chr3	48679945	48680168	AGO2	chr3	48680066	48680730	chr3	48680066
chr3	48673969	48689412	0.211751662971175	-0.375041787200465	0.888888888888889	0.645161290322581	0.462091364631989	0.8512022563482	296	2.40994954227791e-55	chr3	48680169	48680317	Exon30	-	CELSR3	protein_coding	chr3	48680169	48680317	0.00958363012368063	1	*	*	*	*	*	0	0	*	*	*	*	*	0	0	chr3-48679945:48680335	chr3	48679945	48680335	chr3	48680169	48680317	AGO2	chr3	48680066	48680730	chr3	48680169
chr3	48673969	48689412	0.211751662971175	-0.375041787200465	0.888888888888889	0.645161290322581	0.462091364631989	0.8512022563482	296	2.40994954227791e-55	chr3	48680318	48680399	Intron29	-	CELSR3	protein_coding	chr3	48680318	48680399	0.00524509486498737	1	*	*	*	*	*	0	0	*	*	*	*	*	0	0	chr3-48679945:48680335	chr3	48679945	48680335	chr3	48680318	48680335	AGO2	chr3	48680066	48680730	chr3	48680318
chr3	48673969	48689412	0.211751662971175	-0.375041787200465	0.888888888888889	0.645161290322581	0.462091364631989	0.8512022563482	296	2.40994954227791e-55	chr3	48680400	48680516	Exon29	-	CELSR3	protein_coding	chr3	48680400	48680516	0.00751149388072266	1	*	*	*	*	*	0	0	*	*	*	*	*	0	0	chr3-48680365:48680515	chr3	48680365	48680515	chr3	48680400	48680515	AGO2	chr3	48680066	48680730	chr3	48680400
chr3	48673969	48689412	0.211751662971175	-0.375041787200465	0.888888888888889	0.645161290322581	0.462091364631989	0.8512022563482	296	2.40994954227791e-55	chr3	48680517	48680986	Intron28	-	CELSR3	protein_coding	chr3	48680517	48680986	0.0303697468108528	1	*	*	*	*	*	0	0	*	*	*	*	*	0	0	chr3-48680985:48681135	chr3	48680985	48681135	chr3	48680985	48680986	AGO2	chr3	48680066	48680730	chr3	48680517
chr3	48673969	48689412	0.211751662971175	-0.375041787200465	0.888888888888889	0.645161290322581	0.462091364631989	0.8512022563482	296	2.40994954227791e-55	chr3	48680987	48681110	Exon28	-	CELSR3	protein_coding	chr3	48680987	48681110	0.00796477368386971	1	*	*	*	*	*	0	0	*	*	*	*	*	0	0	chr3-48680985:48681135	chr3	48680985	48681135	chr3	48680987	48681110	*	*	*	*	*	0
chr3	48673969	48689412	0.211751662971175	-0.375041787200465	0.888888888888889	0.645161290322581	0.462091364631989	0.8512022563482	296	2.40994954227791e-55	chr3	48681111	48681648	Intron27	-	CELSR3	protein_coding	chr3	48681111	48681648	0.0347730363271385	1	*	*	*	*	*	0	0	*	*	*	*	*	0	0	chr3-48680985:48681135	chr3	48680985	48681135	chr3	48681111	48681135	*	*	*	*	*	0
chr3	48673969	48689412	0.211751662971175	-0.375041787200465	0.888888888888889	0.645161290322581	0.462091364631989	0.8512022563482	296	2.40994954227791e-55	chr3	48681649	48681728	Exon27	-	CELSR3	protein_coding	chr3	48681649	48681728	0.0051155863498025	1	*	*	*	*	*	0	0	*	*	*	*	*	0	0	*	*	*	*	*	0	0	*	*	*	*	*	0
chr3	48673969	48689412	0.211751662971175	-0.375041787200465	0.888888888888889	0.645161290322581	0.462091364631989	0.8512022563482	296	2.40994954227791e-55	chr3	48681729	48682148	Intron26	-	CELSR3	protein_coding	chr3	48681729	48682148	0.027132033931231	1	*	*	*	*	*	0	0	*	*	*	*	*	0	0	chr3-48681825:48682195	chr3	48681825	48682195	chr3	48681825	48682148	*	*	*	*	*	0
chr3	48673969	48689412	0.211751662971175	-0.375041787200465	0.888888888888889	0.645161290322581	0.462091364631989	0.8512022563482	296	2.40994954227791e-55	chr3	48682149	48682261	Exon26	-	CELSR3	protein_coding	chr3	48682149	48682261	0.00725247685035291	1	*	*	*	*	*	0	0	*	*	*	*	*	0	0	chr3-48681825:48682195	chr3	48681825	48682195	chr3	48682149	48682195	*	*	*	*	*	0
chr3	48673969	48689412	0.211751662971175	-0.375041787200465	0.888888888888889	0.645161290322581	0.462091364631989	0.8512022563482	296	2.40994954227791e-55	chr3	48682262	48682467	Intron25	-	CELSR3	protein_coding	chr3	48682262	48682467	0.0132746228064495	1	*	*	*	*	*	0	0	*	*	*	*	*	0	0	chr3-48682225:48682375	chr3	48682225	48682375	chr3	48682262	48682375	*	*	*	*	*	0
chr3	48673969	48689412	0.211751662971175	-0.375041787200465	0.888888888888889	0.645161290322581	0.462091364631989	0.8512022563482	296	2.40994954227791e-55	chr3	48682468	48682642	Exon25	-	CELSR3	protein_coding	chr3	48682468	48682642	0.011267240821084	1	*	*	*	*	*	0	0	*	*	*	*	*	0	0	chr3-48682625:48682775	chr3	48682625	48682775	chr3	48682625	48682642	*	*	*	*	*	0
chr3	48673969	48689412	0.211751662971175	-0.375041787200465	0.888888888888889	0.645161290322581	0.462091364631989	0.8512022563482	296	2.40994954227791e-55	chr3	48682643	48682875	Intron24	-	CELSR3	protein_coding	chr3	48682643	48682875	0.0150229877614453	1	*	*	*	*	*	0	0	*	*	*	*	*	0	0	chr3-48682625:48682775	chr3	48682625	48682775	chr3	48682643	48682775	*	*	*	*	*	0
chr3	48673969	48689412	0.211751662971175	-0.375041787200465	0.888888888888889	0.645161290322581	0.462091364631989	0.8512022563482	296	2.40994954227791e-55	chr3	48682876	48683082	Exon24	-	CELSR3	protein_coding	chr3	48682876	48683082	0.013339377064042	1	*	*	*	*	*	0	0	*	*	*	*	*	0	0	*	*	*	*	*	0	0	*	*	*	*	*	0
chr3	48673969	48689412	0.211751662971175	-0.375041787200465	0.888888888888889	0.645161290322581	0.462091364631989	0.8512022563482	296	2.40994954227791e-55	chr3	48683083	48683174	Intron23	-	CELSR3	protein_coding	chr3	48683083	48683174	0.00589263744091174	1	*	*	*	*	*	0	0	*	*	*	*	*	0	0	*	*	*	*	*	0	0	*	*	*	*	*	0
chr3	48673969	48689412	0.211751662971175	-0.375041787200465	0.888888888888889	0.645161290322581	0.462091364631989	0.8512022563482	296	2.40994954227791e-55	chr3	48683175	48683301	Exon23	-	CELSR3	protein_coding	chr3	48683175	48683301	0.00815903645664702	1	*	*	*	*	*	0	0	*	*	*	*	*	0	0	chr3-48683205:48683355	chr3	48683205	48683355	chr3	48683205	48683301	*	*	*	*	*	0
chr3	48673969	48689412	0.211751662971175	-0.375041787200465	0.888888888888889	0.645161290322581	0.462091364631989	0.8512022563482	296	2.40994954227791e-55	chr3	48683302	48683522	Intron22	-	CELSR3	protein_coding	chr3	48683302	48683522	0.0142459366703361	1	*	*	*	*	*	0	0	*	*	*	*	*	0	0	chr3-48683205:48683355	chr3	48683205	48683355	chr3	48683302	48683355	*	*	*	*	*	0
chr3	48673969	48689412	0.211751662971175	-0.375041787200465	0.888888888888889	0.645161290322581	0.462091364631989	0.8512022563482	296	2.40994954227791e-55	chr3	48683523	48683690	Exon22	-	CELSR3	protein_coding	chr3	48683523	48683690	0.0108139610179369	1	*	*	*	*	*	0	0	*	*	*	*	*	0	0	chr3-48683365:48683615	chr3	48683365	48683615	chr3	48683523	48683615	*	*	*	*	*	0
chr3	48673969	48689412	0.211751662971175	-0.375041787200465	0.888888888888889	0.645161290322581	0.462091364631989	0.8512022563482	296	2.40994954227791e-55	chr3	48683691	48684195	Intron21	-	CELSR3	protein_coding	chr3	48683691	48684195	0.0326361458265881	1	*	*	*	*	*	0	0	*	*	*	*	*	0	0	chr3-48683765:48683915	chr3	48683765	48683915	chr3	48683765	48683915	*	*	*	*	*	0
chr3	48673969	48689412	0.211751662971175	-0.375041787200465	0.888888888888889	0.645161290322581	0.462091364631989	0.8512022563482	296	2.40994954227791e-55	chr3	48684196	48684361	Exon21	-	CELSR3	protein_coding	chr3	48684196	48684361	0.0106844525027521	1	*	*	*	*	*	0	0	*	*	*	*	*	0	0	*	*	*	*	*	0	0	*	*	*	*	*	0
chr3	48673969	48689412	0.211751662971175	-0.375041787200465	0.888888888888889	0.645161290322581	0.462091364631989	0.8512022563482	296	2.40994954227791e-55	chr3	48684362	48685273	Intron20	-	CELSR3	protein_coding	chr3	48684362	48685273	0.0589911286667098	1	*	*	*	*	*	0	0	*	*	*	*	*	0	0	chr3-48685145:48685375	chr3	48685145	48685375	chr3	48685145	48685273	*	*	*	*	*	0
chr3	48673969	48689412	0.211751662971175	-0.375041787200465	0.888888888888889	0.645161290322581	0.462091364631989	0.8512022563482	296	2.40994954227791e-55	chr3	48685274	48685429	Exon20	-	CELSR3	protein_coding	chr3	48685274	48685429	0.0100369099268277	1	*	*	*	*	*	0	0	*	*	*	*	*	0	0	chr3-48685145:48685375	chr3	48685145	48685375	chr3	48685274	48685375	*	*	*	*	*	0
chr3	48673969	48689412	0.211751662971175	-0.375041787200465	0.888888888888889	0.645161290322581	0.462091364631989	0.8512022563482	296	2.40994954227791e-55	chr3	48685430	48685698	Intron19	-	CELSR3	protein_coding	chr3	48685430	48685698	0.017354141034773	1	*	*	*	*	*	0	0	*	*	*	*	*	0	0	chr3-48685445:48685735	chr3	48685445	48685735	chr3	48685445	48685698	*	*	*	*	*	0
chr3	48673969	48689412	0.211751662971175	-0.375041787200465	0.888888888888889	0.645161290322581	0.462091364631989	0.8512022563482	296	2.40994954227791e-55	chr3	48685699	48685894	Exon19	-	CELSR3	protein_coding	chr3	48685699	48685894	0.0126270802305252	1	*	*	*	*	*	0	0	*	*	*	*	*	0	0	chr3-48685445:48685735	chr3	48685445	48685735	chr3	48685699	48685735	*	*	*	*	*	0
chr3	48673969	48689412	0.211751662971175	-0.375041787200465	0.888888888888889	0.645161290322581	0.462091364631989	0.8512022563482	296	2.40994954227791e-55	chr3	48685895	48686151	Intron18	-	CELSR3	protein_coding	chr3	48685895	48686151	0.0165770899436638	1	*	*	*	*	*	0	0	*	*	*	*	*	0	0	*	*	*	*	*	0	0	*	*	*	*	*	0
chr3	48673969	48689412	0.211751662971175	-0.375041787200465	0.888888888888889	0.645161290322581	0.462091364631989	0.8512022563482	296	2.40994954227791e-55	chr3	48686152	48686361	Exon18	-	CELSR3	protein_coding	chr3	48686152	48686361	0.0135336398368193	1	*	*	*	*	*	0	0	*	*	*	*	*	0	0	*	*	*	*	*	0	0	*	*	*	*	*	0
chr3	48673969	48689412	0.211751662971175	-0.375041787200465	0.888888888888889	0.645161290322581	0.462091364631989	0.8512022563482	296	2.40994954227791e-55	chr3	48686362	48686553	Intron17	-	CELSR3	protein_coding	chr3	48686362	48686553	0.0123680632001554	1	*	*	*	*	*	0	0	*	*	*	*	*	0	0	*	*	*	*	*	0	0	*	*	*	*	*	0
chr3	48673969	48689412	0.211751662971175	-0.375041787200465	0.888888888888889	0.645161290322581	0.462091364631989	0.8512022563482	296	2.40994954227791e-55	chr3	48686554	48686648	Exon17	-	CELSR3	protein_coding	chr3	48686554	48686648	0.00608690021368905	1	*	*	*	*	*	0	0	*	*	*	*	*	0	0	*	*	*	*	*	0	0	*	*	*	*	*	0
chr3	48673969	48689412	0.211751662971175	-0.375041787200465	0.888888888888889	0.645161290322581	0.462091364631989	0.8512022563482	296	2.40994954227791e-55	chr3	48686649	48687912	Intron16	-	CELSR3	protein_coding	chr3	48686649	48687912	0.0817846273392476	1	*	*	*	*	*	0	0	*	*	*	*	*	0	0	chr3-48686785:48687030	chr3	48686785	48687030	chr3	48686785	48687030	BCL3,NRF1,MNT	chr3	48686795	48687577	chr3	48686795
chr3	48673969	48689412	0.211751662971175	-0.375041787200465	0.888888888888889	0.645161290322581	0.462091364631989	0.8512022563482	296	2.40994954227791e-55	chr3	48687913	48688014	Exon16	-	CELSR3	protein_coding	chr3	48687913	48688014	0.00654018001683611	1	*	*	*	*	*	0	0	*	*	*	*	*	0	0	chr3-48687845:48687995	chr3	48687845	48687995	chr3	48687913	48687995	*	*	*	*	*	0
chr3	48673969	48689412	0.211751662971175	-0.375041787200465	0.888888888888889	0.645161290322581	0.462091364631989	0.8512022563482	296	2.40994954227791e-55	chr3	48688015	48688324	Intron15	-	CELSR3	protein_coding	chr3	48688015	48688324	0.0200090655960629	1	*	*	*	*	*	0	0	*	*	*	*	*	0	0	chr3-48688185:48688410	chr3	48688185	48688410	chr3	48688185	48688324	CTCF,NR2F1,NR2F2	chr3	48688059	48688966	chr3	48688059
chr3	48673969	48689412	0.211751662971175	-0.375041787200465	0.888888888888889	0.645161290322581	0.462091364631989	0.8512022563482	296	2.40994954227791e-55	chr3	48688325	48688508	Exon15	-	CELSR3	protein_coding	chr3	48688325	48688508	0.0118500291394159	1	*	*	*	*	*	0	0	*	*	*	*	*	0	0	chr3-48688185:48688410	chr3	48688185	48688410	chr3	48688325	48688410	CTCF,NR2F1,NR2F2	chr3	48688059	48688966	chr3	48688325
chr3	48673969	48689412	0.211751662971175	-0.375041787200465	0.888888888888889	0.645161290322581	0.462091364631989	0.8512022563482	296	2.40994954227791e-55	chr3	48688509	48688791	Intron14	-	CELSR3	protein_coding	chr3	48688509	48688791	0.0182607006410671	1	*	*	*	*	*	0	0	*	*	*	*	*	0	0	chr3-48688545:48688695	chr3	48688545	48688695	chr3	48688545	48688695	CTCF,NR2F1,NR2F2	chr3	48688059	48688966	chr3	48688509
chr3	48673969	48689412	0.211751662971175	-0.375041787200465	0.888888888888889	0.645161290322581	0.462091364631989	0.8512022563482	296	2.40994954227791e-55	chr3	48688792	48688912	Exon14	-	CELSR3	protein_coding	chr3	48688792	48688912	0.0077705109110924	1	*	*	*	*	*	0	0	*	*	*	*	*	0	0	*	*	*	*	*	0	0	CTCF,NR2F1,NR2F2	chr3	48688059	48688966	chr3	48688792
chr3	48673969	48689412	0.211751662971175	-0.375041787200465	0.888888888888889	0.645161290322581	0.462091364631989	0.8512022563482	296	2.40994954227791e-55	chr3	48688913	48689009	Intron13	-	CELSR3	protein_coding	chr3	48688913	48689009	0.00621640872887392	1	*	*	*	*	*	0	0	*	*	*	*	*	0	0	*	*	*	*	*	0	0	CTCF,NR2F1,NR2F2	chr3	48688059	48688966	chr3	48688913
chr3	48673969	48689412	0.211751662971175	-0.375041787200465	0.888888888888889	0.645161290322581	0.462091364631989	0.8512022563482	296	2.40994954227791e-55	chr3	48689010	48689151	Exon13	-	CELSR3	protein_coding	chr3	48689010	48689151	0.00913035032053357	1	*	*	*	*	*	0	0	*	*	*	*	*	0	0	*	*	*	*	*	0	0	*	*	*	*	*	0
chr3	48673969	48689412	0.211751662971175	-0.375041787200465	0.888888888888889	0.645161290322581	0.462091364631989	0.8512022563482	296	2.40994954227791e-55	chr3	48689152	48689309	Intron12	-	CELSR3	protein_coding	chr3	48689152	48689309	0.0101664184420126	1	*	*	*	*	*	0	0	*	*	*	*	*	0	0	*	*	*	*	*	0	0	*	*	*	*	*	0
chr3	48673969	48689412	0.211751662971175	-0.375041787200465	0.888888888888889	0.645161290322581	0.462091364631989	0.8512022563482	296	2.40994954227791e-55	chr3	48689310	48689481	Exon12	-	CELSR3	protein_coding	chr3	48689310	48689412	0.00660493427442854	0.596491228070175	*	*	*	*	*	0	0	*	*	*	*	*	0	0	*	*	*	*	*	0	0	*	*	*	*	*	0
chr3	62357967	62358659	0.272795163584637	-0.228301904088825	0.818181818181818	0.521848739495798	0.511958676472134	0.720075363415938	69	2.16153529246037e-19	chr3	62357692	62358601	Exon3	-	FEZF2	protein_coding	chr3	62357967	62358601	0.916184971098266	0.697469746974697	CpG: 162	chr3	62357639	62359774	chr3	62357967	62358601	*	*	*	*	*	0	0	chr3-62357565:62359355	chr3	62357565	62359355	chr3	62357967	62358601	CTCF,EGR1,SUZ12,EZH2,RNF2,NANOG,EZH2,SUZ12,ASH2L,MYC,KDM1A,HDAC2,JUN,RFX5,MTA1,ZNF217,MYC,CTCF,GATA2,CTCF,ASH2L,SIN3A,KDM1A,HSF1,FOS,RFX5,EGR1,EP300,ELK1,NANOG,KDM4A,RAD21,FOSL1,TBP,MTA1,MYC,RNF2,ZNF143,SRF,POLR2A,ZBTB40,RBBP5,CBX8,CHD1,CUX1,TCF12,RFX5,HSF1,MYC,ZNF507,HDAC2,KDM1A,CBX8,RFX5,ZNF143,SREBF1,POLR2A,RXRA,MYC,ASH2L,RNF2,SIN3A,RFX5,KDM4A,RBBP5,CBX8,SREBF1,JUN,ZHX2,CBX8,RAD21,RNF2,CBX8,PA…	chr3	62350839	62367376	chr3	62357967
chr3	62357967	62358659	0.272795163584637	-0.228301904088825	0.818181818181818	0.521848739495798	0.511958676472134	0.720075363415938	69	2.16153529246037e-19	chr3	62358602	62358953	Intron2	-	FEZF2	protein_coding	chr3	62358602	62358659	0.0823699421965318	0.162393162393162	CpG: 162	chr3	62357639	62359774	chr3	62358602	62358659	*	*	*	*	*	0	0	chr3-62357565:62359355	chr3	62357565	62359355	chr3	62358602	62358659	CTCF,EGR1,SUZ12,EZH2,RNF2,NANOG,EZH2,SUZ12,ASH2L,MYC,KDM1A,HDAC2,JUN,RFX5,MTA1,ZNF217,MYC,CTCF,GATA2,CTCF,ASH2L,SIN3A,KDM1A,HSF1,FOS,RFX5,EGR1,EP300,ELK1,NANOG,KDM4A,RAD21,FOSL1,TBP,MTA1,MYC,RNF2,ZNF143,SRF,POLR2A,ZBTB40,RBBP5,CBX8,CHD1,CUX1,TCF12,RFX5,HSF1,MYC,ZNF507,HDAC2,KDM1A,CBX8,RFX5,ZNF143,SREBF1,POLR2A,RXRA,MYC,ASH2L,RNF2,SIN3A,RFX5,KDM4A,RBBP5,CBX8,SREBF1,JUN,ZHX2,CBX8,RAD21,RNF2,CBX8,PA…	chr3	62350839	62367376	chr3	62358602
chr3	69434754	69435779	0.225380026152337	0.1564498487933	0.440972222222222	0.211032388663968	0.60628410128917	0.459042589218841	71	4.30851805342104e-23	chr3	69362669	69434978	Intron1	-	FRMD4B	protein_coding	chr3	69434754	69434978	0.218536585365854	0.0030978163160879	CpG: 62	chr3	69434926	69435583	chr3	69434926	69434978	*	*	*	*	*	0	0	chr3-69434905:69435655	chr3	69434905	69435655	chr3	69434905	69434978	EZH2,SUZ12,RNF2,KDM4A,ASH2L,L3MBTL2,MXI1,ZFX,ZNF687,MYC,POLR2A,DPF2,CTCF,HNRNPL,EP300,EGR1,NRF1,RAD21,SIN3A,FOS	chr3	69434294	69436477	chr3	69434754
chr3	69434754	69435779	0.225380026152337	0.1564498487933	0.440972222222222	0.211032388663968	0.60628410128917	0.459042589218841	71	4.30851805342104e-23	chr3	69434979	69435224	FirstExon	-	FRMD4B	protein_coding	chr3	69434979	69435224	0.239024390243902	1	CpG: 62	chr3	69434926	69435583	chr3	69434979	69435224	*	*	*	*	*	0	0	chr3-69434905:69435655	chr3	69434905	69435655	chr3	69434979	69435224	EZH2,SUZ12,RNF2,KDM4A,ASH2L,L3MBTL2,MXI1,ZFX,ZNF687,MYC,POLR2A,DPF2,CTCF,HNRNPL,EP300,EGR1,NRF1,RAD21,SIN3A,FOS	chr3	69434294	69436477	chr3	69434979
chr3	69434754	69435779	0.225380026152337	0.1564498487933	0.440972222222222	0.211032388663968	0.60628410128917	0.459042589218841	71	4.30851805342104e-23	chr3	69435225	69436225	Promoter	-	FRMD4B	protein_coding	chr3	69435225	69435779	0.540487804878049	0.554	CpG: 62	chr3	69434926	69435583	chr3	69435225	69435583	*	*	*	*	*	0	0	chr3-69434905:69435655	chr3	69434905	69435655	chr3	69435225	69435655	EZH2,SUZ12,RNF2,KDM4A,ASH2L,L3MBTL2,MXI1,ZFX,ZNF687,MYC,POLR2A,DPF2,CTCF,HNRNPL,EP300,EGR1,NRF1,RAD21,SIN3A,FOS	chr3	69434294	69436477	chr3	69435225
chr3	71479371	71483758	0.243443754313319	-0.35652351147968	0.894736842105263	0.626600284495022	0.464711651554832	0.803114470110419	63	3.20112717522783e-12	chr3	71408396	71542576	Intron3	-	FOXP1	protein_coding	chr3	71479371	71483758	1	0.0326948874645998	*	*	*	*	*	0	0	*	*	*	*	*	0	0	chr3-71479325:71479475	chr3	71479325	71479475	chr3	71479371	71479475	JUND,FOS	chr3	71480401	71480728	chr3	71480401
chr3	71484053	71485641	0.46268115942029	0.033478260257063	0.772727272727273	0.235294117647059	0.683158622318482	0.66239848545236	45	1.68807823798285e-15	chr3	71408396	71542576	Intron3	-	FOXP1	protein_coding	chr3	71484053	71485641	1	0.0118348487106871	*	*	*	*	*	0	0	*	*	*	*	*	0	0	chr3-71483905:71484235	chr3	71483905	71484235	chr3	71484053	71484235	HNRNPK	chr3	71485082	71485337	chr3	71485082
chr3	76779007	76781847	0.256521739130435	-0.434608023409073	0.904761904761905	0.638297872340426	0.397416953411547	0.840672595959937	44	2.30125629585556e-12	chr3	75986754	77147164	Intron2	+	ROBO2	protein_coding	chr3	76779007	76781847	1	0.00244741082893115	*	*	*	*	*	0	0	*	*	*	*	*	0	0	*	*	*	*	*	0	0	*	*	*	*	*	0
chr3	126074590	126075132	0.245541125541125	0.335737695375947	0.421936758893281	0.136363636363636	0.704005809720633	0.425802541336896	33	5.79838578839139e-09	chr3	126071791	126076079	Intron1	-	KLF15	protein_coding	chr3	126074590	126075132	1	0.126399253731343	CpG: 186	chr3	126074783	126076865	chr3	126074783	126075132	chr3:126074775-126075511	chr3	126074775	126075511	chr3	126074775	126075132	chr3-126074125:126076155	chr3	126074125	126076155	chr3	126074590	126075132	MNT,CTCF,MAX,POLR2G,HNRNPL,CTCF,RXRA,RAD21,AGO2,ZBTB33,AGO1,POLR2A,POLR2A,HNRNPL,REST,MAX,RXRA,RAD21,SP1,ZBTB33,HNF4A,GABPA,YY1,TFAP4,JUND,EGR1,EP300,KDM1A,ATF3,HNF4G,CEBPB,NR2F2,FOXA2,NRF1,FOXA1,CREB1,MAFF,ETS1,MAFK,ARID3A,FOSL2,FOS,NR2F6,RBM22,HNRNPL,TAF1,YY1,RAD21,MAX,SKI,CTCF,RXRA,FOXA1,REST,ZBTB33,ATF3,POLR2A,SP1,NR2F2,FOXA2,HNF4A,BHLHE40,HNF4G,TFAP4,TCF12,ATF4,ZNF24,ASH2L,PHF8,ETS1,ZNF316,E…	chr3	126069455	126077830	chr3	126074590
chr3	130064505	130065171	0.238782051282052	0.105432062287756	0.466666666666667	0.183673469387755	0.542229616567277	0.426890709840296	38	8.39508982514283e-10	*	*	*	InterGenic	*	*	*	*	*	*	*	*	CpG: 33	chr3	130064574	130064840	chr3	130064574	130064840	*	*	*	*	*	0	0	chr3-130064040:130065030	chr3	130064040	130065030	chr3	130064505	130065030	ZSCAN29,DPF2,SMARCA4,EZH2,IKZF1,SUZ12,PML,NFIC,PHF8,YY1,TCF12,CBFA2T2,NCOA1,TAL1,KLF16,MGA,POLR2A,ARID1B,L3MBTL2,RBBP5,SIN3A,NRF1,CBFA2T3,EP300,HMBOX1,TEAD4,NCOR1,SMARCE1,MYNN,MYC,KDM4A,RBFOX2,STAT5A,RLF,HDAC1,ZBTB7A,MAX,HNRNPLL,POLR2G,GMEB1,HDAC6,E2F6,CTBP1,CREM,HDAC2,KDM1A,ZEB2,IKZF1,REST	chr3	130063877	130065409	chr3	130064505
chr3	133133466	133141661	0.305896805896806	-0.317604750145085	0.85	0.5	0.566813239380364	0.877691942540454	104	8.86090474692602e-25	chr3	133119417	133166160	Intron1	+	BFSP2	protein_coding	chr3	133133466	133141661	1	0.175320368825279	*	*	*	*	*	0	0	*	*	*	*	*	0	0	chr3-133141345:133141795	chr3	133141345	133141795	chr3	133141345	133141661	ZMYM3,RBM25	chr3	133138003	133138383	chr3	133138003
chr3	140924327	140931151	0.232967032967033	-0.352285618979576	0.885714285714286	0.625	0.557135194480832	0.897676778621404	78	1.42372490589263e-16	*	*	*	InterGenic	*	*	*	*	*	*	*	*	*	*	*	*	*	0	0	*	*	*	*	*	0	0	chr3-140930220:140930370	chr3	140930220	140930370	chr3	140930220	140930370	CBFA2T3,TAL1,CBFA2T2	chr3	140924683	140925087	chr3	140924683
chr3	141410056	141421164	0.204644412191582	-0.375331213369451	0.866666666666667	0.627450980392157	0.523148420718294	0.894702600323445	136	5.13303819353908e-21	chr3	141409370	141432133	Intron6	+	RP11-340E6.1	lincRNA	chr3	141410056	141421164	1	0.487984887756447	*	*	*	*	*	0	0	*	*	*	*	*	0	0	chr3-141418000:141418150	chr3	141418000	141418150	chr3	141418000	141418150	CBFA2T3	chr3	141419915	141420319	chr3	141419915
chr3	143515029	143523594	0.217857142857143	-0.303786470927509	0.857142857142857	0.625	0.524805809046819	0.875981774662557	90	6.96916352287053e-16	chr3	143513920	143515667	Intron3	-	SLC9A9	protein_coding	chr3	143515029	143515667	0.0744892002335085	0.36519748139668	*	*	*	*	*	0	0	*	*	*	*	*	0	0	chr3-143514745:143515115	chr3	143514745	143515115	chr3	143515029	143515115	CTCF,RAD21,USF1	chr3	143514338	143515380	chr3	143515029
chr3	143515029	143523594	0.217857142857143	-0.303786470927509	0.857142857142857	0.625	0.524805809046819	0.875981774662557	90	6.96916352287053e-16	chr3	143515668	143515745	Exon3	-	SLC9A9	protein_coding	chr3	143515668	143515745	0.00899007589025102	1	*	*	*	*	*	0	0	*	*	*	*	*	0	0	*	*	*	*	*	0	0	*	*	*	*	*	0
chr3	143515029	143523594	0.217857142857143	-0.303786470927509	0.857142857142857	0.625	0.524805809046819	0.875981774662557	90	6.96916352287053e-16	chr3	143515746	143550860	Intron2	-	SLC9A9	protein_coding	chr3	143515746	143523594	0.916287215411559	0.223500598052059	*	*	*	*	*	0	0	*	*	*	*	*	0	0	chr3-143519940:143520150	chr3	143519940	143520150	chr3	143519940	143520150	*	*	*	*	*	0
chr3	159796745	159815423	0.251700680272109	-0.379457662015522	0.85	0.575	0.515531188098313	0.914378983166803	140	2.21484163140836e-34	chr3	159743322	159904984	Intron3	-	IL12A-AS1	antisense	chr3	159796745	159815423	1	0.115537355717485	*	*	*	*	*	0	0	*	*	*	*	*	0	0	chr3-159815145:159815355	chr3	159815145	159815355	chr3	159815145	159815355	PKNOX1	chr3	159814161	159814563	chr3	159814161
chr3	160167892	160168657	0.261128364389234	-0.20404470092702	0.785714285714286	0.50531914893617	0.538001820951407	0.74760438178161	37	1.087643399328e-09	chr3	160167618	160168618	Promoter	-	RP11-432B6.3	protein_coding	chr3	160167892	160168618	0.949019607843137	0.726	CpG: 85	chr3	160167184	160168200	chr3	160167892	160168200	*	*	*	*	*	0	0	chr3-160168480:160168950	chr3	160168480	160168950	chr3	160168480	160168618	ZBTB7A,NRF1,POLR2A,ZBTB33,MAX,MLLT1,RBFOX2,ZBTB40,DPF2,GATA1,STAT3,SMARCA4,ARID3A,FOS,MLLT1,NFE2,SMARCC2,CEBPB,MAFK,C11orf30,IRF1,ZNF639,ZNF316,GATAD2B,FOXA1,HDAC3,NFIC,MXI1,GATA3,ZBED1,REST,IRF1,CEBPB,RBFOX2,CHD4,STAT5A,KDM1A,HDAC2,ZNF24,TBX21,FOXM1,NCOA1,MTA2,ETV6,SMARCA5,ARID1B,SMARCA4,CHD1,PTBP1,CC2D1A,SIN3A,ZBTB33,ZMYM3,SMARCE1,RBM25,ZFX,CHAMP1,RBM39,TAF1,GATAD2B,ASH2L,CBX3,ZNF316,BCOR,HCFC1…	chr3	160164291	160170444	chr3	160167892
chr3	160167892	160168657	0.261128364389234	-0.20404470092702	0.785714285714286	0.50531914893617	0.538001820951407	0.74760438178161	37	1.087643399328e-09	chr3	160167618	160168618	Promoter	-	TRIM59	protein_coding	chr3	160167892	160168618	0.949019607843137	0.726	CpG: 85	chr3	160167184	160168200	chr3	160167892	160168200	*	*	*	*	*	0	0	chr3-160168480:160168950	chr3	160168480	160168950	chr3	160168480	160168618	ZBTB7A,NRF1,POLR2A,ZBTB33,MAX,MLLT1,RBFOX2,ZBTB40,DPF2,GATA1,STAT3,SMARCA4,ARID3A,FOS,MLLT1,NFE2,SMARCC2,CEBPB,MAFK,C11orf30,IRF1,ZNF639,ZNF316,GATAD2B,FOXA1,HDAC3,NFIC,MXI1,GATA3,ZBED1,REST,IRF1,CEBPB,RBFOX2,CHD4,STAT5A,KDM1A,HDAC2,ZNF24,TBX21,FOXM1,NCOA1,MTA2,ETV6,SMARCA5,ARID1B,SMARCA4,CHD1,PTBP1,CC2D1A,SIN3A,ZBTB33,ZMYM3,SMARCE1,RBM25,ZFX,CHAMP1,RBM39,TAF1,GATAD2B,ASH2L,CBX3,ZNF316,BCOR,HCFC1…	chr3	160164291	160170444	chr3	160167892
chr3	170533898	170540861	0.207750582750583	-0.356200243550515	0.853571428571428	0.608187134502924	0.510397191411603	0.854736935367224	87	4.61883392535456e-14	chr3	170425984	170577771	Intron3	+	CLDN11	protein_coding	chr3	170533898	170540861	1	0.0458734937774645	*	*	*	*	*	0	0	chr3:170537587-170537835	chr3	170537587	170537835	chr3	170537587	170537835	chr3-170535440:170535610	chr3	170535440	170535610	chr3	170535440	170535610	LEF1,NR2F1,IKZF1,MTA3,MTA2,TCF12,TAL1,CBFA2T2,NCOR1,NCOA2,CBFA2T3,ZBTB33	chr3	170539411	170540923	chr3	170539411
chr3	187184164	187189089	0.202898550724637	-0.196467361128282	0.80952380952381	0.567567567567568	0.635630198536173	0.834419444925215	58	1.87045066390751e-07	*	*	*	InterGenic	*	*	*	*	*	*	*	*	*	*	*	*	*	0	0	*	*	*	*	*	0	0	chr3-187187980:187188170	chr3	187187980	187188170	chr3	187187980	187188170	NR2F1	chr3	187187558	187188048	chr3	187187558
chr3	189831530	189832225	0.201680672268908	-0.359094383894946	0.869565217391304	0.660377358490566	0.443144667641655	0.790051373207513	44	2.62437918703385e-13	chr3	189713232	189839991	Intron1	-	LEPREL1	protein_coding	chr3	189831530	189832225	1	0.00548284539953771	*	*	*	*	*	0	0	*	*	*	*	*	0	0	*	*	*	*	*	0	0	*	*	*	*	*	0
chr3	195505611	195514901	0.386363636363636	0.147733839204131	0.615384615384615	0.209302325581395	0.732386574474716	0.584478128729595	202	1.75462378488313e-61	chr3	195505327	195505660	Intron2	-	MUC4	protein_coding	chr3	195505611	195505660	0.00527448869752422	0.147147147147147	*	*	*	*	*	0	0	*	*	*	*	*	0	0	*	*	*	*	*	0	0	*	*	*	*	*	0
chr3	195505611	195514901	0.386363636363636	0.147733839204131	0.615384615384615	0.209302325581395	0.732386574474716	0.584478128729595	202	1.75462378488313e-61	chr3	195505661	195518368	Exon2	-	MUC4	protein_coding	chr3	195505661	195514901	0.994617868675996	0.727158259227198	*	*	*	*	*	0	0	*	*	*	*	*	0	0	chr3-195511020:195511170	chr3	195511020	195511170	chr3	195511020	195511170	SUZ12,ZNF207,CREB1,NCOA3,HES1	chr3	195513387	195513901	chr3	195513387
chr3	195515029	195516614	0.354037267080745	-0.274814393663107	0.80952380952381	0.428571428571429	0.621275463363605	0.889164176865706	42	2.20103122856952e-12	chr3	195505661	195518368	Exon2	-	MUC4	protein_coding	chr3	195515029	195516614	1	0.124734398363107	*	*	*	*	*	0	0	*	*	*	*	*	0	0	chr3-195515325:195515475	chr3	195515325	195515475	chr3	195515325	195515475	CTCF,POLR2A,FOXA1,NFIC	chr3	195515970	195517106	chr3	195515970
chr3	197363421	197377268	0.210084033613445	-0.274205455037129	0.827586206896552	0.595238095238095	0.527599777509061	0.808758144360764	266	2.05977444133225e-35	chr3	197371539	197372539	Promoter	+	RP11-496H1.2	lincRNA	chr3	197371539	197372539	0.0722178089116776	1	*	*	*	*	*	0	0	*	*	*	*	*	0	0	*	*	*	*	*	0	0	*	*	*	*	*	0
chr3	197363421	197377268	0.210084033613445	-0.274205455037129	0.827586206896552	0.595238095238095	0.527599777509061	0.808758144360764	266	2.05977444133225e-35	chr3	197372540	197372888	FirstExon	+	RP11-496H1.2	lincRNA	chr3	197372540	197372888	0.0251317975012638	1	*	*	*	*	*	0	0	*	*	*	*	*	0	0	*	*	*	*	*	0	0	*	*	*	*	*	0
chr3	197824239	197832745	0.267948717948718	-0.493181174587834	0.941176470588235	0.676470588235294	0.242743002721138	0.777238050100981	277	5.44711722927821e-81	*	*	*	InterGenic	*	*	*	*	*	*	*	*	CpG: 61	chr3	197831806	197832760	chr3	197831806	197832745	*	*	*	*	*	0	0	chr3-197832620:197832830	chr3	197832620	197832830	chr3	197832620	197832745	ZBTB33,CHAMP1	chr3	197824693	197825215	chr3	197824693
chr4	1391021	1392650	0.225	-0.212519457639645	0.736842105263158	0.490909090909091	0.689964538812492	0.904475889872221	52	9.69810673522127e-09	*	*	*	InterGenic	*	*	*	*	*	*	*	*	*	*	*	*	*	0	0	*	*	*	*	*	0	0	chr4-1392540:1392575	chr4	1392540	1392575	chr4	1392540	1392575	POLR2G	chr4	1390847	1391143	chr4	1391021
chr4	1419441	1421128	0.344343369758971	0.233254757956855	0.521739130434783	0.161290322580645	0.802717083480286	0.58111003073375	57	8.05568036783244e-14	*	*	*	InterGenic	*	*	*	*	*	*	*	*	*	*	*	*	*	0	0	*	*	*	*	*	0	0	chr4-1419885:1420035	chr4	1419885	1420035	chr4	1419885	1420035	TCF12,CBFA2T3,CBFA2T2,EZH2	chr4	1420522	1421189	chr4	1420522
chr4	2409062	2412463	0.203296703296703	-0.390131371604847	0.904761904761905	0.690909090909091	0.41066059380038	0.834159767746501	76	2.40696461305703e-14	chr4	2355801	2420011	Intron1	-	ZFYVE28	protein_coding	chr4	2409062	2412463	1	0.0529668275969475	*	*	*	*	*	0	0	*	*	*	*	*	0	0	chr4-2408965:2409275	chr4	2408965	2409275	chr4	2409062	2409275	RAD21	chr4	2408997	2409237	chr4	2409062
chr4	7441946	7457522	0.201173020527859	-0.173308662239084	0.72	0.471143174250833	0.721892180958512	0.891305616289603	213	4.03634754732164e-22	chr4	7398083	7533256	Intron2	+	SORCS2	protein_coding	chr4	7441946	7457522	1	0.115230112522471	*	*	*	*	*	0	0	*	*	*	*	*	0	0	chr4-7442805:7442955	chr4	7442805	7442955	chr4	7442805	7442955	RBM39	chr4	7442142	7442818	chr4	7442142
chr4	23831348	23859342	0.257246376811594	0.10889051621234	0.515151515151515	0.22	0.762263399609037	0.611499600715753	200	5.80864425641968e-37	chr4	23831209	23833179	Intron2	-	PPARGC1A	protein_coding	chr4	23831348	23833179	0.065406872901336	0.929441624365482	*	*	*	*	*	0	0	*	*	*	*	*	0	0	*	*	*	*	*	0	0	HNRNPK	chr4	23831541	23832045	chr4	23831541
chr4	23831348	23859342	0.257246376811594	0.10889051621234	0.515151515151515	0.22	0.762263399609037	0.611499600715753	200	5.80864425641968e-37	chr4	23833180	23833374	Exon2	-	PPARGC1A	protein_coding	chr4	23833180	23833374	0.00693005644066586	1	*	*	*	*	*	0	0	*	*	*	*	*	0	0	*	*	*	*	*	0	0	SMARCA4	chr4	23833118	23833402	chr4	23833180
chr4	23831348	23859342	0.257246376811594	0.10889051621234	0.515151515151515	0.22	0.762263399609037	0.611499600715753	200	5.80864425641968e-37	chr4	23833375	23883543	Intron1	-	PPARGC1A	protein_coding	chr4	23833375	23859342	0.927591626777167	0.517600861106682	*	*	*	*	*	0	0	*	*	*	*	*	0	0	chr4-23835165:23835315	chr4	23835165	23835315	chr4	23835165	23835315	SMARCA4	chr4	23833118	23833402	chr4	23833375
chr4	23949666	23957130	0.230261083521953	0.0853179931363151	0.471428571428572	0.1875	0.704935048113111	0.566602763359793	49	1.17735308889062e-11	*	*	*	InterGenic	*	*	*	*	*	*	*	*	*	*	*	*	*	0	0	*	*	*	*	*	0	0	chr4-23949560:23949790	chr4	23949560	23949790	chr4	23949666	23949790	SMARCA4	chr4	23950891	23951175	chr4	23950891
chr4	35213557	35239580	0.205128205128205	-0.174898768314506	0.714285714285714	0.48780487804878	0.640642698295787	0.817612855954816	112	4.24411675427535e-12	*	*	*	InterGenic	*	*	*	*	*	*	*	*	*	*	*	*	*	0	0	*	*	*	*	*	0	0	chr4-35214765:35214990	chr4	35214765	35214990	chr4	35214765	35214990	SMARCA4	chr4	35218291	35218575	chr4	35218291
chr4	39813494	39817978	0.25	-0.299940100804903	0.857142857142857	0.584905660377358	0.534855710277185	0.881694283324195	74	2.05870619530233e-17	*	*	*	InterGenic	*	*	*	*	*	*	*	*	*	*	*	*	*	0	0	*	*	*	*	*	0	0	chr4-39813825:39814010	chr4	39813825	39814010	chr4	39813825	39814010	NFIC,BCOR,TRIM24,MLLT1,TRIP13,GATAD2A,E4F1,KDM1A,ZNF639,SRF,CDC5L,HDAC2,EGR1,CBFA2T3,TBX21,PHF20,ATF7,CHD4	chr4	39814046	39815046	chr4	39814046
chr4	49093260	49158633	0.75	0.61816247869394	0.758939974457216	0	0.666217515626056	0	1177	0	*	*	*	InterGenic	*	*	*	*	*	*	*	*	*	*	*	*	*	0	0	*	*	*	*	*	0	0	chr4-49093240:49093410	chr4	49093240	49093410	chr4	49093260	49093410	*	*	*	*	*	0
chr4	49633327	49659435	0.692307692307692	0.615187021945132	0.7	0	0.640642698295787	0	289	5.02633411245291e-104	*	*	*	InterGenic	*	*	*	*	*	*	*	*	*	*	*	*	*	0	0	*	*	*	*	*	0	0	chr4-49649760:49650010	chr4	49649760	49650010	chr4	49649760	49650010	*	*	*	*	*	0
chr4	53617075	53617991	0.220647773279352	-0.186583584323942	0.758620689655172	0.538461538461538	0.526299300995826	0.724062648289072	82	2.62341307254233e-26	chr4	53588912	53617096	Intron2	-	ERVMER34-1	protein_coding	chr4	53617075	53617096	0.0229257641921397	0.000745103604882203	*	*	*	*	*	0	0	*	*	*	*	*	0	0	chr4-53616920:53617975	chr4	53616920	53617975	chr4	53617075	53617096	CEBPB,RNF2,MGA,MAX,MYC,E2F6,USF1,L3MBTL2,EZH2,KDM4A,CTCF,ZFX,SUZ12,ASH2L,RBBP5,SIN3A,POLR2A,TAF1,TBP,ZNF444,SP1,HNRNPLL,E2F6,ZEB1,KDM1A,MYC,ZNF592,ZNF687	chr4	53616439	53618207	chr4	53617075
chr4	53617075	53617991	0.220647773279352	-0.186583584323942	0.758620689655172	0.538461538461538	0.526299300995826	0.724062648289072	82	2.62341307254233e-26	chr4	53617097	53617236	Exon2	-	ERVMER34-1	protein_coding	chr4	53617097	53617236	0.15174672489083	1	CpG: 54	chr4	53617118	53617607	chr4	53617118	53617236	*	*	*	*	*	0	0	chr4-53616920:53617975	chr4	53616920	53617975	chr4	53617097	53617236	CEBPB,RNF2,MGA,MAX,MYC,E2F6,USF1,L3MBTL2,EZH2,KDM4A,CTCF,ZFX,SUZ12,ASH2L,RBBP5,SIN3A,POLR2A,TAF1,TBP,ZNF444,SP1,HNRNPLL,E2F6,ZEB1,KDM1A,MYC,ZNF592,ZNF687	chr4	53616439	53618207	chr4	53617097
chr4	53617075	53617991	0.220647773279352	-0.186583584323942	0.758620689655172	0.538461538461538	0.526299300995826	0.724062648289072	82	2.62341307254233e-26	chr4	53617237	53617509	Intron1	-	ERVMER34-1	protein_coding	chr4	53617237	53617509	0.296943231441048	1	CpG: 54	chr4	53617118	53617607	chr4	53617237	53617509	*	*	*	*	*	0	0	chr4-53616920:53617975	chr4	53616920	53617975	chr4	53617237	53617509	CEBPB,RNF2,MGA,MAX,MYC,E2F6,USF1,L3MBTL2,EZH2,KDM4A,CTCF,ZFX,SUZ12,ASH2L,RBBP5,SIN3A,POLR2A,TAF1,TBP,ZNF444,SP1,HNRNPLL,E2F6,ZEB1,KDM1A,MYC,ZNF592,ZNF687	chr4	53616439	53618207	chr4	53617237
chr4	53617075	53617991	0.220647773279352	-0.186583584323942	0.758620689655172	0.538461538461538	0.526299300995826	0.724062648289072	82	2.62341307254233e-26	chr4	53617510	53617753	FirstExon	-	ERVMER34-1	protein_coding	chr4	53617510	53617753	0.26528384279476	1	CpG: 54	chr4	53617118	53617607	chr4	53617510	53617607	*	*	*	*	*	0	0	chr4-53616920:53617975	chr4	53616920	53617975	chr4	53617510	53617753	CEBPB,RNF2,MGA,MAX,MYC,E2F6,USF1,L3MBTL2,EZH2,KDM4A,CTCF,ZFX,SUZ12,ASH2L,RBBP5,SIN3A,POLR2A,TAF1,TBP,ZNF444,SP1,HNRNPLL,E2F6,ZEB1,KDM1A,MYC,ZNF592,ZNF687	chr4	53616439	53618207	chr4	53617510
chr4	53617075	53617991	0.220647773279352	-0.186583584323942	0.758620689655172	0.538461538461538	0.526299300995826	0.724062648289072	82	2.62341307254233e-26	chr4	53617754	53618754	Promoter	-	ERVMER34-1	protein_coding	chr4	53617754	53617991	0.258733624454148	0.237	*	*	*	*	*	0	0	*	*	*	*	*	0	0	chr4-53616920:53617975	chr4	53616920	53617975	chr4	53617754	53617975	CEBPB,RNF2,MGA,MAX,MYC,E2F6,USF1,L3MBTL2,EZH2,KDM4A,CTCF,ZFX,SUZ12,ASH2L,RBBP5,SIN3A,POLR2A,TAF1,TBP,ZNF444,SP1,HNRNPLL,E2F6,ZEB1,KDM1A,MYC,ZNF592,ZNF687	chr4	53616439	53618207	chr4	53617754
chr4	68565386	68566267	0.217758985200845	0.001294878276909	0.6	0.348837209302326	0.716418465722833	0.739158109225527	26	0.000760461827658865	chr4	68562426	68566766	Intron1	-	UBA6	protein_coding	chr4	68565386	68566267	1	0.202995391705069	*	*	*	*	*	0	0	*	*	*	*	*	0	0	chr4-68565625:68565775	chr4	68565625	68565775	chr4	68565625	68565775	RBBP5,BCOR,MLLT1,ZBTB40,YY1,PRPF4,ZBTB33,TCF7,BRD9,ARID3A,SIN3A,TEAD4,TBX21,ATF7,IRF2,TBP,SKIL,E2F4,EP300,PKNOX1,RB1,CUX1,ATF2,IRF1,IKZF1,XRCC5,DPF2,STAT3,SAP30,IKZF2,CTCF,BRD4,AGO1,RBFOX2,ZFX,HDAC1,CLOCK,RBBP5,HNRNPLL,POLR2A,AGO2,RBM39,TAF1,SMARCA5,NRF1,KDM4A,HNRNPK,ASH2L,GATAD2B,HDAC2,PTBP1,PHF8,POLR2G,PRDM10,MTA3,GMEB1,BACH1,SMC3,GATAD2A,SMARCA4,SAFB,SIN3B,RB1,MNT,KDM5B,ARID1B,YY1,CBX1,NR2F1,G…	chr4	68565195	68568803	chr4	68565386
chr4	68565386	68566267	0.217758985200845	0.001294878276909	0.6	0.348837209302326	0.716418465722833	0.739158109225527	26	0.000760461827658865	chr4	68566078	68567078	Promoter	+	UBA6-AS1	antisense	chr4	68566078	68566267	0.214528944381385	0.189	*	*	*	*	*	0	0	*	*	*	*	*	0	0	chr4-68565800:68566110	chr4	68565800	68566110	chr4	68566078	68566110	RBBP5,BCOR,MLLT1,ZBTB40,YY1,PRPF4,ZBTB33,TCF7,BRD9,ARID3A,SIN3A,TEAD4,TBX21,ATF7,IRF2,TBP,SKIL,E2F4,EP300,PKNOX1,RB1,CUX1,ATF2,IRF1,IKZF1,XRCC5,DPF2,STAT3,SAP30,IKZF2,CTCF,BRD4,AGO1,RBFOX2,ZFX,HDAC1,CLOCK,RBBP5,HNRNPLL,POLR2A,AGO2,RBM39,TAF1,SMARCA5,NRF1,KDM4A,HNRNPK,ASH2L,GATAD2B,HDAC2,PTBP1,PHF8,POLR2G,PRDM10,MTA3,GMEB1,BACH1,SMC3,GATAD2A,SMARCA4,SAFB,SIN3B,RB1,MNT,KDM5B,ARID1B,YY1,CBX1,NR2F1,G…	chr4	68565195	68568803	chr4	68566078
chr4	89617050	89621569	0.260101010101011	-0.403022082245376	0.91304347826087	0.636363636363636	0.3846719243576	0.832068616032183	98	1.29189373366762e-28	chr4	89608451	89625248	Intron23	+	HERC3	protein_coding	chr4	89617050	89621569	1	0.269036137405489	*	*	*	*	*	0	0	*	*	*	*	*	0	0	chr4-89617880:89618250	chr4	89617880	89618250	chr4	89617880	89618250	MEIS2	chr4	89617656	89618032	chr4	89617656
chr4	89617050	89621569	0.260101010101011	-0.403022082245376	0.91304347826087	0.636363636363636	0.3846719243576	0.832068616032183	98	1.29189373366762e-28	chr4	89617066	89619386	FirstExon	-	NAP1L5	protein_coding	chr4	89617066	89619386	0.513387917680903	1	*	*	*	*	*	0	0	*	*	*	*	*	0	0	chr4-89617880:89618250	chr4	89617880	89618250	chr4	89617880	89618250	MEIS2	chr4	89617656	89618032	chr4	89617656
chr4	89617050	89621569	0.260101010101011	-0.403022082245376	0.91304347826087	0.636363636363636	0.3846719243576	0.832068616032183	98	1.29189373366762e-28	chr4	89619387	89620387	Promoter	-	NAP1L5	protein_coding	chr4	89619387	89620387	0.221287895552113	1	*	*	*	*	*	0	0	*	*	*	*	*	0	0	chr4-89619485:89619970	chr4	89619485	89619970	chr4	89619485	89619970	CREB1,EGR1,SUZ12,NFXL1,GATA1,EP400,IKZF1,GATA2,NRF1,SIN3A,MXI1,HNRNPLL,CTCF,YY1,POLR2A,KDM4A,ASH2L,RBFOX2,NR2F1,PHF8,CTBP1,GABPB1,POLR2G,EP300,RUNX3,CREB1,PKNOX1,SP1,RAD51,RBBP5,NCOA1,ZBTB33,NFYB,REST,E2F1,MAX,TFAP4,MYC,USF2,CREM,USF1	chr4	89618194	89619596	chr4	89619387
chr4	109662731	109662987	-0.205247281098674	0.212005171464277	0.633333333333334	0.921052631578947	0.818550060193181	0.590396446597766	5	0.309424060364659	*	*	*	InterGenic	*	*	*	*	*	*	*	*	*	*	*	*	*	0	0	*	*	*	*	*	0	0	chr4-109662925:109663175	chr4	109662925	109663175	chr4	109662925	109662987	*	*	*	*	*	0
chr4	128432197	128438524	0.264389233954451	-0.338686229453351	0.866666666666667	0.619047619047619	0.477485416947116	0.839197746264437	83	5.26035868036539e-18	*	*	*	InterGenic	*	*	*	*	*	*	*	*	*	*	*	*	*	0	0	*	*	*	*	*	0	0	chr4-128436600:128436750	chr4	128436600	128436750	chr4	128436600	128436750	RNF2,LEF1,ARNT,ATF7,KDM1A,NFATC3,NFIC,NR2C1,E4F1,ESRRA,MTA3,NCOR1,ZNF24,ZNF282,DPF2,TRIM24,NCOA1,NBN,FOXM1,SOX6,ARID1B,MTA1,HDAC2,ZSCAN29,BCOR,CBFA2T3,EHMT2,MEIS2,TRIM28,IKZF1,CC2D1A,SMARCA4,TCF12,TAL1,SMARCE1,NR2F1,CTBP1,ZNF184,HDAC1,ZEB2,CBFA2T2	chr4	128436294	128437086	chr4	128436294
chr4	157025231	157032510	0.217391304347826	-0.325981597041933	0.846153846153846	0.6	0.520426041486377	0.857852420758395	82	7.20728008038554e-14	*	*	*	InterGenic	*	*	*	*	*	*	*	*	*	*	*	*	*	0	0	*	*	*	*	*	0	0	chr4-157031785:157032030	chr4	157031785	157032030	chr4	157031785	157032030	CTCF,MYC,CEBPB,STAT3,FOS,RAD21,POLR2A,NR2F2,GATA1,MYC,STAT3,FOS	chr4	157030818	157032427	chr4	157030818
chr4	158436143	158436425	-0.262987012987013	-0.153814157309477	0.272727272727273	0.535714285714286	0.694987500240385	0.85257592624644	8	0.0250261609245482	*	*	*	InterGenic	*	*	*	*	*	*	*	*	*	*	*	*	*	0	0	*	*	*	*	*	0	0	chr4-158435940:158436215	chr4	158435940	158436215	chr4	158436143	158436215	CTCF,RAD21,YY1,ZNF143,ZBTB7A,SMC3,USF1	chr4	158435718	158436624	chr4	158436143
chr4	179874343	179879239	0.269736842105263	-0.356752248315424	0.875	0.578947368421053	0.462091364631989	0.839370328764539	60	1.62896811603266e-12	*	*	*	InterGenic	*	*	*	*	*	*	*	*	*	*	*	*	*	0	0	*	*	*	*	*	0	0	*	*	*	*	*	0	0	HNRNPL	chr4	179874541	179875037	chr4	179874541
chr4	183728200	183750940	0.206196396898484	-0.325409479236623	0.875	0.631578947368421	0.478183046665067	0.851381653349224	471	1.78886249871547e-75	*	*	*	InterGenic	*	*	*	*	*	*	*	*	CpG: 24	chr4	183729059	183729344	chr4	183729059	183729344	chr4:183730445-183730610	chr4	183730445	183730610	chr4	183730445	183730610	chr4-183750405:183750555	chr4	183750405	183750555	chr4	183750405	183750555	CREB1	chr4	183750867	183751257	chr4	183750867
chr4	183750956	183757855	0.462445887445887	-0.13844173662126	0.80625	0.333333333333333	0.629829935790631	0.763040940553165	63	3.6870896810539e-17	*	*	*	InterGenic	*	*	*	*	*	*	*	*	*	*	*	*	*	0	0	*	*	*	*	*	0	0	chr4-183757505:183757750	chr4	183757505	183757750	chr4	183757505	183757750	CTCF,ZNF143,RAD21,MAX	chr4	183756109	183756884	chr4	183756109
chr4	185885341	185889011	0.347222222222222	-0.373678444278071	0.857142857142857	0.5	0.500538157270061	0.889209549809781	200	4.36479752973196e-62	*	*	*	InterGenic	*	*	*	*	*	*	*	*	*	*	*	*	*	0	0	*	*	*	*	*	0	0	chr4-185888920:185889170	chr4	185888920	185889170	chr4	185888920	185889011	RELB,IKZF1,IKZF2,ATF2,ATF7	chr4	185888666	185889668	chr4	185888666
chr4	186977374	186980706	0.319418277494503	-0.411817178000764	0.888888888888889	0.542857142857143	0.432153211636133	0.868850589673392	87	2.7588535609514e-27	*	*	*	InterGenic	*	*	*	*	*	*	*	*	*	*	*	*	*	0	0	*	*	*	*	*	0	0	chr4-186979805:186980155	chr4	186979805	186980155	chr4	186979805	186980155	MTA2,ARNT,NR2F1,REST,IKZF1,IKZF2,BHLHE40,SPI1,MEF2B,BCL3,PAX5,POU2F2,BCL11A,EBF1,RUNX3,BATF,MAFK,MAFF,ZNF316,C11orf30	chr4	186979699	186980447	chr4	186979699
chr4	187351232	187357217	0.384643817204301	-0.264008633388547	0.802777777777778	0.393398268398269	0.577900199475139	0.847468613870581	225	6.51770707698162e-69	chr4	187212187	187421998	Intron1	-	F11-AS1	antisense	chr4	187351232	187357217	1	0.0285256731057952	CpG: 18	chr4	187356976	187357233	chr4	187356976	187357217	*	*	*	*	*	0	0	chr4-187356940:187357355	chr4	187356940	187357355	chr4	187356940	187357217	*	*	*	*	*	0
chr4	187351232	187357217	0.384643817204301	-0.264008633388547	0.802777777777778	0.393398268398269	0.577900199475139	0.847468613870581	225	6.51770707698162e-69	chr4	187348253	187476335	Intron1	-	RP11-215A19.2	protein_coding	chr4	187351232	187357217	1	0.0467278774535063	CpG: 18	chr4	187356976	187357233	chr4	187356976	187357217	*	*	*	*	*	0	0	chr4-187356940:187357355	chr4	187356940	187357355	chr4	187356940	187357217	*	*	*	*	*	0
chr4	187357231	187366068	0.221153846153846	-0.0115213996711481	0.64	0.352941176470588	0.777638187993133	0.840479945099093	84	3.58923325188921e-08	chr4	187212187	187421998	Intron1	-	F11-AS1	antisense	chr4	187357231	187366068	1	0.0421188593543713	CpG: 18	chr4	187356976	187357233	chr4	187357231	187357233	*	*	*	*	*	0	0	chr4-187364385:187364535	chr4	187364385	187364535	chr4	187364385	187364535	CTCF,FOXA1	chr4	187365729	187366755	chr4	187365729
chr4	187357231	187366068	0.221153846153846	-0.0115213996711481	0.64	0.352941176470588	0.777638187993133	0.840479945099093	84	3.58923325188921e-08	chr4	187348253	187476335	Intron1	-	RP11-215A19.2	protein_coding	chr4	187357231	187366068	1	0.0689948626661045	CpG: 18	chr4	187356976	187357233	chr4	187357231	187357233	*	*	*	*	*	0	0	chr4-187364385:187364535	chr4	187364385	187364535	chr4	187364385	187364535	CTCF,FOXA1	chr4	187365729	187366755	chr4	187365729
chr4	189055306	189079675	0.208494208494208	-0.271617873336339	0.8125	0.567567567567568	0.598245572601161	0.884484640233522	366	1.89553559015694e-61	chr4	189059572	189060572	Promoter	+	TRIML1	protein_coding	chr4	189059572	189060572	0.0410357421313964	1	*	*	*	*	*	0	0	*	*	*	*	*	0	0	chr4-189060480:189060755	chr4	189060480	189060755	chr4	189060480	189060572	SMARCA4	chr4	189059859	189060143	chr4	189059859
chr4	189055306	189079675	0.208494208494208	-0.271617873336339	0.8125	0.567567567567568	0.598245572601161	0.884484640233522	366	1.89553559015694e-61	chr4	189060573	189061120	FirstExon	+	TRIML1	protein_coding	chr4	189060573	189061120	0.0224465509458739	1	*	*	*	*	*	0	0	*	*	*	*	*	0	0	chr4-189060905:189061270	chr4	189060905	189061270	chr4	189060905	189061120	*	*	*	*	*	0
chr4	189055306	189079675	0.208494208494208	-0.271617873336339	0.8125	0.567567567567568	0.598245572601161	0.884484640233522	366	1.89553559015694e-61	chr4	189061121	189061681	Intron1	+	TRIML1	protein_coding	chr4	189061121	189061681	0.022980015593582	1	*	*	*	*	*	0	0	*	*	*	*	*	0	0	chr4-189061640:189062075	chr4	189061640	189062075	chr4	189061640	189061681	*	*	*	*	*	0
chr4	189055306	189079675	0.208494208494208	-0.271617873336339	0.8125	0.567567567567568	0.598245572601161	0.884484640233522	366	1.89553559015694e-61	chr4	189061682	189061777	Exon2	+	TRIML1	protein_coding	chr4	189061682	189061777	0.00389839550248266	1	*	*	*	*	*	0	0	*	*	*	*	*	0	0	chr4-189061640:189062075	chr4	189061640	189062075	chr4	189061682	189061777	*	*	*	*	*	0
chr4	189055306	189079675	0.208494208494208	-0.271617873336339	0.8125	0.567567567567568	0.598245572601161	0.884484640233522	366	1.89553559015694e-61	chr4	189061778	189063405	Intron2	+	TRIML1	protein_coding	chr4	189061778	189063405	0.066765152447782	1	*	*	*	*	*	0	0	*	*	*	*	*	0	0	chr4-189063400:189063610	chr4	189063400	189063610	chr4	189063400	189063405	NR2F2	chr4	189063252	189063742	chr4	189063252
chr4	189055306	189079675	0.208494208494208	-0.271617873336339	0.8125	0.567567567567568	0.598245572601161	0.884484640233522	366	1.89553559015694e-61	chr4	189063406	189063636	Exon3	+	TRIML1	protein_coding	chr4	189063406	189063636	0.00943822069022118	1	*	*	*	*	*	0	0	*	*	*	*	*	0	0	chr4-189063625:189063915	chr4	189063625	189063915	chr4	189063625	189063636	NR2F2	chr4	189063252	189063742	chr4	189063406
chr4	189055306	189079675	0.208494208494208	-0.271617873336339	0.8125	0.567567567567568	0.598245572601161	0.884484640233522	366	1.89553559015694e-61	chr4	189063637	189064991	Intron3	+	TRIML1	protein_coding	chr4	189063637	189064991	0.0555623948459108	1	*	*	*	*	*	0	0	*	*	*	*	*	0	0	chr4-189064985:189065215	chr4	189064985	189065215	chr4	189064985	189064991	REST	chr4	189064817	189065321	chr4	189064817
chr4	189055306	189079675	0.208494208494208	-0.271617873336339	0.8125	0.567567567567568	0.598245572601161	0.884484640233522	366	1.89553559015694e-61	chr4	189064992	189065014	Exon4	+	TRIML1	protein_coding	chr4	189064992	189065014	0.000902786326890722	1	*	*	*	*	*	0	0	*	*	*	*	*	0	0	chr4-189064985:189065215	chr4	189064985	189065215	chr4	189064992	189065014	REST	chr4	189064817	189065321	chr4	189064992
chr4	189055306	189079675	0.208494208494208	-0.271617873336339	0.8125	0.567567567567568	0.598245572601161	0.884484640233522	366	1.89553559015694e-61	chr4	189065015	189065189	Intron4	+	TRIML1	protein_coding	chr4	189065015	189065189	0.00714021913086298	1	*	*	*	*	*	0	0	*	*	*	*	*	0	0	chr4-189064985:189065215	chr4	189064985	189065215	chr4	189065015	189065189	REST	chr4	189064817	189065321	chr4	189065015
chr4	189055306	189079675	0.208494208494208	-0.271617873336339	0.8125	0.567567567567568	0.598245572601161	0.884484640233522	366	1.89553559015694e-61	chr4	189065190	189065287	Exon5	+	TRIML1	protein_coding	chr4	189065190	189065287	0.00398046698674546	1	*	*	*	*	*	0	0	*	*	*	*	*	0	0	chr4-189065225:189065435	chr4	189065225	189065435	chr4	189065225	189065287	REST	chr4	189064817	189065321	chr4	189065190
chr4	189055306	189079675	0.208494208494208	-0.271617873336339	0.8125	0.567567567567568	0.598245572601161	0.884484640233522	366	1.89553559015694e-61	chr4	189065288	189067975	Intron5	+	TRIML1	protein_coding	chr4	189065288	189067975	0.110263039107062	1	*	*	*	*	*	0	0	*	*	*	*	*	0	0	chr4-189067845:189068035	chr4	189067845	189068035	chr4	189067845	189067975	REST	chr4	189065998	189066170	chr4	189065998
chr4	189055306	189079675	0.208494208494208	-0.271617873336339	0.8125	0.567567567567568	0.598245572601161	0.884484640233522	366	1.89553559015694e-61	chr4	189067976	189068776	LastExon	+	TRIML1	protein_coding	chr4	189067976	189068776	0.0328285937051172	1	*	*	*	*	*	0	0	*	*	*	*	*	0	0	chr4-189068505:189068775	chr4	189068505	189068775	chr4	189068505	189068775	*	*	*	*	*	0
chr4	189055306	189079675	0.208494208494208	-0.271617873336339	0.8125	0.567567567567568	0.598245572601161	0.884484640233522	366	1.89553559015694e-61	chr4	189061976	189062028	LastExon	-	RP11-366H4.3	antisense	chr4	189061976	189062028	0.00213385859083262	1	*	*	*	*	*	0	0	*	*	*	*	*	0	0	chr4-189061640:189062075	chr4	189061640	189062075	chr4	189061976	189062028	*	*	*	*	*	0
chr4	189055306	189079675	0.208494208494208	-0.271617873336339	0.8125	0.567567567567568	0.598245572601161	0.884484640233522	366	1.89553559015694e-61	chr4	189062029	189064081	Intron1	-	RP11-366H4.3	antisense	chr4	189062029	189064081	0.0842053428536255	1	*	*	*	*	*	0	0	*	*	*	*	*	0	0	chr4-189063985:189064135	chr4	189063985	189064135	chr4	189063985	189064081	NR2F2	chr4	189063252	189063742	chr4	189063252
chr4	189055306	189079675	0.208494208494208	-0.271617873336339	0.8125	0.567567567567568	0.598245572601161	0.884484640233522	366	1.89553559015694e-61	chr4	189064082	189064533	FirstExon	-	RP11-366H4.3	antisense	chr4	189064082	189064533	0.0185071197012598	1	*	*	*	*	*	0	0	*	*	*	*	*	0	0	chr4-189064485:189064635	chr4	189064485	189064635	chr4	189064485	189064533	*	*	*	*	*	0
chr4	189055306	189079675	0.208494208494208	-0.271617873336339	0.8125	0.567567567567568	0.598245572601161	0.884484640233522	366	1.89553559015694e-61	chr4	189064534	189065534	Promoter	-	RP11-366H4.3	antisense	chr4	189064534	189065534	0.0410357421313964	1	*	*	*	*	*	0	0	*	*	*	*	*	0	0	chr4-189065225:189065435	chr4	189065225	189065435	chr4	189065225	189065435	REST	chr4	189064817	189065321	chr4	189064817
chr4	189149890	189155487	0.216903609598709	-0.193364608766661	0.764705882352941	0.533333333333333	0.636728386664897	0.844781381191041	81	2.27039974389906e-12	*	*	*	InterGenic	*	*	*	*	*	*	*	*	*	*	*	*	*	0	0	*	*	*	*	*	0	0	chr4-189154605:189154835	chr4	189154605	189154835	chr4	189154605	189154835	GATAD2B,ZBTB40,ARHGAP35,MCM2	chr4	189152557	189153060	chr4	189152557
chr4	190763724	190768330	0.246503496503496	-0.219514561421887	0.774193548387097	0.476190476190476	0.686271296777067	0.905815749709097	144	1.91842924638493e-27	chr4	190742820	190785747	Intron2	-	AF146191.4	lincRNA	chr4	190763724	190768330	1	0.107298436881217	CpG: 25	chr4	190768033	190768332	chr4	190768033	190768330	*	*	*	*	*	0	0	chr4-190767640:190767815	chr4	190767640	190767815	chr4	190767640	190767815	FOS,ZNF316,PKNOX1,JUND,MEIS2	chr4	190766583	190767082	chr4	190766583
chr4	190802271	190803022	0.261859582542694	-0.39011769665436	0.842105263157895	0.608695652173913	0.504728652545985	0.864705963877062	22	1.54797105325297e-06	chr4	190785942	190838246	Intron1	-	AF146191.4	lincRNA	chr4	190802271	190803022	1	0.0143583664729275	*	*	*	*	*	0	0	*	*	*	*	*	0	0	chr4-190802945:190803215	chr4	190802945	190803215	chr4	190802945	190803022	*	*	*	*	*	0
chr4	190802271	190803022	0.261859582542694	-0.39011769665436	0.842105263157895	0.608695652173913	0.504728652545985	0.864705963877062	22	1.54797105325297e-06	chr4	190801669	190802669	Promoter	+	RP11-463J17.1	lincRNA	chr4	190802271	190802669	0.529960053262317	0.398	*	*	*	*	*	0	0	*	*	*	*	*	0	0	chr4-190802600:190802750	chr4	190802600	190802750	chr4	190802600	190802669	*	*	*	*	*	0
chr4	190802271	190803022	0.261859582542694	-0.39011769665436	0.842105263157895	0.608695652173913	0.504728652545985	0.864705963877062	22	1.54797105325297e-06	chr4	190802670	190803052	FirstExon	+	RP11-463J17.1	lincRNA	chr4	190802670	190803022	0.468708388814913	0.921465968586387	*	*	*	*	*	0	0	*	*	*	*	*	0	0	chr4-190802945:190803215	chr4	190802945	190803215	chr4	190802945	190803022	*	*	*	*	*	0
chr5	11822	13117	0.223880597014925	-0.411888307179871	0.909090909090909	0.696969696969697	0.331130909670121	0.764524124835427	170	5.57428211552381e-43	*	*	*	InterGenic	*	*	*	*	*	*	*	*	*	*	*	*	*	0	0	*	*	*	*	*	0	0	chr5-11785:11955	chr5	11785	11955	chr5	11822	11955	POLR2A,MEF2B,GABPB1,NFATC3,NR2F1,GATA3,CTCF,ARNT,AFF1,ZBTB33,BMI1,ZBTB2,FOXK2,ZNF143,ZSCAN29,ZNF687,ZEB2,ZNF639,BCOR,EP400,NCOR1,SMARCA5,ASH1L,FOXM1,MTA2,ZNF407,MCM7,TCF12,MNT,EGR1,GATAD2A,TRIM22,NCOA2,PHF20,NBN,NFIB,RAD51,SMAD1,NCOA1,E2F8,ZNF24,E4F1,PHB2,E2F7,CDC5L,NEUROD1,RCOR1,FOXA1,DPF2,ZBTB40,TRIP13,CHAMP1,HDAC2,NFXL1,ZNF512B,MLLT1,IKZF1,HES1,DNMT1,ZNF280A,MCM5,NCOA3,SUZ12,PHF21A,MTA3,ARID2,…	chr5	11277	12321	chr5	11822
chr5	83458	85996	0.263157894736842	-0.276320177566472	0.806451612903226	0.55	0.593302572069148	0.87233827041748	178	3.68502182958378e-52	*	*	*	InterGenic	*	*	*	*	*	*	*	*	CpG: 167	chr5	83428	85530	chr5	83458	85530	*	*	*	*	*	0	0	chr5-85605:86115	chr5	85605	86115	chr5	85605	85996	ZNF687,FOXA1,SIN3A,DPF2	chr5	85553	86195	chr5	85553
chr5	279628	286396	0.209302325581395	-0.383791496664667	0.888888888888889	0.666666666666667	0.417209722462608	0.853342978704074	130	9.49609718497819e-30	chr5	272888	304291	Intron2	+	PDCD6	protein_coding	chr5	279628	286396	1	0.215520810113683	*	*	*	*	*	0	0	*	*	*	*	*	0	0	chr5-285240:285390	chr5	285240	285390	chr5	285240	285390	MTA3,POLR2A	chr5	280713	281053	chr5	280713
chr5	629179	633657	0.241508491508492	-0.508204174411434	0.935416666666667	0.706599713055954	0.257742782841639	0.787576226733067	75	4.44785666820273e-25	chr5	624695	633883	Intron4	+	CEP72	protein_coding	chr5	629179	633657	1	0.487374836743579	*	*	*	*	*	0	0	*	*	*	*	*	0	0	chr5-629145:629410	chr5	629145	629410	chr5	629179	629410	CREB1	chr5	629125	629535	chr5	629179
chr5	852626	856096	0.238196555217832	-0.217461669899982	0.75	0.518012422360248	0.708534413202198	0.920236590820526	151	7.3085810395083e-32	*	*	*	InterGenic	*	*	*	*	*	*	*	*	*	*	*	*	*	0	0	*	*	*	*	*	0	0	chr5-853565:853715	chr5	853565	853715	chr5	853565	853715	SAFB,AGO1	chr5	852874	853599	chr5	852874
chr5	1041185	1047563	0.296181630546956	0.102132916733351	0.468627450980392	0.186773255813953	0.732386574474716	0.675172200729259	103	5.66660541820912e-20	*	*	*	InterGenic	*	*	*	*	*	*	*	*	*	*	*	*	*	0	0	chr5:1041596-1043550	chr5	1041596	1043550	chr5	1041596	1043550	chr5-1041245:1041395	chr5	1041245	1041395	chr5	1041245	1041395	ZNF24,ZNF8,ZBTB33,NFATC1,MLLT1,BMI1,NFIB,NBN,CREB1,FOXK2,BCL3,ZNF512B,IKZF1,TRIM22,HES1,CTBP1,ZNF592,GATAD2B,TBX3,CTCF,FOXP1,ZKSCAN1,POU2F2,ESRRA,ZBTB1,GATAD2B	chr5	1041101	1042676	chr5	1041185
chr5	1189053	1190742	0.25438596491228	-0.286773220050969	0.846153846153846	0.588235294117647	0.598696186532612	0.914465786444569	44	2.50536577493178e-11	*	*	*	InterGenic	*	*	*	*	*	*	*	*	*	*	*	*	*	0	0	*	*	*	*	*	0	0	chr5-1189225:1189655	chr5	1189225	1189655	chr5	1189225	1189655	ZBTB33	chr5	1190094	1190550	chr5	1190094
chr5	1190769	1194507	0.213414898412038	0.139363430610784	0.362781954887218	0.175735294117647	0.723650198151556	0.587382598596583	73	3.18447928822656e-09	*	*	*	InterGenic	*	*	*	*	*	*	*	*	CpG: 23	chr5	1193723	1193983	chr5	1193723	1193983	*	*	*	*	*	0	0	chr5-1190705:1190855	chr5	1190705	1190855	chr5	1190769	1190855	HDAC1,RNF2,L3MBTL2,HDAC2,ARID1B,ELF1,DPF2,ELF4,NRF1,NFATC3,SMARCE1,CUX1,MAX,FOXK2,GABPB1,EP300,SPI1,CREM,PKNOX1,CREM	chr5	1190752	1191896	chr5	1190769
chr5	19888364	19904719	0.223809523809524	-0.075016092026725	0.571428571428571	0.333333333333333	0.709361759630465	0.762142770330941	84	1.0017935606041e-07	chr5	19839352	19981168	Intron4	-	CDH18	protein_coding	chr5	19888364	19904719	1	0.115325492187059	*	*	*	*	*	0	0	*	*	*	*	*	0	0	chr5-19890220:19890370	chr5	19890220	19890370	chr5	19890220	19890370	GATA3,GATA2,ZNF217,TCF7L2,MBD2,MTA1,JUND,NEUROD1,FOS,SMARCE1,FOXA1,NFIB,DPF2,CTBP1	chr5	19891456	19892310	chr5	19891456
chr5	43066887	43067441	0.286666666666667	0.100170830574005	0.49	0.203448275862069	0.637082798744572	0.490896980769426	33	1.0221677219686e-11	*	*	*	InterGenic	*	*	*	*	*	*	*	*	CpG: 66	chr5	43066398	43067011	chr5	43066887	43067011	*	*	*	*	*	0	0	chr5-43066240:43067255	chr5	43066240	43067255	chr5	43066887	43067255	ZNF24,NFATC3,POLR2G,ZBTB33,POLR2A,PHF8,CTBP1,HDAC1,RLF,GATAD2A,TAF1,CDC5L,L3MBTL2,MAFK,NRF1,ZNF592,SP1,MGA,NR3C1,FOSL2,NR2F6,JUND,E2F6,NFE2,FOXA1,MAX,ARNT,ARID2,BCOR,EGR1,ZBTB5,YY1,CC2D1A,PHB2,SMARCA5,MIER1,POLR2A,BRD4,STAT5A,MLLT1,NFRKB,SUZ12,ZNF280A,ZNF639,ZNF24,DPF2,SMARCA4,ZBTB40,SIN3A,NR2F6,CLOCK,ASH2L,CTCF,POLR2G,EP300,NRF1,RBFOX2,TBL1XR1,SMARCC2,CREB3L1,TRIM28,NFATC3,KDM4B,RNF2,L3MBTL2,PKN…	chr5	43063348	43070278	chr5	43066887
chr5	43603571	43604376	0.257033248081842	0.132538261490151	0.478260869565217	0.241379310344828	0.625105205873244	0.473011758112955	42	9.72682336264823e-13	chr5	43603207	43604207	Promoter	-	NNT-AS1	antisense	chr5	43603571	43604207	0.790062111801242	0.636	CpG: 67	chr5	43602977	43603650	chr5	43603571	43603650	*	*	*	*	*	0	0	chr5-43602485:43603935	chr5	43602485	43603935	chr5	43603571	43603935	KAT8,NFYB,CTCF,RAD21,MLLT1,KDM4B,EP400,ZBTB40,C11orf30,SMARCB1,NR3C1,FOXA1,ATF3,ZNF316,BRD9,CEBPB,SKIL,BRD4,ARID1B,AFF1,MTA2,PKNOX1,ZSCAN29,E4F1,NFIC,GABPB1,TRIM28,ZNF687,REST,POLR2A,ETV4,SP1,NFRKB,NR2F1,TBX21,RUNX3,RAD21,ELF4,RAD51,SIN3A,ZNF592,HNF4A,NR2F6,TAF1,IRF1,YY1,MITF,FOS,BHLHE40,ESRRA,TBP,TAF9B,SPI1,SMAD1,NR2C1,ETS1,RXRA,TCF12,ATF7,CHD1,GATAD2B,ATF2,TAF1,PML,MXI1,TBP,XRCC5,HDAC2,CBX5,IKZ…	chr5	43600412	43605412	chr5	43603571
chr5	43603571	43604376	0.257033248081842	0.132538261490151	0.478260869565217	0.241379310344828	0.625105205873244	0.473011758112955	42	9.72682336264823e-13	chr5	43602993	43609244	Intron1	+	NNT	protein_coding	chr5	43603571	43604376	1	0.128779395296753	CpG: 67	chr5	43602977	43603650	chr5	43603571	43603650	*	*	*	*	*	0	0	chr5-43602485:43603935	chr5	43602485	43603935	chr5	43603571	43603935	KAT8,NFYB,CTCF,RAD21,MLLT1,KDM4B,EP400,ZBTB40,C11orf30,SMARCB1,NR3C1,FOXA1,ATF3,ZNF316,BRD9,CEBPB,SKIL,BRD4,ARID1B,AFF1,MTA2,PKNOX1,ZSCAN29,E4F1,NFIC,GABPB1,TRIM28,ZNF687,REST,POLR2A,ETV4,SP1,NFRKB,NR2F1,TBX21,RUNX3,RAD21,ELF4,RAD51,SIN3A,ZNF592,HNF4A,NR2F6,TAF1,IRF1,YY1,MITF,FOS,BHLHE40,ESRRA,TBP,TAF9B,SPI1,SMAD1,NR2C1,ETS1,RXRA,TCF12,ATF7,CHD1,GATAD2B,ATF2,TAF1,PML,MXI1,TBP,XRCC5,HDAC2,CBX5,IKZ…	chr5	43600412	43605412	chr5	43603571
chr5	50674272	50675737	0.219414893617021	-0.132653373203117	0.666666666666667	0.428571428571429	0.61075429900809	0.732077149064946	52	2.98926308541613e-11	chr5	50668570	50675331	FirstExon	-	CTD-2314G24.2	antisense	chr5	50674272	50675331	0.722866894197952	0.156633634077799	*	*	*	*	*	0	0	*	*	*	*	*	0	0	chr5-50674225:50674530	chr5	50674225	50674530	chr5	50674272	50674530	FOXA1,FOXA2,PKNOX1,EZH2,CBX8,SUZ12,GATA2,SMARCA4,RNF2,SIN3A,SP1,TRIM28,ASH2L,CTCF,TAF1,POLR2A,L3MBTL2,RAD21,CHD1,TBP,SIN3A,SMARCA4,CHD7,NANOG,CTCF,ESRRA,SMC3,RAD21,TRIM22,ARID3A,ZNF143,SMARCA4,PKNOX1,EZH2,ZNF384,SUZ12,SMC3,RNF2,MXI1,GATA3,TAF1,GATA2,L3MBTL2,CBX8,CTCF,ZFX,ASH2L,RBBP5,KDM4A,MYC,POLR2A,TAF7,EP300,HDAC2,TAF1,HNRNPLL,GMEB1,NRF1,SIN3A,TCF7L2,SMC3,SMARCA4,NANOG,RAD21,JUND,TCF12,REST,GAT…	chr5	50672296	50687773	chr5	50674272
chr5	50674272	50675737	0.219414893617021	-0.132653373203117	0.666666666666667	0.428571428571429	0.61075429900809	0.732077149064946	52	2.98926308541613e-11	chr5	50675332	50676332	Promoter	-	CTD-2314G24.2	antisense	chr5	50675332	50675737	0.276450511945392	0.405	*	*	*	*	*	0	0	*	*	*	*	*	0	0	chr5-50674565:50675370	chr5	50674565	50675370	chr5	50675332	50675370	FOXA1,FOXA2,PKNOX1,EZH2,CBX8,SUZ12,GATA2,SMARCA4,RNF2,SIN3A,SP1,TRIM28,ASH2L,CTCF,TAF1,POLR2A,L3MBTL2,RAD21,CHD1,TBP,SIN3A,SMARCA4,CHD7,NANOG,CTCF,ESRRA,SMC3,RAD21,TRIM22,ARID3A,ZNF143,SMARCA4,PKNOX1,EZH2,ZNF384,SUZ12,SMC3,RNF2,MXI1,GATA3,TAF1,GATA2,L3MBTL2,CBX8,CTCF,ZFX,ASH2L,RBBP5,KDM4A,MYC,POLR2A,TAF7,EP300,HDAC2,TAF1,HNRNPLL,GMEB1,NRF1,SIN3A,TCF7L2,SMC3,SMARCA4,NANOG,RAD21,JUND,TCF12,REST,GAT…	chr5	50672296	50687773	chr5	50675332
chr5	81248790	81257112	0.205365418894831	-0.338581955284695	0.869565217391304	0.644957983193277	0.504746418107059	0.860011095863594	143	2.05339024863918e-28	*	*	*	InterGenic	*	*	*	*	*	*	*	*	*	*	*	*	*	0	0	*	*	*	*	*	0	0	chr5-81249765:81249915	chr5	81249765	81249915	chr5	81249765	81249915	ZBTB33	chr5	81249810	81250107	chr5	81249810
chr5	103396969	103405934	0.216599190283401	-0.347686122756287	0.842105263157895	0.596491228070175	0.538880759365218	0.895671926147504	108	5.25123634180215e-21	*	*	*	InterGenic	*	*	*	*	*	*	*	*	*	*	*	*	*	0	0	*	*	*	*	*	0	0	chr5-103405920:103406130	chr5	103405920	103406130	chr5	103405920	103405934	NCOR1,CC2D1A,TRIM24,NCOA1,HDAC2,CBFA2T3,IKZF1,TCF12,TAL1,CBFA2T2	chr5	103404687	103405167	chr5	103404687
chr5	103415412	103416211	0.299047619047619	0.013972644978529	0.619047619047619	0.305555555555556	0.630617390961311	0.626442521051361	32	6.33054052149588e-10	chr5	103414611	103415611	Promoter	+	RP11-138J23.1	lincRNA	chr5	103415412	103415611	0.249061326658323	0.199	*	*	*	*	*	0	0	*	*	*	*	*	0	0	*	*	*	*	*	0	0	MNT,RNF2,SKIL,ATF7,DPF2,ARID1B,ELF1,POLR2A,FOXK2,SOX6,MTA3,HDAC2,CHAMP1,ZFP91,NFIC,CTBP1,SMARCA4,FOXA2,NCOR1,SMARCE1,LEF1,E2F1,L3MBTL2,EP400,ZNF24,ELF4,HDAC1,SP1,AFF1,EGR1,SMARCA5,CBFA2T3,TRIM24,ARNT,PHF20,ATF4,NFRKB,GABPB1,TAF9B,NR2F1,IKZF1,HNRNPLL,ZNF639,PHF21A,GATAD2A,NFATC3,MLLT1,BRD9,RB1,ZEB2,NCOA1,NRF1,ZSCAN29,YY1,BRD4,NCOA1,ZNF184,GATA3,RNF2	chr5	103415378	103416964	chr5	103415412
chr5	103415412	103416211	0.299047619047619	0.013972644978529	0.619047619047619	0.305555555555556	0.630617390961311	0.626442521051361	32	6.33054052149588e-10	chr5	103415612	103415825	FirstExon	+	RP11-138J23.1	lincRNA	chr5	103415612	103415825	0.266583229036295	1	*	*	*	*	*	0	0	*	*	*	*	*	0	0	*	*	*	*	*	0	0	MNT,RNF2,SKIL,ATF7,DPF2,ARID1B,ELF1,POLR2A,FOXK2,SOX6,MTA3,HDAC2,CHAMP1,ZFP91,NFIC,CTBP1,SMARCA4,FOXA2,NCOR1,SMARCE1,LEF1,E2F1,L3MBTL2,EP400,ZNF24,ELF4,HDAC1,SP1,AFF1,EGR1,SMARCA5,CBFA2T3,TRIM24,ARNT,PHF20,ATF4,NFRKB,GABPB1,TAF9B,NR2F1,IKZF1,HNRNPLL,ZNF639,PHF21A,GATAD2A,NFATC3,MLLT1,BRD9,RB1,ZEB2,NCOA1,NRF1,ZSCAN29,YY1,BRD4,NCOA1,ZNF184,GATA3,RNF2	chr5	103415378	103416964	chr5	103415612
chr5	103415412	103416211	0.299047619047619	0.013972644978529	0.619047619047619	0.305555555555556	0.630617390961311	0.626442521051361	32	6.33054052149588e-10	chr5	103415826	103416608	Intron1	+	RP11-138J23.1	lincRNA	chr5	103415826	103416211	0.481852315394243	0.4923273657289	*	*	*	*	*	0	0	*	*	*	*	*	0	0	*	*	*	*	*	0	0	MNT,RNF2,SKIL,ATF7,DPF2,ARID1B,ELF1,POLR2A,FOXK2,SOX6,MTA3,HDAC2,CHAMP1,ZFP91,NFIC,CTBP1,SMARCA4,FOXA2,NCOR1,SMARCE1,LEF1,E2F1,L3MBTL2,EP400,ZNF24,ELF4,HDAC1,SP1,AFF1,EGR1,SMARCA5,CBFA2T3,TRIM24,ARNT,PHF20,ATF4,NFRKB,GABPB1,TAF9B,NR2F1,IKZF1,HNRNPLL,ZNF639,PHF21A,GATAD2A,NFATC3,MLLT1,BRD9,RB1,ZEB2,NCOA1,NRF1,ZSCAN29,YY1,BRD4,NCOA1,ZNF184,GATA3,RNF2	chr5	103415378	103416964	chr5	103415826
chr5	113512499	113513121	0.225438596491228	0.203159912665013	0.431286549707602	0.147058823529411	0.707505725940964	0.513033967631181	21	0.00101298894532607	*	*	*	InterGenic	*	*	*	*	*	*	*	*	*	*	*	*	*	0	0	*	*	*	*	*	0	0	*	*	*	*	*	0	0	ZNF384	chr5	113512551	113512927	chr5	113512551
chr5	116789722	116791407	0.263377609108159	0.081653324731398	0.429276315789474	0.125490196078431	0.612382466361809	0.646006769265574	27	0.00404885641889382	chr5	116789958	116790958	Promoter	+	LINC00992	lincRNA	chr5	116789958	116790958	0.593471810089021	1	*	*	*	*	*	0	0	*	*	*	*	*	0	0	chr5-116790440:116790935	chr5	116790440	116790935	chr5	116790440	116790935	CTCF,RFX1,USF1,ZNF444,BHLHE40,MNT,ZNF143,ZNF574,TRIM22,RAD21,POLR2A,SMC3,GATA3,ZNF217,CUX1,ELF1,CTBP1,ZNF687,MTA1,FOXA1,MYC,PAX8,CLOCK,PKNOX1,RBM39,SIN3A,MNT,HCFC1,ZNF444,BHLHE40,RAD21,MYC,ZNF217,ELF1,TRIM22,EBF1,GATA3,ZNF574,ZNF143,SMARCA5,ZNF687,ZNF579,CLOCK,CTBP1	chr5	116789882	116791989	chr5	116789958
chr5	116789722	116791407	0.263377609108159	0.081653324731398	0.429276315789474	0.125490196078431	0.612382466361809	0.646006769265574	27	0.00404885641889382	chr5	116790959	116791150	FirstExon	+	LINC00992	lincRNA	chr5	116790959	116791150	0.113353115727003	1	*	*	*	*	*	0	0	*	*	*	*	*	0	0	chr5-116791125:116791275	chr5	116791125	116791275	chr5	116791125	116791150	CTCF,RFX1,USF1,ZNF444,BHLHE40,MNT,ZNF143,ZNF574,TRIM22,RAD21,POLR2A,SMC3,GATA3,ZNF217,CUX1,ELF1,CTBP1,ZNF687,MTA1,FOXA1,MYC,PAX8,CLOCK,PKNOX1,RBM39,SIN3A,MNT,HCFC1,ZNF444,BHLHE40,RAD21,MYC,ZNF217,ELF1,TRIM22,EBF1,GATA3,ZNF574,ZNF143,SMARCA5,ZNF687,ZNF579,CLOCK,CTBP1	chr5	116789882	116791989	chr5	116790959
chr5	116789722	116791407	0.263377609108159	0.081653324731398	0.429276315789474	0.125490196078431	0.612382466361809	0.646006769265574	27	0.00404885641889382	chr5	116791151	116807596	Intron1	+	LINC00992	lincRNA	chr5	116791151	116791407	0.151928783382789	0.0155670416539982	*	*	*	*	*	0	0	*	*	*	*	*	0	0	chr5-116791360:116791575	chr5	116791360	116791575	chr5	116791360	116791407	CTCF,RFX1,USF1,ZNF444,BHLHE40,MNT,ZNF143,ZNF574,TRIM22,RAD21,POLR2A,SMC3,GATA3,ZNF217,CUX1,ELF1,CTBP1,ZNF687,MTA1,FOXA1,MYC,PAX8,CLOCK,PKNOX1,RBM39,SIN3A,MNT,HCFC1,ZNF444,BHLHE40,RAD21,MYC,ZNF217,ELF1,TRIM22,EBF1,GATA3,ZNF574,ZNF143,SMARCA5,ZNF687,ZNF579,CLOCK,CTBP1	chr5	116789882	116791989	chr5	116791151
chr5	120033318	120044947	0.207261923136286	-0.333393983471165	0.88562091503268	0.644444444444444	0.449701497789927	0.832129382097974	135	9.1823325519822e-25	*	*	*	InterGenic	*	*	*	*	*	*	*	*	*	*	*	*	*	0	0	*	*	*	*	*	0	0	chr5-120042640:120042915	chr5	120042640	120042915	chr5	120042640	120042915	CHD7,JUND,JUN,NANOG	chr5	120042375	120042951	chr5	120042375
chr5	170190724	170196874	0.224637681159421	-0.351469438779801	0.841052631578947	0.591372912801485	0.519444385181599	0.904551619731201	99	2.7929918238647e-19	chr5	170194208	170194547	LastExon	-	MIR4454	antisense	chr5	170194208	170194547	0.0551219512195122	1	*	*	*	*	*	0	0	*	*	*	*	*	0	0	*	*	*	*	*	0	0	ATF7	chr5	170194535	170194951	chr5	170194535
chr5	170190724	170196874	0.224637681159421	-0.351469438779801	0.841052631578947	0.591372912801485	0.519444385181599	0.904551619731201	99	2.7929918238647e-19	chr5	170194548	170215207	Intron2	-	MIR4454	antisense	chr5	170194548	170196874	0.378211382113821	0.112590154412121	*	*	*	*	*	0	0	*	*	*	*	*	0	0	chr5-170196665:170196835	chr5	170196665	170196835	chr5	170196665	170196835	CTCF,HDAC2,KDM1A,ZNF143,MYC	chr5	170196660	170197920	chr5	170196660
chr5	175792029	175792952	-0.201779701779702	-0.225428467962134	0.222222222222222	0.432125307125307	0.45195913206611	0.696208889872933	93	2.96240792891239e-24	chr5	175791470	175792470	Promoter	+	ARL10	protein_coding	chr5	175792029	175792470	0.477789815817985	0.441	CpG: 133	chr5	175792355	175793505	chr5	175792355	175792470	*	*	*	*	*	0	0	chr5-175792100:175793995	chr5	175792100	175793995	chr5	175792100	175792470	L3MBTL2,ZBTB40,MLLT1,ASH2L,POLR2A,ZFX,CTCF,KDM4A,ZNF143,MAX,TCF12,SIN3A,MXI1,POU2F2,CREM,ARNT,IKZF1,EGR1,HCFC1,USF1,NR2C1,YY1,SIX5,BHLHE40,EP300,NR2F1,EZH2,ARID3A,KLF5,ELF1,SMARCA5,TRIM22,ZNF24,STAT1,HDAC2,BACH1,LEF1,GATAD2B,DPF2,PHF8,RCOR1,USF2,PAX5,USF1,L3MBTL2,REST,ZNF687,NRF1,ZBTB40,ZBTB33,MLLT1	chr5	175791748	175793937	chr5	175792029
chr5	175792029	175792952	-0.201779701779702	-0.225428467962134	0.222222222222222	0.432125307125307	0.45195913206611	0.696208889872933	93	2.96240792891239e-24	chr5	175792471	175792749	FirstExon	+	ARL10	protein_coding	chr5	175792471	175792749	0.301191765980498	1	CpG: 133	chr5	175792355	175793505	chr5	175792471	175792749	*	*	*	*	*	0	0	chr5-175792100:175793995	chr5	175792100	175793995	chr5	175792471	175792749	L3MBTL2,ZBTB40,MLLT1,ASH2L,POLR2A,ZFX,CTCF,KDM4A,ZNF143,MAX,TCF12,SIN3A,MXI1,POU2F2,CREM,ARNT,IKZF1,EGR1,HCFC1,USF1,NR2C1,YY1,SIX5,BHLHE40,EP300,NR2F1,EZH2,ARID3A,KLF5,ELF1,SMARCA5,TRIM22,ZNF24,STAT1,HDAC2,BACH1,LEF1,GATAD2B,DPF2,PHF8,RCOR1,USF2,PAX5,USF1,L3MBTL2,REST,ZNF687,NRF1,ZBTB40,ZBTB33,MLLT1	chr5	175791748	175793937	chr5	175792471
chr5	175792029	175792952	-0.201779701779702	-0.225428467962134	0.222222222222222	0.432125307125307	0.45195913206611	0.696208889872933	93	2.96240792891239e-24	chr5	175792750	175793382	Intron1	+	ARL10	protein_coding	chr5	175792750	175792952	0.218851570964247	0.319620253164557	CpG: 133	chr5	175792355	175793505	chr5	175792750	175792952	*	*	*	*	*	0	0	chr5-175792100:175793995	chr5	175792100	175793995	chr5	175792750	175792952	L3MBTL2,ZBTB40,MLLT1,ASH2L,POLR2A,ZFX,CTCF,KDM4A,ZNF143,MAX,TCF12,SIN3A,MXI1,POU2F2,CREM,ARNT,IKZF1,EGR1,HCFC1,USF1,NR2C1,YY1,SIX5,BHLHE40,EP300,NR2F1,EZH2,ARID3A,KLF5,ELF1,SMARCA5,TRIM22,ZNF24,STAT1,HDAC2,BACH1,LEF1,GATAD2B,DPF2,PHF8,RCOR1,USF2,PAX5,USF1,L3MBTL2,REST,ZNF687,NRF1,ZBTB40,ZBTB33,MLLT1	chr5	175791748	175793937	chr5	175792750
chr5	177387004	177390152	0.229249011857708	-0.392253769036142	0.92	0.684210526315789	0.362329234113302	0.793688078818849	112	9.60858921150612e-33	chr5	177366768	177409653	Intron1	+	RP11-1252I4.2	antisense	chr5	177387004	177390152	1	0.073405619680541	CpG: 36	chr5	177388753	177389250	chr5	177388753	177389250	*	*	*	*	*	0	0	chr5-177390005:177390195	chr5	177390005	177390195	chr5	177390005	177390152	ZNF316	chr5	177389556	177389966	chr5	177389556
chr5	177387004	177390152	0.229249011857708	-0.392253769036142	0.92	0.684210526315789	0.362329234113302	0.793688078818849	112	9.60858921150612e-33	chr5	177384681	177390827	Intron3	+	RP11-423H2.3	antisense	chr5	177387004	177390152	1	0.512203058900098	CpG: 36	chr5	177388753	177389250	chr5	177388753	177389250	*	*	*	*	*	0	0	chr5-177390005:177390195	chr5	177390005	177390195	chr5	177390005	177390152	ZNF316	chr5	177389556	177389966	chr5	177389556
chr5	179539777	179541080	0.27163036680534	-0.296357332032501	0.8	0.541103603603604	0.594965071013805	0.899461694595076	75	4.46513918555009e-20	chr5	179538581	179541445	Intron11	-	RASGEF1C	protein_coding	chr5	179539777	179541080	1	0.454958100558659	*	*	*	*	*	0	0	*	*	*	*	*	0	0	chr5-179541065:179541215	chr5	179541065	179541215	chr5	179541065	179541080	IKZF1,KDM1A	chr5	179540422	179541115	chr5	179540422
chr6	5085009	5085847	-0.219696969696969	-0.27814569360464	0.153846153846154	0.382978723404255	0.330421420178476	0.636369108028042	78	5.3306415709346e-20	chr6	5084719	5085719	Promoter	+	PPP1R3G	protein_coding	chr6	5085009	5085719	0.847255369928401	0.71	CpG: 267	chr6	5084516	5087032	chr6	5085009	5085719	*	*	*	*	*	0	0	chr6-5084385:5085895	chr6	5084385	5085895	chr6	5085009	5085719	HDAC1,ZBTB7A,POLR2A,RBFOX2,ASH2L,EHMT2,KDM1A,CREM,SOX13,PHF21A,NCOR1,NFE2L2,DPF2,ARID3A,HNF4G,FOSL2,JUND,TAF1,CREB1,SIN3A,TBP,MNT,FOS,LCORL,STAT3,SKI,EP300,ZNF217,XRCC5,NFIB,MAFF,CTBP1,POLR2G,MYC,YY1,POLR2A,CEBPB,TAF15,RBM39,EGR1,PKNOX1,NR2F6,RXRA,REST,BHLHE40,MAX,ZHX2,HDAC2,HNRNPLL,HNRNPL,SP1,ZBTB7A,USF1,RBM22,EZH2,HDAC2,SMARCA4,BCOR,RBM39,POLR2G,RNF2,KDM5B,ASH2L,HNRNPLL,ZFX,RBBP5,TBP,LCORL,DPF2…	chr6	5081974	5087170	chr6	5085009
chr6	5085009	5085847	-0.219696969696969	-0.27814569360464	0.153846153846154	0.382978723404255	0.330421420178476	0.636369108028042	78	5.3306415709346e-20	chr6	5085720	5087455	FirstExon	+	PPP1R3G	protein_coding	chr6	5085720	5085847	0.151551312649165	0.0731988472622478	CpG: 267	chr6	5084516	5087032	chr6	5085720	5085847	*	*	*	*	*	0	0	chr6-5084385:5085895	chr6	5084385	5085895	chr6	5085720	5085847	HDAC1,ZBTB7A,POLR2A,RBFOX2,ASH2L,EHMT2,KDM1A,CREM,SOX13,PHF21A,NCOR1,NFE2L2,DPF2,ARID3A,HNF4G,FOSL2,JUND,TAF1,CREB1,SIN3A,TBP,MNT,FOS,LCORL,STAT3,SKI,EP300,ZNF217,XRCC5,NFIB,MAFF,CTBP1,POLR2G,MYC,YY1,POLR2A,CEBPB,TAF15,RBM39,EGR1,PKNOX1,NR2F6,RXRA,REST,BHLHE40,MAX,ZHX2,HDAC2,HNRNPLL,HNRNPL,SP1,ZBTB7A,USF1,RBM22,EZH2,HDAC2,SMARCA4,BCOR,RBM39,POLR2G,RNF2,KDM5B,ASH2L,HNRNPLL,ZFX,RBBP5,TBP,LCORL,DPF2…	chr6	5081974	5087170	chr6	5085720
chr6	16882526	16891869	0.203203203203203	-0.353927906083561	0.88	0.634146341463415	0.501840463501648	0.864705963877062	104	1.0830363876378e-22	*	*	*	InterGenic	*	*	*	*	*	*	*	*	*	*	*	*	*	0	0	*	*	*	*	*	0	0	chr6-16883440:16883610	chr6	16883440	16883610	chr6	16883440	16883610	RNF2,BMI1	chr6	16881760	16882564	chr6	16882526
chr6	19539983	19544953	0.225	-0.316973233510009	0.863636363636364	0.62962962962963	0.538601510646751	0.876493902693652	78	5.37513094995436e-14	chr6	19539199	19640711	Intron2	-	RP1-167F1.2	antisense	chr6	19539983	19544953	1	0.0489597288990464	*	*	*	*	*	0	0	*	*	*	*	*	0	0	chr6-19540780:19540930	chr6	19540780	19540930	chr6	19540780	19540930	*	*	*	*	*	0
chr6	26234860	26235507	0.246876802911286	0.155075849729349	0.5	0.23733583489681	0.609720812304786	0.446417814521009	29	4.5511347448817e-09	chr6	26234440	26235216	FirstExon	-	HIST1H1D	protein_coding	chr6	26234860	26235216	0.550231839258114	0.458762886597938	*	*	*	*	*	0	0	*	*	*	*	*	0	0	chr6-26233780:26235375	chr6	26233780	26235375	chr6	26234860	26235216	POLR2A,POLR2G,GABPA,FOS,STAT3,TAF7,SMAD5,PKNOX1,TAF7,SMARCA4,RBM22,FUS,POLR2A,IKZF2,KDM1A,HDAC2,FOXA1,FOXA2,HDAC1,PHF21A,PCBP2,CHD7,SMAD1,MLLT1,IKZF1,NFATC3,CBFA2T3,MEIS2,CHD1,GATA3,ASH2L,DPF2,PKNOX1,TBP,CREB1,BCL11A,TAL1,RFX5,AGO1,MAFK,XRCC5,RBBP5,ZNF384,NFYB,USF2,SP1,PHF8,WRNIP1,MLLT1,CTCF,TAF1,RBFOX2,POU2F2,MNT,MYC,PTBP1,ZBTB33,SMARCA5,SNRNP70,SMAD5,ZNF207,JUND,MTA2,GABPA,PAX8,NR2F2,TAF7,HNRNP…	chr6	26230090	26236956	chr6	26234860
chr6	26234860	26235507	0.246876802911286	0.155075849729349	0.5	0.23733583489681	0.609720812304786	0.446417814521009	29	4.5511347448817e-09	chr6	26235217	26236217	Promoter	-	HIST1H1D	protein_coding	chr6	26235217	26235507	0.44822256568779	0.29	*	*	*	*	*	0	0	*	*	*	*	*	0	0	chr6-26233780:26235375	chr6	26233780	26235375	chr6	26235217	26235375	POLR2A,POLR2G,GABPA,FOS,STAT3,TAF7,SMAD5,PKNOX1,TAF7,SMARCA4,RBM22,FUS,POLR2A,IKZF2,KDM1A,HDAC2,FOXA1,FOXA2,HDAC1,PHF21A,PCBP2,CHD7,SMAD1,MLLT1,IKZF1,NFATC3,CBFA2T3,MEIS2,CHD1,GATA3,ASH2L,DPF2,PKNOX1,TBP,CREB1,BCL11A,TAL1,RFX5,AGO1,MAFK,XRCC5,RBBP5,ZNF384,NFYB,USF2,SP1,PHF8,WRNIP1,MLLT1,CTCF,TAF1,RBFOX2,POU2F2,MNT,MYC,PTBP1,ZBTB33,SMARCA5,SNRNP70,SMAD5,ZNF207,JUND,MTA2,GABPA,PAX8,NR2F2,TAF7,HNRNP…	chr6	26230090	26236956	chr6	26235217
chr6	28511376	28512749	0.217171717171717	0.0678755667950991	0.6	0.375	0.694987500240385	0.623512680879093	40	2.04900509577757e-08	*	*	*	InterGenic	*	*	*	*	*	*	*	*	*	*	*	*	*	0	0	*	*	*	*	*	0	0	chr6-28511360:28511915	chr6	28511360	28511915	chr6	28511376	28511915	SMARCA4,ASH2L,ZNF184,ZBTB40,CTCF,L3MBTL2,NFATC3,DNMT1,SMAD5,SMARCB1,KDM5B,GABPB1,POLR2A,ELF4,FOXK2,SMARCC2,PHF8,C11orf30,TBP,RBFOX2,NRF1,ELK1,IKZF2,E4F1,MAFF,HMBOX1,NBN,EHMT2,E2F1,MEIS2,PRDM10,ZBTB33,ZEB2,HNRNPLL,CC2D1A,SRF,RAD21,PHF20,TBL1XR1,MXI1,TAF1,MYBL2,MAX,CREB1,TRIM28,CHD1,ESRRA,EP300,TRIM22,JUN,MLLT1,MNT,JUND,XRCC5,BHLHE40,HCFC1,REST,RELB,TCF7L2,ZFP91,NR2F1,YY1,IRF2,CTBP1,NEUROD1,KAT2B,P…	chr6	28509842	28512315	chr6	28511376
chr6	29521075	29521831	0.252380952380952	-0.173916676329067	0.785714285714286	0.522727272727273	0.498880254062286	0.692698643744072	82	3.43255726402666e-26	*	*	*	InterGenic	*	*	*	*	*	*	*	*	CpG: 80	chr6	29521110	29521833	chr6	29521110	29521831	chr6:29521167-29521548	chr6	29521167	29521548	chr6	29521167	29521548	chr6-29521085:29521315	chr6	29521085	29521315	chr6	29521085	29521315	RFX5,SRF,E2F1,RBM25,CEBPB,EZH2,CREB1,NFYB,ZBTB40,CREM,MXI1,RBFOX2,KDM4A,TAF1,HDAC6,GATAD2B,DPF2,KDM1A,ASH2L,SMC3,CTCF,AGO2,RFX5,SUZ12,SETDB1,RAD21,REST,CEBPB,TBP,L3MBTL2,ZBTB33,BHLHE40,USF2,USF1,SRF,ZNF316,C11orf30,MAFF,MAFK	chr6	29520253	29522909	chr6	29521075
chr6	30434029	30435185	0.234697933227345	-0.183410030775585	0.741666666666666	0.485281385281385	0.517348454924871	0.732757854476984	75	1.13355127118486e-23	*	*	*	InterGenic	*	*	*	*	*	*	*	*	CpG: 43	chr6	30434029	30434422	chr6	30434029	30434422	chr6:30434534-30434831	chr6	30434534	30434831	chr6	30434534	30434831	chr6-30433785:30434035	chr6	30433785	30434035	chr6	30434029	30434035	EZH2,HMBOX1,HDAC1,MLLT1,CTCF,CBFB,HNRNPLL,GABPA,ESRRA,RUNX3,SPI1,MIER1,RNF2,NFATC3,TAF15,FOXA2,ETV4,FOXA1,CTCF,EZH2,EBF1,ESRRA,EZH2,CBX8,ASH2L,SUZ12,RBM39,XRCC5,AGO1,TAF15,RNF2,TBL1XR1,IKZF1,ZNF282,ZSCAN29,NFATC3,UBTF,SMARCA4,CBX3,BCOR,GABPA,MAX,SOX6,MLLT1,CTCF,KDM4A,ZFX,NR3C1,CTBP1,L3MBTL2,ZNF639,POLR2A,RB1,E2F6,PHF20,NRF1,MEIS2,NBN,E2F4,TFAP4,BMI1,CBX2,ZNF384	chr6	30430879	30435182	chr6	30434029
chr6	31704627	31705284	0.205847953216374	-0.204091715511707	0.789473684210526	0.63265306122449	0.700977811460783	0.921941565029059	14	0.0577276613562953	chr6	31704128	31707040	Intron2	-	CLIC1	protein_coding	chr6	31704627	31705284	1	0.225618131868132	*	*	*	*	*	0	0	*	*	*	*	*	0	0	chr6-31704680:31704910	chr6	31704680	31704910	chr6	31704680	31704910	IKZF1,ZBTB7A,CBFA2T2,CBFA2T3,EGR1,PCBP1,ESR1,AGO1,FIP1L1,RBFOX2,PRPF4,POLR2G,AGO2,ZBTB33,RBM39,POLR2A,ZBTB7A,POLR2G,TRIM24,ARID2,NCOA4,PHF8,NFRKB,RBBP5,POLR2A,NRF1,SAP30,KDM5B,ZBTB40,SMARCE1,ZNF24,LEF1,HDAC1,ARNT,EP300,AFF1,SUZ12,E2F8,ZNF184,BRD9,CREB3L1,CEBPB,CTBP1,E4F1,GATA1,EGR1,MTA3,HMBOX1,SMARCA4,KLF16,DPF2,ELF1,HDAC2,REST,CREBBP,L3MBTL2,ZEB2,MYC,SMARCC2,IKZF1,MTA1,MEIS2,SOX6,FOXK2,NFATC3,MI…	chr6	31690734	31710180	chr6	31704627
chr6	33386966	33388197	0.2175	0.238095238095238	0.470588235294118	0.185185185185185	0.720659393226518	0.539063190864238	28	0.000812868940166144	chr6	33386095	33387095	Promoter	-	CUTA	protein_coding	chr6	33386966	33387095	0.104792851340374	0.129	*	*	*	*	*	0	0	chr6:33386765-33387072	chr6	33386765	33387072	chr6	33386966	33387072	chr6-33386620:33387055	chr6	33386620	33387055	chr6	33386966	33387055	SMARCB1,ELF4,GABPA,IKZF2,SIN3A,FOXK2,CBX3,ELF1,MYC,GABPB1,CDC5L,KDM5A,CHD1,ETS1,ETV4,RUNX3,SPI1,IRF2,MIER1,ARID1B,ZNF24,EP300,GATA1,YY1,NBN,SMARCA4,TBL1XR1,TRIM28,POLR2A,REST,JUND,NCOR1,NFRKB,PHF8,KDM5B,MLLT1,POLR2G,RXRA,RBFOX2,NR2F6,DPF2,HDAC2,ARNT,PHF21A,RNF2,GATAD2A,MNT,HDAC1,NCOA1,NFATC3,SMARCE1,ASH2L,ATF2,AFF1,EGR1,ATF7,ZNF687,SMAD1,HNF4G,KDM1A,TBP,RELB,PKNOX1,PML,RBBP5,CLOCK,SAP30,TRIM24,HN…	chr6	33377131	33389555	chr6	33386966
chr6	33386966	33388197	0.2175	0.238095238095238	0.470588235294118	0.185185185185185	0.720659393226518	0.539063190864238	28	0.000812868940166144	chr6	33386940	33387940	Promoter	+	SYNGAP1	protein_coding	chr6	33386966	33387940	0.791226645004062	0.974	*	*	*	*	*	0	0	chr6:33386765-33387072	chr6	33386765	33387072	chr6	33386966	33387072	chr6-33386620:33387055	chr6	33386620	33387055	chr6	33386966	33387055	SMARCB1,ELF4,GABPA,IKZF2,SIN3A,FOXK2,CBX3,ELF1,MYC,GABPB1,CDC5L,KDM5A,CHD1,ETS1,ETV4,RUNX3,SPI1,IRF2,MIER1,ARID1B,ZNF24,EP300,GATA1,YY1,NBN,SMARCA4,TBL1XR1,TRIM28,POLR2A,REST,JUND,NCOR1,NFRKB,PHF8,KDM5B,MLLT1,POLR2G,RXRA,RBFOX2,NR2F6,DPF2,HDAC2,ARNT,PHF21A,RNF2,GATAD2A,MNT,HDAC1,NCOA1,NFATC3,SMARCE1,ASH2L,ATF2,AFF1,EGR1,ATF7,ZNF687,SMAD1,HNF4G,KDM1A,TBP,RELB,PKNOX1,PML,RBBP5,CLOCK,SAP30,TRIM24,HN…	chr6	33377131	33389555	chr6	33386966
chr6	33386966	33388197	0.2175	0.238095238095238	0.470588235294118	0.185185185185185	0.720659393226518	0.539063190864238	28	0.000812868940166144	chr6	33387941	33388108	FirstExon	+	SYNGAP1	protein_coding	chr6	33387941	33388108	0.135662063363119	1	*	*	*	*	*	0	0	*	*	*	*	*	0	0	chr6-33387725:33388235	chr6	33387725	33388235	chr6	33387941	33388108	SMARCB1,ELF4,GABPA,IKZF2,SIN3A,FOXK2,CBX3,ELF1,MYC,GABPB1,CDC5L,KDM5A,CHD1,ETS1,ETV4,RUNX3,SPI1,IRF2,MIER1,ARID1B,ZNF24,EP300,GATA1,YY1,NBN,SMARCA4,TBL1XR1,TRIM28,POLR2A,REST,JUND,NCOR1,NFRKB,PHF8,KDM5B,MLLT1,POLR2G,RXRA,RBFOX2,NR2F6,DPF2,HDAC2,ARNT,PHF21A,RNF2,GATAD2A,MNT,HDAC1,NCOA1,NFATC3,SMARCE1,ASH2L,ATF2,AFF1,EGR1,ATF7,ZNF687,SMAD1,HNF4G,KDM1A,TBP,RELB,PKNOX1,PML,RBBP5,CLOCK,SAP30,TRIM24,HN…	chr6	33377131	33389555	chr6	33387941
chr6	33386966	33388197	0.2175	0.238095238095238	0.470588235294118	0.185185185185185	0.720659393226518	0.539063190864238	28	0.000812868940166144	chr6	33388109	33391253	Intron1	+	SYNGAP1	protein_coding	chr6	33388109	33388197	0.0714865962632007	0.0279898218829517	*	*	*	*	*	0	0	*	*	*	*	*	0	0	chr6-33387725:33388235	chr6	33387725	33388235	chr6	33388109	33388197	SMARCB1,ELF4,GABPA,IKZF2,SIN3A,FOXK2,CBX3,ELF1,MYC,GABPB1,CDC5L,KDM5A,CHD1,ETS1,ETV4,RUNX3,SPI1,IRF2,MIER1,ARID1B,ZNF24,EP300,GATA1,YY1,NBN,SMARCA4,TBL1XR1,TRIM28,POLR2A,REST,JUND,NCOR1,NFRKB,PHF8,KDM5B,MLLT1,POLR2G,RXRA,RBFOX2,NR2F6,DPF2,HDAC2,ARNT,PHF21A,RNF2,GATAD2A,MNT,HDAC1,NCOA1,NFATC3,SMARCE1,ASH2L,ATF2,AFF1,EGR1,ATF7,ZNF687,SMAD1,HNF4G,KDM1A,TBP,RELB,PKNOX1,PML,RBBP5,CLOCK,SAP30,TRIM24,HN…	chr6	33377131	33389555	chr6	33388109
chr6	34036687	34046980	0.230769230769231	-0.295158432409112	0.833333333333333	0.555555555555556	0.561825099075778	0.855148339614285	142	1.2007125204667e-21	chr6	34029806	34059659	Intron2	-	GRM4	protein_coding	chr6	34036687	34046980	1	0.344789468395136	*	*	*	*	*	0	0	*	*	*	*	*	0	0	chr6-34036785:34036935	chr6	34036785	34036935	chr6	34036785	34036935	SMC3,CTCF,RAD21,CBFA2T3	chr6	34036321	34037065	chr6	34036687
chr6	44055931	44056382	-0.205128205128205	0.085863693722235	0.583333333333333	0.823529411764706	0.798746875060096	0.720234917629261	6	0.208690443136964	*	*	*	InterGenic	*	*	*	*	*	*	*	*	*	*	*	*	*	0	0	*	*	*	*	*	0	0	*	*	*	*	*	0	0	CHD4,HDAC2,PTBP1,CBX1,ESRRA,SMARCA5,ZMYM3,RBM25,KDM1A,CTCF,BCOR,ZNF143,ARHGAP35	chr6	44056379	44057199	chr6	44056379
chr6	48390158	48404830	0.238506387403446	0.105817929767948	0.513157894736842	0.231663685152057	0.755380320919111	0.664759566212691	69	5.87047340507125e-10	*	*	*	InterGenic	*	*	*	*	*	*	*	*	*	*	*	*	*	0	0	*	*	*	*	*	0	0	chr6-48391420:48391650	chr6	48391420	48391650	chr6	48391420	48391650	ZNF316,MAFF,MAFK,FOS,JUND,CEBPB	chr6	48391352	48392104	chr6	48391352
chr6	78359857	78360439	0.244940307758644	0.261117980878584	0.333333333333333	0.0769230769230769	0.508713283095481	0.262667065054594	41	2.76920728657233e-10	*	*	*	InterGenic	*	*	*	*	*	*	*	*	CpG: 36	chr6	78359857	78360344	chr6	78359857	78360344	*	*	*	*	*	0	0	chr6-78359840:78360355	chr6	78359840	78360355	chr6	78359857	78360355	CHD1,CTCF,KDM4A,YY1,POLR2A,RBBP5,HNF4A,BRCA1,TAF1,RAD21,HNRNPLL,TBP,MNT,ASH2L,SP1,L3MBTL2,REST,SIN3A,MGA,NRF1,ZNF143,PHF8,HDAC2,MAX,BACH1,MYC,RB1,USF1,BHLHE40,SMARCA4,USF2,RAD21,SMC3,E2F6,USF2	chr6	78359434	78360734	chr6	78359857
chr6	78369803	78375857	0.214285714285714	-0.318875573127289	0.857142857142857	0.606060606060606	0.509169022530082	0.849870957257834	112	7.27645581985317e-20	*	*	*	InterGenic	*	*	*	*	*	*	*	*	*	*	*	*	*	0	0	*	*	*	*	*	0	0	*	*	*	*	*	0	0	*	*	*	*	*	0
chr6	108487590	108487956	0.294258373205741	0.135258125293966	0.58974358974359	0.303571428571429	0.664004665425195	0.557178229024644	28	2.38290698879625e-09	chr6	108487262	108487994	FirstExon	+	NR2E1	protein_coding	chr6	108487590	108487956	1	0.5	CpG: 318	chr6	108485671	108490539	chr6	108487590	108487956	*	*	*	*	*	0	0	chr6-108486705:108489175	chr6	108486705	108489175	chr6	108487590	108487956	RNF2,SP1,HDAC2,TCF12,USF1,NANOG,EZH2,CBX8,SUZ12,RNF2,RNF2,CBX8,ZKSCAN1,EZH2,FOXA2,EZH2,SUZ12,CTCF,HDAC2,KDM1A,ZNF444,ZMYM3,BCOR,RBM25,ZNF143,RAD21,TCF12,FOS,RNF2,USF1,ASH2L,KDM4A,CHD1,CBX8,L3MBTL2,ZBTB33,ZNF143,RBBP5,MXI1,CTCF,JUND,L3MBTL2,TCF12,CHD1,EGR1,ASH2L,KDM1A,HDAC2,YY1,SIN3A,ZNF143,SP1,EGR1,TCF12,RBM39,NRF1,CTCF,HNRNPLL,XRCC5,RAD21,ZBTB33,AGO1,TAF15,KDM4A,RNF2,CHD1,DACH1,RBBP5,ASH2L,SP1,T…	chr6	108481233	108498884	chr6	108487590
chr6	108487983	108490618	0.267990074441688	-0.232110915340765	0.805555555555556	0.508196721311475	0.575491372751458	0.826256279307324	164	7.07966349792491e-41	chr6	108487262	108487994	FirstExon	+	NR2E1	protein_coding	chr6	108487983	108487994	0.00417457305502846	0.0150273224043716	CpG: 318	chr6	108485671	108490539	chr6	108487983	108487994	*	*	*	*	*	0	0	chr6-108486705:108489175	chr6	108486705	108489175	chr6	108487983	108487994	RNF2,SP1,HDAC2,TCF12,USF1,NANOG,EZH2,CBX8,SUZ12,RNF2,RNF2,CBX8,ZKSCAN1,EZH2,FOXA2,EZH2,SUZ12,CTCF,HDAC2,KDM1A,ZNF444,ZMYM3,BCOR,RBM25,ZNF143,RAD21,TCF12,FOS,RNF2,USF1,ASH2L,KDM4A,CHD1,CBX8,L3MBTL2,ZBTB33,ZNF143,RBBP5,MXI1,CTCF,JUND,L3MBTL2,TCF12,CHD1,EGR1,ASH2L,KDM1A,HDAC2,YY1,SIN3A,ZNF143,SP1,EGR1,TCF12,RBM39,NRF1,CTCF,HNRNPLL,XRCC5,RAD21,ZBTB33,AGO1,TAF15,KDM4A,RNF2,CHD1,DACH1,RBBP5,ASH2L,SP1,T…	chr6	108481233	108498884	chr6	108487983
chr6	108487983	108490618	0.267990074441688	-0.232110915340765	0.805555555555556	0.508196721311475	0.575491372751458	0.826256279307324	164	7.07966349792491e-41	chr6	108487995	108492661	Intron1	+	NR2E1	protein_coding	chr6	108487995	108490618	0.995445920303605	0.56215173596228	CpG: 318	chr6	108485671	108490539	chr6	108487995	108490539	*	*	*	*	*	0	0	chr6-108489240:108491475	chr6	108489240	108491475	chr6	108489240	108490618	RNF2,SP1,HDAC2,TCF12,USF1,NANOG,EZH2,CBX8,SUZ12,RNF2,RNF2,CBX8,ZKSCAN1,EZH2,FOXA2,EZH2,SUZ12,CTCF,HDAC2,KDM1A,ZNF444,ZMYM3,BCOR,RBM25,ZNF143,RAD21,TCF12,FOS,RNF2,USF1,ASH2L,KDM4A,CHD1,CBX8,L3MBTL2,ZBTB33,ZNF143,RBBP5,MXI1,CTCF,JUND,L3MBTL2,TCF12,CHD1,EGR1,ASH2L,KDM1A,HDAC2,YY1,SIN3A,ZNF143,SP1,EGR1,TCF12,RBM39,NRF1,CTCF,HNRNPLL,XRCC5,RAD21,ZBTB33,AGO1,TAF15,KDM4A,RNF2,CHD1,DACH1,RBBP5,ASH2L,SP1,T…	chr6	108481233	108498884	chr6	108487995
chr6	115348121	115358703	0.207407407407408	-0.186394850793531	0.75	0.511111111111111	0.670640309531598	0.837703653096255	100	1.47861465417205e-15	*	*	*	InterGenic	*	*	*	*	*	*	*	*	*	*	*	*	*	0	0	*	*	*	*	*	0	0	chr6-115357040:115357190	chr6	115357040	115357190	chr6	115357040	115357190	*	*	*	*	*	0
chr6	123161757	123165457	0.213193673695894	-0.364704927666577	0.866666666666667	0.617601547388781	0.49685711738169	0.881386248654879	57	9.8316248931619e-16	*	*	*	InterGenic	*	*	*	*	*	*	*	*	*	*	*	*	*	0	0	*	*	*	*	*	0	0	*	*	*	*	*	0	0	*	*	*	*	*	0
chr6	157467987	157469079	0.302727272727273	-0.328221808611001	0.847826086956522	0.530612244897959	0.609130798490972	0.934952308934623	74	1.68850223162971e-24	chr6	157454342	157469757	Intron8	+	ARID1B	protein_coding	chr6	157467987	157469079	1	0.0708400908206293	*	*	*	*	*	0	0	*	*	*	*	*	0	0	chr6-157468645:157469115	chr6	157468645	157469115	chr6	157468645	157469079	EGR1	chr6	157468442	157468822	chr6	157468442
chr6	157731576	157735296	0.379428694554745	-0.705517029423657	0.9375	0.568029458974601	0.226455093100073	0.925100253647414	87	9.87905186229427e-30	chr6	157714032	157739813	Intron3	-	TMEM242	protein_coding	chr6	157731576	157735296	1	0.14429230828905	*	*	*	*	*	0	0	*	*	*	*	*	0	0	chr6-157735105:157735410	chr6	157735105	157735410	chr6	157735105	157735296	*	*	*	*	*	0
chr6	158186046	158206230	0.240764714204866	-0.316801507875005	0.853912601626016	0.588562091503268	0.583574983757853	0.910944596401159	279	2.84241846065882e-57	*	*	*	InterGenic	*	*	*	*	*	*	*	*	*	*	*	*	*	0	0	chr6:158191942-158192437	chr6	158191942	158192437	chr6	158191942	158192437	chr6-158203885:158204035	chr6	158203885	158204035	chr6	158203885	158204035	FOXA2,ATF3,ATF7	chr6	158204950	158205897	chr6	158204950
chr6	160769236	160770118	0.274294670846395	-0.0369021510068051	0.647058823529412	0.365079365079365	0.647081730764046	0.687820127227082	112	1.04767057774525e-34	chr6	160768299	160769299	Promoter	+	SLC22A3	protein_coding	chr6	160769236	160769299	0.0714285714285714	0.063	CpG: 188	chr6	160768414	160770308	chr6	160769236	160769299	*	*	*	*	*	0	0	chr6-160768585:160770395	chr6	160768585	160770395	chr6	160769236	160769299	TAF1,PCBP1,RBFOX2,HNF4A,EZH2,CTCF,NR3C1,POLR2A,NRF1,POLR2G,HNRNPL,BRD4,ZKSCAN1,HNRNPK,SKI,TBP,RNF2,HNRNPLL,HDAC2,AGO2,MXI1,KDM4A,ASH2L,SUZ12,GABPA,RBBP5,SRSF4,CTCF,RBM39,BRD4,SIN3A,EP300,TBP,FIP1L1,RNF2,HDAC1,TAF1,POLR2G,YY1,NRF1,MAX,SP1,REST,XRCC5,NR2F2,ZHX2,HNF4A,RXRA,CREM,ZBTB33,JUND,ETV4,RAD21,KDM1A,EGR1,ATF3,GATA4,SOX13,FOXA2,ELF1,NR2F6,LCORL,FOXA1,FOSL2,HNF4G,TCF7,TFAP4,CEBPB,NCOR1,POLR2A,M…	chr6	160768390	160771835	chr6	160769236
chr6	160769236	160770118	0.274294670846395	-0.0369021510068051	0.647058823529412	0.365079365079365	0.647081730764046	0.687820127227082	112	1.04767057774525e-34	chr6	160769300	160769880	FirstExon	+	SLC22A3	protein_coding	chr6	160769300	160769880	0.657596371882086	1	CpG: 188	chr6	160768414	160770308	chr6	160769300	160769880	*	*	*	*	*	0	0	chr6-160768585:160770395	chr6	160768585	160770395	chr6	160769300	160769880	TAF1,PCBP1,RBFOX2,HNF4A,EZH2,CTCF,NR3C1,POLR2A,NRF1,POLR2G,HNRNPL,BRD4,ZKSCAN1,HNRNPK,SKI,TBP,RNF2,HNRNPLL,HDAC2,AGO2,MXI1,KDM4A,ASH2L,SUZ12,GABPA,RBBP5,SRSF4,CTCF,RBM39,BRD4,SIN3A,EP300,TBP,FIP1L1,RNF2,HDAC1,TAF1,POLR2G,YY1,NRF1,MAX,SP1,REST,XRCC5,NR2F2,ZHX2,HNF4A,RXRA,CREM,ZBTB33,JUND,ETV4,RAD21,KDM1A,EGR1,ATF3,GATA4,SOX13,FOXA2,ELF1,NR2F6,LCORL,FOXA1,FOSL2,HNF4G,TCF7,TFAP4,CEBPB,NCOR1,POLR2A,M…	chr6	160768390	160771835	chr6	160769300
chr6	160769236	160770118	0.274294670846395	-0.0369021510068051	0.647058823529412	0.365079365079365	0.647081730764046	0.687820127227082	112	1.04767057774525e-34	chr6	160769881	160819010	Intron1	+	SLC22A3	protein_coding	chr6	160769881	160770118	0.268707482993197	0.00482403468419874	CpG: 188	chr6	160768414	160770308	chr6	160769881	160770118	*	*	*	*	*	0	0	chr6-160768585:160770395	chr6	160768585	160770395	chr6	160769881	160770118	TAF1,PCBP1,RBFOX2,HNF4A,EZH2,CTCF,NR3C1,POLR2A,NRF1,POLR2G,HNRNPL,BRD4,ZKSCAN1,HNRNPK,SKI,TBP,RNF2,HNRNPLL,HDAC2,AGO2,MXI1,KDM4A,ASH2L,SUZ12,GABPA,RBBP5,SRSF4,CTCF,RBM39,BRD4,SIN3A,EP300,TBP,FIP1L1,RNF2,HDAC1,TAF1,POLR2G,YY1,NRF1,MAX,SP1,REST,XRCC5,NR2F2,ZHX2,HNF4A,RXRA,CREM,ZBTB33,JUND,ETV4,RAD21,KDM1A,EGR1,ATF3,GATA4,SOX13,FOXA2,ELF1,NR2F6,LCORL,FOXA1,FOSL2,HNF4G,TCF7,TFAP4,CEBPB,NCOR1,POLR2A,M…	chr6	160768390	160771835	chr6	160769881
chr6	167833174	167848433	0.209429280397022	-0.364522763543965	0.875	0.638888888888889	0.48377156288324	0.859671918224467	340	1.88224698898109e-65	*	*	*	InterGenic	*	*	*	*	*	*	*	*	CpG: 144	chr6	167834865	167836616	chr6	167834865	167836616	chr6:167837583-167837890	chr6	167837583	167837890	chr6	167837583	167837890	chr6-167848225:167848375	chr6	167848225	167848375	chr6	167848225	167848375	ZNF24	chr6	167846263	167846627	chr6	167846263
chr6	167917596	167927591	0.226342710997442	-0.187559078020975	0.766666666666667	0.527272727272727	0.69026812649357	0.895323902432185	204	7.88582756686195e-29	*	*	*	InterGenic	*	*	*	*	*	*	*	*	*	*	*	*	*	0	0	*	*	*	*	*	0	0	chr6-167927525:167927675	chr6	167927525	167927675	chr6	167927525	167927591	FOXA1,HNF4A,USF1	chr6	167926775	167927059	chr6	167926775
chr6	168632627	168634997	0.263068872443873	-0.330345640030332	0.835585585585586	0.586754241926655	0.546555386721307	0.894945957437554	61	9.64990673489289e-14	chr6	168630535	168639704	Intron1	+	RP11-503C24.3	lincRNA	chr6	168632627	168634997	1	0.25847965972298	CpG: 18	chr6	168633706	168633918	chr6	168633706	168633918	*	*	*	*	*	0	0	chr6-168634165:168634475	chr6	168634165	168634475	chr6	168634165	168634475	CTCF,L3MBTL2,RAD21,MNT,ZNF444,NFXL1	chr6	168634067	168634973	chr6	168634067
chr6	169239907	169244659	0.273674636174636	-0.33313971245901	0.830459770114943	0.512854317732367	0.500979375934018	0.838904326365379	199	1.11192724238304e-38	*	*	*	InterGenic	*	*	*	*	*	*	*	*	CpG: 29	chr6	169242757	169243171	chr6	169242757	169243171	*	*	*	*	*	0	0	chr6-169244385:169244695	chr6	169244385	169244695	chr6	169244385	169244659	MNT,CREB1	chr6	169242571	169243293	chr6	169242571
chr6	170461815	170463562	0.20375213923601	-0.33119325758534	0.851851851851852	0.630075187969925	0.533305183828229	0.869904888782773	57	9.2282396599193e-12	*	*	*	InterGenic	*	*	*	*	*	*	*	*	*	*	*	*	*	0	0	chr6:170463024-170463652	chr6	170463024	170463652	chr6	170463024	170463562	chr6-170463105:170463590	chr6	170463105	170463590	chr6	170463105	170463562	CTCF,RAD21,GABPA	chr6	170463210	170463727	chr6	170463210
chr6	170528421	170530969	0.261690261690262	-0.415522050123709	0.875	0.608695652173913	0.488127152574831	0.924080496301563	138	1.67105832968539e-42	*	*	*	InterGenic	*	*	*	*	*	*	*	*	CpG: 68	chr6	170529588	170530672	chr6	170529588	170530672	*	*	*	*	*	0	0	chr6-170529860:170530075	chr6	170529860	170530075	chr6	170529860	170530075	ZNF444,NFXL1	chr6	170530351	170530807	chr6	170530351
chr6	170801543	170809850	0.238471673254281	0.0270512148954599	0.594594594594595	0.339622641509434	0.848813114890339	0.850786626145995	106	7.67319544995549e-14	*	*	*	InterGenic	*	*	*	*	*	*	*	*	*	*	*	*	*	0	0	*	*	*	*	*	0	0	chr6-170809345:170809715	chr6	170809345	170809715	chr6	170809345	170809715	MNT	chr6	170809500	170809884	chr6	170809500
chr7	343549	343671	-0.21875	0.0945984088745849	0.5625	0.8125	0.789507509242735	0.72088137268242	8	0.164918414918415	*	*	*	InterGenic	*	*	*	*	*	*	*	*	*	*	*	*	*	0	0	*	*	*	*	*	0	0	chr7-343105:343635	chr7	343105	343635	chr7	343549	343635	*	*	*	*	*	0
chr7	400933	402728	0.230502136752137	-0.00540331377435349	0.550480769230769	0.304398148148148	0.766663910229522	0.755847126303942	61	6.56460477529077e-11	*	*	*	InterGenic	*	*	*	*	*	*	*	*	*	*	*	*	*	0	0	*	*	*	*	*	0	0	chr7-401145:401295	chr7	401145	401295	chr7	401145	401295	EZH2,HNRNPL,EGR1	chr7	399967	401472	chr7	400933
chr7	496423	499145	0.221364221364221	-0.237517445718059	0.75	0.513513513513513	0.659699297044935	0.921567555280279	52	3.15164205988411e-09	*	*	*	InterGenic	*	*	*	*	*	*	*	*	*	*	*	*	*	0	0	*	*	*	*	*	0	0	chr7-497165:497315	chr7	497165	497315	chr7	497165	497315	RBM39,NR2F6,POLR2G	chr7	497330	498373	chr7	497330
chr7	1226258	1233542	0.2158357771261	-0.192120210749311	0.777777777777778	0.515763546798029	0.702340975840435	0.881600932506359	165	7.2468384039781e-21	*	*	*	InterGenic	*	*	*	*	*	*	*	*	*	*	*	*	*	0	0	*	*	*	*	*	0	0	chr7-1226860:1227055	chr7	1226860	1227055	chr7	1226860	1227055	EZH2	chr7	1226151	1227265	chr7	1226258
chr7	1233549	1233779	0.272089761570828	0.407729487743731	0.333333333333333	0.0740740740740741	0.806320398522657	0.327785251660562	16	4.01203389761155e-05	*	*	*	InterGenic	*	*	*	*	*	*	*	*	*	*	*	*	*	0	0	*	*	*	*	*	0	0	chr7-1233525:1233830	chr7	1233525	1233830	chr7	1233549	1233779	CTCF,ZNF444,SIN3A,MAX,MXI1,RAD21,MYC,TBP,FOXA1,SREBF1,SMC3,GABPA,HNRNPL,ZNF687,TRIM22,REST	chr7	1233202	1234155	chr7	1233549
chr7	1233833	1237724	0.326164874551972	-0.17437209710548	0.8	0.428571428571429	0.666343277232063	0.861420741771777	80	2.23473081180778e-18	*	*	*	InterGenic	*	*	*	*	*	*	*	*	*	*	*	*	*	0	0	*	*	*	*	*	0	0	chr7-1234025:1234175	chr7	1234025	1234175	chr7	1234025	1234175	CTCF,ZNF444,SIN3A,MAX,MXI1,RAD21,MYC,TBP,FOXA1,SREBF1,SMC3,GABPA,HNRNPL,ZNF687,TRIM22,REST	chr7	1233202	1234155	chr7	1233833
chr7	1238315	1242399	0.209615384615385	-0.246271279816446	0.8	0.564102564102564	0.625647832029149	0.877703205130584	117	1.64168457684854e-16	*	*	*	InterGenic	*	*	*	*	*	*	*	*	*	*	*	*	*	0	0	*	*	*	*	*	0	0	chr7-1239705:1240135	chr7	1239705	1240135	chr7	1239705	1240135	FOS,CEBPB,DACH1,MITF	chr7	1237996	1239239	chr7	1238315
chr7	1268753	1269687	0.2125	-0.190205088075158	0.764705882352941	0.548387096774194	0.591185754091728	0.784431565629241	82	1.15212033921635e-17	*	*	*	InterGenic	*	*	*	*	*	*	*	*	CpG: 923	chr7	1269165	1282864	chr7	1269165	1269687	*	*	*	*	*	0	0	chr7-1268645:1268795	chr7	1268645	1268795	chr7	1268753	1268795	EZH2,CTCF,RAD21,REST,TRIM22,SUZ12,SMC3,ESRRA,RNF2,HDAC2,KDM4A,ASH2L,EGR1,SMARCA4,ZNF24,CHD7,ZFP91,CTCF,RBM39,NRF1,UBTF,SIN3A,ZBTB7A,SMC3,RAD21,ZFP91,HNRNPK,XRCC5,MYC,GABPA,SUZ12,ZNF143,YY1,RB1,ARID2,REST,CBX8,RNF2,ZBTB33,SMARCA4,ZFX,RNF2,L3MBTL2,ASH2L,CHD1,IKZF1,SPI1,KDM1A,ETS1,SP1,GABPA,ZNF143,EP300,EGR1,HDAC6,TCF12,SMARCA4,YY1,CHD7,SMARCA4,HNRNPK,CBX2,ZFX,SUZ12,RNF2,CHD1,EGR1,PCBP1,HNRNPK,SUZ12…	chr7	1262564	1288876	chr7	1268753
chr7	1967173	1972953	0.240740740740741	-0.398303502511951	0.916666666666667	0.636363636363636	0.403342838011587	0.813689528651812	230	1.24719178688154e-60	chr7	1938027	1976322	Intron17	-	MAD1L1	protein_coding	chr7	1967173	1972953	1	0.15093354223789	CpG: 26	chr7	1967664	1967994	chr7	1967664	1967994	chr7:1968189-1968469	chr7	1968189	1968469	chr7	1968189	1968469	chr7-1967380:1967830	chr7	1967380	1967830	chr7	1967380	1967830	POLR2G,MYC,DPF2,POLR2A,REST,RXRA,SIN3A,GATA3,HNRNPL,HNF4A,MNT,RAD21,EGR1,ZNF687,CLOCK,FOXA2,FOXA1,SMARCE1,RAD51,SP1,CREB1,MYC,MAX,ZNF507,CTCF,ZNF444	chr7	1967500	1969151	chr7	1967500
chr7	4844453	4851210	0.277777777777778	-0.458385113151245	0.916666666666667	0.608695652173913	0.413982010735349	0.860379699399717	232	1.58118900199893e-56	chr7	4843386	4845196	Intron10	-	RADIL	protein_coding	chr7	4844453	4845196	0.109960041438508	0.410497237569061	*	*	*	*	*	0	0	*	*	*	*	*	0	0	chr7-4844805:4844955	chr7	4844805	4844955	chr7	4844805	4844955	TFAP4,CBFA2T3,TCF12,FOS,MTA1,NFE2,FOSL2,CBFA2T2,CTBP1,GATA3,PKNOX1,MEIS2	chr7	4845073	4845939	chr7	4845073
chr7	4844453	4851210	0.277777777777778	-0.458385113151245	0.916666666666667	0.608695652173913	0.413982010735349	0.860379699399717	232	1.58118900199893e-56	chr7	4845197	4845347	Exon10	-	RADIL	protein_coding	chr7	4845197	4845347	0.0221992008287702	1	*	*	*	*	*	0	0	*	*	*	*	*	0	0	chr7-4845005:4845830	chr7	4845005	4845830	chr7	4845197	4845347	TFAP4,CBFA2T3,TCF12,FOS,MTA1,NFE2,FOSL2,CBFA2T2,CTBP1,GATA3,PKNOX1,MEIS2	chr7	4845073	4845939	chr7	4845197
chr7	4844453	4851210	0.277777777777778	-0.458385113151245	0.916666666666667	0.608695652173913	0.413982010735349	0.860379699399717	232	1.58118900199893e-56	chr7	4845348	4854908	Intron9	-	RADIL	protein_coding	chr7	4845348	4851210	0.867544768388338	0.613179916317992	CpG: 68	chr7	4848251	4849204	chr7	4848251	4849204	chr7:4848839-4849223	chr7	4848839	4849223	chr7	4848839	4849223	chr7-4845005:4845830	chr7	4845005	4845830	chr7	4845348	4845830	TFAP4,CBFA2T3,TCF12,FOS,MTA1,NFE2,FOSL2,CBFA2T2,CTBP1,GATA3,PKNOX1,MEIS2	chr7	4845073	4845939	chr7	4845348
chr7	45648199	45650443	0.2375	-0.514301058551757	0.933333333333333	0.696969696969697	0.346306865010531	0.824357471457698	40	1.5044824644116e-12	chr7	45632508	45649977	Intron2	+	ADCY1	protein_coding	chr7	45648199	45649977	0.792335115864528	0.101780296525273	*	*	*	*	*	0	0	*	*	*	*	*	0	0	chr7-45647985:45648255	chr7	45647985	45648255	chr7	45648199	45648255	CTCF	chr7	45649675	45649865	chr7	45649675
chr7	45648199	45650443	0.2375	-0.514301058551757	0.933333333333333	0.696969696969697	0.346306865010531	0.824357471457698	40	1.5044824644116e-12	chr7	45649978	45650096	Exon3	+	ADCY1	protein_coding	chr7	45649978	45650096	0.0525846702317291	1	*	*	*	*	*	0	0	*	*	*	*	*	0	0	chr7-45649985:45650395	chr7	45649985	45650395	chr7	45649985	45650096	*	*	*	*	*	0
chr7	45648199	45650443	0.2375	-0.514301058551757	0.933333333333333	0.696969696969697	0.346306865010531	0.824357471457698	40	1.5044824644116e-12	chr7	45650097	45662230	Intron3	+	ADCY1	protein_coding	chr7	45650097	45650443	0.154188948306595	0.0285172669578835	*	*	*	*	*	0	0	*	*	*	*	*	0	0	chr7-45649985:45650395	chr7	45649985	45650395	chr7	45650097	45650395	*	*	*	*	*	0
chr7	50849821	50850999	0.345454545454545	-0.246207868194655	0.882352941176471	0.533333333333333	0.412213580647056	0.673547875732923	126	3.79679990347719e-41	chr7	50823754	50860920	Intron1	-	GRB10	protein_coding	chr7	50849821	50850999	1	0.0316956357961578	CpG: 118	chr7	50849752	50850871	chr7	50849821	50850871	*	*	*	*	*	0	0	chr7-50848925:50849970	chr7	50848925	50849970	chr7	50849821	50849970	EGR1,EZH2,FOXA1,CTCF,PHF8,ZFX,POLR2A,SMARCA4,MYC,SMC3,KDM4A,SIN3A,RAD21,REST,RBFOX2,POLR2G,MXI1,RBM22,NFXL1,TAF1,ZNF444,KDM1A,EP300,USF2,USF1,BMI1,RFX1,SUZ12,ZNF579,NR3C1,SMARCA4,ZBTB33,EZH2,IKZF1,FOXP1,FOXA1	chr7	50849085	50851422	chr7	50849821
chr7	51452068	51459513	0.205970655806183	-0.37182680903573	0.883484162895928	0.666666666666667	0.440535652796116	0.8336365183595	239	1.41348121215434e-46	*	*	*	InterGenic	*	*	*	*	*	*	*	*	CpG: 17	chr7	51454273	51454504	chr7	51454273	51454504	*	*	*	*	*	0	0	chr7-51452145:51452295	chr7	51452145	51452295	chr7	51452145	51452295	ZFX	chr7	51457261	51457941	chr7	51457261
chr7	55808964	55814839	0.201351351351351	-0.320015150344059	0.857142857142857	0.65625	0.530639062229566	0.853566117222464	236	2.13521532974668e-39	*	*	*	InterGenic	*	*	*	*	*	*	*	*	CpG: 20	chr7	55808712	55809001	chr7	55808964	55809001	*	*	*	*	*	0	0	chr7-55810885:55811050	chr7	55810885	55811050	chr7	55810885	55811050	CTCF,LCORL,ZFX	chr7	55807427	55809497	chr7	55808964
chr7	56878684	56896113	0.3	0.170626558076707	0.548387096774194	0.224489795918367	0.852018070137778	0.684174740487452	848	3.48512454094916e-166	*	*	*	InterGenic	*	*	*	*	*	*	*	*	CpG: 19	chr7	56880491	56880713	chr7	56880491	56880713	*	*	*	*	*	0	0	chr7-56878645:56878795	chr7	56878645	56878795	chr7	56878684	56878795	CTCF	chr7	56893792	56894319	chr7	56893792
chr7	63216005	63221182	0.268954056695992	0.232178801411646	0.447222222222222	0.153846153846154	0.815875830066033	0.581690765205181	253	9.07663773473046e-48	*	*	*	InterGenic	*	*	*	*	*	*	*	*	CpG: 30	chr7	63216954	63217363	chr7	63216954	63217363	*	*	*	*	*	0	0	*	*	*	*	*	0	0	*	*	*	*	*	0
chr7	63221355	63225181	0.234821428571428	0.130395506125214	0.458041958041958	0.2	0.766632130389297	0.643826445187717	185	1.16317936184483e-23	*	*	*	InterGenic	*	*	*	*	*	*	*	*	CpG: 31	chr7	63222279	63222688	chr7	63222279	63222688	*	*	*	*	*	0	0	*	*	*	*	*	0	0	*	*	*	*	*	0
chr7	64953965	64955410	0.303043393769666	-0.269285293007912	0.779513888888889	0.463265306122449	0.6480384722714	0.92571940321493	43	1.64071802095334e-09	*	*	*	InterGenic	*	*	*	*	*	*	*	*	*	*	*	*	*	0	0	*	*	*	*	*	0	0	chr7-64954300:64954610	chr7	64954300	64954610	chr7	64954300	64954610	*	*	*	*	*	0
chr7	77324377	77324679	0.274358974358975	0.117838065404861	0.551724137931034	0.266666666666667	0.839204822245024	0.721795324641042	18	0.00018571552914016	chr7	77288636	77325212	Intron1	-	RSBN1L-AS1	lincRNA	chr7	77324377	77324679	1	0.00825678040244969	*	*	*	*	*	0	0	*	*	*	*	*	0	0	*	*	*	*	*	0	0	RBBP5,NR2F6,ZBTB7A,FOXA2,CBFA2T3,TAL1,RBFOX2,C11orf30,ZNF316,HMBOX1,SMARCA4,ATF2,NR2F1,NR2F6,REST,PRDM10,TRIM28,ZNF384,NRF1,MIER1,CC2D1A,ZEB2,RNF2,CDC5L,ZSCAN29,MGA,L3MBTL2,KDM1A,MITF,CHD4,DPF2,RNF2,GMEB1,MGA,BCOR,MLLT1,L3MBTL2,SMARCC2,SMARCA4,ZBTB40,ARNT,MITF,REST,ZNF579,IKZF2,NBN,IKZF1,CC2D1A,RELB,STAT3,FOXM1,STAT5A,ASH2L,ZBTB2,SMARCE1,GATAD2B,MEF2B,POLR2A,MTA2,SAP30,KDM5A,RBFOX2,PHF8,TBL1XR1,M…	chr7	77322308	77329631	chr7	77324377
chr7	100640159	100649644	0.202272727272727	-0.092144848168778	0.636363636363636	0.407079646017699	0.806320398522657	0.913858842255742	214	1.54342921290932e-20	chr7	100633866	100648800	Exon5	+	MUC12	protein_coding	chr7	100640159	100648800	0.911017395888245	0.578612561939199	*	*	*	*	*	0	0	*	*	*	*	*	0	0	chr7-100648525:100648935	chr7	100648525	100648935	chr7	100648525	100648800	MCM3	chr7	100645629	100645959	chr7	100645629
chr7	100640159	100649644	0.202272727272727	-0.092144848168778	0.636363636363636	0.407079646017699	0.806320398522657	0.913858842255742	214	1.54342921290932e-20	chr7	100648801	100649751	Intron5	+	MUC12	protein_coding	chr7	100648801	100649644	0.0888771744860306	0.887368421052632	*	*	*	*	*	0	0	*	*	*	*	*	0	0	chr7-100649465:100649615	chr7	100649465	100649615	chr7	100649465	100649615	*	*	*	*	*	0
chr7	120418174	120423400	0.214587737843552	-0.405389071409053	0.884615384615385	0.657894736842105	0.416486759973873	0.862299156782566	84	2.30132720927159e-20	*	*	*	InterGenic	*	*	*	*	*	*	*	*	*	*	*	*	*	0	0	chr7:120422644-120422993	chr7	120422644	120422993	chr7	120422644	120422993	chr7-120421140:120421375	chr7	120421140	120421375	chr7	120421140	120421375	MCM7,ATF7,ATF2	chr7	120422176	120422868	chr7	120422176
chr7	128469890	128470558	0.207453416149069	0.03998896652452	0.576923076923077	0.314285714285714	0.688989594349153	0.678117968339176	60	7.56541229878878e-08	chr7	128469430	128470430	Promoter	+	FLNC	protein_coding	chr7	128469890	128470430	0.808383233532934	0.54	*	*	*	*	*	0	0	*	*	*	*	*	0	0	chr7-128470205:128470655	chr7	128470205	128470655	chr7	128470205	128470430	AGO1,HNRNPLL,KDM5B,ARNT,POLR2A,TRIM28,EP400,HDAC2,PML,NCOR1,ZEB2,ATF3,ZFX,E4F1,PHF8,AFF1,ATF4,RBFOX2,KLF16,ARID1B,ZNF282,TCF12,TAL1,DPF2,SMARCA4,NR2F2,LEF1,SREBF1,STAT5A,SMARCC2,RNF2,BRD9,HES1,NBN,HDAC1,SOX6,CBFA2T3,MYC,KDM4B,WHSC1,FOXK2,NCOA1,ZNF316,NEUROD1,REST,ZBTB7A,MTA3,TRIM24,ATF7,ZNF24,RBM39,MITF,GMEB1,CBFA2T2,RUNX1,MGA,CTBP1,POLR2G,SMARCE1,DACH1,CBX3,ETS1,GATAD2A,RBM22,ATF2,NR2F1,RBBP5,RL…	chr7	128466075	128474420	chr7	128469890
chr7	128469890	128470558	0.207453416149069	0.03998896652452	0.576923076923077	0.314285714285714	0.688989594349153	0.678117968339176	60	7.56541229878878e-08	chr7	128470431	128471043	FirstExon	+	FLNC	protein_coding	chr7	128470431	128470558	0.190119760479042	0.207516339869281	CpG: 69	chr7	128470443	128471161	chr7	128470443	128470558	*	*	*	*	*	0	0	chr7-128470205:128470655	chr7	128470205	128470655	chr7	128470431	128470558	AGO1,HNRNPLL,KDM5B,ARNT,POLR2A,TRIM28,EP400,HDAC2,PML,NCOR1,ZEB2,ATF3,ZFX,E4F1,PHF8,AFF1,ATF4,RBFOX2,KLF16,ARID1B,ZNF282,TCF12,TAL1,DPF2,SMARCA4,NR2F2,LEF1,SREBF1,STAT5A,SMARCC2,RNF2,BRD9,HES1,NBN,HDAC1,SOX6,CBFA2T3,MYC,KDM4B,WHSC1,FOXK2,NCOA1,ZNF316,NEUROD1,REST,ZBTB7A,MTA3,TRIM24,ATF7,ZNF24,RBM39,MITF,GMEB1,CBFA2T2,RUNX1,MGA,CTBP1,POLR2G,SMARCE1,DACH1,CBX3,ETS1,GATAD2A,RBM22,ATF2,NR2F1,RBBP5,RL…	chr7	128466075	128474420	chr7	128470431
chr7	148026665	148028928	0.212903225806452	0	0.588235294117647	0.371428571428571	0.804362812141919	0.777537305927323	40	3.35105024007459e-06	chr7	147964219	148080740	Intron21	+	CNTNAP2	protein_coding	chr7	148026665	148028928	1	0.0194213918521125	*	*	*	*	*	0	0	chr7:148027495-148027904	chr7	148027495	148027904	chr7	148027495	148027904	chr7-148028680:148028975	chr7	148028680	148028975	chr7	148028680	148028928	PKNOX1,E4F1,NFIB,RAD51,EHMT2,ZNF316,MLLT1,MCM2,ZBTB5,ZNF184,ZNF639,NBN,FOXA1,TRIM22,POLR2A,MNT,ARID2,FOXK2,PLRG1,IKZF1,MCM3,PHB2,ATM,IRF5,GATAD2B,ARNT,ARHGAP35,HDAC1	chr7	148028378	148028982	chr7	148028378
chr7	155579375	155589313	0.212121212121212	-0.335088931444913	0.869565217391304	0.641025641025641	0.498688637181284	0.858640945061751	338	1.22304189322566e-59	*	*	*	InterGenic	*	*	*	*	*	*	*	*	CpG: 49	chr7	155589263	155589883	chr7	155589263	155589313	chr7:155580383-155580450	chr7	155580383	155580450	chr7	155580383	155580450	chr7-155588865:155589635	chr7	155588865	155589635	chr7	155588865	155589313	MCM2,TAF15,NR2F6,NR2F2,HNF4A,CTCF,TRIM22,PCBP1,SMC3,RAD21,ZNF143,HNRNPK,ZNF444,YY1,GABPA,ASH2L,SUZ12,EP300,JUND,REST,RB1	chr7	155588823	155590501	chr7	155588823
chr7	155681918	155690194	0.244019138755981	0.024908143631164	0.555555555555556	0.296296296296296	0.801879687409855	0.76515394807944	98	8.74984649356232e-11	*	*	*	InterGenic	*	*	*	*	*	*	*	*	*	*	*	*	*	0	0	*	*	*	*	*	0	0	chr7-155689885:155690035	chr7	155689885	155690035	chr7	155689885	155690035	MAFK,JUND,FOS,FOSL2,TCF7,MEF2A,FOXA1,TCF7L2	chr7	155689132	155689954	chr7	155689132
chr7	157890870	157892419	0.233333333333333	-0.176970157659029	0.681818181818182	0.470588235294118	0.705433201900565	0.86441277261498	76	4.46170838689202e-11	chr7	157874070	157903520	Intron9	-	PTPRN2	protein_coding	chr7	157890870	157892419	1	0.052597623089983	CpG: 62	chr7	157890656	157891557	chr7	157890870	157891557	*	*	*	*	*	0	0	chr7-157892305:157892655	chr7	157892305	157892655	chr7	157892305	157892419	TRIM28,ATF7,CREB1,PKNOX1,ATF2,NRF1,EP300,SMC3,MXI1,MEIS2,L3MBTL2	chr7	157890109	157891169	chr7	157890870
chr7	157933416	157933669	0.28525641025641	-0.277397802262707	0.875	0.564102564102564	0.542204823936727	0.849836001914073	16	0.00111261764859921	chr7	157931208	157959622	Intron5	-	PTPRN2	protein_coding	chr7	157933416	157933669	1	0.00890406137819385	*	*	*	*	*	0	0	*	*	*	*	*	0	0	chr7-157933645:157933875	chr7	157933645	157933875	chr7	157933645	157933669	*	*	*	*	*	0
chr7	157933680	157939398	0.255555555555556	0.216304436868214	0.4	0.135135135135135	0.718656034048636	0.541868399672315	188	1.81686700598203e-28	chr7	157931208	157959622	Intron5	-	PTPRN2	protein_coding	chr7	157933680	157939398	1	0.201238825930879	CpG: 18	chr7	157937614	157937841	chr7	157937614	157937841	*	*	*	*	*	0	0	chr7-157938745:157938895	chr7	157938745	157938895	chr7	157938745	157938895	ASH2L,NCOR1,CREM,ZHX2,TFAP4,ETV4,RXRA,SOX13,EP300,JUND,FOXA1,HNF4G,RBM39,TCF7,HNF4A,SP1,MITF	chr7	157935877	157937045	chr7	157935877
chr7	157939623	157941832	0.770363729508197	-0.174250142270595	0.928571428571429	0.15	0.328778363807715	0.508537240533846	108	1.2945869252612e-36	chr7	157931208	157959622	Intron5	-	PTPRN2	protein_coding	chr7	157939623	157941832	1	0.0777433659463645	*	*	*	*	*	0	0	*	*	*	*	*	0	0	chr7-157941625:157941915	chr7	157941625	157941915	chr7	157941625	157941832	MAX	chr7	157941527	157941923	chr7	157941527
chr7	157941865	157943565	0.514285714285714	0.576105364789246	0.6	0.0476190476190476	0.761386375950474	0.21340214445349	30	7.60685703311206e-11	chr7	157931208	157959622	Intron5	-	PTPRN2	protein_coding	chr7	157941865	157943565	1	0.0598296614345041	*	*	*	*	*	0	0	*	*	*	*	*	0	0	chr7-157942905:157943255	chr7	157942905	157943255	chr7	157942905	157943255	MAX	chr7	157941527	157941923	chr7	157941865
chr7	157943618	157944592	0.37525354969574	-0.127031586703358	0.727272727272727	0.32	0.622544630323737	0.799968233833969	26	2.52646670552578e-06	chr7	157931208	157959622	Intron5	-	PTPRN2	protein_coding	chr7	157943618	157944592	1	0.0342788766101218	*	*	*	*	*	0	0	chr7:157943729-157944143	chr7	157943729	157944143	chr7	157943729	157944143	chr7-157944385:157944555	chr7	157944385	157944555	chr7	157944385	157944555	HNRNPL,EZH2,TCF7,FOXA1	chr7	157943707	157944652	chr7	157943707
chr7	158066144	158067150	0.225581395348837	-0.252498985453042	0.80952380952381	0.575	0.659078481802769	0.92742819473334	64	1.11725874557527e-14	chr7	157997966	158282426	Intron2	-	PTPRN2	protein_coding	chr7	158066144	158067150	1	0.00353652534627013	*	*	*	*	*	0	0	*	*	*	*	*	0	0	chr7-158067100:158067435	chr7	158067100	158067435	chr7	158067100	158067150	SKI	chr7	158066445	158066834	chr7	158066445
chr7	158121285	158122690	0.243663594470046	0.078039827946884	0.514705882352941	0.245689655172414	0.764613351851493	0.700793600945239	45	3.47757358603856e-07	chr7	157997966	158282426	Intron2	-	PTPRN2	protein_coding	chr7	158121285	158122690	1	0.00493918301342895	*	*	*	*	*	0	0	*	*	*	*	*	0	0	chr7-158122325:158122615	chr7	158122325	158122615	chr7	158122325	158122615	RFX1	chr7	158122512	158122679	chr7	158122512
chr7	158152688	158153765	0.280303030303031	-0.517691625152063	0.928571428571429	0.636363636363636	0.288618872485741	0.829547821004797	42	2.40935632919816e-11	chr7	157997966	158282426	Intron2	-	PTPRN2	protein_coding	chr7	158152688	158153765	1	0.0037861210715039	*	*	*	*	*	0	0	*	*	*	*	*	0	0	chr7-158153680:158153835	chr7	158153680	158153835	chr7	158153680	158153765	*	*	*	*	*	0
chr7	158381104	158387652	0.20109439124487	-0.061482874771798	0.5625	0.358974358974359	0.729573958513622	0.794088619014939	120	1.37167900220861e-09	chr7	158380481	158381481	Promoter	-	PTPRN2	protein_coding	chr7	158381104	158381481	0.057574832009774	0.377	CpG: 152	chr7	158379328	158381221	chr7	158381104	158381221	*	*	*	*	*	0	0	chr7-158380825:158382215	chr7	158380825	158382215	chr7	158381104	158381481	EHMT2,CTCF,RUNX1,ZNF217,NR2F6,POLR2A,CTBP1,FOXA1,MYC,RXRA,ESRRA,FOXA2,RAD21,ETV4,TFAP4,SIN3A,HNRNPLL,EZH2,AGO2,REST,POLR2A,SMC3,MXI1,RAD21,YY1,AGO1,RBFOX2,ZBTB7A,SMC3,REST,PHF8,MXI1,EP300,SIN3A,CTCF,ZBTB7A,RAD21,POLR2A,MNT,YY1,ETS1,UBTF,MYC,E2F6,SMARCE1,MAX,ZNF143,CREM,THAP1,EGR1,RB1,IRF1,EZH2,RBFOX2,SUZ12,E2F6,NRF1,ZHX2,PRPF4,RBM14,HNRNPK,EGR1,AGO2,REST,ZBTB7A,ETS1,HNRNPL,PRPF4	chr7	158377978	158381989	chr7	158381104
chr7	158381104	158387652	0.20109439124487	-0.061482874771798	0.5625	0.358974358974359	0.729573958513622	0.794088619014939	120	1.37167900220861e-09	chr7	158382320	158383320	Promoter	+	LINC01022	antisense	chr7	158382320	158383320	0.15271838729383	1	*	*	*	*	*	0	0	*	*	*	*	*	0	0	chr7-158383025:158383815	chr7	158383025	158383815	chr7	158383025	158383320	MCM7,ZNF639,PCBP2,MCM5,RBM39,IKZF1,PCBP1,GATAD2B,ZNF444,MCM2,HDAC2,TCF12,ZKSCAN1,HNRNPK,ZNF512B,CTBP1,DPF2,EGR1,NCOA3,MTA3,ZNF207,ZFX,ZHX2,POLR2G,RBFOX2,HDAC1,YY1,TBL1XR1,NCOR1,XRCC5,ZNF217,KDM1A,CTCF,ZBTB7A,FOXA2,HDAC2,CHD4,HNF4A,TCF7,HNF1A,GATA4,SOX13,TFAP4,REST,FOXA1,ETS1,ETV4,JUND,ELF1,CEBPB,SP1,EHMT2,MNT,FOSL2,HNF4G,CTBP1,CREM,SKI,TCF12,EP300,ASH2L,FOXP1,FOXK2,NR2F6,ESRRA,RXRA,ZNF24,MYC,ZNF5…	chr7	158382215	158385651	chr7	158382320
chr7	158381104	158387652	0.20109439124487	-0.061482874771798	0.5625	0.358974358974359	0.729573958513622	0.794088619014939	120	1.37167900220861e-09	chr7	158383321	158383499	FirstExon	+	LINC01022	antisense	chr7	158383321	158383499	0.0271838729383018	1	*	*	*	*	*	0	0	*	*	*	*	*	0	0	chr7-158383025:158383815	chr7	158383025	158383815	chr7	158383321	158383499	MCM7,ZNF639,PCBP2,MCM5,RBM39,IKZF1,PCBP1,GATAD2B,ZNF444,MCM2,HDAC2,TCF12,ZKSCAN1,HNRNPK,ZNF512B,CTBP1,DPF2,EGR1,NCOA3,MTA3,ZNF207,ZFX,ZHX2,POLR2G,RBFOX2,HDAC1,YY1,TBL1XR1,NCOR1,XRCC5,ZNF217,KDM1A,CTCF,ZBTB7A,FOXA2,HDAC2,CHD4,HNF4A,TCF7,HNF1A,GATA4,SOX13,TFAP4,REST,FOXA1,ETS1,ETV4,JUND,ELF1,CEBPB,SP1,EHMT2,MNT,FOSL2,HNF4G,CTBP1,CREM,SKI,TCF12,EP300,ASH2L,FOXP1,FOXK2,NR2F6,ESRRA,RXRA,ZNF24,MYC,ZNF5…	chr7	158382215	158385651	chr7	158383321
chr7	158381104	158387652	0.20109439124487	-0.061482874771798	0.5625	0.358974358974359	0.729573958513622	0.794088619014939	120	1.37167900220861e-09	chr7	158383500	158383597	Intron1	+	LINC01022	antisense	chr7	158383500	158383597	0.0148136835675015	1	*	*	*	*	*	0	0	*	*	*	*	*	0	0	chr7-158383025:158383815	chr7	158383025	158383815	chr7	158383500	158383597	MCM7,ZNF639,PCBP2,MCM5,RBM39,IKZF1,PCBP1,GATAD2B,ZNF444,MCM2,HDAC2,TCF12,ZKSCAN1,HNRNPK,ZNF512B,CTBP1,DPF2,EGR1,NCOA3,MTA3,ZNF207,ZFX,ZHX2,POLR2G,RBFOX2,HDAC1,YY1,TBL1XR1,NCOR1,XRCC5,ZNF217,KDM1A,CTCF,ZBTB7A,FOXA2,HDAC2,CHD4,HNF4A,TCF7,HNF1A,GATA4,SOX13,TFAP4,REST,FOXA1,ETS1,ETV4,JUND,ELF1,CEBPB,SP1,EHMT2,MNT,FOSL2,HNF4G,CTBP1,CREM,SKI,TCF12,EP300,ASH2L,FOXP1,FOXK2,NR2F6,ESRRA,RXRA,ZNF24,MYC,ZNF5…	chr7	158382215	158385651	chr7	158383500
chr7	158381104	158387652	0.20109439124487	-0.061482874771798	0.5625	0.358974358974359	0.729573958513622	0.794088619014939	120	1.37167900220861e-09	chr7	158383598	158383812	LastExon	+	LINC01022	antisense	chr7	158383598	158383812	0.0326817348808797	1	*	*	*	*	*	0	0	*	*	*	*	*	0	0	chr7-158383025:158383815	chr7	158383025	158383815	chr7	158383598	158383812	MCM7,ZNF639,PCBP2,MCM5,RBM39,IKZF1,PCBP1,GATAD2B,ZNF444,MCM2,HDAC2,TCF12,ZKSCAN1,HNRNPK,ZNF512B,CTBP1,DPF2,EGR1,NCOA3,MTA3,ZNF207,ZFX,ZHX2,POLR2G,RBFOX2,HDAC1,YY1,TBL1XR1,NCOR1,XRCC5,ZNF217,KDM1A,CTCF,ZBTB7A,FOXA2,HDAC2,CHD4,HNF4A,TCF7,HNF1A,GATA4,SOX13,TFAP4,REST,FOXA1,ETS1,ETV4,JUND,ELF1,CEBPB,SP1,EHMT2,MNT,FOSL2,HNF4G,CTBP1,CREM,SKI,TCF12,EP300,ASH2L,FOXP1,FOXK2,NR2F6,ESRRA,RXRA,ZNF24,MYC,ZNF5…	chr7	158382215	158385651	chr7	158383598
chr7	158388251	158398424	0.225145180023229	-0.379431524445943	0.870833333333334	0.632862644415918	0.454458954120256	0.84878261585442	155	7.24028155512378e-36	*	*	*	InterGenic	*	*	*	*	*	*	*	*	*	*	*	*	*	0	0	*	*	*	*	*	0	0	chr7-158396705:158397375	chr7	158396705	158397375	chr7	158396705	158397375	POLR2G,POLR2A	chr7	158396596	158397391	chr7	158396596
chr7	158457305	158463036	0.263414634146341	-0.475703692453967	0.9375	0.673469387755102	0.307309364962454	0.815848654446466	86	1.69279739380641e-24	chr7	158457220	158457442	Exon14	-	NCAPG2	protein_coding	chr7	158457305	158457442	0.02390507764788	0.617117117117117	*	*	*	*	*	0	0	*	*	*	*	*	0	0	chr7-158457180:158457495	chr7	158457180	158457495	chr7	158457305	158457442	ZFX,EGR1	chr7	158456521	158457374	chr7	158457305
chr7	158457305	158463036	0.263414634146341	-0.475703692453967	0.9375	0.673469387755102	0.307309364962454	0.815848654446466	86	1.69279739380641e-24	chr7	158457443	158464205	Intron13	-	NCAPG2	protein_coding	chr7	158457443	158463036	0.975920432734252	0.82712215320911	*	*	*	*	*	0	0	*	*	*	*	*	0	0	chr7-158460865:158461115	chr7	158460865	158461115	chr7	158460865	158461115	POLR2A	chr7	158462940	158463470	chr7	158462940
chr7	158765441	158767863	0.221331194867682	-0.302641148174137	0.866666666666667	0.653846153846154	0.528394735462637	0.851678844192422	148	1.79227499556104e-27	*	*	*	InterGenic	*	*	*	*	*	*	*	*	CpG: 106	chr7	158766126	158767400	chr7	158766126	158767400	chr7:158765978-158766170	chr7	158765978	158766170	chr7	158765978	158766170	chr7-158767725:158767875	chr7	158767725	158767875	chr7	158767725	158767863	CTCF,ZFX,RFX1,CBFB,SIN3A,GMEB1,CREB1,RFX5,MNT,KDM4A,ZNF282,PHF8,ZNF579,ZBTB7A,ZBTB33,ATF7,GABPB1,MGA,RUNX3,MTA1,ZNF687,SOX6,REST,MYC,RAD21,TRIM22,EGR1,POLR2G,PKNOX1,RBFOX2,POLR2A,BHLHE40,MAX,RB1,CREM,MEIS2,SMC3,PHF20,ZNF143,HCFC1,L3MBTL2,SRF,HNRNPK,E2F6,PCBP1,TAF1,MAFK,ZBTB33,MAFF,HSF1	chr7	158765844	158767486	chr7	158765844
chr7	158789167	158790557	0.290865384615385	-0.362195273181356	0.857142857142857	0.53125	0.502147729273432	0.869948340710124	94	1.92127398129315e-22	*	*	*	InterGenic	*	*	*	*	*	*	*	*	CpG: 54	chr7	158789486	158790019	chr7	158789486	158790019	*	*	*	*	*	0	0	chr7-158790045:158790675	chr7	158790045	158790675	chr7	158790045	158790557	RNF2,SUZ12,KDM4A,EZH2,E2F6,ZBTB33	chr7	158789241	158790615	chr7	158789241
chr8	617828	623433	0.215052700922266	-0.449205342618302	0.916666666666667	0.718253968253968	0.300536499019676	0.734688889988484	67	3.05220446560021e-16	chr8	565285	618597	Intron3	-	ERICH1	protein_coding	chr8	617828	618597	0.137198929527208	0.0144245198079232	*	*	*	*	*	0	0	*	*	*	*	*	0	0	chr8-617505:617835	chr8	617505	617835	chr8	617828	617835	*	*	*	*	*	0
chr8	617828	623433	0.215052700922266	-0.449205342618302	0.916666666666667	0.718253968253968	0.300536499019676	0.734688889988484	67	3.05220446560021e-16	chr8	618598	618792	Exon3	-	ERICH1	protein_coding	chr8	618598	618792	0.0346119536128457	1	*	*	*	*	*	0	0	*	*	*	*	*	0	0	chr8-618485:618635	chr8	618485	618635	chr8	618598	618635	*	*	*	*	*	0
chr8	617828	623433	0.215052700922266	-0.449205342618302	0.916666666666667	0.718253968253968	0.300536499019676	0.734688889988484	67	3.05220446560021e-16	chr8	618793	623288	Intron2	-	ERICH1	protein_coding	chr8	618793	623288	0.801962533452275	1	CpG: 41	chr8	619097	619607	chr8	619097	619607	*	*	*	*	*	0	0	chr8-618685:619035	chr8	618685	619035	chr8	618793	619035	NR2F2,HNF4A,HNF4G	chr8	620549	621039	chr8	620549
chr8	617828	623433	0.215052700922266	-0.449205342618302	0.916666666666667	0.718253968253968	0.300536499019676	0.734688889988484	67	3.05220446560021e-16	chr8	623289	624047	Exon2	-	ERICH1	protein_coding	chr8	623289	623433	0.0256913470115968	0.189973614775726	CpG: 28	chr8	623372	623710	chr8	623372	623433	*	*	*	*	*	0	0	*	*	*	*	*	0	0	POLR2A	chr8	623328	623732	chr8	623328
chr8	1773057	1790020	0.203921078921079	-0.308840676976067	0.857142857142857	0.62962962962963	0.483412733347159	0.817072381437066	499	7.57225171573445e-72	chr8	1772280	1791518	Intron1	+	ARHGEF10	protein_coding	chr8	1773057	1790020	1	0.881744464081505	CpG: 16	chr8	1779620	1779821	chr8	1779620	1779821	chr8:1780723-1781665	chr8	1780723	1781665	chr8	1780723	1781665	chr8-1772905:1773275	chr8	1772905	1773275	chr8	1773057	1773275	RNF2,ZBTB33	chr8	1774337	1775247	chr8	1774337
chr8	1831814	1839037	0.236939531057178	-0.366493584886406	0.891812865497076	0.645	0.403819811066717	0.83352563377786	77	5.32284957517676e-16	chr8	1830916	1833766	Intron10	+	ARHGEF10	protein_coding	chr8	1831814	1833766	0.270247819465596	0.684912280701754	*	*	*	*	*	0	0	*	*	*	*	*	0	0	chr8-1832085:1832235	chr8	1832085	1832235	chr8	1832085	1832235	SPI1	chr8	1833383	1833653	chr8	1833383
chr8	1831814	1839037	0.236939531057178	-0.366493584886406	0.891812865497076	0.645	0.403819811066717	0.83352563377786	77	5.32284957517676e-16	chr8	1833767	1833873	Exon11	+	ARHGEF10	protein_coding	chr8	1833767	1833873	0.0146753426554063	1	*	*	*	*	*	0	0	*	*	*	*	*	0	0	*	*	*	*	*	0	0	*	*	*	*	*	0
chr8	1831814	1839037	0.236939531057178	-0.366493584886406	0.891812865497076	0.645	0.403819811066717	0.83352563377786	77	5.32284957517676e-16	chr8	1833874	1841734	Intron11	+	ARHGEF10	protein_coding	chr8	1833874	1839037	0.714799944621348	0.656870229007634	*	*	*	*	*	0	0	chr8:1836847-1837132	chr8	1836847	1837132	chr8	1836847	1837132	chr8-1834845:1834995	chr8	1834845	1834995	chr8	1834845	1834995	EP300	chr8	1834528	1835044	chr8	1834528
chr8	7137833	7138309	0.214285714285714	0.192589497761142	0.368421052631579	0.173913043478261	0.768345510859089	0.538001820951407	18	0.00798366148988985	*	*	*	InterGenic	*	*	*	*	*	*	*	*	*	*	*	*	*	0	0	*	*	*	*	*	0	0	*	*	*	*	*	0	0	*	*	*	*	*	0
chr8	8559486	8559722	-0.212554112554113	-0.239447001122608	0.181818181818182	0.454044117647059	0.389410964446271	0.736550624126592	29	2.70781568468645e-07	chr8	8559448	8561616	FirstExon	+	CLDN23	protein_coding	chr8	8559486	8559722	1	0.108856088560886	CpG: 166	chr8	8559131	8560867	chr8	8559486	8559722	*	*	*	*	*	0	0	chr8-8559080:8559530	chr8	8559080	8559530	chr8	8559486	8559530	YY1,REST,CTCF,NRF1,POLR2A,HDAC1,TAF1,RNF2,SMARCA4,SIN3A,HNRNPLL,ASH2L,IKZF1,RELB,SP1,ZNF316,HDAC2,NCOR1,ZBTB2,RAD21,RXRA,XRCC5,NR2F1,EGR1,NFYB,ELF1,ATF7,GABPB1,MTA3,ETV4,PRDM10,AGO1,NEUROD1,SOX6,PCBP1,PYGO2,SKI,ZNF143,TBP,NR2F2,SKIL,HNF4A,EZH2,MYC,IRF2,RBM39,HCFC1,EP300,ESRRA,POLR2G,FUS,RB1,GABPA,L3MBTL2,ZNF24,CTBP1,RBBP5,IRF1,MXI1,ZBTB7A,SPI1,RBFOX2,UBTF,KDM4A,ZNF639,MAX,HNRNPK,HNF4G,JUNB,E2F6,M…	chr8	8558467	8560723	chr8	8559486
chr8	9624467	9632573	0.221153846153846	-0.331760649911132	0.866666666666667	0.652173913043478	0.461477168113533	0.799247420285945	92	8.30211571750883e-21	chr8	9623936	9627615	Intron25	+	TNKS	protein_coding	chr8	9624467	9627615	0.388354305452751	0.855667300896983	*	*	*	*	*	0	0	*	*	*	*	*	0	0	chr8-9625620:9625770	chr8	9625620	9625770	chr8	9625620	9625770	MXI1,GATA2,GATA2,NFIC,NFIB	chr8	9625643	9626948	chr8	9625643
chr8	9624467	9632573	0.221153846153846	-0.331760649911132	0.866666666666667	0.652173913043478	0.461477168113533	0.799247420285945	92	8.30211571750883e-21	chr8	9627616	9627772	Exon26	+	TNKS	protein_coding	chr8	9627616	9627772	0.0192450037009623	1	*	*	*	*	*	0	0	*	*	*	*	*	0	0	*	*	*	*	*	0	0	*	*	*	*	*	0
chr8	9624467	9632573	0.221153846153846	-0.331760649911132	0.866666666666667	0.652173913043478	0.461477168113533	0.799247420285945	92	8.30211571750883e-21	chr8	9627773	9634159	Intron26	+	TNKS	protein_coding	chr8	9627773	9632573	0.592153960029608	0.751644221735045	*	*	*	*	*	0	0	*	*	*	*	*	0	0	chr8-9627925:9628110	chr8	9627925	9628110	chr8	9627925	9628110	PCBP2,KDM1A	chr8	9629362	9629856	chr8	9629362
chr8	10429978	10436272	0.201783230454654	-0.225815545636392	0.823529411764706	0.590909090909091	0.579403043544888	0.825345246965615	103	1.49961371887246e-12	*	*	*	InterGenic	*	*	*	*	*	*	*	*	*	*	*	*	*	0	0	*	*	*	*	*	0	0	chr8-10430380:10430610	chr8	10430380	10430610	chr8	10430380	10430610	ARID1B,DACH1,CBFA2T2,CBFA2T3,NCOR1,TAL1,TCF12	chr8	10429562	10430082	chr8	10429978
chr8	19459665	19460196	-0.263296596191333	-0.112648844233042	0.35	0.560386473429952	0.546433964660455	0.635980812026558	39	1.06816310498811e-11	chr8	19459377	19539983	Intron1	-	CSGALNACT1	protein_coding	chr8	19459665	19460196	1	0.00658759893804431	CpG: 27	chr8	19459905	19460137	chr8	19459905	19460137	*	*	*	*	*	0	0	chr8-19459625:19460135	chr8	19459625	19460135	chr8	19459665	19460135	SUZ12,CTCF,POLR2A,EZH2,MXI1,SIN3A,RAD21,RBM39,BHLHE40,SMC3,EP300,TCF12,KDM4A	chr8	19459285	19460475	chr8	19459665
chr8	24656760	24692174	0.216233766233766	0.0694985029943015	0.5	0.25	0.717017476788939	0.636121982931275	165	3.56376802376645e-21	chr8	24245505	24741514	Intron2	-	RP11-624C23.1	antisense	chr8	24656760	24692174	1	0.0713978980220117	*	*	*	*	*	0	0	*	*	*	*	*	0	0	chr8-24659200:24659350	chr8	24659200	24659350	chr8	24659200	24659350	SMARCA4	chr8	24661498	24661782	chr8	24661498
chr8	26670477	26690786	0.222672064777327	0.00111974593771402	0.538461538461538	0.285714285714286	0.680124464562832	0.67831363798541	126	7.84637672560795e-15	chr8	26628184	26721603	Intron1	-	ADRA1A	protein_coding	chr8	26670477	26690786	1	0.217396889283765	*	*	*	*	*	0	0	*	*	*	*	*	0	0	chr8-26673300:26673515	chr8	26673300	26673515	chr8	26673300	26673515	CTCF	chr8	26674102	26674332	chr8	26674102
chr8	26706178	26721387	0.208333333333333	-0.099439627893265	0.636363636363636	0.388888888888889	0.658312500400642	0.759933043945802	80	4.60571269199528e-11	chr8	26628184	26721603	Intron1	-	ADRA1A	protein_coding	chr8	26706178	26721387	1	0.16280414048534	*	*	*	*	*	0	0	chr8:26718570-26718842	chr8	26718570	26718842	chr8	26718570	26718842	chr8-26706320:26706555	chr8	26706320	26706555	chr8	26706320	26706555	SPI1	chr8	26706082	26706322	chr8	26706178
chr8	33421830	33423456	0.201923076923077	-0.110790356487572	0.590909090909091	0.375	0.673575926600262	0.758870290551468	44	3.9493564147315e-10	chr8	33416290	33424216	Intron1	-	RNF122	protein_coding	chr8	33421830	33423456	1	0.205147615442846	*	*	*	*	*	0	0	chr8:33422539-33422669	chr8	33422539	33422669	chr8	33422539	33422669	chr8-33422445:33423015	chr8	33422445	33423015	chr8	33422445	33423015	POLR2A,NBN,GATA2,MXI1,CREB1,ATF7,ATF2,SIN3A,RFX5,DPF2,FOS,EP300,JUND,GATAD2B,ATF3,E2F1,CREM,IKZF1,PKNOX1,RCOR1,NR2F2,REST,CEBPB,RXRA,ELF1,SP1,STAT3,RUNX3,IKZF2,EED,SPI1,CHD4,E2F6,ZBTB33,ZNF217,MLLT1,GATAD2B,EZH2,CTCF,IKZF1,MXI1,MNT,FOXA2,POLR2A,SKI,KDM5B,RAD21,BHLHE40,FOXA1,EED,YY1,SAP30,KDM4A,KDM5A,ASH2L,TCF7,HDAC2,EP300,TAF7,REST,SIN3B,TAF1,EGR1,SIN3A,E2F4,ZBTB40,PRDM10,PHF8,CREB3L1,RBFOX2,SMAR…	chr8	33422226	33425332	chr8	33422226
chr8	33479076	33481830	0.303334891693939	0.038453867590826	0.587121212121212	0.258661887694145	0.743019654355952	0.751613131946559	35	3.89737221328486e-08	*	*	*	InterGenic	*	*	*	*	*	*	*	*	*	*	*	*	*	0	0	*	*	*	*	*	0	0	chr8-33479345:33479670	chr8	33479345	33479670	chr8	33479345	33479670	POLR2A,RFX1,TAF7,YY1	chr8	33480414	33481058	chr8	33480414
chr8	37095456	37112524	0.213347069597069	-0.0340101080018465	0.566964285714285	0.319090909090909	0.67135779419608	0.709230428518706	131	5.55544298317186e-14	*	*	*	InterGenic	*	*	*	*	*	*	*	*	*	*	*	*	*	0	0	chr8:37100624-37100997	chr8	37100624	37100997	chr8	37100624	37100997	chr8-37097100:37097455	chr8	37097100	37097455	chr8	37097100	37097455	GATA3,FOXA1,GATA2	chr8	37097156	37097663	chr8	37097156
chr8	40961292	40975926	0.209770114942529	0.010194868183675	0.538461538461538	0.291666666666667	0.668295388030614	0.655256891379307	132	7.06289614809621e-13	*	*	*	InterGenic	*	*	*	*	*	*	*	*	*	*	*	*	*	0	0	*	*	*	*	*	0	0	chr8-40962600:40962910	chr8	40962600	40962910	chr8	40962600	40962910	CTCF,CBX3,TAF1,TBP,ZNF143,YY1,SMC3,ZNF574,RAD21,RAD21	chr8	40962234	40963749	chr8	40962234
chr8	41166555	41167277	0.22	-0.013609655275282	0.583333333333333	0.333333333333333	0.573976031629121	0.575226018415446	90	5.11101371442127e-24	chr8	41166135	41167016	FirstExon	-	SFRP1	protein_coding	chr8	41166555	41167016	0.638504155124654	0.523269012485812	CpG: 147	chr8	41165852	41167140	chr8	41166555	41167016	*	*	*	*	*	0	0	chr8-41165265:41167335	chr8	41165265	41167335	chr8	41166555	41167016	EZH2,C11orf30,MAFK,NFE2,SIN3A,CTCF,USF1,SAP30,SMC3,SIN3A,TBP,ZNF143,RAD21,CHD1,HDAC2,EZH2,NANOG,TBP,CHD1,CTCF,TAF1,RBBP5,ZEB1,SUZ12,RAD21,BHLHE40,USF1,MXI1,ASH2L,SIN3A,KDM4A,MYC,SAP30,BACH1,NR3C1,MXI1,PHF8,POLR2A,TAF7,TAF1,SP1,RAD21,CTCF,PKNOX1,TBP,RFX5,RBBP5,SUZ12,HNF4A,CTCF,EZH2,ASH2L,SIN3A,TAF7,SP1,NANOG,CTCF,HNF4A,HNF4G,RAD21,SMC3	chr8	41163140	41169785	chr8	41166555
chr8	41166555	41167277	0.22	-0.013609655275282	0.583333333333333	0.333333333333333	0.573976031629121	0.575226018415446	90	5.11101371442127e-24	chr8	41167017	41168017	Promoter	-	SFRP1	protein_coding	chr8	41167017	41167277	0.3601108033241	0.26	CpG: 147	chr8	41165852	41167140	chr8	41167017	41167140	*	*	*	*	*	0	0	chr8-41165265:41167335	chr8	41165265	41167335	chr8	41167017	41167277	EZH2,C11orf30,MAFK,NFE2,SIN3A,CTCF,USF1,SAP30,SMC3,SIN3A,TBP,ZNF143,RAD21,CHD1,HDAC2,EZH2,NANOG,TBP,CHD1,CTCF,TAF1,RBBP5,ZEB1,SUZ12,RAD21,BHLHE40,USF1,MXI1,ASH2L,SIN3A,KDM4A,MYC,SAP30,BACH1,NR3C1,MXI1,PHF8,POLR2A,TAF7,TAF1,SP1,RAD21,CTCF,PKNOX1,TBP,RFX5,RBBP5,SUZ12,HNF4A,CTCF,EZH2,ASH2L,SIN3A,TAF7,SP1,NANOG,CTCF,HNF4A,HNF4G,RAD21,SMC3	chr8	41163140	41169785	chr8	41167017
chr8	42755478	42759748	0.212572866984632	-0.219066904739683	0.8	0.53950103950104	0.580501390783735	0.828055226780526	81	1.22520470038e-11	chr8	42752332	42761315	Intron1	+	HOOK3	protein_coding	chr8	42755478	42759748	1	0.475342313258377	*	*	*	*	*	0	0	*	*	*	*	*	0	0	chr8-42755765:42755915	chr8	42755765	42755915	chr8	42755765	42755915	ZNF316,EP300,PKNOX1,POLR2A	chr8	42754593	42755533	chr8	42755478
chr8	47529009	47529657	0.201830663615561	0.131417911472314	0.458333333333333	0.260869565217391	0.683504085668136	0.53751607118115	47	3.9330521078227e-10	*	*	*	InterGenic	*	*	*	*	*	*	*	*	CpG: 41	chr8	47528989	47529374	chr8	47529009	47529374	*	*	*	*	*	0	0	chr8-47528945:47529415	chr8	47528945	47529415	chr8	47529009	47529415	RBFOX2,ZBTB33,UBTF,RBFOX2,E2F6,MYNN,POLR2G,NRF1,CREB3L1,POLR2A,MTA3,EP400,DPF2,KDM5B,PCBP1,HDAC1,RBM22,RNF2,ATF4,ARID1B,FIP1L1,EGR1,SOX6,MGA,ESRRA,GMEB1,NFIC,PHF8,CBX1,MYC,CLOCK,L3MBTL2,MNT,RB1,SMAD5,ATF3,TRIM24,SMARCA4,PHF20,GABPB1,U2AF1,GATAD2A,MAX,PRPF4,JUN,ATF2,CTBP1,ATF7,EP300,E2F6,BHLHE40,JUND,CEBPB	chr8	47527504	47529681	chr8	47529009
chr8	49647578	49648167	0.261904761904762	0.005033734222747	0.583333333333333	0.323529411764706	0.680124464562832	0.629117271481665	46	5.39222548595059e-11	chr8	49647244	49647652	Intron1	-	EFCAB1	protein_coding	chr8	49647578	49647652	0.125636672325976	0.181372549019608	*	*	*	*	*	0	0	*	*	*	*	*	0	0	chr8-49647465:49647715	chr8	49647465	49647715	chr8	49647578	49647652	KDM4A,MXI1,ZBTB7A,POLR2A,RAD21,SMC3,RFX1,CTCF,EP300,ZNF143,YY1,ZBTB33,JUND,ATF3,MAX,RXRA,NR2F2,FOXA2,SP1,RAD21,HNF4A	chr8	49647341	49648921	chr8	49647578
chr8	49647578	49648167	0.261904761904762	0.005033734222747	0.583333333333333	0.323529411764706	0.680124464562832	0.629117271481665	46	5.39222548595059e-11	chr8	49647653	49647793	FirstExon	-	EFCAB1	protein_coding	chr8	49647653	49647793	0.237691001697793	1	CpG: 37	chr8	49647702	49647988	chr8	49647702	49647793	*	*	*	*	*	0	0	chr8-49647465:49647715	chr8	49647465	49647715	chr8	49647653	49647715	KDM4A,MXI1,ZBTB7A,POLR2A,RAD21,SMC3,RFX1,CTCF,EP300,ZNF143,YY1,ZBTB33,JUND,ATF3,MAX,RXRA,NR2F2,FOXA2,SP1,RAD21,HNF4A	chr8	49647341	49648921	chr8	49647653
chr8	49647578	49648167	0.261904761904762	0.005033734222747	0.583333333333333	0.323529411764706	0.680124464562832	0.629117271481665	46	5.39222548595059e-11	chr8	49647794	49648794	Promoter	-	EFCAB1	protein_coding	chr8	49647794	49648167	0.633276740237691	0.373	CpG: 37	chr8	49647702	49647988	chr8	49647794	49647988	*	*	*	*	*	0	0	chr8-49647765:49648015	chr8	49647765	49648015	chr8	49647794	49648015	KDM4A,MXI1,ZBTB7A,POLR2A,RAD21,SMC3,RFX1,CTCF,EP300,ZNF143,YY1,ZBTB33,JUND,ATF3,MAX,RXRA,NR2F2,FOXA2,SP1,RAD21,HNF4A	chr8	49647341	49648921	chr8	49647794
chr8	52606201	52627855	0.217391304347826	-0.028825073102795	0.6	0.318181818181818	0.680124464562832	0.673927407199933	108	5.44035642796478e-09	chr8	52567321	52721740	Intron1	-	PXDNL	protein_coding	chr8	52606201	52627855	1	0.140228857847804	*	*	*	*	*	0	0	*	*	*	*	*	0	0	chr8-52612460:52612710	chr8	52612460	52612710	chr8	52612460	52612710	RAD51,MITF	chr8	52606913	52607372	chr8	52606913
chr8	53274248	53311337	0.221804511278196	0.0124646846404991	0.571428571428571	0.310344827586207	0.680124464562832	0.652847660626768	292	5.166449798099e-30	chr8	53142638	53321887	Intron2	-	ST18	protein_coding	chr8	53274248	53311337	1	0.206913288219181	*	*	*	*	*	0	0	chr8:53288358-53288826	chr8	53288358	53288826	chr8	53288358	53288826	chr8-53275125:53275275	chr8	53275125	53275275	chr8	53275125	53275275	JUND	chr8	53276629	53276899	chr8	53276629
chr8	55460903	55462658	0.221153846153846	-0.369080613762775	0.857142857142857	0.580645161290323	0.517032723669088	0.896142523273824	38	1.59287473332913e-06	*	*	*	InterGenic	*	*	*	*	*	*	*	*	*	*	*	*	*	0	0	*	*	*	*	*	0	0	chr8-55462365:55462515	chr8	55462365	55462515	chr8	55462365	55462515	*	*	*	*	*	0
chr8	55475157	55488899	0.237536656891495	-0.10178196341401	0.647058823529412	0.357142857142857	0.640395165529518	0.752302996519451	112	3.16838223607786e-11	*	*	*	InterGenic	*	*	*	*	*	*	*	*	*	*	*	*	*	0	0	*	*	*	*	*	0	0	chr8-55475685:55475995	chr8	55475685	55475995	chr8	55475685	55475995	POLR2A,RFX1,FOS	chr8	55475471	55476071	chr8	55475471
chr8	57069543	57070216	-0.217241379310345	-0.239197279441323	0.285714285714286	0.518518518518518	0.431820614746107	0.704928993085604	58	6.05259885019951e-19	*	*	*	InterGenic	*	*	*	*	*	*	*	*	CpG: 44	chr8	57069687	57070047	chr8	57069687	57070047	*	*	*	*	*	0	0	chr8-57068965:57070055	chr8	57068965	57070055	chr8	57069543	57070055	SMARCA4,RNF2,RNF2,CHD7,HDAC2,NANOG,TBP,EZH2,CBX2,SUZ12,ASH2L,POLR2A,TAF15,HNRNPLL,TAF1,XRCC5,KDM4A,AGO2,CTCF,TBP,ZNF143,TCF12,FOSL2,EP300,RFX5,RAD21,HNRNPK	chr8	57067664	57070814	chr8	57069543
chr8	65493355	65493802	0.333333333333333	0.0177448923580911	0.727272727272727	0.357142857142857	0.626654982909037	0.636347012027247	50	6.8405621539482e-13	chr8	65489186	65494274	Intron1	-	RP11-21C4.1	antisense	chr8	65493355	65493802	1	0.0878537735849057	CpG: 143	chr8	65492935	65494452	chr8	65493355	65493802	*	*	*	*	*	0	0	chr8-65493140:65493675	chr8	65493140	65493675	chr8	65493355	65493675	CTCF,HNF4G,TRIM22,SMC3,ATF2,RAD21,IKZF1,C11orf30,ZNF316,NFIC,MAFK,REST,IKZF2,MAFF,YY1,SKIL,TCF12,ZNF143,RUNX3,EP300,RB1,EZH2,STAT1,RXRA,RELB,ZNF217,KDM4A,SUZ12,ZBTB40,MLLT1,PAX8,ZBTB33,BACH1,ZNF687,DPF2,SMAD1,NFIC,NFIB,EED,IKZF1,KLF5,RNF2,GATAD2B,CTCF,NR2F1,ESRRA,CBX8,SP1,RNF2,MEF2B,KDM4A,EBF1,POLR2A,MAFK,CTCF,IKZF1,YY1,IKZF2,NBN,BACH1,DPF2,RELB,ZNF207,ATF7,JUND,RAD21,ATF3,SIN3A,CREB1,CREM,ZNF143…	chr8	65487222	65501108	chr8	65493355
chr8	65493355	65493802	0.333333333333333	0.0177448923580911	0.727272727272727	0.357142857142857	0.626654982909037	0.636347012027247	50	6.8405621539482e-13	chr8	65492814	65496181	FirstExon	+	BHLHE22	protein_coding	chr8	65493355	65493802	1	0.132759132759133	CpG: 143	chr8	65492935	65494452	chr8	65493355	65493802	*	*	*	*	*	0	0	chr8-65493140:65493675	chr8	65493140	65493675	chr8	65493355	65493675	CTCF,HNF4G,TRIM22,SMC3,ATF2,RAD21,IKZF1,C11orf30,ZNF316,NFIC,MAFK,REST,IKZF2,MAFF,YY1,SKIL,TCF12,ZNF143,RUNX3,EP300,RB1,EZH2,STAT1,RXRA,RELB,ZNF217,KDM4A,SUZ12,ZBTB40,MLLT1,PAX8,ZBTB33,BACH1,ZNF687,DPF2,SMAD1,NFIC,NFIB,EED,IKZF1,KLF5,RNF2,GATAD2B,CTCF,NR2F1,ESRRA,CBX8,SP1,RNF2,MEF2B,KDM4A,EBF1,POLR2A,MAFK,CTCF,IKZF1,YY1,IKZF2,NBN,BACH1,DPF2,RELB,ZNF207,ATF7,JUND,RAD21,ATF3,SIN3A,CREB1,CREM,ZNF143…	chr8	65487222	65501108	chr8	65493355
chr8	72578302	72594675	0.204013377926421	-0.396053535587814	0.909090909090909	0.67741935483871	0.402506249879807	0.800372828716462	160	4.09537779703199e-26	chr8	72586534	72587534	Promoter	+	RP11-1144P22.1	lincRNA	chr8	72586534	72587534	0.0610761619739816	1	*	*	*	*	*	0	0	*	*	*	*	*	0	0	*	*	*	*	*	0	0	GATA3,POLR2A,TBP,CHD1,ATF7,CEBPB,ATF4,ATF3	chr8	72585294	72586917	chr8	72586534
chr8	72578302	72594675	0.204013377926421	-0.396053535587814	0.909090909090909	0.67741935483871	0.402506249879807	0.800372828716462	160	4.09537779703199e-26	chr8	72587535	72587770	FirstExon	+	RP11-1144P22.1	lincRNA	chr8	72587535	72587770	0.0143528980638857	1	*	*	*	*	*	0	0	*	*	*	*	*	0	0	chr8-72587600:72587750	chr8	72587600	72587750	chr8	72587600	72587750	*	*	*	*	*	0
chr8	72578302	72594675	0.204013377926421	-0.396053535587814	0.909090909090909	0.67741935483871	0.402506249879807	0.800372828716462	160	4.09537779703199e-26	chr8	72587771	72614449	Intron1	+	RP11-1144P22.1	lincRNA	chr8	72587771	72594675	0.421669822268369	0.258790014243946	*	*	*	*	*	0	0	*	*	*	*	*	0	0	chr8-72592480:72592730	chr8	72592480	72592730	chr8	72592480	72592730	CREB1,PKNOX1,FOS,DPF2,FOXA1,GATA3	chr8	72591757	72592213	chr8	72591757
chr8	77585066	77585625	0.290969899665552	-0.034917071230517	0.666666666666667	0.32	0.576524652837874	0.591071451697794	22	6.2174212137964e-08	chr8	77415082	77595286	Intron1	-	ZFHX4-AS1	antisense	chr8	77585066	77585625	1	0.00310203991032386	*	*	*	*	*	0	0	*	*	*	*	*	0	0	chr8-77585400:77587090	chr8	77585400	77587090	chr8	77585400	77585625	REST,POLR2A,ZEB1,TRIM28,SP1,EZH2,YY1,SIN3A,MXI1,SMARCA4,HNF4A,EED,HDAC2,EP300,RAD21,RFX1,SMC3,MAX,RXRA,KDM4A,FOXA2,MGA,L3MBTL2,PKNOX1,CBX2,E2F6,RNF2,CBX8,ETV6,BMI1,SUZ12,EZH2,EED,KDM4A,POLR2A,CTCF,RBBP5,SP1,RNF2,CBX8,MAX,RXRA,HNF4A,L3MBTL2,RAD21,CHD1,SIN3A,EP300,YY1,SPI1,TAF1,CBX2,CBX8,RNF2,CUX1,ZNF316,MAFK,EZH2,CBX8,RNF2,ZBTB33,SP1,RAD21,NR2F2,HNF4A,RXRA,YY1	chr8	77584811	77589188	chr8	77585066
chr8	84350060	84372319	0.211640211640212	0.00558764398282396	0.583333333333333	0.314285714285714	0.740730525168893	0.73082698990277	164	2.12113083826381e-11	*	*	*	InterGenic	*	*	*	*	*	*	*	*	*	*	*	*	*	0	0	*	*	*	*	*	0	0	chr8-84366585:84366735	chr8	84366585	84366735	chr8	84366585	84366735	CREB1	chr8	84372024	84372457	chr8	84372024
chr8	84416095	84443645	0.2225	-0.055902977949634	0.630681818181818	0.364745011086475	0.640037321490309	0.723160070564071	177	3.60023095951887e-24	*	*	*	InterGenic	*	*	*	*	*	*	*	*	*	*	*	*	*	0	0	*	*	*	*	*	0	0	chr8-84440505:84440790	chr8	84440505	84440790	chr8	84440505	84440790	MAFK	chr8	84442242	84442482	chr8	84442242
chr8	90072298	90078841	0.219814241486068	0.101127777457264	0.588235294117647	0.363636363636364	0.750543055795941	0.658200584238194	20	0.0210609572339522	*	*	*	InterGenic	*	*	*	*	*	*	*	*	*	*	*	*	*	0	0	*	*	*	*	*	0	0	chr8-90074820:90074970	chr8	90074820	90074970	chr8	90074820	90074970	ZNF24	chr8	90075937	90076277	chr8	90075937
chr8	90465591	90479938	0.218263888888889	-0.192577595613492	0.75	0.462912087912088	0.679755512555742	0.834799651719531	73	8.81781480546934e-09	*	*	*	InterGenic	*	*	*	*	*	*	*	*	*	*	*	*	*	0	0	chr8:90479154-90479488	chr8	90479154	90479488	chr8	90479154	90479488	chr8-90479205:90479535	chr8	90479205	90479535	chr8	90479205	90479535	ATF2	chr8	90478679	90479089	chr8	90478679
chr8	142210453	142212919	0.30850439882698	-0.407736894753247	0.891812865497076	0.541129032258065	0.490781395387654	0.896178573784757	81	1.57023793526998e-23	*	*	*	InterGenic	*	*	*	*	*	*	*	*	*	*	*	*	*	0	0	*	*	*	*	*	0	0	chr8-142211265:142211490	chr8	142211265	142211490	chr8	142211265	142211490	SIN3A	chr8	142212024	142212644	chr8	142212024
chr8	142212924	142213323	0.219128466327108	0.0194275722016751	0.621345029239766	0.372983870967742	0.829518287397615	0.807761819655244	25	0.000130525660993371	*	*	*	InterGenic	*	*	*	*	*	*	*	*	*	*	*	*	*	0	0	*	*	*	*	*	0	0	*	*	*	*	*	0	0	SIN3A,ZBTB33,SP1,PCBP2,HNRNPK	chr8	142212919	142213864	chr8	142212924
chr8	142438817	142440878	0.207017543859649	-0.337756128843102	0.857142857142857	0.592592592592593	0.567606510371594	0.90642373722857	96	3.78065964801847e-16	chr8	142437170	142441026	Intron4	+	PTP4A3	protein_coding	chr8	142438817	142440878	1	0.534491701244813	CpG: 60	chr8	142439683	142440547	chr8	142439683	142440547	*	*	*	*	*	0	0	chr8-142440545:142440735	chr8	142440545	142440735	chr8	142440545	142440735	POLR2A,POLR2G,ZBTB33,POLR2G,RBFOX2,TAF15,CTCF,SAFB,SIN3A,GATAD2B,RBM39,AGO1,L3MBTL2,CTBP1,HNRNPL,ZBTB7A,RB1,EGR1,CC2D1A,SMC3,ESRRA,MYC,KDM4B,REST,RCOR1,XRCC5,RBM22,ZNF444,SMARCA5,ZNF143,KLF16,NFIC,YY1,ZNF282,ARID2,TRIM22,ARID3A,BHLHE40,RAD21,PML,MAX,ZFP91,AGO2,JUND,E2F6,ZNF592,TCF12,MYNN,SMARCA4,CREM,MAFK,ZKSCAN1,RBM15	chr8	142439945	142442782	chr8	142439945
chr8	142850597	142853260	0.214285714285715	-0.158363551381975	0.7	0.483870967741935	0.701862420566087	0.821689820605279	60	6.54766714534315e-06	*	*	*	InterGenic	*	*	*	*	*	*	*	*	*	*	*	*	*	0	0	*	*	*	*	*	0	0	chr8-142852965:142853195	chr8	142852965	142853195	chr8	142852965	142853195	MNT,EZH2	chr8	142852016	142853175	chr8	142852016
chr8	143596820	143599529	0.25	-0.346644953875847	0.866666666666667	0.571428571428571	0.563130582247696	0.882530715769499	118	5.60933309237854e-21	chr8	143592435	143599498	Intron18	+	BAI1	protein_coding	chr8	143596820	143599498	0.988556662975268	0.379158997593091	*	*	*	*	*	0	0	*	*	*	*	*	0	0	chr8-143599305:143599455	chr8	143599305	143599455	chr8	143599305	143599455	MNT,CTCF	chr8	143597721	143598385	chr8	143597721
chr8	143596820	143599529	0.25	-0.346644953875847	0.866666666666667	0.571428571428571	0.563130582247696	0.882530715769499	118	5.60933309237854e-21	chr8	143599499	143599602	Exon19	+	BAI1	protein_coding	chr8	143599499	143599529	0.0110741971207087	0.29126213592233	*	*	*	*	*	0	0	*	*	*	*	*	0	0	*	*	*	*	*	0	0	*	*	*	*	*	0
chr8	144245531	144247977	0.211842105263158	-0.149670076376436	0.75	0.466666666666667	0.715488599501357	0.889285355954625	50	1.53814333123824e-07	*	*	*	InterGenic	*	*	*	*	*	*	*	*	*	*	*	*	*	0	0	*	*	*	*	*	0	0	*	*	*	*	*	0	0	ZNF592,GATAD2B,ZNF444,E4F1,CTBP1,ZBTB1,HES1,ARID3A,FOXA1,ZNF8,SUZ12,PKNOX1,ZKSCAN1,NFIB,ZNF207,NEUROD1,ESRRA,MLLT1,IKZF1,NCOA3,GABPB1,CREB1,ZNF687	chr8	144247867	144248770	chr8	144247867
chr8	144646321	144646542	0.235897435897436	0.208440907556465	0.466666666666667	0.230769230769231	0.766275081667684	0.571573421089616	14	0.0135757014015997	*	*	*	InterGenic	*	*	*	*	*	*	*	*	*	*	*	*	*	0	0	*	*	*	*	*	0	0	*	*	*	*	*	0	0	HNRNPL,RBFOX2,POLR2A,RBM39,SP1,RXRA,HNF4G,ZNF384,ZFP91	chr8	144644798	144646769	chr8	144646321
chr9	1050011	1050492	0.276515151515152	0.025226626234945	0.642857142857143	0.333333333333333	0.681035839095611	0.67913271579222	41	3.91362729968521e-07	chr9	1049353	1050353	Promoter	+	DMRT2	protein_coding	chr9	1050011	1050353	0.711018711018711	0.342	CpG: 39	chr9	1050078	1050510	chr9	1050078	1050353	*	*	*	*	*	0	0	chr9-1050005:1050675	chr9	1050005	1050675	chr9	1050011	1050353	IKZF1,SMARCA4,BHLHE40,ZNF687,EZH2,NBN,GATAD2B,SKIL,TBX21,ZBTB33,BHLHE40,ATF2,MAX,CTCF,MLLT1,NFIB,RFX1,TRIM22,MAX,ZNF579,SP1,ZNF217,ZNF444,NFIB,HCFC1,CREB1,MNT,CTBP1,RFX5,POLR2A,RAD51,ZNF512B,NRF1,NEUROD1,MTA1,FOS,NFYB,ELF1,MBD2,ZNF687,MYC,BHLHE40,KDM4A,EGR1,PKNOX1,GATA3,HNRNPLL,ESRRA,RB1,NFXL1,E2F6,ESR1,NCOA3,ZKSCAN1,NR2F1,EZH2,IKZF1,SUZ12,BHLHE40,RNF2,KDM4A,MXI1,ELF1,POLR2A,DPF2,ASH2L,RBBP5,CTCF…	chr9	1047322	1054312	chr9	1050011
chr9	1050011	1050492	0.276515151515152	0.025226626234945	0.642857142857143	0.333333333333333	0.681035839095611	0.67913271579222	41	3.91362729968521e-07	chr9	1050354	1050482	FirstExon	+	DMRT2	protein_coding	chr9	1050354	1050482	0.266112266112266	1	CpG: 39	chr9	1050078	1050510	chr9	1050354	1050482	*	*	*	*	*	0	0	chr9-1050005:1050675	chr9	1050005	1050675	chr9	1050354	1050482	IKZF1,SMARCA4,BHLHE40,ZNF687,EZH2,NBN,GATAD2B,SKIL,TBX21,ZBTB33,BHLHE40,ATF2,MAX,CTCF,MLLT1,NFIB,RFX1,TRIM22,MAX,ZNF579,SP1,ZNF217,ZNF444,NFIB,HCFC1,CREB1,MNT,CTBP1,RFX5,POLR2A,RAD51,ZNF512B,NRF1,NEUROD1,MTA1,FOS,NFYB,ELF1,MBD2,ZNF687,MYC,BHLHE40,KDM4A,EGR1,PKNOX1,GATA3,HNRNPLL,ESRRA,RB1,NFXL1,E2F6,ESR1,NCOA3,ZKSCAN1,NR2F1,EZH2,IKZF1,SUZ12,BHLHE40,RNF2,KDM4A,MXI1,ELF1,POLR2A,DPF2,ASH2L,RBBP5,CTCF…	chr9	1047322	1054312	chr9	1050354
chr9	1050011	1050492	0.276515151515152	0.025226626234945	0.642857142857143	0.333333333333333	0.681035839095611	0.67913271579222	41	3.91362729968521e-07	chr9	1050483	1050619	Intron1	+	DMRT2	protein_coding	chr9	1050483	1050492	0.0187110187110187	0.0661764705882353	CpG: 39	chr9	1050078	1050510	chr9	1050483	1050492	*	*	*	*	*	0	0	chr9-1050005:1050675	chr9	1050005	1050675	chr9	1050483	1050492	IKZF1,SMARCA4,BHLHE40,ZNF687,EZH2,NBN,GATAD2B,SKIL,TBX21,ZBTB33,BHLHE40,ATF2,MAX,CTCF,MLLT1,NFIB,RFX1,TRIM22,MAX,ZNF579,SP1,ZNF217,ZNF444,NFIB,HCFC1,CREB1,MNT,CTBP1,RFX5,POLR2A,RAD51,ZNF512B,NRF1,NEUROD1,MTA1,FOS,NFYB,ELF1,MBD2,ZNF687,MYC,BHLHE40,KDM4A,EGR1,PKNOX1,GATA3,HNRNPLL,ESRRA,RB1,NFXL1,E2F6,ESR1,NCOA3,ZKSCAN1,NR2F1,EZH2,IKZF1,SUZ12,BHLHE40,RNF2,KDM4A,MXI1,ELF1,POLR2A,DPF2,ASH2L,RBBP5,CTCF…	chr9	1047322	1054312	chr9	1050483
chr9	11980060	11981588	0.212573099415205	0.25654920354995	0.333333333333333	0.105263157894737	0.625261201689485	0.336477939939166	25	6.67425143339738e-05	*	*	*	InterGenic	*	*	*	*	*	*	*	*	*	*	*	*	*	0	0	*	*	*	*	*	0	0	*	*	*	*	*	0	0	*	*	*	*	*	0
chr9	16828485	16829242	0.267613636363636	0.114192467210596	0.5625	0.222278225806452	0.705928445089077	0.540811394361194	31	3.91364917595098e-08	chr9	16738484	16870643	Intron1	-	BNC2	protein_coding	chr9	16828485	16829242	1	0.00572794891002505	CpG: 21	chr9	16828935	16829169	chr9	16828935	16829169	*	*	*	*	*	0	0	chr9-16828425:16829350	chr9	16828425	16829350	chr9	16828485	16829242	TRIM28,EZH2,NR2F2,RAD21,RFX1,NR3C1,CTBP1,SIN3A,RCOR1,ESR1,ZFX,ASH2L,FOXA1,POLR2A	chr9	16828354	16829535	chr9	16828485
chr9	21487790	21490628	0.219047619047619	-0.426146924531406	0.928571428571429	0.692307692307692	0.346950694324252	0.771202950231897	62	4.93637320586277e-14	chr9	21477292	21559487	Intron1	-	MIR31HG	sense_overlapping	chr9	21487790	21490628	1	0.034527647667133	*	*	*	*	*	0	0	*	*	*	*	*	0	0	*	*	*	*	*	0	0	LCORL,NFIB	chr9	21488289	21488639	chr9	21488289
chr9	27945756	27972111	0.205882352941176	-0.00252793403938056	0.605555555555556	0.363636363636364	0.682146448223672	0.70715234625198	173	5.29242150303792e-19	chr9	27948076	27950704	LastExon	-	LINGO2	protein_coding	chr9	27948076	27950704	0.0997154240182129	1	*	*	*	*	*	0	0	*	*	*	*	*	0	0	*	*	*	*	*	0	0	*	*	*	*	*	0
chr9	27945756	27972111	0.205882352941176	-0.00252793403938056	0.605555555555556	0.363636363636364	0.682146448223672	0.70715234625198	173	5.29242150303792e-19	chr9	27950705	28012352	Intron5	-	LINGO2	protein_coding	chr9	27950705	27972111	0.812217795484728	0.347235064155596	*	*	*	*	*	0	0	*	*	*	*	*	0	0	chr9-27967320:27967490	chr9	27967320	27967490	chr9	27967320	27967490	EP300	chr9	27954902	27955208	chr9	27954902
chr9	28146508	28153023	0.411878052503052	-0.289358354933877	0.833333333333333	0.366666666666667	0.497038283351729	0.746880960622967	111	2.51734312121038e-30	chr9	28012404	28295205	Intron4	-	LINGO2	protein_coding	chr9	28146508	28153023	1	0.023037400857847	*	*	*	*	*	0	0	*	*	*	*	*	0	0	chr9-28147565:28147715	chr9	28147565	28147715	chr9	28147565	28147715	USF1	chr9	28152208	28152448	chr9	28152208
chr9	28153245	28171727	0.200668896321071	0.022160968789433	0.588235294117647	0.321428571428571	0.694987500240385	0.662591123829328	84	1.64239745035855e-08	chr9	28012404	28295205	Intron4	-	LINGO2	protein_coding	chr9	28153245	28171727	1	0.0653533756952769	*	*	*	*	*	0	0	*	*	*	*	*	0	0	chr9-28153165:28153315	chr9	28153165	28153315	chr9	28153245	28153315	USF1	chr9	28155159	28155408	chr9	28155159
chr9	29228735	29233490	0.229487179487179	-0.023207321853	0.577380952380952	0.307894736842105	0.609212563385519	0.61480227528853	33	1.4786649281205e-08	*	*	*	InterGenic	*	*	*	*	*	*	*	*	*	*	*	*	*	0	0	*	*	*	*	*	0	0	chr9-29228700:29228910	chr9	29228700	29228910	chr9	29228735	29228910	FOS	chr9	29228656	29228900	chr9	29228735
chr9	30966975	30988339	0.229665071770334	0.021418100242693	0.416666666666667	0.235294117647059	0.729573958513622	0.720321349147894	34	0.00405192749458491	*	*	*	InterGenic	*	*	*	*	*	*	*	*	*	*	*	*	*	0	0	*	*	*	*	*	0	0	chr9-30967540:30967775	chr9	30967540	30967775	chr9	30967540	30967775	CTCF,RAD21	chr9	30967202	30968105	chr9	30967202
chr9	88073226	88080748	0.216919191919192	-0.386605555627916	0.882352941176471	0.65	0.459951811646663	0.862345164955668	105	1.21170879205442e-18	*	*	*	InterGenic	*	*	*	*	*	*	*	*	*	*	*	*	*	0	0	*	*	*	*	*	0	0	chr9-88073120:88073310	chr9	88073120	88073310	chr9	88073226	88073310	TAL1,CBFA2T3	chr9	88074370	88074746	chr9	88074370
chr9	90266542	90268931	0.288616015396201	-0.406908400340293	0.882352941176471	0.554093567251462	0.510592271034827	0.91424857654911	47	6.64571535342092e-16	chr9	90266442	90266639	Exon17	+	DAPK1	protein_coding	chr9	90266542	90266639	0.0406027626622018	0.49238578680203	*	*	*	*	*	0	0	*	*	*	*	*	0	0	*	*	*	*	*	0	0	*	*	*	*	*	0
chr9	90266542	90268931	0.288616015396201	-0.406908400340293	0.882352941176471	0.554093567251462	0.510592271034827	0.91424857654911	47	6.64571535342092e-16	chr9	90266640	90272943	Intron17	+	DAPK1	protein_coding	chr9	90266640	90268931	0.958978652155714	0.363477709027447	*	*	*	*	*	0	0	*	*	*	*	*	0	0	*	*	*	*	*	0	0	*	*	*	*	*	0
chr9	107525651	107526211	0.292258129467432	0.213758625201831	0.520833333333333	0.112193588937775	0.692509162753848	0.546036374750787	27	6.15279624043634e-06	chr9	107525450	107526450	Promoter	+	NIPSNAP3B	protein_coding	chr9	107525651	107526211	1	0.56	CpG: 61	chr9	107526172	107526779	chr9	107526172	107526211	*	*	*	*	*	0	0	chr9-107526000:107526795	chr9	107526000	107526795	chr9	107526000	107526211	ZNF217,ZBTB33,ZMYM3,CBX1,SMARCA5,CC2D1A,ZHX2,ATF3,FOXM1,BCL3,GATAD2B,CHAMP1,MLLT1,NFIC,CBX3,POLR2A,KDM1A,CTCF,TBX21,RFX1,REST,SIN3A,ATF7,NBN,PHF8,SKIL,MNT,SMARCA4,ZFX,ZNF687,HCFC1,MYC,MXI1,MAX,FOXA1,RBFOX2,RNF2,KDM4A,CREM,GMEB1,IKZF1,NRF1,TAF9B,POLR2G,RBBP5,NR2F1,ASH2L,ZNF592,ZNF282,GATA1,HNRNPLL,EP300,KDM5B,RBM39,NR2C1,ZSCAN29,TAF1,CBFB,MBD2,YY1,HDAC1,RLF,CBX1,BACH1,L3MBTL2,TBP,IRF1,SMAD5,ZBTB7A…	chr9	107525592	107528229	chr9	107525651
chr9	107688723	107689320	0.333333333333333	-0.20036274514083	0.857142857142857	0.5	0.4566580250915	0.726738019266723	48	5.96856949866953e-16	chr9	107666053	107690215	Intron1	-	ABCA1	protein_coding	chr9	107688723	107689320	1	0.0247082195182518	CpG: 30	chr9	107688769	107689046	chr9	107688769	107689046	*	*	*	*	*	0	0	chr9-107688760:107689095	chr9	107688760	107689095	chr9	107688760	107689095	POLR2A,ASH2L,YY1,NR2F2,CTCF,GABPA,U2AF1,ZNF384,ZSCAN29,REST,NCOR1,TAF1,ZNF444,HNF4A,CTBP1,SIN3A,KDM5A,RUNX3,ZNF217,RAD21,SP1,TAF15,RBFOX2,TRIM22,FUS,SPI1,MYC,GATA3,ASH2L,PRPF4,EP300,ELF1,POLR2A,SMC3,TFAP4,ZNF24,TBL1XR1,FOXA1,NR3C1,AGO2,YY1,ZNF143,JUND,SKI,RB1,TCF12,HNRNPLL,HDAC2,PHF8,XRCC5,SMARCA5,FOSL2,POLR2G,ESRRA,RXRA,KDM1A,SMARCA4,ZNF579,L3MBTL2,CHD4,KDM4A,ZNF384,TFAP4,RXRA,POLR2G,TAF1,RAD21,…	chr9	107687254	107691180	chr9	107688723
chr9	107688723	107689320	0.333333333333333	-0.20036274514083	0.857142857142857	0.5	0.4566580250915	0.726738019266723	48	5.96856949866953e-16	chr9	107688833	107689833	Promoter	+	RP11-217B7.2	antisense	chr9	107688833	107689320	0.815745393634841	0.487	CpG: 30	chr9	107688769	107689046	chr9	107688833	107689046	*	*	*	*	*	0	0	chr9-107688760:107689095	chr9	107688760	107689095	chr9	107688833	107689095	POLR2A,ASH2L,YY1,NR2F2,CTCF,GABPA,U2AF1,ZNF384,ZSCAN29,REST,NCOR1,TAF1,ZNF444,HNF4A,CTBP1,SIN3A,KDM5A,RUNX3,ZNF217,RAD21,SP1,TAF15,RBFOX2,TRIM22,FUS,SPI1,MYC,GATA3,ASH2L,PRPF4,EP300,ELF1,POLR2A,SMC3,TFAP4,ZNF24,TBL1XR1,FOXA1,NR3C1,AGO2,YY1,ZNF143,JUND,SKI,RB1,TCF12,HNRNPLL,HDAC2,PHF8,XRCC5,SMARCA5,FOSL2,POLR2G,ESRRA,RXRA,KDM1A,SMARCA4,ZNF579,L3MBTL2,CHD4,KDM4A,ZNF384,TFAP4,RXRA,POLR2G,TAF1,RAD21,…	chr9	107687254	107691180	chr9	107688833
chr9	115874615	115875432	0.22672064777328	0.231920631689299	0.384615384615385	0.142857142857143	0.55946327490784	0.290365178348514	38	2.22145333304415e-09	chr9	115873754	115874754	Promoter	-	FAM225B	lincRNA	chr9	115874615	115874754	0.170134638922889	0.139	*	*	*	*	*	0	0	*	*	*	*	*	0	0	chr9-115874565:115874775	chr9	115874565	115874775	chr9	115874615	115874754	CTCF,SMC3,TRIM22,NFIB,ZNF143,ZNF444,NFIC,REST,RAD21,GATA3,FOS,NFIC,SMC3,JUND,STAT3,NFIB,RAD21,TRIM22	chr9	115873361	115875753	chr9	115874615
chr9	115874615	115875432	0.22672064777328	0.231920631689299	0.384615384615385	0.142857142857143	0.55946327490784	0.290365178348514	38	2.22145333304415e-09	chr9	115874352	115875352	Promoter	+	FAM225A	lincRNA	chr9	115874615	115875352	0.902080783353733	0.737	CpG: 52	chr9	115875199	115875738	chr9	115875199	115875352	*	*	*	*	*	0	0	chr9-115874905:115875475	chr9	115874905	115875475	chr9	115874905	115875352	CTCF,SMC3,TRIM22,NFIB,ZNF143,ZNF444,NFIC,REST,RAD21,GATA3,FOS,NFIC,SMC3,JUND,STAT3,NFIB,RAD21,TRIM22	chr9	115873361	115875753	chr9	115874615
chr9	115874615	115875432	0.22672064777328	0.231920631689299	0.384615384615385	0.142857142857143	0.55946327490784	0.290365178348514	38	2.22145333304415e-09	chr9	115875353	115875943	FirstExon	+	FAM225A	lincRNA	chr9	115875353	115875432	0.0966952264381885	0.133898305084746	CpG: 52	chr9	115875199	115875738	chr9	115875353	115875432	*	*	*	*	*	0	0	chr9-115874905:115875475	chr9	115874905	115875475	chr9	115875353	115875432	CTCF,SMC3,TRIM22,NFIB,ZNF143,ZNF444,NFIC,REST,RAD21,GATA3,FOS,NFIC,SMC3,JUND,STAT3,NFIB,RAD21,TRIM22	chr9	115873361	115875753	chr9	115875353
chr9	128836735	128840584	0.25	-0.301628006826552	0.857142857142857	0.578947368421053	0.494451918327229	0.830246920103592	56	9.90664441418595e-12	chr9	128820094	128921811	Intron1	+	RP11-343J18.2	lincRNA	chr9	128836735	128840584	1	0.0378402823520159	*	*	*	*	*	0	0	*	*	*	*	*	0	0	*	*	*	*	*	0	0	FOXA1	chr9	128837396	128837786	chr9	128837396
chr9	130815471	130818863	0.210526315789474	-0.39093736045582	0.9375	0.678571428571429	0.412213580647056	0.824367127664955	62	1.87277822224919e-14	chr9	130801587	130819434	Intron1	-	RP11-379C10.1	antisense	chr9	130815471	130818863	1	0.190059954053903	*	*	*	*	*	0	0	chr9:130817970-130818290	chr9	130817970	130818290	chr9	130817970	130818290	chr9-130818545:130818695	chr9	130818545	130818695	chr9	130818545	130818695	HNRNPK,CTCF,PCBP2,POLR2A,EP300,SPI1,YY1,ZBTB33,REST,MAX,ATF3,JUND,NR2F2,RAD21,FOXA1,SP1,HNF4G,NR3C1,HNF4A,RXRA,ESR1,FOXA2,ZMYM3,USF1	chr9	130817497	130818868	chr9	130817497
chr9	132211540	132216914	0.210622710622711	-0.314115035045753	0.846153846153846	0.595238095238095	0.554832593066821	0.873420642173776	98	9.00329887910598e-17	*	*	*	InterGenic	*	*	*	*	*	*	*	*	*	*	*	*	*	0	0	*	*	*	*	*	0	0	chr9-132215645:132216315	chr9	132215645	132216315	chr9	132215645	132216315	POLR2A,EGR1,MAFK,MAFF,SMARCA4	chr9	132216717	132217832	chr9	132216717
chr9	133342506	133343211	0.222156620182937	0.204415193968089	0.345238095238095	0.133928571428572	0.735163107218177	0.532850475973306	25	2.43512581114878e-05	chr9	133342187	133346220	Intron6	+	ASS1	protein_coding	chr9	133342506	133343211	1	0.174807835358294	*	*	*	*	*	0	0	chr9:133342925-133343088	chr9	133342925	133343088	chr9	133342925	133343088	chr9-133342785:133343135	chr9	133342785	133343135	chr9	133342785	133343135	CTCF,SMC3,RAD21,RXRA,POLR2G,AGO2,NR2F2,RXRA,HNF4A,SP1,FOXA1,ZBTB33,MAX,YY1,RAD21,ATF3,GABPA,JUND,EGR1,REST,USF1,EP300,MXI1,SMC3,RAD21,SMARCA4	chr9	133340739	133343239	chr9	133342506
chr9	137098773	137103060	0.231027667984189	-0.313262612104963	0.833333333333333	0.592490842490842	0.561825099075778	0.899689537650865	97	4.99711300810065e-18	*	*	*	InterGenic	*	*	*	*	*	*	*	*	*	*	*	*	*	0	0	*	*	*	*	*	0	0	chr9-137102765:137103030	chr9	137102765	137103030	chr9	137102765	137103030	NR2F2,YY1,MAFK,SP1,RXRA,ZBTB33,ATF3,HNF4A,EP300,REST,GABPA,JUND,RAD21,HNF4G,POLR2A,MAX,EGR1,ZFX,KDM1A,CBX1,ZMYM3,BCOR	chr9	137102556	137103811	chr9	137102556
chr9	137356381	137358953	0.283333333333333	-0.401715116471179	0.894736842105263	0.59375	0.440535652796116	0.868712553555985	124	2.60556701018759e-34	*	*	*	InterGenic	*	*	*	*	*	*	*	*	CpG: 161	chr9	137356381	137358802	chr9	137356381	137358802	*	*	*	*	*	0	0	*	*	*	*	*	0	0	*	*	*	*	*	0
chr9	138913219	138918113	0.210206718346253	-0.304416943005081	0.84	0.609756097560976	0.530387286426177	0.88202057305833	115	1.69325826026938e-21	chr9	138908276	138941481	Intron1	-	NACC2	protein_coding	chr9	138913219	138918113	1	0.147387441650354	*	*	*	*	*	0	0	chr9:138915703-138915918	chr9	138915703	138915918	chr9	138915703	138915918	chr9-138916405:138917110	chr9	138916405	138917110	chr9	138916405	138917110	RBM22,MXI1,USF2,BHLHE40,POLR2A,EP300,RXRA,SP1,NR3C1,CREB1,FOXP1,CTCF,RBM22	chr9	138915425	138917309	chr9	138915425
chr9	139606199	139606680	0.205592105263158	0.041581313420796	0.368421052631579	0.193548387096774	0.691388247674192	0.646690895782885	44	6.62935011928657e-06	chr9	139606021	139607021	Promoter	+	FAM69B	protein_coding	chr9	139606199	139606680	1	0.481	CpG: 81	chr9	139606300	139607433	chr9	139606300	139606680	chr9:139606234-139606418	chr9	139606234	139606418	chr9	139606234	139606418	chr9-139606145:139608035	chr9	139606145	139608035	chr9	139606199	139606680	ZBTB33,RNF2,GATA2,GATA3,CBFA2T3,FOS,NFIC,ZMYM3,JUND,KDM1A,DPF2,HDAC2,ATF3,ZNF384,ZEB2,BCOR,FOSL2,ZNF579,EZH2,FOSL1,SP1,RBBP5,CTCF,SKIL,HDAC2,L3MBTL2,ASH2L,UBTF,RLF,ZNF407,RBFOX2,REST,HDAC1,GMEB1,TAF7,NRF1,CTBP1,MTA3,POLR2A,ZEB2,FOXA1,PRDM10,ZBTB2,EGR1,SUZ12,MTA2,KDM4A,MXI1,SIN3A,PHF8,SP1,EP300,RB1,GATAD2A,POLR2G,SAFB,FOXM1,IRF1,EGR1,ZBTB7A,TAF1,POLR2A,MYC,ZFX,E2F6,MXI1,AGO1,EZH2,ZBTB40,NR2F1,CTCF…	chr9	139605350	139609950	chr9	139606199
chr9	140388080	140396612	0.205594271848142	-0.328325111237905	0.853571428571428	0.648648648648649	0.508410697621276	0.861024723415495	337	1.86525334418577e-71	chr9	140387535	140389484	Intron18	-	PNPLA7	protein_coding	chr9	140388080	140389484	0.164556962025316	0.720369420215495	CpG: 21	chr9	140389453	140389751	chr9	140389453	140389484	chr9:140388730-140388770	chr9	140388730	140388770	chr9	140388730	140388770	chr9-140389365:140389515	chr9	140389365	140389515	chr9	140389365	140389484	RBFOX2,NRF1,POLR2G,RNF2,CREM,MAX,MEIS2,BHLHE40,ZNF184,NFE2,SMARCA4,IRF1,HDAC1,PKNOX1,GABPB1,MLLT1,ZBTB40,NR2C1,HDAC2,PHF8,SMARCC2,ATF7,CTBP1,SMARCE1,ARNT,MTA1,NCOR1,NCOA1,MYC,NR2F2,ZNF24,CBFA2T2,ZBTB7A,ESRRA,NBN,LEF1,TCF12,REST,MTA2,NR2F1,DPF2,GATA2,ARID1B,BCOR,CBFA2T3,STAT5A,CC2D1A,JUN,IKZF1,POLR2A,ZMYM3,TAL1,NR2F6,MITF,ZNF384,EGR1,NRF1,ZBTB7A,CREM,ZFX,ZNF592,MGA,YY1,SMARCA4,MAX,E2F6,BHLHE40,L3M…	chr9	140385974	140389564	chr9	140388080
chr9	140388080	140396612	0.205594271848142	-0.328325111237905	0.853571428571428	0.648648648648649	0.508410697621276	0.861024723415495	337	1.86525334418577e-71	chr9	140389485	140389598	Exon18	-	PNPLA7	protein_coding	chr9	140389485	140389598	0.013244256915143	1	CpG: 21	chr9	140389453	140389751	chr9	140389485	140389598	*	*	*	*	*	0	0	chr9-140389565:140389895	chr9	140389565	140389895	chr9	140389565	140389598	RBFOX2,NRF1,POLR2G,RNF2,CREM,MAX,MEIS2,BHLHE40,ZNF184,NFE2,SMARCA4,IRF1,HDAC1,PKNOX1,GABPB1,MLLT1,ZBTB40,NR2C1,HDAC2,PHF8,SMARCC2,ATF7,CTBP1,SMARCE1,ARNT,MTA1,NCOR1,NCOA1,MYC,NR2F2,ZNF24,CBFA2T2,ZBTB7A,ESRRA,NBN,LEF1,TCF12,REST,MTA2,NR2F1,DPF2,GATA2,ARID1B,BCOR,CBFA2T3,STAT5A,CC2D1A,JUN,IKZF1,POLR2A,ZMYM3,TAL1,NR2F6,MITF,ZNF384,EGR1,NRF1,ZBTB7A,CREM,ZFX,ZNF592,MGA,YY1,SMARCA4,MAX,E2F6,BHLHE40,L3M…	chr9	140385974	140389564	chr9	140389485
chr9	140388080	140396612	0.205594271848142	-0.328325111237905	0.853571428571428	0.648648648648649	0.508410697621276	0.861024723415495	337	1.86525334418577e-71	chr9	140389599	140391638	Intron17	-	PNPLA7	protein_coding	chr9	140389599	140391638	0.238982653539616	1	CpG: 21	chr9	140389453	140389751	chr9	140389599	140389751	*	*	*	*	*	0	0	chr9-140391225:140391815	chr9	140391225	140391815	chr9	140391225	140391638	ZBTB33	chr9	140390102	140390256	chr9	140390102
chr9	140388080	140396612	0.205594271848142	-0.328325111237905	0.853571428571428	0.648648648648649	0.508410697621276	0.861024723415495	337	1.86525334418577e-71	chr9	140391639	140391762	Exon17	-	PNPLA7	protein_coding	chr9	140391639	140391762	0.0144163150492264	1	*	*	*	*	*	0	0	*	*	*	*	*	0	0	chr9-140391225:140391815	chr9	140391225	140391815	chr9	140391639	140391762	*	*	*	*	*	0
chr9	140388080	140396612	0.205594271848142	-0.328325111237905	0.853571428571428	0.648648648648649	0.508410697621276	0.861024723415495	337	1.86525334418577e-71	chr9	140391763	140392565	Intron16	-	PNPLA7	protein_coding	chr9	140391763	140392565	0.0939990623534927	1	*	*	*	*	*	0	0	*	*	*	*	*	0	0	chr9-140392265:140392655	chr9	140392265	140392655	chr9	140392265	140392565	BMI1,RFX1,PCBP1,TAF15,CTCF	chr9	140392316	140393267	chr9	140392316
chr9	140388080	140396612	0.205594271848142	-0.328325111237905	0.853571428571428	0.648648648648649	0.508410697621276	0.861024723415495	337	1.86525334418577e-71	chr9	140392566	140392697	Exon16	-	PNPLA7	protein_coding	chr9	140392566	140392697	0.0153539615564932	1	*	*	*	*	*	0	0	*	*	*	*	*	0	0	chr9-140392265:140392655	chr9	140392265	140392655	chr9	140392566	140392655	BMI1,RFX1,PCBP1,TAF15,CTCF	chr9	140392316	140393267	chr9	140392566
chr9	140388080	140396612	0.205594271848142	-0.328325111237905	0.853571428571428	0.648648648648649	0.508410697621276	0.861024723415495	337	1.86525334418577e-71	chr9	140392698	140395142	Intron15	-	PNPLA7	protein_coding	chr9	140392698	140395142	0.286451007969995	1	*	*	*	*	*	0	0	*	*	*	*	*	0	0	chr9-140392700:140396435	chr9	140392700	140396435	chr9	140392700	140395142	EGR1,MYC,CREM	chr9	140394479	140394923	chr9	140394479
chr9	140388080	140396612	0.205594271848142	-0.328325111237905	0.853571428571428	0.648648648648649	0.508410697621276	0.861024723415495	337	1.86525334418577e-71	chr9	140395143	140395348	Exon15	-	PNPLA7	protein_coding	chr9	140395143	140395348	0.0240271917487107	1	CpG: 43	chr9	140395218	140395755	chr9	140395218	140395348	*	*	*	*	*	0	0	chr9-140392700:140396435	chr9	140392700	140396435	chr9	140395143	140395348	ZBTB33	chr9	140395186	140395642	chr9	140395186
chr9	140388080	140396612	0.205594271848142	-0.328325111237905	0.853571428571428	0.648648648648649	0.508410697621276	0.861024723415495	337	1.86525334418577e-71	chr9	140395349	140396101	Intron14	-	PNPLA7	protein_coding	chr9	140395349	140396101	0.0881387716830755	1	CpG: 43	chr9	140395218	140395755	chr9	140395349	140395755	*	*	*	*	*	0	0	chr9-140392700:140396435	chr9	140392700	140396435	chr9	140395349	140396101	ZBTB33	chr9	140395186	140395642	chr9	140395349
chr9	140388080	140396612	0.205594271848142	-0.328325111237905	0.853571428571428	0.648648648648649	0.508410697621276	0.861024723415495	337	1.86525334418577e-71	chr9	140396102	140396179	Exon14	-	PNPLA7	protein_coding	chr9	140396102	140396179	0.00902484763244257	1	*	*	*	*	*	0	0	*	*	*	*	*	0	0	chr9-140392700:140396435	chr9	140392700	140396435	chr9	140396102	140396179	*	*	*	*	*	0
chr9	140388080	140396612	0.205594271848142	-0.328325111237905	0.853571428571428	0.648648648648649	0.508410697621276	0.861024723415495	337	1.86525334418577e-71	chr9	140396180	140400065	Intron13	-	PNPLA7	protein_coding	chr9	140396180	140396612	0.0506329113924051	0.111196911196911	*	*	*	*	*	0	0	*	*	*	*	*	0	0	chr9-140396465:140397575	chr9	140396465	140397575	chr9	140396465	140396612	KDM5B,ZBTB40,ATF4,ZNF217,ATF7,ATF2,PRDM10,ATF3,ZNF687,UBTF,RCOR1,CREB1,ZBTB7A,EGR1,CREM	chr9	140396351	140397508	chr9	140396351
chr9	140735471	140745287	0.269565217391304	-0.451122071743589	0.911764705882353	0.6	0.392021701238648	0.869306847928494	204	9.65751398400196e-51	*	*	*	InterGenic	*	*	*	*	*	*	*	*	CpG: 15	chr9	140736951	140737163	chr9	140736951	140737163	*	*	*	*	*	0	0	chr9-140742965:140743115	chr9	140742965	140743115	chr9	140742965	140743115	ZMYM3	chr9	140737857	140738237	chr9	140737857
chr9	141121817	141126405	0.202502316960149	-0.119938040551831	0.692307692307692	0.428571428571429	0.741533917571527	0.85878412119291	50	6.63125505353601e-10	chr9	141121554	141134069	Intron3	+	FAM157B	lincRNA	chr9	141121817	141126405	1	0.366600079904115	*	*	*	*	*	0	0	*	*	*	*	*	0	0	*	*	*	*	*	0	0	*	*	*	*	*	0
chr10	276390	277042	-0.242894056847545	-0.342042151603877	0.222222222222222	0.575	0.519646177450092	0.795671965206655	10	0.00774841333230126	chr10	267297	282777	Intron4	+	ZMYND11	protein_coding	chr10	276390	277042	1	0.0421188630490956	*	*	*	*	*	0	0	*	*	*	*	*	0	0	chr10-276720:276970	chr10	276720	276970	chr10	276720	276970	CTCF,ZNF316,MAFK,CUX1,ZNF444,RAD21,TRIM22,ZBTB33,ZNF143	chr10	276458	277449	chr10	276458
chr10	512350	530092	0.208996642135115	-0.309537149563353	0.863636363636364	0.642857142857143	0.519444385181599	0.832371425156465	399	5.8997384350118e-81	chr10	486937	518378	Intron3	-	DIP2C	protein_coding	chr10	512350	518378	0.339758764513584	0.191724181800833	CpG: 23	chr10	518192	518471	chr10	518192	518378	chr10:516106-516519	chr10	516106	516519	chr10	516106	516519	chr10-514925:515075	chr10	514925	515075	chr10	514925	515075	PKNOX1,FOXA1,MEIS2	chr10	515873	516297	chr10	515873
chr10	512350	530092	0.208996642135115	-0.309537149563353	0.863636363636364	0.642857142857143	0.519444385181599	0.832371425156465	399	5.8997384350118e-81	chr10	518379	518489	Exon3	-	DIP2C	protein_coding	chr10	518379	518489	0.00619997745462744	1	CpG: 23	chr10	518192	518471	chr10	518379	518471	*	*	*	*	*	0	0	*	*	*	*	*	0	0	CTCF,EGR1	chr10	518454	518878	chr10	518454
chr10	512350	530092	0.208996642135115	-0.309537149563353	0.863636363636364	0.642857142857143	0.519444385181599	0.832371425156465	399	5.8997384350118e-81	chr10	518490	532398	Intron2	-	DIP2C	protein_coding	chr10	518490	530092	0.653928531168978	0.834196146102962	CpG: 21	chr10	525719	526041	chr10	525719	526041	*	*	*	*	*	0	0	chr10-518520:518815	chr10	518520	518815	chr10	518520	518815	CTCF,EGR1	chr10	518454	518878	chr10	518490
chr10	734518	735259	0.201915184678523	0.0799906412186385	0.473684210526316	0.276819923371648	0.615373285960382	0.502543727222098	73	3.80688906278436e-19	chr10	532471	735433	Intron1	-	DIP2C	protein_coding	chr10	734518	735259	1	0.0036509297306885	CpG: 100	chr10	734707	735606	chr10	734707	735259	*	*	*	*	*	0	0	chr10-733840:735915	chr10	733840	735915	chr10	734518	735259	CTCF,RAD21,SP1,FOXA1,FOXA2,SIN3A,POLR2A,MNT,USF1,MXI1,EP300,YY1,ASH2L,HDAC1,ZFX,TAF1,RBFOX2,RBBP5,RAD21,RNF2,AGO2,HNRNPLL,PHF8,KDM4A,MYC,HDAC2,TAF15,MTA1,CTCF,FUS,YY1,TAF1,SIN3A,MYC,CTCF,USF2,KDM4A,RAD21,HNRNPLL,PHF8,SMC3,EP300,SIN3A,RXRA,ESRRA,ZBTB40	chr10	734038	736649	chr10	734518
chr10	2562691	2565689	0.218954248366013	-0.0249822785161526	0.633971291866029	0.361818181818182	0.653654682481227	0.672024944992196	47	5.01137640811737e-07	chr10	2544182	2608720	Intron1	+	RP11-526P5.2	lincRNA	chr10	2562691	2565689	1	0.0464532523474542	CpG: 108	chr10	2563739	2565222	chr10	2563739	2565222	*	*	*	*	*	0	0	chr10-2562745:2562895	chr10	2562745	2562895	chr10	2562745	2562895	CTCF	chr10	2563026	2563302	chr10	2563026
chr10	18841407	18862444	0.528883183568678	-0.260586973257778	0.826086956521739	0.275	0.507309364962454	0.757499818528898	112	9.20424724416077e-38	chr10	18840901	18874877	Intron8	-	NSUN6	protein_coding	chr10	18841407	18862444	1	0.619172356957853	*	*	*	*	*	0	0	chr10:18860767-18861138	chr10	18860767	18861138	chr10	18860767	18861138	*	*	*	*	*	0	0	*	*	*	*	*	0
chr10	18862548	18870076	0.247252747252748	-0.409520089587234	0.916666666666667	0.676470588235294	0.38003855950487	0.810152341833519	94	9.10933062036437e-25	chr10	18840901	18874877	Intron8	-	NSUN6	protein_coding	chr10	18862548	18870076	1	0.221568165764069	*	*	*	*	*	0	0	*	*	*	*	*	0	0	chr10-18870060:18870210	chr10	18870060	18870210	chr10	18870060	18870076	TRIM28,ZBTB33,CBX5,CBX3,ZNF143,ZNF280A,BHLHE40	chr10	18866714	18867497	chr10	18866714
chr10	38773492	38780499	0.288690476190476	0.707693914706851	0.29520697167756	0	0.761128741713504	0	151	7.61628474835059e-54	*	*	*	InterGenic	*	*	*	*	*	*	*	*	*	*	*	*	*	0	0	*	*	*	*	*	0	0	*	*	*	*	*	0	0	*	*	*	*	*	0
chr10	38780569	38818383	0.458333333333333	0.838165153600358	0.464285714285714	0	0.872778705310717	0	831	2.87756316421477e-291	*	*	*	InterGenic	*	*	*	*	*	*	*	*	*	*	*	*	*	0	0	*	*	*	*	*	0	0	chr10-38790505:38790655	chr10	38790505	38790655	chr10	38790505	38790655	*	*	*	*	*	0
chr10	38818389	38880933	0.255470304063655	0.704996904196616	0.264705882352941	0	0.753525486456923	0.0503656568390379	333	2.46213432639122e-114	*	*	*	InterGenic	*	*	*	*	*	*	*	*	*	*	*	*	*	0	0	*	*	*	*	*	0	0	chr10-38873625:38873835	chr10	38873625	38873835	chr10	38873625	38873835	*	*	*	*	*	0
chr10	39075583	39081114	0.219542167771908	0.499819278956289	0.242647058823529	0	0.623206025396835	0.117922119667854	129	3.01748701525706e-36	*	*	*	InterGenic	*	*	*	*	*	*	*	*	*	*	*	*	*	0	0	*	*	*	*	*	0	0	*	*	*	*	*	0	0	CTCF	chr10	39075896	39076487	chr10	39075896
chr10	39081144	39120583	0.384615384615385	0.720454125450789	0.404545454545455	0	0.805307354611722	0.0623920856244027	905	4.2879937069013e-300	*	*	*	InterGenic	*	*	*	*	*	*	*	*	*	*	*	*	*	0	0	*	*	*	*	*	0	0	chr10-39083265:39083490	chr10	39083265	39083490	chr10	39083265	39083490	*	*	*	*	*	0
chr10	39120613	39154828	0.534403153153153	0.80459985486856	0.540064102564102	0	0.851678844192422	0.0486980833733788	817	9.30918012680782e-281	*	*	*	InterGenic	*	*	*	*	*	*	*	*	*	*	*	*	*	0	0	chr10:39137684-39137764	chr10	39137684	39137764	chr10	39137684	39137764	chr10-39133580:39133730	chr10	39133580	39133730	chr10	39133580	39133730	*	*	*	*	*	0
chr10	39154843	42383238	0.708333333333333	0.630126057726062	0.714285714285714	0	0.640642698295787	0	386	9.23838160626083e-135	*	*	*	InterGenic	*	*	*	*	*	*	*	*	*	*	*	*	*	0	0	chr10:42383153-42384139	chr10	42383153	42384139	chr10	42383153	42383238	chr10-42355400:42355670	chr10	42355400	42355670	chr10	42355400	42355670	*	*	*	*	*	0
chr10	42383248	42397064	0.25476757541975	0.47149159802887	0.323529411764706	0.0594117647058823	0.801896474833457	0.309622712611573	571	4.6555321912404e-137	*	*	*	InterGenic	*	*	*	*	*	*	*	*	*	*	*	*	*	0	0	chr10:42383153-42384139	chr10	42383153	42384139	chr10	42383248	42384139	chr10-42384120:42384270	chr10	42384120	42384270	chr10	42384120	42384270	*	*	*	*	*	0
chr10	42596987	42600333	0.208836996336997	0.284257710242133	0.272727272727273	0.0693664795509222	0.668392188888413	0.309596281815181	135	2.948104591696e-19	*	*	*	InterGenic	*	*	*	*	*	*	*	*	*	*	*	*	*	0	0	*	*	*	*	*	0	0	chr10-42598400:42598610	chr10	42598400	42598610	chr10	42598400	42598610	*	*	*	*	*	0
chr10	42784972	42789610	0.202333877381316	0.219459576216154	0.382783882783883	0.12310606060606	0.716979445864167	0.599657341659174	47	0.000173976242270181	*	*	*	InterGenic	*	*	*	*	*	*	*	*	*	*	*	*	*	0	0	*	*	*	*	*	0	0	*	*	*	*	*	0	0	*	*	*	*	*	0
chr10	42789814	42813429	0.333333333333333	0.706076930605936	0.333333333333333	0	0.761335507028759	0.0424728372641196	498	3.99572168203946e-168	*	*	*	InterGenic	*	*	*	*	*	*	*	*	*	*	*	*	*	0	0	chr10:42798094-42798242	chr10	42798094	42798242	chr10	42798094	42798242	*	*	*	*	*	0	0	*	*	*	*	*	0
chr10	64578567	64578977	0.272727272727273	-0.095792155682331	0.7	0.464285714285714	0.685905823043383	0.73817993487686	38	2.46710759306592e-09	chr10	64575730	64653266	Intron6	-	EGR2	protein_coding	chr10	64578567	64578977	1	0.00528786628146925	CpG: 331	chr10	64574660	64578778	chr10	64578567	64578778	*	*	*	*	*	0	0	chr10-64578305:64578835	chr10	64578305	64578835	chr10	64578567	64578835	RUNX3,EP300,EZH2,PHF8,SIN3A,RBBP5,POLR2A,BACH1,GATAD2B,IKZF1,EGR1,AGO1,HDAC2,RNF2,ASH2L,KDM4A,HNRNPLL,SUZ12,POLR2G,TAF1,HDAC6,MXI1,CHD1,L3MBTL2,MLLT1,NR2F2,NBN,TCF12,ZBTB33,EED,CBX8,ZBTB40,SKIL,TRIM22,SRF,SIN3A,YY1,CBFB,TBX21,NFATC3,EBF1,ESRRA,ZNF687,SMAD1,POLR2A,CUX1,WRNIP1,ZNF143,CREM,TAF1,EP300,SP1,SRF,RBFOX2,TBP,ARID3A,PKNOX1,MXI1,FOXA2,MEIS2,MNT,IRF4,NRF1,ATF7,MITF,PBX3,TEAD4,ELK1,RBM39,MYC,…	chr10	64573760	64579770	chr10	64578567
chr10	72445999	72451500	0.218146718146718	-0.331333708103215	0.833333333333333	0.625	0.536859081110547	0.857106486087028	182	1.34392655506698e-26	chr10	72434752	72462067	Intron2	+	ADAMTS14	protein_coding	chr10	72445999	72451500	1	0.201391177008969	*	*	*	*	*	0	0	*	*	*	*	*	0	0	chr10-72451445:72451610	chr10	72451445	72451610	chr10	72451445	72451500	POLR2G	chr10	72450396	72450782	chr10	72450396
chr10	83532625	83532835	0.226890756302521	-0.317321433952176	0.823529411764706	0.489795918367347	0.530639062229566	0.885905823043383	18	0.00684202132731748	*	*	*	InterGenic	*	*	*	*	*	*	*	*	*	*	*	*	*	0	0	*	*	*	*	*	0	0	*	*	*	*	*	0	0	FOXA2	chr10	83532367	83532767	chr10	83532625
chr10	83637825	83645973	0.206349206349207	0.186399750138039	0.277777777777778	0.0930232558139535	0.694987500240385	0.428928044592237	50	2.06253550317908e-08	chr10	83635920	84118494	Intron1	+	NRG3	protein_coding	chr10	83637825	83645973	1	0.0168844570988076	*	*	*	*	*	0	0	*	*	*	*	*	0	0	chr10-83643445:83643650	chr10	83643445	83643650	chr10	83643445	83643650	RAD51,USF2,MITF	chr10	83645220	83645650	chr10	83645220
chr10	84951475	84952355	-0.212143928035982	-0.397152427680652	0.0794117647058823	0.324587706146927	0.278577409389077	0.741556929882912	13	0.00107330175950798	*	*	*	InterGenic	*	*	*	*	*	*	*	*	*	*	*	*	*	0	0	*	*	*	*	*	0	0	*	*	*	*	*	0	0	*	*	*	*	*	0
chr10	91294780	91295285	0.235294117647059	0.123378128706427	0.5	0.264705882352941	0.63066516234634	0.520495673982491	34	2.95471583731016e-12	chr10	91294398	91295198	Intron1	-	SLC16A12	protein_coding	chr10	91294780	91295198	0.827722772277228	0.5225	CpG: 100	chr10	91294947	91295925	chr10	91294947	91295198	*	*	*	*	*	0	0	chr10-91294580:91295855	chr10	91294580	91295855	chr10	91294780	91295198	EZH2,CHD7,RNF2,ETS1,NANOG,TCF12,POLR2A,KDM4A,POLR2A,FOXA1,PHF8,TCF7L2,RNF2,USF2,ASH2L,POLR2A,SIN3A,USF1,EP300,CTCF,TAF1,RBBP5,TAF7,HDAC2,HNRNPLL,TBP,RAD21,HNF4A	chr10	91293699	91296098	chr10	91294780
chr10	91294780	91295285	0.235294117647059	0.123378128706427	0.5	0.264705882352941	0.63066516234634	0.520495673982491	34	2.95471583731016e-12	chr10	91295199	91295313	FirstExon	-	SLC16A12	protein_coding	chr10	91295199	91295285	0.17029702970297	0.754385964912281	CpG: 100	chr10	91294947	91295925	chr10	91295199	91295285	*	*	*	*	*	0	0	chr10-91294580:91295855	chr10	91294580	91295855	chr10	91295199	91295285	EZH2,CHD7,RNF2,ETS1,NANOG,TCF12,POLR2A,KDM4A,POLR2A,FOXA1,PHF8,TCF7L2,RNF2,USF2,ASH2L,POLR2A,SIN3A,USF1,EP300,CTCF,TAF1,RBBP5,TAF7,HDAC2,HNRNPLL,TBP,RAD21,HNF4A	chr10	91293699	91296098	chr10	91295199
chr10	99004550	99014916	0.212595944552641	-0.324860442001288	0.862068965517241	0.649655469422911	0.540672493309655	0.871865413276608	115	1.19359972034135e-25	chr10	99003917	99006028	Intron7	-	ARHGAP19	protein_coding	chr10	99004550	99006028	0.142581516496238	0.700142112742776	*	*	*	*	*	0	0	*	*	*	*	*	0	0	chr10-99004380:99004570	chr10	99004380	99004570	chr10	99004550	99004570	*	*	*	*	*	0
chr10	99004550	99014916	0.212595944552641	-0.324860442001288	0.862068965517241	0.649655469422911	0.540672493309655	0.871865413276608	115	1.19359972034135e-25	chr10	99006029	99006094	Exon7	-	ARHGAP19	protein_coding	chr10	99006029	99006094	0.00627049971059232	1	*	*	*	*	*	0	0	*	*	*	*	*	0	0	*	*	*	*	*	0	0	*	*	*	*	*	0
chr10	99004550	99014916	0.212595944552641	-0.324860442001288	0.862068965517241	0.649655469422911	0.540672493309655	0.871865413276608	115	1.19359972034135e-25	chr10	99006095	99016074	Intron6	-	ARHGAP19	protein_coding	chr10	99006095	99014916	0.850955045340536	0.883956308247319	*	*	*	*	*	0	0	*	*	*	*	*	0	0	chr10-99009785:99009935	chr10	99009785	99009935	chr10	99009785	99009935	ZMYM3,RBM25	chr10	99014455	99014843	chr10	99014455
chr10	105008159	105013578	0.265644955300128	-0.311890575845836	0.838709677419355	0.557692307692308	0.62123277892908	0.917927407948446	50	3.15666169560564e-12	*	*	*	InterGenic	*	*	*	*	*	*	*	*	*	*	*	*	*	0	0	*	*	*	*	*	0	0	chr10-105011325:105011615	chr10	105011325	105011615	chr10	105011325	105011615	REST	chr10	105010152	105010442	chr10	105010152
chr10	105036706	105037711	0.271062271062272	-0.117628912053656	0.72	0.4375	0.567091530522725	0.675731055793254	138	5.00654071320239e-37	chr10	105035919	105036919	Promoter	+	INA	protein_coding	chr10	105036706	105036919	0.211940298507463	0.213	CpG: 174	chr10	105036628	105038084	chr10	105036706	105036919	*	*	*	*	*	0	0	chr10-105036245:105037815	chr10	105036245	105037815	chr10	105036706	105036919	CTBP1,DPF2,SMARCE1,GATA3,POLR2A,EZH2,TAF7,EP300,TBP,TAF7,SUZ12,PHF8,ZFX,RBBP5,TAF1,ASH2L,MXI1,REST,KDM4A,RBM39,CTCF,TRIM28,HDAC2,HDAC6,GABPA,SMC3,GATA2,SIN3A,L3MBTL2,RAD21,HNRNPLL,SMC3,NR3C1,NR3C1,REST,KDM1A,MIER1,EHMT2,MXI1,SIN3A,NCOR1,HDAC1,AFF1,SAP30,SMARCA4,HDAC2,ZNF143,MAX,NCOA1,MYC,RCOR1,BHLHE40,TCF12	chr10	105035586	105039301	chr10	105036706
chr10	105036706	105037711	0.271062271062272	-0.117628912053656	0.72	0.4375	0.567091530522725	0.675731055793254	138	5.00654071320239e-37	chr10	105036920	105038033	FirstExon	+	INA	protein_coding	chr10	105036920	105037711	0.787064676616915	0.710691823899371	CpG: 174	chr10	105036628	105038084	chr10	105036920	105037711	*	*	*	*	*	0	0	chr10-105036245:105037815	chr10	105036245	105037815	chr10	105036920	105037711	CTBP1,DPF2,SMARCE1,GATA3,POLR2A,EZH2,TAF7,EP300,TBP,TAF7,SUZ12,PHF8,ZFX,RBBP5,TAF1,ASH2L,MXI1,REST,KDM4A,RBM39,CTCF,TRIM28,HDAC2,HDAC6,GABPA,SMC3,GATA2,SIN3A,L3MBTL2,RAD21,HNRNPLL,SMC3,NR3C1,NR3C1,REST,KDM1A,MIER1,EHMT2,MXI1,SIN3A,NCOR1,HDAC1,AFF1,SAP30,SMARCA4,HDAC2,ZNF143,MAX,NCOA1,MYC,RCOR1,BHLHE40,TCF12	chr10	105035586	105039301	chr10	105036920
chr10	133729681	133734634	0.302968227424749	-0.410928505386525	0.875	0.571428571428571	0.436829047702011	0.858128354261575	105	4.05025018264639e-28	*	*	*	InterGenic	*	*	*	*	*	*	*	*	*	*	*	*	*	0	0	*	*	*	*	*	0	0	chr10-133734565:133735075	chr10	133734565	133735075	chr10	133734565	133734634	PKNOX1,NFIC,MLLT1,ARNT,CREM,ATF2,BHLHE40,PAX5,EED,TCF12,ZBTB33,KDM1A,ZNF444	chr10	133734535	133735244	chr10	133734535
chr10	133961725	133964280	0.206093189964157	-0.190278157517319	0.722222222222222	0.5	0.679386560548651	0.861533311181174	78	8.29300129766685e-09	chr10	133961555	133962915	Intron13	+	JAKMIP3	protein_coding	chr10	133961725	133962915	0.465753424657534	0.875	*	*	*	*	*	0	0	*	*	*	*	*	0	0	chr10-133962765:133963210	chr10	133962765	133963210	chr10	133962765	133962915	SP1	chr10	133962806	133963126	chr10	133962806
chr10	133961725	133964280	0.206093189964157	-0.190278157517319	0.722222222222222	0.5	0.679386560548651	0.861533311181174	78	8.29300129766685e-09	chr10	133962916	133963014	Exon14	+	JAKMIP3	protein_coding	chr10	133962916	133963014	0.0383561643835616	1	*	*	*	*	*	0	0	*	*	*	*	*	0	0	chr10-133962765:133963210	chr10	133962765	133963210	chr10	133962916	133963014	SP1	chr10	133962806	133963126	chr10	133962916
chr10	133961725	133964280	0.206093189964157	-0.190278157517319	0.722222222222222	0.5	0.679386560548651	0.861533311181174	78	8.29300129766685e-09	chr10	133963015	133963485	Intron14	+	JAKMIP3	protein_coding	chr10	133963015	133963485	0.183953033268102	1	*	*	*	*	*	0	0	*	*	*	*	*	0	0	chr10-133962765:133963210	chr10	133962765	133963210	chr10	133963015	133963210	SP1	chr10	133962806	133963126	chr10	133963015
chr10	133961725	133964280	0.206093189964157	-0.190278157517319	0.722222222222222	0.5	0.679386560548651	0.861533311181174	78	8.29300129766685e-09	chr10	133963486	133963539	Exon15	+	JAKMIP3	protein_coding	chr10	133963486	133963539	0.0207436399217221	1	*	*	*	*	*	0	0	*	*	*	*	*	0	0	*	*	*	*	*	0	0	*	*	*	*	*	0
chr10	133961725	133964280	0.206093189964157	-0.190278157517319	0.722222222222222	0.5	0.679386560548651	0.861533311181174	78	8.29300129766685e-09	chr10	133963540	133966461	Intron15	+	JAKMIP3	protein_coding	chr10	133963540	133964280	0.289628180039139	0.253337897980144	*	*	*	*	*	0	0	*	*	*	*	*	0	0	*	*	*	*	*	0	0	ARNT,LCORL,PLRG1,FOXP1,ZBTB33	chr10	133964256	133964774	chr10	133964256
chr10	133994061	133994289	0.363636363636364	-0.452259883149013	0.966666666666667	0.542857142857143	0.167752778258549	0.638113727870784	22	2.52360075449606e-08	chr10	133983757	133995860	Intron23	+	JAKMIP3	protein_coding	chr10	133994061	133994289	1	0.0188383045525903	*	*	*	*	*	0	0	*	*	*	*	*	0	0	*	*	*	*	*	0	0	NFATC1,BCL3,MNT	chr10	133994063	133994830	chr10	133994063
chr10	134169776	134174112	0.217073170731707	-0.466880419390359	0.909090909090909	0.674418604651163	0.364971439470699	0.843976047603659	106	1.20374726887456e-24	chr10	134169391	134174960	Intron8	+	LRRC27	protein_coding	chr10	134169776	134174112	1	0.778595798168432	*	*	*	*	*	0	0	*	*	*	*	*	0	0	chr10-134172645:134173535	chr10	134172645	134173535	chr10	134172645	134173535	CTCF,XRCC5,ZNF316,MYC,GABPA,TRIM22,ZNF143,RB1,CREM,SMC3,RAD21,MAX,ZNF579,GATA2	chr10	134173865	134175177	chr10	134173865
chr10	134632052	134639630	0.211764705882353	-0.174350394495852	0.714285714285714	0.470588235294118	0.686271296777067	0.875867103837352	96	5.60689242410111e-10	chr10	134628419	134646861	Intron50	-	TTC40	protein_coding	chr10	134632052	134639630	1	0.410909879622601	*	*	*	*	*	0	0	chr10:134638718-134639092	chr10	134638718	134639092	chr10	134638718	134639092	chr10-134639245:134639455	chr10	134639245	134639455	chr10	134639245	134639455	RBM39,EGR1,EGR1	chr10	134639538	134640815	chr10	134639538
chr10	134731995	134732439	0.235294117647059	0.360670685251038	0.235294117647059	0.0769230769230769	0.618095290662415	0.365265085000311	14	0.0453895416371495	chr10	134731897	134732024	Exon16	-	TTC40	protein_coding	chr10	134731995	134732024	0.0653153153153153	0.228346456692913	CpG: 49	chr10	134731433	134732013	chr10	134731995	134732013	*	*	*	*	*	0	0	chr10-134731965:134732515	chr10	134731965	134732515	chr10	134731995	134732024	NFIB,ESR1	chr10	134732021	134732449	chr10	134732021
chr10	134731995	134732439	0.235294117647059	0.360670685251038	0.235294117647059	0.0769230769230769	0.618095290662415	0.365265085000311	14	0.0453895416371495	chr10	134732025	134732818	Intron15	-	TTC40	protein_coding	chr10	134732025	134732439	0.932432432432432	0.522068095838588	*	*	*	*	*	0	0	*	*	*	*	*	0	0	chr10-134731965:134732515	chr10	134731965	134732515	chr10	134732025	134732439	NFIB,ESR1	chr10	134732021	134732449	chr10	134732025
chr10	134797689	134799771	0.21517094017094	0.028595825672164	0.544230769230769	0.285714285714286	0.797701420017543	0.772767290298453	61	7.64277312555231e-06	*	*	*	InterGenic	*	*	*	*	*	*	*	*	*	*	*	*	*	0	0	*	*	*	*	*	0	0	chr10-134799005:134799195	chr10	134799005	134799195	chr10	134799005	134799195	REST,RAD21,CTCF,GATA3,ZNF444	chr10	134798159	134799013	chr10	134798159
chr10	135138682	135139887	0.200378787878788	-0.169540354590961	0.7	0.482758620689655	0.640410062828726	0.802064182769834	121	3.75041712515685e-19	chr10	135138250	135139250	Promoter	-	RP11-122K13.14	lincRNA	chr10	135138682	135139250	0.471369294605809	0.568	CpG: 105	chr10	135138682	135139717	chr10	135138682	135139250	*	*	*	*	*	0	0	chr10-135139185:135140155	chr10	135139185	135140155	chr10	135139185	135139250	MNT,RXRA,PHF8,MXI1,HNF4A,RCOR1,SP1,NFIC,POLR2A,NFIB,YY1,ZNF184,ZBTB7A,MYC,GABPB1,GABPA,EGR1,MXI1,EZH2,YY1,E4F1,CREB1,SUZ12,HDAC6,CTCF,PHF8,RBBP5,ZFX,HNRNPLL,KDM4A,YY1,RBM39,RNF2,ESR1,NR3C1,ESR1,CTCF,BHLHE40,TAF15,FOXA1,FOS,JUND,ESR1,NFIC	chr10	135137484	135141788	chr10	135138682
chr10	135138682	135139887	0.200378787878788	-0.169540354590961	0.7	0.482758620689655	0.640410062828726	0.802064182769834	121	3.75041712515685e-19	chr10	135138927	135139070	LastExon	-	CALY	protein_coding	chr10	135138927	135139070	0.118672199170124	1	CpG: 105	chr10	135138682	135139717	chr10	135138927	135139070	*	*	*	*	*	0	0	chr10-135138885:135139175	chr10	135138885	135139175	chr10	135138927	135139070	MNT,RXRA,PHF8,MXI1,HNF4A,RCOR1,SP1,NFIC,POLR2A,NFIB,YY1,ZNF184,ZBTB7A,MYC,GABPB1,GABPA,EGR1,MXI1,EZH2,YY1,E4F1,CREB1,SUZ12,HDAC6,CTCF,PHF8,RBBP5,ZFX,HNRNPLL,KDM4A,YY1,RBM39,RNF2,ESR1,NR3C1,ESR1,CTCF,BHLHE40,TAF15,FOXA1,FOS,JUND,ESR1,NFIC	chr10	135137484	135141788	chr10	135138927
chr10	135138682	135139887	0.200378787878788	-0.169540354590961	0.7	0.482758620689655	0.640410062828726	0.802064182769834	121	3.75041712515685e-19	chr10	135139071	135139302	Intron5	-	CALY	protein_coding	chr10	135139071	135139302	0.191701244813278	1	CpG: 105	chr10	135138682	135139717	chr10	135139071	135139302	*	*	*	*	*	0	0	chr10-135139185:135140155	chr10	135139185	135140155	chr10	135139185	135139302	MNT,RXRA,PHF8,MXI1,HNF4A,RCOR1,SP1,NFIC,POLR2A,NFIB,YY1,ZNF184,ZBTB7A,MYC,GABPB1,GABPA,EGR1,MXI1,EZH2,YY1,E4F1,CREB1,SUZ12,HDAC6,CTCF,PHF8,RBBP5,ZFX,HNRNPLL,KDM4A,YY1,RBM39,RNF2,ESR1,NR3C1,ESR1,CTCF,BHLHE40,TAF15,FOXA1,FOS,JUND,ESR1,NFIC	chr10	135137484	135141788	chr10	135139071
chr10	135138682	135139887	0.200378787878788	-0.169540354590961	0.7	0.482758620689655	0.640410062828726	0.802064182769834	121	3.75041712515685e-19	chr10	135139303	135139624	Exon5	-	CALY	protein_coding	chr10	135139303	135139624	0.266390041493776	1	CpG: 105	chr10	135138682	135139717	chr10	135139303	135139624	*	*	*	*	*	0	0	chr10-135139185:135140155	chr10	135139185	135140155	chr10	135139303	135139624	MNT,RXRA,PHF8,MXI1,HNF4A,RCOR1,SP1,NFIC,POLR2A,NFIB,YY1,ZNF184,ZBTB7A,MYC,GABPB1,GABPA,EGR1,MXI1,EZH2,YY1,E4F1,CREB1,SUZ12,HDAC6,CTCF,PHF8,RBBP5,ZFX,HNRNPLL,KDM4A,YY1,RBM39,RNF2,ESR1,NR3C1,ESR1,CTCF,BHLHE40,TAF15,FOXA1,FOS,JUND,ESR1,NFIC	chr10	135137484	135141788	chr10	135139303
chr10	135138682	135139887	0.200378787878788	-0.169540354590961	0.7	0.482758620689655	0.640410062828726	0.802064182769834	121	3.75041712515685e-19	chr10	135139625	135140381	Intron4	-	CALY	protein_coding	chr10	135139625	135139887	0.217427385892116	0.346560846560847	CpG: 105	chr10	135138682	135139717	chr10	135139625	135139717	*	*	*	*	*	0	0	chr10-135139185:135140155	chr10	135139185	135140155	chr10	135139625	135139887	MNT,RXRA,PHF8,MXI1,HNF4A,RCOR1,SP1,NFIC,POLR2A,NFIB,YY1,ZNF184,ZBTB7A,MYC,GABPB1,GABPA,EGR1,MXI1,EZH2,YY1,E4F1,CREB1,SUZ12,HDAC6,CTCF,PHF8,RBBP5,ZFX,HNRNPLL,KDM4A,YY1,RBM39,RNF2,ESR1,NR3C1,ESR1,CTCF,BHLHE40,TAF15,FOXA1,FOS,JUND,ESR1,NFIC	chr10	135137484	135141788	chr10	135139625
chr10	135146576	135148425	0.248917748917749	0.031678679906488	0.615384615384615	0.333333333333333	0.784511316192494	0.791669303354509	60	1.30487288534012e-06	chr10	135142514	135150337	Intron1	-	CALY	protein_coding	chr10	135146576	135148425	1	0.236354339767353	CpG: 196	chr10	135148196	135150565	chr10	135148196	135148425	*	*	*	*	*	0	0	chr10-135148285:135149835	chr10	135148285	135149835	chr10	135148285	135148425	EZH2,EGR1,PCBP1,MGA,SUZ12,RNF2,HNRNPLL,MAX,USF1,RFX1,E4F1,SIN3A,E2F1,ATF2,BMI1,CREM,MXI1,RFX5,EP300,NRF1,SP1,GMEB1,GATAD2B,NFIC,SAFB,HDAC2,EBF1,PKNOX1,EGR1,MAX,CREM,HNF4A,ZBTB7A,ELF1,NFE2,NFE2L2,CREB1,TCF12,SUZ12,RNF2,ZBTB33,RFX1,NRF1,BMI1,EGR1,POLR2A,NBN,ZBTB2,ZNF639,CBFA2T2,PHF20,PBX3,ZNF280A,CDC5L,EZH2,CREB1,MNT,USF2,BCL3	chr10	135147957	135151266	chr10	135147957
chr10	135150784	135155144	0.200588235294117	-0.174881239982015	0.739130434782609	0.514474772539289	0.761244070591041	0.893124769333211	85	1.41951500343395e-09	chr10	135150412	135151412	Promoter	-	CALY	protein_coding	chr10	135150784	135151412	0.144036697247706	0.628	*	*	*	*	*	0	0	*	*	*	*	*	0	0	chr10-135151225:135151395	chr10	135151225	135151395	chr10	135151225	135151395	EZH2,EGR1,PCBP1,MGA,SUZ12,RNF2,HNRNPLL,MAX,USF1,RFX1,E4F1,SIN3A,E2F1,ATF2,BMI1,CREM,MXI1,RFX5,EP300,NRF1,SP1,GMEB1,GATAD2B,NFIC,SAFB,HDAC2,EBF1,PKNOX1,EGR1,MAX,CREM,HNF4A,ZBTB7A,ELF1,NFE2,NFE2L2,CREB1,TCF12,SUZ12,RNF2,ZBTB33,RFX1,NRF1,BMI1,EGR1,POLR2A,NBN,ZBTB2,ZNF639,CBFA2T2,PHF20,PBX3,ZNF280A,CDC5L,EZH2,CREB1,MNT,USF2,BCL3	chr10	135147957	135151266	chr10	135150784
chr10	135523471	135524435	0.203443703240451	-0.360920511807285	0.868421052631579	0.658823529411765	0.48016874928798	0.842573298122144	103	1.83073839537033e-23	*	*	*	InterGenic	*	*	*	*	*	*	*	*	*	*	*	*	*	0	0	*	*	*	*	*	0	0	chr10-135524325:135524730	chr10	135524325	135524730	chr10	135524325	135524435	ESRRA,NBN,NR2F2	chr10	135524310	135524646	chr10	135524310
chr11	370258	382375	0.202429149797571	-0.306373065398924	0.866666666666667	0.653846153846154	0.485808293803057	0.808130237528084	538	6.74924792398313e-92	chr11	369955	372108	Intron1	+	B4GALNT4	protein_coding	chr11	370258	372108	0.152678055624329	0.859266140269392	*	*	*	*	*	0	0	*	*	*	*	*	0	0	chr11-369685:370355	chr11	369685	370355	chr11	370258	370355	ASH2L,EGR1,AGO1,SIN3A,HNRNPLL,CTCF,HNRNPL,EZH2,POLR2A,REST,ZBTB40,TFAP4,KDM5B,E2F6,TAF1,HNRNPK,YY1,RBBP5,EGR1,PHF8,HNRNPLL,MYC,JUND,POLR2G,E2F6,MAX,ZBTB7A,TBP,POLR2A,RBFOX2,AGO1,EP300,TAF1,CREB1,TAF15,YY1,CTCF,ZBTB7A,ZBTB7A	chr11	368137	371231	chr11	370258
chr11	370258	382375	0.202429149797571	-0.306373065398924	0.866666666666667	0.653846153846154	0.485808293803057	0.808130237528084	538	6.74924792398313e-92	chr11	372109	372212	Exon2	+	B4GALNT4	protein_coding	chr11	372109	372212	0.00850045390773294	1	*	*	*	*	*	0	0	*	*	*	*	*	0	0	chr11-370885:372155	chr11	370885	372155	chr11	372109	372155	CTCF,HNRNPLL,RBM39,TAF15,HNRNPL,AGO2,NR2F6,PCBP1,REST,CHD4,ETV4,CTCF,ZBTB7A,ASH2L,KDM1A,NRF1,XRCC5,CREM,POLR2G,RBM39,NR2F6,REST,SP1,HDAC2,EP300,TBP,RXRA,HNF4A,HNRNPL,HNF4G,HNRNPH1,PCBP1,ELF1,POLR2A,TAF15,RBFOX2,ZBTB7A	chr11	371674	374769	chr11	372109
chr11	370258	382375	0.202429149797571	-0.306373065398924	0.866666666666667	0.653846153846154	0.485808293803057	0.808130237528084	538	6.74924792398313e-92	chr11	372213	372661	Intron2	+	B4GALNT4	protein_coding	chr11	372213	372661	0.0369728480647025	1	*	*	*	*	*	0	0	*	*	*	*	*	0	0	chr11-372185:372335	chr11	372185	372335	chr11	372213	372335	CTCF,HNRNPLL,RBM39,TAF15,HNRNPL,AGO2,NR2F6,PCBP1,REST,CHD4,ETV4,CTCF,ZBTB7A,ASH2L,KDM1A,NRF1,XRCC5,CREM,POLR2G,RBM39,NR2F6,REST,SP1,HDAC2,EP300,TBP,RXRA,HNF4A,HNRNPL,HNF4G,HNRNPH1,PCBP1,ELF1,POLR2A,TAF15,RBFOX2,ZBTB7A	chr11	371674	374769	chr11	372213
chr11	370258	382375	0.202429149797571	-0.306373065398924	0.866666666666667	0.653846153846154	0.485808293803057	0.808130237528084	538	6.74924792398313e-92	chr11	372662	372754	Exon3	+	B4GALNT4	protein_coding	chr11	372662	372754	0.00759263844185855	1	*	*	*	*	*	0	0	*	*	*	*	*	0	0	chr11-372525:372715	chr11	372525	372715	chr11	372662	372715	CTCF,HNRNPLL,RBM39,TAF15,HNRNPL,AGO2,NR2F6,PCBP1,REST,CHD4,ETV4,CTCF,ZBTB7A,ASH2L,KDM1A,NRF1,XRCC5,CREM,POLR2G,RBM39,NR2F6,REST,SP1,HDAC2,EP300,TBP,RXRA,HNF4A,HNRNPL,HNF4G,HNRNPH1,PCBP1,ELF1,POLR2A,TAF15,RBFOX2,ZBTB7A	chr11	371674	374769	chr11	372662
chr11	370258	382375	0.202429149797571	-0.306373065398924	0.866666666666667	0.653846153846154	0.485808293803057	0.808130237528084	538	6.74924792398313e-92	chr11	372755	372851	Intron3	+	B4GALNT4	protein_coding	chr11	372755	372851	0.00792275315672196	1	*	*	*	*	*	0	0	*	*	*	*	*	0	0	chr11-372745:372915	chr11	372745	372915	chr11	372755	372851	CTCF,HNRNPLL,RBM39,TAF15,HNRNPL,AGO2,NR2F6,PCBP1,REST,CHD4,ETV4,CTCF,ZBTB7A,ASH2L,KDM1A,NRF1,XRCC5,CREM,POLR2G,RBM39,NR2F6,REST,SP1,HDAC2,EP300,TBP,RXRA,HNF4A,HNRNPL,HNF4G,HNRNPH1,PCBP1,ELF1,POLR2A,TAF15,RBFOX2,ZBTB7A	chr11	371674	374769	chr11	372755
chr11	370258	382375	0.202429149797571	-0.306373065398924	0.866666666666667	0.653846153846154	0.485808293803057	0.808130237528084	538	6.74924792398313e-92	chr11	372852	372947	Exon4	+	B4GALNT4	protein_coding	chr11	372852	372947	0.00784022447800611	1	*	*	*	*	*	0	0	*	*	*	*	*	0	0	chr11-372745:372915	chr11	372745	372915	chr11	372852	372915	CTCF,HNRNPLL,RBM39,TAF15,HNRNPL,AGO2,NR2F6,PCBP1,REST,CHD4,ETV4,CTCF,ZBTB7A,ASH2L,KDM1A,NRF1,XRCC5,CREM,POLR2G,RBM39,NR2F6,REST,SP1,HDAC2,EP300,TBP,RXRA,HNF4A,HNRNPL,HNF4G,HNRNPH1,PCBP1,ELF1,POLR2A,TAF15,RBFOX2,ZBTB7A	chr11	371674	374769	chr11	372852
chr11	370258	382375	0.202429149797571	-0.306373065398924	0.866666666666667	0.653846153846154	0.485808293803057	0.808130237528084	538	6.74924792398313e-92	chr11	372948	373025	Intron4	+	B4GALNT4	protein_coding	chr11	372948	373025	0.00635470826112074	1	*	*	*	*	*	0	0	*	*	*	*	*	0	0	*	*	*	*	*	0	0	CTCF,HNRNPLL,RBM39,TAF15,HNRNPL,AGO2,NR2F6,PCBP1,REST,CHD4,ETV4,CTCF,ZBTB7A,ASH2L,KDM1A,NRF1,XRCC5,CREM,POLR2G,RBM39,NR2F6,REST,SP1,HDAC2,EP300,TBP,RXRA,HNF4A,HNRNPL,HNF4G,HNRNPH1,PCBP1,ELF1,POLR2A,TAF15,RBFOX2,ZBTB7A	chr11	371674	374769	chr11	372948
chr11	370258	382375	0.202429149797571	-0.306373065398924	0.866666666666667	0.653846153846154	0.485808293803057	0.808130237528084	538	6.74924792398313e-92	chr11	373026	373116	Exon5	+	B4GALNT4	protein_coding	chr11	373026	373116	0.00742758108442684	1	*	*	*	*	*	0	0	*	*	*	*	*	0	0	chr11-373105:373775	chr11	373105	373775	chr11	373105	373116	CTCF,HNRNPLL,RBM39,TAF15,HNRNPL,AGO2,NR2F6,PCBP1,REST,CHD4,ETV4,CTCF,ZBTB7A,ASH2L,KDM1A,NRF1,XRCC5,CREM,POLR2G,RBM39,NR2F6,REST,SP1,HDAC2,EP300,TBP,RXRA,HNF4A,HNRNPL,HNF4G,HNRNPH1,PCBP1,ELF1,POLR2A,TAF15,RBFOX2,ZBTB7A	chr11	371674	374769	chr11	373026
chr11	370258	382375	0.202429149797571	-0.306373065398924	0.866666666666667	0.653846153846154	0.485808293803057	0.808130237528084	538	6.74924792398313e-92	chr11	373117	373190	Intron5	+	B4GALNT4	protein_coding	chr11	373117	373190	0.00602459354625732	1	*	*	*	*	*	0	0	*	*	*	*	*	0	0	chr11-373105:373775	chr11	373105	373775	chr11	373117	373190	CTCF,HNRNPLL,RBM39,TAF15,HNRNPL,AGO2,NR2F6,PCBP1,REST,CHD4,ETV4,CTCF,ZBTB7A,ASH2L,KDM1A,NRF1,XRCC5,CREM,POLR2G,RBM39,NR2F6,REST,SP1,HDAC2,EP300,TBP,RXRA,HNF4A,HNRNPL,HNF4G,HNRNPH1,PCBP1,ELF1,POLR2A,TAF15,RBFOX2,ZBTB7A	chr11	371674	374769	chr11	373117
chr11	370258	382375	0.202429149797571	-0.306373065398924	0.866666666666667	0.653846153846154	0.485808293803057	0.808130237528084	538	6.74924792398313e-92	chr11	373191	373291	Exon6	+	B4GALNT4	protein_coding	chr11	373191	373291	0.00825286787158538	1	*	*	*	*	*	0	0	*	*	*	*	*	0	0	chr11-373105:373775	chr11	373105	373775	chr11	373191	373291	CTCF,HNRNPLL,RBM39,TAF15,HNRNPL,AGO2,NR2F6,PCBP1,REST,CHD4,ETV4,CTCF,ZBTB7A,ASH2L,KDM1A,NRF1,XRCC5,CREM,POLR2G,RBM39,NR2F6,REST,SP1,HDAC2,EP300,TBP,RXRA,HNF4A,HNRNPL,HNF4G,HNRNPH1,PCBP1,ELF1,POLR2A,TAF15,RBFOX2,ZBTB7A	chr11	371674	374769	chr11	373191
chr11	370258	382375	0.202429149797571	-0.306373065398924	0.866666666666667	0.653846153846154	0.485808293803057	0.808130237528084	538	6.74924792398313e-92	chr11	373292	373448	Intron6	+	B4GALNT4	protein_coding	chr11	373292	373448	0.0128744738796732	1	*	*	*	*	*	0	0	*	*	*	*	*	0	0	chr11-373105:373775	chr11	373105	373775	chr11	373292	373448	CTCF,HNRNPLL,RBM39,TAF15,HNRNPL,AGO2,NR2F6,PCBP1,REST,CHD4,ETV4,CTCF,ZBTB7A,ASH2L,KDM1A,NRF1,XRCC5,CREM,POLR2G,RBM39,NR2F6,REST,SP1,HDAC2,EP300,TBP,RXRA,HNF4A,HNRNPL,HNF4G,HNRNPH1,PCBP1,ELF1,POLR2A,TAF15,RBFOX2,ZBTB7A	chr11	371674	374769	chr11	373292
chr11	370258	382375	0.202429149797571	-0.306373065398924	0.866666666666667	0.653846153846154	0.485808293803057	0.808130237528084	538	6.74924792398313e-92	chr11	373449	373516	Exon7	+	B4GALNT4	protein_coding	chr11	373449	373516	0.0055294214739622	1	*	*	*	*	*	0	0	*	*	*	*	*	0	0	chr11-373105:373775	chr11	373105	373775	chr11	373449	373516	CTCF,HNRNPLL,RBM39,TAF15,HNRNPL,AGO2,NR2F6,PCBP1,REST,CHD4,ETV4,CTCF,ZBTB7A,ASH2L,KDM1A,NRF1,XRCC5,CREM,POLR2G,RBM39,NR2F6,REST,SP1,HDAC2,EP300,TBP,RXRA,HNF4A,HNRNPL,HNF4G,HNRNPH1,PCBP1,ELF1,POLR2A,TAF15,RBFOX2,ZBTB7A	chr11	371674	374769	chr11	373449
chr11	370258	382375	0.202429149797571	-0.306373065398924	0.866666666666667	0.653846153846154	0.485808293803057	0.808130237528084	538	6.74924792398313e-92	chr11	373517	373749	Intron7	+	B4GALNT4	protein_coding	chr11	373517	373749	0.0191466534620781	1	*	*	*	*	*	0	0	*	*	*	*	*	0	0	chr11-373105:373775	chr11	373105	373775	chr11	373517	373749	CTCF,HNRNPLL,RBM39,TAF15,HNRNPL,AGO2,NR2F6,PCBP1,REST,CHD4,ETV4,CTCF,ZBTB7A,ASH2L,KDM1A,NRF1,XRCC5,CREM,POLR2G,RBM39,NR2F6,REST,SP1,HDAC2,EP300,TBP,RXRA,HNF4A,HNRNPL,HNF4G,HNRNPH1,PCBP1,ELF1,POLR2A,TAF15,RBFOX2,ZBTB7A	chr11	371674	374769	chr11	373517
chr11	370258	382375	0.202429149797571	-0.306373065398924	0.866666666666667	0.653846153846154	0.485808293803057	0.808130237528084	538	6.74924792398313e-92	chr11	373750	373828	Exon8	+	B4GALNT4	protein_coding	chr11	373750	373828	0.00643723693983659	1	*	*	*	*	*	0	0	*	*	*	*	*	0	0	chr11-373105:373775	chr11	373105	373775	chr11	373750	373775	CTCF,HNRNPLL,RBM39,TAF15,HNRNPL,AGO2,NR2F6,PCBP1,REST,CHD4,ETV4,CTCF,ZBTB7A,ASH2L,KDM1A,NRF1,XRCC5,CREM,POLR2G,RBM39,NR2F6,REST,SP1,HDAC2,EP300,TBP,RXRA,HNF4A,HNRNPL,HNF4G,HNRNPH1,PCBP1,ELF1,POLR2A,TAF15,RBFOX2,ZBTB7A	chr11	371674	374769	chr11	373750
chr11	370258	382375	0.202429149797571	-0.306373065398924	0.866666666666667	0.653846153846154	0.485808293803057	0.808130237528084	538	6.74924792398313e-92	chr11	373829	375460	Intron8	+	B4GALNT4	protein_coding	chr11	373829	375460	0.134604274985557	1	*	*	*	*	*	0	0	*	*	*	*	*	0	0	chr11-374085:374595	chr11	374085	374595	chr11	374085	374595	CTCF,HNRNPLL,RBM39,TAF15,HNRNPL,AGO2,NR2F6,PCBP1,REST,CHD4,ETV4,CTCF,ZBTB7A,ASH2L,KDM1A,NRF1,XRCC5,CREM,POLR2G,RBM39,NR2F6,REST,SP1,HDAC2,EP300,TBP,RXRA,HNF4A,HNRNPL,HNF4G,HNRNPH1,PCBP1,ELF1,POLR2A,TAF15,RBFOX2,ZBTB7A	chr11	371674	374769	chr11	373829
chr11	370258	382375	0.202429149797571	-0.306373065398924	0.866666666666667	0.653846153846154	0.485808293803057	0.808130237528084	538	6.74924792398313e-92	chr11	375461	375527	Exon9	+	B4GALNT4	protein_coding	chr11	375461	375527	0.00544689279524635	1	*	*	*	*	*	0	0	*	*	*	*	*	0	0	chr11-375265:375975	chr11	375265	375975	chr11	375461	375527	HNRNPK,PCBP2,RBFOX2,ZBTB33,AGO2	chr11	374993	375995	chr11	375461
chr11	370258	382375	0.202429149797571	-0.306373065398924	0.866666666666667	0.653846153846154	0.485808293803057	0.808130237528084	538	6.74924792398313e-92	chr11	375528	375638	Intron9	+	B4GALNT4	protein_coding	chr11	375528	375638	0.00907815465874391	1	*	*	*	*	*	0	0	*	*	*	*	*	0	0	chr11-375265:375975	chr11	375265	375975	chr11	375528	375638	HNRNPK,PCBP2,RBFOX2,ZBTB33,AGO2	chr11	374993	375995	chr11	375528
chr11	370258	382375	0.202429149797571	-0.306373065398924	0.866666666666667	0.653846153846154	0.485808293803057	0.808130237528084	538	6.74924792398313e-92	chr11	375639	375773	Exon10	+	B4GALNT4	protein_coding	chr11	375639	375773	0.0110588429479244	1	*	*	*	*	*	0	0	*	*	*	*	*	0	0	chr11-375265:375975	chr11	375265	375975	chr11	375639	375773	HNRNPK,PCBP2,RBFOX2,ZBTB33,AGO2	chr11	374993	375995	chr11	375639
chr11	370258	382375	0.202429149797571	-0.306373065398924	0.866666666666667	0.653846153846154	0.485808293803057	0.808130237528084	538	6.74924792398313e-92	chr11	375774	375846	Intron10	+	B4GALNT4	protein_coding	chr11	375774	375846	0.00594206486754147	1	*	*	*	*	*	0	0	*	*	*	*	*	0	0	chr11-375265:375975	chr11	375265	375975	chr11	375774	375846	HNRNPK,PCBP2,RBFOX2,ZBTB33,AGO2	chr11	374993	375995	chr11	375774
chr11	370258	382375	0.202429149797571	-0.306373065398924	0.866666666666667	0.653846153846154	0.485808293803057	0.808130237528084	538	6.74924792398313e-92	chr11	375847	375956	Exon11	+	B4GALNT4	protein_coding	chr11	375847	375956	0.00899562598002806	1	CpG: 151	chr11	375851	377380	chr11	375851	375956	*	*	*	*	*	0	0	chr11-375265:375975	chr11	375265	375975	chr11	375847	375956	HNRNPK,PCBP2,RBFOX2,ZBTB33,AGO2	chr11	374993	375995	chr11	375847
chr11	370258	382375	0.202429149797571	-0.306373065398924	0.866666666666667	0.653846153846154	0.485808293803057	0.808130237528084	538	6.74924792398313e-92	chr11	375957	376073	Intron11	+	B4GALNT4	protein_coding	chr11	375957	376073	0.00957332673103904	1	CpG: 151	chr11	375851	377380	chr11	375957	376073	*	*	*	*	*	0	0	chr11-375265:375975	chr11	375265	375975	chr11	375957	375975	HNRNPK,PCBP2,RBFOX2,ZBTB33,AGO2	chr11	374993	375995	chr11	375957
chr11	370258	382375	0.202429149797571	-0.306373065398924	0.866666666666667	0.653846153846154	0.485808293803057	0.808130237528084	538	6.74924792398313e-92	chr11	376074	376174	Exon12	+	B4GALNT4	protein_coding	chr11	376074	376174	0.00825286787158538	1	CpG: 151	chr11	375851	377380	chr11	376074	376174	*	*	*	*	*	0	0	chr11-376045:376195	chr11	376045	376195	chr11	376074	376174	*	*	*	*	*	0
chr11	370258	382375	0.202429149797571	-0.306373065398924	0.866666666666667	0.653846153846154	0.485808293803057	0.808130237528084	538	6.74924792398313e-92	chr11	376175	376250	Intron12	+	B4GALNT4	protein_coding	chr11	376175	376250	0.00618965090368903	1	CpG: 151	chr11	375851	377380	chr11	376175	376250	*	*	*	*	*	0	0	chr11-376045:376195	chr11	376045	376195	chr11	376175	376195	*	*	*	*	*	0
chr11	370258	382375	0.202429149797571	-0.306373065398924	0.866666666666667	0.653846153846154	0.485808293803057	0.808130237528084	538	6.74924792398313e-92	chr11	376251	376351	Exon13	+	B4GALNT4	protein_coding	chr11	376251	376351	0.00825286787158538	1	CpG: 151	chr11	375851	377380	chr11	376251	376351	*	*	*	*	*	0	0	chr11-376265:376415	chr11	376265	376415	chr11	376265	376351	RBFOX2,AGO2,ZBTB33	chr11	376334	377646	chr11	376334
chr11	370258	382375	0.202429149797571	-0.306373065398924	0.866666666666667	0.653846153846154	0.485808293803057	0.808130237528084	538	6.74924792398313e-92	chr11	376352	376420	Intron13	+	B4GALNT4	protein_coding	chr11	376352	376420	0.00561195015267806	1	CpG: 151	chr11	375851	377380	chr11	376352	376420	*	*	*	*	*	0	0	chr11-376265:376415	chr11	376265	376415	chr11	376352	376415	RBFOX2,AGO2,ZBTB33	chr11	376334	377646	chr11	376352
chr11	370258	382375	0.202429149797571	-0.306373065398924	0.866666666666667	0.653846153846154	0.485808293803057	0.808130237528084	538	6.74924792398313e-92	chr11	376421	377327	Exon14	+	B4GALNT4	protein_coding	chr11	376421	377327	0.0747709829165635	1	CpG: 151	chr11	375851	377380	chr11	376421	377327	*	*	*	*	*	0	0	chr11-376485:376855	chr11	376485	376855	chr11	376485	376855	RBFOX2,AGO2,ZBTB33	chr11	376334	377646	chr11	376421
chr11	370258	382375	0.202429149797571	-0.306373065398924	0.866666666666667	0.653846153846154	0.485808293803057	0.808130237528084	538	6.74924792398313e-92	chr11	377328	379417	Intron14	+	B4GALNT4	protein_coding	chr11	377328	379417	0.172402409837419	1	CpG: 151	chr11	375851	377380	chr11	377328	377380	*	*	*	*	*	0	0	chr11-377280:377635	chr11	377280	377635	chr11	377328	377635	RBFOX2,AGO2,ZBTB33	chr11	376334	377646	chr11	377328
chr11	370258	382375	0.202429149797571	-0.306373065398924	0.866666666666667	0.653846153846154	0.485808293803057	0.808130237528084	538	6.74924792398313e-92	chr11	379418	379701	Exon15	+	B4GALNT4	protein_coding	chr11	379418	379701	0.0233556160765866	1	CpG: 140	chr11	379295	380768	chr11	379418	379701	*	*	*	*	*	0	0	chr11-378725:380375	chr11	378725	380375	chr11	379418	379701	AGO1,RBFOX2,AGO2,ZBTB33,POLR2A,POLR2G,TAF15,AGO1	chr11	379005	380851	chr11	379418
chr11	370258	382375	0.202429149797571	-0.306373065398924	0.866666666666667	0.653846153846154	0.485808293803057	0.808130237528084	538	6.74924792398313e-92	chr11	379702	379865	Intron15	+	B4GALNT4	protein_coding	chr11	379702	379865	0.0134521746306842	1	CpG: 140	chr11	379295	380768	chr11	379702	379865	*	*	*	*	*	0	0	chr11-378725:380375	chr11	378725	380375	chr11	379702	379865	AGO1,RBFOX2,AGO2,ZBTB33,POLR2A,POLR2G,TAF15,AGO1	chr11	379005	380851	chr11	379702
chr11	370258	382375	0.202429149797571	-0.306373065398924	0.866666666666667	0.653846153846154	0.485808293803057	0.808130237528084	538	6.74924792398313e-92	chr11	379866	380019	Exon16	+	B4GALNT4	protein_coding	chr11	379866	380019	0.0126268878435256	1	CpG: 140	chr11	379295	380768	chr11	379866	380019	*	*	*	*	*	0	0	chr11-378725:380375	chr11	378725	380375	chr11	379866	380019	AGO1,RBFOX2,AGO2,ZBTB33,POLR2A,POLR2G,TAF15,AGO1	chr11	379005	380851	chr11	379866
chr11	370258	382375	0.202429149797571	-0.306373065398924	0.866666666666667	0.653846153846154	0.485808293803057	0.808130237528084	538	6.74924792398313e-92	chr11	380020	380129	Intron16	+	B4GALNT4	protein_coding	chr11	380020	380129	0.00899562598002806	1	CpG: 140	chr11	379295	380768	chr11	380020	380129	*	*	*	*	*	0	0	chr11-378725:380375	chr11	378725	380375	chr11	380020	380129	AGO1,RBFOX2,AGO2,ZBTB33,POLR2A,POLR2G,TAF15,AGO1	chr11	379005	380851	chr11	380020
chr11	370258	382375	0.202429149797571	-0.306373065398924	0.866666666666667	0.653846153846154	0.485808293803057	0.808130237528084	538	6.74924792398313e-92	chr11	380130	380202	Exon17	+	B4GALNT4	protein_coding	chr11	380130	380202	0.00594206486754147	1	CpG: 140	chr11	379295	380768	chr11	380130	380202	*	*	*	*	*	0	0	chr11-378725:380375	chr11	378725	380375	chr11	380130	380202	AGO1,RBFOX2,AGO2,ZBTB33,POLR2A,POLR2G,TAF15,AGO1	chr11	379005	380851	chr11	380130
chr11	370258	382375	0.202429149797571	-0.306373065398924	0.866666666666667	0.653846153846154	0.485808293803057	0.808130237528084	538	6.74924792398313e-92	chr11	380203	380291	Intron17	+	B4GALNT4	protein_coding	chr11	380203	380291	0.00726252372699513	1	CpG: 140	chr11	379295	380768	chr11	380203	380291	*	*	*	*	*	0	0	chr11-378725:380375	chr11	378725	380375	chr11	380203	380291	AGO1,RBFOX2,AGO2,ZBTB33,POLR2A,POLR2G,TAF15,AGO1	chr11	379005	380851	chr11	380203
chr11	370258	382375	0.202429149797571	-0.306373065398924	0.866666666666667	0.653846153846154	0.485808293803057	0.808130237528084	538	6.74924792398313e-92	chr11	380292	380445	Exon18	+	B4GALNT4	protein_coding	chr11	380292	380445	0.0126268878435256	1	CpG: 140	chr11	379295	380768	chr11	380292	380445	*	*	*	*	*	0	0	chr11-378725:380375	chr11	378725	380375	chr11	380292	380375	AGO1,RBFOX2,AGO2,ZBTB33,POLR2A,POLR2G,TAF15,AGO1	chr11	379005	380851	chr11	380292
chr11	370258	382375	0.202429149797571	-0.306373065398924	0.866666666666667	0.653846153846154	0.485808293803057	0.808130237528084	538	6.74924792398313e-92	chr11	380446	380824	Intron18	+	B4GALNT4	protein_coding	chr11	380446	380824	0.0311958405545927	1	CpG: 140	chr11	379295	380768	chr11	380446	380768	*	*	*	*	*	0	0	chr11-380425:380875	chr11	380425	380875	chr11	380446	380824	AGO1,RBFOX2,AGO2,ZBTB33,POLR2A,POLR2G,TAF15,AGO1	chr11	379005	380851	chr11	380446
chr11	370258	382375	0.202429149797571	-0.306373065398924	0.866666666666667	0.653846153846154	0.485808293803057	0.808130237528084	538	6.74924792398313e-92	chr11	380825	380951	Exon19	+	B4GALNT4	protein_coding	chr11	380825	380951	0.0103986135181976	1	*	*	*	*	*	0	0	*	*	*	*	*	0	0	chr11-380425:380875	chr11	380425	380875	chr11	380825	380875	AGO1,RBFOX2,AGO2,ZBTB33,POLR2A,POLR2G,TAF15,AGO1	chr11	379005	380851	chr11	380825
chr11	370258	382375	0.202429149797571	-0.306373065398924	0.866666666666667	0.653846153846154	0.485808293803057	0.808130237528084	538	6.74924792398313e-92	chr11	380952	381668	Intron19	+	B4GALNT4	protein_coding	chr11	380952	381668	0.0590905339605513	1	*	*	*	*	*	0	0	*	*	*	*	*	0	0	chr11-380885:381315	chr11	380885	381315	chr11	380952	381315	AGO1,AGO2,RBFOX2,CTCF,ZBTB7A	chr11	381430	382822	chr11	381430
chr11	370258	382375	0.202429149797571	-0.306373065398924	0.866666666666667	0.653846153846154	0.485808293803057	0.808130237528084	538	6.74924792398313e-92	chr11	381669	382116	LastExon	+	B4GALNT4	protein_coding	chr11	381669	382116	0.0368903193859866	1	*	*	*	*	*	0	0	*	*	*	*	*	0	0	chr11-381665:381995	chr11	381665	381995	chr11	381669	381995	AGO1,AGO2,RBFOX2,CTCF,ZBTB7A	chr11	381430	382822	chr11	381669
chr11	397862	400727	0.26547987616099	-0.343138042588651	0.842105263157895	0.583333333333333	0.516867220926751	0.885078779128824	183	3.4513349407718e-46	chr11	397663	398991	Intron4	+	PKP3	protein_coding	chr11	397862	398991	0.394066317626527	0.850150602409639	*	*	*	*	*	0	0	*	*	*	*	*	0	0	chr11-398865:400110	chr11	398865	400110	chr11	398865	398991	KDM5B,SMARCA4,SP1,TAF15,PKNOX1,MNT,RBFOX2,MYC,POLR2A,GABPA,POLR2G,ZNF687,SMARCE1,NRF1,MEIS2,ARID1B,FOS,DPF2,HDAC1,ZBTB7A,YY1,NEUROD1,EGR1,MXI1,JUND,BHLHE40,STAT3,MAX,MTA2,ATF3,FOXA1,JUN,FOSL1,FOSL2,EP300,PHF21A,CLOCK,SMARCA5,AGO2,GMEB1,ZBTB2,NFRKB,CTCF,ZFX,ESRRA,NBN,MNT,UBTF,DACH1,MYC,NRF1,HDAC2,GABPB1,SIN3A,PKNOX1,TFAP4,EZH2,FOS,MEIS2,RBM39,L3MBTL2,MAX,HNRNPK,IRF2,PHF8,ZEB2,ZNF592,FOXA1,E2F6,TAF…	chr11	393085	397876	chr11	397862
chr11	397862	400727	0.26547987616099	-0.343138042588651	0.842105263157895	0.583333333333333	0.516867220926751	0.885078779128824	183	3.4513349407718e-46	chr11	398992	399196	Exon5	+	PKP3	protein_coding	chr11	398992	399196	0.0712041884816754	1	*	*	*	*	*	0	0	*	*	*	*	*	0	0	chr11-398865:400110	chr11	398865	400110	chr11	398992	399196	POLR2A,ZEB2,CDC5L,POLR2G,CTCF	chr11	398647	399307	chr11	398992
chr11	397862	400727	0.26547987616099	-0.343138042588651	0.842105263157895	0.583333333333333	0.516867220926751	0.885078779128824	183	3.4513349407718e-46	chr11	399197	399966	Intron5	+	PKP3	protein_coding	chr11	399197	399966	0.268411867364747	1	*	*	*	*	*	0	0	*	*	*	*	*	0	0	chr11-398865:400110	chr11	398865	400110	chr11	399197	399966	POLR2A,ZEB2,CDC5L,POLR2G,CTCF	chr11	398647	399307	chr11	399197
chr11	397862	400727	0.26547987616099	-0.343138042588651	0.842105263157895	0.583333333333333	0.516867220926751	0.885078779128824	183	3.4513349407718e-46	chr11	399967	400141	Exon6	+	PKP3	protein_coding	chr11	399967	400141	0.0607329842931937	1	CpG: 65	chr11	400096	400757	chr11	400096	400141	*	*	*	*	*	0	0	chr11-398865:400110	chr11	398865	400110	chr11	399967	400110	POLR2G,AGO2,AGO1,FIP1L1,ZBTB33,GABPA	chr11	399647	400744	chr11	399967
chr11	397862	400727	0.26547987616099	-0.343138042588651	0.842105263157895	0.583333333333333	0.516867220926751	0.885078779128824	183	3.4513349407718e-46	chr11	400142	400333	Intron6	+	PKP3	protein_coding	chr11	400142	400333	0.0666666666666667	1	CpG: 65	chr11	400096	400757	chr11	400142	400333	*	*	*	*	*	0	0	chr11-400265:400775	chr11	400265	400775	chr11	400265	400333	POLR2G,AGO2,AGO1,FIP1L1,ZBTB33,GABPA	chr11	399647	400744	chr11	400142
chr11	397862	400727	0.26547987616099	-0.343138042588651	0.842105263157895	0.583333333333333	0.516867220926751	0.885078779128824	183	3.4513349407718e-46	chr11	400334	400451	Exon7	+	PKP3	protein_coding	chr11	400334	400451	0.0408376963350785	1	CpG: 65	chr11	400096	400757	chr11	400334	400451	*	*	*	*	*	0	0	chr11-400265:400775	chr11	400265	400775	chr11	400334	400451	POLR2G,AGO2,AGO1,FIP1L1,ZBTB33,GABPA	chr11	399647	400744	chr11	400334
chr11	397862	400727	0.26547987616099	-0.343138042588651	0.842105263157895	0.583333333333333	0.516867220926751	0.885078779128824	183	3.4513349407718e-46	chr11	400452	400534	Intron7	+	PKP3	protein_coding	chr11	400452	400534	0.0286212914485166	1	CpG: 65	chr11	400096	400757	chr11	400452	400534	*	*	*	*	*	0	0	chr11-400265:400775	chr11	400265	400775	chr11	400452	400534	POLR2G,AGO2,AGO1,FIP1L1,ZBTB33,GABPA	chr11	399647	400744	chr11	400452
chr11	397862	400727	0.26547987616099	-0.343138042588651	0.842105263157895	0.583333333333333	0.516867220926751	0.885078779128824	183	3.4513349407718e-46	chr11	400535	400705	Exon8	+	PKP3	protein_coding	chr11	400535	400705	0.0593368237347295	1	CpG: 65	chr11	400096	400757	chr11	400535	400705	*	*	*	*	*	0	0	chr11-400265:400775	chr11	400265	400775	chr11	400535	400705	POLR2G,AGO2,AGO1,FIP1L1,ZBTB33,GABPA	chr11	399647	400744	chr11	400535
chr11	397862	400727	0.26547987616099	-0.343138042588651	0.842105263157895	0.583333333333333	0.516867220926751	0.885078779128824	183	3.4513349407718e-46	chr11	400706	403077	Intron8	+	PKP3	protein_coding	chr11	400706	400727	0.00732984293193717	0.00885702235343737	CpG: 65	chr11	400096	400757	chr11	400706	400727	*	*	*	*	*	0	0	chr11-400265:400775	chr11	400265	400775	chr11	400706	400727	POLR2G,AGO2,AGO1,FIP1L1,ZBTB33,GABPA	chr11	399647	400744	chr11	400706
chr11	400743	403108	0.42296918767507	-0.439312153926741	0.9	0.457142857142857	0.440535652796116	0.8844400828796	297	5.21108972535596e-97	chr11	400706	403077	Intron8	+	PKP3	protein_coding	chr11	400743	403077	0.986892177589852	0.984394770139182	CpG: 65	chr11	400096	400757	chr11	400743	400757	*	*	*	*	*	0	0	chr11-400265:400775	chr11	400265	400775	chr11	400743	400775	POLR2G,AGO2,AGO1,FIP1L1,ZBTB33,GABPA	chr11	399647	400744	chr11	400743
chr11	400743	403108	0.42296918767507	-0.439312153926741	0.9	0.457142857142857	0.440535652796116	0.8844400828796	297	5.21108972535596e-97	chr11	403078	403263	Exon9	+	PKP3	protein_coding	chr11	403078	403108	0.0126849894291755	0.162162162162162	CpG: 31	chr11	403072	403400	chr11	403078	403108	*	*	*	*	*	0	0	*	*	*	*	*	0	0	HNRNPK,RBFOX2,KDM5B,AGO1,POLR2A,ZBTB7A,CTCF,GABPA,NFIC,RBFOX2,RAD21,POLR2G,TEAD4,RBBP5,TAF15,AGO1,RBM39,HNF4A,ZBTB33,CTCF,KDM5B,NRF1,SIN3A,ZFX,NR3C1,GATAD2B,FIP1L1,CREB3L1,DPF2,TRIM22,POLR2A,L3MBTL2,HNRNPK,PCBP1,RNF2,ZNF592,RBM22,U2AF1,SMARCA5,ZFP91,HNRNPL,SKIL,CBX1,ATF7,SAFB,RLF,IKZF1,KDM4B,ZNF207,CTBP1,HNRNPLL,SP1,NR2F6,ZNF639,PML,EGR1,TRIM24,SMARCA4,ZNF282,RAD21,PHF8,PTBP1,ZEB2,CBX3,MEIS2,E2F8…	chr11	402953	408774	chr11	403078
chr11	403136	406627	0.226794231205996	-0.282378823383636	0.846052631578948	0.567567567567568	0.579133308095821	0.88481072700977	139	3.46493595266656e-31	chr11	403078	403263	Exon9	+	PKP3	protein_coding	chr11	403136	403263	0.0363792609567459	0.686486486486486	CpG: 31	chr11	403072	403400	chr11	403136	403263	*	*	*	*	*	0	0	chr11-403240:403635	chr11	403240	403635	chr11	403240	403263	HNRNPK,RBFOX2,KDM5B,AGO1,POLR2A,ZBTB7A,CTCF,GABPA,NFIC,RBFOX2,RAD21,POLR2G,TEAD4,RBBP5,TAF15,AGO1,RBM39,HNF4A,ZBTB33,CTCF,KDM5B,NRF1,SIN3A,ZFX,NR3C1,GATAD2B,FIP1L1,CREB3L1,DPF2,TRIM22,POLR2A,L3MBTL2,HNRNPK,PCBP1,RNF2,ZNF592,RBM22,U2AF1,SMARCA5,ZFP91,HNRNPL,SKIL,CBX1,ATF7,SAFB,RLF,IKZF1,KDM4B,ZNF207,CTBP1,HNRNPLL,SP1,NR2F6,ZNF639,PML,EGR1,TRIM24,SMARCA4,ZNF282,RAD21,PHF8,PTBP1,ZEB2,CBX3,MEIS2,E2F8…	chr11	402953	408774	chr11	403136
chr11	403136	406627	0.226794231205996	-0.282378823383636	0.846052631578948	0.567567567567568	0.579133308095821	0.88481072700977	139	3.46493595266656e-31	chr11	403264	403617	Intron9	+	PKP3	protein_coding	chr11	403264	403617	0.101117158407333	1	CpG: 31	chr11	403072	403400	chr11	403264	403400	*	*	*	*	*	0	0	chr11-403240:403635	chr11	403240	403635	chr11	403264	403617	HNRNPK,RBFOX2,KDM5B,AGO1,POLR2A,ZBTB7A,CTCF,GABPA,NFIC,RBFOX2,RAD21,POLR2G,TEAD4,RBBP5,TAF15,AGO1,RBM39,HNF4A,ZBTB33,CTCF,KDM5B,NRF1,SIN3A,ZFX,NR3C1,GATAD2B,FIP1L1,CREB3L1,DPF2,TRIM22,POLR2A,L3MBTL2,HNRNPK,PCBP1,RNF2,ZNF592,RBM22,U2AF1,SMARCA5,ZFP91,HNRNPL,SKIL,CBX1,ATF7,SAFB,RLF,IKZF1,KDM4B,ZNF207,CTBP1,HNRNPLL,SP1,NR2F6,ZNF639,PML,EGR1,TRIM24,SMARCA4,ZNF282,RAD21,PHF8,PTBP1,ZEB2,CBX3,MEIS2,E2F8…	chr11	402953	408774	chr11	403264
chr11	403136	406627	0.226794231205996	-0.282378823383636	0.846052631578948	0.567567567567568	0.579133308095821	0.88481072700977	139	3.46493595266656e-31	chr11	403618	403771	Exon10	+	PKP3	protein_coding	chr11	403618	403771	0.0438269836723002	1	*	*	*	*	*	0	0	*	*	*	*	*	0	0	chr11-403240:403635	chr11	403240	403635	chr11	403618	403635	HNRNPK,RBFOX2,KDM5B,AGO1,POLR2A,ZBTB7A,CTCF,GABPA,NFIC,RBFOX2,RAD21,POLR2G,TEAD4,RBBP5,TAF15,AGO1,RBM39,HNF4A,ZBTB33,CTCF,KDM5B,NRF1,SIN3A,ZFX,NR3C1,GATAD2B,FIP1L1,CREB3L1,DPF2,TRIM22,POLR2A,L3MBTL2,HNRNPK,PCBP1,RNF2,ZNF592,RBM22,U2AF1,SMARCA5,ZFP91,HNRNPL,SKIL,CBX1,ATF7,SAFB,RLF,IKZF1,KDM4B,ZNF207,CTBP1,HNRNPLL,SP1,NR2F6,ZNF639,PML,EGR1,TRIM24,SMARCA4,ZNF282,RAD21,PHF8,PTBP1,ZEB2,CBX3,MEIS2,E2F8…	chr11	402953	408774	chr11	403618
chr11	403136	406627	0.226794231205996	-0.282378823383636	0.846052631578948	0.567567567567568	0.579133308095821	0.88481072700977	139	3.46493595266656e-31	chr11	403772	403942	Intron10	+	PKP3	protein_coding	chr11	403772	403942	0.048696648524778	1	*	*	*	*	*	0	0	*	*	*	*	*	0	0	*	*	*	*	*	0	0	HNRNPK,RBFOX2,KDM5B,AGO1,POLR2A,ZBTB7A,CTCF,GABPA,NFIC,RBFOX2,RAD21,POLR2G,TEAD4,RBBP5,TAF15,AGO1,RBM39,HNF4A,ZBTB33,CTCF,KDM5B,NRF1,SIN3A,ZFX,NR3C1,GATAD2B,FIP1L1,CREB3L1,DPF2,TRIM22,POLR2A,L3MBTL2,HNRNPK,PCBP1,RNF2,ZNF592,RBM22,U2AF1,SMARCA5,ZFP91,HNRNPL,SKIL,CBX1,ATF7,SAFB,RLF,IKZF1,KDM4B,ZNF207,CTBP1,HNRNPLL,SP1,NR2F6,ZNF639,PML,EGR1,TRIM24,SMARCA4,ZNF282,RAD21,PHF8,PTBP1,ZEB2,CBX3,MEIS2,E2F8…	chr11	402953	408774	chr11	403772
chr11	403136	406627	0.226794231205996	-0.282378823383636	0.846052631578948	0.567567567567568	0.579133308095821	0.88481072700977	139	3.46493595266656e-31	chr11	403943	404135	Exon11	+	PKP3	protein_coding	chr11	403943	404135	0.0549985677456316	1	*	*	*	*	*	0	0	*	*	*	*	*	0	0	chr11-403985:404135	chr11	403985	404135	chr11	403985	404135	HNRNPK,RBFOX2,KDM5B,AGO1,POLR2A,ZBTB7A,CTCF,GABPA,NFIC,RBFOX2,RAD21,POLR2G,TEAD4,RBBP5,TAF15,AGO1,RBM39,HNF4A,ZBTB33,CTCF,KDM5B,NRF1,SIN3A,ZFX,NR3C1,GATAD2B,FIP1L1,CREB3L1,DPF2,TRIM22,POLR2A,L3MBTL2,HNRNPK,PCBP1,RNF2,ZNF592,RBM22,U2AF1,SMARCA5,ZFP91,HNRNPL,SKIL,CBX1,ATF7,SAFB,RLF,IKZF1,KDM4B,ZNF207,CTBP1,HNRNPLL,SP1,NR2F6,ZNF639,PML,EGR1,TRIM24,SMARCA4,ZNF282,RAD21,PHF8,PTBP1,ZEB2,CBX3,MEIS2,E2F8…	chr11	402953	408774	chr11	403943
chr11	403136	406627	0.226794231205996	-0.282378823383636	0.846052631578948	0.567567567567568	0.579133308095821	0.88481072700977	139	3.46493595266656e-31	chr11	404136	404235	Intron11	+	PKP3	protein_coding	chr11	404136	404235	0.0283586364938413	1	*	*	*	*	*	0	0	*	*	*	*	*	0	0	chr11-404185:404335	chr11	404185	404335	chr11	404185	404235	HNRNPK,RBFOX2,KDM5B,AGO1,POLR2A,ZBTB7A,CTCF,GABPA,NFIC,RBFOX2,RAD21,POLR2G,TEAD4,RBBP5,TAF15,AGO1,RBM39,HNF4A,ZBTB33,CTCF,KDM5B,NRF1,SIN3A,ZFX,NR3C1,GATAD2B,FIP1L1,CREB3L1,DPF2,TRIM22,POLR2A,L3MBTL2,HNRNPK,PCBP1,RNF2,ZNF592,RBM22,U2AF1,SMARCA5,ZFP91,HNRNPL,SKIL,CBX1,ATF7,SAFB,RLF,IKZF1,KDM4B,ZNF207,CTBP1,HNRNPLL,SP1,NR2F6,ZNF639,PML,EGR1,TRIM24,SMARCA4,ZNF282,RAD21,PHF8,PTBP1,ZEB2,CBX3,MEIS2,E2F8…	chr11	402953	408774	chr11	404136
chr11	403136	406627	0.226794231205996	-0.282378823383636	0.846052631578948	0.567567567567568	0.579133308095821	0.88481072700977	139	3.46493595266656e-31	chr11	404236	404323	Exon12	+	PKP3	protein_coding	chr11	404236	404323	0.0249212260097393	1	*	*	*	*	*	0	0	*	*	*	*	*	0	0	chr11-404185:404335	chr11	404185	404335	chr11	404236	404323	HNRNPK,RBFOX2,KDM5B,AGO1,POLR2A,ZBTB7A,CTCF,GABPA,NFIC,RBFOX2,RAD21,POLR2G,TEAD4,RBBP5,TAF15,AGO1,RBM39,HNF4A,ZBTB33,CTCF,KDM5B,NRF1,SIN3A,ZFX,NR3C1,GATAD2B,FIP1L1,CREB3L1,DPF2,TRIM22,POLR2A,L3MBTL2,HNRNPK,PCBP1,RNF2,ZNF592,RBM22,U2AF1,SMARCA5,ZFP91,HNRNPL,SKIL,CBX1,ATF7,SAFB,RLF,IKZF1,KDM4B,ZNF207,CTBP1,HNRNPLL,SP1,NR2F6,ZNF639,PML,EGR1,TRIM24,SMARCA4,ZNF282,RAD21,PHF8,PTBP1,ZEB2,CBX3,MEIS2,E2F8…	chr11	402953	408774	chr11	404236
chr11	403136	406627	0.226794231205996	-0.282378823383636	0.846052631578948	0.567567567567568	0.579133308095821	0.88481072700977	139	3.46493595266656e-31	chr11	404324	404533	Intron12	+	PKP3	protein_coding	chr11	404324	404533	0.0598682325981094	1	*	*	*	*	*	0	0	*	*	*	*	*	0	0	chr11-404185:404335	chr11	404185	404335	chr11	404324	404335	HNRNPK,RBFOX2,KDM5B,AGO1,POLR2A,ZBTB7A,CTCF,GABPA,NFIC,RBFOX2,RAD21,POLR2G,TEAD4,RBBP5,TAF15,AGO1,RBM39,HNF4A,ZBTB33,CTCF,KDM5B,NRF1,SIN3A,ZFX,NR3C1,GATAD2B,FIP1L1,CREB3L1,DPF2,TRIM22,POLR2A,L3MBTL2,HNRNPK,PCBP1,RNF2,ZNF592,RBM22,U2AF1,SMARCA5,ZFP91,HNRNPL,SKIL,CBX1,ATF7,SAFB,RLF,IKZF1,KDM4B,ZNF207,CTBP1,HNRNPLL,SP1,NR2F6,ZNF639,PML,EGR1,TRIM24,SMARCA4,ZNF282,RAD21,PHF8,PTBP1,ZEB2,CBX3,MEIS2,E2F8…	chr11	402953	408774	chr11	404324
chr11	403136	406627	0.226794231205996	-0.282378823383636	0.846052631578948	0.567567567567568	0.579133308095821	0.88481072700977	139	3.46493595266656e-31	chr11	404534	404908	LastExon	+	PKP3	protein_coding	chr11	404534	404908	0.107132626754512	1	*	*	*	*	*	0	0	*	*	*	*	*	0	0	*	*	*	*	*	0	0	HNRNPK,RBFOX2,KDM5B,AGO1,POLR2A,ZBTB7A,CTCF,GABPA,NFIC,RBFOX2,RAD21,POLR2G,TEAD4,RBBP5,TAF15,AGO1,RBM39,HNF4A,ZBTB33,CTCF,KDM5B,NRF1,SIN3A,ZFX,NR3C1,GATAD2B,FIP1L1,CREB3L1,DPF2,TRIM22,POLR2A,L3MBTL2,HNRNPK,PCBP1,RNF2,ZNF592,RBM22,U2AF1,SMARCA5,ZFP91,HNRNPL,SKIL,CBX1,ATF7,SAFB,RLF,IKZF1,KDM4B,ZNF207,CTBP1,HNRNPLL,SP1,NR2F6,ZNF639,PML,EGR1,TRIM24,SMARCA4,ZNF282,RAD21,PHF8,PTBP1,ZEB2,CBX3,MEIS2,E2F8…	chr11	402953	408774	chr11	404534
chr11	403136	406627	0.226794231205996	-0.282378823383636	0.846052631578948	0.567567567567568	0.579133308095821	0.88481072700977	139	3.46493595266656e-31	chr11	405716	406059	LastExon	-	SIGIRR	protein_coding	chr11	405716	406059	0.0982526496705815	1	*	*	*	*	*	0	0	*	*	*	*	*	0	0	chr11-405480:406095	chr11	405480	406095	chr11	405716	406059	HNRNPK,RBFOX2,KDM5B,AGO1,POLR2A,ZBTB7A,CTCF,GABPA,NFIC,RBFOX2,RAD21,POLR2G,TEAD4,RBBP5,TAF15,AGO1,RBM39,HNF4A,ZBTB33,CTCF,KDM5B,NRF1,SIN3A,ZFX,NR3C1,GATAD2B,FIP1L1,CREB3L1,DPF2,TRIM22,POLR2A,L3MBTL2,HNRNPK,PCBP1,RNF2,ZNF592,RBM22,U2AF1,SMARCA5,ZFP91,HNRNPL,SKIL,CBX1,ATF7,SAFB,RLF,IKZF1,KDM4B,ZNF207,CTBP1,HNRNPLL,SP1,NR2F6,ZNF639,PML,EGR1,TRIM24,SMARCA4,ZNF282,RAD21,PHF8,PTBP1,ZEB2,CBX3,MEIS2,E2F8…	chr11	402953	408774	chr11	405716
chr11	403136	406627	0.226794231205996	-0.282378823383636	0.846052631578948	0.567567567567568	0.579133308095821	0.88481072700977	139	3.46493595266656e-31	chr11	406060	406348	Intron9	-	SIGIRR	protein_coding	chr11	406060	406348	0.0824978516184474	1	*	*	*	*	*	0	0	*	*	*	*	*	0	0	chr11-405480:406095	chr11	405480	406095	chr11	406060	406095	HNRNPK,RBFOX2,KDM5B,AGO1,POLR2A,ZBTB7A,CTCF,GABPA,NFIC,RBFOX2,RAD21,POLR2G,TEAD4,RBBP5,TAF15,AGO1,RBM39,HNF4A,ZBTB33,CTCF,KDM5B,NRF1,SIN3A,ZFX,NR3C1,GATAD2B,FIP1L1,CREB3L1,DPF2,TRIM22,POLR2A,L3MBTL2,HNRNPK,PCBP1,RNF2,ZNF592,RBM22,U2AF1,SMARCA5,ZFP91,HNRNPL,SKIL,CBX1,ATF7,SAFB,RLF,IKZF1,KDM4B,ZNF207,CTBP1,HNRNPLL,SP1,NR2F6,ZNF639,PML,EGR1,TRIM24,SMARCA4,ZNF282,RAD21,PHF8,PTBP1,ZEB2,CBX3,MEIS2,E2F8…	chr11	402953	408774	chr11	406060
chr11	403136	406627	0.226794231205996	-0.282378823383636	0.846052631578948	0.567567567567568	0.579133308095821	0.88481072700977	139	3.46493595266656e-31	chr11	406349	406538	Exon9	-	SIGIRR	protein_coding	chr11	406349	406538	0.0541392151246061	1	CpG: 111	chr11	406491	407871	chr11	406491	406538	*	*	*	*	*	0	0	chr11-406105:406475	chr11	406105	406475	chr11	406349	406475	HNRNPK,RBFOX2,KDM5B,AGO1,POLR2A,ZBTB7A,CTCF,GABPA,NFIC,RBFOX2,RAD21,POLR2G,TEAD4,RBBP5,TAF15,AGO1,RBM39,HNF4A,ZBTB33,CTCF,KDM5B,NRF1,SIN3A,ZFX,NR3C1,GATAD2B,FIP1L1,CREB3L1,DPF2,TRIM22,POLR2A,L3MBTL2,HNRNPK,PCBP1,RNF2,ZNF592,RBM22,U2AF1,SMARCA5,ZFP91,HNRNPL,SKIL,CBX1,ATF7,SAFB,RLF,IKZF1,KDM4B,ZNF207,CTBP1,HNRNPLL,SP1,NR2F6,ZNF639,PML,EGR1,TRIM24,SMARCA4,ZNF282,RAD21,PHF8,PTBP1,ZEB2,CBX3,MEIS2,E2F8…	chr11	402953	408774	chr11	406349
chr11	403136	406627	0.226794231205996	-0.282378823383636	0.846052631578948	0.567567567567568	0.579133308095821	0.88481072700977	139	3.46493595266656e-31	chr11	406539	406842	Intron8	-	SIGIRR	protein_coding	chr11	406539	406627	0.0252076768834145	0.29042904290429	CpG: 111	chr11	406491	407871	chr11	406539	406627	*	*	*	*	*	0	0	chr11-406600:406755	chr11	406600	406755	chr11	406600	406627	HNRNPK,RBFOX2,KDM5B,AGO1,POLR2A,ZBTB7A,CTCF,GABPA,NFIC,RBFOX2,RAD21,POLR2G,TEAD4,RBBP5,TAF15,AGO1,RBM39,HNF4A,ZBTB33,CTCF,KDM5B,NRF1,SIN3A,ZFX,NR3C1,GATAD2B,FIP1L1,CREB3L1,DPF2,TRIM22,POLR2A,L3MBTL2,HNRNPK,PCBP1,RNF2,ZNF592,RBM22,U2AF1,SMARCA5,ZFP91,HNRNPL,SKIL,CBX1,ATF7,SAFB,RLF,IKZF1,KDM4B,ZNF207,CTBP1,HNRNPLL,SP1,NR2F6,ZNF639,PML,EGR1,TRIM24,SMARCA4,ZNF282,RAD21,PHF8,PTBP1,ZEB2,CBX3,MEIS2,E2F8…	chr11	402953	408774	chr11	406539
chr11	1264315	1274705	0.208333333333333	-0.119352758673182	0.666666666666667	0.451612903225806	0.710308693576779	0.851678844192422	372	9.34003804389966e-33	chr11	1262081	1272973	Exon31	+	MUC5B	protein_coding	chr11	1264315	1272973	0.83330125120308	0.794895336026441	*	*	*	*	*	0	0	*	*	*	*	*	0	0	chr11-1267045:1267215	chr11	1267045	1267215	chr11	1267045	1267215	MNT,POLR2A	chr11	1272215	1272778	chr11	1272215
chr11	1264315	1274705	0.208333333333333	-0.119352758673182	0.666666666666667	0.451612903225806	0.710308693576779	0.851678844192422	372	9.34003804389966e-33	chr11	1272974	1273572	Intron31	+	MUC5B	protein_coding	chr11	1272974	1273572	0.0575553416746872	1	*	*	*	*	*	0	0	*	*	*	*	*	0	0	chr11-1272865:1273115	chr11	1272865	1273115	chr11	1272974	1273115	POLR2A,NR3C1	chr11	1273522	1274117	chr11	1273522
chr11	1264315	1274705	0.208333333333333	-0.119352758673182	0.666666666666667	0.451612903225806	0.710308693576779	0.851678844192422	372	9.34003804389966e-33	chr11	1273573	1273754	Exon32	+	MUC5B	protein_coding	chr11	1273573	1273754	0.0174205967276227	1	CpG: 19	chr11	1273594	1273861	chr11	1273594	1273754	*	*	*	*	*	0	0	chr11-1273325:1273595	chr11	1273325	1273595	chr11	1273573	1273595	POLR2A,NR3C1	chr11	1273522	1274117	chr11	1273573
chr11	1264315	1274705	0.208333333333333	-0.119352758673182	0.666666666666667	0.451612903225806	0.710308693576779	0.851678844192422	372	9.34003804389966e-33	chr11	1273755	1274038	Intron32	+	MUC5B	protein_coding	chr11	1273755	1274038	0.0272377285851781	1	CpG: 19	chr11	1273594	1273861	chr11	1273755	1273861	*	*	*	*	*	0	0	chr11-1273625:1273835	chr11	1273625	1273835	chr11	1273755	1273835	POLR2A,NR3C1	chr11	1273522	1274117	chr11	1273755
chr11	1264315	1274705	0.208333333333333	-0.119352758673182	0.666666666666667	0.451612903225806	0.710308693576779	0.851678844192422	372	9.34003804389966e-33	chr11	1274039	1274210	Exon33	+	MUC5B	protein_coding	chr11	1274039	1274210	0.0164581328200193	1	CpG: 16	chr11	1274069	1274270	chr11	1274069	1274210	*	*	*	*	*	0	0	*	*	*	*	*	0	0	POLR2A,NR3C1	chr11	1273522	1274117	chr11	1274039
chr11	1264315	1274705	0.208333333333333	-0.119352758673182	0.666666666666667	0.451612903225806	0.710308693576779	0.851678844192422	372	9.34003804389966e-33	chr11	1274211	1275321	Intron33	+	MUC5B	protein_coding	chr11	1274211	1274705	0.0475457170356112	0.445045045045045	CpG: 16	chr11	1274069	1274270	chr11	1274211	1274270	*	*	*	*	*	0	0	chr11-1274325:1274475	chr11	1274325	1274475	chr11	1274325	1274475	MAFK,MAFF,ZNF316	chr11	1274361	1274741	chr11	1274361
chr11	1264315	1274705	0.208333333333333	-0.119352758673182	0.666666666666667	0.451612903225806	0.710308693576779	0.851678844192422	372	9.34003804389966e-33	chr11	1263869	1270850	Intron1	-	RP11-532E4.2	antisense	chr11	1264315	1270850	0.628970163618864	0.936112304827389	*	*	*	*	*	0	0	*	*	*	*	*	0	0	chr11-1267045:1267215	chr11	1267045	1267215	chr11	1267045	1267215	*	*	*	*	*	0
chr11	1264315	1274705	0.208333333333333	-0.119352758673182	0.666666666666667	0.451612903225806	0.710308693576779	0.851678844192422	372	9.34003804389966e-33	chr11	1270851	1270906	FirstExon	-	RP11-532E4.2	antisense	chr11	1270851	1270906	0.00529355149181906	1	*	*	*	*	*	0	0	*	*	*	*	*	0	0	*	*	*	*	*	0	0	*	*	*	*	*	0
chr11	1264315	1274705	0.208333333333333	-0.119352758673182	0.666666666666667	0.451612903225806	0.710308693576779	0.851678844192422	372	9.34003804389966e-33	chr11	1270907	1271907	Promoter	-	RP11-532E4.2	antisense	chr11	1270907	1271907	0.0962463907603465	1	*	*	*	*	*	0	0	*	*	*	*	*	0	0	*	*	*	*	*	0	0	*	*	*	*	*	0
chr11	1371972	1379299	0.220089285714285	-0.16296801759903	0.711309523809524	0.474937343358396	0.681397562812843	0.848156814051982	175	1.8679280826798e-15	*	*	*	InterGenic	*	*	*	*	*	*	*	*	*	*	*	*	*	0	0	*	*	*	*	*	0	0	chr11-1371685:1372055	chr11	1371685	1372055	chr11	1371972	1372055	ZNF384	chr11	1371976	1372352	chr11	1371976
chr11	1789228	1796310	0.205882352941177	-0.224612170026134	0.8	0.56	0.640393230649166	0.85072656568885	134	3.79164100446041e-17	*	*	*	InterGenic	*	*	*	*	*	*	*	*	*	*	*	*	*	0	0	chr11:1791889-1792111	chr11	1791889	1792111	chr11	1791889	1792111	chr11-1789360:1789775	chr11	1789360	1789775	chr11	1789360	1789775	MEF2B,EBF1	chr11	1789177	1789753	chr11	1789228
chr11	1892655	1894043	0.22741935483871	-0.223059964550447	0.733333333333333	0.46875	0.6848617231126	0.898260486861425	46	3.77653210166901e-08	chr11	1874428	1901316	Intron1	+	LSP1	protein_coding	chr11	1892655	1894043	1	0.0516215412079738	*	*	*	*	*	0	0	*	*	*	*	*	0	0	chr11-1891705:1892935	chr11	1891705	1892935	chr11	1892655	1892935	EZH2,TCF7L2,CTCF,CREB1,POLR2A,GABPA,RAD21,POLR2A,EZH2,E2F6,ZKSCAN1,MAX,SAFB	chr11	1890620	1892826	chr11	1892655
chr11	2018658	2021957	0.205949656750572	0.013617360990919	0.588235294117647	0.363636363636364	0.715045456717684	0.702585538840204	140	1.31706285208034e-17	*	*	*	InterGenic	*	*	*	*	*	*	*	*	CpG: 27	chr11	2019565	2019863	chr11	2019565	2019863	*	*	*	*	*	0	0	chr11-2018585:2018950	chr11	2018585	2018950	chr11	2018658	2018950	EZH2,REST,EGR1,MAX,POLR2A,HNRNPK,REST,E2F6,HNRNPL,REST,SP1,POLR2A,E2F6,EGR1,REST,TAF1,CEBPB,HNRNPL,MEF2B,EBF1,AGO1,BHLHE40,NFIC,CTCF,KDM5B,RBBP5,EZH2,MNT,MYC,GMEB1,NR3C1,ZBTB33,E2F6,RAD21,BACH1,MAX,SMC3,REST,SAFB,POLR2G,SUZ12,RXRA,ESRRA,RAD21,ZNF143,REST,SMC3,CBFA2T2,TAL1,CBFA2T3,NANOG,CTCF,NR2F2,RAD21,SMC3,POLR2A,TRIM22,REST,KDM4A,NR2F1,SETDB1,BHLHE40,RAD21,SMC3,CC2D1A,ZBTB33,TRIM22,ZNF143,ARID2…	chr11	2016529	2022842	chr11	2018658
chr11	2058807	2063596	0.206349206349207	-0.11133671264859	0.65	0.463414634146341	0.733229264910443	0.895116326978091	94	1.76832729264047e-07	*	*	*	InterGenic	*	*	*	*	*	*	*	*	*	*	*	*	*	0	0	*	*	*	*	*	0	0	chr11-2058625:2058815	chr11	2058625	2058815	chr11	2058807	2058815	CTCF,SPI1	chr11	2058911	2059390	chr11	2058911
chr11	2063797	2086450	0.441269841269841	0.42305852711239	0.5	0.0625	0.781906427976842	0.372758386923659	148	3.0939754731851e-45	*	*	*	InterGenic	*	*	*	*	*	*	*	*	*	*	*	*	*	0	0	chr11:2082720-2083054	chr11	2082720	2083054	chr11	2082720	2083054	chr11-2066405:2066555	chr11	2066405	2066555	chr11	2066405	2066555	GABPA,YY1,MAX,RXRA,HNF4A,FOXA2,SP1,RAD21,IKZF1,EHMT2,HDAC2,SOX6,FOXK2,LCORL	chr11	2062300	2064076	chr11	2063797
chr11	2086609	2104776	0.216666666666667	-0.181988414695097	0.782608695652174	0.538461538461538	0.659078481802769	0.846229523483699	236	9.88701821942979e-26	*	*	*	InterGenic	*	*	*	*	*	*	*	*	*	*	*	*	*	0	0	*	*	*	*	*	0	0	chr11-2087785:2087935	chr11	2087785	2087935	chr11	2087785	2087935	MNT,FOXA1	chr11	2091178	2091618	chr11	2091178
chr11	3373596	3380311	0.208333333333333	-0.400285624222416	0.894736842105263	0.673469387755102	0.41296708553421	0.861089415987367	106	2.25243569585845e-19	chr11	3361053	3392204	Intron3	-	ZNF195	protein_coding	chr11	3373596	3380311	1	0.215562903277583	*	*	*	*	*	0	0	*	*	*	*	*	0	0	chr11-3374360:3374550	chr11	3374360	3374550	chr11	3374360	3374550	SPI1,IKZF1	chr11	3374151	3374807	chr11	3374151
chr11	14286874	14307006	0.202130325814536	-0.348481861788099	0.875	0.648529411764706	0.491278868654165	0.825373597692073	149	4.52420122381551e-26	chr11	14284594	14295199	Intron1	-	RP11-21L19.1	antisense	chr11	14286874	14295199	0.413520762964435	0.785007072135785	*	*	*	*	*	0	0	*	*	*	*	*	0	0	chr11-14287545:14287715	chr11	14287545	14287715	chr11	14287545	14287715	POLR2A	chr11	14285515	14287356	chr11	14286874
chr11	14286874	14307006	0.202130325814536	-0.348481861788099	0.875	0.648529411764706	0.491278868654165	0.825373597692073	149	4.52420122381551e-26	chr11	14295200	14295237	FirstExon	-	RP11-21L19.1	antisense	chr11	14295200	14295237	0.00183787005761971	1	*	*	*	*	*	0	0	*	*	*	*	*	0	0	*	*	*	*	*	0	0	*	*	*	*	*	0
chr11	14286874	14307006	0.202130325814536	-0.348481861788099	0.875	0.648529411764706	0.491278868654165	0.825373597692073	149	4.52420122381551e-26	chr11	14295238	14296238	Promoter	-	RP11-21L19.1	antisense	chr11	14295238	14296238	0.0496721637194516	1	*	*	*	*	*	0	0	*	*	*	*	*	0	0	chr11-14295485:14295750	chr11	14295485	14295750	chr11	14295485	14295750	*	*	*	*	*	0
chr11	14286874	14307006	0.202130325814536	-0.348481861788099	0.875	0.648529411764706	0.491278868654165	0.825373597692073	149	4.52420122381551e-26	chr11	14300228	14300970	LastExon	-	RRAS2	protein_coding	chr11	14300228	14300970	0.0368567454798331	1	*	*	*	*	*	0	0	*	*	*	*	*	0	0	chr11-14300445:14300755	chr11	14300445	14300755	chr11	14300445	14300755	*	*	*	*	*	0
chr11	14286874	14307006	0.202130325814536	-0.348481861788099	0.875	0.648529411764706	0.491278868654165	0.825373597692073	149	4.52420122381551e-26	chr11	14300971	14303147	Intron5	-	RRAS2	protein_coding	chr11	14300971	14303147	0.108086628253527	1	*	*	*	*	*	0	0	*	*	*	*	*	0	0	chr11-14300885:14301035	chr11	14300885	14301035	chr11	14300971	14301035	*	*	*	*	*	0
chr11	14286874	14307006	0.202130325814536	-0.348481861788099	0.875	0.648529411764706	0.491278868654165	0.825373597692073	149	4.52420122381551e-26	chr11	14303148	14303266	Exon5	-	RRAS2	protein_coding	chr11	14303148	14303266	0.00586131531889529	1	*	*	*	*	*	0	0	*	*	*	*	*	0	0	*	*	*	*	*	0	0	*	*	*	*	*	0
chr11	14286874	14307006	0.202130325814536	-0.348481861788099	0.875	0.648529411764706	0.491278868654165	0.825373597692073	149	4.52420122381551e-26	chr11	14303267	14316016	Intron4	-	RRAS2	protein_coding	chr11	14303267	14307006	0.18572422014703	0.293277904149345	*	*	*	*	*	0	0	chr11:14306265-14306627	chr11	14306265	14306627	chr11	14306265	14306627	*	*	*	*	*	0	0	*	*	*	*	*	0
chr11	23908895	23913617	0.208775758365361	-0.283890031101369	0.822916666666667	0.615900383141763	0.584358277528082	0.873830808497474	67	7.13755256977027e-10	*	*	*	InterGenic	*	*	*	*	*	*	*	*	*	*	*	*	*	0	0	*	*	*	*	*	0	0	chr11-23909080:23909230	chr11	23909080	23909230	chr11	23909080	23909230	*	*	*	*	*	0
chr11	43569028	43569767	0.276018099547511	0.196181588092033	0.444444444444444	0.162162162162162	0.628491765742445	0.425141512179375	78	1.52884345842245e-22	*	*	*	InterGenic	*	*	*	*	*	*	*	*	CpG: 80	chr11	43568921	43569854	chr11	43569028	43569767	chr11:43569506-43569887	chr11	43569506	43569887	chr11	43569506	43569767	chr11-43568945:43569750	chr11	43568945	43569750	chr11	43569028	43569750	MNT,MYC,SP1,FOXA1,BHLHE40,FOXA2,HNRNPLL,ASH2L,EZH2,RFX1,KDM4A,BACH1,EGR1,EP300,E2F6,ZBTB7A,KDM4A,NEUROD1,RNF2,MNT,GMEB1,CREM,MYC,EP300,E2F6,L3MBTL2,CBX3,SAFB,SETDB1,MGA,CBX1,BHLHE40,MITF,MAX,USF2,POLR2A,CBFA2T2,USF1,HES1,E2F7,ZBTB33,RAD51,ZNF316	chr11	43568438	43570267	chr11	43569028
chr11	55015623	55024776	0.214751552795031	-0.132656062067059	0.735087719298245	0.518518518518518	0.68943890357433	0.852271120814526	73	8.88977515496369e-07	*	*	*	InterGenic	*	*	*	*	*	*	*	*	*	*	*	*	*	0	0	*	*	*	*	*	0	0	*	*	*	*	*	0	0	*	*	*	*	*	0
chr11	61159735	61160668	0.228197674418605	-0.0050988574239289	0.473684210526316	0.235294117647059	0.539063190864238	0.565412097590416	62	4.37913091998874e-18	chr11	61159159	61160137	FirstExon	+	TMEM216	protein_coding	chr11	61159735	61160137	0.430868167202572	0.411042944785276	CpG: 44	chr11	61159836	61160285	chr11	61159836	61160137	*	*	*	*	*	0	0	chr11-61159700:61160415	chr11	61159700	61160415	chr11	61159735	61160137	MLLT1,ZBTB33,ASH2L,SMARCE1,BRD4,POLR2G,MTA2,GATA1,ZNF687,ARID1B,IKZF1,IKZF2,SMARCA4,ZNF512B,ELF4,GABPB1,DPF2,MEF2B,NBN,E4F1,RFX1,TRIM24,RELB,ZNF592,TAF1,GMEB1,CTCF,NCOR1,NFATC3,POLR2A,SMARCA5,TBP,CEBPB,PHF8,EP300,NR2F1,EGR1,ZFX,EED,ZNF316,GATA3,ELF1,TCF12,ZBTB40,RBFOX2,MGA,SPI1,SKI,KLF16,ZNF217,SETDB1,ESRRA,SRF,AGO1,ELK1,CBFA2T3,RLF,CBFB,L3MBTL2,MNT,TCF7L2,GABPA,CBFA2T2,CREM,ATF2,HDAC2,HCFC1,SOX6…	chr11	61159251	61161612	chr11	61159735
chr11	61159735	61160668	0.228197674418605	-0.0050988574239289	0.473684210526316	0.235294117647059	0.539063190864238	0.565412097590416	62	4.37913091998874e-18	chr11	61160138	61160702	Intron1	+	TMEM216	protein_coding	chr11	61160138	61160668	0.568060021436227	0.939716312056738	CpG: 44	chr11	61159836	61160285	chr11	61160138	61160285	*	*	*	*	*	0	0	chr11-61159700:61160415	chr11	61159700	61160415	chr11	61160138	61160415	MLLT1,ZBTB33,ASH2L,SMARCE1,BRD4,POLR2G,MTA2,GATA1,ZNF687,ARID1B,IKZF1,IKZF2,SMARCA4,ZNF512B,ELF4,GABPB1,DPF2,MEF2B,NBN,E4F1,RFX1,TRIM24,RELB,ZNF592,TAF1,GMEB1,CTCF,NCOR1,NFATC3,POLR2A,SMARCA5,TBP,CEBPB,PHF8,EP300,NR2F1,EGR1,ZFX,EED,ZNF316,GATA3,ELF1,TCF12,ZBTB40,RBFOX2,MGA,SPI1,SKI,KLF16,ZNF217,SETDB1,ESRRA,SRF,AGO1,ELK1,CBFA2T3,RLF,CBFB,L3MBTL2,MNT,TCF7L2,GABPA,CBFA2T2,CREM,ATF2,HDAC2,HCFC1,SOX6…	chr11	61159251	61161612	chr11	61160138
chr11	64407744	64410237	0.263636363636364	-0.166327404400902	0.777777777777778	0.5	0.67831363798541	0.817673397482682	54	4.86144776723434e-09	chr11	64402925	64415690	Intron15	-	NRXN2	protein_coding	chr11	64407744	64410237	1	0.195299647473561	CpG: 117	chr11	64409877	64411253	chr11	64409877	64410237	*	*	*	*	*	0	0	chr11-64407925:64408075	chr11	64407925	64408075	chr11	64407925	64408075	EZH2,SPI1	chr11	64407636	64408948	chr11	64407744
chr11	65598601	65601087	0.205128205128205	-0.499197091957574	0.933333333333333	0.717948717948718	0.301862420566087	0.813229888491188	36	1.02224494632273e-09	chr11	65600111	65601111	Promoter	+	SNX32	protein_coding	chr11	65600111	65601087	0.392598551890587	0.976	CpG: 53	chr11	65601069	65601551	chr11	65601069	65601087	*	*	*	*	*	0	0	chr11-65600265:65600415	chr11	65600265	65600415	chr11	65600265	65600415	L3MBTL2,ZNF24,IKZF1,ZNF24,PHF20,BCOR,CTCF,MIER1	chr11	65598504	65600120	chr11	65600111
chr11	75137930	75140185	0.247619047619047	-0.123384575223995	0.714285714285714	0.466666666666667	0.597222494792368	0.679784624055734	54	1.08449258833774e-12	chr11	75137684	75139486	Intron2	-	KLHL35	protein_coding	chr11	75137930	75139486	0.690022172949002	0.863485016648169	CpG: 32	chr11	75139454	75139817	chr11	75139454	75139486	*	*	*	*	*	0	0	chr11-75139305:75139995	chr11	75139305	75139995	chr11	75139305	75139486	ZKSCAN1,SP1,JUND,NFYB,CREM,EP300,POLR2A,CREB1,PKNOX1,TAF1,MXI1,SIN3A,ZNF687,HNRNPLL,POLR2G	chr11	75139003	75140018	chr11	75139003
chr11	75137930	75140185	0.247619047619047	-0.123384575223995	0.714285714285714	0.466666666666667	0.597222494792368	0.679784624055734	54	1.08449258833774e-12	chr11	75139487	75139671	Exon2	-	KLHL35	protein_coding	chr11	75139487	75139671	0.0815964523281597	1	CpG: 32	chr11	75139454	75139817	chr11	75139487	75139671	*	*	*	*	*	0	0	chr11-75139305:75139995	chr11	75139305	75139995	chr11	75139487	75139671	ZKSCAN1,SP1,JUND,NFYB,CREM,EP300,POLR2A,CREB1,PKNOX1,TAF1,MXI1,SIN3A,ZNF687,HNRNPLL,POLR2G	chr11	75139003	75140018	chr11	75139487
chr11	75137930	75140185	0.247619047619047	-0.123384575223995	0.714285714285714	0.466666666666667	0.597222494792368	0.679784624055734	54	1.08449258833774e-12	chr11	75139672	75140793	Intron1	-	KLHL35	protein_coding	chr11	75139672	75140185	0.227494456762749	0.457627118644068	CpG: 32	chr11	75139454	75139817	chr11	75139672	75139817	*	*	*	*	*	0	0	chr11-75140045:75140535	chr11	75140045	75140535	chr11	75140045	75140185	ZKSCAN1,SP1,JUND,NFYB,CREM,EP300,POLR2A,CREB1,PKNOX1,TAF1,MXI1,SIN3A,ZNF687,HNRNPLL,POLR2G	chr11	75139003	75140018	chr11	75139672
chr11	75141156	75141847	0.267241379310345	-0.125139964900636	0.75	0.466666666666667	0.519646177450092	0.649475617871559	106	3.30750076857934e-32	chr11	75140794	75141236	FirstExon	-	KLHL35	protein_coding	chr11	75141156	75141236	0.115774240231548	0.180995475113122	CpG: 150	chr11	75140737	75141849	chr11	75141156	75141236	*	*	*	*	*	0	0	chr11-75140825:75142735	chr11	75140825	75142735	chr11	75141156	75141236	ELF1,TCF12,ZFX,CTCF,HDAC2,ZBTB33,RNF2,MAX,MYC,BHLHE40,USF1,KDM4A,IKZF1,NR3C1,TCF7L2,POLR2A,YY1,MYC,SUZ12,GABPA,NRF1,REST,EZH2,SIN3A,BHLHE40,MXI1,ELF1,HDAC6,EBF1,ZNF24,MNT,MTA1,TBP,NR3C1,MYC,ZNF687	chr11	75140369	75142644	chr11	75141156
chr11	75141156	75141847	0.267241379310345	-0.125139964900636	0.75	0.466666666666667	0.519646177450092	0.649475617871559	106	3.30750076857934e-32	chr11	75141237	75142237	Promoter	-	KLHL35	protein_coding	chr11	75141237	75141847	0.882778581765557	0.61	CpG: 150	chr11	75140737	75141849	chr11	75141237	75141847	*	*	*	*	*	0	0	chr11-75140825:75142735	chr11	75140825	75142735	chr11	75141237	75141847	ELF1,TCF12,ZFX,CTCF,HDAC2,ZBTB33,RNF2,MAX,MYC,BHLHE40,USF1,KDM4A,IKZF1,NR3C1,TCF7L2,POLR2A,YY1,MYC,SUZ12,GABPA,NRF1,REST,EZH2,SIN3A,BHLHE40,MXI1,ELF1,HDAC6,EBF1,ZNF24,MNT,MTA1,TBP,NR3C1,MYC,ZNF687	chr11	75140369	75142644	chr11	75141237
chr11	82139166	82139936	0.274882024882025	-0.305719087012122	0.842105263157895	0.470588235294118	0.597503754999161	0.91160343505393	13	0.00350672931441711	*	*	*	InterGenic	*	*	*	*	*	*	*	*	*	*	*	*	*	0	0	*	*	*	*	*	0	0	*	*	*	*	*	0	0	*	*	*	*	*	0
chr11	105286905	105296532	0.21826923076923	-0.182400798116884	0.75	0.381944444444445	0.646240625180289	0.848671981762366	75	1.83108360897471e-08	chr11	105139039	105402328	Intron1	-	RP11-94P11.4	lincRNA	chr11	105286905	105296532	1	0.0365643836240785	*	*	*	*	*	0	0	*	*	*	*	*	0	0	chr11-105292625:105292775	chr11	105292625	105292775	chr11	105292625	105292775	CEBPB,CREB1	chr11	105291449	105291855	chr11	105291449
chr11	113258356	113259074	0.257780507780508	0.0528545980143075	0.6	0.343303571428571	0.656605260808937	0.604296178932239	49	1.0570636821165e-15	chr11	113257512	113258512	Promoter	+	ANKK1	protein_coding	chr11	113258356	113258512	0.217270194986072	0.156	CpG: 39	chr11	113258443	113258821	chr11	113258443	113258512	*	*	*	*	*	0	0	chr11-113257660:113259235	chr11	113257660	113259235	chr11	113258356	113258512	CTCF,L3MBTL2,ASH2L,PHF8,HDAC2,KDM4A,POLR2A,REST,TBP,TAF7,MAX,YY1,JUND,NANOG,EP300,TAF1,FOSL1,RAD21,TCF12,ZNF143	chr11	113258227	113259256	chr11	113258356
chr11	113258356	113259074	0.257780507780508	0.0528545980143075	0.6	0.343303571428571	0.656605260808937	0.604296178932239	49	1.0570636821165e-15	chr11	113258513	113258791	FirstExon	+	ANKK1	protein_coding	chr11	113258513	113258791	0.387186629526462	1	CpG: 39	chr11	113258443	113258821	chr11	113258513	113258791	*	*	*	*	*	0	0	chr11-113257660:113259235	chr11	113257660	113259235	chr11	113258513	113258791	CTCF,L3MBTL2,ASH2L,PHF8,HDAC2,KDM4A,POLR2A,REST,TBP,TAF7,MAX,YY1,JUND,NANOG,EP300,TAF1,FOSL1,RAD21,TCF12,ZNF143	chr11	113258227	113259256	chr11	113258513
chr11	113258356	113259074	0.257780507780508	0.0528545980143075	0.6	0.343303571428571	0.656605260808937	0.604296178932239	49	1.0570636821165e-15	chr11	113258792	113264202	Intron1	+	ANKK1	protein_coding	chr11	113258792	113259074	0.392757660167131	0.0521256931608133	CpG: 39	chr11	113258443	113258821	chr11	113258792	113258821	*	*	*	*	*	0	0	chr11-113257660:113259235	chr11	113257660	113259235	chr11	113258792	113259074	CTCF,L3MBTL2,ASH2L,PHF8,HDAC2,KDM4A,POLR2A,REST,TBP,TAF7,MAX,YY1,JUND,NANOG,EP300,TAF1,FOSL1,RAD21,TCF12,ZNF143	chr11	113258227	113259256	chr11	113258792
chr11	117666679	117667534	0.214285714285714	-0.331725873419157	0.875	0.666666666666667	0.450676700585984	0.752302996519451	68	2.18839156791794e-13	chr11	117651526	117667748	Intron1	-	DSCAML1	protein_coding	chr11	117666679	117667534	1	0.0527062014548145	CpG: 124	chr11	117666634	117668141	chr11	117666679	117667534	*	*	*	*	*	0	0	chr11-117666045:117667515	chr11	117666045	117667515	chr11	117666679	117667515	EZH2,EGR1,ASH2L,SUZ12,GATA2,MYC,E2F8,AGO1,GATA3,SIN3A,ZNF444,CTCF,KDM4A,AGO2,HNRNPLL,SIN3A,RAD21	chr11	117665688	117669095	chr11	117666679
chr11	121508064	121513526	0.200581395348837	-0.39579309855669	0.916666666666667	0.709677419354839	0.417209722462608	0.819956119633914	94	2.32235389814436e-18	*	*	*	InterGenic	*	*	*	*	*	*	*	*	*	*	*	*	*	0	0	*	*	*	*	*	0	0	chr11-121512560:121512790	chr11	121512560	121512790	chr11	121512560	121512790	FOXA2	chr11	121508836	121509236	chr11	121508836
chr11	122418821	122426762	0.219845513963161	-0.194856795786833	0.804761904761905	0.573593073593073	0.659495898860405	0.886448183341553	105	7.79230741227426e-13	*	*	*	InterGenic	*	*	*	*	*	*	*	*	*	*	*	*	*	0	0	*	*	*	*	*	0	0	chr11-122419800:122420135	chr11	122419800	122420135	chr11	122419800	122420135	NFE2	chr11	122426404	122426668	chr11	122426404
chr11	132558664	132558845	0.209558823529412	-0.117796314165939	0.647058823529412	0.382978723404255	0.679386560548651	0.854389742564473	18	0.00648726361376152	chr11	132527215	132812820	Intron2	-	OPCML	protein_coding	chr11	132558664	132558845	1	0.000633742406470475	*	*	*	*	*	0	0	*	*	*	*	*	0	0	*	*	*	*	*	0	0	MAFF,MAFK	chr11	132558809	132559079	chr11	132558809
chr12	270736	273969	0.325053475935829	-0.102960338810855	0.699095022624434	0.346728307254623	0.708604861231304	0.821188522892198	77	1.79792744150611e-15	chr12	266861	271091	Intron7	+	IQSEC3	protein_coding	chr12	270736	271091	0.109805134549954	0.0839243498817967	*	*	*	*	*	0	0	*	*	*	*	*	0	0	chr12-270625:270775	chr12	270625	270775	chr12	270736	270775	*	*	*	*	*	0
chr12	270736	273969	0.325053475935829	-0.102960338810855	0.699095022624434	0.346728307254623	0.708604861231304	0.821188522892198	77	1.79792744150611e-15	chr12	271092	271231	Exon8	+	IQSEC3	protein_coding	chr12	271092	271231	0.0429941231054748	1	*	*	*	*	*	0	0	*	*	*	*	*	0	0	*	*	*	*	*	0	0	CREB1	chr12	271117	271303	chr12	271117
chr12	270736	273969	0.325053475935829	-0.102960338810855	0.699095022624434	0.346728307254623	0.708604861231304	0.821188522892198	77	1.79792744150611e-15	chr12	271232	272659	Intron8	+	IQSEC3	protein_coding	chr12	271232	272659	0.441385709866997	1	*	*	*	*	*	0	0	*	*	*	*	*	0	0	chr12-271720:272075	chr12	271720	272075	chr12	271720	272075	CREB1	chr12	271117	271303	chr12	271232
chr12	270736	273969	0.325053475935829	-0.102960338810855	0.699095022624434	0.346728307254623	0.708604861231304	0.821188522892198	77	1.79792744150611e-15	chr12	272660	272785	Exon9	+	IQSEC3	protein_coding	chr12	272660	272785	0.0386637797711104	1	*	*	*	*	*	0	0	*	*	*	*	*	0	0	*	*	*	*	*	0	0	*	*	*	*	*	0
chr12	270736	273969	0.325053475935829	-0.102960338810855	0.699095022624434	0.346728307254623	0.708604861231304	0.821188522892198	77	1.79792744150611e-15	chr12	272786	274599	Intron9	+	IQSEC3	protein_coding	chr12	272786	273969	0.365914011753789	0.652509652509653	*	*	*	*	*	0	0	*	*	*	*	*	0	0	chr12-272940:273170	chr12	272940	273170	chr12	272940	273170	EGR1	chr12	272824	273068	chr12	272824
chr12	270736	273969	0.325053475935829	-0.102960338810855	0.699095022624434	0.346728307254623	0.708604861231304	0.821188522892198	77	1.79792744150611e-15	chr12	273830	273920	LastExon	-	RP11-598F7.5	antisense	chr12	273830	273920	0.0278379214351995	1	*	*	*	*	*	0	0	*	*	*	*	*	0	0	*	*	*	*	*	0	0	L3MBTL2,MAX,E2F6,USF1,POLR2A	chr12	273236	273836	chr12	273830
chr12	270736	273969	0.325053475935829	-0.102960338810855	0.699095022624434	0.346728307254623	0.708604861231304	0.821188522892198	77	1.79792744150611e-15	chr12	273921	274477	Intron1	-	RP11-598F7.5	antisense	chr12	273921	273969	0.0148468914321064	0.0863309352517986	*	*	*	*	*	0	0	*	*	*	*	*	0	0	chr12-273945:274095	chr12	273945	274095	chr12	273945	273969	*	*	*	*	*	0
chr12	5398236	5405278	0.201695353073932	-0.148421895945413	0.75	0.49468085106383	0.689845301652263	0.834561995845951	103	8.26133970327011e-09	chr12	5398645	5399645	Promoter	+	RP11-1038A11.3	lincRNA	chr12	5398645	5399645	0.142005112184039	1	*	*	*	*	*	0	0	*	*	*	*	*	0	0	*	*	*	*	*	0	0	EP400,FOXK2,ELF1,TAF9B,EGR1,GABPB1,NRF1,POLR2A,ZSCAN29	chr12	5399402	5400226	chr12	5399402
chr12	5398236	5405278	0.201695353073932	-0.148421895945413	0.75	0.49468085106383	0.689845301652263	0.834561995845951	103	8.26133970327011e-09	chr12	5399646	5399790	FirstExon	+	RP11-1038A11.3	lincRNA	chr12	5399646	5399790	0.0204487361545016	1	*	*	*	*	*	0	0	*	*	*	*	*	0	0	*	*	*	*	*	0	0	EP400,FOXK2,ELF1,TAF9B,EGR1,GABPB1,NRF1,POLR2A,ZSCAN29	chr12	5399402	5400226	chr12	5399646
chr12	5398236	5405278	0.201695353073932	-0.148421895945413	0.75	0.49468085106383	0.689845301652263	0.834561995845951	103	8.26133970327011e-09	chr12	5399791	5401270	Intron1	+	RP11-1038A11.3	lincRNA	chr12	5399791	5401270	0.210025560920193	1	*	*	*	*	*	0	0	*	*	*	*	*	0	0	chr12-5400080:5400230	chr12	5400080	5400230	chr12	5400080	5400230	EP400,FOXK2,ELF1,TAF9B,EGR1,GABPB1,NRF1,POLR2A,ZSCAN29	chr12	5399402	5400226	chr12	5399791
chr12	5398236	5405278	0.201695353073932	-0.148421895945413	0.75	0.49468085106383	0.689845301652263	0.834561995845951	103	8.26133970327011e-09	chr12	5401271	5401344	Exon2	+	RP11-1038A11.3	lincRNA	chr12	5401271	5401344	0.0103663731894348	1	*	*	*	*	*	0	0	*	*	*	*	*	0	0	*	*	*	*	*	0	0	SPI1	chr12	5401178	5401448	chr12	5401271
chr12	5398236	5405278	0.201695353073932	-0.148421895945413	0.75	0.49468085106383	0.689845301652263	0.834561995845951	103	8.26133970327011e-09	chr12	5401345	5476968	Intron2	+	RP11-1038A11.3	lincRNA	chr12	5401345	5405278	0.558506106219824	0.0520079869880856	*	*	*	*	*	0	0	*	*	*	*	*	0	0	chr12-5401485:5401635	chr12	5401485	5401635	chr12	5401485	5401635	SPI1	chr12	5401178	5401448	chr12	5401345
chr12	5540947	5542224	0.230230553759965	-0.0134063676680385	0.625	0.392490372272144	0.653351994078488	0.684631958159844	93	6.39398490809018e-13	chr12	5540277	5541277	Promoter	+	NTF3	protein_coding	chr12	5540947	5541277	0.258418167580266	0.33	CpG: 128	chr12	5541210	5542973	chr12	5541210	5541277	*	*	*	*	*	0	0	chr12-5538805:5541055	chr12	5538805	5541055	chr12	5540947	5541055	EZH2,HDAC2,SP1,RAD21,RNF2,SUZ12,EZH2,KDM4A,TAF1,POLR2A,BHLHE40,RAD21,ASH2L,USF2,EZH2,EP300,RNF2,SUZ12,CTCF,POLR2A,SP1,YY1,EGR1,RXRA,JUND,HNF4G,HNF4A,CTCF,EP300,SMARCA4	chr12	5538843	5544014	chr12	5540947
chr12	5540947	5542224	0.230230553759965	-0.0134063676680385	0.625	0.392490372272144	0.653351994078488	0.684631958159844	93	6.39398490809018e-13	chr12	5541278	5541508	FirstExon	+	NTF3	protein_coding	chr12	5541278	5541508	0.180109631949883	1	CpG: 128	chr12	5541210	5542973	chr12	5541278	5541508	*	*	*	*	*	0	0	chr12-5541145:5543335	chr12	5541145	5543335	chr12	5541278	5541508	EZH2,HDAC2,SP1,RAD21,RNF2,SUZ12,EZH2,KDM4A,TAF1,POLR2A,BHLHE40,RAD21,ASH2L,USF2,EZH2,EP300,RNF2,SUZ12,CTCF,POLR2A,SP1,YY1,EGR1,RXRA,JUND,HNF4G,HNF4A,CTCF,EP300,SMARCA4	chr12	5538843	5544014	chr12	5541278
chr12	5540947	5542224	0.230230553759965	-0.0134063676680385	0.625	0.392490372272144	0.653351994078488	0.684631958159844	93	6.39398490809018e-13	chr12	5541509	5615730	Intron1	+	NTF3	protein_coding	chr12	5541509	5542224	0.559906029757244	0.00963339216663747	CpG: 128	chr12	5541210	5542973	chr12	5541509	5542224	*	*	*	*	*	0	0	chr12-5541145:5543335	chr12	5541145	5543335	chr12	5541509	5542224	EZH2,HDAC2,SP1,RAD21,RNF2,SUZ12,EZH2,KDM4A,TAF1,POLR2A,BHLHE40,RAD21,ASH2L,USF2,EZH2,EP300,RNF2,SUZ12,CTCF,POLR2A,SP1,YY1,EGR1,RXRA,JUND,HNF4G,HNF4A,CTCF,EP300,SMARCA4	chr12	5538843	5544014	chr12	5541509
chr12	8956719	8972254	0.216008566735284	-0.416180105413087	0.9	0.657142857142857	0.425871145606372	0.869079765149747	203	4.01307222555064e-40	chr12	8928981	8983257	Intron1	-	A2ML1-AS1	antisense	chr12	8956719	8972254	1	0.286222271353821	*	*	*	*	*	0	0	chr12:8966613-8966834	chr12	8966613	8966834	chr12	8966613	8966834	chr12-8956965:8957115	chr12	8956965	8957115	chr12	8956965	8957115	ZBTB33	chr12	8956556	8956755	chr12	8956719
chr12	13290095	13294423	0.290620978120978	-0.279061559355319	0.851648351648352	0.44017094017094	0.607794520391304	0.862805286291104	51	6.01524738597074e-09	*	*	*	InterGenic	*	*	*	*	*	*	*	*	*	*	*	*	*	0	0	chr12:13292095-13292429	chr12	13292095	13292429	chr12	13292095	13292429	chr12-13289900:13290170	chr12	13289900	13290170	chr12	13290095	13290170	HNF4A,FOS,JUND	chr12	13289641	13290233	chr12	13290095
chr12	48206547	48207124	0.262599469496021	-0.051580635509211	0.545454545454545	0.290322580645161	0.615479781557005	0.64855343486688	38	1.17732261490858e-10	chr12	48196058	48213549	Intron1	-	HDAC7	protein_coding	chr12	48206547	48207124	1	0.0329883940312161	CpG: 31	chr12	48206721	48207126	chr12	48206721	48207124	*	*	*	*	*	0	0	chr12-48206365:48207655	chr12	48206365	48207655	chr12	48206547	48207124	POLR2A,MAFK,EP300,CTCF,CEBPB,EBF1,USF2,USF1,EGR1,RXRA,GATA2,FOS,EP300,STAT3,MYC,CTCF,NR2F2,ZBTB7A,FOXA1,ZBTB40,TAF1,SMARCA5,POLR2A,TRIM28,KDM1A,ZNF143,CREB3L1,SMARCC2,L3MBTL2,BRD4,REST,DPF2,MTA3,ARNT,TBP,HDAC2,GABPB1,SKIL,NFRKB,TRIM22,RNF2,KDM5B,MTA2,ZEB2,ZBTB5,SMARCA4,ASH2L,GATAD2B,NRF1,ATF7,ZNF184,RBFOX2,MLLT1,EP300,SP1,HDAC1,MYC,BHLHE40,SOX6,EP400,ARID1B,MNT,NBN,GATAD2A,STAT3,ZBTB2,POLR2G,PHF8…	chr12	48203947	48209027	chr12	48206547
chr12	52214036	52215145	0.238297872340426	0.0926081016350281	0.5	0.272727272727273	0.640393230649166	0.535428283651213	130	1.29275918571758e-39	*	*	*	InterGenic	*	*	*	*	*	*	*	*	CpG: 206	chr12	52214179	52216138	chr12	52214179	52215145	*	*	*	*	*	0	0	chr12-52213545:52216395	chr12	52213545	52216395	chr12	52214036	52215145	SUZ12,SMARCA4,ZNF512B,POLR2A,HDAC2,TAF1,CTCF,PHF8,EGR1,NR3C1,ZFX,ASH2L,JUND,NFIB,HNRNPL,RBBP5,YY1,TAF7,MTA1,HCFC1,ZNF24,SIN3A,TRIM22,ELF1,RFX5,ZBTB7A,RAD21,SMARCE1,MYC,NR3C1,E2F6,HDAC6,SMARCA5,EZH2,TAF1,NRF1,TAF7,KDM4A,PHF8,YY1,SUZ12,CTCF,POLR2A	chr12	52213560	52216339	chr12	52214036
chr12	52802989	52804282	0.277777777777777	-0.28744702516678	0.84	0.555555555555556	0.59041965334065	0.8795623101601	74	1.41096995056388e-16	chr12	52801446	52806143	Intron1	+	RP11-1020M18.10	antisense	chr12	52802989	52804282	1	0.275282094954226	*	*	*	*	*	0	0	*	*	*	*	*	0	0	*	*	*	*	*	0	0	*	*	*	*	*	0
chr12	53613448	53614305	0.208020050125313	0.074467574580237	0.45	0.236842105263158	0.607689327424554	0.518609300387988	60	4.26275821095202e-10	chr12	53609579	53621145	Intron3	-	RARG	protein_coding	chr12	53613448	53614305	1	0.0740964897112226	CpG: 108	chr12	53613716	53615103	chr12	53613716	53614305	*	*	*	*	*	0	0	chr12-53610805:53614615	chr12	53610805	53614615	chr12	53613448	53614305	FOS,MNT,MITF,SAP30,SREBF1,FOXA1,EBF1,FOXA2,USF1,NRF1,ZBTB33,BACH1,SIN3A,POLR2A,ETS1,EP300,TCF12,TBP,HDAC2,TAF1,SP1,JUND,RBBP5,KDM4A,TAF7,PHF8,ZNF143,ASH2L,MYC,USF2,USF1,HNRNPL,ELF1,NFE2L2,FOS,SPI1,CEBPB,ZBTB33,EBF1,NR2F1,NR2F6,SUZ12,TCF7L2,SAP30,CDC5L,ZNF639,ZBTB7A,HNRNPK,EP300,EGR1,EZH2,EP300,PRDM10,CTCF,KDM1A,RNF2,L3MBTL2,DPF2,SREBF2,MNT,CREB3L1,EP400,MXI1,MEF2B,POLR2A,MBD2,SIN3A,MGA,NR2F1,EGR1…	chr12	53610122	53619883	chr12	53613448
chr12	62584768	62585415	0.217738205365402	-0.149329190869972	0.732057416267943	0.494186046511628	0.604145617287267	0.740996830610996	61	1.34200516309344e-10	chr12	62417561	62652543	Intron1	-	FAM19A2	protein_coding	chr12	62584768	62585415	1	0.00275340238826804	CpG: 119	chr12	62584768	62586268	chr12	62584768	62585415	*	*	*	*	*	0	0	chr12-62584460:62585990	chr12	62584460	62585990	chr12	62584768	62585415	EZH2,SUZ12,ASH2L,YY1,RNF2,SIN3A,GATA1,PHF8,KDM4A,RBBP5,ZEB1,MXI1,YY1,RAD21,KDM4A,L3MBTL2,POLR2A,ASH2L,GATA1,CTCF,SMC3,RAD21,SIN3A,ZNF217,TBP,ELF1,POLR2A,CTBP1,ELK1,ZNF444,RFX5,TRIM22,CC2D1A,RNF2,HNF4A,MYBL2,NCOA1,EP300,ZNF143,FOXA1,ZNF384,YY1,FOS,RCOR1,ARNT,REST,MAFK	chr12	62583660	62587248	chr12	62584768
chr12	87331375	87339884	0.210526315789474	-0.361072355065654	0.923076923076923	0.657142857142857	0.476637056991957	0.871006730816015	96	7.48931064462414e-16	*	*	*	InterGenic	*	*	*	*	*	*	*	*	*	*	*	*	*	0	0	*	*	*	*	*	0	0	chr12-87339600:87339790	chr12	87339600	87339790	chr12	87339600	87339790	NANOG,EP300	chr12	87339512	87339970	chr12	87339512
chr12	122184655	122186298	0.333188405797102	-0.543838921684255	0.91304347826087	0.583333333333333	0.278577409389077	0.839133571976169	49	5.92104357877207e-17	chr12	122181654	122186231	Intron2	+	TMEM120B	protein_coding	chr12	122184655	122186231	0.959220937309799	0.344330347389119	*	*	*	*	*	0	0	*	*	*	*	*	0	0	chr12-122186125:122187175	chr12	122186125	122187175	chr12	122186125	122186231	TCF7L2,FOXA1,CLOCK,GATAD2A,NFRKB,REST,IKZF1,YY1,ZNF592,RFX5,ZNF687,SIN3A,CBFA2T3,TEAD4,POLR2A,RNF2,ATF3,FOXA2,BCL3,TRIM28,GATA3,SP1,E2F6,SMARCB1,FOXA1,SMARCA5,PML,NR3C1,CREB1,TCF12,GATA2,RBFOX2,MNT,BHLHE40,ATF7,KDM1A,NCOA3,MGA,EP400,E2F1,L3MBTL2,GMEB1,CREB3L1,ZNF24,CREM,GABPB1,E4F1,ZHX2,PRDM10,HDAC2,NCOA1,FOS,AFF1,MTA3,ATF2,ZEB2,DPF2,ARNT,ELF1,SREBF1,ZBTB33,ESRRA,TRIM24,ZNF639,RAD51,SMARCA4,E2F8,…	chr12	122186116	122187545	chr12	122186116
chr12	122184655	122186298	0.333188405797102	-0.543838921684255	0.91304347826087	0.583333333333333	0.278577409389077	0.839133571976169	49	5.92104357877207e-17	chr12	122186232	122186348	Exon3	+	TMEM120B	protein_coding	chr12	122186232	122186298	0.0401704199634814	0.568965517241379	*	*	*	*	*	0	0	*	*	*	*	*	0	0	chr12-122186125:122187175	chr12	122186125	122187175	chr12	122186232	122186298	TCF7L2,FOXA1,CLOCK,GATAD2A,NFRKB,REST,IKZF1,YY1,ZNF592,RFX5,ZNF687,SIN3A,CBFA2T3,TEAD4,POLR2A,RNF2,ATF3,FOXA2,BCL3,TRIM28,GATA3,SP1,E2F6,SMARCB1,FOXA1,SMARCA5,PML,NR3C1,CREB1,TCF12,GATA2,RBFOX2,MNT,BHLHE40,ATF7,KDM1A,NCOA3,MGA,EP400,E2F1,L3MBTL2,GMEB1,CREB3L1,ZNF24,CREM,GABPB1,E4F1,ZHX2,PRDM10,HDAC2,NCOA1,FOS,AFF1,MTA3,ATF2,ZEB2,DPF2,ARNT,ELF1,SREBF1,ZBTB33,ESRRA,TRIM24,ZNF639,RAD51,SMARCA4,E2F8,…	chr12	122186116	122187545	chr12	122186232
chr12	123992673	124000144	0.200961824123589	-0.346207811842812	0.890873015873016	0.677209302325582	0.496948210935954	0.835233068612296	109	1.40782127552083e-23	chr12	123984084	124008041	Intron2	-	RILPL1	protein_coding	chr12	123992673	124000144	1	0.31185039863088	*	*	*	*	*	0	0	*	*	*	*	*	0	0	chr12-123999825:123999975	chr12	123999825	123999975	chr12	123999825	123999975	ZBTB33	chr12	123999897	124000353	chr12	123999897
chr12	124920087	124926333	0.205882352941176	-0.32056299914207	0.869565217391304	0.647058823529412	0.496822856910943	0.829763592195235	140	7.48717350609271e-29	chr12	124915334	124922475	Intron9	-	NCOR2	protein_coding	chr12	124920087	124922475	0.382324687800192	0.33440694580591	*	*	*	*	*	0	0	*	*	*	*	*	0	0	chr12-124922025:124922415	chr12	124922025	124922415	chr12	124922025	124922415	AGO2,KDM1A,ZNF143,HDAC2,SMARCA5,POLR2A,ZNF444,NFXL1,CBX1,POLR2G,BCOR,RBM25,ZMYM3,ZKSCAN1,IKZF1,ATF7,CTBP1,ATF2,CTCF,ATF3,JUND,JUN	chr12	124919984	124921426	chr12	124920087
chr12	124920087	124926333	0.205882352941176	-0.32056299914207	0.869565217391304	0.647058823529412	0.496822856910943	0.829763592195235	140	7.48717350609271e-29	chr12	124922476	124922542	Exon9	-	NCOR2	protein_coding	chr12	124922476	124922542	0.010566762728146	1	*	*	*	*	*	0	0	*	*	*	*	*	0	0	*	*	*	*	*	0	0	*	*	*	*	*	0
chr12	124920087	124926333	0.205882352941176	-0.32056299914207	0.869565217391304	0.647058823529412	0.496822856910943	0.829763592195235	140	7.48717350609271e-29	chr12	124922543	124934360	Intron8	-	NCOR2	protein_coding	chr12	124922543	124926333	0.606788344540506	0.320724380130321	*	*	*	*	*	0	0	chr12:124926088-124926324	chr12	124926088	124926324	chr12	124926088	124926324	chr12-124926120:124926355	chr12	124926120	124926355	chr12	124926120	124926333	NR2F2,SP1,RAD21,POLR2A,TAF1,CEBPB,FOS,JUND,RAD21	chr12	124925567	124926361	chr12	124925567
chr12	130339858	130343918	0.202380952380952	-0.194190323002083	0.7	0.464102564102565	0.628878825533463	0.817960943709918	113	1.32918082288817e-14	chr12	130185244	130387805	Intron1	-	TMEM132D	protein_coding	chr12	130339858	130343918	1	0.0200433449676887	CpG: 256	chr12	130339683	130343584	chr12	130339858	130343584	*	*	*	*	*	0	0	chr12-130343525:130343675	chr12	130343525	130343675	chr12	130343525	130343675	ELF4,ZBTB40	chr12	130343738	130344097	chr12	130343738
chr12	130339858	130343918	0.202380952380952	-0.194190323002083	0.7	0.464102564102565	0.628878825533463	0.817960943709918	113	1.32918082288817e-14	chr12	130339490	130340490	Promoter	-	RP11-572C21.1	lincRNA	chr12	130339858	130340490	0.155665024630542	0.632	CpG: 256	chr12	130339683	130343584	chr12	130339858	130340490	*	*	*	*	*	0	0	*	*	*	*	*	0	0	*	*	*	*	*	0
chr12	132113052	132115346	0.211111111111111	0.00518485140862501	0.541666666666667	0.304347826086957	0.813468005906976	0.832042284917261	66	9.20087258805773e-07	*	*	*	InterGenic	*	*	*	*	*	*	*	*	*	*	*	*	*	0	0	*	*	*	*	*	0	0	chr12-132115125:132115275	chr12	132115125	132115275	chr12	132115125	132115275	*	*	*	*	*	0
chr12	132570017	132585392	0.214295392953929	-0.390561439628132	0.897368421052632	0.644957983193277	0.43056399904602	0.854026443539373	239	6.05430995102461e-51	chr12	132568945	132575393	Intron1	+	EP400NL	protein_coding	chr12	132570017	132575393	0.349658536585366	0.833746898263027	*	*	*	*	*	0	0	*	*	*	*	*	0	0	chr12-132574160:132574370	chr12	132574160	132574370	chr12	132574160	132574370	ZMYM3,HMBOX1	chr12	132573925	132574707	chr12	132573925
chr12	132570017	132585392	0.214295392953929	-0.390561439628132	0.897368421052632	0.644957983193277	0.43056399904602	0.854026443539373	239	6.05430995102461e-51	chr12	132575394	132575488	Exon2	+	EP400NL	protein_coding	chr12	132575394	132575488	0.00611382113821138	1	*	*	*	*	*	0	0	*	*	*	*	*	0	0	*	*	*	*	*	0	0	*	*	*	*	*	0
chr12	132570017	132585392	0.214295392953929	-0.390561439628132	0.897368421052632	0.644957983193277	0.43056399904602	0.854026443539373	239	6.05430995102461e-51	chr12	132575489	132575939	Intron2	+	EP400NL	protein_coding	chr12	132575489	132575939	0.0292682926829268	1	*	*	*	*	*	0	0	*	*	*	*	*	0	0	*	*	*	*	*	0	0	*	*	*	*	*	0
chr12	132570017	132585392	0.214295392953929	-0.390561439628132	0.897368421052632	0.644957983193277	0.43056399904602	0.854026443539373	239	6.05430995102461e-51	chr12	132575940	132576061	Exon3	+	EP400NL	protein_coding	chr12	132575940	132576061	0.00786991869918699	1	*	*	*	*	*	0	0	*	*	*	*	*	0	0	*	*	*	*	*	0	0	*	*	*	*	*	0
chr12	132570017	132585392	0.214295392953929	-0.390561439628132	0.897368421052632	0.644957983193277	0.43056399904602	0.854026443539373	239	6.05430995102461e-51	chr12	132576062	132588541	Intron3	+	EP400NL	protein_coding	chr12	132576062	132585392	0.606829268292683	0.74765606218447	*	*	*	*	*	0	0	*	*	*	*	*	0	0	chr12-132585065:132585215	chr12	132585065	132585215	chr12	132585065	132585215	AGO2,POLR2A,POLR2G	chr12	132584561	132585572	chr12	132584561
chr12	132706829	132816473	0.27037037037037	-0.22272730379969	0.75	0.461538461538462	0.612197222702993	0.827819531114783	114	1.2222840731113e-21	chr12	132688236	132824462	Intron6	-	GALNT9	protein_coding	chr12	132706829	132816473	1	0.80486838048537	*	*	*	*	*	0	0	chr12:132812275-132812555	chr12	132812275	132812555	chr12	132812275	132812555	chr12-132816045:132816195	chr12	132816045	132816195	chr12	132816045	132816195	POLR2A,FOXA1,ZKSCAN1,DPF2,HDAC2,ZNF444,SP1,ZNF592,CTBP1,CTCF,TCF12,BCOR,ARNT,SUZ12,NEUROD1	chr12	132810036	132810829	chr12	132810036
chr12	132872343	132873355	0.226053639846744	-0.269590607474173	0.761904761904762	0.5	0.634759609516619	0.908457007442928	42	2.25335545533428e-09	chr12	132863017	132905551	Intron1	-	GALNT9	protein_coding	chr12	132872343	132873355	1	0.0237927305214652	CpG: 21	chr12	132872343	132872586	chr12	132872343	132872586	*	*	*	*	*	0	0	*	*	*	*	*	0	0	*	*	*	*	*	0
chr12	132964128	132965878	0.24780701754386	-0.118742479713522	0.711851851851852	0.453413940256046	0.767547766864768	0.893810698770199	49	8.22854479384795e-09	*	*	*	InterGenic	*	*	*	*	*	*	*	*	CpG: 21	chr12	132965817	132966082	chr12	132965817	132965878	*	*	*	*	*	0	0	chr12-132965585:132965795	chr12	132965585	132965795	chr12	132965585	132965795	EGR1	chr12	132963821	132964265	chr12	132964128
chr12	133504334	133513922	0.242081447963801	0.018163730632229	0.590909090909091	0.333333333333333	0.709361759630465	0.67831363798541	50	1.10404292571824e-07	chr12	133503749	133509620	Intron4	-	ZNF605	protein_coding	chr12	133504334	133509620	0.551314142678348	0.900357690342361	*	*	*	*	*	0	0	*	*	*	*	*	0	0	chr12-133508945:133509275	chr12	133508945	133509275	chr12	133508945	133509275	ZNF274	chr12	133504488	133505501	chr12	133504488
chr12	133504334	133513922	0.242081447963801	0.018163730632229	0.590909090909091	0.333333333333333	0.709361759630465	0.67831363798541	50	1.10404292571824e-07	chr12	133509621	133509741	Exon4	-	ZNF605	protein_coding	chr12	133509621	133509741	0.0125156445556946	1	*	*	*	*	*	0	0	*	*	*	*	*	0	0	*	*	*	*	*	0	0	*	*	*	*	*	0
chr12	133504334	133513922	0.242081447963801	0.018163730632229	0.590909090909091	0.333333333333333	0.709361759630465	0.67831363798541	50	1.10404292571824e-07	chr12	133509742	133522206	Intron3	-	ZNF605	protein_coding	chr12	133509742	133513922	0.435961618690029	0.335365853658537	*	*	*	*	*	0	0	*	*	*	*	*	0	0	chr12-133512740:133513090	chr12	133512740	133513090	chr12	133512740	133513090	*	*	*	*	*	0
chr13	19410208	19411725	0.221870286576169	-0.371717662184291	0.833333333333333	0.596296296296297	0.483066989039854	0.840084134221675	67	5.54948774823527e-13	*	*	*	InterGenic	*	*	*	*	*	*	*	*	*	*	*	*	*	0	0	*	*	*	*	*	0	0	*	*	*	*	*	0	0	DPF2,ARID1B,FOXK2,TRIM24,NR2F1,MNT,NCOR1,HDAC2,NFIC,SOX6,TAL1,TCF12,CBFA2T3,MGA,CBFA2T2,ZBTB33	chr13	19409724	19410917	chr13	19410208
chr13	19558990	19572271	0.238095238095238	0	0.583333333333333	0.3125	0.679386560548651	0.718546354076522	74	2.35272921327019e-06	*	*	*	InterGenic	*	*	*	*	*	*	*	*	*	*	*	*	*	0	0	*	*	*	*	*	0	0	chr13-19564385:19564535	chr13	19564385	19564535	chr13	19564385	19564535	HNF4A,FOS	chr13	19565144	19565548	chr13	19565144
chr13	21034485	21036411	0.266666666666667	0.0159785376315881	0.590909090909091	0.296296296296296	0.625	0.598156138286816	34	5.30384632857632e-08	chr13	21013894	21063508	Intron3	-	CRYL1	protein_coding	chr13	21034485	21036411	1	0.0388196879912928	*	*	*	*	*	0	0	*	*	*	*	*	0	0	chr13-21034960:21035255	chr13	21034960	21035255	chr13	21034960	21035255	MAFK,MAFF	chr13	21034265	21034645	chr13	21034485
chr13	26760331	26761074	0.236074270557029	0.0345853702560855	0.583333333333333	0.352484472049689	0.59568136719357	0.527759349349521	77	3.97936163220445e-23	chr13	26706590	26789610	Intron5	-	RNF6	protein_coding	chr13	26760331	26761074	1	0.00894965068658155	CpG: 50	chr13	26760421	26760892	chr13	26760421	26760892	chr13:26760531-26760858	chr13	26760531	26760858	chr13	26760531	26760858	chr13-26760285:26760915	chr13	26760285	26760915	chr13	26760331	26760915	YY1,HNF4A,RXRA,SP1,IKZF2,TBX21,MEF2B,MTA2,HDAC1,DPF2,ZNF592,RBBP5,PHF8,REST,SPI1,SIN3A,TAF1,ZBTB33,IKZF1,ATF2,MNT,CTCF,KDM1A,L3MBTL2,MYC,CREM,IRF4,NFIC,ASH2L,GMEB1,PKNOX1,MGA,SMARCA5,POLR2A,ZNF407,TRIM22,RBFOX2,GATAD2B,PTBP1,RAD21,NRF1,EED,TCF7L2,SETDB1,RNF2,ZNF687,ASH1L,BHLHE40,POLR2G,MAX,ZFX,ZNF282,TAF15,ARID3A,MXI1,NFYB,EP300,E2F6,SMARCA4,ZNF639,CREB3L1,ATF7,PHF20,KDM4A,KDM5A,USF2,SKI,FUS,ESRR…	chr13	26759735	26761752	chr13	26760331
chr13	27630101	27648467	0.202202997007897	-0.383446203920733	0.894736842105263	0.69631093544137	0.412213580647056	0.818440464728416	185	4.09068562342613e-36	chr13	27640293	27643521	LastExon	-	USP12	protein_coding	chr13	27640293	27643521	0.175759555700751	1	*	*	*	*	*	0	0	*	*	*	*	*	0	0	chr13-27641660:27641990	chr13	27641660	27641990	chr13	27641660	27641990	ZMYM3,BCOR,RBM25	chr13	27640226	27640672	chr13	27640293
chr13	27630101	27648467	0.202202997007897	-0.383446203920733	0.894736842105263	0.69631093544137	0.412213580647056	0.818440464728416	185	4.09068562342613e-36	chr13	27643522	27645207	Intron8	-	USP12	protein_coding	chr13	27643522	27645207	0.0917456169007949	1	*	*	*	*	*	0	0	*	*	*	*	*	0	0	*	*	*	*	*	0	0	*	*	*	*	*	0
chr13	27630101	27648467	0.202202997007897	-0.383446203920733	0.894736842105263	0.69631093544137	0.412213580647056	0.818440464728416	185	4.09068562342613e-36	chr13	27645208	27645286	Exon8	-	USP12	protein_coding	chr13	27645208	27645286	0.00424697811172819	1	*	*	*	*	*	0	0	*	*	*	*	*	0	0	*	*	*	*	*	0	0	*	*	*	*	*	0
chr13	27630101	27648467	0.202202997007897	-0.383446203920733	0.894736842105263	0.69631093544137	0.412213580647056	0.818440464728416	185	4.09068562342613e-36	chr13	27645287	27649327	Intron7	-	USP12	protein_coding	chr13	27645287	27648467	0.173146030708919	0.787128712871287	*	*	*	*	*	0	0	*	*	*	*	*	0	0	chr13-27645465:27645615	chr13	27645465	27645615	chr13	27645465	27645615	ZNF316	chr13	27646054	27646464	chr13	27646054
chr13	36888447	36895199	0.214285714285714	-0.312190841169325	0.882352941176471	0.666666666666667	0.412213580647056	0.733229264910443	86	1.69898285487501e-23	chr13	36888364	36888558	Exon6	-	SPG20	protein_coding	chr13	36888447	36888558	0.0164395734597156	0.572164948453608	*	*	*	*	*	0	0	*	*	*	*	*	0	0	*	*	*	*	*	0	0	*	*	*	*	*	0
chr13	36888447	36895199	0.214285714285714	-0.312190841169325	0.882352941176471	0.666666666666667	0.412213580647056	0.733229264910443	86	1.69898285487501e-23	chr13	36888559	36900711	Intron5	-	SPG20	protein_coding	chr13	36888559	36895199	0.983412322274882	0.54641211323239	*	*	*	*	*	0	0	*	*	*	*	*	0	0	chr13-36889060:36889375	chr13	36889060	36889375	chr13	36889060	36889375	*	*	*	*	*	0
chr13	39766232	39768395	-0.223776223776224	0.0485029352417491	0.583333333333333	0.827586206896552	0.709361759630465	0.710531372038311	12	0.0325872710426173	*	*	*	InterGenic	*	*	*	*	*	*	*	*	*	*	*	*	*	0	0	*	*	*	*	*	0	0	*	*	*	*	*	0	0	*	*	*	*	*	0
chr13	101097881	101106373	0.209184726522188	-0.299881886171672	0.857142857142857	0.644009216589862	0.500045390934735	0.810147812063974	101	7.18864599703315e-22	chr13	101077986	101101505	Intron20	+	PCCA	protein_coding	chr13	101097881	101101505	0.426754592557701	0.154088184021429	*	*	*	*	*	0	0	*	*	*	*	*	0	0	chr13-101100200:101100415	chr13	101100200	101100415	chr13	101100200	101100415	*	*	*	*	*	0
chr13	101097881	101106373	0.209184726522188	-0.299881886171672	0.857142857142857	0.644009216589862	0.500045390934735	0.810147812063974	101	7.18864599703315e-22	chr13	101101506	101101559	Exon21	+	PCCA	protein_coding	chr13	101101506	101101559	0.0062411681582666	1	*	*	*	*	*	0	0	*	*	*	*	*	0	0	*	*	*	*	*	0	0	*	*	*	*	*	0
chr13	101097881	101106373	0.209184726522188	-0.299881886171672	0.857142857142857	0.644009216589862	0.500045390934735	0.810147812063974	101	7.18864599703315e-22	chr13	101101560	101167680	Intron21	+	PCCA	protein_coding	chr13	101101560	101106373	0.566768723504475	0.0727918935269208	*	*	*	*	*	0	0	*	*	*	*	*	0	0	chr13-101102165:101102315	chr13	101102165	101102315	chr13	101102165	101102315	HNRNPK,CTCF	chr13	101104037	101104541	chr13	101104037
chr13	113760312	113763663	0.209427767354597	-0.18929133175695	0.739130434782609	0.541698841698842	0.705279710946643	0.892656932174047	189	1.93044353250945e-25	chr13	113760220	113761158	Intron1	+	F7	protein_coding	chr13	113760312	113761158	0.252461951656222	0.901918976545842	*	*	*	*	*	0	0	*	*	*	*	*	0	0	chr13-113761085:113761575	chr13	113761085	113761575	chr13	113761085	113761158	HNRNPK,NFIC,IKZF1,GATA3,ARID1B,EGR1	chr13	113760954	113761694	chr13	113760954
chr13	113760312	113763663	0.209427767354597	-0.18929133175695	0.739130434782609	0.541698841698842	0.705279710946643	0.892656932174047	189	1.93044353250945e-25	chr13	113761159	113761224	Exon2	+	F7	protein_coding	chr13	113761159	113761224	0.0193971948672038	1	*	*	*	*	*	0	0	*	*	*	*	*	0	0	chr13-113761085:113761575	chr13	113761085	113761575	chr13	113761159	113761224	HNRNPK,NFIC,IKZF1,GATA3,ARID1B,EGR1	chr13	113760954	113761694	chr13	113761159
chr13	113760312	113763663	0.209427767354597	-0.18929133175695	0.739130434782609	0.541698841698842	0.705279710946643	0.892656932174047	189	1.93044353250945e-25	chr13	113761225	113765003	Intron2	+	F7	protein_coding	chr13	113761225	113763663	0.727544016711429	0.645314981471678	CpG: 369	chr13	113761566	113765534	chr13	113761566	113763663	*	*	*	*	*	0	0	chr13-113763505:113763755	chr13	113763505	113763755	chr13	113763505	113763663	RBM39,ASH2L,SUZ12,POLR2A,RBFOX2,USF1,PHF8,GABPA,EZH2,KDM4A,RNF2,BACH1,KDM4A,HNRNPL	chr13	113763635	113766077	chr13	113763635
chr13	114535321	114538731	0.200534759358289	-0.304064173106984	0.88	0.655172413793103	0.477335404180193	0.787366763805699	154	7.01926457435703e-34	chr13	114518665	114536464	Intron1	+	GAS6-AS1	antisense	chr13	114535321	114536464	0.335190615835777	0.0642170908478004	CpG: 49	chr13	114534708	114535359	chr13	114535321	114535359	*	*	*	*	*	0	0	chr13-114536285:114536555	chr13	114536285	114536555	chr13	114536285	114536464	TCF12,HNF4A,REST,SP1,RXRA,NR2F2,HNRNPL,FOSL2,MAFK,FOXA1,JUND,MAFF,ATF3,FOS,NFE2L2,POLR2G	chr13	114535156	114535859	chr13	114535321
chr13	114535321	114538731	0.200534759358289	-0.304064173106984	0.88	0.655172413793103	0.477335404180193	0.787366763805699	154	7.01926457435703e-34	chr13	114536465	114536552	Exon2	+	GAS6-AS1	antisense	chr13	114536465	114536552	0.0255131964809384	1	*	*	*	*	*	0	0	*	*	*	*	*	0	0	chr13-114536285:114536555	chr13	114536285	114536555	chr13	114536465	114536552	NCOA3,ESR1,PKNOX1,CREB1,EP300,SIN3A	chr13	114536476	114537229	chr13	114536476
chr13	114535321	114538731	0.200534759358289	-0.304064173106984	0.88	0.655172413793103	0.477335404180193	0.787366763805699	154	7.01926457435703e-34	chr13	114536553	114537550	Intron2	+	GAS6-AS1	antisense	chr13	114536553	114537550	0.292375366568915	1	CpG: 28	chr13	114537440	114537790	chr13	114537440	114537550	*	*	*	*	*	0	0	chr13-114537500:114537655	chr13	114537500	114537655	chr13	114537500	114537550	NCOA3,ESR1,PKNOX1,CREB1,EP300,SIN3A	chr13	114536476	114537229	chr13	114536553
chr13	114535321	114538731	0.200534759358289	-0.304064173106984	0.88	0.655172413793103	0.477335404180193	0.787366763805699	154	7.01926457435703e-34	chr13	114537551	114537737	Exon3	+	GAS6-AS1	antisense	chr13	114537551	114537737	0.0545454545454545	1	CpG: 28	chr13	114537440	114537790	chr13	114537551	114537737	*	*	*	*	*	0	0	chr13-114537665:114537955	chr13	114537665	114537955	chr13	114537665	114537737	POLR2A	chr13	114537707	114538271	chr13	114537707
chr13	114535321	114538731	0.200534759358289	-0.304064173106984	0.88	0.655172413793103	0.477335404180193	0.787366763805699	154	7.01926457435703e-34	chr13	114537738	114541049	Intron3	+	GAS6-AS1	antisense	chr13	114537738	114538731	0.291202346041056	0.299909392932649	CpG: 24	chr13	114538394	114538673	chr13	114538394	114538673	*	*	*	*	*	0	0	chr13-114538500:114539230	chr13	114538500	114539230	chr13	114538500	114538731	ESR1,CTCF,RUNX3,FOS,RAD21	chr13	114538607	114539232	chr13	114538607
chr13	114535321	114538731	0.200534759358289	-0.304064173106984	0.88	0.655172413793103	0.477335404180193	0.787366763805699	154	7.01926457435703e-34	chr13	114535272	114535461	Exon10	-	GAS6	protein_coding	chr13	114535321	114535461	0.0410557184750733	0.740740740740741	CpG: 49	chr13	114534708	114535359	chr13	114535321	114535359	*	*	*	*	*	0	0	chr13-114535145:114535575	chr13	114535145	114535575	chr13	114535321	114535461	TCF12,HNF4A,REST,SP1,RXRA,NR2F2,HNRNPL,FOSL2,MAFK,FOXA1,JUND,MAFF,ATF3,FOS,NFE2L2,POLR2G	chr13	114535156	114535859	chr13	114535321
chr13	114535321	114538731	0.200534759358289	-0.304064173106984	0.88	0.655172413793103	0.477335404180193	0.787366763805699	154	7.01926457435703e-34	chr13	114535462	114535606	Intron9	-	GAS6	protein_coding	chr13	114535462	114535606	0.0422287390029326	1	*	*	*	*	*	0	0	*	*	*	*	*	0	0	chr13-114535145:114535575	chr13	114535145	114535575	chr13	114535462	114535575	TCF12,HNF4A,REST,SP1,RXRA,NR2F2,HNRNPL,FOSL2,MAFK,FOXA1,JUND,MAFF,ATF3,FOS,NFE2L2,POLR2G	chr13	114535156	114535859	chr13	114535462
chr13	114535321	114538731	0.200534759358289	-0.304064173106984	0.88	0.655172413793103	0.477335404180193	0.787366763805699	154	7.01926457435703e-34	chr13	114535607	114535725	Exon9	-	GAS6	protein_coding	chr13	114535607	114535725	0.0346041055718475	1	*	*	*	*	*	0	0	*	*	*	*	*	0	0	*	*	*	*	*	0	0	TCF12,HNF4A,REST,SP1,RXRA,NR2F2,HNRNPL,FOSL2,MAFK,FOXA1,JUND,MAFF,ATF3,FOS,NFE2L2,POLR2G	chr13	114535156	114535859	chr13	114535607
chr13	114535321	114538731	0.200534759358289	-0.304064173106984	0.88	0.655172413793103	0.477335404180193	0.787366763805699	154	7.01926457435703e-34	chr13	114535726	114537523	Intron8	-	GAS6	protein_coding	chr13	114535726	114537523	0.526979472140762	1	CpG: 28	chr13	114537440	114537790	chr13	114537440	114537523	*	*	*	*	*	0	0	chr13-114537500:114537655	chr13	114537500	114537655	chr13	114537500	114537523	NCOA3,ESR1,PKNOX1,CREB1,EP300,SIN3A	chr13	114536476	114537229	chr13	114536476
chr13	114535321	114538731	0.200534759358289	-0.304064173106984	0.88	0.655172413793103	0.477335404180193	0.787366763805699	154	7.01926457435703e-34	chr13	114537524	114537645	Exon8	-	GAS6	protein_coding	chr13	114537524	114537645	0.0354838709677419	1	CpG: 28	chr13	114537440	114537790	chr13	114537524	114537645	*	*	*	*	*	0	0	chr13-114537500:114537655	chr13	114537500	114537655	chr13	114537524	114537645	*	*	*	*	*	0
chr13	114535321	114538731	0.200534759358289	-0.304064173106984	0.88	0.655172413793103	0.477335404180193	0.787366763805699	154	7.01926457435703e-34	chr13	114537646	114538485	Intron7	-	GAS6	protein_coding	chr13	114537646	114538485	0.246041055718475	1	CpG: 24	chr13	114538394	114538673	chr13	114538394	114538485	*	*	*	*	*	0	0	chr13-114538085:114538355	chr13	114538085	114538355	chr13	114538085	114538355	POLR2A	chr13	114537707	114538271	chr13	114537707
chr13	114535321	114538731	0.200534759358289	-0.304064173106984	0.88	0.655172413793103	0.477335404180193	0.787366763805699	154	7.01926457435703e-34	chr13	114538486	114538608	Exon7	-	GAS6	protein_coding	chr13	114538486	114538608	0.0357771260997067	1	CpG: 24	chr13	114538394	114538673	chr13	114538486	114538608	*	*	*	*	*	0	0	chr13-114538500:114539230	chr13	114538500	114539230	chr13	114538500	114538608	ESR1,CTCF,RUNX3,FOS,RAD21	chr13	114538607	114539232	chr13	114538607
chr13	114535321	114538731	0.200534759358289	-0.304064173106984	0.88	0.655172413793103	0.477335404180193	0.787366763805699	154	7.01926457435703e-34	chr13	114538609	114541041	Intron6	-	GAS6	protein_coding	chr13	114538609	114538731	0.0357771260997067	0.0501644736842105	CpG: 24	chr13	114538394	114538673	chr13	114538609	114538673	*	*	*	*	*	0	0	chr13-114538500:114539230	chr13	114538500	114539230	chr13	114538609	114538731	ESR1,CTCF,RUNX3,FOS,RAD21	chr13	114538607	114539232	chr13	114538609
chr13	114538733	114540422	0.206597222222222	0.156811390737186	0.535714285714286	0.264912280701754	0.88602381583089	0.711887543051044	35	1.53182465212562e-05	chr13	114537738	114541049	Intron3	+	GAS6-AS1	antisense	chr13	114538733	114540422	1	0.510117789187557	*	*	*	*	*	0	0	*	*	*	*	*	0	0	chr13-114539905:114540490	chr13	114539905	114540490	chr13	114539905	114540422	PCBP1,HNRNPK,SP1,CTCF,TCF12,EP300,NR3C1,JUND,POLR2A,SIN3A,RBBP5,MXI1,SMARCA4,STAT3,FOS,MYC,ZFX,TCF7L2,NR2F2,UBTF,MAX,JUND,YY1,RXRA,EP300,HNF4A,USF2,ESR1,TAF1,FOS,ATF3,NR3C1,REST,RAD21,FOSL2,CEBPB,MYC,CTCF,POLR2G	chr13	114539640	114541634	chr13	114539640
chr13	114538733	114540422	0.206597222222222	0.156811390737186	0.535714285714286	0.264912280701754	0.88602381583089	0.711887543051044	35	1.53182465212562e-05	chr13	114538609	114541041	Intron6	-	GAS6	protein_coding	chr13	114538733	114540422	1	0.694490131578947	*	*	*	*	*	0	0	*	*	*	*	*	0	0	chr13-114539905:114540490	chr13	114539905	114540490	chr13	114539905	114540422	PCBP1,HNRNPK,SP1,CTCF,TCF12,EP300,NR3C1,JUND,POLR2A,SIN3A,RBBP5,MXI1,SMARCA4,STAT3,FOS,MYC,ZFX,TCF7L2,NR2F2,UBTF,MAX,JUND,YY1,RXRA,EP300,HNF4A,USF2,ESR1,TAF1,FOS,ATF3,NR3C1,REST,RAD21,FOSL2,CEBPB,MYC,CTCF,POLR2G	chr13	114539640	114541634	chr13	114539640
chr14	31344185	31345198	0.242072339898427	0.0651961064380565	0.583333333333333	0.310344827586207	0.596106729702	0.529936986903774	61	1.2889314623112e-15	chr14	31344179	31344261	Intron1	+	COCH	protein_coding	chr14	31344185	31344261	0.0750246791707799	0.926829268292683	CpG: 133	chr14	31343355	31344757	chr14	31344185	31344261	*	*	*	*	*	0	0	chr14-31343325:31345155	chr14	31343325	31345155	chr14	31344185	31344261	MLLT1,ARNT,CBX2,HDAC2,EZH2,SOX13,ARID3A,MNT,RNF2,L3MBTL2,MYC,RBFOX2,ZFX,MGA,RXRA,BRD4,POLR2G,ZSCAN29,PML,PTBP1,ZMYM3,ZBTB33,MAX,NCOA6,PHF8,SUZ12,SIN3A,KDM1A,ZNF592,CTCF,POLR2A,ASH2L,CREB3L1,NRF1,RBM22,HNRNPLL,RBBP5,GATAD2B,ZNF217,IKZF1,ZNF207,KDM5A,SKI,ZNF687,MTA3,GABPA,ATF7,ZNF143,BHLHE40,TRIM22,AGO2,SMARCA5,RAD21,SNRNP70,SMARCA4,ZNF24,SRSF4,E2F6,UBTF,FOSL2,HDAC2,TCF12,TAF15,ELF1,XRCC5,HNF4G,SIN…	chr14	31342478	31345353	chr14	31344185
chr14	31344185	31345198	0.242072339898427	0.0651961064380565	0.583333333333333	0.310344827586207	0.596106729702	0.529936986903774	61	1.2889314623112e-15	chr14	31344262	31344309	Exon2	+	COCH	protein_coding	chr14	31344262	31344309	0.0463968410661402	1	CpG: 133	chr14	31343355	31344757	chr14	31344262	31344309	*	*	*	*	*	0	0	chr14-31343325:31345155	chr14	31343325	31345155	chr14	31344262	31344309	MLLT1,ARNT,CBX2,HDAC2,EZH2,SOX13,ARID3A,MNT,RNF2,L3MBTL2,MYC,RBFOX2,ZFX,MGA,RXRA,BRD4,POLR2G,ZSCAN29,PML,PTBP1,ZMYM3,ZBTB33,MAX,NCOA6,PHF8,SUZ12,SIN3A,KDM1A,ZNF592,CTCF,POLR2A,ASH2L,CREB3L1,NRF1,RBM22,HNRNPLL,RBBP5,GATAD2B,ZNF217,IKZF1,ZNF207,KDM5A,SKI,ZNF687,MTA3,GABPA,ATF7,ZNF143,BHLHE40,TRIM22,AGO2,SMARCA5,RAD21,SNRNP70,SMARCA4,ZNF24,SRSF4,E2F6,UBTF,FOSL2,HDAC2,TCF12,TAF15,ELF1,XRCC5,HNF4G,SIN…	chr14	31342478	31345353	chr14	31344262
chr14	31344185	31345198	0.242072339898427	0.0651961064380565	0.583333333333333	0.310344827586207	0.596106729702	0.529936986903774	61	1.2889314623112e-15	chr14	31344310	31346777	Intron2	+	COCH	protein_coding	chr14	31344310	31345198	0.876604146100691	0.359951357924605	CpG: 133	chr14	31343355	31344757	chr14	31344310	31344757	*	*	*	*	*	0	0	chr14-31343325:31345155	chr14	31343325	31345155	chr14	31344310	31345155	MLLT1,ARNT,CBX2,HDAC2,EZH2,SOX13,ARID3A,MNT,RNF2,L3MBTL2,MYC,RBFOX2,ZFX,MGA,RXRA,BRD4,POLR2G,ZSCAN29,PML,PTBP1,ZMYM3,ZBTB33,MAX,NCOA6,PHF8,SUZ12,SIN3A,KDM1A,ZNF592,CTCF,POLR2A,ASH2L,CREB3L1,NRF1,RBM22,HNRNPLL,RBBP5,GATAD2B,ZNF217,IKZF1,ZNF207,KDM5A,SKI,ZNF687,MTA3,GABPA,ATF7,ZNF143,BHLHE40,TRIM22,AGO2,SMARCA5,RAD21,SNRNP70,SMARCA4,ZNF24,SRSF4,E2F6,UBTF,FOSL2,HDAC2,TCF12,TAF15,ELF1,XRCC5,HNF4G,SIN…	chr14	31342478	31345353	chr14	31344310
chr14	34673456	34675004	0.267045454545455	-0.49926725581003	0.954545454545455	0.666666666666667	0.272229696105007	0.842501608427881	34	3.1631793268211e-10	*	*	*	InterGenic	*	*	*	*	*	*	*	*	*	*	*	*	*	0	0	*	*	*	*	*	0	0	chr14-34673765:34673915	chr14	34673765	34673915	chr14	34673765	34673915	ZBTB33,RAD51,IRF5,ZNF282,TBX3,FOXK2,ZKSCAN1	chr14	34673980	34674568	chr14	34673980
chr14	37132178	37133575	0.285714285714286	-0.365116978874146	0.833333333333333	0.588235294117647	0.408131481801995	0.764270372007615	72	3.3894740515862e-19	chr14	37132102	37132728	Exon2	+	PAX9	protein_coding	chr14	37132178	37132728	0.393700787401575	0.878594249201278	CpG: 121	chr14	37131181	37132785	chr14	37132178	37132728	*	*	*	*	*	0	0	chr14-37131660:37132595	chr14	37131660	37132595	chr14	37132178	37132595	EZH2,CBX8,FOS,RNF2,CEBPB,SUZ12,RNF2,GABPA,TCF12,CBX8,ASH2L,AGO1,TCF12,CTCF,NFE2L2,U2AF1,KDM4A,PCBP1,GATA3,CBX2,TCF12,RAD21,SIN3A,ZBTB33,IKZF1,KDM1A,HDAC2,AGO1,ZNF444,TRIM22,ZNF687,SMC3,IKZF2,XRCC5,U2AF2,RBBP5,RBM39,RNF2,SPI1,POLR2A,TAF15,ZNF143,ELF1,HNRNPL,MYC,SP1,HNRNPLL,ZNF579,GATAD2B,ZHX2,HCFC1,PCBP1,POLR2A,ATF3,TCF12,RBBP5,CTCF,POLR2A,CHD1,HNRNPLL,ZBTB33,EGR1,TAF15,PCBP1,HNRNPLL,ZBTB33,CTCF,F…	chr14	37121507	37138116	chr14	37132178
chr14	37132178	37133575	0.285714285714286	-0.365116978874146	0.833333333333333	0.588235294117647	0.408131481801995	0.764270372007615	72	3.3894740515862e-19	chr14	37132729	37135666	Intron2	+	PAX9	protein_coding	chr14	37132729	37133575	0.605583392984968	0.288049029622063	CpG: 121	chr14	37131181	37132785	chr14	37132729	37132785	*	*	*	*	*	0	0	chr14-37132625:37133555	chr14	37132625	37133555	chr14	37132729	37133555	EZH2,CBX8,FOS,RNF2,CEBPB,SUZ12,RNF2,GABPA,TCF12,CBX8,ASH2L,AGO1,TCF12,CTCF,NFE2L2,U2AF1,KDM4A,PCBP1,GATA3,CBX2,TCF12,RAD21,SIN3A,ZBTB33,IKZF1,KDM1A,HDAC2,AGO1,ZNF444,TRIM22,ZNF687,SMC3,IKZF2,XRCC5,U2AF2,RBBP5,RBM39,RNF2,SPI1,POLR2A,TAF15,ZNF143,ELF1,HNRNPL,MYC,SP1,HNRNPLL,ZNF579,GATAD2B,ZHX2,HCFC1,PCBP1,POLR2A,ATF3,TCF12,RBBP5,CTCF,POLR2A,CHD1,HNRNPLL,ZBTB33,EGR1,TAF15,PCBP1,HNRNPLL,ZBTB33,CTCF,F…	chr14	37121507	37138116	chr14	37132729
chr14	51560653	51561300	0.215686274509804	0.156410878064917	0.388888888888889	0.146341463414634	0.586831676588733	0.368771237954945	44	2.10638408859319e-10	chr14	51492079	51560835	Intron1	-	TRIM9	protein_coding	chr14	51560653	51560835	0.28129829984544	0.00264704171272325	CpG: 199	chr14	51560116	51562487	chr14	51560653	51560835	*	*	*	*	*	0	0	chr14-51559925:51561495	chr14	51559925	51561495	chr14	51560653	51560835	ZFX,RFX1,BMI1,USF2,TAF1,PHF8,L3MBTL2,EZH2,USF1,MXI1,POLR2A,KDM4A,EP300,CTCF,HDAC2,RAD21,SUZ12,HDAC6,SMC3,CTBP1,SIN3A,FOXM1,ARNT,FOXA1,RNF2,POLR2A,KDM4A,L3MBTL2,REST,HDAC2,KDM1A,PHF8,RBBP5,SIN3A,MXI1,SMC3,POLR2A,TAF1,ZNF143,RFX5,NRF1,RBM39,MTA1,GATA3,SMARCE1,RAD21,BHLHE40,EP300,AGO1,MYC,PKNOX1,EBF1,CTBP1,MNT,ZEB1,XRCC5,HNRNPLL,CREB1,DPF2,FOSL1,FOXA1,SP1,MBD2,TRIM28,NFYA,IRF3,ZBTB33,ETS1,SUZ12,NFYB…	chr14	51559972	51563502	chr14	51560653
chr14	51560653	51561300	0.215686274509804	0.156410878064917	0.388888888888889	0.146341463414634	0.586831676588733	0.368771237954945	44	2.10638408859319e-10	chr14	51560836	51562779	FirstExon	-	TRIM9	protein_coding	chr14	51560836	51561300	0.717156105100464	0.238805970149254	CpG: 199	chr14	51560116	51562487	chr14	51560836	51561300	*	*	*	*	*	0	0	chr14-51559925:51561495	chr14	51559925	51561495	chr14	51560836	51561300	ZFX,RFX1,BMI1,USF2,TAF1,PHF8,L3MBTL2,EZH2,USF1,MXI1,POLR2A,KDM4A,EP300,CTCF,HDAC2,RAD21,SUZ12,HDAC6,SMC3,CTBP1,SIN3A,FOXM1,ARNT,FOXA1,RNF2,POLR2A,KDM4A,L3MBTL2,REST,HDAC2,KDM1A,PHF8,RBBP5,SIN3A,MXI1,SMC3,POLR2A,TAF1,ZNF143,RFX5,NRF1,RBM39,MTA1,GATA3,SMARCE1,RAD21,BHLHE40,EP300,AGO1,MYC,PKNOX1,EBF1,CTBP1,MNT,ZEB1,XRCC5,HNRNPLL,CREB1,DPF2,FOSL1,FOXA1,SP1,MBD2,TRIM28,NFYA,IRF3,ZBTB33,ETS1,SUZ12,NFYB…	chr14	51559972	51563502	chr14	51560836
chr14	76879436	76881114	0.233628841607565	-0.310349360337364	0.8	0.539180990899899	0.542229616567277	0.859319075116703	63	3.21280611356468e-13	chr14	76842795	76905683	Intron1	+	ESRRB	protein_coding	chr14	76879436	76881114	1	0.0266823559343595	*	*	*	*	*	0	0	*	*	*	*	*	0	0	chr14-76881045:76881315	chr14	76881045	76881315	chr14	76881045	76881114	KDM4A,MAFK	chr14	76880404	76881312	chr14	76880404
chr14	83350150	83357952	0.213955304577676	-0.134667774925472	0.705882352941177	0.430555555555555	0.724076864166584	0.800801161249352	95	1.15934894574157e-10	*	*	*	InterGenic	*	*	*	*	*	*	*	*	*	*	*	*	*	0	0	*	*	*	*	*	0	0	chr14-83357045:83357210	chr14	83357045	83357210	chr14	83357045	83357210	RFX1	chr14	83356091	83356491	chr14	83356091
chr14	91758106	91761100	0.224358974358975	-0.443438815269258	0.894736842105263	0.666666666666667	0.385593216482346	0.81415052929301	76	2.51786666789955e-20	chr14	91757429	91760516	Intron23	-	CCDC88C	protein_coding	chr14	91758106	91760516	0.804943219772879	0.780693229672822	*	*	*	*	*	0	0	chr14:91759632-91759894	chr14	91759632	91759894	chr14	91759632	91759894	chr14-91760505:91760655	chr14	91760505	91760655	chr14	91760505	91760516	POLR2A,PCBP1,CTCF	chr14	91759466	91760259	chr14	91759466
chr14	91758106	91761100	0.224358974358975	-0.443438815269258	0.894736842105263	0.666666666666667	0.385593216482346	0.81415052929301	76	2.51786666789955e-20	chr14	91760517	91760662	Exon23	-	CCDC88C	protein_coding	chr14	91760517	91760662	0.0484301937207749	1	*	*	*	*	*	0	0	*	*	*	*	*	0	0	chr14-91760505:91760655	chr14	91760505	91760655	chr14	91760517	91760655	*	*	*	*	*	0
chr14	91758106	91761100	0.224358974358975	-0.443438815269258	0.894736842105263	0.666666666666667	0.385593216482346	0.81415052929301	76	2.51786666789955e-20	chr14	91760663	91763648	Intron22	-	CCDC88C	protein_coding	chr14	91760663	91761100	0.145958583834335	0.146398659966499	*	*	*	*	*	0	0	*	*	*	*	*	0	0	*	*	*	*	*	0	0	*	*	*	*	*	0
chr14	102702044	102714009	0.237747035573122	-0.378586703864195	0.8775	0.628540305010894	0.490404185457769	0.885372846791157	181	2.77368407278124e-35	chr14	102700127	102717148	Intron7	-	MOK	protein_coding	chr14	102702044	102714009	1	0.702955173021562	*	*	*	*	*	0	0	*	*	*	*	*	0	0	chr14-102713800:102713950	chr14	102713800	102713950	chr14	102713800	102713950	CEBPB	chr14	102712929	102713219	chr14	102712929
chr14	104679385	104685939	0.25	-0.177395018401591	0.764705882352941	0.476190476190476	0.61412366439237	0.821689820605279	148	1.13957903230061e-18	*	*	*	InterGenic	*	*	*	*	*	*	*	*	*	*	*	*	*	0	0	*	*	*	*	*	0	0	chr14-104685125:104685675	chr14	104685125	104685675	chr14	104685125	104685675	SMARCA4,EZH2,CREB1,FOXA2,FOXA1,POLR2G,MEIS2,MGA	chr14	104685824	104687558	chr14	104685824
chr14	105267863	105281376	0.216577540106952	-0.335175357926215	0.863636363636364	0.612903225806452	0.519646177450092	0.852066110936698	300	5.7747785513884e-50	chr14	105267250	105271049	FirstExon	+	ZBTB42	protein_coding	chr14	105267863	105271049	0.235772959372456	0.838641747828376	CpG: 25	chr14	105268485	105268763	chr14	105268485	105268763	*	*	*	*	*	0	0	chr14-105270980:105271130	chr14	105270980	105271130	chr14	105270980	105271049	CTCF,RBFOX2,AGO2,TAF15,ZFX,POLR2A,ESR1,RFX1,FOS,POLR2G,HNRNPL,ZBTB33,ZNF687,ARID1B,SPI1,POLR2G,YY1,MAX,AGO2,KDM5B,TAF15,RBFOX2,ZFX,POLR2G,MNT,ARID1B,SP1,ZBTB7A,EGR1,MYC,SMARCA4,C11orf30,HDAC2,NFIC,MAX,ZNF316,KDM1A,FOSL2,IKZF1,RFX1,NR3C1,REST,HNRNPL,BMI1,ATF3,JUND,MAFK,JUN,CTBP1,DPF2,MEF2A,FOS,HNRNPLL,FOSL1,RAD21,MTA1,RBM39,NFE2,RFX5,BCOR,POLR2A,CREB1,EGR1	chr14	105269547	105273023	chr14	105269547
chr14	105322158	105330844	0.287239642078352	-0.308780121198354	0.833333333333333	0.541739130434783	0.597768383020924	0.909921448965038	163	2.34152759341745e-35	chr14	105324129	105325173	FirstExon	-	CTD-3051D23.4	lincRNA	chr14	105324129	105325173	0.120193414690306	1	*	*	*	*	*	0	0	*	*	*	*	*	0	0	*	*	*	*	*	0	0	CTBP1,HES1,GATAD2B,LCORL,ZNF512B,HES1,KDM1A,PLRG1,E4F1,HDAC1,TBX3,NCOA3,CTBP1,HDAC2,CTCF,SUZ12,ZNF207,RFX1,ZNF687,BMI1	chr14	105325090	105326844	chr14	105325090
chr14	105322158	105330844	0.287239642078352	-0.308780121198354	0.833333333333333	0.541739130434783	0.597768383020924	0.909921448965038	163	2.34152759341745e-35	chr14	105325174	105326174	Promoter	-	CTD-3051D23.4	lincRNA	chr14	105325174	105326174	0.115127791848952	1	*	*	*	*	*	0	0	*	*	*	*	*	0	0	*	*	*	*	*	0	0	CTBP1,HES1,GATAD2B,LCORL,ZNF512B,HES1,KDM1A,PLRG1,E4F1,HDAC1,TBX3,NCOA3,CTBP1,HDAC2,CTCF,SUZ12,ZNF207,RFX1,ZNF687,BMI1	chr14	105325090	105326844	chr14	105325174
[truncated: 952 more rows]
[truncated: 1 more columns]

## Sheet: README
The table reports DMRs identified in sample T48 vs sample T0. For each DMR we report all the fields of the annotated PoreMeth2 output as documented on GitHub (https://github.com/Lab-CoMBINE/PoreMeth2).
