# Supplementary material for: PoreMeth2 for decoding the evolution of methylome alterations with nanopore sequencing
Source: HighWire-hosted journal article supplement (doi:10.1101/gr.280259.124), 2025-10-20
Supplement: Supplemental_Table_6.xlsx [file Supplemental_Table_6.xlsx]

## Sheet: DEGs_T48_vs_T0
symbol	baseMean	log2FoldChange	lfcSE	stat	pvalue	padj
DDX11L1	68.2014	-1.09285	0.295733	-3.69541	0.000219529	0.000749427
WASH7P	115.542	-0.820141	0.225096	-3.64352	0.000268931	0.000905933
RP11-34P13.7	9.3739	-1.53408	0.616786	-2.48721	0.0128749	0.0304375
RP11-34P13.8	7.27645	-2.29365	0.762418	-3.00839	0.00262634	0.00731452
CICP27	4.98379	-1.8085	0.779423	-2.32031	0.0203239	0.0453956
AL627309.1	24.5103	-1.76835	0.441009	-4.00979	6.07724e-05	0.000225029
RP11-34P13.15	15.9095	-2.53928	0.557629	-4.5537	5.27094e-06	2.27314e-05
AP006222.2	179.387	1.26998	0.21848	5.81279	6.14398e-09	3.65921e-08
AP006222.1	166.978	1.42013	0.224762	6.31839	2.64301e-10	1.80834e-09
RP4-669L17.10	48.3908	-1.49225	0.356069	-4.19091	2.77836e-05	0.000108085
RP4-669L17.8	27.5368	-1.89879	0.483806	-3.92469	8.68432e-05	0.000314132
MTND1P23	1314.44	-1.62178	0.287737	-5.63631	1.73729e-08	9.88025e-08
MTND2P28	4655.55	-2.13359	0.275026	-7.75777	8.64346e-15	8.71356e-14
hsa-mir-6723	10357	-2.09621	0.291079	-7.20151	5.95483e-13	5.15497e-12
RP5-857K21.7	16495.8	-1.99762	0.364392	-5.48205	4.20414e-08	2.29597e-07
MTATP6P1	7117.27	-1.29734	0.595002	-2.1804	0.0292276	0.0621231
RP5-857K21.11	6193.52	-1.31734	0.570768	-2.30802	0.0209981	0.0467246
RP11-206L10.1	22.1248	-1.63208	0.468124	-3.48642	0.000489528	0.00157648
RP11-206L10.3	11.2956	-1.46316	0.539672	-2.7112	0.00670392	0.017078
RP11-206L10.8	27.6836	2.6332	0.459328	5.73272	9.88322e-09	5.7724e-08
RP11-206L10.10	15.1852	1.47601	0.557316	2.64843	0.00808668	0.0201771
LINC00115	13.9299	-1.29076	0.50512	-2.55536	0.0106078	0.0256569
LINC01128	117.049	0.563677	0.236233	2.3861	0.017028	0.0388794
RP11-54O7.3	7.18332	-1.99021	0.801906	-2.48185	0.0130704	0.0308424
SAMD11	74.6211	-1.05775	0.430453	-2.45729	0.0139988	0.0327517
NOC2L	85.3569	-1.15155	0.427755	-2.69207	0.00710099	0.0179907
RP11-54O7.10	7.04563	-1.86089	0.660196	-2.81869	0.00482198	0.0127165
B3GALT6	40.7112	-1.10635	0.438462	-2.52325	0.0116276	0.027828
RP5-890O3.9	17.7747	-1.23076	0.615931	-1.99821	0.0456944	0.090798
RP4-758J18.2	2303.07	-1.18688	0.141483	-8.38881	4.91078e-17	6.00929e-16
SSU72	709.391	0.786905	0.170431	4.61715	3.89043e-06	1.70524e-05
C1orf233	23.6906	-1.23765	0.472756	-2.61795	0.00884608	0.0218204
MMP23B	8.14373	-1.52554	0.724596	-2.10537	0.0352591	0.07286
RP11-345P4.7	1.52311	-3.89514	1.79868	-2.16556	0.0303451	0.0640818
RP11-345P4.6	3.64638	-4.42463	1.4973	-2.95506	0.00312608	0.00859481
SLC35E2	28.1937	0.819332	0.385407	2.12589	0.0335128	0.0698066
GNB1	265.947	-0.838681	0.374228	-2.2411	0.0250198	0.0544563
SKI	44.1573	-1.36979	0.372933	-3.67303	0.000239689	0.000813972
RER1	541.105	1.2986	0.155936	8.32775	8.23913e-17	9.90487e-16
PEX10	18.2267	-1.26719	0.502103	-2.52377	0.0116105	0.0277923
PRDM16	5.83387	-1.81348	0.794943	-2.28127	0.0225327	0.0497052
WRAP73	85.9569	1.38735	0.277643	4.99687	5.82684e-07	2.81838e-06
DFFB	59.698	0.791112	0.277358	2.85231	0.00434027	0.0115778
C1orf174	298.586	0.611254	0.22969	2.66121	0.0077861	0.0195265
RPL22	11021.1	-3.87946	0.156824	-24.7376	4.21237e-135	7.24723e-133
RNF207	115.504	-2.03739	0.410111	-4.9679	6.76806e-07	3.23808e-06
ICMT	152.171	-1.16161	0.412634	-2.81512	0.00487592	0.0128418
NOL9	74.3516	-1.07752	0.34689	-3.10622	0.00189497	0.00542771
KLHL21	26.7401	-1.77288	0.43013	-4.12173	3.76036e-05	0.000143472
DNAJC11	264.491	1.8697	0.220845	8.46613	2.53689e-17	3.17925e-16
snoU13	138.66	-0.745727	0.203059	-3.67247	0.000240221	0.000815671
CAMTA1	1544.4	0.984904	0.168973	5.82878	5.58347e-09	3.34147e-08
VAMP3	451.196	0.9069	0.191597	4.73336	2.2083e-06	9.9617e-06
ERRFI1	13.2925	-1.21595	0.574643	-2.116	0.0343446	0.0712594
RERE	59.057	-0.947378	0.45628	-2.07631	0.0378654	0.0774327
RPL7P11	8.55807	-1.87964	0.661906	-2.83974	0.00451509	0.0119899
RPL7P7	8.28427	-6.39335	1.18656	-5.38813	7.11952e-08	3.79557e-07
RP4-633I8.3	4.64766	-4.79912	1.25107	-3.836	0.000125055	0.000442196
RP11-185B14.1	5.05425	-3.88321	1.01375	-3.83052	0.000127871	0.000451597
ENO1	10525	-0.552255	0.15034	-3.67337	0.00023937	0.000812996
HMGN2P17	325.8	-1.63768	0.170924	-9.58133	9.58035e-22	1.67827e-20
TMEM201	22.3299	-1.88153	0.514001	-3.66057	0.000251659	0.000851393
PIK3CD	58.5648	-1.21337	0.46749	-2.59549	0.00944564	0.0231504
RP11-558F24.4	185.452	0.575087	0.246865	2.32956	0.0198296	0.0444442
CLSTN1	66.8773	-0.994846	0.463923	-2.14442	0.0319991	0.0670245
RP11-558F24.6	4.18308	4.16028	1.28421	3.23957	0.00119708	0.00357872
CTNNBIP1	27.8077	-1.25478	0.401409	-3.12593	0.00177243	0.00510885
RP11-84A14.5	23.755	-1.61633	0.468098	-3.45297	0.000554447	0.00176736
LZIC	371.719	1.63473	0.226654	7.21247	5.49459e-13	4.77245e-12
UBE4B	137.248	1.66996	0.268624	6.21671	5.07676e-10	3.38524e-09
PGD	485.992	-1.70602	0.219583	-7.76936	7.88824e-15	7.98942e-14
RP4-736L20.3	133.393	-1.09146	0.210862	-5.17616	2.26503e-07	1.14793e-06
APITD1	314.93	0.727503	0.194166	3.74682	0.000179092	0.000620682
APITD1-CORT	307.169	0.752717	0.199424	3.77445	0.000160359	0.000558664
DFFA	803.951	1.00549	0.183768	5.47149	4.46271e-08	2.42952e-07
CASZ1	3.85847	-1.87286	0.951379	-1.96858	0.0490018	0.0964333
RP4-635E18.8	7.77267	-1.96024	0.666427	-2.94141	0.00326719	0.00894209
SRM	112.787	-1.10796	0.44014	-2.5173	0.0118259	0.0282532
EXOSC10	1101.64	2.83635	0.229461	12.361	4.25097e-35	1.49238e-33
RP4-635E18.7	245.87	0.577443	0.230162	2.50885	0.0121124	0.0288633
UBE2V2P3	7.02814	4.92784	1.175	4.19391	2.74188e-05	0.000106746
FBXO44	78.1107	0.89778	0.2509	3.57824	0.000345915	0.00114466
FBXO6	64.382	1.10011	0.409466	2.68669	0.00721634	0.0182456
MAD2L2	384.512	1.18738	0.184107	6.44939	1.12305e-10	7.99113e-10
AGTRAP	805.627	1.4445	0.207939	6.94676	3.73766e-12	3.042e-11
CLCN6	39.3504	1.5879	0.342587	4.63502	3.56906e-06	1.571e-05
RNU5E-1	1.70153	3.64324	1.55366	2.34494	0.0190301	0.0428929
KIAA2013	59.4208	-1.22041	0.429636	-2.84056	0.00450338	0.0119613
PLOD1	771.423	3.29246	0.221241	14.8817	4.33025e-50	2.16755e-48
RP5-1077B9.5	12.1301	6.4748	1.16629	5.55164	2.83004e-08	1.57333e-07
MIIP	17.7632	-0.892889	0.422825	-2.11172	0.0347103	0.0718945
RP11-426M1.2	2.00225	-5.0801	1.56953	-3.2367	0.0012092	0.0036116
SNORA70	192.972	-1.59299	0.243955	-6.52988	6.58233e-11	4.77794e-10
DHRS3	36.8711	0.813971	0.357895	2.27433	0.0229463	0.0505088
PDPN	246.826	0.989135	0.209715	4.71656	2.39862e-06	1.07809e-05
KAZN	12.5312	-1.37432	0.623554	-2.204	0.0275242	0.0590171
RP1-21O18.3	1.89492	3.81201	1.60057	2.38166	0.017235	0.0392934
FHAD1	6.23833	2.19895	0.96339	2.28251	0.0224594	0.0495602
CASP9	105.234	1.48859	0.324214	4.59138	4.40328e-06	1.91741e-05
DNAJC16	71.1397	1.18218	0.288168	4.10241	4.08862e-05	0.000155154
DDI2	50.2289	-0.87321	0.360999	-2.41887	0.0155688	0.0359138
PLEKHM2	20.0892	-1.58284	0.479164	-3.30334	0.000955392	0.0029135
RP11-169K16.7	12929.2	-0.832919	0.155729	-5.34852	8.86771e-08	4.6824e-07
RP11-169K16.8	11787.6	3.88995	0.174534	22.2876	4.8713e-110	5.94138e-108
RP11-169K16.9	91.8136	-1.04396	0.243482	-4.28765	1.80576e-05	7.22497e-05
SPEN	214.107	-0.631531	0.240355	-2.6275	0.00860155	0.021292
MT1XP1	285.785	1.88556	0.20294	9.29125	1.52491e-20	2.42298e-19
FBXO42	114.555	1.81843	0.361478	5.03055	4.89079e-07	2.38606e-06
RP11-430L17.1	68.9547	4.16058	0.443046	9.39084	5.95251e-21	9.79355e-20
NECAP2	279.92	1.24746	0.197411	6.31913	2.63037e-10	1.80064e-09
CROCCP3	4.26065	-2.69835	0.970844	-2.77939	0.00544616	0.0141713
RNU1-1	134.79	-2.53463	0.398059	-6.36747	1.92176e-10	1.33419e-09
RP4-798A10.7	22.5408	-1.54565	0.445847	-3.46676	0.000526771	0.00168659
RNU1-3	147.322	-2.74657	0.363067	-7.56489	3.88187e-14	3.72266e-13
EIF1AXP1	611.189	-1.26355	0.211191	-5.98298	2.19094e-09	1.36659e-08
RNU1-4	146.182	-2.67857	0.389585	-6.87545	6.17961e-12	4.92908e-11
CROCCP4	15.2776	-1.36414	0.496563	-2.74716	0.00601133	0.0154653
RNU1-2	147.359	-2.72023	0.388099	-7.0091	2.39855e-12	1.97878e-11
RP11-108M9.6	3.10121	-2.82063	1.10827	-2.54508	0.0109253	0.0263537
MFAP2	38.3299	1.51528	0.364108	4.16163	3.15988e-05	0.000121832
SDHB	4341.35	2.07909	0.200107	10.3899	2.7572e-25	5.97409e-24
RP1-20B21.4	308.416	-1.0526	0.316793	-3.32268	0.000891579	0.00273237
RCC2	356.948	-0.768695	0.269534	-2.85194	0.00434537	0.011589
ARHGEF10L	4.79307	-2.25931	1.01761	-2.22022	0.0264037	0.0570051
RP1-8B22.1	143.316	10.0421	1.04222	9.63529	5.67318e-22	1.00878e-20
RP13-279N23.2	10.9952	1.57764	0.611474	2.58006	0.00987841	0.0240674
ALDH4A1	13.4908	1.13556	0.573267	1.98086	0.0476066	0.0940194
IFFO2	10.1726	-1.42644	0.635953	-2.24299	0.0248972	0.0542348
RP5-1126H10.2	51.2909	-1.67077	0.389505	-4.28947	1.791e-05	7.17255e-05
UBR4	141.531	0.72328	0.261037	2.7708	0.00559191	0.0144968
EMC1	554.461	2.07584	0.241528	8.59462	8.3542e-18	1.09117e-16
AKR7A2	63.8628	-0.957188	0.476173	-2.01017	0.0444135	0.0887006
CAPZB	969.426	2.23728	0.184202	12.1458	6.03715e-34	2.02897e-32
MINOS1-NBL1	2335.4	-2.09468	0.127865	-16.382	2.5704e-60	1.53157e-58
MINOS1	2353.96	-2.08576	0.12561	-16.6051	6.40005e-62	3.93066e-60
RPS14P3	42612.3	-0.592567	0.16607	-3.56819	0.000359462	0.00118674
NBL1	14.2634	-1.45944	0.559576	-2.60812	0.00910417	0.0223742
OTUD3	16.0362	-1.66191	0.523741	-3.17314	0.00150799	0.00441121
CAMK2N1	19	-0.977225	0.480291	-2.03465	0.0418859	0.0844643
MUL1	86.6454	0.755172	0.277096	2.7253	0.00642422	0.0164218
CDA	98.261	1.27829	0.431357	2.96341	0.00304254	0.00838288
PINK1-AS	1184.17	-0.812086	0.129881	-6.25256	4.0379e-10	2.71552e-09
AL391357.1	43.8925	-0.878631	0.354706	-2.47707	0.0132465	0.0311911
DDOST	1878.97	0.606945	0.194103	3.12692	0.00176651	0.00509686
SH2D5	6.81742	-1.68338	0.802938	-2.09652	0.0360361	0.0742942
HP1BP3	334.331	1.37807	0.215248	6.40226	1.5309e-10	1.07345e-09
RP5-930J4.4	93.4027	-0.578251	0.259135	-2.23147	0.0256503	0.0556466
EIF4G3	337.331	1.50729	0.168222	8.96009	3.24425e-19	4.69539e-18
RP11-487E1.2	2.2697	-2.68824	1.33936	-2.0071	0.0447385	0.0892674
ECE1	40.6897	0.873934	0.356054	2.4545	0.014108	0.0329798
PPP1R11P1	5.42231	5.32441	1.25003	4.25943	2.04953e-05	8.1327e-05
USP48	144.025	1.63009	0.217261	7.50292	6.24128e-14	5.88325e-13
LINC00339	160.472	0.537836	0.226237	2.37731	0.0174396	0.0397041
CDC42	1308.01	-1.94811	0.133177	-14.6279	1.86408e-48	9.0013e-47
RP1-224A6.8	12.7756	6.55508	1.1227	5.8387	5.26089e-09	3.15787e-08
RP5-1057J7.1	9.50729	1.86896	0.672185	2.78043	0.00542877	0.0141288
TCEA3	16.4969	2.45727	0.616484	3.98593	6.7215e-05	0.000247124
RP4-654C18.1	286.41	11.0409	1.04098	10.6063	2.78557e-26	6.43255e-25
RPL11	19751.8	-0.970808	0.151374	-6.41331	1.42393e-10	1.00169e-09
TCEB3	344.251	0.639343	0.19676	3.24935	0.00115668	0.0034688
RP5-886K2.3	99.9891	0.692632	0.224909	3.07961	0.00207273	0.0058927
HMGCL	239.358	2.74084	0.346315	7.91431	2.48622e-15	2.62133e-14
FUCA1	125.464	1.53772	0.230101	6.68281	2.34399e-11	1.77483e-10
PNRC2	693.659	-0.897158	0.179611	-4.99501	5.88335e-07	2.84254e-06
RP11-4M23.7	556.732	4.12485	0.216226	19.0766	3.95144e-81	3.29021e-79
STPG1	212.509	1.03644	0.249525	4.15364	3.27228e-05	0.000125904
NIPAL3	613.477	2.88141	0.216906	13.2841	2.86223e-40	1.18973e-38
SRRM1	473.8	-1.27354	0.216228	-5.8898	3.86658e-09	2.35136e-08
SYF2	602.49	1.71347	0.254501	6.73265	1.66596e-11	1.28085e-10
SDHDP6	887.659	-0.829973	0.219353	-3.78373	0.000154495	0.000539974
TMEM50A	1264.17	1.68238	0.186545	9.01861	1.9049e-19	2.80859e-18
RHCE	113.467	-0.631075	0.220131	-2.86681	0.00414631	0.0110945
RP3-469D22.1	840.24	-0.710149	0.222705	-3.18874	0.00142892	0.0041998
TMEM57	64.6735	1.02651	0.290958	3.52804	0.000418643	0.00136615
LDLRAP1	45.7996	1.41276	0.397177	3.55701	0.000375102	0.00123414
SEPN1	99.4518	-1.22379	0.275211	-4.44675	8.71802e-06	3.6524e-05
RP1-317E23.3	51.1858	-1.12589	0.310099	-3.63073	0.000282625	0.000948251
MTFR1L	300.05	1.1336	0.239998	4.72337	2.31967e-06	1.04459e-05
AL020996.1	71.3959	-1.50728	0.307799	-4.89696	9.73323e-07	4.58162e-06
RP1-317E23.7	123.287	-0.603892	0.258885	-2.33266	0.0196658	0.0441305
SNRPFP2	82.0502	8.51309	1.04394	8.15475	3.499e-16	3.98512e-15
MIR3917	1135.31	-6.16685	0.21681	-28.4436	5.85321e-178	1.87729e-175
PAFAH2	48.8126	1.80347	0.399937	4.5094	6.50124e-06	2.76878e-05
ZNF593	470.454	-0.680438	0.163097	-4.17198	3.01961e-05	0.000116823
RP11-96L14.7	470.379	-0.681036	0.163157	-4.17411	2.99153e-05	0.000115874
CEP85	183.056	1.87239	0.285328	6.56223	5.30086e-11	3.87809e-10
AIM1L	23.2227	4.30793	0.783447	5.49869	3.8263e-08	2.09933e-07
DHDDS	217.675	2.1485	0.276901	7.75909	8.55429e-15	8.62701e-14
HMGN2	8256.65	-1.80371	0.136409	-13.2228	6.47944e-40	2.65923e-38
PIGV	40.3237	1.10692	0.35884	3.08473	0.00203739	0.00580048
ZDHHC18	35.3908	-1.73912	0.388835	-4.47263	7.72648e-06	3.25643e-05
GPN2	92.2424	0.756483	0.240794	3.14162	0.00168017	0.00486775
NUDC	404.787	-1.2424	0.277211	-4.48177	7.40273e-06	3.13115e-05
RP11-344H11.4	25.3139	1.59292	0.659793	2.41427	0.0157666	0.036325
OSTCP2	279.562	11.0061	1.04294	10.553	4.92087e-26	1.11846e-24
NPM1P39	2915.89	-2.65293	0.199223	-13.3164	1.85945e-40	7.76635e-39
WDTC1	27.545	0.827646	0.376817	2.19642	0.0280622	0.0599677
TMEM222	370.239	0.658029	0.199278	3.30207	0.000959742	0.00292539
RP1-144C9.2	1.25266	-4.40738	1.98076	-2.2251	0.0260748	0.0564027
WASF2	71.8021	-1.11187	0.286572	-3.8799	0.000104498	0.000374139
RP1-159A19.3	3563.29	-1.45138	0.141027	-10.2915	7.69622e-25	1.61764e-23
IFI6	130.461	1.45442	0.25561	5.68999	1.27045e-08	7.33447e-08
FAM76A	59.493	1.00264	0.305879	3.27789	0.00104585	0.00316447
RP3-426I6.2	254.662	8.4281	0.743746	11.332	9.11458e-30	2.5571e-28
STX12	319.517	1.92691	0.267016	7.21646	5.33589e-13	4.63926e-12
PPP1R8	198.357	-0.557779	0.171671	-3.24913	0.0011576	0.00347065
AL109927.1	118.829	-0.636301	0.228334	-2.78671	0.00532464	0.0138898
SMPDL3B	226.051	2.21865	0.323058	6.86765	6.52666e-12	5.19791e-11
EYA3	213.974	1.68393	0.240252	7.00902	2.39993e-12	1.9793e-11
SPCS2P4	1649.45	-0.778962	0.154848	-5.03048	4.89245e-07	2.38642e-06
RP5-1053E7.3	36.3319	6.60089	1.05946	6.23041	4.65221e-10	3.11414e-09
DNAJC8	1549.51	-0.831435	0.18756	-4.4329	9.29749e-06	3.88071e-05
AL353354.1	1342.68	-0.786457	0.189553	-4.149	3.33936e-05	0.00012839
AL353354.2	1461.67	-0.903271	0.187608	-4.81468	1.47437e-06	6.80333e-06
RP5-1092A3.5	13.2483	-1.54792	0.632363	-2.44783	0.0143718	0.0335006
PHACTR4	172.543	1.17829	0.218138	5.40156	6.60632e-08	3.53067e-07
RP1-308E4.1	18.4323	4.25574	0.792972	5.36683	8.01339e-08	4.24943e-07
SNHG3	705.95	-0.700946	0.218906	-3.20204	0.00136459	0.00402987
PRDX3P2	465.012	8.97505	0.691959	12.9705	1.79852e-38	7.07937e-37
TRNAU1AP	1020.58	1.40406	0.221332	6.34366	2.24373e-10	1.54738e-09
TAF12	700.964	1.68013	0.188653	8.90594	5.29362e-19	7.55621e-18
GMEB1	160.876	1.84976	0.340978	5.42486	5.79989e-08	3.11635e-07
EPB41	195.808	1.44965	0.285765	5.07287	3.91852e-07	1.93058e-06
RP4-604A21.1	1182.52	4.75154	0.200993	23.6403	1.48521e-123	2.10843e-121
TMEM200B	37.3108	-1.64317	0.441388	-3.72273	0.000197083	0.000679048
MECR	645.694	2.16727	0.239652	9.04341	1.51862e-19	2.25312e-18
PTPRU	32.3469	-1.41159	0.500346	-2.82123	0.00478397	0.0126304
PUM1	355.669	1.49803	0.221345	6.76783	1.30726e-11	1.01559e-10
SEPW1P	7.99293	5.87258	1.17887	4.98155	6.30777e-07	3.02957e-06
SNRNP40	402.142	-2.29139	0.283083	-8.09442	5.75367e-16	6.41797e-15
RP11-490K7.4	43.4483	8.31902	1.06458	7.81438	5.52342e-15	5.67839e-14
ZCCHC17	1075.35	1.44204	0.194473	7.41513	1.21503e-13	1.11736e-12
SERINC2	16.6986	1.57945	0.559945	2.82072	0.00479165	0.0126481
HCRTR1	291.519	-1.41202	0.256169	-5.51205	3.54669e-08	1.95252e-07
PEF1	771.175	0.558539	0.195811	2.85244	0.00433856	0.0115744
RP11-73M7.6	202.327	-3.82129	0.258017	-14.8102	1.25897e-49	6.20622e-48
RP11-73M7.9	199.646	-3.90279	0.270645	-14.4203	3.85516e-47	1.81109e-45
PTP4A2	254.064	-1.27346	0.39496	-3.22427	0.00126294	0.0037557
TMEM39B	172.483	1.36336	0.213108	6.39754	1.57904e-10	1.10512e-09
KPNA6	259.059	0.649037	0.210341	3.08564	0.00203116	0.00578528
RP4-622L5.2	123.984	-1.30873	0.284981	-4.59234	4.38295e-06	1.9092e-05
TXLNA	77.0624	-1.30887	0.295683	-4.42659	9.57341e-06	3.98826e-05
CCDC28B	1005.71	0.952488	0.189822	5.0178	5.22654e-07	2.54318e-06
RP4-622L5.7	433.252	-2.0676	0.146623	-14.1015	3.71666e-45	1.69693e-43
TMEM234	108.787	0.631279	0.235307	2.68279	0.00730114	0.0184384
EIF3I	5282.82	0.773176	0.187385	4.12614	3.68897e-05	0.000140976
HDAC1	2237.57	1.59262	0.206361	7.71766	1.18486e-14	1.18129e-13
MARCKSL1	689.167	-1.37248	0.290996	-4.71649	2.39945e-06	1.07819e-05
BSDC1	239.95	1.65072	0.208363	7.92235	2.33061e-15	2.46526e-14
RP11-395N6.4	1.64551	3.60252	1.57557	2.28648	0.022226	0.0491036
RP1-27O5.3	77.1106	0.610332	0.243608	2.50538	0.0122319	0.029108
ZBTB8OS	663.271	-1.49703	0.159939	-9.36002	7.97239e-21	1.29609e-19
RBBP4	772.815	-2.4671	0.245805	-10.0368	1.05043e-23	2.09593e-22
SYNC	618.312	-2.57391	0.284776	-9.03837	1.59025e-19	2.3567e-18
KIAA1522	42.1608	-1.49027	0.350506	-4.25177	2.12088e-05	8.39529e-05
YARS	1560.63	2.31461	0.211716	10.9326	8.05274e-28	2.03109e-26
S100PBP	231.96	1.36002	0.219732	6.18942	6.03866e-10	3.9969e-09
RP1-117O3.2	14.0475	-3.11522	0.605132	-5.148	2.63281e-07	1.32349e-06
AK2	1944.81	-0.794176	0.144472	-5.49708	3.86125e-08	2.11672e-07
ADC	38.383	3.29089	0.623431	5.27868	1.30119e-07	6.76477e-07
ZNF362	19.9176	-1.15547	0.485867	-2.37816	0.0173994	0.0396229
AL513327.1	17.753	-1.39108	0.557168	-2.4967	0.0125356	0.0297219
PHC2	81.3202	-1.12676	0.298203	-3.7785	0.000157776	0.000550625
RP4-580O19.2	714.95	12.3612	1.03986	11.8873	1.37776e-32	4.41887e-31
RP11-244H3.1	334.411	-0.60658	0.221494	-2.73859	0.00617031	0.0158304
ZMYM6NB	648.842	0.947382	0.213404	4.43939	9.02163e-06	3.77169e-05
ZMYM1	110.3	1.09024	0.277776	3.92489	8.67696e-05	0.00031391
EFCAB14P1	4.00066	2.64197	1.12033	2.3582	0.0183639	0.041542
ZMYM4	214.829	0.632211	0.175183	3.60887	0.000307538	0.00102562
SNORA62	18.2993	-0.88082	0.448591	-1.96353	0.049585	0.0973893
RPL5P4	1210.76	3.66783	0.181405	20.219	6.66751e-91	6.36821e-89
ZMYM4-AS1	15.4048	-1.15919	0.506513	-2.28858	0.0221039	0.0488755
KIAA0319L	237.787	1.49726	0.249083	6.0111	1.84269e-09	1.15995e-08
NCDN	58.7288	-0.981899	0.372716	-2.63444	0.00842758	0.0209092
PSMB2	8212.92	1.61732	0.173143	9.34097	9.54574e-21	1.54414e-19
CLSPN	85.152	0.738984	0.296774	2.49005	0.0127724	0.0302116
AGO1	132.517	-0.639663	0.297506	-2.15008	0.0315488	0.0662094
AGO3	71.6493	0.708463	0.306786	2.3093	0.0209267	0.0465817
TEKT2	22.1389	-1.68942	0.399777	-4.2259	2.37989e-05	9.35356e-05
ADPRHL2	138.212	0.590489	0.204643	2.88547	0.00390833	0.0105163
TRAPPC3	873.677	0.714272	0.147516	4.842	1.28539e-06	5.96837e-06
MAP7D1	75.5255	-1.0264	0.429701	-2.38864	0.0169107	0.0386524
OSCP1	109.431	1.23228	0.246752	4.994	5.9142e-07	2.85639e-06
SNORA63	16.1938	-1.68255	0.460525	-3.65355	0.000258636	0.000872893
MRPS15	2494.77	1.03929	0.165206	6.29084	3.15752e-10	2.1468e-09
MEAF6	912.014	1.28409	0.206383	6.22189	4.91201e-10	3.27938e-09
FTH1P1	13.1091	-2.01432	0.734753	-2.74149	0.00611611	0.0157053
RP3-423B22.5	6333.74	-2.06595	0.159833	-12.9257	3.22289e-38	1.26096e-36
DNALI1	354.487	-3.05398	0.379357	-8.05042	8.25099e-16	9.08659e-15
RSPO1	10.4152	4.77127	1.1786	4.04825	5.16017e-05	0.00019297
C1orf109	176.682	0.680839	0.259997	2.61864	0.00882807	0.0217822
CDCA8	702.251	1.88688	0.212353	8.88559	6.35833e-19	9.0264e-18
MANEAL	39.0541	-1.27596	0.390062	-3.27118	0.00107098	0.00323373
RP11-109P14.9	29.4676	-1.79215	0.445366	-4.02399	5.72195e-05	0.000212571
YRDC	92.3579	-1.13313	0.443797	-2.55327	0.0106716	0.0257944
C1orf122	146.152	-0.753424	0.267779	-2.8136	0.00489902	0.0128974
RP11-109P14.10	39.8213	-0.854167	0.332043	-2.57246	0.0100978	0.0245514
INPP5B	235.775	2.40336	0.284502	8.4476	2.97346e-17	3.69959e-16
SF3A3	636.253	-2.01947	0.16869	-11.9715	5.01308e-33	1.62997e-31
UTP11L	2216.27	1.14851	0.16608	6.91539	4.66588e-12	3.7656e-11
RP5-884C9.3	23.5467	7.43315	1.11327	6.67684	2.44147e-11	1.84595e-10
RP11-334L9.1	20.5111	-1.08861	0.511387	-2.12874	0.0332756	0.0693904
RRAGC	58.2294	-0.95741	0.485956	-1.97016	0.0488203	0.0961709
AKIRIN1	152.22	-1.18504	0.345494	-3.43	0.000603581	0.00190876
HSPE1P8	22.2529	-2.81844	0.432867	-6.51109	7.46092e-11	5.39458e-10
BMP8A	19.705	1.07401	0.483555	2.22108	0.0263455	0.0568889
RP11-69E11.4	32.3659	1.46396	0.447251	3.27325	0.0010632	0.00321284
PABPC4	513.541	-0.62265	0.278058	-2.23928	0.0251376	0.0546713
RP11-69E11.8	129.476	-2.96454	0.236069	-12.558	3.59461e-36	1.31713e-34
PPIE	2691.58	2.11836	0.207849	10.1918	2.15659e-24	4.43946e-23
RP1-144F13.4	48.4029	4.66953	0.575145	8.11888	4.70498e-16	5.29137e-15
BMP8B	76.0871	-0.910905	0.301688	-3.01936	0.00253312	0.00707992
TRIT1	402.363	1.99202	0.244293	8.15419	3.5153e-16	4.00193e-15
PPT1	2424.17	2.10878	0.223539	9.43358	3.96321e-21	6.62124e-20
RP11-115D7.3	16.2744	6.90447	1.09924	6.28116	3.36052e-10	2.27767e-09
RP1-39G22.7	118.041	-0.995791	0.258869	-3.84669	0.000119723	0.000424959
ZMPSTE24	670.05	2.04558	0.226138	9.0457	1.48708e-19	2.2076e-18
RP1-39G22.4	22.4312	4.04519	0.675392	5.98939	2.1063e-09	1.31632e-08
COL9A2	7.53973	-1.71372	0.745067	-2.30009	0.0214429	0.047588
RP1-228H13.1	133.952	1.40851	0.280118	5.02828	4.94902e-07	2.4113e-06
SMAP2	131.632	0.974154	0.238467	4.08507	4.40637e-05	0.000166289
ZFP69B	17.8047	1.7683	0.485965	3.63875	0.000273968	0.000921469
ZFP69	13.1794	-1.60268	0.756906	-2.11741	0.0342254	0.0710404
ZNF684	101.443	0.504559	0.237447	2.12493	0.0335923	0.0699274
NFYC-AS1	52.7888	-2.54579	0.31293	-8.13533	4.10813e-16	4.65642e-15
CTPS1	2037.38	2.40848	0.216527	11.1232	9.67091e-29	2.56892e-27
SCMH1	392.611	1.88864	0.205142	9.20651	3.36911e-20	5.2006e-19
FOXJ3	156.558	1.05011	0.24969	4.20564	2.6034e-05	0.00010172
TMSB4XP1	58.5592	-4.08307	0.360707	-11.3196	1.04925e-29	2.92955e-28
PPIH	686.211	-3.55329	0.197176	-18.0209	1.33603e-72	9.74967e-71
YBX1	2089.23	-1.73547	0.325138	-5.33764	9.41668e-08	4.95724e-07
C1orf50	158.103	0.79129	0.20862	3.79297	0.000148857	0.000521322
ERMAP	247.624	-1.47152	0.245634	-5.9907	2.08937e-09	1.307e-08
RP11-342M1.6	2.00363	3.86592	1.54864	2.49633	0.0125485	0.0297497
ATP6V1E1P1	197.918	6.89016	0.547829	12.5772	2.81811e-36	1.03553e-34
SLC2A1-AS1	19.6766	1.5371	0.582808	2.6374	0.00835437	0.0207573
EBNA1BP2	1747.26	0.938413	0.156923	5.98008	2.23022e-09	1.39009e-08
WDR65	601.534	-0.661417	0.205324	-3.22133	0.00127598	0.00378929
CDC20	432.124	-0.964653	0.201576	-4.78555	1.70517e-06	7.79769e-06
RP1-92O14.6	232.822	-5.47079	0.268536	-20.3726	2.92444e-92	2.86694e-90
SZT2	34.199	-0.95958	0.330881	-2.90008	0.00373071	0.0100843
HYI	29.9267	-0.889828	0.428338	-2.0774	0.037765	0.077276
PTPRF	154.939	-0.990475	0.410792	-2.41114	0.0159029	0.036587
KDM4A	303.206	1.707	0.222257	7.68031	1.5871e-14	1.56475e-13
SHMT1P1	42.5152	6.83697	1.05109	6.50463	7.78861e-11	5.62057e-10
IPO13	84.4817	-0.675673	0.274867	-2.45818	0.0139643	0.0326858
DPH2	138.642	-0.990076	0.210284	-4.70827	2.49824e-06	1.11996e-05
RP11-570P14.1	3714.54	0.642704	0.16667	3.85614	0.00011519	0.00041016
ERI3	2044.99	1.39828	0.175328	7.97524	1.52091e-15	1.63677e-14
TMEM53	155.159	1.0414	0.239146	4.35469	1.33256e-05	5.43635e-05
RNU5F-1	49.7002	2.11775	0.403719	5.2456	1.55772e-07	8.03098e-07
KIF2C	736.594	2.48447	0.21029	11.8145	3.28512e-32	1.03951e-30
RP11-269F19.2	33249	-8.7562	0.194383	-45.0462	0	0
RPS8	43804.5	-5.11809	0.278089	-18.4045	1.20865e-75	9.10129e-74
SNORD38A	37.1237	-0.708168	0.348112	-2.03431	0.0419201	0.0845135
RPS15AP11	22647.2	-2.68824	0.135903	-19.7806	4.37759e-87	3.93514e-85
BEST4	1.86449	-4.20366	1.58739	-2.64816	0.0080932	0.0201914
EIF2B3	1994.33	2.60247	0.202748	12.836	1.03092e-37	3.97955e-36
CCNB1IP1P1	171.903	10.3047	1.06513	9.67466	3.86384e-22	6.95626e-21
MRPS17P1	131.15	5.27112	0.396665	13.2886	2.69607e-40	1.12245e-38
ZSWIM5	20.3857	-1.21962	0.428623	-2.84544	0.004435	0.0118026
OSTCP5	63.7447	7.42145	1.03937	7.14036	9.30853e-13	7.93394e-12
MUTYH	107.701	-1.24772	0.24227	-5.15011	2.60327e-07	1.30965e-06
MMACHC	10781.9	-1.31256	0.161275	-8.13864	3.99748e-16	4.53694e-15
PRDX1	15326.4	-1.23048	0.157823	-7.79659	6.36036e-15	6.50023e-14
AKR1A1	1075.45	0.941753	0.198311	4.74886	2.04566e-06	9.26341e-06
NASP	2379.26	0.72896	0.190153	3.83354	0.000126312	0.000446273
GPBP1L1	557.257	1.85408	0.217054	8.54199	1.31927e-17	1.69419e-16
TMEM69	448.555	0.733624	0.203635	3.60265	0.000314992	0.00104859
RP11-767N6.7	21.252	-1.78198	0.419022	-4.25271	2.11203e-05	8.36497e-05
RP11-630I5.1	67.7109	-1.91688	0.269139	-7.12228	1.06154e-12	9.0006e-12
MAST2	36.1747	-0.835439	0.420853	-1.98511	0.0471325	0.0932633
TMA16P2	68.6988	6.9413	0.873521	7.94635	1.92091e-15	2.04774e-14
RP4-533D7.3	22.1105	5.28712	0.904391	5.84606	5.03354e-09	3.0256e-08
POMGNT1	108.593	-0.715359	0.274617	-2.60493	0.00918926	0.0225577
LURAP1	12.886	1.31648	0.530895	2.47974	0.013148	0.0310012
RAD54L	478.468	0.9767	0.194222	5.02879	4.93576e-07	2.40574e-06
UQCRH	9079.43	-4.36569	0.209453	-20.8433	1.7515e-96	1.82008e-94
NSUN4	223.515	1.17017	0.230039	5.08686	3.64049e-07	1.80008e-06
MKNK1	665.436	1.10695	0.170232	6.50261	7.89386e-11	5.69493e-10
RP11-8J9.5	2.1983	4.00518	1.50439	2.66232	0.00776037	0.0194676
RP11-346M5.1	2.66058	3.46603	1.35736	2.55352	0.010664	0.0257784
RP11-184J23.2	8.74808	5.25053	1.16487	4.50739	6.56303e-06	2.79418e-05
STIL	113.929	1.23337	0.359855	3.42742	0.000609356	0.00192397
CMPK1	434.982	0.810901	0.188386	4.30447	1.67382e-05	6.74279e-05
ATP6V0E1P4	2.47785	4.19999	1.50372	2.79307	0.00522109	0.0136499
PPP1R8P1	37.5573	8.10863	1.07131	7.56889	3.76422e-14	3.61652e-13
RP11-329A14.1	20.7274	-1.01249	0.390501	-2.59279	0.00951997	0.0233056
FCF1P6	18.4966	7.08686	1.09637	6.46392	1.02028e-10	7.28984e-10
FAF1	219.403	0.775907	0.283565	2.73625	0.00621429	0.0159338
PHBP12	8.23682	4.3947	1.16815	3.7621	0.000168495	0.000585676
MRPS6P2	2.47832	3.36426	1.38827	2.42334	0.0153785	0.0355221
RP11-296A18.3	12.4659	2.91691	0.693458	4.20633	2.59549e-05	0.000101457
RNF11	90.994	-0.979449	0.42071	-2.32808	0.0199076	0.044596
RP11-296A18.5	34.212	-0.82417	0.31346	-2.62927	0.00855685	0.0211935
TTC39A	45.3272	1.46705	0.426473	3.43996	0.000581811	0.00184801
RP11-275F13.1	1.44339	3.408	1.67939	2.0293	0.0424274	0.0853377
EPS15	342.402	2.65909	0.279168	9.52506	1.64948e-21	2.83037e-20
SNORA26	47.741	-0.656162	0.289009	-2.27039	0.0231842	0.0509649
NRD1	1730.75	2.70161	0.184827	14.617	2.1881e-48	1.05463e-46
TXNDC12	2175.43	1.62027	0.21789	7.43617	1.0365e-13	9.61686e-13
BTF3L4	1055.8	-2.54175	0.159024	-15.9834	1.66849e-57	9.48485e-56
RP4-800M22.1	25.2827	1.031	0.421337	2.44697	0.0144061	0.0335687
RP4-800M22.2	63.0717	8.85718	1.06683	8.3023	1.02119e-16	1.21195e-15
ANAPC10P1	80.6319	7.76358	1.04407	7.4359	1.03857e-13	9.62822e-13
CC2D1B	45.2451	-1.15287	0.424907	-2.71323	0.00666317	0.0169858
RP11-155O18.6	9.28647	-2.33549	0.664115	-3.5167	0.000436945	0.00141946
PLA2G12AP1	6.79673	2.36196	0.805543	2.93213	0.00336647	0.00918574
ORC1	323.792	2.54947	0.231779	10.9996	3.83915e-28	9.83601e-27
PRPF38A	391.074	-1.55048	0.158091	-9.80748	1.04542e-22	1.95388e-21
ZCCHC11	143.89	1.05836	0.269062	3.93353	8.37089e-05	0.000303513
EEF1GP7	3.28693	2.96746	1.30109	2.28075	0.0225631	0.0497679
NDUFS5P3	2801.29	6.05892	0.204099	29.6861	1.1596e-193	4.36599e-191
ZYG11B	55.3479	-0.913543	0.344	-2.65564	0.00791569	0.0198171
RP11-159C21.4	34630	-0.923912	0.148366	-6.22723	4.74755e-10	3.17387e-09
ZYG11A	147.545	1.85163	0.348062	5.31983	1.03866e-07	5.44457e-07
RP4-631H13.6	4424.15	-1.8566	0.144669	-12.8334	1.06544e-37	4.10668e-36
RP4-631H13.4	5.95458	5.45494	1.23026	4.43396	9.25157e-06	3.86409e-05
SCP2	1626.85	1.29896	0.197154	6.58856	4.44118e-11	3.26848e-10
TUBBP10	7.85478	5.09726	1.18591	4.29819	1.72196e-05	6.91848e-05
CPT2	338.543	-1.04855	0.172014	-6.09576	1.08918e-09	7.00737e-09
RP5-1024G6.2	40.4779	-0.624549	0.305782	-2.04246	0.0411055	0.0831812
NDC1	789.256	2.13875	0.231073	9.25575	2.1273e-20	3.34333e-19
SNORA58	244.971	-3.46228	0.204732	-16.9113	3.71505e-64	2.35974e-62
YIPF1	390.071	2.31621	0.247089	9.37396	6.98607e-21	1.14289e-19
HSPB11	1460.52	0.886976	0.146624	6.04932	1.45461e-09	9.23942e-09
LRRC42	485.535	0.823064	0.207008	3.97599	7.00861e-05	0.000256844
TMEM59	2977.42	2.36644	0.205625	11.5085	1.19557e-30	3.47812e-29
TCEANC2	142.889	0.733455	0.244063	3.00518	0.00265419	0.00738575
RP4-758J24.4	1455.12	7.55187	0.296206	25.4953	2.22123e-143	4.33874e-141
AL357673.1	13.1869	-1.4597	0.572199	-2.55104	0.0107402	0.0259432
CYB5RL	55.7791	0.776235	0.292914	2.65004	0.00804823	0.0201067
MRPL37	1778.97	1.78726	0.166494	10.7347	6.9954e-27	1.67961e-25
SSBP3	68.2898	-1.14016	0.33944	-3.35894	0.000782421	0.002423
ACOT11	6.16693	2.55088	0.998655	2.55431	0.0106398	0.0257245
RP11-67L3.5	43.0283	0.821443	0.38201	2.15032	0.0315301	0.0661756
GYG1P3	60.0584	8.78662	1.08068	8.13065	4.27007e-16	4.82944e-15
RP11-377K22.2	486.721	-1.30714	0.605183	-2.15991	0.0307794	0.0648831
PRKAA2	100.738	0.859572	0.233065	3.68812	0.000225921	0.000770135
DAB1	115.644	0.611288	0.281912	2.16836	0.0301313	0.0637236
HNRNPA1P6	7.37409	5.7673	1.21197	4.75862	1.94924e-06	8.84838e-06
RPS26P15	16548.1	-1.68277	0.139378	-12.0734	1.45969e-33	4.85547e-32
OMA1	276.238	2.11934	0.238561	8.88385	6.4586e-19	9.16374e-18
RP4-592A1.2	1005.32	1.41302	0.198045	7.13486	9.68843e-13	8.24692e-12
MYSM1	107.441	0.787008	0.246656	3.19071	0.00141926	0.0041747
JUN	142.661	-1.99902	0.319325	-6.26013	3.84654e-10	2.59153e-09
PHBP3	1095.59	8.72266	0.457686	19.0582	5.61811e-81	4.66303e-79
FGGY	56.8327	3.007	0.417828	7.19675	6.1664e-13	5.33457e-12
HOOK1	68.644	0.633184	0.310899	2.03662	0.0416877	0.0841823
CYP2J2	158.97	2.25044	0.329097	6.83823	8.01798e-12	6.35058e-11
NFIA	87.5663	1.27789	0.280492	4.55588	5.21658e-06	2.25119e-05
TM2D1	2076.32	1.95302	0.215891	9.04634	1.47836e-19	2.19591e-18
INADL	85.4904	2.10018	0.350296	5.99545	2.02921e-09	1.27274e-08
LAMTOR5P1	561.781	9.57232	0.748467	12.7892	1.88303e-37	7.15193e-36
RP11-293K19.1	3.10433	-4.94276	1.40167	-3.52633	0.000421359	0.00137381
ATG4C	655.297	2.71082	0.237616	11.4084	3.79493e-30	1.07747e-28
RP4-792G4.3	87.5862	9.33116	1.04748	8.90821	5.18636e-19	7.41125e-18
ALG6	789.982	2.5658	0.252767	10.1509	3.28399e-24	6.723e-23
ITGB3BP	1997.8	1.26803	0.192983	6.57069	5.0083e-11	3.66922e-10
EFCAB7	156.599	2.75023	0.289452	9.50151	2.0687e-21	3.52411e-20
DLEU2L	14.1253	2.74314	0.656212	4.18026	2.91172e-05	0.000112985
PGM1	457.884	2.61113	0.247767	10.5387	5.73157e-26	1.29591e-24
RAVER2	118.285	-0.822546	0.31446	-2.61574	0.00890337	0.021945
RP11-182I10.3	2.94468	-2.35358	1.07571	-2.18794	0.028674	0.0611042
RP4-535B20.2	29.1574	4.9488	0.893066	5.54136	3.00128e-08	1.66496e-07
MRPS21P1	10.6962	6.29736	1.12941	5.5758	2.46392e-08	1.37716e-07
AK4	155.866	-1.2636	0.261189	-4.83789	1.31226e-06	6.08661e-06
RP4-700A9.1	26.3843	3.08904	0.519703	5.94387	2.78376e-09	1.7182e-08
DNAJC6	35.9829	1.46721	0.343657	4.26942	1.95982e-05	7.79697e-05
LEPROT	186.21	0.674382	0.212788	3.16927	0.00152824	0.00446391
RP11-430H12.2	12.6468	5.79682	1.16335	4.98285	6.26535e-07	3.01343e-06
PDE4B	6.98629	2.74723	1.13153	2.4279	0.0151865	0.0351192
WDR78	24.6814	1.92	0.465698	4.12285	3.74211e-05	0.000142818
MIER1	242.42	1.66821	0.245548	6.79383	1.09198e-11	8.54397e-11
SLC35D1	44.2875	1.15713	0.411339	2.81308	0.00490691	0.0129169
SNORA31	31.0455	-1.22351	0.410831	-2.97813	0.00290014	0.00802201
SERBP1	922.963	-1.46391	0.320841	-4.56271	5.04969e-06	2.18316e-05
GADD45A	27.9467	-0.898329	0.404744	-2.2195	0.0264527	0.0570919
GNG12	301.583	0.845698	0.176342	4.79578	1.62039e-06	7.43536e-06
GNG12-AS1	67.0829	-0.680285	0.260395	-2.61251	0.00898791	0.0221229
RP4-609E1.2	3.78521	4.79852	1.31895	3.63814	0.000274617	0.00092353
WLS	953.422	2.38086	0.192381	12.3757	3.5359e-35	1.24639e-33
CTBP2P8	14.8419	1.46978	0.537446	2.73475	0.00624269	0.0159924
RPS7P4	829.926	-2.5798	0.19504	-13.227	6.12658e-40	2.51839e-38
TCEB1P18	2.80718	4.35667	1.41067	3.08836	0.00201264	0.00573757
RP5-1033K19.2	49.466	8.50545	1.07103	7.94137	1.99954e-15	2.12981e-14
DEPDC1	184.46	-0.634274	0.208458	-3.04269	0.0023447	0.00661379
RP4-694A7.2	43.2726	-2.9647	0.410819	-7.21655	5.33228e-13	4.63767e-12
PIN1P1	14.3329	5.23581	1.08872	4.80912	1.51595e-06	6.98276e-06
LRRC40	487.177	2.91733	0.285893	10.2043	1.89771e-24	3.92833e-23
SRSF11	598.308	0.556492	0.21071	2.64103	0.00826549	0.020562
ANKRD13C	78.7345	0.862331	0.312246	2.7617	0.00575004	0.0148652
HHLA3	188.578	0.630821	0.275076	2.29326	0.0218329	0.0483349
CTH	326.073	3.19531	0.278502	11.4732	1.79881e-30	5.19235e-29
RP11-42O15.2	53.4505	3.5951	0.442296	8.12826	4.35492e-16	4.91898e-15
CASP3P1	9.32819	6.10442	1.17286	5.20474	1.94274e-07	9.90926e-07
ZRANB2-AS1	233.361	-1.1104	0.195377	-5.68341	1.32037e-08	7.60239e-08
ZRANB2	888.56	1.52117	0.203635	7.47007	8.01518e-14	7.50907e-13
GDI2P2	136.639	9.9735	1.06102	9.39994	5.45929e-21	9.01158e-20
LRRIQ3	79.1273	0.672343	0.305413	2.20142	0.0277061	0.0593191
FPGT	92.2077	1.17766	0.336185	3.50302	0.000460016	0.00148734
FPGT-TNNI3K	76.6858	1.55197	0.400856	3.87162	0.000108112	0.000386388
TNNI3K	76.4788	1.54679	0.400835	3.85892	0.000113889	0.000405742
CRYZ	659.484	0.958752	0.244019	3.929	8.52983e-05	0.000308931
TYW3	637.161	1.53469	0.207154	7.40845	1.27787e-13	1.16935e-12
LHX8	21.0292	1.36579	0.527699	2.5882	0.00964783	0.0235853
SLC44A5	32.0848	0.943178	0.444609	2.12137	0.033891	0.0704208
RP4-595K12.2	11.1978	2.7233	0.781866	3.48307	0.000495694	0.00159396
ACADM	1617.66	0.765388	0.248136	3.08455	0.00203862	0.00580334
RP4-682C21.2	27.2248	1.48838	0.407751	3.65021	0.000262023	0.000883693
RABGGTB	1604.09	0.896272	0.182559	4.90949	9.13148e-07	4.31243e-06
SNORD45C	12.8444	-1.19443	0.565982	-2.11037	0.0348263	0.0720997
SNORD45B	10.0446	-1.83391	0.644835	-2.844	0.00445513	0.0118501
ST6GALNAC3	43.8635	0.890979	0.387072	2.30184	0.0213441	0.0473931
TPI1P1	11876.3	-0.501631	0.189491	-2.64725	0.00811498	0.0202362
PIGK	687.334	2.13826	0.199766	10.7038	9.77006e-27	2.33502e-25
RP4-706A16.3	26946.6	-0.598756	0.155461	-3.85148	0.000117406	0.000417307
RP11-363H12.1	62.5963	5.3615	0.601996	8.9062	5.28138e-19	7.54288e-18
AK5	20.4761	2.13182	0.508182	4.19499	2.72878e-05	0.000106315
ZZZ3	180.454	0.809232	0.233413	3.46695	0.000526405	0.00168583
USP33	331.83	2.21381	0.232456	9.52358	1.67319e-21	2.86727e-20
FAM73A	81.0388	2.34906	0.364894	6.43764	1.21347e-10	8.59688e-10
NSRP1P1	39.2022	2.35517	0.397746	5.9213	3.19412e-09	1.96078e-08
NEXN-AS1	16.6928	-1.03108	0.500516	-2.06003	0.0393958	0.0801272
FUBP1	502.575	0.641889	0.198798	3.22886	0.00124286	0.00370321
RP11-386I14.4	45.8565	-1.21075	0.353476	-3.42526	0.000614202	0.0019381
RP11-386I14.2	285.373	11.0359	1.04999	10.5105	7.73008e-26	1.72674e-24
RP11-386I14.3	447.536	7.77977	0.485568	16.022	8.9704e-58	5.14441e-56
RNFT1P2	4.46551	5.04285	1.25568	4.01603	5.91867e-05	0.000219427
RP11-472F19.1	12.1639	3.07833	0.737002	4.17682	2.95612e-05	0.000114571
IFI44L	28.1908	3.01342	0.589763	5.10954	3.22937e-07	1.6072e-06
IFI44	8.1715	4.39123	1.1786	3.7258	0.000194699	0.000671635
RP4-641G12.4	153.14	10.1379	1.06547	9.515	1.81717e-21	3.10173e-20
PSAT1P3	297.469	7.84167	0.649577	12.072	1.48549e-33	4.93499e-32
RP5-837I24.5	61.784	-2.71995	0.492864	-5.51866	3.41599e-08	1.88536e-07
TTLL7	39.8259	1.79736	0.388994	4.62052	3.82772e-06	1.67974e-05
RP11-486G15.2	37.1703	-0.918738	0.342158	-2.68512	0.00725028	0.0183189
PRKACB	68.0981	1.40369	0.310697	4.51788	6.24613e-06	2.66757e-05
RP11-486G15.1	35.2627	8.01645	1.07896	7.42982	1.08745e-13	1.00573e-12
RP11-82H13.2	903.685	4.54216	0.197991	22.9413	1.80047e-116	2.31556e-114
SNORA2	6.21585	-1.69585	0.822412	-2.06205	0.0392034	0.0798171
SAMD13	21.6259	2.04568	0.504818	4.05232	5.07132e-05	0.000189838
RPF1	973.606	1.07324	0.166583	6.44272	1.17352e-10	8.33199e-10
GNG5	2397.6	-1.8402	0.149131	-12.3394	5.55447e-35	1.94474e-33
CTBS	72.3414	1.25768	0.385248	3.26461	0.00109616	0.00330322
SSX2IP	100.787	0.877936	0.243565	3.60452	0.000312733	0.00104187
MCOLN2	135.742	1.23215	0.22398	5.50117	3.77284e-08	2.07219e-07
WDR63	19.5088	2.85606	0.652096	4.37982	1.1878e-05	4.87793e-05
MCOLN3	98.7557	1.26941	0.310997	4.08173	4.47015e-05	0.000168525
DDAH1	32.2119	-1.12442	0.441871	-2.54468	0.0109378	0.0263814
ZNHIT6	117.306	0.616115	0.239798	2.56931	0.0101901	0.024734
COL24A1	24.4954	1.40487	0.516916	2.71779	0.00657194	0.0167747
ODF2L	231.138	1.43943	0.243637	5.90808	3.46111e-09	2.11712e-08
SH3GLB1	227.292	0.706242	0.185778	3.80153	0.000143803	0.00050471
RP4-612B15.2	16590.1	-0.557239	0.171197	-3.25497	0.00113406	0.00340991
2024-09-15	3138.65	1.06307	0.201915	5.26492	1.40252e-07	7.2611e-07
RP5-1052I5.2	48.3797	1.14901	0.334914	3.43076	0.000601894	0.00190458
RP11-384B12.2	85.6447	7.25842	0.888568	8.16867	3.11818e-16	3.56232e-15
RP11-384B12.3	87.0204	8.59717	1.08089	7.95379	1.80896e-15	1.93157e-14
LMO4	129.958	0.642353	0.199143	3.2256	0.00125711	0.00373966
RP11-76N22.1	1.84885	3.7648	1.52172	2.47404	0.0133594	0.0314283
PKN2	204.136	1.1483	0.196825	5.8341	5.40826e-09	3.24109e-08
GTF2B	1218.68	1.64994	0.225425	7.31925	2.49353e-13	2.23377e-12
CCBL2	648.656	1.9746	0.219085	9.01291	2.0066e-19	2.9485e-18
GBP1	6.10406	1.91406	0.972703	1.96777	0.0490941	0.0965823
RP4-620F22.3	262.297	10.9144	1.04096	10.485	1.01282e-25	2.25082e-24
GEMIN8P4	76.3798	1.23612	0.329235	3.75454	0.000173662	0.000602747
ZNF326	287.057	1.45444	0.203666	7.14133	9.24324e-13	7.88087e-12
U3	250.789	-0.851833	0.185989	-4.58002	4.64942e-06	2.01884e-05
PHKA1P1	4.8571	3.60548	1.25053	2.88317	0.00393691	0.0105866
RPL5P6	1172.86	6.64636	0.267531	24.8433	3.05488e-136	5.36234e-134
CDC7	377.597	1.79097	0.260219	6.88253	5.87998e-12	4.70453e-11
RP11-47K11.2	2.71477	4.3269	1.39617	3.09913	0.00194093	0.00554347
RP11-91I11.1	7.77	-1.60445	0.725077	-2.2128	0.0269115	0.057904
HSP90B3P	40.8415	3.34709	0.469293	7.13219	9.87872e-13	8.39514e-12
TGFBR3	41.964	0.868987	0.384076	2.26254	0.0236641	0.0518881
EPHX4	56.3489	1.92879	0.356842	5.40517	6.47486e-08	3.46254e-07
SETSIP	120.283	0.782614	0.220847	3.54369	0.000394565	0.00129196
BTBD8	13.4301	3.45848	0.800577	4.31998	1.56043e-05	6.30654e-05
PRKAR1AP	60.5423	8.79881	1.06762	8.24149	1.70073e-16	1.98398e-15
C1orf146	5.08649	-1.77166	0.818587	-2.16429	0.0304424	0.06426
GLMN	650.426	2.25856	0.242716	9.30538	1.33516e-20	2.12929e-19
RPAP2	416.365	1.20681	0.207781	5.80807	6.31987e-09	3.76137e-08
RP11-330C7.3	4.93775	3.60654	1.31089	2.75122	0.00593743	0.0153009
RPL5	16397.6	-4.91596	0.279894	-17.5637	4.67645e-69	3.2311e-67
SNORA66	5.25163	-1.52661	0.746456	-2.04515	0.0408401	0.082702
FAM69A	184.018	1.62027	0.258232	6.2745	3.50765e-10	2.37553e-09
SNORA51	17.6528	-1.69641	0.468156	-3.6236	0.000290528	0.000973008
RP11-386I23.1	72.7844	7.02288	0.87581	8.01873	1.06847e-15	1.16777e-14
MTF2	363.847	1.86884	0.259619	7.1984	6.09227e-13	5.27219e-12
TMED5	968.748	1.00987	0.188853	5.34742	8.92168e-08	4.70803e-07
RP4-717I23.3	98.9509	1.37837	0.292503	4.71234	2.44893e-06	1.09842e-05
FNBP1L	96.3173	1.58327	0.317342	4.98916	6.06436e-07	2.92347e-06
RP4-561L24.3	9.78527	1.31296	0.646994	2.02933	0.0424249	0.0853377
DNTTIP2	905.39	1.24131	0.201681	6.15483	7.5156e-10	4.9218e-09
GCLM	66.282	-1.38864	0.425565	-3.26304	0.00110224	0.00332078
ABCA4	6.18116	3.33462	1.17044	2.84902	0.00438537	0.0116765
ABCD3	676.903	1.76295	0.226092	7.79748	6.31576e-15	6.45973e-14
LINC01057	16.7477	1.72567	0.686644	2.5132	0.0119641	0.0285466
SLC44A3	15.7636	2.38183	0.757981	3.14234	0.00167605	0.00485691
CNN3	537.809	0.852374	0.18387	4.63574	3.55665e-06	1.56634e-05
ALG14	633.969	0.713972	0.163407	4.36929	1.2465e-05	5.1077e-05
TMEM56-RWDD3	197.112	-0.906598	0.189767	-4.77744	1.77543e-06	8.09903e-06
RP4-736I12.1	38.8532	8.15767	1.0945	7.4533	9.10369e-14	8.48905e-13
UBE2WP1	7.93335	5.86509	1.17221	5.00343	5.63203e-07	2.72975e-06
EEF1A1P11	37151.4	-1.4584	0.151663	-9.6161	6.83764e-22	1.2117e-20
NDUFS5P2	4.94867	2.9685	1.08162	2.74449	0.00606043	0.0155792
RPL7P9	21825.9	-0.767024	0.162688	-4.7147	2.42066e-06	1.08687e-05
PTBP2	131.517	1.80587	0.302558	5.96867	2.39189e-09	1.48586e-08
DPYD	122.287	2.3472	0.284557	8.24859	1.60275e-16	1.87389e-15
SEC63P1	116.439	0.923231	0.226187	4.08171	4.47059e-05	0.000168525
SNX7	199.056	0.770196	0.184934	4.16471	3.11742e-05	0.000120338
LPPR4	14.0414	1.14611	0.53697	2.13439	0.0328105	0.0685526
RP4-735N21.1	47.7473	8.45666	1.0689	7.91152	2.5426e-15	2.67751e-14
FRRS1	51.9979	3.96983	0.510629	7.77439	7.5809e-15	7.69013e-14
HIAT1	341.643	2.3606	0.249501	9.46128	3.0419e-21	5.13152e-20
SASS6	158.04	1.70888	0.331693	5.15199	2.57739e-07	1.29739e-06
TRMT13	126.19	1.24569	0.33419	3.72749	0.000193396	0.000667495
DBT	83.6123	0.980753	0.292111	3.35747	0.000786599	0.00243506
RP11-305E17.7	6.66066	-6.81694	1.24755	-5.46424	4.64895e-08	2.52456e-07
RTCA	593.461	2.19314	0.199204	11.0095	3.43829e-28	8.85266e-27
RP5-837M10.1	71.4573	8.31265	1.06743	7.7875	6.83484e-15	6.9496e-14
CDC14A	100.559	1.72574	0.316943	5.44497	5.18152e-08	2.79682e-07
BCAS2P2	191.252	7.41952	0.637687	11.6351	2.73416e-31	8.24021e-30
EXTL2	173.431	0.803596	0.257049	3.12624	0.00177056	0.00510573
RP4-549L20.3	17.1336	-1.76545	0.46375	-3.80689	0.000140724	0.000494504
SLC30A7	186.626	1.42666	0.249318	5.72224	1.05126e-08	6.12349e-08
DPH5	1171.23	1.43577	0.202896	7.07635	1.48003e-12	1.24031e-11
AC093157.1	405.842	-0.78609	0.184592	-4.25854	2.05768e-05	8.15881e-05
RP11-421L21.3	125.717	0.883228	0.281439	3.13826	0.00169956	0.00491954
RP4-575N6.2	4.62184	5.09239	1.26016	4.04107	5.32086e-05	0.00019855
RP11-556K13.1	24093.8	-0.563567	0.178118	-3.16402	0.00155608	0.00453708
RNPC3	45.3691	-1.61763	0.318401	-5.08049	3.76462e-07	1.85828e-06
AMY2B	76.1425	0.8372	0.279836	2.99175	0.00277379	0.00769547
ACTG1P4	37.6398	8.11203	1.0676	7.59838	2.99865e-14	2.9003e-13
RP11-364B6.2	2.55632	3.39011	1.3997	2.42202	0.0154344	0.0356419
RP11-364B6.1	2.63179	3.43609	1.38603	2.47908	0.013172	0.0310439
SEPT2P1	127.696	9.87566	1.06538	9.26962	1.86814e-20	2.95209e-19
RP11-90H3.2	205.165	7.79235	0.691051	11.2761	1.7226e-29	4.75574e-28
RP11-90H3.1	219.395	7.88696	0.710641	11.0984	1.27745e-28	3.35899e-27
PRMT6	86.7522	-0.807858	0.395216	-2.04409	0.0409444	0.0828939
RP11-270C12.3	7040.14	-0.634683	0.153909	-4.12375	3.72746e-05	0.000142343
FAM102B	26.3237	-1.56359	0.478434	-3.26813	0.0010826	0.0032639
FNDC7	1.51058	-4.66326	1.90614	-2.44644	0.0144276	0.0336097
STXBP3	704.89	2.51277	0.243277	10.3289	5.218e-25	1.11205e-23
AKNAD1	98.837	-0.798966	0.284288	-2.81041	0.00494789	0.0130063
CLCC1	549.098	1.40581	0.209622	6.70641	1.99471e-11	1.5219e-10
RP11-20O24.4	26870.6	-0.599464	0.156261	-3.83629	0.000124907	0.000441732
RP11-20O24.1	208.409	-3.63114	0.21332	-17.022	5.63748e-65	3.63415e-63
RANP5	13.9378	5.93803	1.10564	5.37067	7.84449e-08	4.16412e-07
RP5-1065J22.8	97.2852	-0.732692	0.279464	-2.62178	0.00874723	0.0216012
TMEM167B	191.211	0.635783	0.242006	2.62714	0.00861066	0.0213085
SARS	2617.6	1.86005	0.238729	7.79147	6.62357e-15	6.74671e-14
CELSR2	20.9974	-1.55308	0.423289	-3.66907	0.000243437	0.000825943
PSRC1	121.25	-0.550558	0.253741	-2.16977	0.0300245	0.0635443
PSMA5	6067.12	1.37424	0.158971	8.64455	5.40158e-18	7.15228e-17
SYPL2	14.1845	-1.89044	0.540728	-3.4961	0.000472118	0.00152343
GNAI3	917.14	1.47333	0.219215	6.72093	1.80571e-11	1.38379e-10
AMPD2	71.1878	-0.866491	0.281077	-3.08276	0.00205092	0.00583516
GSTM1	140.629	1.81467	0.241276	7.52115	5.42981e-14	5.15009e-13
AC000032.2	135.506	1.83745	0.245418	7.48703	7.04509e-14	6.61693e-13
RP4-735C1.4	1093.77	-0.929563	0.162859	-5.70777	1.14467e-08	6.64821e-08
AHCYL1	133.946	-0.835132	0.332592	-2.51098	0.0120396	0.0287109
SNORA25	370.295	-3.55017	1.04777	-3.38831	0.000703245	0.00219475
RP5-1074L1.1	65.3129	-0.97275	0.257692	-3.77486	0.000160101	0.00055784
RBM15	132.736	-1.40522	0.247517	-5.67725	1.36874e-08	7.86172e-08
SLC16A4	10.263	1.32426	0.645567	2.05132	0.0402359	0.0816695
RP5-1074L1.4	7.08508	-1.66179	0.681448	-2.43862	0.0147433	0.0342285
LAMTOR5-AS1	2187.61	-2.98064	0.160348	-18.5886	3.97383e-77	3.10018e-75
LAMTOR5	3377.29	-0.648139	0.158792	-4.0817	4.47083e-05	0.000168525
KCNA3	4.70527	-2.4634	0.931186	-2.64544	0.0081584	0.0203272
LRIF1	180.328	-0.611422	0.219912	-2.78031	0.00543076	0.0141326
RP11-96K19.5	116.328	-1.61501	0.265191	-6.09	1.12913e-09	7.25184e-09
CCNT2P1	1.48435	3.44395	1.74491	1.97371	0.0484143	0.0954364
DRAM2	1205.23	1.8943	0.225697	8.39313	4.73377e-17	5.79541e-16
CEPT1	949.069	0.693391	0.219245	3.16263	0.00156353	0.00455727
RP5-1180E21.5	251.116	-0.760116	0.168842	-4.50193	6.73384e-06	2.86034e-05
HIGD1AP12	235.105	3.95456	0.274655	14.3983	5.30611e-47	2.48822e-45
RP11-552M11.4	428.411	-1.16528	0.197649	-5.89571	3.73081e-09	2.27465e-08
ATP5F1	3674.65	-0.885812	0.175536	-5.04632	4.5041e-07	2.20445e-06
FAM212B	24.5522	-0.864991	0.424564	-2.03736	0.0416137	0.0840458
DDX20	104.829	-0.743846	0.241517	-3.07989	0.00207074	0.00588769
ST7L	307.445	1.18934	0.191312	6.21674	5.07577e-10	3.38524e-09
CAPZA1	1326.91	1.03536	0.232211	4.45873	8.24482e-06	3.46197e-05
RP11-426L16.10	298.259	-2.10197	0.265185	-7.92643	2.25542e-15	2.38865e-14
RP11-426L16.7	15.7254	4.77613	0.953215	5.01055	5.4276e-07	2.63607e-06
RP11-426L16.8	38.5454	-0.634877	0.299248	-2.12158	0.0338732	0.0703994
AKR7A2P1	1.7886	3.72875	1.78767	2.08581	0.0369957	0.0759895
SLC16A1-AS1	56.8095	0.652706	0.320822	2.03448	0.0419034	0.084493
LRIG2	73.2494	1.03768	0.331882	3.12664	0.00176814	0.005101
RP11-389O22.4	71.6115	2.59121	0.299345	8.65628	4.87413e-18	6.47367e-17
RP11-512F24.1	919.836	-0.944567	0.19402	-4.8684	1.12508e-06	5.25596e-06
AP4B1-AS1	32.1357	-0.881632	0.328331	-2.68519	0.00724878	0.0183169
TRIM33	50.143	-0.876649	0.446631	-1.9628	0.049669	0.0975174
PKMP1	894.067	9.24289	0.574934	16.0764	3.73342e-58	2.15057e-56
BCAS2	1115.4	-0.733497	0.173456	-4.22871	2.35031e-05	9.2471e-05
DENND2C	32.2817	1.42132	0.485911	2.92505	0.00344397	0.00937456
CSDE1	3635.38	1.41036	0.18991	7.42646	1.11546e-13	1.02907e-12
TSPAN2	67.0277	2.19003	0.444794	4.9237	8.49245e-07	4.02234e-06
NGF	1.59556	-3.94585	1.64688	-2.39595	0.0165775	0.0379711
NHLH2	5.84237	-1.94081	0.954869	-2.03254	0.042099	0.084815
ATP1A1OS	595.155	-1.54399	0.231307	-6.67506	2.47131e-11	1.86797e-10
RNU6-817P	17.8129	-1.15171	0.507026	-2.2715	0.0231169	0.0508384
CD58	171.43	0.783419	0.267279	2.93109	0.00337772	0.0092116
NAP1L4P1	55.1564	5.87898	0.717106	8.1982	2.44014e-16	2.81368e-15
PTGFRN	120.351	-1.27426	0.398456	-3.19799	0.00138391	0.00408043
TTF2	272.636	1.30306	0.209822	6.21032	5.28784e-10	3.51787e-09
MAN1A2	70.3269	-1.48603	0.367409	-4.04462	5.24085e-05	0.000195762
VPS25P1	16.9426	6.95883	1.10475	6.29898	2.99611e-10	2.03919e-09
AL390877.1	270.733	-0.868464	0.276173	-3.14464	0.00166293	0.00482264
GDAP2	179.401	2.39717	0.23662	10.1309	4.02892e-24	8.20277e-23
WDR3	469.367	1.47779	0.250884	5.89035	3.85367e-09	2.34566e-08
SPAG17	61.9321	-2.20971	0.292767	-7.5477	4.43007e-14	4.22655e-13
PSMC1P12	19.5916	-3.24017	0.567665	-5.70789	1.14386e-08	6.645e-08
WARS2	232.893	1.1947	0.249435	4.7896	1.67111e-06	7.65542e-06
RPL6P2	2.6971	4.31265	1.37955	3.12612	0.0017713	0.00510616
RP5-834N19.1	9.15576	-1.54388	0.74197	-2.08079	0.0374529	0.076723
PHGDH	2762.6	2.34535	0.238216	9.84551	7.16756e-23	1.35324e-21
RP5-1042I8.7	2.45751	-3.24851	1.46473	-2.21783	0.0265666	0.0572997
RP11-439A17.7	12.9285	2.17335	0.695561	3.1246	0.00178045	0.0051291
HIST2H2BA	49.4943	-2.61764	0.361112	-7.24882	4.20431e-13	3.69874e-12
SRGAP2C	50.4348	1.19491	0.36395	3.28318	0.00102644	0.00311159
RP11-343N15.5	32.5021	-0.888628	0.404445	-2.19716	0.0280093	0.0598745
RP11-344P13.3	59.0435	8.76289	1.05533	8.30344	1.01141e-16	1.20144e-15
EMBP1	29.8715	1.71292	0.420703	4.07157	4.66965e-05	0.000175536
RP11-417J8.6	105.412	-2.32779	0.286766	-8.11741	4.76251e-16	5.35144e-15
ANKRD20A12P	66.3241	-2.45762	0.330558	-7.43477	1.04751e-13	9.69823e-13
RP11-423O2.5	33.9272	-0.886578	0.353306	-2.50938	0.0120944	0.0288285
ANKRD20A14P	12.2662	-1.33799	0.521075	-2.56775	0.0102361	0.0248294
RP11-782C8.2	168.657	-1.8098	0.229884	-7.87265	3.472e-15	3.62391e-14
RP11-782C8.1	99.8442	-1.83514	0.229117	-8.00963	1.15055e-15	1.25326e-14
RP11-782C8.5	19.5004	-1.44026	0.428277	-3.36293	0.000771199	0.00239138
RP11-435B5.3	17.9527	-0.947706	0.466998	-2.02936	0.0424221	0.0853377
RP11-435B5.4	220.684	-1.13975	0.204287	-5.57917	2.4167e-08	1.35187e-07
RP11-435B5.5	110.214	-1.30328	0.277043	-4.70427	2.54773e-06	1.14077e-05
RNVU1-1	4.6534	-2.03346	0.888969	-2.28744	0.0221702	0.0490137
RNVU1-3	9.09893	-2.03855	0.681669	-2.99053	0.00278496	0.00772428
RP6-206I17.3	18.4558	-1.57145	0.442727	-3.54947	0.000386014	0.001267
RP6-206I17.4	18.5285	-1.54802	0.441849	-3.5035	0.00045918	0.001485
PPIAL4G	35.4385	1.0491	0.459311	2.28407	0.0223674	0.0493907
SRGAP2B	28.8384	2.48108	0.535073	4.63689	3.53685e-06	1.55894e-05
RP3-365I19.2	36.4175	5.26134	0.764888	6.87858	6.04536e-12	4.82644e-11
RNVU1-4	28.2752	-1.93584	0.40645	-4.7628	1.90928e-06	8.67458e-06
PPIAL4B	8.31685	-1.61711	0.663646	-2.4367	0.014822	0.0343834
RNVU1-5	28.4491	-1.94737	0.404368	-4.81584	1.46582e-06	6.76749e-06
NBPF9	199.499	-1.82643	0.272591	-6.70026	2.08054e-11	1.58366e-10
SEC22B	579.064	0.968202	0.256391	3.77627	0.000159196	0.000555208
NOTCH2NL	143.138	0.749146	0.211639	3.53974	0.000400516	0.00131062
RP11-458D21.5	151.647	0.752681	0.210525	3.57525	0.00034989	0.0011572
NBPF10	133.081	-1.17399	0.243185	-4.82755	1.38222e-06	6.39969e-06
POLR3GL	182.627	0.532268	0.23868	2.23005	0.025744	0.0558126
RP11-315I20.1	2187.7	-3.62591	0.160677	-22.5664	9.26382e-113	1.14059e-110
RBM8A	2647.89	-2.40693	0.153287	-15.7021	1.46208e-55	8.1335e-54
GNRHR2	68.7064	-0.854395	0.255618	-3.34247	0.000830356	0.00255985
PEX11B	203.62	0.585068	0.225881	2.59017	0.00959293	0.0234732
PIAS3	174.896	-1.07265	0.174708	-6.13968	8.26871e-10	5.3946e-09
NUDT17	153.133	-1.3907	0.180589	-7.70092	1.35094e-14	1.33903e-13
POLR3C	642.137	2.21369	0.207827	10.6516	1.71414e-26	4.01549e-25
GPR89A	238.859	-1.11739	0.16455	-6.79058	1.1168e-11	8.72323e-11
RNVU1-7	118.09	-3.74397	0.371578	-10.0759	7.06342e-24	1.42249e-22
RP11-94I2.1	2.19372	4.01728	1.46711	2.73823	0.00617712	0.0158447
NBPF11	114.783	-1.31252	0.293075	-4.47846	7.51846e-06	3.17494e-05
WI2-3658N16.1	99.0346	-1.52357	0.349189	-4.36316	1.28197e-05	5.24149e-05
NBPF12	106.391	-1.04619	0.260283	-4.01943	5.8338e-05	0.000216416
NBPF13P	15.1364	6.0661	1.11099	5.46009	4.75881e-08	2.58045e-07
RP11-325P15.1	19.1464	3.09221	0.603867	5.12068	3.04432e-07	1.51889e-06
RP11-325P15.2	430.764	7.17632	0.431397	16.6351	3.88364e-62	2.40222e-60
RP11-337C18.8	1100.62	1.61908	0.179851	9.00233	2.20977e-19	3.23788e-18
CCT8P1	1207.89	1.48014	0.169295	8.74297	2.27065e-18	3.09655e-17
CHD1L	902.225	2.79499	0.21803	12.8193	1.27875e-37	4.9143e-36
RP11-337C18.4	266.921	10.2172	1.0513	9.71865	2.51092e-22	4.55525e-21
ACP6	227.342	1.12058	0.218451	5.12964	2.90298e-07	1.45143e-06
GPR89B	242.19	-1.08044	0.16795	-6.4331	1.25026e-10	8.84061e-10
RNVU1-9	118.21	-3.60839	0.366078	-9.8569	6.3995e-23	1.21264e-21
XXyac-YX155B6.2	2.19372	4.01728	1.46711	2.73823	0.00617712	0.0158447
NBPF24	101.406	-1.20195	0.298722	-4.02365	5.73021e-05	0.000212847
RP11-495P10.3	3.97984	-2.41414	1.04224	-2.3163	0.0205416	0.0458188
RNVU1-12	8.89388	-1.99821	0.680413	-2.93676	0.00331659	0.00906583
RP11-495P10.10	18.4795	-1.62922	0.435279	-3.74293	0.00018189	0.000629455
NBPF14	100.017	-1.6117	0.233815	-6.89304	5.46115e-12	4.38022e-11
PPIAL4D	7.97925	-1.77147	0.700295	-2.5296	0.0114192	0.0274076
RNVU1-14	11.4394	-1.17227	0.582022	-2.01413	0.0439959	0.0879815
RP11-89F3.2	47.9864	-0.8612	0.306894	-2.80618	0.00501331	0.0131583
NBPF20	201.878	-1.67819	0.295002	-5.68876	1.27964e-08	7.38261e-08
NBPF15	238.965	-1.47783	0.221934	-6.65887	2.75939e-11	2.07305e-10
RP11-666A1.5	48.3703	-0.781978	0.31799	-2.45913	0.0139275	0.0326171
RP11-666A1.3	31.9574	-2.70606	0.408697	-6.62119	3.56328e-11	2.64562e-10
RNVU1-15	8.15322	-1.29881	0.618799	-2.09892	0.0358235	0.0739029
PPIAL4E	20.1212	-4.76636	0.643055	-7.41206	1.24353e-13	1.14114e-12
NBPF16	188.483	-1.74897	0.317385	-5.51056	3.577e-08	1.96879e-07
RP11-763B22.3	24.5679	-2.18412	0.438332	-4.9828	6.26721e-07	3.01343e-06
PPIAL4F	26.541	-3.47664	0.484649	-7.17353	7.30884e-13	6.28313e-12
RP11-14N7.2	327.738	0.749326	0.212759	3.52195	0.000428384	0.00139409
RNU1-92P	14.3995	-3.20726	0.609136	-5.26527	1.39987e-07	7.24879e-07
RNVU1-18	147.906	-2.71413	0.396707	-6.84165	7.82837e-12	6.20419e-11
RP11-403I13.5	63.3549	-1.07279	0.249977	-4.29154	1.77441e-05	7.11488e-05
RP5-998N21.3	1.83501	3.74767	1.62606	2.30476	0.0211802	0.0470694
HIST2H2BB	52.5278	-2.36887	0.370228	-6.39842	1.56995e-10	1.09905e-09
RP5-998N21.10	53.9609	-2.41973	0.372784	-6.49098	8.52794e-11	6.12686e-10
PPIAL4C	6.27647	-1.98318	0.816668	-2.42838	0.0151666	0.0350795
RNVU1-20	28.2752	-1.93584	0.40645	-4.7628	1.90928e-06	8.67458e-06
RP11-353N4.4	37.0226	-0.955378	0.320219	-2.98351	0.00284962	0.0078932
RP11-196G18.1	3.40232	4.64364	1.38703	3.34791	0.000814248	0.00251406
HIST2H2BF	56.3498	-2.03848	0.327194	-6.2302	4.65837e-10	3.11746e-09
RP11-196G18.23	27.4919	-1.11309	0.383653	-2.90129	0.00371625	0.0100494
HIST2H4A	212.461	-1.28929	0.21897	-5.88798	3.90949e-09	2.37689e-08
HIST2H3C	19.337	-1.81775	0.50369	-3.60887	0.000307538	0.00102562
HIST2H2AA3	227.523	-0.801143	0.256412	-3.12444	0.00178143	0.00513137
RP11-196G18.22	8.67008	-1.38353	0.683569	-2.02397	0.0429729	0.086268
HIST2H2BC	9.77866	-1.30782	0.553176	-2.36419	0.0180694	0.0409835
HIST2H2AA4	227.978	-0.812568	0.257017	-3.16153	0.0015694	0.00457233
HIST2H3A	19.337	-1.81775	0.50369	-3.60887	0.000307538	0.00102562
HIST2H4B	213.036	-1.29477	0.218715	-5.9199	3.22129e-09	1.97606e-08
HIST2H2AC	19.8395	-1.17295	0.432981	-2.70902	0.00674832	0.017181
HIST2H2AB	3.10407	-4.20698	1.3768	-3.05563	0.00224588	0.0063523
BOLA1	72.8654	-0.815615	0.238218	-3.42381	0.00061749	0.00194753
SF3B4	317.423	-0.932555	0.172249	-5.41399	6.16362e-08	3.30086e-07
VPS45	546.045	1.71944	0.248011	6.9329	4.12311e-12	3.34837e-11
ANP32E	1295.81	1.05744	0.175579	6.02257	1.71672e-09	1.08434e-08
MRPS21	3915.57	-0.569169	0.142912	-3.98266	6.8147e-05	0.000250409
PRPF3	183.123	-2.49193	0.243365	-10.2395	1.31932e-24	2.74417e-23
RPRD2	216.224	1.06018	0.247174	4.28923	1.79297e-05	7.17932e-05
TARS2	673.756	1.80429	0.204182	8.83667	9.86161e-19	1.37962e-17
MCL1	197.299	-1.31512	0.393188	-3.34476	0.000823543	0.00254065
ENSA	1677.27	-0.978835	0.130371	-7.50808	6.00001e-14	5.66609e-13
GOLPH3L	288.727	0.994515	0.213429	4.65971	3.16658e-06	1.4012e-05
HORMAD1	6.86774	-3.07645	0.833375	-3.69155	0.00022289	0.000760202
RP11-363I22.3	10.1534	6.21845	1.17303	5.30119	1.15049e-07	6.01138e-07
ARNT	336.39	2.30585	0.235624	9.78618	1.29085e-22	2.4005e-21
SETDB1	313.12	1.24356	0.207648	5.9888	2.11396e-09	1.32047e-08
CERS2	416.882	-1.03952	0.207285	-5.01491	5.3057e-07	2.57927e-06
RP11-316M1.12	336.837	-1.28653	0.249499	-5.15648	2.51639e-07	1.26939e-06
PRUNE	312.671	1.37174	0.276599	4.9593	7.07467e-07	3.37792e-06
C1orf56	126.933	-1.03428	0.267486	-3.86668	0.000110326	0.000393864
GABPB2	97.4529	1.16626	0.29619	3.93755	8.23167e-05	0.000298841
TNFAIP8L2	24.8286	-1.11088	0.42996	-2.58369	0.00977503	0.0238536
SCNM1	802.901	-0.691539	0.185712	-3.72372	0.000196308	0.000676736
TMOD4	7.02368	-1.35629	0.676057	-2.00618	0.0448366	0.089414
VPS72	675.257	0.839959	0.211121	3.97856	6.93325e-05	0.000254369
PIP5K1A	191.199	-1.60344	0.256486	-6.25156	4.06361e-10	2.7321e-09
PSMD4	1163.01	-1.6937	0.139244	-12.1635	4.86195e-34	1.64464e-32
RP11-126K1.2	203.846	-0.635543	0.240873	-2.63849	0.00832751	0.0206985
ZNF687	277.034	-1.24591	0.174628	-7.13469	9.70086e-13	8.25208e-12
PI4KB	217.738	0.61064	0.192417	3.17352	0.00150604	0.004407
RFX5	188.76	-1.26697	0.194281	-6.52134	6.96812e-11	5.04951e-10
RP11-126K1.8	118.29	-1.00412	0.254772	-3.94127	8.10523e-05	0.000294539
RP11-126K1.6	61.3364	-1.89617	0.303885	-6.23977	4.38216e-10	2.93943e-09
SELENBP1	154.795	0.597319	0.274283	2.17774	0.0294253	0.0624848
PSMB4	1803.57	-1.20585	0.158013	-7.63134	2.3232e-14	2.2664e-13
RNY4P25	9.21602	-2.25083	0.636643	-3.53547	0.000407058	0.00133102
CGN	25.5403	-1.48647	0.424752	-3.49963	0.000465905	0.00150469
TUFT1	67.1607	1.35159	0.365536	3.69756	0.000217685	0.00074362
RP11-74C1.2	14.8224	1.69082	0.668456	2.52944	0.0114245	0.0274178
SNX27	150.912	-0.541346	0.249252	-2.17189	0.0298643	0.0632414
RP11-98D18.15	322.285	-1.25691	0.182039	-6.90463	5.03342e-12	4.0484e-11
MRPL9	387.236	-0.757409	0.169839	-4.45957	8.21231e-06	3.44999e-05
OAZ3	204.686	-2.77024	0.220912	-12.54	4.50982e-36	1.64552e-34
RP11-98D18.3	163.612	-3.77678	0.235794	-16.0173	9.67773e-58	5.53783e-56
RP11-98D18.2	3.25086	-2.54877	1.12059	-2.27448	0.0229369	0.0504938
THEM4	150.252	-0.869722	0.202203	-4.30123	1.69853e-05	6.83378e-05
SPTLC1P4	61.9176	6.03727	0.721675	8.36564	5.97893e-17	7.28549e-16
HMGN3P1	923.664	4.31173	0.223009	19.3343	2.76226e-83	2.36055e-81
AL591704.5	1.99408	3.86751	1.51853	2.54688	0.0108692	0.0262256
RP1-178F15.5	1971.23	-0.820284	0.168115	-4.8793	1.06463e-06	4.9852e-06
S100A1	15.4861	-1.73522	0.536903	-3.2319	0.0012297	0.0036682
SNAPIN	758.84	-0.512604	0.162873	-3.14727	0.00164805	0.00478324
RP11-216N14.1	6.75149	5.63622	1.1794	4.77888	1.76273e-06	8.0453e-06
INTS3	276.855	0.68603	0.194358	3.52973	0.000415992	0.00135852
RP11-216N14.8	15.564	1.87904	0.569378	3.30017	0.000966279	0.00294359
SLC27A3	27.0723	-0.81408	0.405933	-2.00546	0.0449144	0.089522
GATAD2B	103.558	-0.612637	0.275647	-2.22254	0.0262468	0.0567145
RP11-216N14.7	17.9791	4.98584	0.951884	5.23786	1.62446e-07	8.36012e-07
DENND4B	53.167	-1.41581	0.404167	-3.50303	0.00046	0.00148734
SLC39A1	282.176	-0.869272	0.184348	-4.71538	2.41256e-06	1.08361e-05
RP11-422P24.11	43.0613	-1.03221	0.354554	-2.91128	0.00359951	0.00976726
RAB13	499.599	-2.91067	0.212721	-13.683	1.28212e-42	5.598e-41
RPS27	31572.5	-7.50091	0.14109	-53.1641	0	0
RP11-422P24.9	526.124	3.89388	0.212264	18.3445	3.65461e-75	2.72043e-73
TPM3	879.474	-1.04183	0.151822	-6.86216	6.78247e-12	5.4e-11
C1orf43	2127.64	0.850167	0.179826	4.72771	2.27064e-06	1.0234e-05
UBAP2L	2442.2	1.20775	0.193481	6.2422	4.31471e-10	2.89494e-09
HAX1	1744.5	-0.917011	0.174357	-5.2594	1.44528e-07	7.47948e-07
ATP8B2	55.58	-0.866032	0.36935	-2.34475	0.01904	0.0429078
RP11-350G8.4	24.7903	-0.845816	0.381928	-2.21459	0.026788	0.0577004
RP11-350G8.3	371.446	-1.17222	0.20337	-5.76398	8.2152e-09	4.84061e-08
RP11-350G8.7	553.319	11.9913	1.04157	11.5128	1.13775e-30	3.31734e-29
SHE	3.51377	-3.02833	1.14064	-2.65494	0.00793218	0.0198564
UBE2Q1	165.098	-0.772902	0.315265	-2.4516	0.0142224	0.0331971
UBE2Q1-AS1	15.0428	-4.72407	0.728436	-6.48523	8.85959e-11	6.3581e-10
ADAR	296.363	-1.04965	0.213659	-4.91272	8.98234e-07	4.24508e-06
KCNN3	2.6101	3.42588	1.39997	2.44711	0.0144006	0.0335588
PMVK	443.234	1.03943	0.221224	4.69856	2.62007e-06	1.17094e-05
PYGO2	88.1635	-1.00522	0.293229	-3.4281	0.000607822	0.00191983
RP11-307C12.12	27.9597	-1.11028	0.44686	-2.48463	0.0129685	0.0306308
CKS1B	6287.92	-1.4007	0.159301	-8.79274	1.45953e-18	2.01579e-17
ZBTB7B	11.6008	-1.31529	0.604368	-2.17631	0.0295322	0.0626863
DCST2	10.026	-1.60932	0.610234	-2.63723	0.0083587	0.0207661
RP11-307C12.11	8.42494	-1.68235	0.729806	-2.3052	0.0211552	0.0470218
EFNA1	16.1545	1.96539	0.638934	3.07604	0.00209769	0.0059578
DPM3	763.646	-0.975958	0.199649	-4.88837	1.01675e-06	4.77219e-06
HMGN2P18	3.01669	-3.49785	1.25523	-2.78662	0.00532603	0.0138921
MUC1	2.34866	-3.22857	1.6026	-2.01458	0.0439486	0.0879006
THBS3	12.9761	-1.00232	0.486968	-2.05829	0.0395621	0.0804219
RP11-263K19.6	808.532	-1.12335	0.197057	-5.70065	1.19351e-08	6.9195e-08
GBAP1	191.707	-0.731243	0.176933	-4.13288	3.58243e-05	0.000137046
MTX1P1	365.445	1.20421	0.223625	5.38495	7.24661e-08	3.86015e-07
FAM189B	189.247	-1.44079	0.40376	-3.56843	0.00035912	0.00118576
CLK2	79.131	-0.946549	0.273294	-3.46349	0.000533225	0.00170578
FDPS	2804.41	-0.524019	0.164738	-3.18091	0.00146812	0.00430768
RUSC1-AS1	2269.04	-1.39105	0.145168	-9.58238	9.48325e-22	1.66238e-20
DAP3P1	8.27783	4.41904	1.15573	3.82361	0.000131514	0.000464087
RP11-29H23.4	74.7345	-1.62627	0.316854	-5.13255	2.85846e-07	1.43027e-06
MSTO1	306.882	-0.671308	0.185768	-3.61368	0.000301878	0.00100881
MSTO2P	279.411	-0.562678	0.203864	-2.76007	0.00577896	0.0149311
RP11-29H23.5	211.044	-1.14165	0.180786	-6.31492	2.70301e-10	1.84842e-09
YY1AP1	349.766	0.982665	0.211056	4.65594	3.22505e-06	1.42513e-05
DAP3	2161.01	1.43418	0.207214	6.92125	4.47671e-12	3.61856e-11
GON4L	402.039	0.533934	0.208598	2.55963	0.0104784	0.0253674
RP11-101O6.2	2.86883	3.59506	1.43272	2.50926	0.0120984	0.0288353
RIT1	171.583	0.753768	0.308872	2.44039	0.0146715	0.034083
SSR2	4293.54	1.25482	0.177364	7.07483	1.49627e-12	1.25311e-11
UBQLN4	108.205	-1.27149	0.335065	-3.79476	0.000147786	0.000517709
PMF1-BGLAP	394.479	1.12943	0.200895	5.62197	1.88787e-08	1.06875e-07
PMF1	566.37	0.824304	0.177452	4.64521	3.39725e-06	1.49868e-05
TMEM79	611.918	-0.710706	0.174525	-4.07224	4.65634e-05	0.000175086
VHLL	6.09683	5.48192	1.22698	4.4678	7.90286e-06	3.32537e-05
CCT3	12486.8	1.8625	0.216061	8.62028	6.67922e-18	8.7947e-17
C1orf61	31.2272	-1.08392	0.37932	-2.85753	0.00426953	0.0113984
MEF2D	32.4138	-1.03318	0.405201	-2.54979	0.0107787	0.0260192
APOA1BP	1220.05	-0.662809	0.166728	-3.9754	7.02604e-05	0.000257446
GPATCH4	648.728	-0.857249	0.197493	-4.34065	1.42062e-05	5.77021e-05
CRABP2	87.8091	1.21096	0.346006	3.49981	0.000465589	0.00150386
ISG20L2	385.17	-0.521422	0.183667	-2.83896	0.00452613	0.0120156
MRPL24	1729.62	-0.797671	0.152881	-5.2176	1.81257e-07	9.28588e-07
HDGF	991.572	-1.17345	0.331	-3.54516	0.000392375	0.00128592
PRCC	438.485	0.690891	0.208707	3.31035	0.000931803	0.00284591
ETV3	31.2202	-0.804559	0.38549	-2.08711	0.0368785	0.0757844
MRPS21P2	5.58177	5.36372	1.22063	4.39423	1.11164e-05	4.58694e-05
EI24P2	23.8619	6.72335	1.07562	6.25067	4.08702e-10	2.74642e-09
DUSP23	16.4636	-2.29114	0.469835	-4.87647	1.08001e-06	5.0536e-06
TAGLN2	2014.54	-0.692095	0.160459	-4.31323	1.60885e-05	6.49313e-05
RP11-226L15.5	15.1176	-1.56532	0.474376	-3.29974	0.000967752	0.00294773
PIGM	140.192	-0.833648	0.222486	-3.74696	0.000178988	0.000620403
DCAF8	644.026	0.610679	0.214154	2.85159	0.00435013	0.0116005
COPA	625.609	1.61511	0.225006	7.17808	7.06975e-13	6.09575e-12
SUMO1P3	1299.48	-0.607109	0.201217	-3.01719	0.0025513	0.00712462
NCSTN	299.855	1.01399	0.26563	3.8173	0.000134922	0.000475339
VANGL2	33.9092	-1.02763	0.446197	-2.30309	0.0212736	0.0472486
RP11-312J18.5	674.236	-1.0662	0.163474	-6.52214	6.93135e-11	5.02426e-10
F11R	231.995	0.646531	0.258572	2.50039	0.0124057	0.0294595
RP11-544M22.13	175.211	0.808575	0.292492	2.76443	0.00570221	0.0147518
NIT1	307.577	-0.624853	0.221592	-2.81983	0.00480486	0.0126758
DEDD	340.744	-0.728775	0.192996	-3.77612	0.000159289	0.000555331
RP11-297K8.2	1530.25	-1.37555	0.192349	-7.15134	8.59353e-13	7.34863e-12
USP21	125.116	-0.697839	0.209564	-3.32996	0.000868573	0.00266722
PPOX	317.538	-0.734537	0.237912	-3.08742	0.00201899	0.00575377
NDUFS2	2102.43	1.54716	0.187037	8.27194	1.31802e-16	1.55428e-15
TOMM40L	77.3877	-0.586249	0.236917	-2.47449	0.0133428	0.0313923
MIR5187	10.0911	-3.93245	0.769589	-5.10981	3.2249e-07	1.60528e-06
NR1I3	74.2887	-0.691297	0.256045	-2.69991	0.00693589	0.0176136
SDHC	1707.75	-1.9518	0.139388	-14.0027	1.50095e-44	6.76965e-43
C1orf192	23.0379	-0.886353	0.395603	-2.24051	0.0250576	0.0545294
RP11-122G18.5	7.85917	-1.54905	0.630666	-2.45621	0.0140412	0.032845
RP11-122G18.7	579.538	-1.33688	0.610799	-2.18874	0.0286157	0.0610051
FCGR2A	17.6929	1.00758	0.473105	2.12971	0.0331954	0.0692456
RPS23P10	3.44366	3.04481	1.28713	2.36559	0.0180013	0.0408486
RPS23P9	3.03005	3.66283	1.39925	2.61771	0.00885225	0.0218335
RPL31P11	14307.4	1.07583	0.164502	6.53987	6.15704e-11	4.48552e-10
ATF6	820.475	2.60669	0.243689	10.6968	1.05367e-26	2.50901e-25
C1orf226	9.73606	-1.97687	0.72105	-2.74165	0.00611307	0.0157004
UHMK1	63.7483	-1.0844	0.318034	-3.4097	0.000650355	0.00204398
UAP1	271.174	-1.22168	0.17694	-6.90446	5.03932e-12	4.05189e-11
HSD17B7	250.211	-0.65619	0.234109	-2.80292	0.00506421	0.0132758
RP11-331H2.3	23.763	7.45071	1.07567	6.9266	4.31077e-12	3.49095e-11
RGS5	138.675	1.33078	0.262476	5.07011	3.97578e-07	1.9573e-06
RP11-267N12.3	118.2	1.07148	0.257589	4.15963	3.1876e-05	0.000122828
NUF2	967.932	2.46434	0.254731	9.67429	3.87767e-22	6.97632e-21
HMGB3P6	1134.09	-0.689115	0.160777	-4.28615	1.81798e-05	7.27162e-05
RP11-403P14.1	4134.09	7.50144	0.21822	34.3756	5.83574e-259	3.88735e-256
RXRG	68.2232	2.71641	0.441114	6.15807	7.36353e-10	4.82586e-09
MGST3	5434.55	1.29764	0.184414	7.03655	1.97063e-12	1.63719e-11
ALDH9A1	1177.41	1.82848	0.246467	7.41876	1.18222e-13	1.08796e-12
TMCO1	3053.66	0.918945	0.196533	4.67577	2.92857e-06	1.30146e-05
RP11-466F5.9	100.421	4.09777	0.335959	12.1972	3.21518e-34	1.09904e-32
UCK2	645.399	0.517281	0.157055	3.29363	0.000989013	0.00300826
FAM78B	7.26107	-1.88206	0.826395	-2.27744	0.0227602	0.050152
AL626787.1	4.60438	-2.62679	0.995015	-2.63995	0.00829179	0.0206176
RPL4P2	274.508	-0.987307	0.412147	-2.39552	0.0165969	0.038007
TADA1	334.949	1.15971	0.264544	4.38382	1.16618e-05	4.79446e-05
DUTP6	2.83779	3.56411	1.34821	2.6436	0.00820307	0.0204204
RP11-277B15.1	85.343	1.30194	0.250523	5.1969	2.0264e-07	1.03183e-06
CREG1	130.555	-1.23196	0.287188	-4.28972	1.78898e-05	7.16779e-05
MPZL1	158.825	-0.79448	0.222893	-3.56439	0.000364697	0.00120295
ADCY10	2.21751	3.19479	1.48615	2.14971	0.0315782	0.0662604
RP1-313L4.4	21.473	7.30089	1.08491	6.72947	1.70288e-11	1.30769e-10
RP1-313L4.3	2.36158	3.26162	1.46038	2.2334	0.0255226	0.0554066
MPC2	729.105	0.77482	0.193252	4.00938	6.08786e-05	0.000225358
TIPRL	1259.52	1.43399	0.198446	7.22606	4.97218e-13	4.34338e-12
RPL34P1	89.6636	2.96845	0.28032	10.5895	3.33387e-26	7.65788e-25
RP5-1059H15.1	10.731	4.81234	1.13247	4.24944	2.1431e-05	8.47679e-05
QRSL1P1	43.0707	8.30628	1.06975	7.76466	8.18637e-15	8.27203e-14
XCL2	12.431	-1.27888	0.573726	-2.22908	0.0258086	0.0559293
NA	NA	NA	NA	NA	NA	NA
LINC00626	7.645	2.29959	0.908812	2.53033	0.0113956	0.0273585
RPL29P7	4.73258	3.56765	1.22639	2.90906	0.00362519	0.00983179
ATP1B1	301.858	-0.605912	0.217588	-2.78468	0.00535813	0.013966
NME7	1088.75	2.25193	0.234982	9.58341	9.38888e-22	1.64807e-20
CCDC181	328.454	0.998202	0.232384	4.29548	1.74314e-05	6.99817e-05
C1orf112	484.657	1.34233	0.224233	5.98634	2.14614e-09	1.33961e-08
METTL18	115.795	-0.970488	0.271007	-3.58105	0.000342222	0.00113357
SCYL3	180.79	0.798693	0.247866	3.22228	0.00127175	0.00377803
KIFAP3	393.679	2.42719	0.249323	9.73513	2.1355e-22	3.90417e-21
MRPS10P1	19.8164	7.1883	1.10726	6.49199	8.47096e-11	6.09098e-10
ISCUP1	14.0705	6.68737	1.14053	5.86338	4.5354e-09	2.73831e-08
HAUS4P1	3.54403	4.70325	1.34225	3.50401	0.00045831	0.00148256
AL354732.1	1.75304	3.68136	1.64855	2.23308	0.0255435	0.0554475
GORAB	107	1.08497	0.314926	3.44516	0.000570718	0.00181588
RP1-79C4.4	3.22215	-2.70455	1.10592	-2.44552	0.0144643	0.0336769
RP5-1092L12.2	4.62636	5.08332	1.28496	3.956	7.62141e-05	0.000278085
FMO1	66.519	-1.52946	0.461586	-3.31349	0.000921406	0.00281747
FMO4	71.2387	1.14765	0.284014	4.04083	5.32619e-05	0.000198692
PRRC2C	1158.07	0.908248	0.203666	4.4595	8.21527e-06	3.45068e-05
PFN1P1	369.498	4.36237	0.289458	15.0708	2.52e-51	1.28619e-49
RPL4P3	397.222	-1.48784	0.565778	-2.62973	0.00854523	0.0211707
VAMP4	167.148	1.45307	0.240645	6.03823	1.55811e-09	9.87755e-09
RP4-560B9.4	10.2974	6.23957	1.14324	5.45778	4.82115e-08	2.61316e-07
RP4-612B18.1	9.41686	-2.75202	0.630239	-4.36663	1.26177e-05	5.16619e-05
DNM3	40.4348	0.844986	0.340837	2.47915	0.0131695	0.0310408
SLC25A38P1	37.8416	6.08183	0.907589	6.70108	2.06882e-11	1.57566e-10
GOT2P2	11.4391	5.64855	1.15609	4.8859	1.02956e-06	4.82884e-06
RP11-296O14.2	58.5954	8.75158	1.0855	8.06223	7.49158e-16	8.27482e-15
KLHL20	75.8443	1.49798	0.405111	3.69771	0.000217554	0.00074327
RP11-360D2.2	75.2674	-2.54729	0.256242	-9.94094	2.76205e-23	5.383e-22
DARS2	1602.57	2.39886	0.201141	11.9263	8.63421e-33	2.79686e-31
GAS5-AS1	1955.17	-4.11408	0.153628	-26.7796	5.58565e-158	1.49598e-155
GAS5	2102.65	-3.44736	0.144629	-23.8359	1.41855e-125	2.08207e-123
RABGAP1L	121.924	1.02357	0.310333	3.2983	0.000972715	0.00296146
RP4-809F4.1	22.5076	7.37214	1.12198	6.57062	5.01051e-11	3.6698e-10
NDUFAF4P4	42.128	7.54878	1.05757	7.13787	9.47887e-13	8.07647e-12
CACYBP	2218.29	-2.53727	0.149083	-17.0193	5.91214e-65	3.80177e-63
SDCCAG3P2	10.9784	4.85239	1.17799	4.1192	3.80194e-05	0.000144952
RP11-318C24.1	664.747	1.22584	0.157051	7.80541	5.93098e-15	6.09015e-14
RFWD2	45.5176	-1.86746	0.486055	-3.84208	0.000121996	0.000432261
RP11-195C7.2	3.10506	2.90639	1.37825	2.10876	0.0349654	0.0723484
RP11-195C7.3	4.62776	3.51736	1.23278	2.85319	0.00432833	0.0115495
RP4-765C7.2	40.5125	4.39626	0.545438	8.06006	7.62589e-16	8.41959e-15
RALGPS2	43.8729	0.766403	0.382344	2.00449	0.0450181	0.0897081
PTPN2P1	61.1812	5.01764	0.560951	8.94487	3.72379e-19	5.36849e-18
FAM20B	84.8593	-1.03005	0.319603	-3.2229	0.00126899	0.00377154
ABL2	41.3016	-1.51918	0.455358	-3.33624	0.000849213	0.00261425
SNORA67	2681.83	-0.872224	0.163042	-5.34969	8.81074e-08	4.65421e-07
COX5BP8	2.66284	4.28407	1.40868	3.0412	0.00235633	0.00664372
SOAT1	429.032	1.94875	0.261991	7.43824	1.02035e-13	9.4772e-13
MEF2AP1	4.33449	4.99058	1.27514	3.91376	9.08699e-05	0.000327785
HNRNPA1P54	5.00012	5.19953	1.24043	4.19171	2.76862e-05	0.000107771
TDRD5	3.99973	4.10034	1.58385	2.58884	0.00962993	0.0235482
TOR1AIP1	339.198	1.01386	0.226497	4.47628	7.59539e-06	3.20638e-05
CEP350	58.6476	-0.824197	0.349134	-2.36069	0.018241	0.0413141
QSOX1	94.5171	0.533318	0.245422	2.17307	0.0297752	0.0630919
LHX4	9.97225	-1.36759	0.551946	-2.47776	0.0132209	0.0311393
RP5-1180C10.2	5.36554	-1.9472	0.781969	-2.49012	0.0127701	0.0302088
ACBD6	382.201	1.11519	0.18966	5.87992	4.10454e-09	2.48849e-08
VDAC1P4	2.01016	3.89348	1.53255	2.54053	0.0110685	0.02666
XPR1	101.871	1.07265	0.304548	3.52212	0.000428105	0.00139335
STX6	68.1994	0.666009	0.25748	2.58664	0.00969164	0.023679
IER5	45.7143	-1.36838	0.397764	-3.44018	0.000581317	0.00184667
RP11-416K24.2	1289.95	7.96171	0.346392	22.9847	6.63604e-117	8.6632e-115
NPL	89.4865	1.35077	0.277125	4.87424	1.09228e-06	5.10919e-06
DHX9	505.38	-1.85881	0.363726	-5.11046	3.21375e-07	1.60004e-06
RGL1	19.0534	2.55408	0.584152	4.37228	1.22955e-05	5.04221e-05
C1orf21	210.901	1.12142	0.225657	4.96955	6.71068e-07	3.2124e-06
GS1-115G20.2	9.71077	6.15453	1.17866	5.22164	1.77341e-07	9.09426e-07
EDEM3	29.7806	-1.17504	0.491095	-2.3927	0.0167248	0.0382745
RNF2	106.109	-0.649516	0.227084	-2.86024	0.00423323	0.0113098
TRMT1L	74.144	0.911839	0.376693	2.42064	0.0154933	0.0357639
SWT1	55.116	0.628221	0.319258	1.96775	0.0490965	0.0965823
RPL5P5	491.091	3.37936	0.214503	15.7544	6.40962e-56	3.58098e-54
IVNS1ABP	271.77	1.40346	0.235849	5.9507	2.66995e-09	1.65149e-08
PRG4	102.789	-2.1037	0.401141	-5.2443	1.56875e-07	8.0862e-07
C1orf27	330.934	1.97982	0.239372	8.27091	1.32941e-16	1.56597e-15
PLA2G4A	165.908	2.77936	0.347639	7.99497	1.29601e-15	1.40463e-14
FDPSP1	663.043	10.2265	0.860806	11.8801	1.50191e-32	4.81112e-31
RP11-393M18.4	1.37249	3.33395	1.67898	1.9857	0.0470665	0.093154
RP5-925F19.1	38.2835	8.13546	1.07092	7.59669	3.03793e-14	2.93392e-13
RP11-113I24.1	11.1289	6.35543	1.12373	5.65564	1.55263e-08	8.8553e-08
RP11-142L4.3	41.2643	1.14696	0.328579	3.49067	0.000481805	0.00155296
MIR4426	40814.5	-0.864038	0.141269	-6.11625	9.58031e-10	6.19892e-09
RP3-419C19.2	66.2148	8.20271	1.05201	7.79721	6.32895e-15	6.47067e-14
UCHL5	637.444	1.2901	0.178155	7.24148	4.43817e-13	3.89393e-12
RP11-101E13.5	40.1153	-1.63779	0.381734	-4.2904	1.78352e-05	7.14923e-05
CDC73	155.777	1.93969	0.287887	6.73768	1.60941e-11	1.23994e-10
EEF1A1P14	2.15469	3.11712	1.44959	2.15035	0.0315275	0.0661753
RP11-489C13.1	153.108	10.1369	1.04846	9.66837	4.10866e-22	7.3461e-21
KCNT2	17.3731	1.97751	0.696716	2.83833	0.00453508	0.0120356
ZBTB41	54.7738	1.447	0.410294	3.52673	0.000420721	0.00137259
CRB1	7.49641	-1.77145	0.664335	-2.66651	0.00766441	0.0192548
RP11-332L8.1	136.497	9.97201	1.06626	9.35236	8.57099e-21	1.39253e-19
MRPS21P3	26.8208	6.89227	1.07551	6.40835	1.47101e-10	1.03385e-09
DENND1B	251.009	3.4602	0.235089	14.7187	4.88931e-49	2.38758e-47
RP11-448G4.2	267.031	2.65047	0.217458	12.1885	3.58139e-34	1.22261e-32
FAM204BP	82.802	6.79924	0.770667	8.82254	1.11896e-18	1.56036e-17
LHX9	4.84876	-2.72356	0.984519	-2.76639	0.00566803	0.0146707
NEK7	48.2196	-1.75769	0.477237	-3.68305	0.00023046	0.000783552
RP11-16L9.1	28.0643	1.52977	0.471413	3.24508	0.00117417	0.00351546
RP11-2L13.1	2.14371	3.9679	1.58449	2.50421	0.0122725	0.0291941
ZNF281	31.7576	-1.86095	0.427136	-4.35682	1.31967e-05	5.38799e-05
DDX59	112.887	0.81319	0.303405	2.68021	0.0073576	0.0185648
CAMSAP2	50.082	-1.38025	0.428182	-3.22351	0.0012663	0.00376442
RPL34P6	3467.57	3.80527	0.148617	25.6045	1.36002e-144	2.73891e-142
C1orf106	6.37268	-1.64082	0.69344	-2.36621	0.0179715	0.0407935
TMEM9	1743.53	1.38683	0.215343	6.44012	1.19382e-10	8.4623e-10
PHLDA3	40.5084	-1.74323	0.417005	-4.18037	2.91041e-05	0.000112951
RPS10P7	24.4257	-0.841242	0.412693	-2.03842	0.0415079	0.0838649
RP11-134G8.6	24.4257	-0.841242	0.412693	-2.03842	0.0415079	0.0838649
IPO9	555.934	1.36109	0.218728	6.22277	4.88462e-10	3.26298e-09
RP11-465N4.2	35.1072	-2.58513	0.541688	-4.77237	1.82073e-06	8.29111e-06
RP11-465N4.5	22.2642	-1.82049	0.406185	-4.48193	7.39701e-06	3.12925e-05
RP11-510N19.2	18.0723	6.31996	1.1045	5.72203	1.05261e-08	6.12856e-08
GPR37L1	55.8696	-1.39489	0.286935	-4.86136	1.16583e-06	5.43364e-06
ARL8A	60.2004	-1.28205	0.294241	-4.35713	1.31778e-05	5.38109e-05
RP11-175B9.3	48045.9	-0.987593	0.158866	-6.21652	5.08296e-10	3.38851e-09
KDM5B	56.2498	0.742352	0.354261	2.09549	0.0361271	0.074476
RP11-480I12.2	6193.02	2.70622	0.148441	18.2309	2.9347e-74	2.17209e-72
RABIF	283.724	-0.592665	0.189556	-3.12659	0.00176848	0.00510142
KLHL12	49.2396	-1.05679	0.317498	-3.32848	0.000873217	0.00267989
ADIPOR1	492.62	0.925835	0.239171	3.87102	0.00010838	0.000387236
TMEM183A	156.678	-2.24722	0.382883	-5.8692	4.3791e-09	2.64692e-08
BTG2	94.2619	-1.12496	0.222236	-5.06203	4.14814e-07	2.03983e-06
ATP2B4	42.6625	-1.44181	0.362362	-3.97892	6.92296e-05	0.000254028
RP11-90O23.1	113.952	8.9871	1.0556	8.51375	1.68394e-17	2.14237e-16
ZC3H11A	174.068	-1.08358	0.239427	-4.52571	6.01931e-06	2.57663e-05
ZBED6	26.9954	-2.21032	0.503175	-4.39275	1.11926e-05	4.61545e-05
RP11-397P13.7	53.2583	7.88659	1.05223	7.49508	6.62557e-14	6.23644e-13
SNRPE	6024.24	-3.03893	0.128182	-23.708	2.98051e-124	4.35004e-122
CBX1P3	1.59802	3.55581	1.57807	2.25327	0.0242424	0.0530129
RP11-203F10.1	67.0174	8.94747	1.04944	8.52592	1.51603e-17	1.93538e-16
PLEKHA6	8.6514	-1.22211	0.613753	-1.99121	0.0464575	0.0920398
RP11-203F10.6	683.478	1.58164	0.153662	10.293	7.57893e-25	1.59427e-23
RP11-739N20.2	76.9539	-0.946892	0.292524	-3.23697	0.00120805	0.0036086
RP11-739N20.3	719.768	8.22204	0.436227	18.8481	3.04805e-79	2.46683e-77
PPP1R15B	155.46	-0.670649	0.252951	-2.6513	0.00801835	0.020049
PIK3C2B	38.2667	-0.99003	0.411355	-2.40675	0.0160951	0.0369638
RP11-430C7.2	39.0173	7.43673	1.09664	6.78135	1.19056e-11	9.28258e-11
LRRN2	3.37839	-5.82434	1.38855	-4.19455	2.73414e-05	0.000106492
RBBP5	103.707	1.16111	0.330346	3.51482	0.00044005	0.00142865
RP11-383G10.1	4.0368	4.08702	1.27992	3.19318	0.00140714	0.00414375
SNRPGP10	7215.01	-1.15187	0.13561	-8.49403	1.99586e-17	2.51946e-16
MFSD4	9.27734	1.24772	0.624646	1.99748	0.0457731	0.0908851
RP11-6B6.3	15.8666	2.12516	0.551854	3.85095	0.00011766	0.000418036
NUCKS1	1317	-0.551236	0.160802	-3.42804	0.000607965	0.00192005
AC119673.1	399.9	-2.09515	0.342861	-6.11077	9.91506e-10	6.40595e-09
SLC41A1	55.2967	-0.945805	0.288572	-3.27754	0.00104718	0.00316775
RP11-312O7.2	12.4546	2.10436	0.654869	3.21341	0.00131168	0.00388377
SNORD60	64.3579	-2.41101	0.280413	-8.59808	8.10587e-18	1.06033e-16
RP11-421E17.4	35.988	5.5707	0.828376	6.72485	1.75774e-11	1.34783e-10
EIF2D	869.372	2.61187	0.235533	11.0892	1.4152e-28	3.7062e-27
MAPKAPK2	25.7336	-1.59585	0.507682	-3.1434	0.00166997	0.00484198
RP11-343H5.4	54.3965	1.25573	0.292649	4.2909	1.77947e-05	7.1341e-05
YOD1	40.4658	-1.32489	0.315515	-4.19914	2.67934e-05	0.000104499
RP11-164O23.5	3.0205	2.86278	1.35567	2.11171	0.0347116	0.0718945
CD55	376.137	1.71361	0.231206	7.41163	1.24759e-13	1.14405e-12
CD46P1	36.6038	2.58222	0.473405	5.45458	4.90899e-08	2.65689e-07
CD46	421.342	1.32164	0.257893	5.12476	2.97924e-07	1.48727e-06
RP11-2P2.1	3.26067	4.58596	1.36705	3.35463	0.00079471	0.00245871
ATP5G2P1	3181.13	6.3606	0.209417	30.3728	1.25531e-202	5.09558e-200
TRAF3IP3	40.484	-1.07927	0.3448	-3.13014	0.00174724	0.00504631
C1orf74	47.3831	-0.994023	0.353459	-2.81227	0.00491929	0.0129455
DIEXF	249.006	0.907199	0.220572	4.11293	3.90661e-05	0.000148681
SERTAD4	10.7141	-1.89014	0.745161	-2.53656	0.0111948	0.0269362
HHAT	34.2818	2.34226	0.460327	5.08824	3.61398e-07	1.78765e-06
RNU5A-8P	4.40052	-1.92452	0.89108	-2.15976	0.0307913	0.0648951
IPO8P1	38.5214	4.16567	0.548201	7.59881	2.9887e-14	2.89175e-13
RP11-543B16.1	237.075	-3.02603	0.242303	-12.4886	8.61299e-36	3.10774e-34
RP11-543B16.2	531.399	-1.27289	0.275702	-4.61692	3.89476e-06	1.70656e-05
RCOR3	114.679	1.12475	0.291984	3.85211	0.000117107	0.000416356
ARPC3P2	7.24513	3.61182	1.01112	3.57209	0.000354147	0.00116994
SLC30A1	22.2772	-1.51087	0.599338	-2.5209	0.0117054	0.0279963
FDPSP8	150.245	10.1102	1.05271	9.60402	7.68856e-22	1.35878e-20
NEK2	80.4068	-1.04019	0.251605	-4.13421	3.56175e-05	0.000136355
LPGAT1	80.3132	-1.5707	0.334342	-4.69789	2.62868e-06	1.17438e-05
RP11-565J7.1	3.91539	-1.99432	0.992222	-2.00996	0.0444356	0.0887313
INTS7	319.203	1.76411	0.252129	6.99685	2.61789e-12	2.15222e-11
DTL	329.552	1.70122	0.256269	6.63841	3.17086e-11	2.37053e-10
RPL21P28	41596.3	-0.533682	0.170163	-3.13629	0.001711	0.00495044
RP11-384C4.3	2998.78	-3.90853	0.147358	-26.524	5.12518e-155	1.30536e-152
TMEM206	284.996	1.32067	0.219798	6.00858	1.87153e-09	1.17782e-08
ATF3	40.0737	0.905143	0.406453	2.22693	0.025952	0.056184
NSL1	701.3	0.91287	0.209319	4.36115	1.29383e-05	5.28665e-05
TATDN3	536.556	1.58561	0.195827	8.09701	5.63274e-16	6.28848e-15
FLVCR1-AS1	14.3305	-1.05533	0.475038	-2.22157	0.0263126	0.0568284
FLVCR1	54.6194	-0.91869	0.326175	-2.81655	0.00485418	0.0127884
VASH2	21.2233	-1.30475	0.422273	-3.08982	0.0020028	0.00571153
RPS6KC1	39.8369	0.984502	0.48441	2.03238	0.0421157	0.0848289
SMYD2	303.857	1.53464	0.185966	8.25225	1.55436e-16	1.81896e-15
PTPN14	42.1152	-0.965381	0.310497	-3.10914	0.0018763	0.00537841
CENPF	203.597	-0.612647	0.187273	-3.27141	0.00107014	0.00323158
KCTD3	88.5329	-0.790387	0.357095	-2.21338	0.0268713	0.0578368
SPATA17	18.5842	1.85259	0.666585	2.77923	0.00544888	0.0141741
TGFB2	5.49737	3.18366	1.19462	2.66501	0.00769865	0.019324
RP11-135J2.4	353.335	-1.54154	0.197538	-7.80373	6.01056e-15	6.16213e-14
LYPLAL1	726.155	0.635982	0.17731	3.58683	0.000334722	0.00110958
EPRS	1189.88	2.00061	0.195339	10.2417	1.28921e-24	2.68583e-23
BPNT1	809.161	1.32604	0.221236	5.99376	2.05048e-09	1.28453e-08
IARS2	615.222	1.61236	0.166263	9.69766	3.08497e-22	5.58498e-21
RAB3GAP2	201.242	2.06182	0.281091	7.33506	2.2162e-13	1.99221e-12
MORF4L1P1	1357.44	-1.03754	0.150721	-6.88383	5.82632e-12	4.66447e-11
AURKAPS1	119.097	5.85734	0.531852	11.0131	3.30391e-28	8.51512e-27
RP11-410C4.1	1.09948	-4.21326	1.87037	-2.25264	0.0242821	0.0530864
SLMO2P1	9.73145	6.15934	1.14358	5.38602	7.2035e-08	3.83876e-07
HDAC1P2	23.9503	5.99311	1.0872	5.51244	3.53886e-08	1.9497e-07
C1orf115	37.7974	-1.55492	0.325563	-4.77611	1.78721e-06	8.14703e-06
MARC1	84.2307	-1.17474	0.365428	-3.21469	0.00130588	0.00386922
RNU6ATAC35P	2.78299	-2.57459	1.11108	-2.3172	0.0204931	0.0457183
QRSL1P2	2.90134	4.42418	1.48124	2.98681	0.00281904	0.00781265
TAF1A	83.8633	1.25034	0.351856	3.55356	0.00038005	0.00124868
RP11-378J18.3	32.4381	-1.40509	0.344298	-4.08102	4.48391e-05	0.00016892
RP11-378J18.6	622.992	11.4408	1.03963	11.0046	3.63063e-28	9.33862e-27
RP11-378J18.8	23.7587	-1.0773	0.3795	-2.83874	0.00452925	0.0120225
AIDA	146.455	-1.72623	0.205526	-8.39907	4.50038e-17	5.52791e-16
BROX	256.766	0.604953	0.279021	2.16813	0.0301489	0.0637556
FAM177B	155.376	2.4369	0.227891	10.6933	1.09436e-26	2.60114e-25
DISP1	182.698	-1.26031	0.221093	-5.70037	1.19549e-08	6.92941e-08
CAPN8	6.93134	-1.50506	0.681488	-2.20849	0.02721	0.0584446
PHBP11	1086.39	8.52382	0.438971	19.4177	5.46554e-84	4.68612e-82
ACTBP11	5.89702	2.07622	0.912902	2.27431	0.0229476	0.0505088
RP11-504P24.8	26.0999	-1.08591	0.370999	-2.927	0.00342251	0.00932105
RP11-504P24.2	20.891	-1.00202	0.496766	-2.01708	0.0436871	0.0874583
RP11-504P24.5	14.843	3.00164	0.636082	4.71894	2.37071e-06	1.06642e-05
FBXO28	81.3306	-0.503443	0.232848	-2.16211	0.0306095	0.0645562
RP11-365O16.1	510.789	-0.913758	0.206133	-4.43287	9.29883e-06	3.88071e-05
DEGS1	1674.64	-0.714641	0.189704	-3.76714	0.00016513	0.000574361
RP11-365O16.6	107.662	-1.09191	0.209412	-5.2142	1.84616e-07	9.44867e-07
NVL	593.47	2.49246	0.237027	10.5155	7.32851e-26	1.6441e-24
WDR26	199.144	-0.850081	0.303207	-2.80363	0.00505308	0.0132546
AKR1B1P1	301.735	11.1164	1.04952	10.5919	3.24921e-26	7.47664e-25
RP11-100E13.1	55.6706	-2.45821	0.30808	-7.97914	1.47354e-15	1.58776e-14
DNAH14	299.936	0.751697	0.185999	4.04141	5.31305e-05	0.000198316
LBR	732.813	1.29072	0.234697	5.49953	3.80812e-08	2.09068e-07
ENAH	210.792	-1.26861	0.320787	-3.95467	7.664e-05	0.000279521
SRP9	3649.01	-1.46015	0.181716	-8.03533	9.33307e-16	1.02478e-14
EPHX1	193.884	1.60624	0.227042	7.07462	1.49854e-12	1.25461e-11
TMEM63A	161.824	1.07225	0.289425	3.70476	0.00021159	0.000724802
NDUFA3P3	23.1198	4.59236	0.757385	6.06343	1.33245e-09	8.50299e-09
SDE2	133.787	1.09351	0.26091	4.19113	2.77565e-05	0.000107996
H3F3A	9696.9	-4.98529	0.525553	-9.4858	2.40527e-21	4.07609e-20
RP11-396C23.3	5.25973	2.21244	0.910871	2.42892	0.0151437	0.0350327
ACBD3	82.7731	-0.840791	0.404364	-2.07929	0.0375904	0.0769673
LIN9	364.826	1.60336	0.25984	6.17054	6.80556e-10	4.47599e-09
PARP1	1026.43	-1.9159	0.308018	-6.22009	4.96869e-10	3.31488e-09
RP11-118H4.1	9.08616	3.9692	1.14064	3.47981	0.000501768	0.0016117
CDKN2AIPNLP1	87.8126	4.93782	0.463833	10.6457	1.82627e-26	4.27045e-25
ITPKB	18.9045	-1.49326	0.548415	-2.72286	0.00647199	0.016533
PSEN2	74.0034	0.759884	0.287928	2.63914	0.00831159	0.0206648
ADCK3	169.437	-0.647946	0.249893	-2.59289	0.00951728	0.0233026
RP11-211A18.1	7.21656	5.73664	1.19221	4.81175	1.49616e-06	6.89529e-06
CTD-2090I13.1	91.4822	0.999794	0.470517	2.12488	0.0335963	0.0699301
CTD-2090I13.2	53.1343	5.12607	0.584957	8.76316	1.89852e-18	2.59997e-17
BTF3P9	140.965	0.933457	0.295638	3.15743	0.00159166	0.00463199
SNAP47	339.262	-0.687661	0.150155	-4.57967	4.6571e-06	2.0215e-05
JMJD4	201.523	-1.41154	0.194923	-7.24153	4.43638e-13	3.89367e-12
ARF1	890.594	-0.691926	0.147148	-4.70224	2.57318e-06	1.15137e-05
MIR3620	153.608	5.21074	0.411581	12.6603	9.81243e-37	3.63648e-35
C1orf35	144.622	-1.09722	0.239999	-4.57178	4.8361e-06	2.09605e-05
MRPL55	751.015	-0.75223	0.146424	-5.13734	2.78648e-07	1.39695e-06
FAM96AP2	74.3433	7.64788	1.0448	7.31993	2.481e-13	2.22332e-12
IBA57-AS1	1.55219	-3.91731	1.79461	-2.18281	0.0290494	0.0617877
IBA57	33.788	-1.43582	0.387975	-3.70081	0.000214914	0.000735121
TRIM11	68.9807	-1.62849	0.379339	-4.29296	1.76306e-05	7.07061e-05
RP11-245P10.8	18.5637	-1.14226	0.573986	-1.99006	0.0465846	0.0922707
HIST3H2A	53.7178	-0.888498	0.309708	-2.86883	0.00411994	0.0110319
HIST3H2BB	13.5544	-1.96208	0.537546	-3.65006	0.000262177	0.000884097
RNF187	252.783	-0.795494	0.240163	-3.31231	0.000925281	0.00282765
RNA5S1	40.0835	-2.1993	0.367796	-5.97968	2.23572e-09	1.39318e-08
RNA5S2	44.3223	-2.02272	0.426152	-4.74647	2.06995e-06	9.36619e-06
RNA5S3	39.5152	-2.15133	0.361261	-5.95505	2.59991e-09	1.6097e-08
RNA5S4	37.254	-1.61149	0.390857	-4.12296	3.74035e-05	0.000142772
RNA5S5	41.3889	-1.833	0.370627	-4.94567	7.58837e-07	3.61059e-06
RNA5S6	41.9895	-1.95188	0.379652	-5.14124	2.72926e-07	1.36959e-06
RNA5S7	42.827	-1.92258	0.351197	-5.47436	4.39106e-08	2.39453e-07
RNA5S8	40.349	-2.12438	0.36826	-5.7687	7.98835e-09	4.71229e-08
RNA5S10	41.4183	-1.70145	0.340869	-4.99152	5.99073e-07	2.8912e-06
RNA5S11	44.2697	-1.97763	0.389869	-5.07254	3.92534e-07	1.93357e-06
RNA5S12	41.7527	-2.04336	0.349272	-5.85034	4.90557e-09	2.95072e-08
RNA5S13	44.8578	-2.15642	0.344075	-6.26728	3.67414e-10	2.48052e-09
RNA5S14	45.1044	-2.11892	0.359011	-5.9021	3.58898e-09	2.19126e-08
RNA5S15	41.1508	-2.13119	0.382938	-5.56536	2.61614e-08	1.46035e-07
RNA5S16	41.8352	-1.68516	0.376713	-4.47332	7.70159e-06	3.24752e-05
RNA5S17	39.9897	-1.88198	0.380838	-4.94168	7.74526e-07	3.68187e-06
RHOU	14.663	-1.36145	0.651441	-2.0899	0.0366266	0.0753383
RP5-1061H20.3	85.3411	-0.895956	0.297706	-3.00953	0.00261653	0.00729032
RAB4A	384.223	1.14961	0.200466	5.7347	9.76863e-09	5.7106e-08
SPHAR	96.1663	-0.947917	0.257054	-3.68762	0.000226362	0.000771334
CCSAP	44.281	-2.10302	0.512053	-4.10705	4.00753e-05	0.00015221
RP5-1068B5.1	1.85317	-4.96255	1.6179	-3.06729	0.00216011	0.00612102
ACTA1	4.35616	-1.99393	0.870463	-2.29066	0.0219833	0.0486295
NUP133	523.623	1.26787	0.217159	5.83845	5.26895e-09	3.16113e-08
ABCB10	65.2987	-1.53129	0.365687	-4.18745	2.82109e-05	0.000109649
HMGN2P19	19.0699	-1.81689	0.485349	-3.74347	0.000181498	0.000628265
TAF5L	55.343	-1.27024	0.346561	-3.66526	0.000247086	0.000837232
URB2	138.731	-0.793732	0.280603	-2.82866	0.0046743	0.0123647
RP11-108F13.2	7.56155	3.68128	1.00461	3.66438	0.00024794	0.000839797
RP5-956O18.3	34.9359	-1.9659	0.462562	-4.25002	2.13751e-05	8.45726e-05
RP11-543E8.2	13.7795	4.15975	0.936268	4.44291	8.87499e-06	3.71397e-05
COG2	697.113	2.48293	0.259892	9.55369	1.25153e-21	2.17337e-20
C1orf198	58.1251	-1.67978	0.297912	-5.63853	1.7151e-08	9.75834e-08
ARV1	804.038	0.995133	0.211139	4.71317	2.43887e-06	1.09486e-05
FAM89A	54.3286	-1.49575	0.366845	-4.07734	4.55538e-05	0.000171464
MIR1182	13.9511	-1.98846	0.565283	-3.51763	0.00043542	0.00141521
RP11-423F24.3	69.5475	4.8156	0.507329	9.49207	2.26486e-21	3.85322e-20
GNPAT	638.002	1.41753	0.212733	6.66339	2.6758e-11	2.01258e-10
EXOC8	34.4222	-0.935229	0.427799	-2.18614	0.0288053	0.0613487
SPRTN	173.16	0.63294	0.24637	2.56906	0.0101975	0.024745
EGLN1	82.1512	-0.795908	0.383055	-2.07779	0.0377284	0.0772195
TSNAX-DISC1	339.98	1.10612	0.231735	4.77319	1.81331e-06	8.25877e-06
TSNAX	467.501	0.858285	0.190625	4.50247	6.71679e-06	2.85497e-05
NTPCR	2102.17	0.634527	0.198577	3.19537	0.0013965	0.00411569
RPS7P3	1948.27	-1.94464	0.307601	-6.32198	2.58237e-10	1.76825e-09
MLK4	57.6068	-1.2024	0.32858	-3.65938	0.000252826	0.000854895
RP11-301G21.1	281.703	9.57389	1.02553	9.33551	1.00507e-20	1.6238e-19
RP5-827C21.1	8374.46	-4.77698	0.14822	-32.229	6.91859e-228	3.52427e-225
RP5-827C21.2	8278.14	-4.86007	0.152055	-31.9626	3.6156e-224	1.67732e-221
RP5-827C21.6	2.79169	-2.92583	1.18905	-2.46065	0.0138685	0.0324967
RP5-827C21.4	1780.12	-2.12589	0.162335	-13.0957	3.48625e-39	1.40417e-37
COA6	2773.78	-0.524086	0.147003	-3.56514	0.000363668	0.00120002
IRF2BP2	184.99	-1.55041	0.640788	-2.41954	0.01554	0.0358601
RP4-781K5.2	48.5457	-1.75069	0.446076	-3.92464	8.68587e-05	0.000314145
TOMM20	1812.13	-1.7949	0.140651	-12.7614	2.69411e-37	1.01582e-35
SNORA14B	4.7536	-2.8674	0.940894	-3.04752	0.00230736	0.0065134
RBM34	1912.56	1.09705	0.208036	5.27339	1.33929e-07	6.95171e-07
ARID4B	2054	0.979399	0.202644	4.83311	1.34416e-06	6.22904e-06
TBCE	1100.36	1.53874	0.195096	7.88708	3.09331e-15	3.23645e-14
TBCE-AS1	163.625	-1.32169	0.25617	-5.15941	2.47732e-07	1.25089e-06
LYST	90.5393	0.703861	0.272713	2.58096	0.00985268	0.0240115
LDHAP2	34.195	2.77136	0.443394	6.25034	4.09571e-10	2.75155e-09
NID1	137.698	-1.19281	0.324683	-3.67378	0.000238992	0.000811816
RP4-764D2.1	72.2143	8.32907	1.05856	7.86827	3.59565e-15	3.74995e-14
RP11-478H16.1	344.874	9.8668	1.0321	9.55996	1.17806e-21	2.04988e-20
EDARADD	3742.63	6.75196	0.246556	27.3851	4.12611e-165	1.20441e-162
ENO1P1	3725.1	7.08095	0.257483	27.5006	1.7255e-166	5.09395e-164
LGALS8	182.203	-2.01551	0.369616	-5.45299	4.95299e-08	2.68015e-07
RP11-385F5.4	21.6512	-2.15335	0.42214	-5.10103	3.37802e-07	1.67668e-06
MTR	130.795	-0.906372	0.246101	-3.68293	0.000230565	0.000783806
RPL35P1	11530.2	3.78254	0.142976	26.4558	3.12582e-154	7.88405e-152
RP11-193H5.1	12.2097	2.14658	0.631665	3.39829	0.000678073	0.00212288
RP11-193H5.2	12.2097	2.14658	0.631665	3.39829	0.000678073	0.00212288
MIPEPP2	2.3588	4.11395	1.44347	2.85005	0.00437129	0.0116486
RPS7P5	1.70323	-4.8334	1.68651	-2.86592	0.00415803	0.0111225
RP11-567G24.1	181.943	2.16671	0.199532	10.8589	1.80819e-27	4.50816e-26
ADH5P3	7.67596	2.29275	0.773528	2.96402	0.00303652	0.00836983
GREM2	2.91692	-2.15229	1.09487	-1.96579	0.0493224	0.0969983
RP11-467I20.3	18.2179	1.80139	0.469883	3.8337	0.000126233	0.000446115
RP11-527D7.1	2.42163	-3.23271	1.34344	-2.40629	0.0161154	0.037004
FH	857.009	1.55308	0.211261	7.35148	1.96025e-13	1.77317e-12
CHML	41.0694	-1.22451	0.366601	-3.34018	0.000837248	0.00257895
EXO1	445.263	1.97191	0.231105	8.5325	1.43218e-17	1.83104e-16
CFL1P4	3.44506	4.65172	1.39548	3.33342	0.000857852	0.00263741
RP11-331N16.1	28.4639	-0.691463	0.347104	-1.99209	0.0463613	0.0918758
RP11-261C10.7	7.88943	-2.9678	0.745621	-3.98031	6.8826e-05	0.000252618
CEP170	126.689	0.546789	0.244955	2.23221	0.0256014	0.0555638
SDCCAG8	318.354	1.11038	0.208838	5.31692	1.05541e-07	5.52901e-07
FCF1P7	12.2963	4.40447	0.970309	4.53924	5.64574e-06	2.42431e-05
AKT3	139.129	-0.559523	0.221493	-2.52614	0.0115323	0.0276382
ZBTB18	39.3952	-1.85324	0.431253	-4.29734	1.72863e-05	6.94418e-05
RP11-518L10.5	131.705	-0.984827	0.215582	-4.56822	4.91886e-06	2.12943e-05
ADSS	177.025	-0.771341	0.253858	-3.03848	0.00237776	0.00669687
DESI2	84.3017	-1.40053	0.36098	-3.8798	0.00010454	0.000374239
RP11-173A6.2	225.417	3.53236	0.227783	15.5076	3.08181e-54	1.66104e-52
COX20	606.641	-3.24387	0.196077	-16.5439	1.77156e-61	1.07031e-59
HNRNPU-AS1	1287.55	-2.40948	0.282677	-8.52381	1.54394e-17	1.97004e-16
HNRNPU	1155.6	-1.23063	0.318536	-3.86339	0.000111823	0.00039877
RP11-156E8.1	59.1541	-2.18383	0.292632	-7.46271	8.47604e-14	7.92368e-13
SMYD3	324.787	1.4607	0.200425	7.28802	3.1455e-13	2.7947e-12
TFB2M	100.833	-0.593801	0.253792	-2.33972	0.0192984	0.0433959
CNST	32.2603	1.00483	0.438119	2.2935	0.0218192	0.0483116
RP11-452J6.2	68.3709	4.48858	1.06384	4.21923	2.45141e-05	9.62303e-05
SCCPDH	337.395	1.88785	0.238497	7.91559	2.4608e-15	2.59578e-14
RP11-397A15.4	8.79683	5.27029	1.14992	4.58316	4.57991e-06	1.99066e-05
AHCTF1	32.3125	-2.02838	0.431309	-4.70284	2.56563e-06	1.14839e-05
ZNF670	217.843	1.32058	0.19559	6.7518	1.46022e-11	1.12902e-10
ZNF695	240.252	1.65303	0.195572	8.45231	2.85604e-17	3.56374e-16
RP11-551G24.2	219.985	9.21749	1.04	8.863	7.78871e-19	1.0985e-17
RP11-488L18.8	10.7912	-1.09496	0.544007	-2.01277	0.0441389	0.0882202
HSD17B7P1	53.7145	8.62614	1.06864	8.07208	6.91132e-16	7.65995e-15
AL672296.1	4.88244	5.16694	1.24314	4.15635	3.23377e-05	0.000124533
AL672183.2	184.225	1.32596	0.227994	5.81575	6.03621e-09	3.59667e-08
SH3YL1	117.049	1.6383	0.329637	4.97	6.69525e-07	3.2056e-06
ACP1	4476.8	0.652261	0.188387	3.46235	0.000535488	0.0017126
AC092159.2	501.712	-1.18062	0.215107	-5.48849	4.05385e-08	2.21902e-07
PXDN	11.4569	-1.78722	0.56861	-3.14314	0.00167144	0.00484571
TSSC1	587.238	2.28375	0.210365	10.8561	1.86518e-27	4.63246e-26
RP11-1293J14.1	12.0002	-1.0613	0.514539	-2.06262	0.0391485	0.0797302
ADI1	1267.65	1.12107	0.193299	5.79965	6.64546e-09	3.94702e-08
RP13-512J5.1	205.308	-0.650292	0.216691	-3.00101	0.00269088	0.00747902
RNASEH1	236.598	-0.689777	0.211193	-3.2661	0.00109041	0.00328627
RNASEH1-AS1	324.197	-2.8568	0.168459	-16.9585	1.6663e-64	1.06361e-62
RPS7	26509	-6.57479	0.282665	-23.26	1.12662e-119	1.5165e-117
SNORA73	32.2744	-1.01607	0.414564	-2.45095	0.0142481	0.0332481
TMSB4XP2	2.49293	-2.82021	1.27398	-2.2137	0.0268493	0.0578123
RNF144A-AS1	144.449	-0.729315	0.214651	-3.39768	0.000679599	0.00212714
ID2	765.218	-0.711226	0.203144	-3.5011	0.000463343	0.00149754
KIDINS220	193.117	1.78183	0.243814	7.30814	2.7086e-13	2.41893e-12
RPL30P3	28.9964	6.27779	1.05923	5.92675	3.08983e-09	1.89855e-08
RP11-385J23.1	946.917	4.40443	0.233481	18.8642	2.24514e-79	1.83417e-77
ITGB1BP1	843.564	0.855862	0.149452	5.72667	1.02423e-08	5.97541e-08
CPSF3	2931.79	2.97957	0.213334	13.9667	2.49036e-44	1.11739e-42
IAH1	2379.23	1.28135	0.192605	6.65274	2.87693e-11	2.15575e-10
TAF1B	727.413	2.48004	0.233212	10.6343	2.06407e-26	4.81784e-25
RP11-254F7.2	6.31072	-1.66885	0.696667	-2.39547	0.0165991	0.038007
RP11-254F7.4	5.42136	-1.97374	0.828243	-2.38305	0.0171699	0.0391622
ODC1	312.553	-1.55753	0.391555	-3.97781	6.95543e-05	0.000255111
SNORA80B	6.03105	-2.74782	0.945517	-2.90616	0.00365898	0.00991308
NOL10	493.118	2.57361	0.278676	9.23513	2.57972e-20	4.0203e-19
AC092687.5	74.0862	-0.664753	0.278627	-2.38582	0.0170412	0.0389062
PDIA6	5076.98	2.39364	0.182808	13.0937	3.57547e-39	1.43788e-37
PQLC3	46.9564	1.56532	0.405119	3.86385	0.000111615	0.000398083
AC018463.4	5.80077	-1.81276	0.777573	-2.33131	0.0197372	0.0442754
E2F6	51.8624	-1.58103	0.43323	-3.64939	0.000262862	0.000886178
AC099344.1	4.59384	-2.4708	1.05562	-2.34063	0.0192514	0.0433048
RN7SL674P	44.2488	-1.06959	0.397553	-2.69044	0.00713578	0.018056
NBAS	79.4947	1.64281	0.315819	5.20175	1.97422e-07	1.00644e-06
DDX1	2419.03	2.54668	0.188875	13.4835	1.95726e-41	8.39069e-40
RP11-120J4.1	54.3341	-3.06579	0.370221	-8.28096	1.22189e-16	1.44354e-15
FAM49A	17.5442	1.89211	0.660326	2.86541	0.00416468	0.011138
PSMC1P10	21.397	-1.6719	0.513367	-3.25673	0.00112702	0.00339072
VSNL1	76.8337	1.98357	0.30822	6.43556	1.23021e-10	8.7107e-10
SMC6	276.505	1.89789	0.217825	8.71291	2.96175e-18	3.98463e-17
GEN1	106.273	0.908048	0.2862	3.17278	0.00150988	0.00441477
NT5C1B-RDH14	20.0864	-1.01598	0.430134	-2.36202	0.0181758	0.0411925
AC092594.1	7.40102	2.19571	0.82869	2.64962	0.00805835	0.0201238
CISD1P1	247.507	10.8307	1.04012	10.4129	2.16558e-25	4.71187e-24
RP11-79O8.1	5.52962	-2.11928	0.807264	-2.62526	0.00865838	0.0214082
WDR35	136.873	1.2476	0.301187	4.14227	3.43882e-05	0.00013198
AC079145.4	11.0533	2.04627	0.772769	2.64796	0.0080978	0.020199
LAPTM4A	4161.02	1.58106	0.215342	7.34208	2.10298e-13	1.89502e-12
SDC1	37.069	-1.35437	0.43551	-3.10985	0.00187185	0.00536684
AC007041.2	518.045	2.79999	0.214698	13.0415	7.10081e-39	2.82932e-37
RHOB	114.313	-1.02636	0.412962	-2.48537	0.0129417	0.0305759
HS1BP3	157.959	1.17794	0.279685	4.21169	2.53471e-05	9.926e-05
RP11-130L8.2	2.00211	-5.07914	1.77043	-2.86887	0.00411939	0.0110316
GDF7	5.39474	-2.26024	0.886003	-2.55105	0.0107399	0.0259432
AC012065.7	8.74011	-1.6234	0.73392	-2.21196	0.0269694	0.0579998
RP11-130L8.1	6.67682	-1.73858	0.758628	-2.29175	0.0219203	0.0485065
C2orf43	111.818	0.803206	0.303052	2.65039	0.00803995	0.0200933
RP11-531P14.1	6.27191	5.52712	1.20306	4.59421	4.34382e-06	1.89342e-05
KLHL29	23.8568	-1.20178	0.492985	-2.43776	0.0147784	0.0343008
MFSD2B	206.981	-1.12529	0.253894	-4.4321	9.33187e-06	3.89263e-05
FKBP1B	92.4445	1.57633	0.250078	6.30335	2.91277e-10	1.98559e-09
FAM228B	100.117	0.592213	0.267905	2.21053	0.0270681	0.0581879
RPL36AP13	15.4475	-1.93947	0.550291	-3.52444	0.000424378	0.00138226
CENPO	2357.8	-1.04019	0.16415	-6.3368	2.34579e-10	1.61434e-09
DNAJC27-AS1	29.5865	-0.928848	0.462974	-2.00626	0.0448281	0.0894049
SUCLA2P3	2.68482	3.46831	1.35738	2.55515	0.0106143	0.02567
RP11-509E16.1	5.40203	-2.27835	0.943301	-2.41529	0.0157226	0.0362365
RP11-458N5.1	1.67749	-3.20511	1.57428	-2.03592	0.0417585	0.0842858
DTNB	41.9594	1.50282	0.377872	3.97705	6.97742e-05	0.000255809
ASXL2	132.913	0.786358	0.211868	3.71155	0.000205995	0.0007075
PTGES3P2	4.25981	4.16397	1.31893	3.15709	0.00159354	0.00463694
UQCRHP2	2.73667	4.34072	1.48569	2.92169	0.00348141	0.00946658
AC013449.1	232.137	0.958358	0.185907	5.15503	2.53593e-07	1.2785e-06
RAB10	315.065	0.621022	0.164783	3.76873	0.00016408	0.000571092
AC011742.3	34.6022	7.98973	1.07847	7.40837	1.27858e-13	1.16958e-12
SMARCE1P6	7.35112	2.49519	0.836901	2.98147	0.00286869	0.00794093
PPIL1P1	11.4356	6.39496	1.12439	5.68747	1.28937e-08	7.43214e-08
GAREML	16.0125	-1.26129	0.643309	-1.96063	0.0499227	0.0979416
HADHA	429.097	-1.62188	0.325007	-4.99029	6.0288e-07	2.90795e-06
HADHB	428.762	-2.02402	0.207176	-9.76953	1.52157e-22	2.81345e-21
CENPA	75.4451	-0.863856	0.257703	-3.35214	0.000801889	0.00247856
CDKN2AIPNLP2	54.0179	6.59055	0.890419	7.40163	1.34519e-13	1.22792e-12
DPYSL5	49.0337	-1.13351	0.453049	-2.50197	0.0123506	0.0293529
AC013472.4	25.0771	-1.67259	0.542763	-3.08163	0.0020587	0.00585472
AGBL5	7149.2	-1.18415	0.144711	-8.18286	2.77188e-16	3.17927e-15
RP11-503P10.1	30.9862	-1.00142	0.396304	-2.52691	0.0115071	0.0275855
OST4	7494.82	-0.924799	0.145839	-6.34123	2.27932e-10	1.57109e-09
KHK	119.313	1.81341	0.252781	7.17384	7.29222e-13	6.27092e-12
ABHD1	184.052	-1.36674	0.263631	-5.18428	2.16848e-07	1.10158e-06
PREB	178.338	-1.39815	0.292649	-4.77757	1.77429e-06	8.09526e-06
SLC5A6	1080.7	-0.933274	0.183444	-5.08751	3.62803e-07	1.79426e-06
CAD	140.225	-1.37859	0.387312	-3.55939	0.000371716	0.0012244
MPV17	1001.9	0.600233	0.201382	2.98057	0.0028771	0.00796168
GTF3C2	453.791	0.830648	0.21156	3.9263	8.62624e-05	0.000312162
AC074117.10	205.52	-0.947872	0.234552	-4.0412	5.31792e-05	0.000198469
ZNF513	35.1519	-0.950202	0.393054	-2.41748	0.0156282	0.0360412
PPM1G	377.075	-0.978032	0.345519	-2.83062	0.00464584	0.0123007
FTH1P3	177.409	5.05993	0.444721	11.3778	5.39674e-30	1.52393e-28
NRBP1	155.57	1.40326	0.227324	6.17294	6.70302e-10	4.41228e-09
KRTCAP3	12.9595	-3.3833	0.587578	-5.75804	8.50982e-09	5.00513e-08
ZNF512	960.981	1.51354	0.2093	7.23146	4.77838e-13	4.18112e-12
RP11-158I13.2	878.936	1.6084	0.213019	7.55051	4.33566e-14	4.14408e-13
GPN1	1134.96	2.40284	0.243273	9.87715	5.23004e-23	9.99053e-22
SLC4A1AP	480.356	0.624196	0.270161	2.31045	0.020863	0.0464606
BRE	1307.51	2.54783	0.222467	11.4526	2.28232e-30	6.56616e-29
PPP1CB	609.128	1.17004	0.205676	5.68876	1.27964e-08	7.38261e-08
SPDYA	411.53	0.613702	0.260034	2.36008	0.0182711	0.0413627
TRMT61B	310.296	1.23572	0.23114	5.34621	8.98149e-08	4.73863e-07
WDR43	702.263	2.04344	0.210251	9.71905	2.50098e-22	4.54355e-21
CLIP4	63.7011	1.88036	0.409979	4.58649	4.50758e-06	1.96086e-05
YPEL5	258.016	0.903816	0.24703	3.65873	0.000253463	0.000856716
SNORA64	41.898	-0.871255	0.353617	-2.46384	0.0137458	0.0322264
LBH	19.4778	1.54037	0.482565	3.19205	0.00141269	0.0041582
AC092569.2	1.82833	-4.94754	1.59631	-3.09936	0.00193939	0.00554031
GALNT14	390.616	2.00414	0.19997	10.0222	1.21748e-23	2.41442e-22
KRT18P52	4.90568	2.97987	1.09378	2.72438	0.00644224	0.016463
AK2P2	11.6715	2.60959	0.780923	3.34168	0.000832741	0.00256629
MEMO1	146.708	-2.70624	0.301829	-8.96615	3.07049e-19	4.45632e-18
RP11-563N4.1	42.9761	-1.43502	0.355312	-4.03877	5.37332e-05	0.000200249
SLC30A6	154.777	1.4181	0.281886	5.03077	4.88504e-07	2.3837e-06
DDX50P1	82.9053	5.98649	0.602395	9.93782	2.84996e-23	5.53771e-22
YIPF4	240.06	0.892978	0.254158	3.51348	0.000442285	0.00143501
TTC27	477.348	2.61649	0.19249	13.5928	4.41668e-42	1.906e-40
RASGRP3	21.4404	1.53319	0.625851	2.44978	0.0142945	0.0333385
FAM98A	204.962	0.582979	0.179501	3.24778	0.00116308	0.00348548
ATP6V0E1P3	31.6057	4.78437	0.701544	6.81977	9.11842e-12	7.17406e-11
SLC25A5P2	2.83096	3.57871	1.38991	2.57477	0.0100306	0.0244015
AC013442.1	179.608	10.3679	1.04776	9.89527	4.3642e-23	8.37352e-22
HEATR5B	118.981	1.59543	0.290527	5.4915	3.9854e-08	2.1834e-07
EIF2AK2	389.329	1.39988	0.228372	6.12981	8.79832e-10	5.71715e-09
AC007899.3	62.9116	1.7737	0.339241	5.22844	1.70951e-07	8.78041e-07
SULT6B1	321.439	-9.16935	0.58395	-15.7023	1.45898e-55	8.1335e-54
CEBPZ-AS1	1790.69	0.679856	0.17451	3.89581	9.7873e-05	0.000351679
RP11-423P10.2	192.442	0.572312	0.233331	2.45279	0.0141754	0.0330934
NDUFAF7	456.988	2.02023	0.2335	8.65196	5.0622e-18	6.7166e-17
PRKD3	314.327	1.3259	0.248783	5.32954	9.84635e-08	5.17287e-07
AC010878.3	646.603	7.23772	0.385984	18.7513	1.88834e-78	1.50482e-76
RMDN2	63.1737	1.61275	0.414352	3.89221	9.93359e-05	0.000356739
GAPDHP25	2.03998	3.91197	1.49621	2.61459	0.00893352	0.0220068
ATL2	185.379	1.10189	0.252948	4.3562	1.3234e-05	5.40065e-05
GALM	411.647	1.98375	0.209709	9.45953	3.09317e-21	5.20787e-20
DHX57	163.959	1.70029	0.281385	6.04259	1.51662e-09	9.62624e-09
AC007246.3	155.737	0.553961	0.238346	2.32419	0.0201154	0.0449916
THUMPD2	448.16	2.0072	0.219318	9.15201	5.58859e-20	8.5253e-19
LDHAP3	29.6879	3.28462	0.501093	6.55492	5.56699e-11	4.06707e-10
PKDCC	14.7538	-1.37251	0.524672	-2.61594	0.00889829	0.0219346
EML4	187.972	0.997769	0.203438	4.90454	9.36454e-07	4.41848e-06
COX7A2L	2467.72	0.824074	0.198262	4.15649	3.23168e-05	0.000124471
MTA3	160.237	-0.628147	0.201978	-3.10997	0.00187104	0.00536561
AC098824.6	6.58931	2.00013	0.823139	2.42988	0.0151039	0.0349531
THADA	135.315	1.43453	0.217949	6.58198	4.64209e-11	3.40958e-10
ZFP36L2	75.3713	-1.29888	0.502196	-2.5864	0.00969856	0.0236937
AC010883.5	19.9321	-1.59512	0.418428	-3.81217	0.000137753	0.000484721
PLEKHH2	43.5544	2.41682	0.432683	5.58567	2.32797e-08	1.30397e-07
AC011242.6	26.0361	-1.23791	0.35521	-3.485	0.000492131	0.00158349
AC011242.5	5.45984	5.33032	1.23858	4.30358	1.68059e-05	6.76689e-05
DYNC2LI1	725.152	2.07202	0.248733	8.33031	8.0628e-17	9.70637e-16
AC019129.1	40.8354	3.27001	0.567651	5.76061	8.38128e-09	4.93176e-08
AC013717.3	47.9657	-2.1761	0.31173	-6.98073	2.93657e-12	2.40584e-11
PREPL	221.587	1.11463	0.235099	4.74111	2.1255e-06	9.60654e-06
CAMKMT	167.234	1.31917	0.333948	3.95022	7.808e-05	0.000284414
AC012354.8	1221.22	9.1047	0.457705	19.892	4.76894e-88	4.40898e-86
SIX2	19.7538	-0.889574	0.434415	-2.04775	0.0405844	0.0822676
AC009236.2	36.0903	-1.16638	0.353905	-3.29575	0.000981591	0.00298778
SRBD1	214.587	2.39933	0.338482	7.08849	1.35582e-12	1.14063e-11
EPAS1	5.06762	-1.90693	0.832563	-2.29043	0.0219962	0.0486497
RHOQ	375.492	-2.96384	0.341351	-8.68269	3.86515e-18	5.15996e-17
PIGF	374.248	-1.68962	0.171012	-9.88011	5.07789e-23	9.71417e-22
AC016722.4	381.52	-1.02059	0.192988	-5.28836	1.23419e-07	6.43192e-07
MCFD2	795.753	0.544662	0.170974	3.18564	0.00144433	0.00424316
RP11-761B3.1	3370.4	-1.69746	0.208367	-8.14648	3.74678e-16	4.26358e-15
AC073283.4	32.7183	1.09411	0.460392	2.37647	0.0174791	0.0397836
BCYRN1	1719.1	-1.21936	0.188962	-6.45296	1.09688e-10	7.81349e-10
MSH2	757.324	2.17387	0.250858	8.66574	4.48602e-18	5.97041e-17
AC079250.1	46203.5	-0.812469	0.170841	-4.75569	1.97769e-06	8.97281e-06
MSH6	322.832	-0.695064	0.291559	-2.38396	0.0171276	0.0390794
AC006509.4	1.43067	-4.59918	1.90478	-2.41455	0.0157546	0.0363005
AC006509.7	211.444	10.6039	1.03925	10.2034	1.91462e-24	3.95703e-23
FBXO11	267.619	-1.33193	0.411175	-3.23932	0.00119816	0.00358152
AC079807.3	1.93863	2.98817	1.48012	2.01886	0.0435014	0.0871177
FOXN2	46.9553	1.04245	0.355781	2.93003	0.00338931	0.00923838
PPP1R21	109.739	2.17965	0.257323	8.47047	2.44395e-17	3.06574e-16
NA.1	NA	NA	NA	NA	NA	NA
RPL7P13	47.9956	-1.519	0.532481	-2.85268	0.00433522	0.0115667
AC007560.1	11.6385	2.25301	0.634102	3.55307	0.00038077	0.00125073
AC097463.1	60.7189	8.80335	1.06906	8.23462	1.80123e-16	2.09558e-15
GPR75-ASB3	401.16	2.1994	0.268543	8.19013	2.60955e-16	3.00104e-15
ASB3	364.236	2.17598	0.274082	7.93915	2.03565e-15	2.1665e-14
ERLEC1	282.063	1.72477	0.248866	6.93053	4.1926e-12	3.40055e-11
MIR3682	4.82499	-2.03041	0.8683	-2.33837	0.0193681	0.0435413
PSME4	222.992	0.707054	0.260748	2.71163	0.00669523	0.0170625
AC093110.3	7.74331	-2.21481	0.779493	-2.84135	0.00449229	0.0119355
CLHC1	146.879	-1.21357	0.242385	-5.0068	5.5341e-07	2.68479e-06
RPS27A	28844.5	-4.17837	0.156775	-26.6521	1.69259e-156	4.4416e-154
MTIF2	383.386	1.39354	0.216315	6.44218	1.17773e-10	8.35962e-10
CCDC88A	143.434	0.783444	0.207937	3.7677	0.000164756	0.000573137
BTF3P5	5732.49	4.71301	0.193667	24.3357	8.22051e-131	1.31827e-128
CCDC104	1596.7	2.0078	0.214418	9.36394	7.68209e-21	1.25124e-19
SNORA12	40.2625	-1.03714	0.451148	-2.2989	0.0215107	0.0477099
RP11-554J4.1	47.7264	-1.24884	0.318983	-3.91507	9.03771e-05	0.000326234
PNPT1	163.593	-1.88931	0.226965	-8.32424	8.48681e-17	1.01838e-15
EFEMP1	123.359	2.0035	0.328831	6.09281	1.10945e-09	7.13247e-09
VRK2	610.256	0.818002	0.183062	4.46845	7.87894e-06	3.31638e-05
FANCL	1404.36	1.93897	0.198609	9.76276	1.62668e-22	2.99501e-21
RP11-334G22.1	92.8458	-0.867881	0.228459	-3.79885	0.000145366	0.000510058
AC007238.1	531.599	-0.519828	0.171079	-3.03853	0.00237736	0.00669647
BCL11A	114.107	0.731342	0.242094	3.0209	0.00252022	0.00704843
ATP1B3P1	252.019	1.91296	0.296888	6.44339	1.16837e-10	8.2977e-10
PAPOLG	87.1064	1.75244	0.338174	5.18206	2.19443e-07	1.11455e-06
RP11-373L24.1	20.0165	-1.19973	0.491473	-2.44108	0.0146433	0.0340313
AC010733.5	6.04819	2.14277	0.946781	2.26321	0.0236226	0.0518102
PEX13	135.688	0.525315	0.224865	2.33614	0.019484	0.0437641
AHSA2	92.9291	-0.720718	0.290527	-2.48072	0.0131116	0.0309266
AC016894.1	3.10769	-2.21748	1.06562	-2.08093	0.0374403	0.0767083
RP11-355B11.2	68.8467	-1.92412	0.285029	-6.75062	1.47215e-11	1.13791e-10
XPO1	512.479	0.740925	0.161883	4.57693	4.71859e-06	2.04751e-05
AC016727.3	10.9548	3.79828	0.866506	4.38345	1.16816e-05	4.80184e-05
RPS24P7	37.7264	3.13748	0.511977	6.12816	8.88987e-10	5.77375e-09
CCT4	6111.2	0.89413	0.136833	6.53447	6.38353e-11	4.63882e-10
AC107081.5	2494.35	-0.902257	0.172467	-5.23147	1.68163e-07	8.64235e-07
PSAT1P2	1.99713	3.8775	1.51223	2.56409	0.0103448	0.025072
RSL24D1P2	81.5212	9.22785	1.06327	8.67876	4.00096e-18	5.33578e-17
EHBP1	107.087	0.885509	0.318213	2.78276	0.0053899	0.0140375
AC009501.4	38.8743	-1.27636	0.306878	-4.15917	3.19408e-05	0.000123059
WDPCP	74.9044	1.07576	0.326646	3.29336	0.000989988	0.00301012
AC074367.1	2.73477	4.32395	1.4302	3.02332	0.00250017	0.00699761
AC016734.2	529.416	-1.27564	0.281151	-4.53722	5.7001e-06	2.44624e-05
AC096664.1	14999.1	6.09092	0.170117	35.8044	9.42849e-281	8.16476e-278
UGP2	516.959	1.85428	0.214858	8.63027	6.12047e-18	8.07536e-17
AC114752.2	28.155	-2.39026	0.428467	-5.57863	2.42421e-08	1.35554e-07
LGALSL	255.611	0.514949	0.205724	2.50311	0.0123107	0.0292714
AFTPH	44.9613	1.23483	0.30916	3.99414	6.49299e-05	0.000239197
SERTAD2	46.2939	-1.01444	0.355967	-2.84982	0.00437443	0.0116545
RAB1A	784.792	0.542083	0.169121	3.20529	0.00134925	0.00398683
SNORA74	4.47233	-2.05194	0.866713	-2.3675	0.0179087	0.0406616
ACTR2	572.801	0.626986	0.173318	3.61754	0.00029742	0.000994936
SPRED2	29.2085	-0.958445	0.35014	-2.73732	0.00619423	0.0158857
AC074391.1	66.4213	6.16046	0.733159	8.40263	4.36596e-17	5.37043e-16
AC007389.1	67.1393	8.94748	1.07377	8.33277	7.89737e-17	9.51604e-16
AC092669.3	3.94619	2.61053	1.17405	2.22353	0.02618	0.0566068
MEIS1	112.483	1.72907	0.305846	5.65341	1.57295e-08	8.96528e-08
C1D	375.957	-0.956685	0.180471	-5.30106	1.15134e-07	6.01459e-07
WDR92	247.828	2.27467	0.258785	8.78982	1.49799e-18	2.06452e-17
AC017083.2	2.60238	-3.34124	1.3948	-2.39549	0.016598	0.038007
RP11-474G23.1	379.899	1.17257	0.220447	5.31905	1.0431e-07	5.46566e-07
PNO1	391.509	0.595765	0.186686	3.19126	0.00141653	0.00416762
PPP3R1	122.234	0.554132	0.267459	2.07184	0.0382803	0.078152
CNRIP1	75.0264	1.3638	0.351397	3.88109	0.000103988	0.000372518
AC127383.1	5.81913	5.41184	1.27008	4.26104	2.03482e-05	8.08049e-05
APLF	17.1421	2.39426	0.676687	3.53821	0.000402852	0.00131777
GFPT1	238.263	1.73954	0.234002	7.43388	1.05455e-13	9.75992e-13
NFU1	499.836	-0.851659	0.150071	-5.67505	1.3865e-08	7.9549e-08
AAK1	56.9917	1.56317	0.434258	3.59963	0.000318674	0.00106003
ANXA4	765.382	2.84801	0.288409	9.8749	5.34877e-23	1.02023e-21
GMCL1	50.9028	-1.07432	0.35508	-3.02558	0.00248155	0.00695374
MXD1	801.009	-0.720919	0.166409	-4.33221	1.47617e-05	5.98367e-05
ASPRV1	5.4374	-1.85215	0.904056	-2.04872	0.0404898	0.0821079
PCBP1-AS1	635.582	-0.757802	0.174739	-4.33676	1.44601e-05	5.86784e-05
PCBP1	593.986	-1.14301	0.328442	-3.4801	0.000501232	0.00161018
AC016700.3	611.946	-5.08343	0.199249	-25.5129	1.41786e-143	2.7905e-141
AC016700.4	607.313	-5.14515	0.200196	-25.7006	1.15165e-145	2.37451e-143
TIA1	351.987	1.14576	0.201321	5.69123	1.2613e-08	7.28485e-08
AC016700.6	335.411	-0.596648	0.157218	-3.79503	0.000147623	0.000517277
PCYOX1	231.442	0.523475	0.208206	2.51421	0.0119298	0.0284727
SNRPG	6667.14	-4.4075	0.127551	-34.5548	1.2077e-261	8.47969e-259
AC022201.5	829.154	-1.87428	0.219604	-8.53483	1.40359e-17	1.7998e-16
ADD2	197.983	0.965524	0.250981	3.847	0.000119574	0.000424548
AC007395.4	87.0478	6.87572	0.770148	8.92779	4.34613e-19	6.23457e-18
AC007040.11	121.76	0.516642	0.214389	2.40983	0.0159598	0.036705
TEX261	121.301	-0.79116	0.259184	-3.0525	0.00226941	0.00641464
NAGK	570.32	2.2273	0.216041	10.3096	6.37451e-25	1.34856e-23
MPHOSPH10	777.802	1.31088	0.215287	6.08901	1.13614e-09	7.29323e-09
AC007881.4	64.1708	2.89888	0.360982	8.03053	9.70541e-16	1.06432e-14
PAIP2B	147.725	1.44732	0.236758	6.11309	9.77219e-10	6.31836e-09
ZNF638	335.863	1.12149	0.174385	6.43111	1.26673e-10	8.94738e-10
EXOC6B	57.3863	1.35659	0.388248	3.49413	0.000475609	0.00153355
SPR	67.9651	-0.923908	0.356746	-2.58982	0.00960265	0.0234944
SFXN5	87.0345	0.811481	0.289218	2.80577	0.00501958	0.0131707
RAB11FIP5	37.5189	-1.16782	0.456236	-2.55969	0.0104766	0.0253655
SMYD5	155.7	0.790454	0.230641	3.4272	0.000609843	0.00192528
PRADC1	143.691	0.664135	0.245499	2.70525	0.00682539	0.0173566
TPRKB	2097.88	0.625379	0.178443	3.50465	0.000457205	0.00147954
DUSP11	795.841	1.66292	0.211392	7.86655	3.64545e-15	3.79884e-14
STAMBP	912.635	2.09581	0.206063	10.1708	2.67779e-24	5.49064e-23
RP11-51I5.1	22.2776	7.35578	1.10473	6.65847	2.76695e-11	2.07753e-10
DGUOK	3398.38	1.04871	0.176037	5.95733	2.56395e-09	1.58819e-08
DGUOK-AS1	1241.61	-2.87006	0.15454	-18.5716	5.45963e-77	4.24658e-75
TET3	29.0392	-1.27956	0.445112	-2.87469	0.00404421	0.0108493
BOLA3	1671.58	-1.33174	0.138481	-9.61678	6.79245e-22	1.20451e-20
MOB1A	533.873	1.05816	0.170253	6.21523	5.12488e-10	3.4147e-09
RP11-287D1.3	1042.38	-0.562568	0.197404	-2.84983	0.00437431	0.0116545
NECAP1P2	1.51321	3.46664	1.635	2.12027	0.033983	0.0705936
MOGS	155.832	-1.14994	0.293801	-3.91403	9.07696e-05	0.000327514
MRPL53	714.224	-0.564165	0.143917	-3.92008	8.85202e-05	0.000319798
CCDC142	732.402	-0.534686	0.144527	-3.69955	0.000215979	0.000738278
LOXL3	171.097	-1.48144	0.27995	-5.29181	1.21112e-07	6.318e-07
RP11-259N19.1	19.3755	-1.67598	0.597236	-2.80623	0.00501244	0.0131573
MRPL19	626.201	0.606443	0.200096	3.03077	0.00243935	0.00684952
AC005034.3	21.9159	7.32952	1.08589	6.74978	1.48065e-11	1.14413e-10
RP11-342K6.1	30.2209	-1.11776	0.390569	-2.86187	0.00421147	0.0112562
RP11-342K6.2	30.6467	-1.04835	0.33367	-3.14188	0.00167864	0.00486387
RN7SKP203	68.0523	-2.47848	0.315323	-7.86012	3.83767e-15	3.98796e-14
AC105399.2	19937.6	6.88764	0.180219	38.218	0	0
AC016716.1	143.237	-0.570552	0.280376	-2.03496	0.0418553	0.0844289
AC013262.1	1.86798	-2.82643	1.4349	-1.96978	0.0488635	0.0962195
AC109638.1	1313.68	13.2389	1.03593	12.7798	2.12581e-37	8.05051e-36
AC138623.1	202.478	10.5407	1.04761	10.0617	8.15902e-24	1.63426e-22
RPL37P10	35.5507	8.03458	1.12358	7.15088	8.6225e-13	7.36855e-12
SUCLG1	4605.42	2.17944	0.193182	11.2818	1.61466e-29	4.46722e-28
DNAH6	22.0549	1.51339	0.449976	3.36327	0.000770237	0.00238868
LDHAP7	98.7818	3.056	0.313683	9.74232	1.98966e-22	3.6478e-21
TRABD2A	19368.9	-0.777395	0.13266	-5.86006	4.6271e-09	2.79033e-08
TMSB10	27010.4	-0.866361	0.131581	-6.58425	4.57187e-11	3.36086e-10
AC022210.2	5025.53	-1.09085	0.156657	-6.96328	3.32443e-12	2.7176e-11
LSM3P3	1221.74	3.76984	0.190507	19.7885	3.73831e-87	3.37214e-85
TGOLN2	155.873	-0.77277	0.205606	-3.75849	0.00017094	0.000593616
PEBP1P2	432.021	5.49669	0.312106	17.6116	2.00616e-69	1.39353e-67
RETSAT	113.152	0.784074	0.245166	3.19814	0.00138319	0.00407877
ELMOD3	78.5716	0.982875	0.307646	3.19483	0.00139915	0.00412254
RP11-717A5.1	54.9221	3.65512	0.40388	9.05004	1.42919e-19	2.12651e-18
CAPG	161.537	1.27801	0.307588	4.15495	3.2536e-05	0.000125223
TMEM150A	44.1714	-0.589902	0.287151	-2.05432	0.0399444	0.0811412
USP39	877.434	2.24395	0.21436	10.4681	1.21044e-25	2.67398e-24
POLR1A	262.738	0.633894	0.238946	2.65288	0.00798094	0.019967
SNORD94	1.47957	-3.86065	1.80501	-2.13885	0.0324477	0.0678711
IMMT	475.62	-0.539555	0.148177	-3.64128	0.000271285	0.000913273
MRPL35	382.155	-0.828386	0.163203	-5.07581	3.85854e-07	1.90211e-06
REEP1	25.6183	-1.82084	0.476913	-3.81797	0.000134555	0.000474238
SNORA19	6.3809	-2.0505	0.962178	-2.1311	0.0330807	0.0690451
KDM3A	100.411	1.34499	0.279018	4.82043	1.43251e-06	6.6231e-06
CHMP3	1028.32	1.40711	0.210806	6.6749	2.47395e-11	1.86942e-10
RNF103-CHMP3	838.605	1.29337	0.219482	5.89283	3.7963e-09	2.3124e-08
AC015971.2	353.305	-0.903988	0.22913	-3.94531	7.96982e-05	0.000290024
RNF103	40.8474	-1.14892	0.385035	-2.98392	0.00284577	0.00788391
ANAPC1P1	14.3251	2.77235	0.618869	4.4797	7.47494e-06	3.15964e-05
AC092651.1	9.69381	2.48541	0.739852	3.35933	0.00078132	0.00242074
AC083899.3	151.379	0.863295	0.275725	3.131	0.00174211	0.00503352
AC083899.1	135.968	9.96649	1.04755	9.51406	1.83363e-21	3.12777e-20
LINC00152	52.4779	-1.01159	0.318301	-3.1781	0.00148246	0.00434682
AC133644.3	40.171	5.41757	0.720917	7.51484	5.69803e-14	5.39268e-13
RNU2-63P	39.6476	-1.84071	0.336632	-5.46801	4.55116e-08	2.47404e-07
KRCC1	71.0401	0.667513	0.313724	2.12771	0.0333614	0.0695363
MRPL45P1	183.427	7.6232	0.694655	10.9741	5.09143e-28	1.29677e-26
AC012671.2	477.021	5.78604	0.283336	20.4212	1.08444e-92	1.07121e-90
AC104134.2	5.84373	-1.64646	0.731791	-2.24991	0.0244548	0.0534188
RPIA	272.554	1.26627	0.21818	5.80378	6.48374e-09	3.85449e-08
ANKRD36BP2	121.626	2.1084	0.352304	5.98462	2.16899e-09	1.35322e-08
AC018696.4	50.8807	4.7318	0.596208	7.93649	2.07979e-15	2.21075e-14
RP11-575H3.1	5.1489	-1.99633	0.845257	-2.3618	0.0181864	0.0412129
AC027612.1	18.1855	-1.17177	0.472486	-2.48001	0.0131378	0.03098
AC127391.3	34.7733	2.85339	0.432842	6.59222	4.33303e-11	3.19432e-10
ACTR3BP2	11.3851	-2.21578	0.636636	-3.48044	0.000500584	0.00160869
CHEK2P3	59.5842	7.32424	1.04623	7.0006	2.54877e-12	2.09739e-11
AC097374.2	12.1448	3.63042	0.874012	4.15374	3.27079e-05	0.000125866
RPS24P6	82.0707	3.628	0.547841	6.62236	3.53511e-11	2.62847e-10
ZNF514	84.3592	-0.866064	0.258718	-3.34752	0.000815387	0.00251728
ANKRD36C	75.2529	1.91594	0.282007	6.79396	1.09097e-11	8.53938e-11
TMEM127	45.3581	-0.949777	0.40248	-2.35981	0.0182841	0.0413801
NCAPH	885.028	2.31285	0.235681	9.81351	9.84781e-23	1.84187e-21
KANSL3	184.675	1.277	0.208129	6.1356	8.48409e-10	5.5254e-09
LMAN2L	316.291	2.22646	0.245915	9.05378	1.38107e-19	2.05845e-18
CNNM3	55.3896	-1.02393	0.417359	-2.45335	0.0141531	0.0330562
ANKRD39	514.394	0.937029	0.195711	4.78782	1.68599e-06	7.71541e-06
FAM178B	2.95111	2.82642	1.41386	1.99908	0.0456	0.0906382
AC018892.9	6.19319	-3.89938	1.008	-3.86844	0.000109532	0.000391138
ANKRD36	99.9886	1.18581	0.289487	4.09623	4.19938e-05	0.000159101
AC159540.2	35.694	-1.2664	0.330232	-3.83489	0.000125622	0.000444078
ANKRD36B	68.193	0.734667	0.293151	2.50611	0.0122068	0.0290564
LINC01125	14.2813	1.34647	0.581632	2.31498	0.0206139	0.045956
HMGN1P36	730.893	-0.707658	0.174368	-4.05843	4.94041e-05	0.000185195
ATP5BP1	24.4278	7.49252	1.08313	6.91747	4.59793e-12	3.71308e-11
COA5	1563.02	0.719975	0.178806	4.02658	5.65949e-05	0.00021031
UNC50	704.208	0.823324	0.199984	4.11696	3.83905e-05	0.000146275
MGAT4A	29.5503	0.878659	0.361853	2.42822	0.0151731	0.0350914
TSGA10	123.755	0.627829	0.228453	2.74817	0.00599283	0.0154253
AC019097.7	83.3291	-0.846658	0.324852	-2.60629	0.00915283	0.0224767
C2orf15	1367.44	-0.676649	0.182078	-3.71626	0.000202192	0.000695267
LIPT1	77.9527	-0.672914	0.257875	-2.60945	0.00906869	0.0223017
MITD1	525.858	0.749149	0.209115	3.58248	0.00034035	0.0011278
LYG1	12.8434	1.61644	0.625791	2.58303	0.00979357	0.0238944
TXNDC9	442.483	-1.0132	0.168669	-6.00703	1.88953e-09	1.18828e-08
EIF5B	674.163	0.876572	0.195014	4.49491	6.95985e-06	2.95152e-05
LONRF2	10.1783	-2.313	0.609937	-3.7922	0.000149319	0.000522869
CHST10	66.9828	0.531723	0.248839	2.13682	0.0326126	0.0681831
AC068538.2	2.27947	3.22209	1.52988	2.10611	0.0351949	0.0727448
PDCL3	402.843	-2.21279	0.154367	-14.3346	1.33035e-46	6.19374e-45
AC016738.3	2.16603	-2.51501	1.20858	-2.08097	0.0374364	0.0767065
AC016738.4	123.986	-2.99344	0.233811	-12.8028	1.58087e-37	6.02191e-36
RPL31	31867.4	-5.37459	0.158269	-33.9586	9.10921e-253	5.50344e-250
TBC1D8	24.2023	1.05969	0.478911	2.21271	0.0269179	0.057913
RP11-426K3.1	58.6109	8.75135	1.06279	8.23428	1.80634e-16	2.10057e-15
SNORD89	17.8489	-1.43759	0.451608	-3.18326	0.00145628	0.00427537
AC092570.3	2.4058	3.31731	1.45505	2.27986	0.0226161	0.0498678
AC092570.4	5.77592	5.40888	1.23201	4.3903	1.13194e-05	4.66255e-05
MAP4K4	247.103	0.967528	0.211414	4.57647	4.72895e-06	2.05166e-05
IL1R2	20.5228	2.05099	0.67197	3.05221	0.00227164	0.00641954
MFSD9	50.6477	0.776664	0.34539	2.24866	0.0245343	0.0535521
TMEM182	80.8611	1.11599	0.340657	3.27598	0.00105295	0.00318337
AC092568.1	5.73204	5.39651	1.21882	4.42765	9.52644e-06	3.96932e-05
AC018880.2	3.80942	4.81463	1.32279	3.63976	0.000272888	0.00091831
HMGB3P11	2.13906	3.12717	1.45046	2.15599	0.0310843	0.0653719
RP11-13J10.1	12.3108	-1.28586	0.571229	-2.25104	0.0243829	0.0532798
POU3F3	55.2565	-1.29877	0.350193	-3.70872	0.000208312	0.000714409
MRPS9	2212.05	2.43593	0.205781	11.8375	2.49881e-32	7.94572e-31
AC104655.2	503.397	-0.556437	0.202519	-2.74758	0.00600365	0.0154486
RP11-332H14.2	27.5564	-0.785725	0.390148	-2.01392	0.0440182	0.088002
C2orf49	401.541	0.826291	0.20925	3.94882	7.85371e-05	0.000285999
FHL2	268.739	1.50376	0.27766	5.41584	6.10032e-08	3.271e-07
UXS1	582.492	2.13883	0.217512	9.83318	8.10171e-23	1.52077e-21
AC092106.2	16.2877	3.00929	0.718258	4.18971	2.79313e-05	0.00010861
AC092106.1	389.12	10.7614	1.04025	10.3449	4.4118e-25	9.44881e-24
AC114755.2	5.15209	3.68859	1.21917	3.0255	0.00248223	0.00695415
AC114755.3	3.20061	4.55764	1.32938	3.42839	0.000607174	0.00191825
AC114755.7	2.31293	4.09712	1.4485	2.82853	0.0046762	0.0123685
AC108868.3	9.02781	3.95275	0.983925	4.01733	5.88611e-05	0.000218294
EEF1A1P12	9986.14	-4.8337	0.18175	-26.5953	7.69017e-156	1.99783e-153
AC009963.5	55.6381	1.93723	0.834272	2.32206	0.0202299	0.0452282
AC009963.6	102.236	9.5546	1.04589	9.13542	6.51539e-20	9.90423e-19
AC010095.6	1120.61	5.68987	0.220483	25.8064	7.50793e-147	1.59876e-144
CCDC138	587.323	1.99873	0.233875	8.54615	1.27261e-17	1.63588e-16
AC073415.2	6.03181	-3.13147	0.84384	-3.71098	0.00020646	0.000708537
SNRPGP9	3120.4	-0.668765	0.1293	-5.17217	2.31386e-07	1.17177e-06
SOWAHC	15.8203	-1.9616	0.510051	-3.8459	0.000120113	0.000426227
AC109815.2	4.70608	4.34443	1.34084	3.24009	0.0011949	0.00357342
RPL22P11	58.8309	1.56966	0.557146	2.81733	0.00484253	0.0127616
RGPD5	175.977	-0.556532	0.210982	-2.63782	0.00834407	0.0207337
LIMS3	23.724	3.91072	0.684093	5.71666	1.08641e-08	6.31831e-08
ZBTB45P1	17.4755	-0.976723	0.45157	-2.16295	0.0305451	0.0644362
AC013268.3	1.52617	3.48832	1.5951	2.18689	0.0287502	0.0612415
NPHP1	316.989	1.23874	0.210992	5.87102	4.33127e-09	2.62045e-08
AC092664.1	123.09	9.82207	1.05268	9.33054	1.05328e-20	1.69824e-19
AC112229.1	1.74622	3.68526	1.54028	2.3926	0.0167296	0.0382824
ZBTB45P2	17.5862	-1.01866	0.450822	-2.25956	0.0238484	0.0522437
LIMS3L	3.62093	3.13529	1.27792	2.45344	0.0141497	0.0330511
RGPD6	167.997	-0.672744	0.212463	-3.1664	0.00154337	0.00450254
AC114776.1	20.755	1.45361	0.556407	2.6125	0.00898831	0.0221229
BUB1	892.411	2.21843	0.223205	9.93896	2.81761e-23	5.48306e-22
ACOXL	6.83028	2.36331	0.877178	2.69422	0.00705544	0.0178875
RPL5P9	3863.66	7.12387	0.246379	28.9143	7.89581e-184	2.66396e-181
BCL2L11	49.069	-1.33936	0.412083	-3.25022	0.00115314	0.00346048
MIR4435-1HG	55.4781	-1.03804	0.299441	-3.46661	0.000527071	0.00168734
AC068491.3	39.3671	6.14319	0.8967	6.85089	7.33921e-12	5.82896e-11
AC093166.3	128.331	9.88297	1.04776	9.43251	4.00377e-21	6.6804e-20
ANAPC1	277.395	0.86354	0.23565	3.6645	0.000247825	0.000839516
AC104651.1	218.753	5.65704	0.368227	15.3629	2.90291e-53	1.53282e-51
MERTK	48.5318	2.25338	0.401414	5.61361	1.98153e-08	1.11909e-07
AC104651.2	980.86	10.7943	0.861586	12.5284	5.22276e-36	1.90297e-34
ZC3H8	397.14	1.75848	0.269023	6.53655	6.29555e-11	4.58129e-10
TTL	160.615	-0.97749	0.296689	-3.29466	0.000985411	0.00299801
POLR1B	226.043	1.29215	0.239231	5.40125	6.61783e-08	3.53609e-07
AC012442.5	261.972	-0.585874	0.206226	-2.84094	0.00449813	0.0119498
AC079922.2	4327.72	3.14092	0.163105	19.2571	1.23136e-82	1.04883e-80
SLC20A1	589.167	0.62917	0.185419	3.39324	0.000690706	0.00215905
CKAP2L	106.81	0.824065	0.244633	3.36858	0.000755574	0.00234825
AC079753.5	2.30391	4.09067	1.53297	2.66846	0.00761997	0.0191543
AC016724.6	6.27323	5.51911	1.24684	4.42647	9.57882e-06	3.98923e-05
WASH2P	114.487	-0.837598	0.23534	-3.5591	0.000372132	0.00122546
DDX11L2	69.1158	-1.13695	0.319688	-3.55645	0.0003759	0.0012363
RPL23AP7	446.407	-0.887408	0.188053	-4.71892	2.37101e-06	1.06642e-05
RABL2A	75.6445	0.547687	0.254755	2.14986	0.0315666	0.0662414
RP11-395L14.17	1503.62	-1.0209	0.154106	-6.62469	3.4798e-11	2.58809e-10
SLC35F5	154.522	2.07245	0.311269	6.65808	2.7742e-11	2.08237e-10
RP11-141B14.1	4.22302	-1.93055	0.860997	-2.24222	0.0249469	0.0543294
DDX18	364.769	-0.871285	0.164472	-5.29747	1.17417e-07	6.12896e-07
CCDC93	162.259	2.04927	0.232461	8.81555	1.19094e-18	1.6554e-17
INSIG2	139.034	1.1374	0.270679	4.20204	2.64518e-05	0.000103259
STEAP3	118.926	-0.532638	0.240455	-2.21513	0.0267513	0.0576311
C2orf76	383.02	0.522524	0.193866	2.69529	0.00703276	0.0178405
AC016691.2	204.24	7.78526	0.671073	11.6012	4.06271e-31	1.20761e-29
EPB41L5	97.3019	2.07593	0.338188	6.1384	8.33555e-10	5.43547e-09
TMEM185B	59.5654	-1.34562	0.282209	-4.76818	1.85901e-06	8.45801e-06
RALB	233.042	1.43355	0.273806	5.23565	1.64409e-07	8.45947e-07
CLASP1	96.2195	1.67844	0.356536	4.70763	2.50617e-06	1.12332e-05
RNU4ATAC	14.9826	-1.96925	0.548621	-3.58946	0.000331363	0.00109914
NIFK-AS1	916.199	-1.31059	0.163572	-8.01232	1.12567e-15	1.2277e-14
RPL12P15	8.03834	2.64086	1.04294	2.53213	0.011337	0.0272359
NPM1P32	501.121	6.81224	0.364592	18.6845	6.61464e-78	5.19159e-76
NIFK	930.754	-1.30427	0.157375	-8.28762	1.15541e-16	1.36749e-15
TSN	900.891	1.39353	0.232254	6.00002	1.97293e-09	1.23953e-08
RP11-416H1.1	3.35559	-5.81683	1.40468	-4.14102	3.45758e-05	0.00013268
AC092646.2	266.132	10.9353	1.04704	10.4441	1.5598e-25	3.43408e-24
AC110926.4	11.9559	6.45545	1.15389	5.59451	2.21242e-08	1.24247e-07
ERCC3	640.819	2.11083	0.214336	9.8482	6.97823e-23	1.31845e-21
MAP3K2	71.2279	-0.991201	0.3032	-3.26913	0.00107877	0.00325423
IWS1	534.169	1.84005	0.167997	10.9529	6.43618e-28	1.63127e-26
WDR33	318.182	0.518867	0.171488	3.02567	0.00248086	0.00695374
SFT2D3	26.9376	-1.22561	0.578219	-2.11963	0.0340371	0.0707003
RP5-935K16.1	106.437	-0.847786	0.267392	-3.17057	0.00152138	0.00444637
POLR2D	472.352	0.571993	0.19309	2.96232	0.00305329	0.00841071
AC006011.4	257.688	-0.729091	0.163505	-4.45913	8.22937e-06	3.45604e-05
AMMECR1L	88.1664	0.854084	0.234763	3.63806	0.000274695	0.000923674
AC012306.2	2.50604	4.20244	1.40261	2.99617	0.00273394	0.00759219
SAP130	227.214	1.58457	0.195386	8.10994	5.06463e-16	5.67374e-15
AC108059.1	475.574	11.0512	1.03742	10.6526	1.69604e-26	3.97666e-25
UGGT1	268.425	0.899781	0.233171	3.85889	0.000113903	0.000405742
DYNLT3P2	32.7179	4.59686	0.626031	7.34287	2.09064e-13	1.88521e-12
HS6ST1	30.1744	-1.22287	0.495834	-2.46628	0.0136524	0.0320336
AC019050.1	36.2035	-3.88628	0.421955	-9.2102	3.2553e-20	5.03247e-19
RAB6C-AS1	10.7974	2.64763	0.773023	3.42504	0.000614718	0.00193925
AC018804.6	56.4528	-0.881572	0.342484	-2.57406	0.0100514	0.0244437
RHOQP3	26.3892	-1.06141	0.46405	-2.28728	0.0221797	0.0490306
AC018804.7	16.5003	1.61007	0.507845	3.1704	0.00152229	0.00444856
AC068137.13	124.57	-2.35851	0.672901	-3.50499	0.00045662	0.00147783
IMP4	547.526	0.503774	0.158478	3.17883	0.00147871	0.0043373
PTPN18	94.3817	-0.554877	0.27377	-2.0268	0.0426832	0.0857658
FAM168B	188.979	-0.911136	0.331398	-2.74937	0.00597095	0.0153781
PLEKHB2	341.851	1.25862	0.230632	5.45729	4.8346e-08	2.61935e-07
NEK2P4	23.1496	7.41174	1.10504	6.7072	1.98396e-11	1.51414e-10
POTEE	5.99831	1.85261	0.827959	2.23756	0.0252495	0.0548872
AC073869.20	14.663	2.24586	0.579023	3.87871	0.000105012	0.000375876
RHOQP2	24.5365	-1.19603	0.46966	-2.54658	0.0108786	0.0262457
RP11-109E12.1	90.5696	-1.56543	0.387449	-4.04034	5.33732e-05	0.000199079
AC093838.4	196.441	-0.540705	0.224636	-2.40702	0.0160832	0.0369497
C2orf27A	49.035	-0.746255	0.270199	-2.76188	0.00574704	0.0148589
CDC27P1	22.6255	3.49592	0.594807	5.8774	4.16757e-09	2.52553e-08
RP11-725P16.2	9.34722	-1.78716	0.601808	-2.96965	0.00298144	0.00823112
AC016909.2	2.65801	4.28842	1.41195	3.03725	0.00238751	0.0067236
TMEM163	21.4416	1.6477	0.513557	3.20841	0.00133469	0.00394696
CCNT2-AS1	46.5584	1.13255	0.336518	3.36549	0.000764091	0.00237217
RAB3GAP1	494.629	2.57572	0.276054	9.3305	1.05376e-20	1.69824e-19
ZRANB3	243.073	1.66262	0.229186	7.25444	4.03319e-13	3.5518e-12
AC064850.4	181.027	8.34817	0.893218	9.34618	9.08715e-21	1.47271e-19
R3HDM1	281.273	1.4936	0.300444	4.9713	6.65041e-07	3.18648e-06
UBXN4	500.233	1.94419	0.27091	7.17654	7.15002e-13	6.15271e-12
MCM6	1099.22	1.95598	0.171027	11.4366	2.74351e-30	7.84088e-29
DARS	1997.82	2.36737	0.241431	9.80558	1.06538e-22	1.98975e-21
HNRNPKP2	760.238	4.64628	0.243554	19.077	3.92124e-81	3.27556e-79
UBBP1	59.1079	-0.79677	0.366161	-2.17601	0.0295545	0.062713
AC097523.1	63.3988	1.44077	0.512039	2.81379	0.00489609	0.012891
YWHAEP5	2580.17	5.21994	0.235392	22.1755	5.9231e-109	7.15703e-107
AC097523.3	9.60396	4.65034	1.1444	4.06356	4.83299e-05	0.000181282
AC097721.1	1.93927	3.84114	1.54459	2.48684	0.0128883	0.0304664
SPOPL	28.5892	-0.995769	0.467038	-2.1321	0.0329989	0.068891
YY1P2	2.43391	3.33104	1.38469	2.40563	0.0161446	0.0370644
AHCYP4	494.088	11.828	1.05965	11.1622	6.24499e-29	1.68647e-27
MRPS18BP2	1.47657	3.44787	1.6785	2.05414	0.0399619	0.0811704
AC013444.1	5.05891	5.2116	1.26492	4.12009	3.78723e-05	0.000144434
KYNU	15.8876	2.27762	0.617946	3.68579	0.000227996	0.000776189
GTDC1	83.2631	1.74927	0.332721	5.25745	1.46069e-07	7.55471e-07
AC023128.2	22.6783	7.38075	1.11276	6.63281	3.29363e-11	2.45651e-10
AC079248.1	269.461	10.9534	1.06303	10.3039	6.76347e-25	1.42968e-23
ORC4	1062.68	1.99877	0.226344	8.83067	1.04052e-18	1.45488e-17
AC017080.1	507.34	4.14983	0.22025	18.8415	3.45157e-79	2.77611e-77
AC105402.3	3.24449	4.57967	1.34184	3.41298	0.000642558	0.00202095
LYPD6B	83.0382	1.78178	0.331586	5.37352	7.72161e-08	4.1014e-07
TXNP5	729.635	9.36009	0.613975	15.2451	1.77555e-52	9.24388e-51
LYPD6	44.36	1.12672	0.381254	2.9553	0.00312363	0.00858898
MMADHC	999.388	-1.38571	0.155864	-8.89049	6.08398e-19	8.66059e-18
AC144449.1	702.714	-1.90605	0.239063	-7.973	1.54874e-15	1.66603e-14
RND3	93.6473	0.980158	0.235458	4.16276	3.14418e-05	0.000121309
RBM43	52.276	1.23143	0.369229	3.33514	0.000852555	0.00262277
NMI	126.957	1.59623	0.281203	5.67644	1.37527e-08	7.89224e-08
RIF1	376.635	1.30627	0.211853	6.16592	7.00734e-10	4.60054e-09
ARL5A	112.78	-0.961471	0.267874	-3.58927	0.000331604	0.0010998
CACNB4	32.6868	1.62406	0.538554	3.01559	0.00256477	0.00715992
STAM2	155.986	1.97518	0.33098	5.96767	2.40672e-09	1.49437e-08
RPL30P2	11.468	4.29745	0.958265	4.48462	7.30438e-06	3.09157e-05
AC012066.1	104.336	6.55097	0.64011	10.2341	1.39427e-24	2.89774e-23
PRPF40A	939.988	1.66616	0.187494	8.88648	6.30759e-19	8.96416e-18
ARL6IP6	200.459	0.514025	0.224952	2.28505	0.0223101	0.049281
ATP5A1P2	15.2723	1.28999	0.573061	2.25105	0.0243821	0.0532798
AC011308.1	8.83193	-2.43986	0.662155	-3.68472	0.000228952	0.000779035
AC016732.2	124.656	1.80778	0.295245	6.12299	9.1835e-10	5.9585e-09
GALNT5	10.1708	2.56503	0.820157	3.12749	0.00176306	0.00508804
AC005539.2	39.6192	8.18689	1.06425	7.69262	1.44153e-14	1.4261e-13
HNRNPDLP2	25.5019	6.09201	1.07505	5.66671	1.45569e-08	8.33716e-08
AC005042.4	7.80517	-6.30393	1.17579	-5.36145	8.25587e-08	4.37177e-07
BTF3L4P2	1116.61	-0.768843	0.165066	-4.6578	3.1961e-06	1.41354e-05
GSTM3P2	5.10601	4.4646	1.22667	3.6396	0.000273062	0.000918659
WDSUB1	158.704	2.19835	0.296304	7.41922	1.17812e-13	1.08459e-12
BAZ2B	135.328	2.61653	0.292706	8.9391	3.92367e-19	5.6504e-18
AC009506.2	91.4203	6.61553	0.706768	9.36026	7.95374e-21	1.29387e-19
2024-03-07	344.175	1.76017	0.226213	7.78103	7.19383e-15	7.30319e-14
CD302	178.676	0.896543	0.251938	3.55858	0.000372859	0.00122738
LY75	129.602	1.00268	0.274871	3.64783	0.000264464	0.000891233
LY75-CD302	129.529	1.00146	0.274871	3.64338	0.000269077	0.000906307
TANK	275.154	1.20911	0.239848	5.04113	4.62785e-07	2.26203e-06
PSMD14	1920.35	1.37781	0.172914	7.96816	1.6105e-15	1.72889e-14
AHCTF1P1	30.3179	-1.25841	0.39592	-3.17846	0.00148062	0.00434192
DPP4	19.7839	1.69545	0.521835	3.24902	0.00115803	0.00347155
TIMM8AP1	398.004	-1.02038	0.170376	-5.98898	2.11164e-09	1.31934e-08
GCA	216.691	1.41076	0.315473	4.4719	7.75272e-06	3.26696e-05
GRB14	42.0554	0.91096	0.323058	2.8198	0.00480531	0.0126758
MAPRE1P3	26.5101	7.60644	1.1053	6.88181	5.90982e-12	4.72549e-11
GALNT3	18.6528	1.43712	0.528968	2.71684	0.00659081	0.0168195
TTC21B	86.5348	1.88479	0.370165	5.09175	3.54772e-07	1.75689e-06
AC067940.1	2.87431	4.40299	1.35983	3.2379	0.00120411	0.00359725
CERS6-AS1	61.3459	-1.10149	0.337027	-3.26826	0.00108209	0.00326311
SPC25	1143.22	1.67806	0.19614	8.55541	1.17452e-17	1.51655e-16
BBS5	58.7147	2.52157	0.404672	6.23113	4.6308e-10	3.10061e-09
RP11-724O16.1	44.727	2.50515	0.473444	5.29133	1.21432e-07	6.3309e-07
KLHL41	45.3646	2.73276	0.451247	6.05602	1.39533e-09	8.8803e-09
FASTKD1	69.8528	-1.21659	0.26948	-4.51459	6.3439e-06	2.70754e-05
PPIG	274.951	1.00077	0.285124	3.50993	0.000448216	0.00145262
CCDC173	15.1625	2.01529	0.673895	2.99052	0.00278507	0.00772428
AC016772.4	68.8912	8.25862	1.07447	7.68622	1.51544e-14	1.49637e-13
PHOSPHO2	60.0608	0.760933	0.315478	2.412	0.0158654	0.0365072
PTCHD3P2	64.7344	8.89663	1.05835	8.40609	4.23909e-17	5.21683e-16
SSB	2259.89	-1.24228	0.13231	-9.38919	6.0463e-21	9.93529e-20
AC092641.2	6.41931	5.56663	1.29565	4.29639	1.73601e-05	6.97062e-05
GAD1	41.9171	1.86183	0.357504	5.20786	1.91035e-07	9.75603e-07
GORASP2	586.416	1.88728	0.243187	7.76061	8.45239e-15	8.53087e-14
AC008065.1	35.9478	-1.43498	0.557011	-2.5762	0.00998914	0.0243099
DAP3P2	264.242	8.48006	0.759968	11.1585	6.51164e-29	1.75301e-27
AC007969.4	26.6743	7.61572	1.08438	7.0231	2.16991e-12	1.79415e-11
CYBRD1	100.675	1.20059	0.268826	4.46606	7.96748e-06	3.34931e-05
DYNC1I2	179.821	-1.21148	0.189329	-6.39882	1.56581e-10	1.09645e-09
SLC25A12	256.849	2.30867	0.280976	8.21662	2.09317e-16	2.42544e-15
HAT1	1654.38	2.30814	0.207882	11.1031	1.21144e-28	3.19514e-27
METAP1D	78.8375	0.890437	0.321528	2.76939	0.00561618	0.0145539
DLX1	47.9034	-0.88701	0.43502	-2.03901	0.0414491	0.0837787
PDK1	26.2668	1.08513	0.452137	2.4	0.016395	0.0376027
RAPGEF4	17.8086	1.22764	0.563773	2.17754	0.0294406	0.062507
[truncated: 10,819 more rows]

## Sheet: README
The table reports DEGs identified by DESeq2 between sample T48 and sample T0, filtered by absolute value of log2FC (> 0.5) and P value (< 0.05)
